# Supplementary material for: Epigenetic State Changes Underlie Metabolic Switch in Mouse Post-Infarction Border Zone Cardiomyocytes
Source: J Cardiovasc Dev Dis. 2021 Oct 22;8(11):134. doi: 10.3390/jcdd8110134 (PMC8620718; doi:10.3390/jcdd8110134)
Supplement: Supplementary file 1 [file jcdd-08-00134-s001.zip]

Archive with 7 entries (7 files):
- Suppl Table 1.xlsx
- Suppl Table 2.xlsx
- Suppl Table 3.xlsx
- Suppl. Fig. 1.pdf
- Suppl. Fig. 2.pdf
- Suppl. Fig. 3.pdf
- Suppl. Fig. 4.pdf
