# Supplementary material for: Epigenetic State Changes Underlie Metabolic Switch in Mouse Post-Infarction Border Zone Cardiomyocytes
Source: J Cardiovasc Dev Dis. 2021 Oct 22;8(11):134. doi: 10.3390/jcdd8110134 (PMC8620718; doi:10.3390/jcdd8110134)
Supplement: Supplementary file 1 [file jcdd-08-00134-s001.zip › Suppl Table 1.xlsx]

## Sheet: NormalizedCounts
Gene_symbol	Gene_ENSEMBL	BZ-32-S1	BZ-34-S2	BZ-40-S3	BZ_197	BZ_206	RZ-40-S5	RZ-43-S6	RM_197	RM_206	LV_1	LV_2	LV_3
Gnai3	ENSMUSG00000000001	229.34	1.4142	5.16664	72.2478	54.8125	98.3349	179.763	29.8792	92.3007	61.5291	102.949	57.544
Pbsn	ENSMUSG00000000003	0	0	0	0	0	0	0	0	0	0	0	0
Cdc45	ENSMUSG00000000028	0	240.414	0	9.13478	1.50171	26.895	26.3872	24.7571	18.4601	30.7646	15.4424	9.13397
NA	ENSMUSG00000000031	138.714	159.805	6.02775	78.8913	42.048	50.4282	4.123	50.3679	71.0715	34.6101	10.2949	10.0474
Scml2	ENSMUSG00000000037	669.526	18.3846	71.4718	113.77	27.7817	213.479	14.8428	83.6619	21.2292	24.9962	13.3834	6.39378
Apoh	ENSMUSG00000000049	3.69904	2.8284	0	0	3.00343	0	0	0.853693	0	0	0	0
Narf	ENSMUSG00000000056	9.2476	284.254	311.721	272.382	226.759	491.675	981.274	292.817	261.211	292.263	402.531	495.975
Cav2	ENSMUSG00000000058	3.69904	1.4142	0	4.15217	1.50171	47.9068	8.246	11.9517	4.61503	6.72975	5.14746	0
Klf6	ENSMUSG00000000078	168.306	415.775	834.412	964.965	878.502	468.142	530.218	547.217	562.111	232.657	206.928	305.075
Scmh1	ENSMUSG00000000085	2212.02	1097.42	1324.38	598.743	632.972	826.182	781.721	671.856	729.175	643.172	754.617	690.528
Cox5a	ENSMUSG00000000088	25.8933	4.2426	6.88885	53.9782	17.2697	20.1713	66.7926	17.9275	29.5362	20.1892	49.4156	53.8904
Tbx2	ENSMUSG00000000093	12.9466	7.07101	17.2221	24.0826	13.5154	40.3425	3.2984	30.7329	21.2292	5.76836	53.5335	14.6144
Tbx4	ENSMUSG00000000094	1.84952	0	1.72221	1.66087	0	9.24517	1.6492	0	0	3.84557	0	0.913397
Zfy2	ENSMUSG00000000103	0	0	0	0	0	0	0	0	0	0	0	0
Ngfr	ENSMUSG00000000120	0	1.4142	0.861106	1.66087	0	0.84047	0	1.70739	5.53804	0.961393	2.05898	0
Wnt3	ENSMUSG00000000125	0	1.4142	0	0	0.750857	0	0	0	0	3.84557	0	1.82679
Wnt9a	ENSMUSG00000000126	18.4952	28.284	59.4163	67.2652	51.0583	64.7162	2.4738	27.3182	35.0743	12.4981	31.9142	47.4966
Fert2	ENSMUSG00000000127	220.093	417.189	145.527	283.178	379.934	183.222	204.501	284.28	366.434	252.846	250.166	154.364
Xpo6	ENSMUSG00000000131	21835.4	12422.3	11095.4	6148.54	7180.44	7375.96	4809.89	6016.83	5881.4	6143.3	3985.16	4134.95
Tfe3	ENSMUSG00000000134	710.215	241.828	485.664	257.435	279.319	258.024	151.726	170.739	178.14	199.97	206.928	232.003
Axin2	ENSMUSG00000000142	151.661	265.87	223.888	78.8913	122.39	137.837	77.5124	81.9545	110.761	100.946	45.2976	139.75
Brat1	ENSMUSG00000000148	35.1409	35.355	154.999	35.7087	45.8023	108.421	28.861	40.1236	88.6086	54.7994	38.0912	37.4493
Gna12	ENSMUSG00000000149	114.67	53.7396	60.2775	143.665	99.1131	142.039	155.849	84.5156	93.2237	95.1779	190.456	195.467
Slc22a18	ENSMUSG00000000154	3.69904	2.8284	7.74996	0	0	0.84047	0	0	0	0	0	0
Itgb2l	ENSMUSG00000000157	0	0	0	0.830434	0	0	0	4.26846	0	0	0	0
Igsf5	ENSMUSG00000000159	29.5923	0	0	0	0	0	0	0	0	0	1.02949	0
Pih1d2	ENSMUSG00000000167	3.69904	0	18.0832	44.013	13.5154	22.6927	5.7722	9.39062	7.38405	18.2665	29.8552	18.2679
Dlat	ENSMUSG00000000168	77.6798	141.42	778.44	548.087	298.841	592.531	1256.69	485.751	340.589	407.63	668.14	477.707
Sdhd	ENSMUSG00000000171	1.84952	15.5562	24.9721	88.8565	59.3177	38.6616	208.624	134.883	51.6884	59.6063	147.217	142.49
Fgf23	ENSMUSG00000000182	22.1942	1.4142	1.72221	37.3695	9.76114	0.84047	0	14.5128	5.53804	0	7.20644	0
Fgf6	ENSMUSG00000000183	172.005	115.965	91.2773	31.5565	81.0925	49.5877	28.861	51.2216	34.1512	27.8804	24.7078	15.5278
Ccnd2	ENSMUSG00000000184	107.272	144.249	268.665	96.3304	167.441	226.086	113.795	145.981	151.373	154.784	129.716	121.482
Gpr107	ENSMUSG00000000194	830.434	815.994	1059.16	754.865	825.943	1097.65	902.937	647.099	836.244	708.546	790.649	857.68
Nalcn	ENSMUSG00000000197	0	0	0	8.30434	9.01028	1.68094	0.8246	1.70739	7.38405	2.88418	0	0
Btbd17	ENSMUSG00000000202	0	0	0	0	0	0	0	0	0	0	0	0
Slfn4	ENSMUSG00000000204	0	0	0	0	0	1.68094	1.6492	2.56108	2.76902	5.76836	2.05898	0
Th	ENSMUSG00000000214	1.84952	1.4142	15.4999	2.4913	1.50171	5.04282	0.8246	2.56108	3.69203	1.92279	4.11796	9.13397
Ins2	ENSMUSG00000000215	0	0	0	0	0	0	0	0	0	0	0	0
Scnn1g	ENSMUSG00000000216	1.84952	0	0	0	0	0	0	0	0	0	0	0
Drp2	ENSMUSG00000000223	27.7428	35.355	27.5554	14.9478	10.512	3.36188	4.123	6.82954	8.30706	4.80696	4.11796	4.56699
Tspan32	ENSMUSG00000000244	0	72.1243	8.61106	3.32174	0.750857	0	28.0364	4.26846	4.61503	13.4595	14.4129	8.22057
Lhx2	ENSMUSG00000000247	3.69904	0	0	0	0	2.52141	0	0.853693	0	0.961393	0	0
Clec2g	ENSMUSG00000000248	29.5923	43.8402	22.3888	25.7435	18.7714	27.7355	14.8428	22.196	23.0752	24.9962	18.5308	14.6144
Gmpr	ENSMUSG00000000253	81.3788	96.1657	413.331	141.174	208.738	233.651	216.045	175.007	247.366	343.217	310.906	271.279
Glra1	ENSMUSG00000000263	0	1.4142	0	0	0	0	0	0	0	1.92279	0	0
Mid2	ENSMUSG00000000266	75.8303	226.272	582.969	263.248	282.322	205.075	194.606	280.011	300.9	149.016	124.568	189.987
Trim25	ENSMUSG00000000275	42.5389	117.379	32.722	100.483	57.816	141.199	55.2482	116.956	155.988	64.4133	128.686	114.175
Dgke	ENSMUSG00000000276	244.137	336.58	660.469	180.204	293.585	323.581	432.09	239.888	436.582	273.035	221.341	373.579
Scpep1	ENSMUSG00000000278	1.84952	26.8698	30.1387	1.66087	6.00685	16.8094	44.5284	35.8551	26.7672	6.72975	36.0322	21.0081
Mnt	ENSMUSG00000000282	516.016	1344.91	643.247	235.843	311.606	273.993	213.571	247.571	414.43	441.279	414.885	223.782
Itgb2	ENSMUSG00000000290	0	219.201	57.6941	0.830434	11.2629	5.04282	9.0706	5.12216	11.9991	0.961393	8.23593	2.74019
Hddc2	ENSMUSG00000000295	0	0	0	0.830434	5.256	6.72376	0	9.39062	18.4601	14.4209	5.14746	9.13397
Tpd52l1	ENSMUSG00000000296	1.84952	0	4.30553	4.15217	0	2.52141	2.4738	0.853693	1.84601	6.72975	1.02949	2.74019
Pemt	ENSMUSG00000000301	0	1.4142	3.44443	13.287	1.50171	2.52141	4.123	1.70739	0.923007	0	1.02949	3.65359
Cdh1	ENSMUSG00000000303	85.0779	7.07101	8.61106	23.2522	8.25943	18.4903	10.7198	5.97585	5.53804	30.7646	13.3834	20.0947
Cdh4	ENSMUSG00000000305	11.0971	57.9823	46.4998	18.2696	60.0685	50.4282	13.1936	27.3182	47.9963	74.0272	28.8258	22.8349
Ckmt1	ENSMUSG00000000308	0	9.89941	3.44443	10.7956	44.3006	0	1.6492	0.853693	5.53804	0.961393	2.05898	4.56699
Bcl6b	ENSMUSG00000000317	12.9466	43.8402	20.6666	2.4913	21.7748	41.183	40.4054	26.4645	31.3822	58.6449	31.9142	31.9689
Clec10a	ENSMUSG00000000318	18.4952	1.4142	6.02775	3.32174	8.25943	2.52141	2.4738	18.7812	1.84601	0.961393	10.2949	1.82679
Alox12	ENSMUSG00000000320	3.69904	14.142	20.6666	24.913	8.25943	28.576	20.615	18.7812	24.9212	13.4595	12.3539	10.9608
Arvcf	ENSMUSG00000000325	366.205	166.876	238.526	497.43	351.401	237.853	254.801	422.578	422.737	292.263	204.869	312.382
Comt	ENSMUSG00000000326	4514.68	2947.2	3229.15	4817.35	4343.71	2507.12	3685.96	7993.98	5649.72	6269.24	5527.34	4888.5
Rtca	ENSMUSG00000000339	53.6361	1.4142	206.666	29.0652	54.8125	42.0235	118.742	15.3665	56.3034	18.2665	27.7963	17.3545
Dbt	ENSMUSG00000000340	136.864	161.219	168.777	80.5521	100.615	225.246	193.781	52.929	105.223	111.522	100.89	168.065
NA	ENSMUSG00000000346	86.9274	50.9112	195.471	142.835	114.13	95.8135	202.852	89.6377	108.915	149.016	120.45	108.694
Mcts1	ENSMUSG00000000355	190.5	60.8107	61.1386	124.565	93.1062	132.794	151.726	105.004	125.529	94.2165	114.274	148.884
Rem1	ENSMUSG00000000359	29.5923	0	30.1387	16.6087	0	5.88329	5.7722	13.6591	26.7672	21.1506	21.6193	6.39378
Rnf17	ENSMUSG00000000365	0	1.4142	1.72221	4.98261	1.50171	2.52141	40.4054	16.2202	3.69203	6.72975	3.08847	2.74019
Trappc10	ENSMUSG00000000374	558.555	312.538	476.192	254.943	434.746	394.18	214.396	339.77	311.053	298.993	167.807	259.405
Ccm2	ENSMUSG00000000378	29.5923	32.5266	41.3331	95.5	62.3211	79.0041	125.339	97.321	83.0706	40.3785	97.8017	60.2842
Wap	ENSMUSG00000000381	0	0	8.61106	1.66087	0.750857	15.9689	8.246	0	0	4.80696	4.11796	27.4019
Tbrg4	ENSMUSG00000000384	1318.71	1401.47	657.885	1013.96	801.915	837.108	1037.35	1234.44	929.468	1038.3	910.07	773.647
Tmprss2	ENSMUSG00000000385	0	0	0	0	0	10.0856	0	0	0	2.88418	5.14746	5.48038
Mx1	ENSMUSG00000000386	0	15.5562	0.861106	4.15217	6.75771	8.4047	6.5968	2.56108	6.46105	4.80696	6.17695	5.48038
Fap	ENSMUSG00000000392	1.84952	1.4142	0	15.7783	15.768	18.4903	0.8246	19.6349	10.1531	2.88418	26.7668	7.30718
Gcg	ENSMUSG00000000394	0	0	0	0	0	0	0	0	0	0	0	0
Ndufa9	ENSMUSG00000000399	3.69904	0	46.4998	76.4	36.0411	61.3543	159.148	64.027	90.4546	47.1082	74.1234	137.923
Egfl6	ENSMUSG00000000402	7.39808	8.48521	0.861106	2.4913	4.50514	2.52141	0.8246	5.12216	8.30706	1.92279	6.17695	1.82679
Lck	ENSMUSG00000000409	0	0	0	0	0	0.84047	0	0.853693	0	6.72975	1.02949	0.913397
Tssk3	ENSMUSG00000000411	12.9466	0	2.58332	0.830434	1.50171	0	18.9658	0	1.84601	9.61393	0	8.22057
Cttnbp2	ENSMUSG00000000416	33.2913	7.07101	3.44443	26.5739	0.750857	6.72376	5.7722	3.41477	16.6141	2.88418	11.3244	0.913397
Galnt1	ENSMUSG00000000420	46.238	140.006	301.387	366.222	440.002	413.511	456.004	386.723	375.664	347.063	351.056	301.421
Myf5	ENSMUSG00000000435	0	0	0	0	0	0	0.8246	0	0	0	0	0
Mkrn2	ENSMUSG00000000439	1342.75	441.231	345.304	82.213	183.209	211.798	273.767	169.885	179.063	171.128	219.282	207.341
Pparg	ENSMUSG00000000440	194.2	142.834	217.86	135.361	247.783	135.316	215.221	163.909	224.291	105.753	105.008	79.4655
Raf1	ENSMUSG00000000441	1204.04	1124.29	1274.44	996.521	1180.35	1263.23	2129.94	1295.91	1375.28	1098.87	1062.43	1044.93
37135	ENSMUSG00000000486	0	0	0	7.47391	0	0	2.4738	4.26846	1.84601	0	1.02949	0
Pdgfb	ENSMUSG00000000489	1007.99	415.775	297.943	196.813	213.243	110.102	21.4396	100.736	62.7644	24.9962	19.5603	19.1813
Acvrl1	ENSMUSG00000000530	42.5389	74.9527	6.02775	62.2826	57.0651	19.3308	15.6674	42.6846	26.7672	32.6873	39.1207	15.5278
Grasp	ENSMUSG00000000531	7.39808	67.8817	6.02775	14.9478	39.0446	7.56423	25.5626	25.6108	38.7663	30.7646	17.5014	33.7957
Acvr1b	ENSMUSG00000000532	497.521	390.32	360.804	308.091	383.688	261.386	176.464	214.277	368.28	245.155	212.075	222.869
Tom1l2	ENSMUSG00000000538	6776.64	4456.15	4262.48	2264.59	1836.6	2393.66	2198.38	2231.55	2180.14	2091.99	1714.1	1921.79
Gpa33	ENSMUSG00000000544	0	0	1.72221	0	0	0	0	0	0	0	0	0
Zfp385a	ENSMUSG00000000552	282.976	383.249	123.138	58.1304	40.5463	79.0041	40.4054	56.3437	53.5344	46.1468	120.45	39.2761
Itga5	ENSMUSG00000000555	19804.7	11330.6	5825.39	5256.65	6527.95	2370.12	1435.63	3776.74	3926.47	1716.09	1403.2	1318.95
Gabra2	ENSMUSG00000000560	0	1.4142	0	0	0	0	0	1.70739	0	0	1.02949	0.913397
Wdr77	ENSMUSG00000000561	170.156	205.059	295.36	224.217	188.465	141.199	290.259	166.47	179.986	189.394	154.424	167.152
Adora3	ENSMUSG00000000562	0	1.4142	16.361	0	1.50171	5.88329	0.8246	5.12216	1.84601	22.112	10.2949	16.4411
Atp5f1	ENSMUSG00000000563	90.6264	39.5976	113.666	263.248	232.015	363.083	486.514	253.547	242.751	246.116	399.443	423.816
Sox9	ENSMUSG00000000567	473.477	528.911	88.694	68.9261	32.2868	26.895	26.3872	36.7088	22.1522	6.72975	15.4424	14.6144
Hnrnpd	ENSMUSG00000000568	427.239	373.349	303.971	494.939	622.46	368.966	374.368	634.294	429.198	377.827	394.295	488.667
NA	ENSMUSG00000000579	24.0437	19.7988	51.6664	96.3304	75.0857	132.794	259.749	74.2713	59.9954	90.3709	66.9169	160.758
C1d	ENSMUSG00000000581	14.7962	42.426	14.6388	17.4391	44.3006	67.2376	38.7562	56.3437	72.9175	61.5291	40.1502	42.0163
Gm2a	ENSMUSG00000000594	0	12.7278	146.388	4.15217	23.2766	10.0856	21.4396	17.0739	1.84601	0.961393	5.14746	5.48038
Krit1	ENSMUSG00000000600	44.3885	199.402	264.36	410.235	349.148	242.055	597.835	354.283	298.131	158.63	236.783	187.246
Clcn4-2	ENSMUSG00000000605	360.656	199.402	420.22	391.965	352.152	168.094	253.152	464.409	333.205	338.41	228.547	332.477
Vmn2r88	ENSMUSG00000000606	0	0	0	0	0.750857	0	5.7722	0	0.923007	0	0	0
Grm6	ENSMUSG00000000617	0	0	0	0	0	0	0	0	1.84601	0.961393	0	0
Sema4f	ENSMUSG00000000627	9.2476	11.3136	4.30553	0	0.750857	0.84047	2.4738	0	5.53804	3.84557	3.08847	4.56699
Hk2	ENSMUSG00000000628	4240.95	2088.78	2930.35	2822.65	2341.92	1903.66	3407.25	3066.46	2369.36	3469.67	3686.61	2954.84
Myo18a	ENSMUSG00000000631	34378.9	18715.5	6960.32	4962.68	7436.49	6757.38	3557.32	6208.91	7026.85	8486.21	4963.18	4602.61
Sez6	ENSMUSG00000000632	20.3447	2.8284	8.61106	0.830434	3.00343	4.20235	8.246	0	1.84601	4.80696	6.17695	6.39378
Haao	ENSMUSG00000000673	0	0	0	0	0.750857	5.04282	0	4.26846	0	0	0	0
Cd52	ENSMUSG00000000682	0	0	0	0	0	0	0	0	0	0	1.02949	0
Abhd15	ENSMUSG00000000686	0	22.6272	4.30553	9.13478	3.00343	8.4047	15.6674	9.39062	21.2292	1.92279	15.4424	8.22057
Hoxb6	ENSMUSG00000000690	1.84952	1.4142	0.861106	0	0	0.84047	0	2.56108	1.84601	0.961393	0	0
Loxl3	ENSMUSG00000000693	57.3351	329.509	55.9719	126.226	96.8605	73.9613	15.6674	90.4914	62.7644	8.65253	19.5603	4.56699
Tcl1b5	ENSMUSG00000000701	1.84952	0	6.02775	0	0	0.84047	0	0	0	0	0	0
Btn1a1	ENSMUSG00000000706	1.84952	5.65681	4.30553	0.830434	9.01028	14.288	20.615	4.26846	0.923007	6.72975	5.14746	5.48038
Kat2b	ENSMUSG00000000708	998.74	661.846	977.356	468.365	573.655	557.231	225.116	458.433	608.261	390.325	327.378	249.357
Rab5b	ENSMUSG00000000711	59.1846	36.7692	102.472	179.374	65.3245	160.53	145.13	150.25	103.377	61.5291	176.043	147.97
Cryba1	ENSMUSG00000000724	3.69904	9.89941	24.9721	18.2696	11.2629	52.1091	70.9156	8.53693	15.6911	13.4595	16.4719	23.7483
Dnmt3l	ENSMUSG00000000730	0	0	0	0	0	5.88329	0	2.56108	0	1.92279	3.08847	0
Aire	ENSMUSG00000000731	7.39808	0	3.44443	6.64348	0	0	2.4738	1.70739	0.923007	5.76836	3.08847	2.74019
Icosl	ENSMUSG00000000732	0	1.4142	13.7777	4.98261	8.25943	9.24517	15.6674	2.56108	4.61503	23.0734	46.3271	40.1895
Spg7	ENSMUSG00000000738	129.466	241.828	503.747	164.426	207.236	277.355	231.713	289.402	235.367	210.545	240.901	125.135
Sult5a1	ENSMUSG00000000739	0	0	0	6.64348	0	0.84047	0.8246	0	0.923007	0	3.08847	4.56699
NA	ENSMUSG00000000740	94.3255	29.6982	21.5277	223.387	192.219	77.3232	189.658	186.105	216.907	170.166	241.93	193.64
Chmp1a	ENSMUSG00000000743	38.8399	196.574	146.388	115.43	81.8434	84.047	98.1274	203.179	69.2255	119.213	91.6247	119.655
Rpa1	ENSMUSG00000000751	48.0875	87.6805	94.7217	132.87	154.677	87.4088	124.515	82.8082	69.2255	41.3399	64.8579	93.1665
Serpinf1	ENSMUSG00000000753	90.6264	59.3965	76.6385	57.3	67.5771	72.2804	32.1594	29.0256	78.4556	65.3747	58.681	57.544
Tubgcp3	ENSMUSG00000000759	819.337	712.757	998.884	703.378	896.523	820.298	931.798	810.154	796.555	698.932	528.129	648.512
Oprm1	ENSMUSG00000000766	5.54856	12.7278	1.72221	0	0	0.84047	0	0	0	4.80696	1.02949	3.65359
Polr3d	ENSMUSG00000000776	641.783	339.408	150.694	208.439	286.827	156.327	216.87	291.109	246.443	280.727	212.075	237.483
Tcf7	ENSMUSG00000000782	0	1.4142	0.861106	4.98261	18.0206	26.0546	11.5444	6.82954	7.38405	0	5.14746	10.9608
Ddx3x	ENSMUSG00000000787	48.0875	316.781	267.804	429.335	325.121	168.934	422.195	402.089	365.511	333.603	375.764	441.171
Il12rb1	ENSMUSG00000000791	0	0	0	0	0	0	0	0	0	0	0	0
Slc5a5	ENSMUSG00000000792	0	0	0	5.81304	10.512	8.4047	3.2984	0.853693	10.1531	0.961393	0	15.5278
Kcnn3	ENSMUSG00000000794	36.9904	0	62.8608	12.4565	6.00685	1.68094	0	2.56108	5.53804	11.5367	2.05898	0.913397
Usp32	ENSMUSG00000000804	737.958	258.799	587.275	686.769	678.775	405.106	638.24	636.001	549.189	354.754	288.258	258.491
Car4	ENSMUSG00000000805	0	0	0	6.64348	0	1.68094	0	0	0	2.88418	20.5898	0
Txnrd3	ENSMUSG00000000811	20.3447	11.3136	28.4165	53.1478	61.5703	6.72376	23.9134	38.4162	67.3795	12.4981	47.3566	47.4966
Fasl	ENSMUSG00000000817	0	0	0	0	0	0	0	0	0	0	0	0
Znf512b	ENSMUSG00000000823	3601.01	2600.72	1145.27	690.921	1272.7	984.19	588.764	907.475	1099.3	963.315	625.931	785.521
Dnajc5	ENSMUSG00000000826	458.681	627.905	336.693	499.922	466.282	547.146	493.935	495.142	494.732	567.222	649.609	604.669
Tpd52l2	ENSMUSG00000000827	229.34	712.757	433.137	538.952	418.227	680.78	696.787	658.197	595.339	801.801	743.293	664.953
Fmr1	ENSMUSG00000000838	112.821	154.148	376.304	294.804	261.298	186.584	235.836	295.378	329.513	270.151	278.992	227.436
Bcl11a	ENSMUSG00000000861	46.238	53.7396	175.666	78.8913	127.646	169.775	134.41	78.5397	91.3777	99.0234	189.426	178.112
Il4	ENSMUSG00000000869	0	0	1.72221	2.4913	4.50514	1.68094	0	10.2443	4.61503	0	7.20644	0.913397
Pxmp4	ENSMUSG00000000876	203.447	135.763	177.388	173.561	172.697	315.176	296.856	144.274	215.061	292.263	285.169	258.491
Dlg3	ENSMUSG00000000881	186.801	318.195	248.86	75.5695	129.147	316.017	305.102	231.351	155.065	187.472	194.574	179.939
Gnb1l	ENSMUSG00000000884	22.1942	0	0.861106	24.913	42.048	4.20235	21.4396	23.0497	39.6893	24.9962	37.0617	21.9215
Dbh	ENSMUSG00000000889	0	2.8284	13.7777	3.32174	6.00685	27.7355	47.8268	10.2443	35.0743	63.4519	13.3834	31.0555
Mmp11	ENSMUSG00000000901	0	18.3846	30.1387	69.7565	89.352	35.2997	41.23	68.2954	95.0697	49.031	39.1207	52.977
Smarcb1	ENSMUSG00000000902	273.729	620.834	911.912	535.63	314.609	519.41	300.154	437.944	333.205	376.866	404.59	378.146
Vpreb3	ENSMUSG00000000903	0	0	0	0	0.750857	0	0.8246	0	0	0	0	3.65359
Hip1r	ENSMUSG00000000915	1431.53	328.095	570.052	123.735	271.059	229.448	64.3188	161.348	274.133	96.1393	60.74	96.8201
Nsun5	ENSMUSG00000000916	242.287	161.219	98.1661	185.187	317.612	205.915	333.138	265.498	240.905	311.491	255.314	239.31
Top1mt	ENSMUSG00000000934	64.7332	11.3136	0	33.2174	17.2697	8.4047	37.9316	23.0497	63.6875	29.8032	32.9437	14.6144
Hoxa10	ENSMUSG00000000938	0	0	0	0	0	0	0	0	0	0	0	0
Hoxa4	ENSMUSG00000000942	0	0	0	0	0	0	0	0	5.53804	0	0	0.913397
Snrpn	ENSMUSG00000000948	20.3447	203.645	111.944	166.087	117.134	380.733	297.681	290.256	179.986	196.124	263.55	335.217
Mmp14	ENSMUSG00000000957	258.933	19.7988	6.02775	44.8435	42.7988	15.1285	44.5284	33.294	43.3813	14.4209	33.9732	7.30718
Slc7a7	ENSMUSG00000000958	0	0	18.0832	11.6261	5.256	5.88329	17.3166	11.9517	15.6911	0.961393	1.02949	6.39378
Oxa1l	ENSMUSG00000000959	739.808	342.237	281.582	185.187	203.482	513.527	220.993	358.551	333.205	463.391	519.893	388.194
Heatr6	ENSMUSG00000000976	234.889	277.183	340.998	311.413	394.2	242.055	321.594	348.307	368.28	564.337	269.727	359.878
Ccl3	ENSMUSG00000000982	0	0	0	0	0	0	0	0	0	0	0	0.913397
Wfdc18	ENSMUSG00000000983	0	4.2426	0	0	0	0	0	0	0	0	0	0
Icam4	ENSMUSG00000001014	0	0	0	0	0	0	0	0	0	0	0	0
Ilf2	ENSMUSG00000001016	5.54856	33.9408	133.472	122.904	63.8228	159.689	145.13	96.4673	79.3786	93.2551	84.4183	102.3
Chtop	ENSMUSG00000001017	208.996	134.349	470.164	433.487	578.911	497.558	728.122	674.417	593.493	377.827	514.746	485.014
Snapin	ENSMUSG00000001018	38.8399	82.0237	105.916	271.552	162.185	236.172	451.056	272.328	275.056	161.514	190.456	212.822
S100a4	ENSMUSG00000001020	0	0	0	8.30434	0	0	0	1.70739	7.38405	0	0	0
S100a3	ENSMUSG00000001021	0	0	0	0	0	0	0	0	0	0	0	0
S100a5	ENSMUSG00000001023	0	0	0	0	0	0	0	0	0	0	0	0
S100a6	ENSMUSG00000001025	0	0	0.861106	5.81304	0	0	5.7722	0	7.38405	0	13.3834	2.74019
Scn4a	ENSMUSG00000001027	227.491	271.527	470.164	104.635	144.915	231.129	417.248	254.4	258.442	291.302	313.995	251.184
Icam2	ENSMUSG00000001029	0	4.2426	58.5552	26.5739	11.2629	0.84047	16.492	8.53693	23.0752	1.92279	22.6488	14.6144
Mapk7	ENSMUSG00000001034	144.262	152.734	291.054	147.817	263.551	108.421	30.5102	56.3437	131.067	94.2165	39.1207	31.0555
Epn2	ENSMUSG00000001036	325.515	397.391	241.11	283.178	165.939	301.729	114.619	149.396	190.139	130.749	138.981	183.593
B9d1	ENSMUSG00000001039	51.7865	38.1834	9.47217	9.96521	18.7714	31.9378	6.5968	9.39062	16.6141	6.72975	2.05898	1.82679
Sec24b	ENSMUSG00000001052	1022.78	1398.65	960.134	1323.71	1906.43	803.489	706.682	1330.05	1433.43	941.203	889.48	912.484
N4bp3	ENSMUSG00000001053	0	41.0118	0	19.9304	4.50514	107.58	11.5444	36.7088	20.3061	31.726	4.11796	4.56699
Rmnd5b	ENSMUSG00000001054	51.7865	159.805	163.61	90.5173	128.397	82.366	96.4782	122.932	145.835	77.8728	61.7695	90.4263
Nhp2	ENSMUSG00000001056	14.7962	7.07101	6.88885	15.7783	5.256	2.52141	1.6492	8.53693	0.923007	9.61393	5.14746	13.701
Vps9d1	ENSMUSG00000001062	1076.42	315.367	309.998	140.343	164.438	526.134	279.539	233.058	244.597	274.958	214.134	241.137
Zfp276	ENSMUSG00000001065	976.546	815.994	770.69	492.448	578.16	441.247	337.261	643.684	601.8	848.91	499.303	480.447
C1ql4	ENSMUSG00000001076	0	1.4142	0	0	0	0	0.8246	0	0	0	0	0
Mfsd10	ENSMUSG00000001082	292.224	121.621	295.36	47.3348	55.5634	79.8446	23.0888	42.6846	49.8424	11.5367	17.5014	31.0555
Luzp1	ENSMUSG00000001089	1078.27	1120.05	1266.69	1158.46	1202.87	997.637	792.441	1451.28	1336.51	1324.8	1097.44	1189.24
Slc13a2	ENSMUSG00000001095	0	0	0	1.66087	0	0	0	0	0	0	0	0
Kctd10	ENSMUSG00000001098	131.316	32.5266	98.1661	61.4521	102.117	89.0898	35.4578	64.8807	76.6095	73.0658	57.6515	26.4885
Poldip2	ENSMUSG00000001100	5.54856	161.219	200.638	260.756	220.752	242.896	403.229	258.669	190.139	243.232	288.258	208.255
Sebox	ENSMUSG00000001103	0	0	0.861106	0	3.75428	5.04282	0	0	1.84601	0	4.11796	0
Ift20	ENSMUSG00000001105	0	8.48521	4.30553	87.1956	53.3108	122.709	61.0204	39.2699	58.1494	90.3709	119.421	74.8986
Col6a1	ENSMUSG00000001119	473.477	643.462	255.749	193.491	123.141	143.72	109.672	137.445	143.066	24.0348	74.1234	66.678
Pcbp3	ENSMUSG00000001120	0	36.7692	1.72221	13.287	6.75771	12.607	0	15.3665	22.1522	5.76836	5.14746	1.82679
Lgals9	ENSMUSG00000001123	0	5.65681	1.72221	4.98261	40.5463	12.607	23.9134	10.2443	19.3831	76.9114	3.08847	5.48038
Araf	ENSMUSG00000001127	638.084	903.675	878.329	705.869	653.245	1059.83	1443.87	700.028	688.563	931.589	1156.12	1046.75
Cfp	ENSMUSG00000001128	64.7332	106.065	47.3609	121.243	122.39	126.911	211.098	138.298	98.7617	113.444	155.453	136.096
Timp1	ENSMUSG00000001131	0	0	0.861106	25.7435	63.072	9.24517	8.246	9.39062	23.0752	0	2.05898	0
Uxt	ENSMUSG00000001134	11.0971	0	71.4718	27.4043	41.2971	21.8522	35.4578	48.6605	17.5371	49.9924	50.4451	51.1502
Cnnm3	ENSMUSG00000001138	305.171	305.467	268.665	313.074	315.36	325.262	309.225	313.305	345.204	366.291	454.006	446.651
Lman2l	ENSMUSG00000001143	92.476	114.55	316.026	300.617	192.97	400.904	407.352	297.939	223.368	469.16	430.327	321.516
Mcm3ap	ENSMUSG00000001150	2922.24	1677.24	1232.24	631.13	762.12	849.715	578.045	1074.8	997.77	1129.64	737.116	825.711
Pcnt	ENSMUSG00000001151	7784.63	3872.08	3336.79	1559.56	1795.3	2729.85	1838.86	2594.37	2568.73	3582.15	2383.27	2535.59
Ftcd	ENSMUSG00000001155	0	1.4142	10.3333	1.66087	0	22.6927	1.6492	4.26846	3.69203	2.88418	5.14746	0.913397
Mxd1	ENSMUSG00000001156	9.2476	103.237	224.749	69.7565	99.1131	189.946	77.5124	51.2216	90.4546	70.1817	82.3593	75.812
Gmcl1	ENSMUSG00000001157	11.0971	282.84	104.194	129.548	126.895	165.573	117.093	132.322	183.678	127.865	136.922	93.1665
Snrnp27	ENSMUSG00000001158	201.598	195.16	40.472	67.2652	62.3211	49.5877	74.214	78.5397	55.3804	100.946	60.74	64.8512
Oas1c	ENSMUSG00000001166	0	1.4142	0	5.81304	2.25257	0.84047	0	0	0	3.84557	0	6.39378
Oas1h	ENSMUSG00000001168	0	0	0	0	0	0	0	0	0	0	0	0
Ocrl	ENSMUSG00000001173	449.433	363.45	325.498	256.604	379.934	479.068	264.697	186.959	264.903	189.394	218.252	267.625
NA	ENSMUSG00000001175	349.559	172.533	153.277	316.396	201.23	244.577	213.571	228.79	140.297	167.282	316.054	288.633
Agpat3	ENSMUSG00000001211	490.123	248.899	476.192	450.926	372.425	694.228	865.005	344.038	576.879	649.901	867.861	926.185
Slc26a3	ENSMUSG00000001225	1.84952	0	6.02775	0	0	0.84047	2.4738	0	1.84601	0	4.11796	1.82679
Sema6b	ENSMUSG00000001227	101.724	96.1657	92.1384	27.4043	6.00685	47.9068	48.6514	42.6846	42.4583	69.2203	17.5014	52.977
Uhrf1	ENSMUSG00000001228	5.54856	83.4379	60.2775	37.3695	64.5737	52.1091	15.6674	58.0511	43.3813	53.838	31.9142	27.4019
Dpp9	ENSMUSG00000001229	1242.88	704.272	493.414	214.252	389.695	475.706	231.713	239.888	238.136	221.12	113.244	143.403
Ramp2	ENSMUSG00000001240	0	5.65681	12.9166	18.2696	21.7748	8.4047	0	20.4886	11.9991	8.65253	33.9732	10.0474
Lsr	ENSMUSG00000001247	3.69904	22.6272	58.5552	83.0434	44.3006	61.3543	32.984	40.1236	49.8424	120.174	106.038	107.781
Gramd1a	ENSMUSG00000001248	6637.92	5143.45	2377.52	823.791	1211.88	2574.36	523.621	980.893	1184.22	1098.87	693.877	576.354
Hpn	ENSMUSG00000001249	11.0971	22.6272	37.0276	18.2696	54.8125	29.4164	4.123	16.2202	20.3061	44.2241	19.5603	33.7957
Gabrg1	ENSMUSG00000001260	0	0	0	0	0	0	0	0	0	0	0	0
Ckb	ENSMUSG00000001270	7.39808	73.5385	6.02775	61.4521	30.7851	53.7901	11.5444	87.0767	57.2264	43.2627	40.1502	35.6225
Sp1	ENSMUSG00000001280	712.065	377.592	514.081	372.865	510.583	499.239	302.628	489.166	494.732	376.866	329.437	433.864
Itgb7	ENSMUSG00000001281	44.3885	117.379	54.2497	34.8782	73.584	5.04282	24.738	42.6846	47.0733	26.919	55.5925	51.1502
Myg1	ENSMUSG00000001285	3.69904	56.5681	61.9997	82.213	75.8365	95.8135	141.007	80.2471	49.8424	115.367	106.038	92.2531
Rarg	ENSMUSG00000001288	36.9904	125.864	80.944	28.2348	25.5291	42.8639	72.5648	20.4886	24.9212	8.65253	40.1502	17.3545
Pfdn5	ENSMUSG00000001289	92.476	14.142	35.3054	88.026	77.3383	25.2141	91.5306	73.4176	86.7626	29.8032	38.0912	45.6699
Efnb2	ENSMUSG00000001300	762.002	337.994	133.472	64.7739	48.8057	115.144	37.107	112.687	117.222	43.2627	56.622	88.5995
Rrp15	ENSMUSG00000001305	40.6894	70.7101	70.6107	60.6217	69.0788	75.6423	115.444	45.2457	56.3034	61.5291	37.0617	31.0555
Rnd2	ENSMUSG00000001313	0	1.4142	1.72221	3.32174	23.2766	0	0	1.70739	1.84601	2.88418	1.02949	0.913397
Srr	ENSMUSG00000001323	105.423	125.864	65.4441	98.8217	95.3588	149.604	308.4	148.543	140.297	96.1393	189.426	232.003
Sync	ENSMUSG00000001333	1880.96	1047.92	933.439	308.922	261.298	315.176	420.546	494.288	287.978	256.692	362.381	322.429
Fndc5	ENSMUSG00000001334	225.641	127.278	167.916	214.252	206.486	211.798	409.826	350.014	198.446	442.241	518.864	518.81
Acp5	ENSMUSG00000001348	0	0	0.861106	0	3.75428	0	4.123	9.39062	0.923007	0	0	0.913397
Cnn1	ENSMUSG00000001349	5.54856	19.7988	40.472	29.0652	51.0583	29.4164	3.2984	18.7812	15.6911	6.72975	39.1207	10.0474
Fbxo9	ENSMUSG00000001366	188.651	212.13	144.666	339.648	325.872	284.919	550.833	525.021	442.12	407.63	531.217	501.455
Ccdc132	ENSMUSG00000001376	22.1942	93.3373	277.276	221.726	165.189	256.343	234.186	212.57	285.209	117.29	154.424	259.405
Hars	ENSMUSG00000001380	36.9904	124.45	74.0552	66.4348	127.646	16.8094	125.339	70.0028	102.454	35.5715	61.7695	70.3316
Zmat2	ENSMUSG00000001383	109.122	60.8107	16.361	93.8391	95.3588	70.5994	48.6514	46.0994	69.2255	72.1044	57.6515	122.395
Ube2c	ENSMUSG00000001403	1.84952	0	0	2.4913	12.0137	2.52141	0	5.97585	7.38405	0.961393	7.20644	1.82679
Smg5	ENSMUSG00000001415	2359.99	670.331	1401.02	731.613	786.147	590.01	782.545	940.769	779.018	938.319	562.102	644.858
Cct3	ENSMUSG00000001416	73.9808	113.136	278.999	333.835	301.094	147.082	176.464	404.65	209.523	281.688	216.193	218.302
Rhbg	ENSMUSG00000001417	0	0	0	0	0	0	0	0	0.923007	0	5.14746	0.913397
Glmp	ENSMUSG00000001418	140.563	67.8817	156.721	64.7739	69.0788	63.0352	109.672	96.4673	53.5344	113.444	107.067	106.867
Mef2d	ENSMUSG00000001419	13057.6	13262.4	7625.1	6126.11	8285.71	4518.36	3374.26	5835.84	6856.09	4459.9	4267.24	4142.26
Tmem79	ENSMUSG00000001420	0	0	0	0	0	0.84047	0	0	0	1.92279	0	0
Snd1	ENSMUSG00000001424	1366.79	1093.18	1223.63	1049.67	1264.44	1429.64	1193.2	1144.8	1086.38	1146.94	976.987	985.555
Col18a1	ENSMUSG00000001435	79.5293	31.1124	59.4163	14.1174	63.8228	42.8639	14.8428	30.7329	40.6123	10.5753	11.3244	3.65359
Slc19a1	ENSMUSG00000001436	1.84952	32.5266	21.5277	31.5565	57.816	18.4903	50.3006	8.53693	20.3061	6.72975	45.2976	16.4411
Kpnb1	ENSMUSG00000001440	340.312	394.562	467.581	396.117	320.616	484.951	462.601	259.523	341.512	224.004	361.351	259.405
Npepps	ENSMUSG00000001441	264.481	514.769	363.387	659.365	554.883	442.927	620.924	545.51	590.724	352.831	614.606	435.69
Tbx21	ENSMUSG00000001444	0	0	0.861106	0	0	0	0.8246	3.41477	0	0	0	0.913397
Mrpl10	ENSMUSG00000001445	40.6894	11.3136	84.3884	70.5869	81.8434	47.9068	89.8814	61.4659	80.3016	200.931	77.2118	102.3
Cyp51	ENSMUSG00000001467	0	7.07101	18.9443	73.0782	39.7954	32.7783	128.638	23.0497	28.6132	57.6836	66.9169	67.5914
Tcf25	ENSMUSG00000001472	3571.42	4837.98	3520.2	1892.56	3080.01	2716.4	1633.53	2043.74	2406.28	1479.58	1524.68	1521.72
Tubb6	ENSMUSG00000001473	149.811	223.444	66.3052	131.209	134.403	164.732	176.464	107.565	160.603	161.514	84.4183	98.6469
Def8	ENSMUSG00000001482	614.04	263.041	185.138	153.63	162.936	211.798	310.874	154.518	227.983	218.236	271.786	239.31
Meox1	ENSMUSG00000001493	136.864	60.8107	12.9166	30.7261	33.0377	68.078	41.23	64.8807	61.8414	12.4981	8.23593	1.82679
Sost	ENSMUSG00000001494	0	0	0	0	0	0	0	0.853693	0	0	0	0
Nkx2-1	ENSMUSG00000001496	16.6457	1.4142	0	0	0	0.84047	0	0.853693	0	0	0	0
Pax9	ENSMUSG00000001497	0	1.4142	0	0.830434	0.750857	2.52141	0.8246	0.853693	0	0.961393	2.05898	0
Irx2	ENSMUSG00000001504	27.7428	29.6982	28.4165	30.7261	36.792	21.8522	10.7198	21.3423	7.38405	31.726	44.2681	20.0947
Col1a1	ENSMUSG00000001506	3591.77	2682.74	1247.74	2175.74	1204.37	1001	600.309	1101.26	1142.68	117.29	219.282	136.096
Itga3	ENSMUSG00000001507	1265.07	562.852	536.469	363.73	440.753	465.62	126.988	186.959	419.968	186.51	160.601	146.144
Sgca	ENSMUSG00000001508	147.962	284.254	361.665	724.139	642.733	584.126	921.903	965.527	607.338	984.466	983.164	996.516
Dlx3	ENSMUSG00000001510	0	1.4142	0	1.66087	0	0.84047	0	0	0.923007	0.961393	0	0.913397
Foxm1	ENSMUSG00000001517	40.6894	120.207	22.3888	26.5739	2.25257	23.5331	58.5466	14.5128	20.3061	0	1.02949	27.4019
Itfg2	ENSMUSG00000001518	201.598	196.574	241.11	232.522	232.766	246.258	375.193	212.57	357.204	399.939	249.137	254.838
Nrip2	ENSMUSG00000001520	35.1409	90.5089	213.554	74.7391	60.0685	209.277	277.89	89.6377	89.5316	215.352	241.93	147.057
Tulp3	ENSMUSG00000001521	1080.12	397.391	426.248	307.261	459.524	389.978	332.314	298.792	349.82	283.611	199.721	241.137
Gtf2h4	ENSMUSG00000001524	40.6894	35.355	101.611	20.7609	38.2937	73.9613	98.1274	51.2216	50.7654	44.2241	58.681	78.5521
Tubb5	ENSMUSG00000001525	133.165	97.5799	207.527	113.77	202.731	205.075	152.551	146.835	179.063	138.441	120.45	108.694
Ell2	ENSMUSG00000001542	747.206	630.734	674.246	644.417	753.86	519.41	457.653	661.612	820.553	337.449	211.046	284.066
Jup	ENSMUSG00000001552	1394.54	2596.47	2075.27	999.013	1868.88	1237.17	746.263	883.572	1450.04	931.589	1017.14	1050.41
Fkbp10	ENSMUSG00000001555	9.2476	4.2426	55.9719	22.4217	35.2903	20.1713	52.7744	24.7571	4.61503	16.3437	5.14746	20.0947
Klhl10	ENSMUSG00000001558	1.84952	2.8284	12.9166	11.6261	9.01028	9.24517	34.6332	26.4645	6.46105	34.6101	6.17695	10.9608
Mnx1	ENSMUSG00000001566	0	0	0.861106	0	0	0	0	0	0	0	0	0
Nom1	ENSMUSG00000001569	203.447	214.959	118.833	314.735	286.827	142.88	169.043	261.23	289.824	293.225	290.317	260.318
Ergic1	ENSMUSG00000001576	1566.54	681.645	209.249	269.891	296.588	347.114	326.542	227.082	319.36	203.815	288.258	170.805
Tnk1	ENSMUSG00000001583	5.54856	8.48521	4.30553	6.64348	1.50171	5.04282	6.5968	18.7812	1.84601	4.80696	5.14746	0.913397
Acap1	ENSMUSG00000001588	0	14.142	0	1.66087	2.25257	5.04282	2.4738	13.6591	3.69203	0	4.11796	1.82679
Tcea3	ENSMUSG00000001604	133.165	115.965	182.555	213.422	195.974	146.242	144.305	216.838	240.905	309.568	313.995	290.46
Csn3	ENSMUSG00000001622	5.54856	0	0	0.830434	1.50171	4.20235	4.123	5.12216	6.46105	2.88418	6.17695	1.82679
Ifrd1	ENSMUSG00000001627	35.1409	185.26	217.86	790.574	575.907	468.142	1048.89	711.126	696.87	607.6	912.129	949.02
Stk38l	ENSMUSG00000001630	340.312	429.917	748.302	724.139	904.032	451.332	277.89	414.895	482.732	206.699	149.276	145.23
Brpf1	ENSMUSG00000001632	4496.18	2447.98	1420.83	460.891	529.354	985.871	537.639	601.853	683.025	523.959	366.499	477.707
Akr1b3	ENSMUSG00000001642	242.287	48.0828	51.6664	161.104	156.929	290.802	237.485	226.229	254.75	280.727	421.062	404.635
Hoxc13	ENSMUSG00000001655	0	0	0.861106	0	0	0	0	0	3.69203	0	0	0
Hoxc11	ENSMUSG00000001656	0	0	0	0	0	0	0	4.26846	0	0	0	0
Hoxc8	ENSMUSG00000001657	0	4.2426	2.58332	5.81304	3.00343	0	2.4738	5.12216	0.923007	2.88418	1.02949	2.74019
Hoxc6	ENSMUSG00000001661	0	1.4142	0	0	0	0.84047	0.8246	0	0.923007	0.961393	0	1.82679
Gstt1	ENSMUSG00000001663	0	4.2426	0	4.98261	2.25257	11.7666	7.4214	9.39062	5.53804	1.92279	10.2949	7.30718
Gstt3	ENSMUSG00000001665	1.84952	21.213	2.58332	3.32174	2.25257	1.68094	9.0706	3.41477	1.84601	16.3437	4.11796	17.3545
Ddt	ENSMUSG00000001666	0	1.4142	0	3.32174	0	8.4047	5.7722	11.098	0.923007	2.88418	8.23593	3.65359
Tat	ENSMUSG00000001670	0	0	0	0	0	0	0	0	0	0	0	0
Marveld3	ENSMUSG00000001672	0	1.4142	0.861106	0.830434	0	0	0	3.41477	0	0	0	0
Ddx18	ENSMUSG00000001674	301.472	171.118	269.526	124.565	111.127	103.378	79.9862	168.177	149.527	149.977	112.215	116.001
Ubl3	ENSMUSG00000001687	14.7962	77.7811	34.4443	58.9608	105.871	116.825	101.426	73.4176	126.452	94.2165	79.2708	72.1584
Gramd3	ENSMUSG00000001700	321.816	43.8402	147.249	142.004	174.199	150.444	195.43	263.791	216.907	168.244	169.866	145.23
Eef1e1	ENSMUSG00000001707	59.1846	5.65681	68.8885	3.32174	2.25257	15.9689	2.4738	4.26846	7.38405	13.4595	6.17695	7.30718
Akt1	ENSMUSG00000001729	340.312	494.97	576.941	184.356	249.284	304.25	230.063	147.689	167.987	230.734	285.169	153.451
Cldn15	ENSMUSG00000001739	7.39808	5.65681	1.72221	4.15217	2.25257	7.56423	0.8246	11.098	2.76902	7.69114	13.3834	8.22057
Il16	ENSMUSG00000001741	103.573	257.385	103.333	34.0478	45.0514	132.794	44.5284	29.8792	62.7644	70.1817	70.0054	38.3627
Tcirg1	ENSMUSG00000001750	122.068	356.379	140.36	79.7217	71.3314	180.701	32.1594	111.834	138.451	34.6101	60.74	25.5751
Naglu	ENSMUSG00000001751	125.767	124.45	200.638	79.7217	139.659	132.794	75.8632	135.737	96.9157	105.753	143.099	157.104
Coasy	ENSMUSG00000001755	131.316	46.6686	360.804	146.987	132.902	142.88	56.0728	164.763	179.063	159.591	186.338	84.0325
Smo	ENSMUSG00000001761	417.991	159.805	86.9718	193.491	341.64	183.222	75.0386	149.396	226.137	203.815	230.606	232.916
Tspan33	ENSMUSG00000001763	11.0971	7.07101	21.5277	11.6261	17.2697	10.9261	16.492	14.5128	16.6141	16.3437	15.4424	17.3545
Crnkl1	ENSMUSG00000001767	155.36	247.485	216.999	478.33	362.664	238.693	341.384	443.067	455.965	431.665	384	439.344
Rin2	ENSMUSG00000001768	49.937	312.538	359.943	58.9608	101.366	79.0041	61.0204	63.1733	102.454	76.9114	119.421	76.7254
Folh1	ENSMUSG00000001773	0	0	0	0	0	0	0	0	0	0	1.02949	0
Chordc1	ENSMUSG00000001774	44.3885	9.89941	69.7496	206.778	117.885	80.6851	150.077	198.91	129.221	114.406	79.2708	99.5603
Rtcb	ENSMUSG00000001783	101.724	43.8402	80.0829	117.922	100.615	115.144	225.116	111.834	87.6856	93.2551	197.662	75.812
Pwp1	ENSMUSG00000001785	31.4418	12.7278	25.8332	63.113	86.3485	43.7044	86.583	49.5142	54.4574	68.2589	85.4478	80.3789
Fbxo7	ENSMUSG00000001786	18.4952	22.6272	37.8887	94.6695	33.7886	74.8018	154.2	52.0753	85.8396	91.3323	112.215	136.096
Capns1	ENSMUSG00000001794	578.9	480.828	334.97	901.852	864.236	437.044	650.609	799.91	855.627	798.917	885.362	772.734
Lrp3	ENSMUSG00000001802	271.879	815.994	310.859	69.7565	64.5737	110.942	80.8108	60.6122	73.8405	68.2589	95.7427	83.1191
Dsg4	ENSMUSG00000001804	0	0	0	0	0	1.68094	0	0	0	0	1.02949	0
Evx2	ENSMUSG00000001815	0	0	0	0	0	0	0	0	0	0	0	0
Hoxd13	ENSMUSG00000001819	0	0	0	0	0	0	0	0	0	0	0	0
Hoxd12	ENSMUSG00000001823	0	1.4142	0	0	0	0	0	0	0	0	0	0
Folr1	ENSMUSG00000001827	0	0	0	2.4913	0	0	0	0	0	1.92279	0	0.913397
Clpb	ENSMUSG00000001829	107.272	87.6805	257.471	263.248	239.523	141.199	343.034	253.547	314.745	227.85	250.166	247.531
39326	ENSMUSG00000001833	125.767	176.775	76.6385	235.843	298.841	63.8757	166.569	185.251	231.675	140.363	138.981	163.498
Zdhhc4	ENSMUSG00000001844	129.466	19.7988	372.859	75.5695	58.5668	160.53	151.726	93.0525	83.0706	138.441	121.48	105.954
Rac1	ENSMUSG00000001847	129.466	86.2663	179.11	233.352	202.731	153.806	237.485	121.224	191.062	152.861	144.129	142.49
Nup214	ENSMUSG00000001855	1773.69	1508.95	1864.3	1094.51	1190.86	1077.48	1152.79	1038.94	1345.74	1254.62	1000.67	1064.11
Aif1l	ENSMUSG00000001864	0	16.9704	9.47217	3.32174	3.00343	3.36188	12.369	2.56108	0.923007	2.88418	2.05898	4.56699
Cpa3	ENSMUSG00000001865	3.69904	0	0	4.15217	0	0.84047	0	0.853693	0	0	0	0
Ltbp1	ENSMUSG00000001870	429.088	489.314	830.968	440.961	434.746	452.173	523.621	342.331	441.197	766.23	547.689	759.946
Ugp2	ENSMUSG00000001891	35.1409	108.893	133.472	564.695	233.516	168.934	618.45	694.906	236.29	425.897	679.464	664.953
Kcnh6	ENSMUSG00000001901	0	1.4142	0	0	0	2.52141	0	0	0	6.72975	0	0
Trmt1	ENSMUSG00000001909	2574.53	428.503	478.775	420.2	395.702	349.635	416.423	381.601	363.665	302.839	301.641	409.202
Nacc1	ENSMUSG00000001910	257.083	268.698	103.333	252.452	221.503	314.336	140.182	193.788	173.525	191.317	134.863	210.995
Nfix	ENSMUSG00000001911	1218.83	1269.95	1186.6	818.808	767.376	993.435	538.464	749.542	977.464	845.064	831.829	719.757
Slc1a5	ENSMUSG00000001918	16.6457	83.4379	92.1384	46.5043	3.75428	88.2493	40.4054	29.0256	53.5344	26.919	55.5925	60.2842
Uba1	ENSMUSG00000001924	1074.57	616.592	805.996	491.617	743.348	511.006	771.001	567.706	656.258	389.364	378.853	443.911
Vwf	ENSMUSG00000001930	135.015	12.7278	185.138	25.7435	5.256	26.0546	39.5808	13.6591	17.5371	23.0734	36.0322	21.9215
Siae	ENSMUSG00000001942	1.84952	1.4142	0	23.2522	24.0274	4.20235	13.1936	27.3182	18.4601	6.72975	13.3834	7.30718
Vsig2	ENSMUSG00000001943	0	2.8284	0	0.830434	0.750857	0	4.9476	4.26846	7.38405	3.84557	3.08847	0
Esam	ENSMUSG00000001946	5.54856	2.8284	11.1944	5.81304	18.7714	15.1285	1.6492	13.6591	29.5362	11.5367	49.4156	31.9689
Spa17	ENSMUSG00000001948	31.4418	2.8284	0	9.13478	2.25257	3.36188	0	0	5.53804	0	6.17695	5.48038
Fam50a	ENSMUSG00000001962	541.909	622.249	47.3609	160.274	229.011	91.6112	93.1798	263.791	188.293	189.394	223.4	114.175
Emd	ENSMUSG00000001964	18.4952	8.48521	29.2776	44.8435	46.5531	56.3115	40.4054	55.49	67.3795	30.7646	48.3861	42.0163
Taco1	ENSMUSG00000001983	64.7332	42.426	1.72221	53.9782	28.5326	27.7355	63.4942	48.6605	38.7663	92.2937	47.3566	82.2057
Grik3	ENSMUSG00000001985	24.0437	62.2249	48.222	14.9478	8.25943	31.0974	10.7198	16.2202	5.53804	85.5639	13.3834	7.30718
Gria3	ENSMUSG00000001986	138.714	69.2959	32.722	37.3695	58.5668	89.0898	48.6514	61.4659	38.7663	33.6487	41.1796	8.22057
Npas1	ENSMUSG00000001988	0	0	0	3.32174	0.750857	20.1713	4.123	0	2.76902	0.961393	7.20644	0.913397
Sipa1l2	ENSMUSG00000001995	2406.22	3023.56	2324.13	923.443	832.7	1280.04	954.062	869.913	1005.15	676.82	627.99	713.363
Ap4e1	ENSMUSG00000001998	240.437	453.959	188.582	288.161	389.695	256.343	395.808	325.257	331.359	291.302	394.295	372.666
Blvra	ENSMUSG00000001999	0	14.142	0.861106	30.7261	13.5154	24.3736	21.4396	19.6349	44.3043	82.6798	8.23593	18.2679
Pdzd4	ENSMUSG00000002006	3.69904	14.142	53.3886	13.287	38.2937	81.5256	26.3872	40.9773	11.0761	73.0658	146.188	61.1976
Srpk3	ENSMUSG00000002007	1155.95	892.361	787.051	469.195	774.133	816.936	834.495	690.637	766.095	647.017	490.038	510.589
Idh3g	ENSMUSG00000002010	292.224	634.976	584.691	464.213	482.05	549.667	1018.38	653.075	564.88	662.399	548.719	548.038
Pnck	ENSMUSG00000002012	16.6457	2.8284	99.8884	21.5913	20.2731	23.5331	16.492	52.929	13.8451	42.3013	54.563	32.8823
Ssr4	ENSMUSG00000002014	90.6264	42.426	122.277	67.2652	94.608	174.818	206.975	89.6377	61.8414	61.5291	88.5362	78.5521
Bcap31	ENSMUSG00000002015	0	73.5385	79.2218	101.313	57.0651	55.471	75.0386	102.443	81.2246	99.0234	52.5041	63.9378
Fam98a	ENSMUSG00000002017	68.4322	70.7101	68.8885	192.661	218.499	181.541	183.061	243.302	247.366	200.931	261.491	207.341
Ltbp2	ENSMUSG00000002020	980.245	1933.21	537.33	376.187	342.391	483.27	50.3006	255.254	220.599	63.4519	39.1207	45.6699
Kmt2a	ENSMUSG00000002028	42581.5	33491.1	22379.3	10882	15633.6	12447.4	6765.84	12726.9	12725.5	9932.15	9556.77	9436.31
Ift46	ENSMUSG00000002031	112.821	254.556	421.942	117.091	204.984	263.907	167.394	207.447	341.512	206.699	156.483	183.593
Tmem25	ENSMUSG00000002032	146.112	84.8521	94.7217	111.278	112.629	308.452	335.612	188.666	214.138	193.24	178.102	141.577
Cd3g	ENSMUSG00000002033	0	0	0	0	0	0	0	0	0	0	0	0
Trappc6a	ENSMUSG00000002043	0	0	0	0.830434	7.50857	4.20235	6.5968	7.68323	11.9991	37.4943	31.9142	26.4885
Supt6	ENSMUSG00000002052	4514.68	1637.65	1354.52	1598.59	1583.56	1193.47	954.887	1383.84	1480.5	1477.66	1095.38	1164.58
Spag5	ENSMUSG00000002055	18.4952	87.6805	61.9997	14.1174	35.2903	12.607	14.8428	50.3679	24.9212	11.5367	8.23593	19.1813
Foxn1	ENSMUSG00000002057	247.836	46.6686	24.9721	1.66087	3.75428	0	9.8952	0	1.84601	0	4.11796	2.74019
Unc119	ENSMUSG00000002058	7.39808	22.6272	0	0	0.750857	1.68094	6.5968	10.2443	4.61503	0	12.3539	0
Rab34	ENSMUSG00000002059	138.714	226.272	11.1944	43.1826	104.369	65.5566	57.722	56.3437	65.5335	69.2203	32.9437	30.1421
Sdf2	ENSMUSG00000002064	59.1846	43.8402	179.11	50.6565	58.5668	26.0546	47.0022	74.2713	58.1494	70.1817	78.2413	62.111
Ccne1	ENSMUSG00000002068	0	5.65681	47.3609	6.64348	0.750857	1.68094	3.2984	9.39062	15.6911	0	1.02949	12.7876
Hsf2bp	ENSMUSG00000002076	22.1942	24.0414	18.0832	16.6087	8.25943	0.84047	10.7198	17.9275	14.7681	47.1082	14.4129	27.4019
Bbc3	ENSMUSG00000002083	203.447	137.178	23.2499	12.4565	8.25943	24.3736	0	9.39062	11.9991	2.88418	8.23593	1.82679
Mybpc3	ENSMUSG00000002100	71154.7	47873.5	38528.5	27886	25903.1	28995.4	21825.5	28845.4	22432.8	30224.3	19966	17524.4
Psmc3	ENSMUSG00000002102	782.347	733.97	513.219	410.235	387.442	309.293	180.587	374.771	256.596	274.958	222.37	264.885
Acp2	ENSMUSG00000002103	116.52	96.1657	135.194	133.7	212.492	294.164	331.489	267.206	202.138	216.313	326.349	209.168
Rapsn	ENSMUSG00000002104	18.4952	159.805	247.999	34.8782	18.0206	66.3971	120.392	85.3693	136.605	54.7994	98.8312	77.6388
Slc39a13	ENSMUSG00000002105	6560.24	6092.38	2356.85	1023.93	1609.84	922.836	357.052	762.348	1008.85	447.048	458.124	715.19
Celf2	ENSMUSG00000002107	1285.42	1818.66	2871.79	3077.59	3159.61	3541.74	2776.43	2861.58	2852.09	1810.3	1965.3	2365.7
Nr1h3	ENSMUSG00000002108	379.151	202.231	148.11	102.974	57.0651	105.899	50.3006	105.858	139.374	143.247	172.955	84.9459
Ddb2	ENSMUSG00000002109	62.8837	14.142	66.3052	64.7739	34.5394	180.701	81.6354	44.392	76.6095	93.2551	49.4156	48.41
Spi1	ENSMUSG00000002111	0	22.6272	0.861106	13.287	39.7954	124.389	0.8246	27.3182	4.61503	3.84557	12.3539	9.13397
Sf3a1	ENSMUSG00000002129	956.201	1699.87	349.609	303.939	420.48	625.309	601.958	477.214	395.97	562.415	397.384	533.424
Stat6	ENSMUSG00000002147	715.764	1295.41	835.273	661.026	921.301	476.546	357.876	550.632	684.871	547.032	622.842	556.259
Clgn	ENSMUSG00000002190	3.69904	0	1.72221	4.98261	0	3.36188	0	1.70739	1.84601	4.80696	0	0
Napsa	ENSMUSG00000002204	1.84952	1.4142	4.30553	0.830434	1.50171	1.68094	5.7722	5.12216	0	0.961393	5.14746	3.65359
Vrk3	ENSMUSG00000002205	340.312	166.876	77.4996	215.083	212.492	136.156	324.068	169.885	262.134	238.425	162.66	275.846
Smg9	ENSMUSG00000002210	623.288	452.544	275.554	222.556	225.257	286.6	119.567	272.328	244.597	232.657	207.957	188.16
Paxip1	ENSMUSG00000002221	3031.36	2310.8	1144.41	861.16	1323.01	920.314	742.14	1001.38	1138.07	972.929	778.295	798.309
Rmnd5a	ENSMUSG00000002222	36.9904	25.4556	111.083	103.804	149.421	206.756	146.779	101.589	125.529	101.908	232.665	219.215
Mov10	ENSMUSG00000002227	1899.46	898.018	663.913	700.887	811.676	532.858	718.227	744.42	963.619	971.968	780.354	617.456
Ppm1j	ENSMUSG00000002228	1013.54	951.757	403.859	194.322	219.25	261.386	220.993	118.663	149.527	154.784	194.574	188.16
Rhoc	ENSMUSG00000002233	190.5	72.1243	77.4996	91.3478	144.165	40.3425	29.6856	116.102	131.067	40.3785	72.0644	55.7172
Prr27	ENSMUSG00000002240	0	0	0	0	0	0	0	0	1.84601	0	0	0
Tead3	ENSMUSG00000002249	6031.28	5139.21	1833.3	903.513	1184.1	917.793	353.753	1079.92	1220.21	1105.6	857.566	765.427
NA	ENSMUSG00000002250	3782.27	1011.15	1158.19	479.991	614.201	646.321	206.975	523.314	523.345	838.334	801.974	723.41
Def6	ENSMUSG00000002257	0	8.48521	0	5.81304	0	5.88329	0	13.6591	5.53804	1.92279	4.11796	0
Peg3	ENSMUSG00000002265	7436.92	6880.09	3498.68	1283.85	1215.64	1711.2	371.07	1381.27	925.776	911.4	773.148	650.339
Zim1	ENSMUSG00000002266	192.35	260.213	68.8885	126.226	161.434	94.9731	85.7584	75.9787	89.5316	152.861	95.7427	94.0799
Metrn	ENSMUSG00000002274	0	1.4142	5.16664	0	0	0.84047	11.5444	0	0.923007	7.69114	0	0
Lmf1	ENSMUSG00000002279	606.642	739.627	825.801	533.139	509.081	958.135	914.481	617.22	693.178	1026.77	801.974	947.193
Narfl	ENSMUSG00000002280	319.967	316.781	136.916	199.304	301.094	222.724	162.446	372.21	246.443	256.692	213.105	234.743
Angptl4	ENSMUSG00000002289	103.573	29.6982	0	28.2348	53.3108	0.84047	0.8246	4.26846	49.8424	0	4.11796	9.13397
Dbf4	ENSMUSG00000002297	11.0971	5.65681	5.16664	14.1174	42.048	21.0117	3.2984	27.3182	7.38405	23.0734	21.6193	31.0555
Daxx	ENSMUSG00000002307	351.409	247.485	89.5551	53.9782	165.939	140.358	71.7402	132.322	132.913	97.1006	93.6837	54.8038
Cd320	ENSMUSG00000002308	0	0	51.6664	29.0652	59.3177	12.607	21.4396	44.392	23.0752	30.7646	38.0912	25.5751
Ipo4	ENSMUSG00000002319	1063.47	1008.33	719.885	428.504	824.441	535.379	224.291	390.138	460.58	366.291	230.606	294.114
Tm9sf1	ENSMUSG00000002320	107.272	115.965	170.499	150.309	104.369	177.339	133.585	172.446	113.53	124.981	158.542	121.482
Rec8	ENSMUSG00000002324	0	0	0	1.66087	0	4.20235	0	0.853693	6.46105	9.61393	0	0.913397
Irf9	ENSMUSG00000002325	1196.64	335.166	153.277	163.596	151.673	231.129	64.3188	167.324	167.064	182.665	146.188	208.255
Gmpr2	ENSMUSG00000002326	22.1942	45.2544	116.249	107.126	74.3348	30.2569	126.164	94.7599	85.8396	58.6449	62.799	95.9067
Mdp1	ENSMUSG00000002329	122.068	62.2249	74.0552	175.222	144.165	69.759	89.8814	108.419	121.837	148.054	112.215	69.4182
Dhrs1	ENSMUSG00000002332	1.84952	5.65681	42.1942	61.4521	60.0685	107.58	65.968	40.1236	55.3804	30.7646	44.2681	92.2531
Ncan	ENSMUSG00000002341	57.3351	22.6272	6.88885	7.47391	4.50514	7.56423	5.7722	4.26846	5.53804	10.5753	9.26542	5.48038
Tmem161a	ENSMUSG00000002342	229.34	288.497	421.942	267.4	192.97	188.265	202.852	235.619	240.905	240.348	208.987	328.823
Armc6	ENSMUSG00000002343	36.9904	21.213	40.472	36.5391	73.584	73.9613	51.1252	78.5397	50.7654	63.4519	67.9464	47.4966
NA	ENSMUSG00000002345	53.6361	29.6982	55.1108	48.1652	35.2903	31.9378	32.984	85.3693	86.7626	113.444	85.4478	81.2923
Slc25a42	ENSMUSG00000002346	595.545	1390.16	914.495	846.213	1037.68	1538.06	1762.99	1102.12	1282.98	1871.83	1965.3	1879.77
Snx9	ENSMUSG00000002365	331.064	271.527	304.832	257.435	293.585	177.339	98.1274	137.445	223.368	131.711	80.3003	101.387
Ranbp3	ENSMUSG00000002372	856.327	377.592	183.416	237.504	251.537	250.46	170.692	350.014	243.674	269.19	207.957	155.278
NA	ENSMUSG00000002379	155.36	138.592	212.693	91.3478	116.383	160.53	108.847	149.396	104.3	131.711	136.922	159.844
Bmp8b	ENSMUSG00000002384	0	0	0.861106	11.6261	0	5.88329	13.1936	4.26846	4.61503	0	7.20644	1.82679
Nr2f6	ENSMUSG00000002393	42.5389	28.284	4.30553	1.66087	33.7886	10.9261	13.1936	15.3665	10.1531	7.69114	9.26542	5.48038
Use1	ENSMUSG00000002395	534.511	666.089	294.498	156.122	255.291	200.032	179.763	316.72	237.213	249.001	189.426	207.341
Ocel1	ENSMUSG00000002396	231.19	140.006	203.221	190.169	122.39	274.834	217.694	175.861	147.681	135.556	153.394	168.978
Dyrk1b	ENSMUSG00000002409	1350.15	866.905	481.359	256.604	376.93	358.881	314.997	429.407	458.734	521.075	450.917	470.4
Braf	ENSMUSG00000002413	1784.79	1919.07	1503.49	1606.06	1620.35	1390.14	1299.57	1547.75	1702.02	1331.53	1121.12	1100.64
Ndufb2	ENSMUSG00000002416	103.573	21.213	99.8884	162.765	101.366	208.436	284.487	134.883	141.22	273.997	366.499	408.288
Hltf	ENSMUSG00000002428	88.7769	239	157.582	435.148	442.255	295.845	173.991	367.942	345.204	371.098	273.845	343.437
Prpf6	ENSMUSG00000002455	399.496	582.651	426.248	298.956	385.94	459.737	324.892	435.383	358.127	382.634	252.225	327.91
Rgs19	ENSMUSG00000002458	3.69904	15.5562	0	51.4869	16.5189	6.72376	3.2984	20.4886	10.1531	23.0734	11.3244	12.7876
Rgs20	ENSMUSG00000002459	38.8399	12.7278	17.2221	13.287	12.0137	30.2569	15.6674	8.53693	7.38405	15.3823	19.5603	31.0555
Abhd3	ENSMUSG00000002475	1.84952	0	6.02775	18.2696	2.25257	6.72376	89.0568	17.0739	8.30706	0	14.4129	18.2679
NA	ENSMUSG00000002477	25.8933	2.8284	15.4999	11.6261	9.76114	0.84047	0.8246	11.9517	10.1531	10.5753	4.11796	10.9608
Tchp	ENSMUSG00000002486	652.88	370.521	537.33	133.7	126.144	132.794	84.9338	150.25	129.221	98.062	70.0054	110.521
Tiam1	ENSMUSG00000002489	212.695	287.083	279.86	42.3522	83.3451	67.2376	79.1616	42.6846	44.3043	135.556	92.6542	64.8512
Tsc2	ENSMUSG00000002496	1893.91	721.243	1619.74	901.021	837.956	1081.68	1293.8	1114.92	904.546	990.234	846.242	675.914
Rpl3l	ENSMUSG00000002500	245.986	272.941	214.416	322.209	349.148	431.161	487.339	799.91	561.188	1637.25	1203.48	919.791
Slc9a3r2	ENSMUSG00000002504	144.262	15.5562	45.6386	86.3652	26.28	91.6112	38.7562	67.4417	96.9157	44.2241	109.126	63.9378
Puf60	ENSMUSG00000002524	201.598	335.166	61.1386	210.93	219.25	242.055	151.726	320.135	282.44	192.279	160.601	127.876
Golga2	ENSMUSG00000002546	2276.76	1769.17	497.72	646.908	677.273	574.881	422.195	629.172	623.029	689.318	533.276	506.022
Uck1	ENSMUSG00000002550	105.423	383.249	97.305	66.4348	46.5531	89.0898	121.216	75.125	47.9963	59.6063	65.8874	96.8201
Scin	ENSMUSG00000002565	11.0971	4.2426	2.58332	28.2348	6.75771	21.8522	9.8952	31.5866	23.9982	13.4595	26.7668	33.7957
Ikzf4	ENSMUSG00000002578	9.2476	14.142	20.6666	4.15217	25.5291	10.9261	5.7722	115.249	14.7681	12.4981	16.4719	10.9608
Mien1	ENSMUSG00000002580	0	142.834	0	0	6.00685	13.4475	0	6.82954	1.84601	1.92279	6.17695	0
Pon1	ENSMUSG00000002588	0	0	0	3.32174	0	0	0	0	0	0	0	0.913397
Axl	ENSMUSG00000002602	982.095	1176.62	328.943	210.1	192.219	396.702	217.694	189.52	174.448	105.753	185.308	130.616
Tgfb1	ENSMUSG00000002603	0	86.2663	336.693	39.8609	49.5566	84.047	12.369	26.4645	35.0743	12.4981	16.4719	38.3627
Ccdc97	ENSMUSG00000002608	1407.48	1011.15	483.942	511.548	452.016	530.336	302.628	544.656	527.96	644.133	603.282	701.489
Zfp40	ENSMUSG00000002617	20.3447	66.4675	67.1663	64.7739	96.8605	55.471	17.3166	56.3437	96.9157	25.9576	39.1207	30.1421
Akap8l	ENSMUSG00000002625	6131.16	4197.35	1329.55	1045.52	1304.99	963.178	572.272	1406.03	1490.66	1820.88	1052.14	1170.98
Shh	ENSMUSG00000002633	0	0	0	0	0	0	0	0	0	0	0	0
Pdcd2l	ENSMUSG00000002635	0	0	31.8609	31.5565	25.5291	26.895	47.0022	19.6349	61.8414	38.4557	38.0912	45.6699
Gtf2f1	ENSMUSG00000002658	4407.4	2146.76	242.832	279.026	330.377	271.472	96.4782	326.964	246.443	258.615	158.542	148.884
Clpp	ENSMUSG00000002660	49.937	104.651	43.0553	113.77	96.8605	66.3971	172.341	112.687	153.219	221.12	118.391	99.5603
Alkbh7	ENSMUSG00000002661	1.84952	0	6.02775	3.32174	14.2663	48.7472	51.9498	28.1719	22.1522	37.4943	50.4451	55.7172
Pspn	ENSMUSG00000002664	0	1.4142	0	1.66087	1.50171	21.0117	3.2984	10.2443	4.61503	12.4981	1.02949	14.6144
Dennd1c	ENSMUSG00000002668	7.39808	43.8402	9.47217	25.7435	9.01028	33.6188	1.6492	1.70739	11.0761	11.5367	4.11796	0
Med6	ENSMUSG00000002679	1.84952	31.1124	28.4165	76.4	47.304	26.0546	109.672	64.8807	68.3025	23.0734	60.74	30.1421
Prkd1	ENSMUSG00000002688	205.297	0	5.16664	21.5913	45.8023	10.0856	9.0706	65.7343	17.5371	13.4595	8.23593	17.3545
Lcp2	ENSMUSG00000002699	11.0971	141.42	4.30553	27.4043	24.7783	71.4399	13.1936	20.4886	52.6114	0.961393	22.6488	11.8742
Cse1l	ENSMUSG00000002718	282.976	53.7396	206.666	377.017	180.206	319.378	385.913	252.693	194.754	225.927	175.014	176.286
Naa20	ENSMUSG00000002728	62.8837	76.3669	87.8329	304.769	135.154	402.585	404.054	356.844	149.527	146.132	353.115	425.643
Prkra	ENSMUSG00000002731	0	29.6982	2.58332	19.1	60.8194	35.2997	68.4418	37.5625	52.6114	17.3051	25.7373	15.5278
Fkbp7	ENSMUSG00000002732	0	2.8284	2.58332	1.66087	0	0	16.492	7.68323	5.53804	7.69114	24.7078	4.56699
Plekha3	ENSMUSG00000002733	305.171	255.97	132.61	177.713	102.117	115.144	145.954	107.565	164.295	103.83	114.274	135.183
Ykt6	ENSMUSG00000002741	29.5923	18.3846	26.6943	102.974	40.5463	65.5566	117.093	59.7585	50.7654	52.8766	40.1502	45.6699
Baz1b	ENSMUSG00000002748	9391.86	8387.63	4555.25	3624.02	3669.44	3497.19	2265.18	4956.54	3772.33	5479.94	3646.46	3745.84
Pex6	ENSMUSG00000002763	88.7769	121.621	89.5551	122.904	94.608	134.475	211.922	99.8821	133.836	184.587	240.901	287.72
Mrpl2	ENSMUSG00000002767	46.238	31.1124	10.3333	58.9608	11.2629	47.0663	63.4942	47.8068	59.0724	46.1468	77.2118	43.8431
Mea1	ENSMUSG00000002768	149.811	28.284	18.0832	30.7261	79.5908	28.576	12.369	41.8309	14.7681	70.1817	26.7668	31.0555
Gnmt	ENSMUSG00000002769	0	0	0	0	0	11.7666	1.6492	0	0.923007	2.88418	7.20644	13.701
Grin2d	ENSMUSG00000002771	430.938	977.213	88.694	97.9913	107.373	87.4088	41.23	81.9545	71.0715	68.2589	30.8847	49.3234
Kdelr1	ENSMUSG00000002778	90.6264	11.3136	37.0276	53.9782	81.8434	86.5684	91.5306	58.9048	73.8405	82.6798	74.1234	92.2531
Tmem143	ENSMUSG00000002781	147.962	196.574	263.499	170.239	164.438	279.876	480.742	309.89	174.448	441.279	455.035	369.926
Pdxk-ps	ENSMUSG00000002791	0	12.7278	5.16664	0.830434	2.25257	72.2804	1.6492	0	0.923007	1.92279	6.17695	5.48038
Ggct	ENSMUSG00000002797	11.0971	43.8402	2.58332	35.7087	93.8571	83.2065	88.2322	35.8551	33.2282	51.9152	128.686	159.844
Jag2	ENSMUSG00000002799	253.384	130.107	198.916	65.6043	131.4	284.919	141.007	81.9545	187.37	57.6836	89.5657	40.1895
Btbd6	ENSMUSG00000002803	146.112	332.337	179.971	88.8565	169.694	189.106	206.15	171.592	193.831	271.113	198.692	194.554
Nudt14	ENSMUSG00000002804	0	0	0	0	8.25943	1.68094	1.6492	0.853693	1.84601	0	0	0.913397
Epdr1	ENSMUSG00000002808	16.6457	5.65681	31.8609	24.913	72.0823	58.8329	14.8428	36.7088	20.3061	29.8032	63.8285	68.5048
Flii	ENSMUSG00000002812	4764.36	3452.07	2320.68	1405.1	1939.46	1349.79	869.128	1324.08	1318.05	1235.39	780.354	936.232
Top3a	ENSMUSG00000002814	131.316	107.479	143.805	62.2826	97.6114	91.6112	61.845	45.2457	47.0733	64.4133	41.1796	33.7957
Atg4d	ENSMUSG00000002820	51.7865	46.6686	110.222	78.8913	65.3245	191.627	107.198	71.7102	88.6086	99.9848	89.5657	57.544
Qtrt1	ENSMUSG00000002825	612.191	461.03	173.944	376.187	549.627	164.732	188.009	331.233	342.435	478.773	228.547	266.712
Plin4	ENSMUSG00000002831	36363.4	19435.4	11093.6	5966.67	7538.6	7078.43	4057.86	7834.34	7085	11662.7	7614.12	8303.69
Hdgfrp2	ENSMUSG00000002833	5565.2	3187.61	794.801	609.539	626.965	568.157	301.804	749.542	736.559	822.952	644.461	485.927
Chaf1a	ENSMUSG00000002835	44.3885	111.722	30.1387	2.4913	3.00343	16.8094	1.6492	1.70739	23.0752	4.80696	0	0.913397
Adprh	ENSMUSG00000002844	18.4952	43.8402	22.3888	48.1652	39.0446	70.5994	10.7198	44.392	23.9982	72.1044	44.2681	29.2287
Tmem39a	ENSMUSG00000002845	101.724	57.9823	130.888	187.678	447.511	185.744	393.334	256.108	239.982	120.174	207.957	154.364
Timmdc1	ENSMUSG00000002846	580.749	80.6095	315.165	274.043	141.161	180.701	237.485	209.155	163.372	240.348	197.662	163.498
Pla1a	ENSMUSG00000002847	220.093	0	14.6388	5.81304	6.00685	20.1713	39.5808	13.6591	10.1531	7.69114	9.26542	13.701
Mcm2	ENSMUSG00000002870	33.2913	26.8698	0	1.66087	3.00343	4.20235	0	3.41477	5.53804	0.961393	0	2.74019
Tpra1	ENSMUSG00000002871	697.269	67.8817	132.61	119.583	155.427	144.561	63.4942	115.249	114.453	114.406	127.657	82.2057
Nab1	ENSMUSG00000002881	242.287	55.1539	39.6109	173.561	177.953	182.382	122.041	145.128	142.143	86.5253	107.067	82.2057
Cd97	ENSMUSG00000002885	355.108	704.272	333.248	440.13	518.091	311.814	243.257	309.89	347.05	247.078	269.727	210.995
Il17ra	ENSMUSG00000002897	610.341	172.533	432.275	145.326	216.247	102.537	12.369	78.5397	112.607	12.4981	31.9142	21.9215
Lamb1	ENSMUSG00000002900	14.7962	130.107	38.7498	114.6	104.369	103.378	259.749	109.273	209.523	200.931	212.075	280.413
Kcnn1	ENSMUSG00000002908	25.8933	57.9823	17.2221	42.3522	78.84	57.1519	35.4578	27.3182	48.9194	55.7608	21.6193	32.8823
Arrdc2	ENSMUSG00000002910	160.908	53.7396	75.7774	54.8087	46.5531	126.07	24.738	75.125	70.1485	65.3747	38.0912	68.5048
Ppp1r17	ENSMUSG00000002930	5.54856	0	0	0	0	0	0	0	6.46105	0.961393	1.02949	0
Cd36	ENSMUSG00000002944	702.817	544.467	750.885	1455.75	1120.28	877.45	2242.09	1553.72	1672.49	1295.96	1595.71	1734.54
Map2k7	ENSMUSG00000002948	2139.89	838.621	604.497	517.361	429.49	853.917	914.481	636.001	630.414	815.261	702.113	864.074
Timm44	ENSMUSG00000002949	1662.72	1395.82	1384.66	1393.47	1194.61	1174.14	996.941	1295.05	1421.43	1196.93	886.392	891.476
Ap2a2	ENSMUSG00000002957	120.219	110.308	148.11	243.317	238.772	150.444	159.148	228.79	193.831	150.939	142.07	177.199
Pnkp	ENSMUSG00000002963	51.7865	114.55	49.9442	33.2174	32.2868	44.5449	4.9476	75.9787	73.8405	25.9576	35.0027	33.7957
Med25	ENSMUSG00000002968	3482.64	3469.04	1064.33	323.039	415.224	648.002	243.257	508.801	308.284	538.38	312.965	328.823
Bcam	ENSMUSG00000002980	491.972	668.917	948.078	546.426	473.04	482.43	609.379	640.27	631.337	564.337	715.496	472.226
Clptm1	ENSMUSG00000002981	303.321	366.278	373.72	278.196	295.087	177.339	236.66	252.693	218.753	207.661	361.351	225.609
Relb	ENSMUSG00000002983	66.5827	55.1539	120.555	85.5347	100.615	55.471	70.091	70.0028	89.5316	64.4133	40.1502	91.3397
Tomm40	ENSMUSG00000002984	634.385	306.882	1112.55	572.169	635.225	574.041	564.851	609.537	434.736	679.705	651.668	436.604
Apoe	ENSMUSG00000002985	68.4322	29.6982	88.694	145.326	81.8434	91.6112	130.287	108.419	80.3016	186.51	221.341	234.743
Apoc2	ENSMUSG00000002992	0	0	0	0	0	0	0	0	0	0	0	0
Hbp1	ENSMUSG00000002996	83.2284	67.8817	156.721	430.165	399.456	309.293	581.343	424.285	409.815	502.808	828.74	795.569
Prkar2b	ENSMUSG00000002997	0	31.1124	0.861106	0.830434	15.0171	35.2997	4.123	0.853693	5.53804	5.76836	18.5308	3.65359
Cdkn1b	ENSMUSG00000003031	75.8303	137.178	273.832	97.9913	97.6114	144.561	206.975	114.395	97.8387	197.085	99.8606	104.127
Klf4	ENSMUSG00000003032	153.51	117.379	52.5275	49.8261	49.5566	68.078	48.6514	33.294	54.4574	36.5329	35.0027	84.9459
Ap1m1	ENSMUSG00000003033	1548.05	1282.68	588.997	548.917	420.48	455.535	498.883	461.848	502.116	571.067	449.888	425.643
Rab8a	ENSMUSG00000003037	7.39808	33.9408	222.165	97.9913	78.84	164.732	70.9156	98.1747	123.683	103.83	119.421	105.041
NA	ENSMUSG00000003038	22.1942	19.7988	40.472	62.2826	13.5154	23.5331	76.6878	53.7826	55.3804	32.6873	39.1207	32.8823
Fam32a	ENSMUSG00000003039	133.165	96.1657	23.2499	71.4174	37.5428	53.7901	33.8086	41.8309	34.1512	72.1044	28.8258	52.0636
Elf3	ENSMUSG00000003051	0	0	0	0	0	0	0.8246	0	0	0	0	0
Cyp2c29	ENSMUSG00000003053	0	0	0.861106	0	0	0	0	0	0	0	0	0.913397
Stard3nl	ENSMUSG00000003062	0	0	9.47217	8.30434	4.50514	34.4593	19.7904	2.56108	15.6911	6.72975	12.3539	34.7091
Stk11	ENSMUSG00000003068	364.355	179.604	425.387	320.548	231.264	310.974	152.551	409.773	203.984	316.298	323.26	221.955
Efna2	ENSMUSG00000003070	0	0	0.861106	0	0	0	0	0.853693	0	1.92279	0	0
Atp5d	ENSMUSG00000003072	318.117	441.231	414.192	553.9	608.194	410.149	700.085	735.029	647.951	830.643	675.346	658.559
Ppp5c	ENSMUSG00000003099	688.021	421.432	324.637	284.009	168.192	412.671	368.596	283.426	298.131	398.978	313.995	253.011
Cdk12	ENSMUSG00000003119	4061.54	2480.51	2641.87	2561.89	3113.05	2468.46	2736.02	2750.6	2829.94	2763.04	2594.32	2067.93
Lipe	ENSMUSG00000003123	192.35	231.929	117.11	116.261	113.379	260.546	114.619	97.321	236.29	97.1006	189.426	334.303
Pafah1b2	ENSMUSG00000003131	92.476	48.0828	117.972	133.7	70.5805	121.028	196.255	99.0284	147.681	103.83	158.542	210.081
Tbc1d8	ENSMUSG00000003134	31.4418	24.0414	42.1942	142.835	152.424	108.421	112.97	155.372	125.529	141.325	72.0644	104.127
Cnot11	ENSMUSG00000003135	186.801	84.8521	204.943	78.8913	56.3143	50.4282	144.305	115.249	63.6875	88.4481	82.3593	73.0718
Slc2a3	ENSMUSG00000003153	7.39808	11.3136	15.4999	23.2522	27.7817	29.4164	14.8428	13.6591	24.9212	24.9962	25.7373	31.0555
Foxj2	ENSMUSG00000003154	2298.95	3693.89	1549.99	693.413	1085.74	558.912	514.55	739.298	894.393	1096.95	890.51	807.443
Sri	ENSMUSG00000003161	166.457	268.698	223.027	221.726	225.257	250.46	128.638	184.398	205.83	115.367	87.5068	170.805
Dgcr2	ENSMUSG00000003166	12.9466	57.9823	125.722	79.7217	96.8605	150.444	99.7766	85.3693	106.146	106.715	117.362	128.789
Mical3	ENSMUSG00000003178	11006.5	6612.81	6658.94	4356.46	4507.39	3804.81	2798.69	3827.96	4130.45	3367.76	2599.47	2601.35
Irf3	ENSMUSG00000003184	871.124	666.089	706.107	539.782	438.5	606.819	843.566	496.849	457.811	491.272	482.831	511.502
Bcl2l12	ENSMUSG00000003190	116.52	107.479	51.6664	52.3174	58.5668	89.0898	66.7926	31.5866	83.0706	66.3361	39.1207	51.1502
Zfp959	ENSMUSG00000003198	46.238	8.48521	40.472	18.2696	11.2629	18.4903	9.8952	17.0739	10.1531	13.4595	12.3539	26.4885
Mpnd	ENSMUSG00000003199	90.6264	70.7101	49.0831	48.9956	78.0891	67.2376	26.3872	115.249	66.4565	77.8728	84.4183	49.3234
Sh3gl1	ENSMUSG00000003200	954.352	758.012	726.774	268.23	352.903	313.495	169.868	262.937	248.289	96.1393	183.249	175.372
Ebi3	ENSMUSG00000003206	0	0	0	0	0	3.36188	0	0	0	0	0	0
Ccdc94	ENSMUSG00000003208	454.982	46.6686	2.58332	63.113	25.5291	37.8211	13.1936	31.5866	39.6893	21.1506	62.799	83.1191
Ranbp2	ENSMUSG00000003226	612.191	376.178	728.496	1513.88	1289.22	1002.68	1292.97	1523.84	1273.75	1284.42	1558.65	1744.59
Edar	ENSMUSG00000003227	51.7865	43.8402	84.3884	18.2696	45.0514	22.6927	4.123	69.1491	37.8433	13.4595	25.7373	30.1421
Grk5	ENSMUSG00000003228	1459.27	1308.14	699.218	708.361	669.764	395.861	139.357	485.751	562.111	193.24	147.217	163.498
Dvl3	ENSMUSG00000003233	4714.42	3597.73	2023.6	1252.3	1158.57	1143.04	1090.12	1366.76	1067.92	1844.91	1298.19	1423.99
Abcf3	ENSMUSG00000003234	170.156	343.651	252.304	587.117	491.06	497.558	552.482	742.713	611.953	669.129	595.046	585.488
Eif2b5	ENSMUSG00000003235	79.5293	59.3965	46.4998	127.056	172.697	80.6851	110.496	134.03	103.377	108.637	81.3298	92.2531
Cyth2	ENSMUSG00000003269	564.103	117.379	223.888	178.543	316.111	224.405	216.87	181.837	204.907	117.29	182.22	133.356
Sult2b1	ENSMUSG00000003271	0	0	0	0	0	0.84047	0	0	0	0	0	0
Car11	ENSMUSG00000003273	210.845	753.769	274.693	199.304	263.551	136.997	39.5808	110.98	119.068	43.2627	63.8285	32.8823
Dlgap1	ENSMUSG00000003279	81.3788	36.7692	29.2776	19.1	9.01028	5.88329	29.6856	28.1719	23.0752	18.2665	18.5308	18.2679
Plag1	ENSMUSG00000003282	503.069	535.982	451.22	349.613	291.332	381.573	437.863	365.381	296.285	382.634	409.737	500.542
Hck	ENSMUSG00000003283	0	1.4142	2.58332	4.98261	0.750857	2.52141	0.8246	3.41477	2.76902	0.961393	4.11796	0.913397
Mrpl4	ENSMUSG00000003299	179.403	69.2959	69.7496	141.174	99.864	126.911	103.9	136.591	123.683	117.29	225.459	108.694
Keap1	ENSMUSG00000003308	166.457	52.3254	68.8885	167.748	241.025	67.2376	103.9	157.079	187.37	142.286	125.598	121.482
Ap1m2	ENSMUSG00000003309	0	0	0.861106	0	0	0	0	0	1.84601	0.961393	0	0
Glg1	ENSMUSG00000003316	427.239	391.734	628.608	538.121	548.876	532.017	641.539	459.287	628.568	569.144	624.901	519.723
Atp8b3	ENSMUSG00000003341	1.84952	7.07101	1.72221	1.66087	1.50171	0	0	17.9275	0	0.961393	4.11796	0
Btbd2	ENSMUSG00000003344	68.4322	251.728	366.831	156.122	231.264	75.6423	64.3188	76.8323	112.607	175.935	185.308	130.616
Csnk1g2	ENSMUSG00000003345	353.258	270.112	162.749	249.961	236.52	198.351	188.833	186.959	218.753	224.966	178.102	130.616
Abhd17a	ENSMUSG00000003346	33.2913	2.8284	12.9166	32.3869	24.7783	26.895	9.8952	56.3437	18.4601	26.919	20.5898	29.2287
Mob3a	ENSMUSG00000003348	123.918	12.7278	25.8332	22.4217	15.768	5.88329	6.5968	5.12216	21.2292	1.92279	12.3539	0.913397
Cacnb3	ENSMUSG00000003352	288.525	313.953	59.4163	80.5521	63.8228	20.1713	10.7198	35.8551	28.6132	3.84557	9.26542	5.48038
Ccdc65	ENSMUSG00000003354	0	9.89941	0.861106	12.4565	24.7783	12.607	0.8246	15.3665	6.46105	7.69114	13.3834	6.39378
Fkbp11	ENSMUSG00000003355	40.6894	0	10.3333	16.6087	1.50171	5.88329	4.123	0	2.76902	4.80696	2.05898	10.0474
Ddx23	ENSMUSG00000003360	1731.15	1166.72	463.275	401.93	494.064	421.916	284.487	430.261	353.512	431.665	325.319	309.642
Pld3	ENSMUSG00000003363	40.6894	45.2544	127.444	243.317	117.134	83.2065	91.5306	92.1988	78.4556	131.711	76.1823	74.8986
Grik5	ENSMUSG00000003378	654.73	759.426	386.637	129.548	259.796	226.086	174.815	246.717	233.521	364.368	235.753	294.114
Cd79a	ENSMUSG00000003379	0	67.8817	0	1.66087	6.00685	0	0	0	0	0	1.02949	0
Rabac1	ENSMUSG00000003380	0	4.2426	10.3333	9.13478	6.00685	10.0856	18.1412	27.3182	29.5362	17.3051	28.8258	34.7091
Etv3	ENSMUSG00000003382	1006.14	879.633	483.942	191.83	188.465	475.706	286.961	297.939	216.907	271.113	372.676	335.217
Prkcsh	ENSMUSG00000003402	549.307	181.018	176.527	83.8739	92.3554	126.07	88.2322	91.3451	74.7635	100.946	73.0939	57.544
Elavl3	ENSMUSG00000003410	5.54856	1.4142	47.3609	19.9304	6.00685	6.72376	3.2984	1.70739	0.923007	11.5367	15.4424	4.56699
Rab3b	ENSMUSG00000003411	7.39808	12.7278	5.16664	0.830434	1.50171	5.04282	0.8246	3.41477	1.84601	11.5367	36.0322	10.9608
St8sia6	ENSMUSG00000003418	1.84952	50.9112	2.58332	0	10.512	16.8094	5.7722	0.853693	1.84601	2.88418	7.20644	0
Fcgrt	ENSMUSG00000003420	0	7.07101	27.5554	38.2	63.072	74.8018	30.5102	44.392	56.3034	74.9886	105.008	75.812
Nosip	ENSMUSG00000003421	168.306	261.627	130.027	170.239	43.5497	104.218	89.0568	74.2713	90.4546	209.584	120.45	96.8201
Pih1d1	ENSMUSG00000003423	412.443	216.373	77.4996	189.339	326.623	131.954	68.4418	184.398	197.523	124.981	189.426	135.183
Rps11	ENSMUSG00000003429	51.7865	134.349	105.055	198.474	109.625	72.2804	53.599	105.858	119.991	134.595	108.097	112.348
Supt5	ENSMUSG00000003435	2223.12	1445.31	687.163	610.369	728.331	407.628	342.209	766.616	656.258	654.708	544.601	629.331
Dll3	ENSMUSG00000003436	0	0	0	0	0.750857	0	4.123	0	0	3.84557	1.02949	0.913397
Paf1	ENSMUSG00000003437	2132.5	1634.82	691.469	793.895	683.28	660.609	314.173	760.64	768.865	918.13	540.483	469.486
Timm50	ENSMUSG00000003438	1.84952	62.2249	58.5552	34.8782	82.5943	23.5331	122.041	136.591	57.2264	92.2937	101.92	45.6699
Med29	ENSMUSG00000003444	53.6361	41.0118	153.277	66.4348	28.5326	32.7783	48.6514	31.5866	61.8414	72.1044	53.5335	122.395
Bicd1	ENSMUSG00000003452	362.506	356.379	540.775	204.287	237.271	229.448	164.095	155.372	310.13	246.116	143.099	196.38
Ncstn	ENSMUSG00000003458	188.651	165.462	244.554	230.861	316.862	237.853	447.758	157.933	203.984	155.746	183.249	206.428
Pex19	ENSMUSG00000003464	645.482	106.065	267.804	280.687	301.844	445.449	554.131	307.329	246.443	389.364	355.174	331.563
Phyhip	ENSMUSG00000003469	344.011	240.414	161.027	119.583	184.711	283.238	241.608	123.785	107.069	276.881	213.105	176.286
Crhr2	ENSMUSG00000003476	599.244	326.68	195.471	217.574	134.403	375.69	432.09	364.527	326.744	525.882	358.263	450.305
Inmt	ENSMUSG00000003477	0	0	0	0	0	2.52141	0	0	0	0	0	0
Cyp4f18	ENSMUSG00000003484	0	0	0	0.830434	0	0	0	0	0	0	0	0
Impdh1	ENSMUSG00000003500	18.4952	76.3669	36.1665	110.448	37.5428	43.7044	30.5102	34.1477	49.8424	29.8032	30.8847	44.7565
Psg18	ENSMUSG00000003505	0	0	0	0	0	0	0	0	0	0	0	0
Dusp3	ENSMUSG00000003518	390.249	340.823	286.748	473.348	398.705	514.367	587.94	491.727	388.586	348.985	340.762	405.548
Prodh	ENSMUSG00000003526	1934.6	1192.17	1255.49	291.482	694.543	1030.42	664.628	533.558	657.181	1022.92	989.341	925.271
Dgcr14	ENSMUSG00000003527	565.953	1216.21	164.471	147.817	188.465	104.218	131.936	145.981	255.673	220.159	134.863	217.389
Slc25a1	ENSMUSG00000003528	0	11.3136	0	67.2652	39.7954	42.0235	16.492	21.3423	47.0733	7.69114	4.11796	21.0081
Dgcr6	ENSMUSG00000003531	73.9808	98.9941	33.5832	127.887	132.902	105.059	40.4054	121.224	170.756	153.823	105.008	120.568
Ddr1	ENSMUSG00000003534	1032.03	1022.47	658.746	195.152	371.674	363.083	202.027	254.4	224.291	231.696	196.633	186.333
Ier3	ENSMUSG00000003541	225.641	1323.69	415.914	812.165	866.489	235.331	192.132	424.285	505.808	145.17	94.7132	137.01
Fosb	ENSMUSG00000003545	40.6894	1.4142	0.861106	4.98261	8.25943	4.20235	0.8246	1.70739	3.69203	4.80696	2.05898	10.0474
Klc4	ENSMUSG00000003546	397.647	264.456	228.193	146.987	193.721	230.289	239.134	227.936	292.593	270.151	220.311	140.663
Ercc1	ENSMUSG00000003549	323.666	107.479	576.941	115.43	111.127	135.316	56.0728	97.321	81.2246	108.637	86.4773	120.568
Cyp17a1	ENSMUSG00000003555	0	0	0	0	0	0	4.9476	0	0.923007	0.961393	0	11.8742
As3mt	ENSMUSG00000003559	1.84952	15.5562	19.8054	76.4	25.5291	67.2376	80.8108	39.2699	67.3795	93.2551	67.9464	116.001
Homer3	ENSMUSG00000003573	14.7962	5.65681	0.861106	9.13478	14.2663	20.1713	9.8952	17.9275	13.8451	2.88418	3.08847	3.65359
Crtc1	ENSMUSG00000003575	3737.88	2828.4	1264.97	448.435	614.201	546.305	606.906	485.751	452.273	746.041	647.55	751.726
Rnf215	ENSMUSG00000003581	3.69904	35.355	26.6943	105.465	39.7954	32.7783	40.4054	78.5397	74.7635	48.0696	57.6515	55.7172
Sec14l2	ENSMUSG00000003585	0	0	0.861106	4.98261	2.25257	6.72376	3.2984	26.4645	2.76902	6.72975	6.17695	2.74019
Aven	ENSMUSG00000003604	292.224	197.988	255.749	63.113	123.891	92.4517	147.603	87.9304	58.1494	89.4095	77.2118	47.4966
Cp	ENSMUSG00000003617	1115.26	2159.49	832.69	1214.93	1665.4	1385.93	2043.36	933.94	1446.35	1682.44	2294.74	2307.24
Crot	ENSMUSG00000003623	199.748	19.7988	100.749	150.309	99.864	148.763	202.852	149.396	170.756	144.209	100.89	139.75
Rps6ka1	ENSMUSG00000003644	1.84952	16.9704	25.8332	15.7783	15.0171	32.7783	18.1412	23.9034	20.3061	18.2665	16.4719	12.7876
Calb2	ENSMUSG00000003657	3.69904	0	0	0	0	0	0	0	0	0	0	0
Snrnp200	ENSMUSG00000003660	1710.81	509.112	414.192	645.248	710.311	581.605	578.869	644.538	565.803	729.697	582.692	675
Ciao1	ENSMUSG00000003662	0	5.65681	0.861106	33.2174	16.5189	5.88329	21.4396	30.7329	34.1512	36.5329	31.9142	41.1029
Has1	ENSMUSG00000003665	9.2476	24.0414	0.861106	9.13478	8.25943	10.9261	3.2984	1.70739	0.923007	7.69114	1.02949	3.65359
Taf6l	ENSMUSG00000003680	49.937	14.142	273.832	65.6043	78.84	157.168	202.852	106.712	113.53	131.711	75.1529	119.655
Insig2	ENSMUSG00000003721	12.9466	69.2959	119.694	112.109	63.8228	120.187	161.622	44.392	80.3016	92.2937	85.4478	108.694
Kpna6	ENSMUSG00000003731	582.599	500.627	514.081	567.187	514.337	633.714	832.021	711.126	647.951	547.994	548.719	506.022
Man1a	ENSMUSG00000003746	477.176	449.716	413.331	861.991	822.939	574.881	1053.84	823.814	880.548	823.913	618.724	590.968
Itpkc	ENSMUSG00000003752	251.535	130.107	144.666	96.3304	125.393	65.5566	132.761	87.0767	97.8387	70.1817	44.2681	92.2531
Adck4	ENSMUSG00000003762	318.117	367.692	218.721	129.548	157.68	195.829	63.4942	64.027	172.602	38.4557	50.4451	76.7254
Brd8	ENSMUSG00000003778	2154.69	1723.91	1770.43	1413.4	1226.15	1228.77	1493.35	1224.2	1224.83	1159.44	1118.03	1063.19
Kif20a	ENSMUSG00000003779	3.69904	45.2544	9.47217	51.4869	16.5189	89.0898	83.2846	24.7571	34.1512	39.4171	38.0912	48.41
Farsa	ENSMUSG00000003808	220.093	292.74	405.581	220.065	344.643	231.129	284.487	275.743	174.448	287.456	305.759	218.302
Gcdh	ENSMUSG00000003809	3.69904	16.9704	7.74996	19.1	34.5394	29.4164	39.5808	55.49	25.8442	64.4133	54.563	26.4885
Mast2	ENSMUSG00000003810	44146.2	27613.7	16784.7	6077.95	6879.35	12009.5	8269.91	7789.09	7819.71	11787.6	7223.94	7627.78
NA	ENSMUSG00000003812	20.3447	154.148	20.6666	127.056	61.5703	44.5449	67.6172	37.5625	31.3822	68.2589	65.8874	73.9852
Rad23a	ENSMUSG00000003813	86.9274	212.13	154.138	100.483	113.379	153.806	173.991	117.81	98.7617	104.792	88.5362	148.884
Calr	ENSMUSG00000003814	1459.27	758.012	428.831	406.082	250.786	164.732	241.608	382.454	285.209	449.932	410.767	463.092
Syce2	ENSMUSG00000003824	129.466	63.6391	144.666	21.5913	15.768	10.0856	93.1798	21.3423	44.3043	10.5753	15.4424	34.7091
Nfat5	ENSMUSG00000003847	8603.96	8049.63	6590.91	6630.19	7227.75	3925.83	2914.96	6045.85	5887.86	4353.19	3657.78	3867.32
Nob1	ENSMUSG00000003848	162.758	96.1657	137.777	214.252	233.516	216.841	244.082	328.672	200.292	248.039	220.311	184.506
Nqo1	ENSMUSG00000003849	1.84952	8.48521	118.833	99.6521	78.0891	123.549	145.13	94.7599	93.2237	88.4481	121.48	74.8986
Ppfia3	ENSMUSG00000003863	0	7.07101	2.58332	15.7783	6.00685	16.8094	7.4214	11.098	19.3831	41.3399	29.8552	37.4493
Gys1	ENSMUSG00000003865	828.585	776.397	717.302	673.482	710.311	727.006	666.277	984.308	640.567	677.782	609.459	651.252
Ruvbl2	ENSMUSG00000003868	135.015	244.657	134.333	137.852	62.3211	105.899	151.726	122.932	104.3	160.553	126.627	119.655
Lin7b	ENSMUSG00000003872	0	4.2426	0	0	2.25257	0.84047	0	3.41477	0.923007	0	5.14746	1.82679
Bax	ENSMUSG00000003873	22.1942	11.3136	82.6662	107.956	112.629	62.1947	13.1936	90.4914	98.7617	111.522	54.563	48.41
Il7r	ENSMUSG00000003882	0	1.4142	0	0	0	1.68094	0	0.853693	0.923007	0	2.05898	1.82679
Tfam	ENSMUSG00000003923	57.3351	0	14.6388	61.4521	39.0446	59.6733	61.0204	35.8551	43.3813	46.1468	55.5925	54.8038
Zfp81	ENSMUSG00000003929	16.6457	4.2426	63.7219	163.596	207.236	252.141	177.289	199.764	187.37	124.02	224.429	165.325
Efnb3	ENSMUSG00000003934	3.69904	0	6.02775	4.15217	28.5326	33.6188	141.831	17.0739	42.4583	160.553	200.751	161.671
Mmd	ENSMUSG00000003948	22.1942	7.07101	80.0829	138.683	158.431	105.059	280.364	83.6619	135.682	102.869	106.038	180.853
Hlf	ENSMUSG00000003949	480.875	11.3136	13.7777	53.9782	15.0171	122.709	164.92	35.0014	67.3795	122.097	149.276	80.3789
Fam162a	ENSMUSG00000003955	48.0875	22.6272	25.8332	133.7	60.0685	44.5449	81.6354	78.5397	50.7654	116.328	62.799	49.3234
Rpl8	ENSMUSG00000003970	55.4856	56.5681	2.58332	81.3826	78.84	20.1713	32.984	54.6363	135.682	60.5677	77.2118	62.111
Grm3	ENSMUSG00000003974	0	0	0	0	0	0.84047	2.4738	0	0	2.88418	0	4.56699
Ssbp2	ENSMUSG00000003992	48.0875	169.704	133.472	329.682	434.746	247.939	324.892	198.057	280.594	226.889	231.636	252.098
Fancl	ENSMUSG00000004018	0	0	24.9721	32.3869	25.5291	72.2804	41.23	30.7329	57.2264	23.0734	33.9732	14.6144
Brinp2	ENSMUSG00000004031	0	0	0	0	0.750857	0.84047	0	0	0	0	0	0
Gstm5	ENSMUSG00000004032	0	1.4142	3.44443	44.013	0.750857	15.1285	0	5.12216	13.8451	6.72975	3.08847	6.39378
Gstm7	ENSMUSG00000004035	1.84952	2.8284	33.5832	9.96521	2.25257	33.6188	1.6492	36.7088	39.6893	60.5677	80.3003	31.0555
Gstm3	ENSMUSG00000004038	1.84952	1.4142	24.111	4.98261	9.76114	33.6188	22.2642	15.3665	21.2292	13.4595	11.3244	24.6617
Stat3	ENSMUSG00000004040	3678.69	2623.34	2437.79	1527.17	1435.64	1759.94	1594.78	2280.21	1576.5	1916.06	1722.34	1593.88
Stat5a	ENSMUSG00000004043	469.778	367.692	282.443	240.826	125.393	296.686	172.341	198.91	353.512	442.241	306.788	261.232
Ptrf	ENSMUSG00000004044	1422.28	417.189	202.36	117.922	223.004	280.717	102.25	161.348	124.606	150.939	178.102	186.333
Map3k11	ENSMUSG00000004054	318.117	254.556	285.887	202.626	137.407	200.872	244.082	169.885	179.986	229.773	171.925	201.861
Akt2	ENSMUSG00000004056	1041.28	500.627	1232.24	466.704	408.466	474.025	621.748	401.236	291.67	727.774	651.668	706.969
Dnaja3	ENSMUSG00000004069	24.0437	183.846	196.332	274.043	234.267	184.903	266.346	290.256	221.522	195.163	217.223	257.578
Hmox2	ENSMUSG00000004070	20.3447	49.497	114.527	68.0956	41.2971	89.9302	39.5808	38.4162	70.1485	55.7608	125.598	120.568
Cdip1	ENSMUSG00000004071	308.87	181.018	215.277	409.404	370.172	517.729	695.962	382.454	445.812	491.272	495.185	517.896
Zak	ENSMUSG00000004085	2069.61	2730.82	4305.53	5348	4362.48	4125.02	6066.58	3984.18	4377.82	3765.77	5121.72	5140.6
Cwc15	ENSMUSG00000004096	194.2	141.42	153.277	44.8435	66.0754	55.471	61.0204	83.6619	71.9945	48.0696	59.7105	76.7254
Col5a3	ENSMUSG00000004098	575.2	110.308	223.027	48.9956	66.0754	72.2804	4.123	27.3182	103.377	43.2627	24.7078	32.8823
Dnmt1	ENSMUSG00000004099	1620.18	1339.25	511.497	247.469	392.698	255.503	95.6536	163.055	268.595	104.792	110.156	80.3789
Ppan	ENSMUSG00000004100	1252.12	175.361	144.666	162.765	155.427	106.74	82.46	115.249	143.066	44.2241	37.0617	55.7172
Angptl2	ENSMUSG00000004105	1126.36	735.385	799.968	793.065	652.495	895.1	627.521	478.068	805.785	349.947	520.923	587.314
Cacna1e	ENSMUSG00000004110	12.9466	22.6272	0.861106	6.64348	6.00685	2.52141	17.3166	5.97585	2.76902	14.4209	2.05898	3.65359
Cacna1b	ENSMUSG00000004113	7.39808	2.8284	2.58332	4.15217	6.75771	15.9689	0	5.12216	4.61503	5.76836	10.2949	0.913397
Trmt10a	ENSMUSG00000004127	188.651	55.1539	62.8608	92.1782	130.649	43.7044	123.69	65.7343	85.8396	113.444	126.627	137.01
NA	ENSMUSG00000004151	77.6798	11.3136	32.722	36.5391	42.048	83.2065	43.7038	57.1974	39.6893	38.4557	55.5925	32.8823
Kifc2	ENSMUSG00000004187	393.948	323.852	106.777	155.291	138.909	205.915	128.638	172.446	211.369	251.885	198.692	158.931
Psap	ENSMUSG00000004207	536.361	606.692	731.079	675.974	646.488	791.722	1185.77	935.647	695.947	966.2	1079.94	1000.17
Ikbkg	ENSMUSG00000004221	262.632	36.7692	147.249	116.261	86.3485	178.18	426.318	103.297	152.296	123.058	278.992	216.475
Pax2	ENSMUSG00000004231	12.9466	0	3.44443	0	0.750857	1.68094	2.4738	0	0.923007	0	2.05898	0.913397
Wars2	ENSMUSG00000004233	27.7428	84.8521	75.7774	207.609	132.151	268.95	316.646	189.52	142.143	240.348	175.014	195.467
Atn1	ENSMUSG00000004263	2691.05	2242.92	1247.74	710.852	907.035	594.212	257.275	589.048	928.545	286.495	364.44	395.501
Phb2	ENSMUSG00000004264	1239.18	543.053	396.97	371.204	431.743	502.601	613.502	415.748	362.742	381.673	500.333	396.414
Ptpn6	ENSMUSG00000004266	3.69904	16.9704	16.361	22.4217	12.0137	12.607	8.246	10.2443	2.76902	21.1506	3.08847	14.6144
Eno2	ENSMUSG00000004267	538.21	569.923	541.636	283.178	450.514	149.604	65.1434	114.395	325.821	53.838	42.2091	9.13397
Emg1	ENSMUSG00000004268	40.6894	89.0947	154.999	145.326	89.352	144.561	97.3028	173.3	107.069	141.325	155.453	106.867
Lpcat3	ENSMUSG00000004270	107.272	66.4675	40.472	68.9261	68.328	42.8639	75.8632	66.588	93.2237	69.2203	101.92	108.694
Atp6v1f	ENSMUSG00000004285	0	4.2426	0	4.98261	9.76114	10.0856	1.6492	7.68323	5.53804	10.5753	11.3244	11.8742
Il12b	ENSMUSG00000004296	0	0	0	0	0	0	0.8246	0	0	0	0	0
Clcn5	ENSMUSG00000004317	151.661	28.284	12.9166	24.0826	41.2971	42.8639	8.246	62.3196	34.1512	0.961393	13.3834	18.2679
Clcn3	ENSMUSG00000004319	1107.86	424.26	1023.86	1291.33	1142.8	1606.98	2102.73	1237.85	1167.6	1541.11	1842.79	2197.63
Hif3a	ENSMUSG00000004328	20.3447	707.101	269.526	42.3522	108.874	154.646	30.5102	32.4403	59.9954	122.097	66.9169	89.5129
Gpx6	ENSMUSG00000004341	0	0	0	0	0	0	0	0	0	0	0	0
Gpx5	ENSMUSG00000004344	0	0	0	0.830434	0	0	0	0	0	0	0	0
Pde1c	ENSMUSG00000004347	1418.58	1185.1	1163.35	614.521	552.631	1099.33	1024.15	699.174	891.624	1106.56	1135.53	966.374
Utp20	ENSMUSG00000004356	837.832	560.024	751.746	588.778	931.062	588.329	696.787	579.657	794.709	597.025	575.486	728.891
Spic	ENSMUSG00000004359	0	0	0	3.32174	0.750857	0.84047	1.6492	0	1.84601	4.80696	2.05898	0
9330159F19Rik	ENSMUSG00000004360	36.9904	69.2959	11.1944	5.81304	7.50857	24.3736	4.9476	11.9517	6.46105	7.69114	46.3271	10.0474
Cul3	ENSMUSG00000004364	61.0341	84.8521	70.6107	401.93	397.203	224.405	347.981	472.092	416.276	346.101	357.233	377.233
Sst	ENSMUSG00000004366	0	0	0	0	0	0	0	0	0	0	0	0
Il11	ENSMUSG00000004371	3.69904	2.8284	4.30553	0.830434	3.75428	0	0.8246	1.70739	2.76902	9.61393	5.14746	1.82679
Large	ENSMUSG00000004383	1646.07	2049.18	2307.77	1668.34	1805.81	2295.32	2468.03	1598.97	1884.78	1543.04	1295.1	1533.59
Ddx56	ENSMUSG00000004393	96.175	12.7278	99.8884	120.413	113.379	125.23	126.988	127.2	117.222	158.63	201.78	135.183
Tmed4	ENSMUSG00000004394	569.652	185.26	48.222	428.504	201.98	310.974	306.751	403.797	190.139	241.31	229.577	195.467
Col26a1	ENSMUSG00000004415	0	1.4142	0	0.830434	0.750857	0	2.4738	0.853693	0	0	3.08847	0.913397
Bid	ENSMUSG00000004446	42.5389	9.89941	43.9164	53.1478	33.7886	19.3308	17.3166	22.196	14.7681	8.65253	13.3834	26.4885
Ralb	ENSMUSG00000004451	105.423	318.195	390.081	132.87	226.759	198.351	222.642	77.686	126.452	50.9538	145.158	109.608
Ppp1cc	ENSMUSG00000004455	482.725	391.734	588.997	352.104	295.838	421.075	536.815	220.253	323.052	308.607	229.577	233.83
Dnajb11	ENSMUSG00000004460	9.2476	24.0414	19.8054	174.391	214.745	86.5684	110.496	162.202	149.527	223.043	190.456	160.758
Tbccd1	ENSMUSG00000004462	0	8.48521	20.6666	50.6565	55.5634	57.9924	73.3894	62.3196	56.3034	99.9848	40.1502	59.3708
Clec11a	ENSMUSG00000004473	36.9904	60.8107	25.8332	57.3	49.5566	41.183	73.3894	47.8068	26.7672	68.2589	76.1823	52.977
Zfp324	ENSMUSG00000004500	258.933	96.1657	121.416	187.678	92.3554	109.261	70.9156	103.297	159.68	185.549	200.751	284.98
Gab2	ENSMUSG00000004508	695.419	1254.4	245.415	344.63	334.882	200.872	152.551	281.719	354.435	144.209	156.483	84.9459
Coro1c	ENSMUSG00000004530	110.971	227.686	159.305	197.643	162.185	278.195	91.5306	127.2	160.603	145.17	131.775	104.127
Tax1bp1	ENSMUSG00000004535	486.424	287.083	352.193	533.969	788.4	480.749	557.43	700.028	685.794	530.689	595.046	617.456
Psg17	ENSMUSG00000004540	0	0	0	0	0	0	0	1.70739	0	0	0	0
Psg19	ENSMUSG00000004542	0	83.4379	0.861106	0.830434	0	0	0.8246	0	0.923007	0.961393	0	0
Ctse	ENSMUSG00000004552	40.6894	35.355	6.02775	1.66087	2.25257	1.68094	4.9476	4.26846	5.53804	1.92279	7.20644	2.74019
Ndrg2	ENSMUSG00000004558	7875.25	6151.78	6363.58	4678.67	4029.85	5362.2	5838.99	4997.52	4925.16	4333	4424.75	4335.9
Mettl17	ENSMUSG00000004561	170.156	62.2249	143.805	113.77	129.147	116.825	163.271	150.25	140.297	87.4867	122.509	107.781
Arhgef40	ENSMUSG00000004562	1451.87	2851.03	1044.52	430.995	566.146	750.539	268.82	509.655	559.342	347.063	306.788	324.256
Pnpla6	ENSMUSG00000004565	547.458	397.391	482.22	109.617	144.915	241.215	71.7402	100.736	158.757	89.4095	60.74	106.867
Mcoln1	ENSMUSG00000004567	449.433	342.237	580.386	328.852	285.326	444.608	238.309	261.23	284.286	291.302	348.998	389.107
Arhgef18	ENSMUSG00000004568	1966.04	1886.54	854.218	673.482	619.457	382.414	387.562	454.165	574.11	376.866	408.708	361.705
Pkn2	ENSMUSG00000004591	144.262	298.396	382.331	715.004	744.099	365.604	423.02	745.274	706.1	647.979	667.11	617.456
Cd33	ENSMUSG00000004609	3.69904	9.89941	9.47217	1.66087	2.25257	9.24517	0	18.7812	7.38405	3.84557	14.4129	9.13397
Etfb	ENSMUSG00000004610	334.763	94.7515	120.555	144.496	131.4	105.059	176.464	169.885	119.991	170.166	290.317	200.034
Nkg7	ENSMUSG00000004612	1.84952	0	0	0	0	0	0	0	0	0	0	0
Lim2	ENSMUSG00000004613	0	0	0	0	0	0	0	0	0	0	0	0
Stxbp2	ENSMUSG00000004626	355.108	132.935	49.9442	99.6521	142.663	95.8135	89.0568	116.956	203.984	36.5329	46.3271	29.2287
Pcp2	ENSMUSG00000004630	0	0	0.861106	18.2696	36.0411	0	32.1594	22.196	6.46105	73.0658	30.8847	44.7565
Sgce	ENSMUSG00000004631	0	24.0414	1.72221	14.1174	2.25257	4.20235	11.5444	11.098	0	5.76836	3.08847	0.913397
Chn2	ENSMUSG00000004633	3.69904	84.8521	4.30553	2.4913	18.0206	17.6499	3.2984	13.6591	13.8451	0.961393	7.20644	3.65359
Wwox	ENSMUSG00000004637	85.0779	120.207	200.638	191.83	207.236	260.546	149.253	136.591	182.755	283.611	258.402	214.648
Slbp	ENSMUSG00000004642	184.952	69.2959	15.4999	161.104	164.438	190.787	172.341	126.347	79.3786	136.518	155.453	216.475
Tyr	ENSMUSG00000004651	0	0	2.58332	0	2.25257	0	0	0	0.923007	1.92279	3.08847	0
Ghrhr	ENSMUSG00000004654	3.69904	0	0	0	0	0.84047	0	0	0	0	0	0
Aqp1	ENSMUSG00000004655	11.0971	72.1243	0	9.13478	1.50171	0.84047	42.0546	5.12216	7.38405	33.6487	105.008	54.8038
Arid3b	ENSMUSG00000004661	464.229	165.462	103.333	139.513	178.704	189.946	83.2846	75.125	186.447	109.599	87.5068	122.395
Cnn2	ENSMUSG00000004665	131.316	84.8521	102.472	176.883	172.697	84.8874	66.7926	136.591	115.376	76.9114	51.4746	64.8512
Polr2e	ENSMUSG00000004667	774.949	410.118	477.053	198.474	129.898	301.729	213.571	223.668	155.065	119.213	145.158	131.529
Abca13	ENSMUSG00000004668	3.69904	2.8284	0	0.830434	3.00343	1.68094	0	0	0	0	0	0.913397
Myo9b	ENSMUSG00000004677	25234.8	15467.1	10466.7	7598.47	10471.4	6087.52	4155.16	7294.8	7532.66	6131.76	6249.01	6639.48
Hdac9	ENSMUSG00000004698	3164.53	2327.78	2259.54	1258.11	949.834	1289.28	878.199	1772.27	1348.51	883.52	743.293	812.01
Ly9	ENSMUSG00000004707	16.6457	0	7.74996	0	3.75428	0	0	20.4886	0	0	0	0
Cd244	ENSMUSG00000004709	11.0971	0	0	2.4913	0	0	0	0.853693	0.923007	0.961393	4.11796	0
Emr1	ENSMUSG00000004730	0	7.07101	1.72221	8.30434	0.750857	1.68094	3.2984	0	8.30706	0	2.05898	11.8742
Mtfp1	ENSMUSG00000004748	0	29.6982	21.5277	58.9608	12.7646	21.8522	110.496	31.5866	59.9954	123.058	86.4773	115.088
Rab23	ENSMUSG00000004768	123.918	164.047	99.8884	210.1	300.343	216.001	247.38	207.447	188.293	121.135	172.955	221.955
Rab11a	ENSMUSG00000004771	11.0971	55.1539	49.9442	102.974	61.5703	39.5021	103.9	42.6846	83.0706	33.6487	63.8285	73.9852
Eif2b2	ENSMUSG00000004788	46.238	106.065	87.8329	83.8739	36.0411	73.9613	99.7766	102.443	92.3007	104.792	110.156	123.309
Dlst	ENSMUSG00000004789	1886.51	1122.88	1284.77	1170.08	1107.51	1294.32	1772.89	1737.26	1482.35	1812.22	1244.65	1150.88
Pgf	ENSMUSG00000004791	0	7.07101	0	0	0.750857	3.36188	0	0	3.69203	13.4595	0	0
Ulk2	ENSMUSG00000004798	845.23	622.249	668.219	553.9	696.795	431.161	582.168	678.686	775.326	830.643	713.437	720.67
Ccl24	ENSMUSG00000004814	0	4.2426	0	0	0	0	0	0	0	0	1.02949	3.65359
Dgkq	ENSMUSG00000004815	116.52	209.302	636.358	230.861	244.028	542.103	527.744	262.937	201.215	381.673	263.55	270.366
Tmed11	ENSMUSG00000004821	0	0	0	0	0	0	0	0	0	0	0	0
Grap	ENSMUSG00000004837	7.39808	15.5562	1.72221	4.98261	5.256	1.68094	1.6492	0.853693	1.84601	0.961393	11.3244	8.22057
Pou1f1	ENSMUSG00000004842	27.7428	15.5562	6.88885	5.81304	3.00343	0.84047	0	2.56108	0	0	2.05898	0.913397
Chmp2b	ENSMUSG00000004843	29.5923	106.065	60.2775	37.3695	51.0583	24.3736	43.7038	25.6108	22.1522	31.726	29.8552	42.0163
Plod3	ENSMUSG00000004846	375.452	254.556	170.499	185.187	256.042	259.705	326.542	262.937	239.982	160.553	197.662	128.789
Ap1s1	ENSMUSG00000004849	14.7962	19.7988	20.6666	34.0478	30.0343	6.72376	9.8952	22.196	16.6141	23.0734	28.8258	22.8349
Mapk13	ENSMUSG00000004864	0	0	0.861106	0	0	0	0	0	0	0	0	0
Srpk1	ENSMUSG00000004865	1821.78	1487.74	568.33	1246.48	1429.63	911.91	771.001	1037.24	1306.05	1291.15	849.33	833.018
Pax3	ENSMUSG00000004872	18.4952	5.65681	6.02775	4.98261	0.750857	5.88329	5.7722	1.70739	5.53804	1.92279	1.02949	3.65359
Lbr	ENSMUSG00000004880	24.0437	18.3846	46.4998	112.109	95.3588	34.4593	32.984	105.858	82.1476	62.4905	78.2413	61.1976
Crabp2	ENSMUSG00000004885	5.54856	1.4142	2.58332	0.830434	0	0	0	0.853693	0.923007	0	0	0
Nes	ENSMUSG00000004891	2014.13	1624.92	260.054	569.678	647.989	296.686	47.0022	267.206	395.97	122.097	72.0644	70.3316
Bcan	ENSMUSG00000004892	0	0	0	0	0	1.68094	0	4.26846	0	0	0	0
Hapln2	ENSMUSG00000004894	0	2.8284	0	0	0	0	0	0	0	0	0	0
Prcc	ENSMUSG00000004895	575.2	987.113	449.498	114.6	258.295	129.432	238.309	207.447	119.991	181.703	83.3888	135.183
Rrnad1	ENSMUSG00000004896	177.554	111.722	718.163	623.656	563.143	585.807	681.944	539.534	515.961	818.145	713.437	740.765
Hdgf	ENSMUSG00000004897	236.738	644.876	277.276	189.339	181.707	221.044	202.852	140.006	221.522	188.433	125.598	137.923
Slc25a18	ENSMUSG00000004902	0	2.8284	3.44443	7.47391	26.28	63.8757	21.4396	17.9275	27.6902	23.0734	39.1207	54.8038
Thop1	ENSMUSG00000004929	308.87	179.604	29.2776	70.5869	106.622	82.366	81.6354	61.4659	55.3804	61.5291	62.799	35.6225
Apba3	ENSMUSG00000004931	421.69	429.917	505.47	417.709	318.363	268.11	534.341	457.579	354.435	589.334	570.338	442.084
Matk	ENSMUSG00000004933	29.5923	86.2663	12.0555	57.3	28.5326	103.378	18.9658	34.1477	47.9963	138.441	63.8285	35.6225
Pias4	ENSMUSG00000004934	247.836	452.544	438.303	350.443	327.374	372.328	207.799	264.645	307.361	182.665	221.341	274.019
Map2k1	ENSMUSG00000004936	480.875	83.4379	126.583	186.017	225.257	220.203	188.833	235.619	143.989	116.328	127.657	118.742
Sgta	ENSMUSG00000004937	212.695	374.763	185.999	362.069	253.79	384.095	244.906	348.307	302.746	502.808	300.611	273.106
Nmrk2	ENSMUSG00000004939	900.716	907.917	1237.41	3437.17	2694.83	1435.52	1217.93	3441.24	3497.27	2040.07	1760.43	1818.57
Tmem242	ENSMUSG00000004945	0	0	14.6388	17.4391	15.768	41.183	54.4236	15.3665	20.3061	41.3399	20.5898	21.9215
Dtx2	ENSMUSG00000004947	49.937	209.302	205.804	68.9261	99.1131	104.218	92.3552	108.419	108.915	102.869	86.4773	130.616
Zp3	ENSMUSG00000004948	0	0	0	0	0	0	0	0	0	0	0	0
Hspb1	ENSMUSG00000004951	1413.03	377.592	276.415	1177.56	400.207	80.6851	90.706	236.473	274.133	155.746	301.641	305.988
Rasa4	ENSMUSG00000004952	131.316	244.657	13.7777	85.5347	63.8228	63.8757	26.3872	109.273	46.1503	32.6873	47.3566	20.0947
Syt5	ENSMUSG00000004961	1.84952	0	0.861106	0.830434	0	0	0	0	0.923007	0	0	0
Hnrnpa2b1	ENSMUSG00000004980	1437.08	2091.6	979.078	2267.92	2580.69	1469.14	1487.58	2579.86	2268.75	2516.93	2255.62	1945.54
Fxyd4	ENSMUSG00000004988	0	0	0	13.287	7.50857	6.72376	7.4214	15.3665	23.0752	12.4981	6.17695	9.13397
Ccdc130	ENSMUSG00000004994	628.837	229.101	32.722	188.509	131.4	115.985	45.353	68.2954	95.9927	49.031	93.6837	152.537
Mri1	ENSMUSG00000004996	0	73.5385	48.222	48.1652	32.2868	59.6733	95.6536	30.7329	35.9973	69.2203	63.8285	48.41
Prkacb	ENSMUSG00000005034	38.8399	59.3965	122.277	106.296	101.366	74.8018	106.373	102.443	108.915	106.715	117.362	114.175
Sgsh	ENSMUSG00000005043	858.177	199.402	153.277	73.9087	120.137	94.1326	25.5626	108.419	73.8405	48.0696	48.3861	92.2531
Chd5	ENSMUSG00000005045	397.647	188.089	5.16664	9.96521	12.0137	52.1091	5.7722	30.7329	10.1531	95.1779	22.6488	9.13397
Cstb	ENSMUSG00000005054	0	0	0	4.15217	6.00685	1.68094	0	5.97585	4.61503	0	0	5.48038
Sh2b2	ENSMUSG00000005057	110.971	103.237	141.221	33.2174	12.0137	42.0235	41.23	58.9048	48.9194	77.8728	37.0617	32.8823
Pex5	ENSMUSG00000005069	375.452	216.373	41.3331	39.8609	51.8091	57.1519	71.7402	137.445	62.7644	62.4905	46.3271	36.5359
Jkamp	ENSMUSG00000005078	0	7.07101	7.74996	50.6565	17.2697	7.56423	45.353	21.3423	20.3061	42.3013	18.5308	15.5278
Cd44	ENSMUSG00000005087	860.026	304.053	700.941	615.352	890.516	352.157	58.5466	282.572	546.42	78.8342	35.0027	21.9215
Slc1a2	ENSMUSG00000005089	29.5923	189.503	28.4165	10.7956	30.7851	55.471	18.1412	49.5142	5.53804	9.61393	19.5603	3.65359
Eif2ak4	ENSMUSG00000005102	682.473	722.657	621.719	255.774	475.292	495.877	432.915	358.551	446.735	317.26	351.056	379.973
Wdr1	ENSMUSG00000005103	778.648	855.592	494.275	639.434	599.935	437.885	361.175	500.264	505.808	249.962	288.258	330.65
Slc2a9	ENSMUSG00000005107	27.7428	5.65681	17.2221	19.9304	0	12.607	1.6492	5.97585	0.923007	6.72975	7.20644	14.6144
Wisp1	ENSMUSG00000005124	120.219	42.426	10.3333	75.5695	96.8605	182.382	18.1412	46.9531	35.0743	29.8032	11.3244	38.3627
Ndrg1	ENSMUSG00000005125	201.598	253.142	135.194	310.582	442.255	311.814	61.845	126.347	248.289	23.0734	72.0644	46.5833
4930550C14Rik	ENSMUSG00000005131	0	0	0	0.830434	0	6.72376	0	5.12216	0.923007	2.88418	1.02949	21.0081
Man2b1	ENSMUSG00000005142	120.219	149.905	409.026	176.052	198.977	113.463	366.947	161.348	145.835	144.209	206.928	266.712
Klf5	ENSMUSG00000005148	0	16.9704	3.44443	45.6739	59.3177	3.36188	3.2984	16.2202	17.5371	0	20.5898	9.13397
Wdr83	ENSMUSG00000005150	443.885	96.1657	99.0272	129.548	30.7851	94.9731	124.515	57.1974	32.3052	111.522	79.2708	117.828
Prdx2	ENSMUSG00000005161	112.821	24.0414	99.8884	122.074	60.0685	140.358	111.321	65.7343	75.6865	71.143	141.04	119.655
Polr2a	ENSMUSG00000005198	939.556	369.107	477.053	435.148	500.822	232.81	333.963	399.528	423.66	218.236	348.998	348.918
Shbg	ENSMUSG00000005202	0	0	0	2.4913	0	0	0	0	1.84601	0	0	0
Senp3	ENSMUSG00000005204	1592.44	1342.08	1972.79	706.7	1097.75	1676.74	899.639	683.808	934.083	991.196	751.529	747.159
Corin	ENSMUSG00000005220	3704.59	4437.76	7334.91	2582.65	3703.98	4970.54	3888.81	2859.02	4245.83	2859.18	3304.67	3789.68
Plekha8	ENSMUSG00000005225	7.39808	121.621	146.388	100.483	128.397	231.97	230.063	108.419	154.142	170.166	172.955	166.238
G6pc2	ENSMUSG00000005232	0	0	0	0	3.00343	0	0	0	0	0	0	0
Spc25	ENSMUSG00000005233	0	0	0	1.66087	0	8.4047	0	2.56108	0	0	5.14746	0.913397
Dnah2	ENSMUSG00000005237	1.84952	74.9527	2.58332	0	1.50171	0	6.5968	16.2202	4.61503	4.80696	7.20644	1.82679
Ripk4	ENSMUSG00000005251	12.9466	0	0	1.66087	0	18.4903	4.9476	2.56108	0	0	2.05898	0.913397
Ufd1l	ENSMUSG00000005262	297.773	270.112	434.859	874.447	437.75	641.278	686.067	425.993	526.114	354.754	378.853	357.138
Zfp287	ENSMUSG00000005267	27.7428	53.7396	82.6662	41.5217	36.792	147.923	47.8268	43.5383	45.2273	24.0348	35.0027	42.0163
Prlr	ENSMUSG00000005268	29.5923	53.7396	80.0829	84.7043	3.00343	28.576	75.0386	206.594	42.4583	60.5677	142.07	139.75
Letm1	ENSMUSG00000005299	632.536	507.698	299.665	317.226	325.121	349.635	484.865	315.013	322.129	363.406	312.965	471.313
Ubqln1	ENSMUSG00000005312	327.365	203.645	226.471	174.391	209.489	140.358	253.977	150.25	160.603	202.854	154.424	164.411
Fgfr4	ENSMUSG00000005320	0	2.8284	0	0	0	0.84047	2.4738	3.41477	0	3.84557	1.02949	0.913397
Cadm3	ENSMUSG00000005338	1.84952	2.8284	0	0	0	4.20235	2.4738	2.56108	0.923007	0	8.23593	0.913397
Fcer1a	ENSMUSG00000005339	0	0	0	0	0	0	0	0	0	0	0	0
Txn2	ENSMUSG00000005354	186.801	117.379	80.944	275.704	165.189	437.044	390.036	343.184	307.361	303.8	310.906	427.47
Casp14	ENSMUSG00000005355	7.39808	0	0	0	0	0	0	0	0	0	1.02949	0
Slc1a6	ENSMUSG00000005357	0	0	0	0	0	0	2.4738	0	0	0	0	0.913397
Slc1a3	ENSMUSG00000005360	14.7962	114.55	12.0555	26.5739	9.01028	19.3308	15.6674	28.1719	24.9212	12.4981	15.4424	9.13397
Crbn	ENSMUSG00000005362	62.8837	41.0118	37.0276	80.5521	114.881	100.856	131.936	87.9304	90.4546	62.4905	113.244	144.317
Il5ra	ENSMUSG00000005364	0	0	3.44443	0.830434	0	0	1.6492	0	2.76902	2.88418	6.17695	10.0474
Msh6	ENSMUSG00000005370	62.8837	79.1953	338.415	112.109	130.649	116.825	79.1616	122.078	130.144	185.549	181.19	116.001
Fbxo11	ENSMUSG00000005371	62.8837	76.3669	245.415	382.83	454.268	215.16	244.082	373.064	420.891	326.873	365.469	263.972
Mlxipl	ENSMUSG00000005373	19677	13707.9	7179.91	6420.92	7935.81	6095.09	3017.21	7527.01	7140.38	7236.4	5202.02	5496.82
Tbl2	ENSMUSG00000005374	83.2284	22.6272	84.3884	248.3	166.69	53.7901	115.444	78.5397	140.297	123.058	183.249	96.8201
Wbscr22	ENSMUSG00000005378	42.5389	86.2663	117.972	152.8	90.8537	90.7707	89.0568	117.81	97.8387	52.8766	134.863	97.7335
Nid1	ENSMUSG00000005397	22.1942	149.905	46.4998	254.943	38.2937	154.646	293.558	80.2471	150.45	100.946	127.657	103.214
Mcm5	ENSMUSG00000005410	11.0971	28.284	6.88885	64.7739	32.2868	31.0974	34.6332	43.5383	54.4574	60.5677	71.0349	59.3708
Hmox1	ENSMUSG00000005413	77.6798	35.355	17.2221	84.7043	58.5668	44.5449	6.5968	28.1719	41.5353	12.4981	9.26542	1.82679
Mprip	ENSMUSG00000005417	8124.94	6141.88	3591.68	2642.44	3482.47	2844.15	1390.28	2710.47	2642.57	2697.67	2086.78	1681.56
Cic	ENSMUSG00000005442	7751.34	6256.43	2717.65	1810.35	2078.37	2004.52	1090.95	1483.72	1994.62	1578.61	1273.48	1111.6
Pafah1b3	ENSMUSG00000005447	18.4952	5.65681	12.0555	1.66087	2.25257	3.36188	1.6492	2.56108	0	9.61393	10.2949	3.65359
Il27ra	ENSMUSG00000005465	157.209	0	0	24.913	39.7954	14.288	0.8246	7.68323	4.61503	4.80696	1.02949	0.913397
Prkaca	ENSMUSG00000005469	240.437	377.592	384.053	293.974	230.513	238.693	139.357	238.18	315.668	243.232	203.839	312.382
Asf1b	ENSMUSG00000005470	0	0	1.72221	0	3.75428	0	4.9476	0	6.46105	1.92279	7.20644	2.74019
Myl10	ENSMUSG00000005474	0	0	0	0	0	0	0	0	0	0	0	0
Ddx39	ENSMUSG00000005481	406.894	386.077	55.9719	151.139	189.967	143.72	84.1092	148.543	146.758	98.062	113.244	90.4263
Dnajb1	ENSMUSG00000005483	318.117	470.929	52.5275	132.87	196.724	68.078	32.1594	126.347	142.143	104.792	197.662	164.411
Msh4	ENSMUSG00000005493	11.0971	1.4142	1.72221	44.8435	2.25257	14.288	3.2984	12.8054	8.30706	19.2279	10.2949	10.0474
Usp40	ENSMUSG00000005501	747.206	441.231	1579.27	1106.97	990.38	862.322	1197.32	1134.56	1065.15	1098.87	1608.07	1196.55
Evx1	ENSMUSG00000005503	0	0	1.72221	0	3.75428	0	0.8246	0.853693	0	1.92279	1.02949	0
Kbtbd4	ENSMUSG00000005505	11.0971	18.3846	29.2776	24.0826	39.7954	25.2141	131.936	28.1719	19.3831	33.6487	63.8285	29.2287
Celf1	ENSMUSG00000005506	1109.71	909.331	1610.27	1294.65	979.117	1234.65	1737.43	876.742	918.392	669.129	1019.2	941.712
Ndufs3	ENSMUSG00000005510	125.767	145.663	313.443	480.822	336.384	329.464	659.68	496.849	384.894	741.234	661.963	674.087
Por	ENSMUSG00000005514	440.186	212.13	477.053	388.643	322.118	193.308	216.87	342.331	373.818	251.885	352.086	294.114
Igf1r	ENSMUSG00000005533	3991.26	3613.28	3719.12	1993.04	3468.96	1752.38	763.58	1567.38	2063.84	587.411	690.789	627.504
Insr	ENSMUSG00000005534	7910.39	5863.28	9653.86	7138.41	7425.97	7805.44	9033.49	8640.22	7928.63	8628.5	8510.8	8174.9
Fcer2a	ENSMUSG00000005540	1.84952	0	1.72221	2.4913	7.50857	29.4164	38.7562	4.26846	7.38405	33.6487	21.6193	31.0555
Cyp2a5	ENSMUSG00000005547	5.54856	0	0	4.98261	5.256	0.84047	0.8246	0	2.76902	0	0	1.82679
Atp4a	ENSMUSG00000005553	1.84952	22.6272	3.44443	11.6261	0.750857	3.36188	4.123	5.97585	0	1.92279	1.02949	8.22057
Trim28	ENSMUSG00000005566	699.118	499.213	172.221	504.074	517.34	384.095	295.207	441.359	434.736	306.684	268.697	437.517
Ube2m	ENSMUSG00000005575	769.4	709.929	498.581	342.969	446.009	402.585	202.852	388.43	405.2	534.534	236.783	316.949
Adcy9	ENSMUSG00000005580	432.787	567.095	625.163	309.752	337.886	642.119	419.721	313.305	357.204	385.518	262.52	381.8
Mef2c	ENSMUSG00000005583	436.487	719.828	853.357	463.382	744.85	687.504	547.534	422.578	772.557	309.568	319.142	300.508
Ctr9	ENSMUSG00000005609	1450.02	503.456	392.665	483.313	346.145	376.53	407.352	380.747	310.13	377.827	342.821	382.713
Eif4g2	ENSMUSG00000005610	1093.07	2244.34	2980.29	3525.19	2947.11	2292.8	2864.66	3284.16	3389.28	2505.39	3012.29	3290.06
Mrvi1	ENSMUSG00000005611	66.5827	80.6095	24.9721	19.1	30.0343	56.3115	13.1936	27.3182	34.1512	21.1506	54.563	31.9689
Pcyt1a	ENSMUSG00000005615	536.361	271.527	685.441	382.83	325.121	557.231	559.903	288.548	321.206	446.086	579.604	531.597
Zfp592	ENSMUSG00000005621	1771.84	1634.82	2294.85	948.356	1448.4	864.843	1009.31	1054.31	1159.3	1145.02	807.121	873.208
Psmd4	ENSMUSG00000005625	186.801	94.7515	464.998	216.743	276.315	159.689	126.988	268.06	254.75	194.201	183.249	183.593
Tmod4	ENSMUSG00000005628	3.69904	0	2.58332	33.2174	24.7783	17.6499	54.4236	46.9531	18.4601	51.9152	46.3271	39.2761
Insrr	ENSMUSG00000005640	72.1312	46.6686	9.47217	6.64348	7.50857	3.36188	0.8246	0	0	1.92279	0	0
Cabp5	ENSMUSG00000005649	0	1.4142	0	0	3.75428	0	0.8246	0	0	0	0	0
Snx6	ENSMUSG00000005656	257.083	161.219	140.36	337.156	311.606	158.008	171.517	324.403	305.515	211.506	289.287	268.539
Mthfd2	ENSMUSG00000005667	1.84952	0	32.722	0.830434	21.7748	7.56423	5.7722	3.41477	0.923007	0.961393	4.11796	2.74019
Kit	ENSMUSG00000005672	0	4.2426	2.58332	0.830434	17.2697	16.8094	1.6492	0.853693	15.6911	3.84557	1.02949	6.39378
Tomm40l	ENSMUSG00000005674	7.39808	15.5562	24.111	19.1	6.75771	42.0235	41.23	26.4645	21.2292	20.1892	18.5308	20.0947
Nr1i3	ENSMUSG00000005677	0	14.142	5.16664	4.98261	6.00685	5.88329	5.7722	4.26846	13.8451	7.69114	25.7373	37.4493
Apoa2	ENSMUSG00000005681	0	0	0	3.32174	1.50171	0.84047	0	0	0.923007	0	1.02949	0
Pan2	ENSMUSG00000005682	1622.03	1801.69	867.134	765.661	858.98	1138	976.326	738.444	715.33	921.014	670.199	759.946
Cs	ENSMUSG00000005683	68.4322	328.095	337.554	760.678	699.799	710.197	1368.84	942.477	781.787	707.585	807.121	815.664
Ampd3	ENSMUSG00000005686	1616.48	970.142	1528.46	700.056	1208.88	873.248	427.143	514.777	840.859	465.314	331.496	557.172
Bcas2	ENSMUSG00000005687	12.9466	36.7692	91.2773	136.191	90.1028	53.7901	276.241	52.0753	79.3786	79.7956	186.338	92.2531
Sh2d1a	ENSMUSG00000005696	0	1.4142	1.72221	5.81304	1.50171	2.52141	3.2984	0.853693	0.923007	0	0	0.913397
Ctcf	ENSMUSG00000005698	1442.62	933.373	758.635	509.056	488.808	493.356	526.919	496.849	561.188	541.264	390.177	501.455
Pard6a	ENSMUSG00000005699	1.84952	11.3136	0.861106	7.47391	5.256	4.20235	0	4.26846	3.69203	2.88418	26.7668	9.13397
Agrp	ENSMUSG00000005705	16.6457	19.7988	124.86	4.15217	0.750857	20.1713	14.0182	8.53693	1.84601	12.4981	13.3834	36.5359
Pvalb	ENSMUSG00000005716	0	0	0.861106	0	0	0	0	0.853693	0	0	0	0
Tfap4	ENSMUSG00000005718	27.7428	43.8402	123.999	15.7783	42.048	6.72376	42.0546	19.6349	16.6141	42.3013	44.2681	46.5833
Ranbp1	ENSMUSG00000005732	57.3351	21.213	13.7777	93.8391	66.8263	61.3543	18.9658	92.1988	61.8414	47.1082	66.9169	39.2761
Cd247	ENSMUSG00000005763	0	0	1.72221	0	0	1.68094	0.8246	2.56108	0	0.961393	5.14746	4.56699
Rfx5	ENSMUSG00000005774	53.6361	65.0533	38.7498	168.578	122.39	66.3971	103.9	191.227	126.452	108.637	134.863	98.6469
Psmb4	ENSMUSG00000005779	0	0	23.2499	52.3174	6.75771	15.9689	38.7562	36.7088	29.5362	7.69114	35.0027	43.8431
Mmp8	ENSMUSG00000005800	0	0	0	0	0	0	0	0	0	0	0	0
Slc30a4	ENSMUSG00000005802	27.7428	4.2426	43.9164	75.5695	73.584	45.3854	20.615	79.3934	80.3016	22.112	35.0027	25.5751
Sqrdl	ENSMUSG00000005803	0	1.4142	74.0552	29.8956	18.7714	44.5449	24.738	17.9275	23.9982	12.4981	28.8258	17.3545
Bloc1s6	ENSMUSG00000005804	131.316	120.207	266.943	159.443	283.073	222.724	360.35	186.959	143.066	86.5253	99.8606	198.207
Metap1	ENSMUSG00000005813	750.905	39.5976	489.97	173.561	197.475	251.3	263.872	141.713	212.292	96.1393	210.016	242.05
Gpr108	ENSMUSG00000005823	771.25	1537.24	928.273	565.526	497.067	470.663	390.036	471.238	533.498	407.63	429.298	337.044
Tnfsf14	ENSMUSG00000005824	0	0	0	0	0	0	0	1.70739	0	0	0	0
Gata6	ENSMUSG00000005836	1361.25	1774.82	699.218	1024.76	1620.35	871.567	1024.15	1208.83	1045.77	1084.45	1017.14	1076.9
Rsl1d1	ENSMUSG00000005846	538.21	482.243	155.86	386.152	516.59	319.378	455.179	591.609	400.585	524.92	503.421	414.682
Cnga2	ENSMUSG00000005864	0	0	0	0	0	0	0	0	0	0	0	0.913397
Apc	ENSMUSG00000005871	8128.64	5334.37	4083.37	3286.03	4432.31	3233.29	2092.01	3185.13	3834.17	3304.31	3274.81	3118.34
Reep5	ENSMUSG00000005873	42.5389	103.237	123.999	59.7913	93.8571	115.144	267.995	55.49	106.146	99.9848	196.633	193.64
Ergic3	ENSMUSG00000005881	18.4952	234.757	84.3884	112.939	47.304	68.9185	107.198	58.9048	70.1485	35.5715	58.681	82.2057
Uqcc1	ENSMUSG00000005882	116.52	340.823	553.691	710.021	551.129	708.516	1424.91	708.565	596.262	684.511	739.175	761.773
Spo11	ENSMUSG00000005883	0	0	0.861106	24.913	1.50171	36.1402	5.7722	17.9275	11.0761	25.9576	23.6783	17.3545
Ncoa2	ENSMUSG00000005886	1474.07	1767.75	1512.96	1276.38	1226.15	982.509	1364.71	1122.61	1164.83	1139.25	994.489	1029.4
Prl4a1	ENSMUSG00000005891	0	0	0	0	0	0	0	0	0	0	0	0
Trh	ENSMUSG00000005892	0	0	0	0	0	0	0	0	0	0	0	0
Nr2c2	ENSMUSG00000005893	1662.72	1053.58	415.053	543.104	535.361	672.376	587.115	663.319	579.648	439.356	640.344	556.259
Nr2c1	ENSMUSG00000005897	40.6894	558.61	24.9721	184.356	297.339	167.253	175.64	255.254	249.212	187.472	132.804	224.696
Smpd4	ENSMUSG00000005899	924.76	1073.38	677.691	613.691	650.993	643.8	730.596	646.245	636.875	858.524	724.762	663.126
Pex1	ENSMUSG00000005907	183.102	128.692	174.805	559.713	635.976	336.188	531.867	507.094	505.808	452.816	420.032	533.424
Otx1	ENSMUSG00000005917	36.9904	18.3846	12.9166	7.47391	5.256	15.1285	9.8952	5.97585	2.76902	2.88418	3.08847	5.48038
Kctd20	ENSMUSG00000005936	24.0437	110.308	155.86	266.569	184.711	221.884	198.729	232.204	229.829	232.657	237.812	210.995
Itgae	ENSMUSG00000005947	0	8.48521	0.861106	36.5391	6.75771	9.24517	10.7198	7.68323	12.9221	2.88418	3.08847	6.39378
Ctns	ENSMUSG00000005949	101.724	281.426	137.777	152.8	186.212	136.997	178.938	130.615	119.068	144.209	188.397	236.57
P2rx5	ENSMUSG00000005950	1252.12	1370.36	362.526	771.474	677.273	452.173	427.967	645.392	664.565	501.847	432.386	470.4
Shpk	ENSMUSG00000005951	20.3447	0	1.72221	3.32174	3.75428	40.3425	18.9658	16.2202	2.76902	3.84557	6.17695	12.7876
Trpv1	ENSMUSG00000005952	7.39808	0	0	0	0	1.68094	0	0	0.923007	0	2.05898	11.8742
Ephb3	ENSMUSG00000005958	49.937	65.0533	72.3329	83.0434	111.878	226.086	173.166	99.0284	111.684	241.31	215.164	93.1665
Tuft1	ENSMUSG00000005968	1.84952	4.2426	0	0	0	0.84047	0	0	1.84601	2.88418	5.14746	0.913397
Rcn1	ENSMUSG00000005973	36.9904	28.284	32.722	68.0956	30.7851	17.6499	49.476	40.9773	57.2264	21.1506	38.0912	16.4411
Dnase1	ENSMUSG00000005980	18.4952	57.9823	185.138	85.5347	23.2766	200.032	37.107	37.5625	28.6132	39.4171	82.3593	43.8431
Trap1	ENSMUSG00000005981	146.112	214.959	865.412	453.417	307.851	412.671	639.065	361.966	416.276	361.484	365.469	299.594
Naa60	ENSMUSG00000005982	18.4952	253.142	230.777	143.665	171.946	180.701	355.403	178.422	114.453	383.596	270.756	267.625
1700037C18Rik	ENSMUSG00000005983	7.39808	14.142	49.0831	19.9304	21.7748	60.5138	60.1958	25.6108	37.8433	43.2627	29.8552	35.6225
Ankrd13d	ENSMUSG00000005986	0	39.5976	20.6666	12.4565	7.50857	23.5331	4.123	11.9517	14.7681	59.6063	15.4424	41.1029
Tyrp1	ENSMUSG00000005994	0	0	0	0	0	0	0	0	0	0	0	0
Tpr	ENSMUSG00000006005	5524.51	3642.98	3515.04	4385.52	5225.96	3652.68	3195.33	4659.46	5156.84	5479.94	4687.27	4072.84
Pdc	ENSMUSG00000006007	0	0	0	0	0	0	0	0	0	0	0	0
BC003331	ENSMUSG00000006010	164.607	132.935	228.193	457.569	322.118	185.744	366.122	490.873	355.358	439.356	480.772	601.929
Prg4	ENSMUSG00000006014	236.738	592.55	54.2497	28.2348	175.7	24.3736	59.3712	46.9531	200.292	34.6101	14.4129	42.0163
Dhx34	ENSMUSG00000006019	523.414	434.16	383.192	269.061	192.97	277.355	162.446	215.131	172.602	285.534	192.515	131.529
Kptn	ENSMUSG00000006021	29.5923	38.1834	159.305	141.174	131.4	175.658	214.396	135.737	167.064	206.699	106.038	111.434
Napa	ENSMUSG00000006024	1046.83	380.42	532.164	531.478	543.62	434.523	497.234	593.316	476.271	597.986	400.472	345.264
Sra1	ENSMUSG00000006050	81.3788	280.012	274.693	423.522	307.851	333.666	467.548	298.792	340.589	352.831	291.346	263.058
Calcoco2	ENSMUSG00000006056	0	0	0	2.4913	0	0	0	2.56108	3.69203	0	1.02949	0
Atp5g1	ENSMUSG00000006057	118.369	168.29	340.998	467.535	287.578	336.188	1096.72	575.389	447.658	501.847	1017.14	936.232
Snf8	ENSMUSG00000006058	11.0971	33.9408	247.138	60.6217	41.2971	50.4282	37.9316	29.8792	44.3043	28.8418	45.2976	59.3708
Tbcb	ENSMUSG00000006095	1.84952	15.5562	13.7777	56.4695	63.072	50.4282	14.8428	45.2457	45.2273	8.65253	50.4451	29.2287
Inpp5k	ENSMUSG00000006127	264.481	369.107	570.052	459.23	408.466	479.068	464.25	314.159	323.052	405.708	479.743	447.565
Crkl	ENSMUSG00000006134	138.714	257.385	205.804	225.048	207.236	358.04	542.587	218.545	215.061	254.769	271.786	192.727
Upk3bl	ENSMUSG00000006143	0	0	0	0	0	0	0	0	0	0.961393	0	0
Eps8l1	ENSMUSG00000006154	0	21.213	8.61106	5.81304	12.7646	10.0856	11.5444	0	8.30706	4.80696	3.08847	10.9608
Clint1	ENSMUSG00000006169	1518.46	1030.95	517.525	538.952	611.948	595.052	669.575	573.682	606.415	730.658	724.762	495.061
Prss16	ENSMUSG00000006179	0	0	0	0	0	0	0	0	0	0	0	0
Cdkal1	ENSMUSG00000006191	220.093	173.947	325.498	562.204	337.886	391.659	786.668	668.441	551.958	540.303	622.842	807.443
Rhox6	ENSMUSG00000006200	0	0	0	0	0	0	0	0	0	0	0	0
5430419D17Rik	ENSMUSG00000006204	602.943	179.604	269.526	106.296	132.902	72.2804	106.373	72.5639	48.9194	20.1892	15.4424	34.7091
Htra1	ENSMUSG00000006205	123.918	24.0414	7.74996	47.3348	53.3108	59.6733	60.1958	59.7585	103.377	59.6063	85.4478	90.4263
Zbtb17	ENSMUSG00000006215	1052.38	1241.67	316.026	230.03	312.356	184.903	127.813	288.548	252.904	306.684	171.925	246.617
Clcnkb	ENSMUSG00000006216	131.316	55.1539	13.7777	4.98261	1.50171	7.56423	18.1412	4.26846	3.69203	11.5367	0	4.56699
Fam131c	ENSMUSG00000006218	22.1942	0	6.02775	0	6.75771	0	4.9476	11.098	0	18.2665	8.23593	2.74019
Fblim1	ENSMUSG00000006219	4309.38	7226.57	7598.4	3497.79	2851	4682.26	4703.52	4683.36	3402.2	7595	5003.33	6374.6
Hspb7	ENSMUSG00000006221	37082.9	24465.7	11612.9	11236.6	11811.7	7829.81	6032.77	9523.8	9984.16	12886.5	9167.62	9481.98
Epor	ENSMUSG00000006235	18.4952	0	0	0	0	1.68094	10.7198	0	4.61503	9.61393	0	21.9215
Ccdc159	ENSMUSG00000006241	279.277	227.686	95.5828	58.9608	141.912	116.825	204.501	113.541	107.069	143.247	135.893	179.939
Mob1b	ENSMUSG00000006262	168.306	131.521	272.971	345.461	360.411	397.542	777.598	356.844	332.282	213.429	476.654	411.942
Atp6v1b1	ENSMUSG00000006269	5.54856	0	8.61106	0.830434	0.750857	4.20235	0	1.70739	8.30706	4.80696	4.11796	6.39378
Vax1	ENSMUSG00000006270	1.84952	2.8284	0	0	0	0	0	0.853693	0	0	0	0
Atp6v1b2	ENSMUSG00000006273	334.763	145.663	449.498	229.2	201.23	256.343	393.334	246.717	237.213	196.124	229.577	234.743
Eps15l1	ENSMUSG00000006276	5263.73	4024.82	2687.51	2147.5	2346.43	1884.33	1669.82	2590.1	2686.87	3317.77	2602.55	2396.75
Tep1	ENSMUSG00000006281	1455.57	1750.78	1055.72	773.134	789.151	652.204	437.038	686.369	731.021	345.14	305.759	337.044
Ttc5	ENSMUSG00000006288	77.6798	33.9408	78.3607	71.4174	135.154	48.7472	183.886	87.9304	83.0706	56.7222	62.799	80.3789
Osgep	ENSMUSG00000006289	9.2476	97.5799	113.666	89.6869	93.1062	125.23	131.111	75.9787	88.6086	193.24	188.397	138.836
Aamp	ENSMUSG00000006299	279.277	65.0533	102.472	78.0608	93.1062	82.366	75.8632	97.321	58.1494	53.838	67.9464	63.9378
Tmbim1	ENSMUSG00000006301	835.983	1250.15	1075.52	1093.68	991.882	1094.29	1242.67	738.444	1060.53	978.698	1298.19	1192.9
Arpc2	ENSMUSG00000006304	142.413	202.231	139.499	222.556	238.772	121.868	173.166	176.714	191.985	127.865	110.156	118.742
Kmt2b	ENSMUSG00000006307	6060.87	4413.72	2598.82	1449.94	1789.29	1427.96	729.771	1265.17	1346.67	1498.81	1002.72	1109.78
Zbtb32	ENSMUSG00000006310	3.69904	22.6272	0	3.32174	5.256	5.88329	6.5968	12.8054	18.4601	14.4209	8.23593	15.5278
Etv2	ENSMUSG00000006311	0	7.07101	0	0	0	0	0	0	0	0	0	0
Upk1a	ENSMUSG00000006313	7.39808	38.1834	11.1944	29.8956	23.2766	22.6927	42.8792	29.0256	8.30706	63.4519	15.4424	56.6306
Tmem147	ENSMUSG00000006315	53.6361	14.142	18.9443	79.7217	36.792	57.1519	70.091	76.8323	58.1494	86.5253	116.333	62.111
Rps9	ENSMUSG00000006333	9.2476	1.4142	71.4718	86.3652	129.147	40.3425	116.269	106.712	83.0706	155.746	73.0939	105.041
Tfpt	ENSMUSG00000006335	40.6894	28.284	83.5273	56.4695	60.0685	134.475	104.724	65.7343	51.6884	144.209	68.9759	87.6861
Susd2	ENSMUSG00000006342	0	35.355	0	22.4217	24.0274	89.9302	6.5968	49.5142	18.4601	49.9924	0	21.9215
Ggt5	ENSMUSG00000006344	5.54856	7.07101	3.44443	24.0826	5.256	2.52141	12.369	5.97585	1.84601	29.8032	33.9732	16.4411
Ggt1	ENSMUSG00000006345	0	0	0	0	0.750857	0	0	3.41477	0	0	0	0
Crip2	ENSMUSG00000006356	471.627	367.692	349.609	683.448	478.296	378.211	304.277	779.422	808.554	620.098	363.41	320.602
Crip1	ENSMUSG00000006360	0	0	1.72221	3.32174	15.768	0	10.7198	5.12216	4.61503	8.65253	2.05898	9.13397
Cbfa2t3	ENSMUSG00000006362	173.855	531.74	46.4998	27.4043	21.7748	38.6616	122.041	92.1988	44.3043	245.155	265.609	229.263
Fbln1	ENSMUSG00000006369	33.2913	237.586	27.5554	83.0434	22.5257	66.3971	108.023	23.0497	63.6875	91.3323	58.681	47.4966
Pgrmc1	ENSMUSG00000006373	1.84952	7.07101	5.16664	8.30434	0.750857	6.72376	4.123	12.8054	15.6911	16.3437	3.08847	2.74019
NA	ENSMUSG00000006378	0	0	0	4.98261	7.50857	0.84047	1.6492	1.70739	0	12.4981	9.26542	3.65359
Tek	ENSMUSG00000006386	0	134.349	1.72221	80.5521	23.2766	13.4475	53.599	39.2699	33.2282	35.5715	72.0644	55.7172
Mpl	ENSMUSG00000006389	0	0	0	0	0.750857	0	0	1.70739	0	17.3051	0	0
Elovl1	ENSMUSG00000006390	9.2476	65.0533	48.222	63.9434	95.3588	46.2258	35.4578	62.3196	51.6884	13.4595	9.26542	6.39378
Med8	ENSMUSG00000006392	0	93.3373	18.9443	107.956	60.0685	84.047	71.7402	138.298	102.454	64.4133	116.333	63.0244
Hyi	ENSMUSG00000006395	105.423	97.5799	66.3052	58.9608	87.0994	43.7044	18.1412	15.3665	47.0733	41.3399	65.8874	24.6617
Cdc20	ENSMUSG00000006398	0	2.8284	0	0	0	0	5.7722	0	4.61503	0.961393	0	0
Adamts4	ENSMUSG00000006403	234.889	59.3965	2.58332	20.7609	24.7783	18.4903	4.9476	14.5128	43.3813	0.961393	4.11796	0
Pvrl4	ENSMUSG00000006411	1.84952	4.2426	0.861106	4.98261	2.25257	0	1.6492	2.56108	0	0	4.11796	3.65359
Pfdn2	ENSMUSG00000006412	229.34	82.0237	153.277	67.2652	80.3417	68.9185	35.4578	81.9545	41.5353	76.9114	65.8874	84.9459
Rnf114	ENSMUSG00000006418	66.5827	229.101	199.777	215.083	272.561	351.316	206.975	257.815	206.753	272.074	235.753	214.648
C330007P06Rik	ENSMUSG00000006423	62.8837	155.562	161.027	147.817	168.943	165.573	235.836	118.663	149.527	134.595	185.308	210.081
Neurl1a	ENSMUSG00000006435	66.5827	31.1124	23.2499	38.2	3.75428	29.4164	9.8952	26.4645	25.8442	14.4209	12.3539	13.701
Srm	ENSMUSG00000006442	147.962	207.888	63.7219	53.9782	105.12	37.8211	34.6332	53.7826	57.2264	47.1082	12.3539	59.3708
Epha2	ENSMUSG00000006445	68.4322	106.065	145.527	26.5739	99.1131	121.028	26.3872	67.4417	67.3795	54.7994	65.8874	18.2679
Rbm14	ENSMUSG00000006456	270.03	135.763	481.359	267.4	286.827	448.811	688.541	227.082	281.517	286.495	315.024	359.878
Actn3	ENSMUSG00000006457	35.1409	7.07101	1.72221	6.64348	6.00685	2.52141	7.4214	7.68323	2.76902	6.72975	4.11796	3.65359
A530013C23Rik	ENSMUSG00000006462	11.0971	62.2249	105.916	59.7913	25.5291	150.444	204.501	41.8309	74.7635	36.5329	42.2091	55.7172
Zdhhc24	ENSMUSG00000006463	42.5389	118.793	32.722	71.4174	91.6045	98.3349	19.7904	70.0028	42.4583	44.2241	78.2413	36.5359
Bbs1	ENSMUSG00000006464	88.7769	397.391	113.666	146.987	182.458	268.11	174.815	150.25	152.296	101.908	77.2118	116.001
Slc34a3	ENSMUSG00000006469	0	1.4142	0	0	0	0	0	0	0	0	0	0
Ndor1	ENSMUSG00000006471	288.525	289.911	545.08	138.683	167.441	400.064	261.398	173.3	181.832	131.711	141.04	166.238
Nsmf	ENSMUSG00000006476	1294.66	480.828	470.164	521.513	557.136	642.959	399.106	369.649	513.192	228.811	324.29	365.359
Prl7a1	ENSMUSG00000006488	0	0	0	0	0	0	0	0	0	0	0	0
Prl8a9	ENSMUSG00000006490	0	0	0	0	0	0	0	0	0.923007	0	0	0
Pdk1	ENSMUSG00000006494	11.0971	270.112	756.051	484.974	494.815	467.301	561.553	467.824	397.816	401.862	543.571	718.844
Ptbp1	ENSMUSG00000006498	1527.7	920.645	561.441	504.904	536.112	568.157	291.084	383.308	390.432	425.897	396.354	375.406
Mvd	ENSMUSG00000006517	86.9274	38.1834	55.1108	21.5913	15.768	27.7355	31.3348	11.098	12.9221	63.4519	64.8579	27.4019
Cyba	ENSMUSG00000006519	0	0	0	5.81304	0	11.7666	0	11.098	2.76902	0	17.5014	5.48038
Itih3	ENSMUSG00000006522	0	0	0	3.32174	0	1.68094	0	0	0.923007	3.84557	8.23593	0.913397
Tmem110	ENSMUSG00000006526	258.933	100.408	30.1387	74.7391	33.0377	86.5684	60.1958	38.4162	72.9175	23.0734	112.215	32.8823
Sfmbt1	ENSMUSG00000006527	118.369	264.456	58.5552	124.565	123.141	158.849	103.075	99.8821	139.374	78.8342	93.6837	80.3789
Itih1	ENSMUSG00000006529	1.84952	1.4142	0	0	0	0	0	0	0.923007	0	0	0
Ihh	ENSMUSG00000006538	20.3447	0	15.4999	0	6.00685	3.36188	0	6.82954	2.76902	0	0	0.913397
Prkag3	ENSMUSG00000006542	1128.21	439.817	387.498	263.248	443.756	284.079	232.537	258.669	264.903	192.279	141.04	104.127
Cryba2	ENSMUSG00000006546	0	0	9.47217	0	0.750857	0	1.6492	1.70739	3.69203	0.961393	2.05898	0
Atp7b	ENSMUSG00000006567	42.5389	1.4142	0	0.830434	0	0.84047	14.8428	0	5.53804	0.961393	4.11796	0.913397
Defb2	ENSMUSG00000006570	0	0	0	0	0	0	0	0	0	0	0	0
Slc4a1	ENSMUSG00000006574	0	2.8284	0	0	0	0	0	0	0	0	1.02949	0
Rundc3a	ENSMUSG00000006575	12.9466	0	0.861106	2.4913	2.25257	10.0856	3.2984	9.39062	6.46105	58.6449	19.5603	18.2679
Slc4a3	ENSMUSG00000006576	17326.3	11786	10046.5	5387.03	5426.44	7089.36	5477.82	7805.31	6025.39	9436.07	6072.97	6034.81
Cdt1	ENSMUSG00000006585	1.84952	9.89941	0.861106	0	3.00343	0	0	0	2.76902	0	1.02949	5.48038
Runx1t1	ENSMUSG00000006586	53.6361	231.929	45.6386	36.5391	53.3108	79.8446	63.4942	25.6108	101.531	164.398	86.4773	214.648
Snai3	ENSMUSG00000006587	0	0	0	0	8.25943	2.52141	6.5968	5.12216	2.76902	6.72975	16.4719	8.22057
Aprt	ENSMUSG00000006589	11.0971	25.4556	0.861106	69.7565	49.5566	10.9261	32.1594	19.6349	24.9212	12.4981	30.8847	40.1895
Gtf2h1	ENSMUSG00000006599	9.2476	33.9408	61.1386	121.243	102.117	52.9496	155.025	160.494	132.913	149.016	147.217	116.001
Hfe	ENSMUSG00000006611	9.2476	4.2426	10.3333	5.81304	9.76114	9.24517	17.3166	28.1719	3.69203	10.5753	11.3244	4.56699
Abhd1	ENSMUSG00000006638	0	0	0	0	0	0	0.8246	0.853693	0.923007	0.961393	1.02949	0
Slc5a6	ENSMUSG00000006641	77.6798	9.89941	128.305	85.5347	50.3074	27.7355	111.321	52.0753	97.8387	65.3747	59.7105	27.4019
Tcf23	ENSMUSG00000006642	0	1.4142	0	0.830434	0	0.84047	7.4214	0.853693	0.923007	0.961393	7.20644	0
Nphs1	ENSMUSG00000006649	0	1.4142	1.72221	3.32174	6.75771	2.52141	1.6492	3.41477	0.923007	7.69114	1.02949	5.48038
Aplp1	ENSMUSG00000006651	1.84952	4.2426	0	15.7783	3.00343	0	0	17.9275	0	0	0	2.74019
Qrich1	ENSMUSG00000006673	5258.18	3085.79	2176.02	1067.11	1308.74	986.711	1222.06	1429.94	1275.6	1837.22	969.781	946.279
P4htm	ENSMUSG00000006675	20.3447	57.9823	27.5554	44.013	24.7783	53.7901	9.8952	57.1974	47.9963	39.4171	44.2681	23.7483
Usp19	ENSMUSG00000006676	6366.05	4538.17	2278.49	1511.39	1345.54	2065.03	1772.89	1566.53	1366.97	2112.18	1131.41	1361.88
Pola1	ENSMUSG00000006678	49.937	26.8698	250.582	120.413	130.649	69.759	61.845	120.371	116.299	183.626	88.5362	145.23
Cdc42	ENSMUSG00000006699	543.759	57.9823	164.471	225.048	253.79	181.541	253.152	207.447	256.596	111.522	164.719	160.758
Pknox1	ENSMUSG00000006705	135.015	33.9408	103.333	110.448	68.328	79.0041	132.761	72.5639	67.3795	32.6873	76.1823	61.1976
D130043K22Rik	ENSMUSG00000006711	0	8.48521	9.47217	0.830434	3.00343	3.36188	0.8246	1.70739	3.69203	0.961393	0	4.56699
Gmnn	ENSMUSG00000006715	0	1.4142	0	31.5565	1.50171	6.72376	26.3872	15.3665	13.8451	35.5715	33.9732	30.1421
Acot13	ENSMUSG00000006717	0	39.5976	52.5275	57.3	51.8091	64.7162	79.1616	75.9787	107.069	79.7956	125.598	116.915
Zfp184	ENSMUSG00000006720	0	0	0	0.830434	3.75428	5.04282	0	0	0	11.5367	2.05898	12.7876
Cyp27b1	ENSMUSG00000006724	0	1.4142	8.61106	1.66087	0	4.20235	0	0.853693	0	5.76836	38.0912	11.8742
Cdk4	ENSMUSG00000006728	38.8399	125.864	270.387	199.304	320.616	166.413	384.264	198.91	183.678	210.545	334.585	186.333
B4galnt1	ENSMUSG00000006731	3.69904	36.7692	43.0553	45.6739	64.5737	115.985	0	35.8551	67.3795	70.1817	10.2949	5.48038
Mettl1	ENSMUSG00000006732	417.991	295.568	228.193	69.7565	125.393	200.872	81.6354	104.151	114.453	81.7184	75.1529	68.5048
Tspan31	ENSMUSG00000006736	0	11.3136	17.2221	36.5391	21.024	31.0974	37.9316	20.4886	34.1512	24.9962	8.23593	30.1421
Kif5b	ENSMUSG00000006740	3373.52	2118.47	1439.77	2305.29	2344.93	1557.39	1555.2	2371.56	2031.54	1530.54	1244.65	1466
Saal1	ENSMUSG00000006763	70.2817	49.497	36.1665	239.165	160.683	156.327	200.378	180.129	127.375	101.908	170.896	159.844
Tph2	ENSMUSG00000006764	0	0	0	0	0	0	8.246	0	0	0	0	0
Krt23	ENSMUSG00000006777	0	0	0	0	0	0	0	0	0	0	0	0
Cnp	ENSMUSG00000006782	1.84952	7.07101	14.6388	26.5739	13.5154	34.4593	49.476	17.0739	35.9973	49.9924	26.7668	30.1421
Ttc25	ENSMUSG00000006784	3.69904	145.663	7.74996	18.2696	12.7646	18.4903	4.9476	8.53693	4.61503	23.0734	12.3539	15.5278
Sulf2	ENSMUSG00000006800	2084.41	2368.79	1371.74	1178.39	1402.6	1118.67	633.293	1090.17	1154.68	749.886	348.998	454.872
Sod2	ENSMUSG00000006818	42.5389	159.805	310.859	308.922	296.588	391.659	816.354	274.889	373.818	675.859	858.596	812.923
Tmco6	ENSMUSG00000006850	55.4856	22.6272	34.4443	11.6261	38.2937	103.378	91.5306	60.6122	43.3813	20.1892	81.3298	37.4493
Stambp	ENSMUSG00000006906	151.661	25.4556	119.694	39.0304	19.5223	56.3115	38.7562	45.2457	46.1503	50.9538	26.7668	36.5359
Ezh1	ENSMUSG00000006920	1185.54	432.746	896.412	317.226	316.862	565.636	463.425	300.5	413.507	373.02	346.939	400.068
Hap1	ENSMUSG00000006930	0	1.4142	9.47217	0.830434	10.512	0	1.6492	1.70739	11.0761	14.4209	5.14746	0
Leprel4	ENSMUSG00000006931	0	18.3846	54.2497	48.9956	34.5394	58.8329	18.9658	92.1988	106.146	71.143	88.5362	241.137
Ctnnb1	ENSMUSG00000006932	699.118	336.58	1248.6	591.269	577.409	600.936	883.147	617.22	561.188	591.256	683.582	805.616
Eif1b	ENSMUSG00000006941	27.7428	16.9704	9.47217	39.8609	18.7714	9.24517	26.3872	6.82954	7.38405	9.61393	16.4719	10.9608
Klk4	ENSMUSG00000006948	3.69904	0	0	0	0	0	0	0.853693	0	0	0	0
Chrd	ENSMUSG00000006958	1.84952	22.6272	0	0	0.750857	3.36188	2.4738	12.8054	2.76902	8.65253	3.08847	2.74019
Psmd2	ENSMUSG00000006998	160.908	492.142	204.943	231.691	294.336	115.985	271.293	269.767	260.288	282.649	292.376	146.144
Syngr3	ENSMUSG00000007021	0	0	0	0	0	0	0	0	0	0	0	3.65359
Vars	ENSMUSG00000007029	528.962	377.592	253.165	323.869	443.756	279.036	269.644	291.109	234.444	322.067	235.753	210.995
Vwa7	ENSMUSG00000007030	216.394	592.55	898.134	121.243	210.991	211.798	155.849	116.102	128.298	90.3709	75.1529	92.2531
Hspa1l	ENSMUSG00000007033	9.2476	9.89941	24.9721	9.13478	35.2903	42.8639	23.0888	5.12216	8.30706	14.4209	18.5308	0.913397
Slc44a4	ENSMUSG00000007034	0	0	0	0	0	0	0	0	0	0	0	0
Msh5	ENSMUSG00000007035	0	33.9408	0.861106	8.30434	13.5154	2.52141	43.7038	3.41477	0.923007	0.961393	3.08847	5.48038
Abhd16a	ENSMUSG00000007036	24.0437	131.521	186.86	129.548	122.39	113.463	131.111	168.177	130.144	73.0658	78.2413	112.348
Neu1	ENSMUSG00000007038	51.7865	305.467	35.3054	219.235	356.657	103.378	67.6172	247.571	143.989	270.151	272.815	253.924
Ddah2	ENSMUSG00000007039	75.8303	350.722	130.888	32.3869	53.3108	10.0856	9.8952	44.392	25.8442	6.72975	4.11796	10.0474
Clic1	ENSMUSG00000007041	103.573	329.509	12.0555	100.483	213.994	89.0898	12.369	64.8807	109.838	38.4557	46.3271	52.977
Lsm2	ENSMUSG00000007050	12.9466	14.142	92.1384	35.7087	131.4	90.7707	98.952	70.8565	30.4592	46.1468	75.1529	52.977
Pole	ENSMUSG00000007080	105.423	288.497	122.277	63.9434	195.223	151.285	249.854	93.9062	127.375	167.282	138.981	110.521
Atp1a2	ENSMUSG00000007097	2249.02	2975.48	2089.04	1748.89	1650.38	2522.25	3129.36	1992.52	2227.21	2592.88	3088.47	2962.15
Atp1a4	ENSMUSG00000007107	48.0875	96.1657	57.6941	24.913	23.2766	78.1637	64.3188	43.5383	35.0743	45.1854	56.622	39.2761
Casq1	ENSMUSG00000007122	758.303	681.645	304.832	478.33	613.45	732.889	206.975	822.106	850.089	368.213	375.764	269.452
Stx1a	ENSMUSG00000007207	0	91.9231	26.6943	4.98261	21.024	5.88329	4.9476	52.929	38.7663	13.4595	22.6488	5.48038
Ceacam9	ENSMUSG00000007209	0	0	0	0	0	0	0	0.853693	0	0	0	0
Zfp775	ENSMUSG00000007216	181.253	22.6272	24.111	143.665	111.127	94.9731	108.847	167.324	147.681	178.819	122.509	146.144
Scube2	ENSMUSG00000007279	1475.92	531.74	856.801	304.769	403.961	157.168	204.501	217.692	209.523	178.819	151.335	173.545
Mrpl49	ENSMUSG00000007338	1.84952	5.65681	53.3886	39.8609	44.3006	64.7162	118.742	18.7812	9.23007	46.1468	93.6837	41.1029
Dennd2c	ENSMUSG00000007379	9.2476	226.272	35.3054	105.465	147.168	100.856	72.5648	92.1988	143.066	161.514	176.043	140.663
Mark3	ENSMUSG00000007411	532.662	367.692	989.411	883.582	946.08	558.912	577.22	927.964	702.408	734.504	494.156	517.896
Gatad1	ENSMUSG00000007415	253.384	50.9112	102.472	73.9087	72.8331	76.4827	174.815	99.8821	72.9175	64.4133	91.6247	109.608
NA	ENSMUSG00000007440	0	4.2426	0	9.13478	0	0	0	0	0.923007	4.80696	4.11796	0
2310003L06Rik	ENSMUSG00000007457	0	0	0	0	0	0	0	0	0	0	0	2.74019
M6pr	ENSMUSG00000007458	14.7962	22.6272	74.9163	84.7043	34.5394	55.471	197.904	82.8082	54.4574	36.5329	91.6247	94.9933
Lrrc8a	ENSMUSG00000007476	602.943	493.556	459.831	240.826	265.803	523.613	333.138	248.425	264.903	445.125	351.056	413.769
Mc5r	ENSMUSG00000007480	0	0	0	0	0	0	0	0	0	0	0	0
Ppp2r1a	ENSMUSG00000007564	188.651	77.7811	138.638	165.256	237.271	178.18	252.328	122.078	175.371	128.827	175.014	168.065
Fance	ENSMUSG00000007570	236.738	572.752	148.11	98.8217	115.632	134.475	52.7744	121.224	108.915	83.6412	124.568	116.915
Tinf2	ENSMUSG00000007589	11.0971	49.497	15.4999	38.2	70.5805	35.2997	94.829	55.49	73.8405	14.4209	78.2413	45.6699
Tssk4	ENSMUSG00000007591	11.0971	49.497	23.2499	6.64348	0.750857	3.36188	0	3.41477	3.69203	15.3823	10.2949	7.30718
Hapln4	ENSMUSG00000007594	0	0	0	0	1.50171	0	12.369	1.70739	0.923007	2.88418	2.05898	4.56699
Dus3l	ENSMUSG00000007603	750.905	468.101	596.747	603.726	720.072	694.228	586.291	487.459	404.277	386.48	269.727	509.676
Gtpbp3	ENSMUSG00000007610	109.122	60.8107	57.6941	108.787	162.936	119.347	141.007	102.443	117.222	142.286	48.3861	69.4182
Tgfbr1	ENSMUSG00000007613	208.996	140.006	510.636	348.782	394.951	281.557	182.237	322.696	348.897	123.058	184.279	195.467
Homer1	ENSMUSG00000007617	1150.4	521.84	971.328	939.221	943.827	907.707	1311.94	1119.19	996.847	1052.72	930.66	978.248
Rad51c	ENSMUSG00000007646	181.253	183.846	174.805	65.6043	75.0857	190.787	181.412	65.7343	76.6095	93.2551	92.6542	130.616
Gabrb2	ENSMUSG00000007653	0	0	0	0	1.50171	0	0	0	0	0	5.14746	0
Cav1	ENSMUSG00000007655	0	15.5562	26.6943	26.5739	52.56	10.0856	160.797	17.0739	38.7663	22.112	58.681	45.6699
Arpp19	ENSMUSG00000007656	57.3351	29.6982	361.665	112.109	64.5737	193.308	347.157	112.687	120.914	102.869	106.038	181.766
Bcl2l1	ENSMUSG00000007659	715.764	1152.57	790.496	152.8	226.759	358.04	186.36	150.25	120.914	126.904	87.5068	116.915
Khsrp	ENSMUSG00000007670	608.492	299.811	318.609	409.404	440.002	417.713	256.451	382.454	375.664	572.029	490.038	377.233
Dio2	ENSMUSG00000007682	0	0	10.3333	16.6087	3.75428	7.56423	35.4578	10.2443	4.61503	3.84557	9.26542	1.82679
Ccdc124	ENSMUSG00000007721	90.6264	24.0414	11.1944	43.1826	42.048	36.9807	17.3166	41.8309	41.5353	21.1506	35.0027	31.0555
Cct4	ENSMUSG00000007739	0	182.432	23.2499	187.678	108.123	55.471	74.214	157.933	115.376	46.1468	157.512	141.577
0610009B22Rik	ENSMUSG00000007777	0	0	0	95.5	13.5154	23.5331	1.6492	27.3182	16.6141	27.8804	13.3834	21.0081
Cpt1c	ENSMUSG00000007783	16.6457	104.651	30.1387	34.0478	35.2903	20.1713	8.246	64.027	18.4601	2.88418	6.17695	19.1813
Twist2	ENSMUSG00000007805	0	0	0	0	0	2.52141	0	0	0	0	0	0
Zfp655	ENSMUSG00000007812	312.569	203.645	267.804	426.013	284.575	345.433	527.744	420.871	379.356	395.132	707.26	511.502
Rhoa	ENSMUSG00000007815	61.0341	12.7278	27.5554	84.7043	55.5634	100.856	134.41	90.4914	97.8387	56.7222	109.126	70.3316
Zmiz1	ENSMUSG00000007817	8670.55	6864.53	3262.73	1581.98	1711.95	1847.35	1110.74	1297.61	1767.56	1251.73	968.751	1125.31
Ankrd26	ENSMUSG00000007827	92.476	124.45	217.86	234.183	237.271	185.744	76.6878	183.544	202.138	158.63	107.067	174.459
Aldh16a1	ENSMUSG00000007833	7.39808	63.6391	97.305	69.7565	57.816	36.9807	48.6514	76.8323	101.531	119.213	62.799	67.5914
Hnrnpa0	ENSMUSG00000007836	20.3447	33.9408	83.5273	29.8956	42.048	29.4164	5.7722	40.1236	34.1512	31.726	24.7078	15.5278
Prrg2	ENSMUSG00000007837	20.3447	26.8698	3.44443	52.3174	15.0171	21.0117	62.6696	31.5866	36.9203	24.9962	28.8258	22.8349
Hnrnph1	ENSMUSG00000007850	1583.19	1251.57	1297.69	2629.16	2372.71	1269.95	2194.26	2498.76	2077.69	1897.79	1773.81	1835.93
Ift43	ENSMUSG00000007867	99.874	49.497	57.6941	80.5521	72.0823	65.5566	45.353	66.588	43.3813	74.9886	51.4746	34.7091
Id3	ENSMUSG00000007872	0	333.752	47.3609	6.64348	66.8263	15.9689	7.4214	19.6349	9.23007	23.0734	11.3244	10.0474
Tcap	ENSMUSG00000007877	1104.16	668.917	1134.94	569.678	391.947	580.764	517.024	1253.22	1018.08	3382.18	1205.53	1473.31
Arid1a	ENSMUSG00000007880	5136.11	4142.2	2842.51	2205.63	2768.41	1534.7	1331.73	2362.17	2163.53	1879.52	1782.05	1842.32
Crlf1	ENSMUSG00000007888	3.69904	41.0118	1.72221	20.7609	14.2663	1.68094	0.8246	3.41477	11.0761	0	0	1.82679
Ctsd	ENSMUSG00000007891	1285.42	705.686	542.497	810.504	479.047	483.27	992.818	482.336	591.647	549.917	1014.05	792.829
NA	ENSMUSG00000007892	3.69904	70.7101	6.88885	69.7565	45.0514	5.88329	7.4214	25.6108	40.6123	23.0734	80.3003	40.1895
Cabs1	ENSMUSG00000007907	0	0	0	0	0	0	0	0	0	0	0	0
Hmgcll1	ENSMUSG00000007908	1.84952	0	0	0	1.50171	0	0	0.853693	0	0	0	0
Ttc9b	ENSMUSG00000007944	0	0	0	0	6.00685	0	0	0	0	0	3.08847	0.913397
Phox2a	ENSMUSG00000007946	0	0	0	0	9.76114	0	0	0.853693	0	0	0	0
Abhd8	ENSMUSG00000007950	49.937	0	0	14.1174	0.750857	0	18.9658	17.9275	32.3052	62.4905	65.8874	39.2761
Ift22	ENSMUSG00000007987	1.84952	12.7278	9.47217	11.6261	7.50857	9.24517	9.8952	4.26846	11.9991	3.84557	38.0912	4.56699
Fzd3	ENSMUSG00000007989	0	4.2426	8.61106	22.4217	6.00685	8.4047	13.1936	5.12216	11.9991	10.5753	8.23593	3.65359
1700008O03Rik	ENSMUSG00000008028	5.54856	1.4142	12.9166	12.4565	12.7646	5.88329	3.2984	4.26846	3.69203	13.4595	20.5898	28.3153
Mid1ip1	ENSMUSG00000008035	199.748	296.982	244.554	53.9782	69.0788	220.203	145.954	103.297	124.606	149.977	32.9437	80.3789
Ap2s1	ENSMUSG00000008036	0	14.142	6.88885	34.0478	45.8023	16.8094	31.3348	16.2202	26.7672	49.031	38.0912	47.4966
Fgfrl1	ENSMUSG00000008090	16.6457	12.7278	89.5551	6.64348	87.8502	19.3308	59.3712	33.294	37.8433	34.6101	14.4129	29.2287
4930432K21Rik	ENSMUSG00000008129	0	16.9704	0.861106	6.64348	6.75771	26.895	6.5968	0.853693	3.69203	0.961393	4.11796	9.13397
Fhl2	ENSMUSG00000008136	1424.13	1211.97	1723.94	2584.31	1841.1	2207.07	3078.23	4848.97	3461.27	5852.96	3634.1	3469.08
Emc10	ENSMUSG00000008140	79.5293	115.965	274.693	123.735	102.867	136.156	231.713	155.372	163.372	173.051	170.896	221.955
Clstn3	ENSMUSG00000008153	0	0	0.861106	1.66087	0	0	0	0	2.76902	3.84557	3.08847	0.913397
Fbxw9	ENSMUSG00000008167	46.238	33.9408	74.9163	107.126	71.3314	64.7162	99.7766	73.4176	61.8414	65.3747	54.563	59.3708
Spib	ENSMUSG00000008193	710.215	543.053	440.887	272.382	256.042	144.561	104.724	304.768	177.217	550.878	389.148	349.831
Fnbp4	ENSMUSG00000008200	4311.23	6069.75	2103.68	2096.85	2610.73	1726.32	1234.43	2531.2	2695.18	2204.47	1563.8	1690.7
Cers4	ENSMUSG00000008206	4660.79	5248.1	2095.07	3712.87	3948.76	3036.62	1659.1	4272.73	4240.29	3112.99	3771.03	3213.33
Scrn3	ENSMUSG00000008226	49.937	74.9527	26.6943	154.461	109.625	153.806	261.398	148.543	106.146	133.634	171.925	158.018
Phax	ENSMUSG00000008301	7.39808	15.5562	110.222	64.7739	113.379	68.9185	46.1776	142.567	121.837	149.977	143.099	159.844
Tle1	ENSMUSG00000008305	73.9808	144.249	26.6943	105.465	111.127	84.047	96.4782	44.392	95.0697	82.6798	85.4478	116.915
1700109H08Rik	ENSMUSG00000008307	0	5.65681	1.72221	9.96521	7.50857	10.9261	54.4236	16.2202	13.8451	22.112	17.5014	28.3153
Relt	ENSMUSG00000008318	0	41.0118	11.1944	19.9304	41.2971	63.0352	18.9658	17.9275	16.6141	11.5367	25.7373	31.0555
Snrpb2	ENSMUSG00000008333	3.69904	1.4142	20.6666	61.4521	33.0377	43.7044	64.3188	30.7329	20.3061	37.4943	38.0912	66.678
Ubc	ENSMUSG00000008348	232311	214283	65575.8	42891.1	53806.4	33139.7	19302.2	40161.1	41037.8	41306.2	53353.4	49960.1
Prpf31	ENSMUSG00000008373	307.02	52.3254	148.971	90.5173	45.8023	110.942	109.672	91.3451	108.915	74.0272	52.5041	84.0325
Sertad1	ENSMUSG00000008384	36.9904	1.4142	132.61	68.9261	43.5497	11.7666	22.2642	17.0739	61.8414	66.3361	49.4156	39.2761
Carhsp1	ENSMUSG00000008393	46.238	73.5385	464.998	95.5	90.8537	169.775	188.009	81.9545	89.5316	71.143	178.102	124.222
Elk3	ENSMUSG00000008398	55.4856	110.308	177.388	172.73	157.68	184.903	82.46	120.371	201.215	59.6063	214.134	104.127
Herpud2	ENSMUSG00000008429	199.748	243.243	253.165	414.387	288.329	256.343	279.539	298.792	323.052	149.016	278.992	280.413
Rdh13	ENSMUSG00000008435	31.4418	97.5799	276.415	399.439	302.595	484.11	573.097	384.162	425.506	408.592	415.914	467.659
Adam21	ENSMUSG00000008438	0	4.2426	20.6666	4.98261	7.50857	4.20235	4.123	9.39062	12.9221	6.72975	13.3834	19.1813
NA	ENSMUSG00000008450	99.874	31.1124	117.11	94.6695	93.1062	52.9496	114.619	82.8082	59.0724	82.6798	89.5657	135.183
Fut1	ENSMUSG00000008461	14.7962	5.65681	3.44443	4.15217	0	0	0	5.97585	0	14.4209	1.02949	0.913397
Arpc5	ENSMUSG00000008475	1181.84	397.391	142.083	117.091	233.516	94.1326	132.761	87.0767	146.758	76.9114	74.1234	101.387
Rnf151	ENSMUSG00000008482	20.3447	0	4.30553	0	0	0	0	4.26846	0.923007	0	2.05898	0
Elavl2	ENSMUSG00000008489	0	2.8284	0.861106	0	0.750857	1.68094	1.6492	0.853693	0.923007	2.88418	1.02949	0.913397
Pou2f2	ENSMUSG00000008496	70.2817	145.663	24.9721	34.0478	63.072	34.4593	9.8952	40.1236	35.0743	48.0696	28.8258	52.977
Mgst1	ENSMUSG00000008540	0	4.2426	0	8.30434	6.00685	0.84047	24.738	5.97585	25.8442	3.84557	2.05898	1.82679
Nfib	ENSMUSG00000008575	2985.12	3467.62	3021.62	2404.11	2535.64	2547.46	2532.35	2847.92	2898.24	2026.62	1844.85	1747.33
Htr3b	ENSMUSG00000008590	7.39808	1.4142	4.30553	4.15217	3.75428	1.68094	2.4738	0.853693	0	2.88418	2.05898	4.56699
Rab25	ENSMUSG00000008601	0	1.4142	0	0	0.750857	0	0	0	0	0	2.05898	0.913397
Ubqln4	ENSMUSG00000008604	1278.02	1769.17	884.356	673.482	670.515	630.352	672.049	710.272	691.332	819.106	412.826	523.377
Rbfox1	ENSMUSG00000008658	234.889	165.462	185.138	240.826	316.111	170.615	800.687	374.771	236.29	1231.54	1039.79	969.114
Rps18	ENSMUSG00000008668	27.7428	39.5976	122.277	142.004	173.448	134.475	56.8974	152.811	128.298	124.02	107.067	137.923
NA	ENSMUSG00000008682	9.2476	19.7988	82.6662	225.878	122.39	190.787	361.999	230.497	261.211	221.12	268.697	209.168
NA	ENSMUSG00000008683	42.5389	195.16	143.805	132.039	95.3588	256.343	470.022	127.2	160.603	267.267	210.016	212.822
Ncaph2	ENSMUSG00000008690	110.971	65.0533	109.361	42.3522	50.3074	89.9302	178.938	67.4417	71.0715	74.9886	125.598	57.544
Hipk1	ENSMUSG00000008730	532.662	823.065	850.773	478.33	628.467	546.305	768.527	560.022	601.8	325.912	423.121	390.021
Gprc5b	ENSMUSG00000008734	0	0	52.5275	2.4913	18.0206	9.24517	20.615	3.41477	11.9991	7.69114	0	1.82679
Man1a2	ENSMUSG00000008763	958.051	960.243	925.689	1332.02	1506.97	865.684	915.306	1426.52	1520.19	982.543	835.947	1004.74
Ceacam5	ENSMUSG00000008789	0	0	0	0	0	0	0	0	0	0	0	0
Tppp2	ENSMUSG00000008813	0	0	0	0	0	0	0	0	0	0	0	0
Acyp1	ENSMUSG00000008822	144.262	9.89941	18.9443	8.30434	12.0137	52.9496	12.369	15.3665	20.3061	24.9962	10.2949	53.8904
Cldn13	ENSMUSG00000008843	0	0	0	0	0	0	0	0	0	0	0	0
Cd163	ENSMUSG00000008845	7.39808	0	0	11.6261	0.750857	23.5331	5.7722	8.53693	8.30706	5.76836	2.05898	4.56699
Hdac5	ENSMUSG00000008855	14437.3	14593.1	3582.2	932.578	2153.46	2662.61	912.008	968.088	1398.36	1010.42	1073.76	1257.75
Rala	ENSMUSG00000008859	59.1846	2.8284	4.30553	89.6869	75.8365	90.7707	75.8632	98.1747	51.6884	26.919	64.8579	58.4574
Clec3a	ENSMUSG00000008874	0	0	0	0	0	0	0	0	0	0	0	0
Vdac3	ENSMUSG00000008892	3.69904	21.213	12.0555	101.313	62.3211	55.471	271.293	128.054	71.9945	96.1393	194.574	120.568
Slc1a7	ENSMUSG00000008932	0	7.07101	4.30553	2.4913	7.50857	9.24517	12.369	4.26846	9.23007	4.80696	36.0322	4.56699
Vps72	ENSMUSG00000008958	51.7865	188.089	72.3329	196.813	308.602	194.989	232.537	186.105	193.831	203.815	274.874	186.333
Gabpa	ENSMUSG00000008976	429.088	246.071	563.164	719.156	608.945	716.08	983.748	758.079	622.106	626.828	841.094	886.909
Bmp7	ENSMUSG00000008999	53.6361	31.1124	77.4996	11.6261	21.7748	19.3308	26.3872	39.2699	16.6141	58.6449	19.5603	38.3627
Dynll1	ENSMUSG00000009013	90.6264	132.935	186.86	237.504	295.087	176.499	239.959	285.133	225.214	282.649	212.075	279.5
Pdcl	ENSMUSG00000009030	31.4418	195.16	122.277	88.8565	57.0651	71.4399	67.6172	71.7102	106.146	79.7956	56.622	131.529
Tmem184b	ENSMUSG00000009035	660.278	644.876	1071.22	198.474	370.923	497.558	205.325	283.426	386.74	258.615	248.107	232.916
NA	ENSMUSG00000009047	0	0	0	0	0	0	0	0	0	0	0	0
Rtdr1	ENSMUSG00000009070	0	0	0.861106	0	0.750857	0	0	0	1.84601	0	0	0
Nf2	ENSMUSG00000009073	1078.27	588.308	877.468	429.335	791.403	632.033	1106.61	645.392	650.72	784.496	682.553	673.174
Cabp7	ENSMUSG00000009075	0	9.89941	0	0	5.256	9.24517	2.4738	11.9517	9.23007	0.961393	1.02949	6.39378
Zmat5	ENSMUSG00000009076	0	4.2426	20.6666	4.98261	6.00685	11.7666	11.5444	6.82954	3.69203	1.92279	1.02949	0
Ewsr1	ENSMUSG00000009079	1842.12	1781.89	1599.07	2466.39	2010.04	2044.86	2637.07	2654.98	2205.99	1964.12	1941.62	1816.75
Ap1b1	ENSMUSG00000009090	521.564	1200.66	508.053	583.795	644.986	895.1	636.591	711.98	716.253	1087.33	727.85	684.134
Derl3	ENSMUSG00000009092	22.1942	15.5562	0	40.6913	11.2629	39.5021	4.123	4.26846	9.23007	61.5291	8.23593	10.9608
Gstt4	ENSMUSG00000009093	0	0	0	0	0	0	0	0	0	0	0	0
Tbx1	ENSMUSG00000009097	3.69904	4.2426	12.0555	13.287	6.75771	11.7666	18.1412	8.53693	4.61503	21.1506	24.7078	10.9608
Gnat2	ENSMUSG00000009108	3.69904	0	5.16664	0	3.00343	10.9261	10.7198	0	2.76902	2.88418	13.3834	8.22057
Bcl2l13	ENSMUSG00000009112	75.8303	270.112	93.8606	142.835	166.69	248.779	196.255	161.348	118.145	190.356	153.394	191.813
2610028H24Rik	ENSMUSG00000009114	9.2476	43.8402	0	7.47391	3.75428	6.72376	0	3.41477	0	9.61393	1.02949	1.82679
Spatc1l	ENSMUSG00000009115	0	0	5.16664	0	0	0	0	0	0	0	0	0
Dqx1	ENSMUSG00000009145	5.54856	4.2426	7.74996	8.30434	14.2663	5.04282	29.6856	26.4645	18.4601	40.3785	28.8258	50.2368
Ccl8	ENSMUSG00000009185	0	0	0.861106	1.66087	0	0	0	0	0	0	0	0
Lnp	ENSMUSG00000009207	270.03	287.083	241.11	456.739	337.886	397.542	662.978	246.717	310.13	199.008	318.113	318.776
2310007L24Rik	ENSMUSG00000009210	16.6457	66.4675	109.361	62.2826	133.653	44.5449	102.25	82.8082	50.7654	62.4905	53.5335	105.041
Tmem8c	ENSMUSG00000009214	0	0	0	0	0	0	0	0	0	0	0	0
Fam163b	ENSMUSG00000009216	834.133	452.544	58.5552	73.9087	71.3314	38.6616	2.4738	32.4403	27.6902	18.2665	23.6783	16.4411
Trpm5	ENSMUSG00000009246	0	0	0.861106	0.830434	0	0.84047	0	0	7.38405	18.2665	0	2.74019
Ascl2	ENSMUSG00000009248	0	0	0	0.830434	0	0.84047	0	0.853693	0	0	0	0
Rarres2	ENSMUSG00000009281	0	0	5.16664	0	0	0	11.5444	5.97585	3.69203	0	8.23593	0.913397
Pttg1ip	ENSMUSG00000009291	147.962	115.965	567.469	113.77	118.635	160.53	255.626	138.298	64.6105	124.02	199.721	181.766
Trpm2	ENSMUSG00000009292	90.6264	53.7396	16.361	11.6261	6.75771	24.3736	7.4214	4.26846	4.61503	20.1892	6.17695	10.9608
Ube2g2	ENSMUSG00000009293	77.6798	19.7988	123.138	81.3826	110.376	52.1091	89.0568	89.6377	59.0724	38.4557	90.5952	32.8823
Mpo	ENSMUSG00000009350	0	1.4142	1.72221	3.32174	0.750857	0.84047	10.7198	5.97585	0.923007	1.92279	4.11796	1.82679
Lpo	ENSMUSG00000009356	0	0	0	0	0	0.84047	0	0.853693	0	0	0	0
Met	ENSMUSG00000009376	107.272	32.5266	391.803	275.704	298.841	289.122	96.4782	270.621	350.743	51.9152	110.156	105.954
Slc16a12	ENSMUSG00000009378	0	4.2426	3.44443	4.15217	1.50171	29.4164	23.9134	15.3665	4.61503	11.5367	10.2949	20.0947
Syn2	ENSMUSG00000009394	127.617	28.284	12.9166	12.4565	9.76114	82.366	15.6674	30.7329	22.1522	33.6487	3.08847	15.5278
Elk1	ENSMUSG00000009406	179.403	185.26	253.165	292.313	236.52	340.39	378.491	359.405	359.973	462.43	719.614	626.59
Nav1	ENSMUSG00000009418	1281.72	2169.38	690.607	414.387	524.849	421.075	276.241	434.53	578.725	413.399	369.587	284.98
Tnpo1	ENSMUSG00000009470	136.864	291.325	255.749	362.069	534.61	285.76	413.949	361.966	463.349	257.653	310.906	312.382
Myod1	ENSMUSG00000009471	0	0	0	0	0	0	0	0	0	0	0	0
Otog	ENSMUSG00000009487	1.84952	106.065	192.027	9.96521	24.7783	19.3308	32.984	12.8054	28.6132	0	4.11796	21.0081
Rnmt	ENSMUSG00000009535	73.9808	73.5385	203.221	154.461	217.748	232.81	231.713	239.034	203.061	283.611	243.989	158.018
Kcnq1	ENSMUSG00000009545	1009.84	489.314	670.802	417.709	304.097	753.901	479.093	378.186	502.116	498.963	248.107	344.351
Srp14	ENSMUSG00000009549	159.059	135.763	8.61106	20.7609	52.56	7.56423	44.5284	23.9034	27.6902	20.1892	8.23593	18.2679
6330409D20Rik	ENSMUSG00000009551	0	1.4142	0	10.7956	15.768	6.72376	0.8246	0.853693	5.53804	0	1.02949	0
Cdk9	ENSMUSG00000009555	397.647	502.041	293.637	244.148	317.612	193.308	216.045	209.155	174.448	209.584	231.636	205.514
Tor2a	ENSMUSG00000009563	44.3885	94.7515	110.222	105.465	111.878	52.9496	84.1092	122.932	160.603	122.097	76.1823	110.521
Fpgs	ENSMUSG00000009566	604.793	1384.5	459.831	95.5	174.95	213.479	122.865	97.321	157.834	140.363	83.3888	80.3789
Mkl2	ENSMUSG00000009569	4305.68	4017.75	3374.68	2208.96	2715.85	2181.02	1293.8	2363.02	2943.47	2063.15	2253.56	1872.46
Cbx5	ENSMUSG00000009575	88.7769	219.201	131.749	397.778	304.097	648.843	843.566	323.55	356.281	251.885	455.035	403.722
Odam	ENSMUSG00000009580	0	0	0	0	0	0	0	0	0	0	0	0
Apobec3	ENSMUSG00000009585	7.39808	110.308	11.1944	42.3522	30.0343	21.0117	4.123	18.7812	35.0743	6.72975	28.8258	21.0081
St6galnac1	ENSMUSG00000009588	7.39808	14.142	1.72221	12.4565	3.75428	1.68094	5.7722	8.53693	1.84601	5.76836	3.08847	4.56699
Taf7l	ENSMUSG00000009596	0	0	0	0	0	0	0	0	0	0	0	0
Sardh	ENSMUSG00000009614	22.1942	2.8284	14.6388	9.96521	10.512	15.9689	11.5444	6.82954	6.46105	6.72975	25.7373	9.13397
Vav2	ENSMUSG00000009621	135.015	783.468	358.22	194.322	247.032	305.931	88.2322	247.571	281.517	367.252	215.164	179.939
Tex15	ENSMUSG00000009628	0	0	0	1.66087	0	0.84047	0	0.853693	0.923007	0.961393	0	2.74019
Ppp2cb	ENSMUSG00000009630	0	35.355	57.6941	32.3869	21.024	11.7666	30.5102	23.0497	30.4592	6.72975	41.1796	56.6306
G0s2	ENSMUSG00000009633	321.816	28.284	12.9166	26.5739	57.816	44.5449	94.0044	93.9062	100.608	134.595	118.391	148.884
Dmap1	ENSMUSG00000009640	35.1409	113.136	174.805	126.226	184.711	103.378	155.025	140.006	130.144	129.788	97.8017	95.9067
Pla2g12b	ENSMUSG00000009646	1.84952	0	0	0	0	0	0	0	0	0	0	0
Mcu	ENSMUSG00000009647	92.476	32.5266	81.8051	110.448	108.123	147.082	275.416	85.3693	167.064	85.5639	122.509	91.3397
Oit3	ENSMUSG00000009654	0	0	0	0	0	0	0	0	0.923007	0	0	0.913397
Tex11	ENSMUSG00000009670	0	0	0.861106	0	0	0	18.1412	0	0	0	3.08847	1.82679
Bcr	ENSMUSG00000009681	146.112	446.888	10.3333	127.056	86.3485	93.2921	116.269	63.1733	129.221	64.4133	131.775	71.245
Fxyd5	ENSMUSG00000009687	122.068	130.107	17.2221	45.6739	38.2937	40.3425	19.7904	62.3196	55.3804	17.3051	28.8258	12.7876
Kcnd1	ENSMUSG00000009731	1.84952	80.6095	9.47217	18.2696	52.56	19.3308	33.8086	23.0497	36.9203	36.5329	41.1796	43.8431
Tfcp2	ENSMUSG00000009733	295.923	316.781	295.36	279.026	150.922	163.051	131.111	173.3	143.989	169.205	168.837	150.711
Pou6f2	ENSMUSG00000009734	0	2.8284	38.7498	7.47391	0.750857	5.88329	0.8246	4.26846	11.0761	1.92279	3.08847	0.913397
Pou6f1	ENSMUSG00000009739	797.143	664.675	232.499	126.226	299.592	200.872	160.797	193.788	229.829	139.402	96.7722	105.954
Ubp1	ENSMUSG00000009741	2391.43	2293.83	1432.88	889.395	948.332	1027.89	831.197	813.569	726.406	681.627	460.183	525.203
Nuak2	ENSMUSG00000009772	3.69904	2.8284	36.1665	29.8956	35.2903	43.7044	18.1412	59.7585	31.3822	14.4209	10.2949	60.2842
Ick	ENSMUSG00000009828	1078.27	1313.79	580.386	440.13	506.828	456.375	503.006	454.165	526.114	640.287	612.547	662.213
Sdhb	ENSMUSG00000009863	656.579	543.053	483.942	586.287	410.719	562.274	865.83	749.542	555.65	976.775	687.7	768.167
Cox4i2	ENSMUSG00000009876	0	0	0	0	14.2663	2.52141	0	0.853693	0.923007	0	2.05898	10.0474
Snap47	ENSMUSG00000009894	449.433	195.16	234.221	261.587	185.462	223.565	267.17	165.616	177.217	267.267	202.81	111.434
Wnt3a	ENSMUSG00000009900	0	0	0.861106	1.66087	2.25257	0	2.4738	0	0	0	1.02949	0
Kdsr	ENSMUSG00000009905	379.151	336.58	422.803	396.948	400.958	320.219	344.683	309.037	435.659	247.078	477.684	551.692
Vps4b	ENSMUSG00000009907	77.6798	203.645	167.055	366.222	258.295	225.246	454.355	292.817	244.597	228.811	243.989	246.617
NA	ENSMUSG00000009927	1.84952	7.07101	18.0832	18.2696	24.0274	50.4282	43.7038	40.1236	28.6132	43.2627	98.8312	81.2923
Nxf2	ENSMUSG00000009941	0	0	0	0	0	0	0	0	0	0	0	0
Taz	ENSMUSG00000009995	795.293	999.84	911.051	623.656	621.709	850.555	1147.84	764.909	648.874	944.087	850.36	895.129
Kif19a	ENSMUSG00000010021	0	0	0	0	0	0	0	9.39062	2.76902	0	0	1.82679
Aldh3a2	ENSMUSG00000010025	220.093	42.426	56.833	105.465	187.714	71.4399	108.023	103.297	90.4546	91.3323	35.0027	53.8904
Zmynd10	ENSMUSG00000010044	0	0	0	3.32174	4.50514	0	0.8246	0.853693	10.1531	49.031	40.1502	11.8742
Tmem115	ENSMUSG00000010045	144.262	16.9704	61.1386	12.4565	36.792	128.592	45.353	40.9773	29.5362	11.5367	16.4719	19.1813
Hyal2	ENSMUSG00000010047	73.9808	45.2544	27.5554	63.113	48.0548	26.895	48.6514	69.1491	50.7654	52.8766	37.0617	48.41
Ifrd2	ENSMUSG00000010048	608.492	214.959	157.582	151.139	355.906	278.195	285.312	176.714	148.604	241.31	196.633	170.805
Hyal1	ENSMUSG00000010051	101.724	26.8698	222.165	193.491	129.898	210.958	103.9	141.713	107.069	146.132	106.038	142.49
Tusc2	ENSMUSG00000010054	5.54856	29.6982	0.861106	24.913	19.5223	8.4047	4.123	32.4403	20.3061	47.1082	22.6488	25.5751
Nprl2	ENSMUSG00000010057	61.0341	21.213	27.5554	90.5173	145.666	51.2686	181.412	67.4417	56.3034	100.946	89.5657	63.0244
Slc38a3	ENSMUSG00000010064	401.346	418.604	384.915	689.261	491.811	983.349	1839.68	1388.1	920.238	2267.93	1614.24	1646.85
Cacna2d2	ENSMUSG00000010066	42.5389	11.3136	18.9443	10.7956	15.0171	6.72376	5.7722	64.027	8.30706	49.9924	18.5308	3.65359
Rassf1	ENSMUSG00000010067	122.068	224.858	230.777	141.174	153.175	79.8446	69.2664	87.9304	119.068	145.17	149.276	64.8512
Epn3	ENSMUSG00000010080	1712.65	1617.85	1287.35	954.169	777.137	945.528	644.013	1024.43	1144.53	988.312	556.955	771.821
Rnf112	ENSMUSG00000010086	0	0	0	0.830434	0	0	0	0	0.923007	0	2.05898	0
Slc3a2	ENSMUSG00000010095	253.384	181.018	162.749	148.648	156.929	136.156	169.868	171.592	143.066	92.2937	119.421	107.781
Nxf1	ENSMUSG00000010097	950.653	1371.78	2213.04	2026.26	1879.39	1765.83	2313	1971.18	1820.17	1770.89	1410.4	1512.59
Stx5a	ENSMUSG00000010110	362.506	169.704	478.775	470.856	535.361	419.394	653.908	527.582	484.578	529.727	439.593	420.163
Slc47a1	ENSMUSG00000010122	136.864	127.278	185.138	515.7	343.892	331.145	574.746	538.68	359.973	348.024	413.855	341.611
Pifo	ENSMUSG00000010136	0	0	0	0	0	0	0	0	0	0	0	0
Tnfrsf13b	ENSMUSG00000010142	16.6457	7.07101	8.61106	11.6261	9.01028	19.3308	9.8952	3.41477	4.61503	5.76836	8.23593	6.39378
Spire2	ENSMUSG00000010154	0	0	2.58332	2.4913	10.512	0	0.8246	0	2.76902	0	0	0
Prox1	ENSMUSG00000010175	7853.06	7355.26	5660.91	1725.64	2718.85	3678.74	3494.65	2060.81	3069.92	3907.1	3366.44	3356.73
Raver1	ENSMUSG00000010205	1958.64	1989.78	1651.6	969.947	959.595	666.492	1089.3	824.667	911.931	847.948	956.397	793.742
2610507B11Rik	ENSMUSG00000010277	4030.1	3184.78	2718.51	2143.35	2627.25	2618.9	2898.47	2648.15	2905.62	2840.91	2415.19	2335.56
AI597479	ENSMUSG00000010290	51.7865	91.9231	47.3609	85.5347	74.3348	59.6733	154.2	47.8068	52.6114	85.5639	63.8285	50.2368
Tmem86a	ENSMUSG00000010307	0	2.8284	3.44443	14.1174	9.01028	5.88329	85.7584	9.39062	7.38405	24.9962	50.4451	95.9067
Optc	ENSMUSG00000010311	42.5389	14.142	6.02775	1.66087	0.750857	5.04282	0	1.70739	0	2.88418	2.05898	3.65359
Tex14	ENSMUSG00000010342	0	2.8284	2.58332	0.830434	5.256	9.24517	5.7722	5.12216	9.23007	13.4595	1.02949	0.913397
Ifi35	ENSMUSG00000010358	20.3447	36.7692	51.6664	78.0608	86.3485	48.7472	107.198	41.8309	47.9963	62.4905	19.5603	63.9378
Rdm1	ENSMUSG00000010362	11.0971	16.9704	30.1387	41.5217	21.024	48.7472	31.3348	39.2699	26.7672	23.0734	21.6193	44.7565
Nedd8	ENSMUSG00000010376	0	7.07101	3.44443	8.30434	0	5.04282	10.7198	13.6591	7.38405	5.76836	5.14746	13.701
Gosr1	ENSMUSG00000010392	175.704	274.355	317.748	269.891	267.305	194.148	187.184	201.471	280.594	217.275	247.078	183.593
Mrpl52	ENSMUSG00000010406	120.219	72.1243	5.16664	34.0478	30.0343	6.72376	4.9476	29.8792	34.1512	32.6873	26.7668	31.9689
Spaca7	ENSMUSG00000010435	0	0	0	0	0	0	0.8246	0	0	0	0	0.913397
Kansl3	ENSMUSG00000010453	2700.3	3425.2	2516.15	1204.13	1230.65	1888.54	2208.28	1315.54	1205.45	1565.15	1380.55	1011.13
Eya4	ENSMUSG00000010461	0	8.48521	0	21.5913	8.25943	0	1.6492	18.7812	7.38405	0	1.02949	5.48038
Ebf3	ENSMUSG00000010476	327.365	111.722	80.0829	59.7913	54.0617	76.4827	39.5808	42.6846	47.0733	76.9114	56.622	47.4966
Uckl1os	ENSMUSG00000010492	79.5293	2.8284	32.722	40.6913	16.5189	71.4399	141.007	47.8068	38.7663	76.9114	56.622	61.1976
Myt1	ENSMUSG00000010505	40.6894	66.4675	9.47217	4.98261	6.75771	5.88329	7.4214	6.82954	2.76902	1.92279	7.20644	9.13397
Faf1	ENSMUSG00000010517	264.481	199.402	383.192	531.478	481.299	363.923	498.883	598.439	497.501	432.627	405.62	510.589
Gm266	ENSMUSG00000010529	0	0	0	0	0	0	0	0	0	0	0	0
Tsacc	ENSMUSG00000010538	11.0971	0	88.694	134.53	141.912	27.7355	25.5626	40.9773	66.4565	141.325	64.8579	72.1584
Mettl16	ENSMUSG00000010554	31.4418	41.0118	189.443	258.265	136.656	244.577	517.849	162.202	225.214	239.387	229.577	273.106
Dazl	ENSMUSG00000010592	1.84952	7.07101	5.16664	0.830434	1.50171	1.68094	2.4738	1.70739	0.923007	3.84557	0	0.913397
Apol7a	ENSMUSG00000010601	0	9.89941	0	4.15217	7.50857	0.84047	2.4738	0.853693	8.30706	4.80696	1.02949	0.913397
Pigyl	ENSMUSG00000010607	3.69904	21.213	9.47217	8.30434	8.25943	14.288	13.1936	29.8792	18.4601	7.69114	5.14746	18.2679
Rbm25	ENSMUSG00000010608	216747	158067	13588.3	18723	29698.6	10881.6	5379.69	18863.2	23033.6	17027.2	9976.8	11431.2
Psen2	ENSMUSG00000010609	12.9466	9.89941	3.44443	22.4217	132.902	65.5566	34.6332	18.7812	45.2273	43.2627	55.5925	86.7727
Acaa1b	ENSMUSG00000010651	11.0971	1.4142	46.4998	42.3522	27.0308	24.3736	20.615	14.5128	61.8414	26.919	22.6488	9.13397
Plcd1	ENSMUSG00000010660	939.556	1796.04	723.329	464.213	625.464	641.278	318.296	472.092	697.793	678.743	335.614	337.044
Fads1	ENSMUSG00000010663	38.8399	24.0414	21.5277	9.96521	6.75771	30.2569	29.6856	24.7571	10.1531	27.8804	5.14746	29.2287
Lmbr1	ENSMUSG00000010721	0	29.6982	30.9998	86.3652	85.5977	50.4282	142.656	70.8565	38.7663	136.518	80.3003	86.7727
Tnfrsf22	ENSMUSG00000010751	86.9274	65.0533	12.9166	42.3522	33.0377	34.4593	14.0182	32.4403	40.6123	16.3437	13.3834	8.22057
Cars	ENSMUSG00000010755	1131.91	685.888	167.916	274.874	321.367	169.775	93.1798	376.479	358.127	228.811	293.405	282.24
Phlda2	ENSMUSG00000010760	0	0	0	0	0	0	0	0	0	0	0	0
Asz1	ENSMUSG00000010796	0	0	0	0	0	1.68094	0	0	0	0	0	0
Wnt2	ENSMUSG00000010797	3.69904	1.4142	1.72221	0	0.750857	0	1.6492	0	1.84601	0.961393	5.14746	0
Gabra1	ENSMUSG00000010803	0	0	0	0	0	0	0	0	0	1.92279	0	0
Grid2ip	ENSMUSG00000010825	5.54856	1.4142	1.72221	0.830434	14.2663	0.84047	0.8246	0	0.923007	0	0	0.913397
Kdelr3	ENSMUSG00000010830	5.54856	0	37.8887	38.2	22.5257	26.895	27.2118	35.8551	38.7663	28.8418	25.7373	25.5751
1700006E09Rik	ENSMUSG00000010841	0	1.4142	12.0555	4.98261	2.25257	0	7.4214	2.56108	5.53804	2.88418	0	5.48038
Apip	ENSMUSG00000010911	0	11.3136	23.2499	29.8956	35.2903	24.3736	96.4782	64.8807	66.4565	37.4943	64.8579	100.474
Pdhx	ENSMUSG00000010914	517.865	213.544	188.582	205.117	175.7	182.382	340.56	260.376	128.298	166.321	137.952	151.624
Vac14	ENSMUSG00000010936	1566.54	852.763	1418.24	560.543	699.048	537.06	335.612	571.12	443.966	528.766	441.652	411.942
Mcoln2	ENSMUSG00000011008	0	4.2426	0	4.98261	0.750857	0	0	1.70739	8.30706	0	0	0
Slc5a1	ENSMUSG00000011034	0	0	0	1.66087	3.75428	5.88329	0	0.853693	0	0.961393	2.05898	0
NA	ENSMUSG00000011052	0	0	0	0	0	0	0	0	0	0	0	0
Akt1s1	ENSMUSG00000011096	242.287	213.544	95.5828	48.1652	132.151	103.378	98.952	99.8821	110.761	75.95	98.8312	125.135
Tbrg1	ENSMUSG00000011114	9.2476	29.6982	68.0274	57.3	21.024	53.7901	55.2482	32.4403	18.4601	69.2203	44.2681	19.1813
Panx3	ENSMUSG00000011118	0	0	0	0	0	0	0	0	0	0	0	0
Adssl1	ENSMUSG00000011148	1109.71	1588.15	1131.49	511.548	533.108	432.001	324.068	338.062	383.971	437.434	367.528	435.69
1700026D08Rik	ENSMUSG00000011154	0	2.8284	2.58332	0	0	0	0	0.853693	0.923007	0	0	1.82679
Brf1	ENSMUSG00000011158	340.312	400.219	318.609	235.013	337.135	403.425	159.972	344.892	359.973	315.337	284.14	247.531
Vipr2	ENSMUSG00000011171	0	12.7278	13.7777	1.66087	1.50171	0	0	2.56108	5.53804	0.961393	18.5308	3.65359
Odc1	ENSMUSG00000011179	44.3885	154.148	154.999	223.387	173.448	110.942	230.063	175.861	165.218	166.321	216.193	214.648
Thg1l	ENSMUSG00000011254	18.4952	5.65681	2.58332	34.8782	54.0617	18.4903	10.7198	21.3423	14.7681	20.1892	39.1207	22.8349
Adam19	ENSMUSG00000011256	2851.96	2657.28	1556.88	2840.92	2720.35	1309.45	3200.27	2708.77	1865.4	1410.36	2741.54	2716.44
Pabpc4	ENSMUSG00000011257	1790.33	960.243	1052.27	1290.5	1461.92	1193.47	1109.09	1056.02	1228.52	951.779	891.539	885.995
Exoc3l2	ENSMUSG00000011263	0	0	0	0	0	0.84047	0	4.26846	0	0	7.20644	0.913397
Zfp296	ENSMUSG00000011267	57.3351	9.89941	1.72221	3.32174	2.25257	5.88329	2.4738	10.2443	8.30706	13.4595	12.3539	6.39378
Plin5	ENSMUSG00000011305	190.5	96.1657	220.443	129.548	153.175	168.934	164.095	284.28	236.29	478.773	374.735	414.682
Sugp1	ENSMUSG00000011306	1039.43	524.669	359.943	361.239	235.018	231.129	123.69	187.812	284.286	337.449	162.66	167.152
Dmrtc2	ENSMUSG00000011349	0	0	0	0	0	0	0	0	0	0	0	0
Gm5893	ENSMUSG00000011350	0	1.4142	0	0	0	0	0	0.853693	0	0	0	0
Dhdh	ENSMUSG00000011382	138.714	98.9941	34.4443	73.9087	90.1028	121.028	204.501	102.443	86.7626	140.363	136.922	172.632
Zfp790	ENSMUSG00000011427	164.607	478	465.859	229.2	367.169	315.176	306.751	213.423	230.752	252.846	322.231	300.508
Cpb1	ENSMUSG00000011463	20.3447	0	0	0	0	0.84047	1.6492	0	0	0	0	0
Slc25a41	ENSMUSG00000011486	0	31.1124	0	6.64348	0.750857	4.20235	0	5.97585	6.46105	1.92279	0	3.65359
Fsd1	ENSMUSG00000011589	0	0	17.2221	5.81304	3.00343	4.20235	1.6492	5.97585	6.46105	21.1506	25.7373	10.9608
Pinlyp	ENSMUSG00000011632	0	1.4142	0	0	0	0	0	0	0	0	1.02949	0
Fuz	ENSMUSG00000011658	125.767	52.3254	199.777	53.9782	54.8125	135.316	210.273	96.4673	110.761	150.939	175.014	146.144
Sptbn4	ENSMUSG00000011751	249.685	175.361	274.693	88.8565	21.024	33.6188	24.738	39.2699	27.6902	116.328	143.099	137.01
Pgam1	ENSMUSG00000011752	528.962	166.876	307.415	339.648	271.059	263.907	476.619	338.916	222.445	174.973	134.863	211.908
Evi5	ENSMUSG00000011831	1858.77	1006.91	1735.13	1297.97	1123.28	1129.59	1259.99	1406.03	1141.76	826.798	1062.43	1078.72
Evi5l	ENSMUSG00000011832	780.497	663.26	556.275	241.656	279.319	299.207	149.253	271.474	258.442	236.503	169.866	214.648
Snapc2	ENSMUSG00000011837	0	45.2544	16.361	29.8956	12.0137	35.2997	25.5626	18.7812	30.4592	15.3823	18.5308	26.4885
Git1	ENSMUSG00000011877	1359.4	2060.49	1140.97	451.756	504.576	650.523	407.352	531.851	461.503	448.009	272.815	279.5
Gltp	ENSMUSG00000011884	5.54856	5.65681	0	23.2522	25.5291	13.4475	4.123	27.3182	13.8451	1.92279	3.08847	0
Bnip2	ENSMUSG00000011958	351.409	312.538	173.944	300.617	394.2	273.153	396.633	388.43	371.972	168.244	306.788	282.24
Ccnt1	ENSMUSG00000011960	830.434	1486.33	756.913	1193.33	1400.35	684.142	747.088	1059.43	940.544	1284.42	1289.95	1138.09
Scarf2	ENSMUSG00000012017	35.1409	108.893	7.74996	26.5739	28.5326	35.2997	13.1936	32.4403	37.8433	24.9962	10.2949	11.8742
4930579F01Rik	ENSMUSG00000012042	0	0	0	0.830434	0	0	0.8246	0	0	2.88418	1.02949	0
Brms1l	ENSMUSG00000012076	1303.91	847.107	407.303	298.956	308.602	363.083	293.558	231.351	249.212	354.754	236.783	170.805
Med15	ENSMUSG00000012114	14161.8	8117.52	2284.52	1233.2	1883.15	1262.39	560.728	1178.95	1333.74	1032.54	735.057	758.12
Dhdds	ENSMUSG00000012117	728.711	873.976	467.581	486.635	300.343	563.955	501.357	433.676	442.12	454.739	359.292	409.202
Aim1l	ENSMUSG00000012123	51.7865	38.1834	13.7777	20.7609	26.28	21.0117	9.0706	20.4886	14.7681	18.2665	19.5603	25.5751
Ubxn11	ENSMUSG00000012126	18.4952	16.9704	23.2499	10.7956	5.256	43.7044	133.585	28.1719	35.0743	54.7994	74.1234	67.5914
Mogat1	ENSMUSG00000012187	0	0	0	0.830434	0	0	0	0	0	0	0	0
Tex22	ENSMUSG00000012211	0	0	0	4.15217	2.25257	5.88329	0	0	0	0	17.5014	8.22057
Wnt8a	ENSMUSG00000012282	0	1.4142	0	0	0	0	0	0	0	0	0	0
Tjap1	ENSMUSG00000012296	5160.16	4447.66	2848.54	587.948	1184.85	1364.08	1027.45	778.568	837.167	713.353	552.837	658.559
Ehf	ENSMUSG00000012350	5.54856	4.2426	0	0.830434	3.75428	1.68094	0.8246	1.70739	2.76902	6.72975	3.08847	10.0474
Nanog	ENSMUSG00000012396	1.84952	5.65681	1.72221	5.81304	0	4.20235	4.123	0	3.69203	2.88418	7.20644	4.56699
NA	ENSMUSG00000012405	3.69904	97.5799	99.8884	62.2826	60.8194	41.183	54.4236	35.0014	54.4574	35.5715	59.7105	44.7565
Tmem167	ENSMUSG00000012422	0	24.0414	13.7777	110.448	101.366	73.1209	148.428	60.6122	42.4583	77.8728	142.07	134.269
Steap4	ENSMUSG00000012428	18.4952	0	0	0	1.50171	3.36188	3.2984	1.70739	11.0761	1.92279	18.5308	25.5751
Mplkip	ENSMUSG00000012429	0	1.4142	19.8054	41.5217	27.7817	93.2921	86.583	32.4403	11.0761	27.8804	102.949	93.1665
Kif11	ENSMUSG00000012443	3.69904	0	0	9.13478	8.25943	19.3308	15.6674	5.12216	7.38405	9.61393	6.17695	8.22057
Rpa3	ENSMUSG00000012483	0	0	6.88885	4.98261	8.25943	5.88329	6.5968	4.26846	3.69203	12.4981	7.20644	10.0474
Mlkl	ENSMUSG00000012519	1.84952	14.142	29.2776	16.6087	38.2937	30.2569	0	16.2202	27.6902	1.92279	13.3834	0
Phox2b	ENSMUSG00000012520	196.049	176.775	1.72221	5.81304	12.7646	0.84047	0	5.97585	14.7681	22.112	8.23593	10.9608
Tnpo3	ENSMUSG00000012535	355.108	345.065	403.859	470.026	558.637	459.737	916.955	536.119	538.113	517.229	400.472	506.935
Ttll5	ENSMUSG00000012609	1093.07	707.101	576.08	607.878	690.037	747.177	1013.43	913.451	787.325	1014.27	811.239	827.538
Zfp715	ENSMUSG00000012640	194.2	299.811	681.135	704.208	685.532	491.675	410.651	814.423	576.879	527.805	472.536	516.069
Retn	ENSMUSG00000012705	0	0	0	4.15217	7.50857	0.84047	4.9476	3.41477	1.84601	4.80696	12.3539	3.65359
Acpt	ENSMUSG00000012777	5.54856	7.07101	2.58332	4.98261	5.256	14.288	0.8246	11.9517	16.6141	10.5753	4.11796	18.2679
Cdh23	ENSMUSG00000012819	9.2476	0	41.3331	3.32174	18.7714	15.9689	23.0888	36.7088	28.6132	18.2665	38.0912	34.7091
Rps5	ENSMUSG00000012848	0	25.4556	53.3886	37.3695	49.5566	5.04282	51.9498	40.9773	11.0761	15.3823	55.5925	63.9378
Podnl1	ENSMUSG00000012889	1.84952	14.142	3.44443	4.15217	5.256	1.68094	0.8246	11.9517	1.84601	6.72975	5.14746	11.8742
Lphn1	ENSMUSG00000013033	1797.73	1499.05	1085.86	419.369	489.559	619.426	456.004	548.071	459.657	834.489	395.325	418.336
Amotl1	ENSMUSG00000013076	3798.91	3125.38	1407.05	715.004	965.602	841.31	454.355	494.288	910.085	1359.41	562.102	436.604
2200002J24Rik	ENSMUSG00000013083	0	0	0	0	0	0	0	0	0	0	0	0
Etv5	ENSMUSG00000013089	109.122	287.083	342.72	215.083	286.827	159.689	141.831	158.787	274.133	39.4171	66.9169	87.6861
Tmem190	ENSMUSG00000013091	0	28.284	8.61106	8.30434	26.28	18.4903	22.2642	4.26846	0.923007	9.61393	11.3244	9.13397
Gfod2	ENSMUSG00000013150	101.724	32.5266	50.8053	26.5739	30.0343	20.1713	28.861	5.97585	19.3831	26.919	14.4129	21.0081
Enkd1	ENSMUSG00000013155	0	1.4142	5.16664	27.4043	0.750857	4.20235	3.2984	20.4886	20.3061	5.76836	1.02949	5.48038
4933405L10Rik	ENSMUSG00000013158	1.84952	0	0	0	0.750857	0	0.8246	0	0.923007	0	1.02949	0
Atp6v0d1	ENSMUSG00000013160	11.0971	80.6095	171.36	164.426	46.5531	64.7162	76.6878	115.249	72.9175	98.062	121.48	144.317
Ptprs	ENSMUSG00000013236	6364.2	3896.12	2100.24	1170.08	1386.08	1416.19	1082.7	1616.04	1186.99	1702.63	912.129	1021.18
Slc41a1	ENSMUSG00000013275	1131.91	541.639	1005.77	290.652	564.644	658.928	455.179	311.598	534.421	337.449	346.939	351.658
Fer1l4	ENSMUSG00000013338	0	1.4142	0	1.66087	1.50171	1.68094	0.8246	1.70739	0	4.80696	0	14.6144
4931406B18Rik	ENSMUSG00000013353	66.5827	43.8402	19.8054	4.15217	6.00685	2.52141	4.9476	11.098	6.46105	6.72975	4.11796	2.74019
Iglon5	ENSMUSG00000013367	51.7865	21.213	22.3888	13.287	7.50857	37.8211	15.6674	19.6349	22.1522	11.5367	17.5014	42.0163
Igf2bp1	ENSMUSG00000013415	1.84952	0	3.44443	3.32174	0	2.52141	9.0706	2.56108	2.76902	5.76836	6.17695	8.22057
B4galnt2	ENSMUSG00000013418	0	0	52.5275	0	12.0137	1.68094	11.5444	0	0	6.72975	8.23593	3.65359
Zfp651	ENSMUSG00000013419	2385.88	1477.84	1049.69	408.574	686.283	612.702	174.815	556.608	473.502	392.248	234.724	274.019
Nelfb	ENSMUSG00000013465	120.219	135.763	136.055	132.87	222.254	126.07	92.3552	172.446	139.374	174.973	158.542	139.75
Card14	ENSMUSG00000013483	0	0	34.4443	24.913	9.76114	0	4.123	0	1.84601	23.0734	6.17695	0.913397
Tmem175	ENSMUSG00000013495	234.889	107.479	277.276	187.678	82.5943	206.756	408.177	116.956	146.758	208.622	223.4	174.459
Bcas1	ENSMUSG00000013523	3.69904	0	0	0	0	0.84047	0	0	0	0	0	3.65359
Tango2	ENSMUSG00000013539	373.603	250.314	1026.44	624.487	455.019	924.517	1168.46	772.592	648.874	1505.54	1716.16	1771.99
NA	ENSMUSG00000013562	1.84952	0	6.88885	0	0	0	0	0	0	0	0	0
Aldh1a2	ENSMUSG00000013584	0	0	0	10.7956	1.50171	12.607	4.123	15.3665	11.9991	3.84557	0	5.48038
Ndufs2	ENSMUSG00000013593	651.031	89.0947	287.61	264.909	259.046	255.503	554.956	502.825	434.736	389.364	416.944	328.823
Snx31	ENSMUSG00000013611	0	0	0	0	0.750857	0.84047	1.6492	0	0	0.961393	1.02949	2.74019
Atraid	ENSMUSG00000013622	18.4952	152.734	16.361	64.7739	95.3588	101.697	105.549	73.4176	60.9184	36.5329	51.4746	39.2761
Cad	ENSMUSG00000013629	282.976	202.231	173.944	111.278	141.912	303.41	273.767	84.5156	190.139	126.904	92.6542	129.702
Lypd8	ENSMUSG00000013643	0	0	0	0	0	0	0	0	4.61503	0	0	1.82679
Sh3bp5l	ENSMUSG00000013646	610.341	1083.28	880.912	704.208	437.75	502.601	486.514	505.386	409.815	561.453	454.006	427.47
1810065E05Rik	ENSMUSG00000013653	0	0	0	0	0	0	0	0	0	0	0	0
Atad1	ENSMUSG00000013662	22.1942	79.1953	61.9997	176.883	237.271	169.775	332.314	250.132	257.519	155.746	186.338	275.846
Pten	ENSMUSG00000013663	151.661	731.142	553.691	503.243	333.38	594.212	912.832	413.187	382.125	381.673	498.274	569.046
4933402N03Rik	ENSMUSG00000013668	1.84952	0	0	1.66087	0	3.36188	0.8246	0	0	1.92279	0	0
Pea15a	ENSMUSG00000013698	147.962	448.302	517.525	336.326	364.166	326.102	297.681	326.111	277.825	256.692	373.705	331.563
Timm23	ENSMUSG00000013701	18.4952	2.8284	48.222	83.8739	104.369	135.316	222.642	106.712	83.0706	104.792	219.282	141.577
Tnfaip8l2	ENSMUSG00000013707	20.3447	7.07101	1.72221	5.81304	2.25257	1.68094	3.2984	13.6591	0	12.4981	12.3539	14.6144
Trnt1	ENSMUSG00000013736	79.5293	57.9823	26.6943	130.378	167.441	105.059	145.954	159.641	147.681	113.444	115.303	105.041
Ly6g6e	ENSMUSG00000013766	0	0	0	0	0	0.84047	0	0	0	0	0	0
Ehmt2	ENSMUSG00000013787	2382.18	2631.83	1816.07	425.182	626.965	626.15	359.526	428.554	570.418	555.685	359.292	446.651
Elof1	ENSMUSG00000013822	20.3447	8.48521	0.861106	16.6087	6.00685	5.88329	3.2984	11.098	18.4601	30.7646	13.3834	21.9215
Med16	ENSMUSG00000013833	897.017	444.059	73.1941	157.783	147.168	181.541	144.305	180.129	111.684	125.942	159.571	80.3789
St3gal1	ENSMUSG00000013846	290.375	128.692	384.053	238.335	289.08	369.807	254.801	120.371	197.523	123.058	161.63	141.577
Tmem259	ENSMUSG00000013858	1063.47	2005.34	564.886	357.087	545.873	603.457	517.024	564.291	577.802	783.535	410.767	557.172
Rnf170	ENSMUSG00000013878	99.874	176.775	148.11	207.609	247.032	145.401	321.594	162.202	120.914	204.777	261.491	335.217
Clip3	ENSMUSG00000013921	375.452	60.8107	43.0553	19.9304	25.5291	42.8639	33.8086	39.2699	34.1512	41.3399	73.0939	42.0163
NA	ENSMUSG00000013928	0	0	0	0	0	0	0	0	0	0	0	0
Myl2	ENSMUSG00000013936	5611.44	5767.11	6763.13	6452.48	5091.56	5626.1	7165.77	8145.08	6585.65	9894.65	9217.03	7792.19
Dedd	ENSMUSG00000013973	98.0245	171.118	427.109	117.091	162.185	163.051	409.002	166.47	134.759	233.618	246.048	257.578
Mcemp1	ENSMUSG00000013974	0	0	0	0	0	0	0	0	4.61503	0	0	0
Nit1	ENSMUSG00000013997	116.52	66.4675	74.0552	90.5173	133.653	179.02	182.237	149.396	146.758	88.4481	92.6542	108.694
Pax5	ENSMUSG00000014030	3.69904	0	1.72221	0	0	0	0	0	0	0	1.02949	0
Prdm15	ENSMUSG00000014039	107.272	335.166	279.86	215.913	223.755	447.13	521.147	215.131	370.126	519.152	270.756	192.727
Rnf168	ENSMUSG00000014074	586.298	866.905	90.4162	138.683	183.96	216.001	84.9338	131.469	175.371	229.773	124.568	170.805
Tctex1d2	ENSMUSG00000014075	1.84952	83.4379	18.0832	35.7087	21.024	64.7162	97.3028	49.5142	44.3043	76.9114	82.3593	115.088
NA	ENSMUSG00000014077	29.5923	96.1657	169.638	161.104	124.642	136.156	258.1	128.054	179.986	72.1044	113.244	127.876
Sval2	ENSMUSG00000014104	0	0	0	0	0	0	0	0	0	0	0	0
Trpv4	ENSMUSG00000014158	18.4952	43.8402	33.5832	2.4913	3.00343	14.288	13.1936	10.2443	16.6141	13.4595	4.11796	31.0555
Klhl3	ENSMUSG00000014164	48.0875	5.65681	4.30553	71.4174	12.7646	79.8446	105.549	29.0256	89.5316	145.17	80.3003	99.5603
Tvp23b	ENSMUSG00000014177	20.3447	16.9704	35.3054	15.7783	3.00343	27.7355	61.0204	9.39062	13.8451	13.4595	16.4719	21.0081
Dnajc7	ENSMUSG00000014195	379.151	478	579.525	661.026	673.519	671.535	782.545	627.464	628.568	846.025	800.944	791.915
Zfp385c	ENSMUSG00000014198	3.69904	7.07101	6.02775	9.96521	6.00685	2.52141	4.9476	10.2443	4.61503	11.5367	17.5014	9.13397
Cacybp	ENSMUSG00000014226	5.54856	8.48521	33.5832	23.2522	16.5189	15.9689	64.3188	14.5128	55.3804	42.3013	32.9437	34.7091
Cluap1	ENSMUSG00000014232	114.67	117.379	30.9998	75.5695	112.629	61.3543	32.984	56.3437	62.7644	87.4867	58.681	78.5521
Zswim7	ENSMUSG00000014243	175.704	0	6.02775	10.7956	10.512	14.288	39.5808	29.0256	19.3831	11.5367	18.5308	23.7483
Pigl	ENSMUSG00000014245	177.554	1001.25	213.554	249.13	299.592	167.253	117.093	148.543	193.831	310.53	287.228	260.318
Ndufa2	ENSMUSG00000014294	5.54856	0	0.861106	20.7609	33.7886	11.7666	16.492	26.4645	25.8442	33.6487	31.9142	21.9215
Pam16	ENSMUSG00000014301	0	4.2426	11.1944	24.0826	13.5154	5.04282	18.1412	48.6605	18.4601	42.3013	17.5014	21.9215
Glis2	ENSMUSG00000014303	220.093	268.698	133.472	152.8	87.0994	200.872	89.0568	81.9545	79.3786	92.2937	83.3888	101.387
Cox6c	ENSMUSG00000014313	107.272	18.3846	188.582	219.235	184.711	310.133	535.99	250.986	228.906	278.804	426.209	432.95
Bicc1	ENSMUSG00000014329	214.544	301.225	118.833	129.548	157.68	77.3232	61.845	142.567	158.757	100.946	85.4478	100.474
Ube2z	ENSMUSG00000014349	42.5389	19.7988	178.249	95.5	72.8331	73.9613	189.658	98.1747	115.376	67.2975	65.8874	73.0718
Gip	ENSMUSG00000014351	0	0	0	0.830434	0	0	0	0	0	0	0	0
Tmem87b	ENSMUSG00000014353	142.413	80.6095	192.888	352.935	391.947	283.238	306.751	299.646	272.287	197.085	298.552	390.021
Anapc1	ENSMUSG00000014355	645.482	555.781	799.968	1008.15	1163.08	754.742	1359.77	1034.68	963.619	676.82	745.352	753.553
Mertk	ENSMUSG00000014361	3.69904	70.7101	18.0832	32.3869	66.8263	12.607	17.3166	36.7088	47.0733	73.0658	22.6488	21.0081
Tsg101	ENSMUSG00000014402	0	117.379	73.1941	78.8913	86.3485	94.9731	140.182	92.1988	80.3016	91.3323	84.4183	49.3234
Hps5	ENSMUSG00000014418	168.306	111.722	147.249	179.374	229.011	200.872	272.943	197.203	150.45	216.313	172.955	220.129
Map3k4	ENSMUSG00000014426	1174.44	1035.2	588.997	375.356	823.69	475.706	166.569	517.338	870.395	496.079	296.493	384.54
Piezo1	ENSMUSG00000014444	2872.3	2295.25	1395.85	400.269	1325.26	456.375	418.072	441.359	425.506	257.653	239.871	168.978
Blk	ENSMUSG00000014453	1056.08	1582.49	2162.24	1531.32	1235.91	1844.83	1156.91	1484.57	1117.76	1207.51	817.416	878.688
Rnf166	ENSMUSG00000014470	575.2	125.864	145.527	137.022	77.3383	118.506	126.164	150.25	65.5335	269.19	118.391	140.663
Ankrd28	ENSMUSG00000014496	601.094	584.065	450.359	869.465	1256.18	623.628	654.732	1016.75	1282.98	329.758	431.357	542.558
Ankrd52	ENSMUSG00000014498	2093.66	1122.88	1647.3	989.878	767.376	1210.28	996.941	861.376	871.318	1055.61	865.802	1170.06
Pkd2l2	ENSMUSG00000014503	66.5827	130.107	201.499	160.274	94.608	149.604	190.483	145.128	117.222	402.823	303.7	441.171
Srp19	ENSMUSG00000014504	9.2476	45.2544	55.1108	112.939	56.3143	52.9496	199.553	61.4659	119.991	59.6063	153.394	84.0325
Tmbim7	ENSMUSG00000014529	0	1.4142	0	0	0	0.84047	1.6492	0	0	0	0	2.74019
Clec4f	ENSMUSG00000014542	1.84952	0	0	0	0	0	0.8246	0	0	0	1.02949	0
Klra17	ENSMUSG00000014543	0	0	0	0	0	0	0	1.70739	0	0	0	0
Wdfy2	ENSMUSG00000014547	55.4856	79.1953	52.5275	41.5217	52.56	61.3543	59.3712	77.686	60.9184	78.8342	61.7695	35.6225
Zfyve20	ENSMUSG00000014550	83.2284	49.497	68.0274	159.443	102.867	144.561	239.134	116.102	78.4556	140.363	90.5952	116.915
Mrps25	ENSMUSG00000014551	1.84952	77.7811	214.416	125.396	106.622	238.693	215.221	120.371	138.451	167.282	298.552	196.38
Dguok	ENSMUSG00000014554	9.2476	21.213	23.2499	68.0956	50.3074	104.218	59.3712	57.1974	65.5335	80.757	99.8606	132.443
Camta1	ENSMUSG00000014592	11579.8	8099.13	9249.14	5793.94	7623.45	5382.37	3313.24	5345.82	5910.93	2990.89	2763.15	2776.73
Csf1	ENSMUSG00000014599	1041.28	1657.44	1158.19	869.465	916.045	1352.32	1047.24	1400.06	1259.9	1499.77	1523.65	1825.88
Strip1	ENSMUSG00000014601	308.87	384.663	341.859	374.526	327.374	224.405	217.694	348.307	326.744	372.059	278.992	191.813
Kif1a	ENSMUSG00000014602	262.632	442.645	134.333	21.5913	31.536	20.1713	6.5968	24.7571	18.4601	12.4981	8.23593	3.65359
Alx3	ENSMUSG00000014603	0	0	0	0	0	0	0	0	0	0	0	0
Slc25a11	ENSMUSG00000014606	48.0875	152.734	176.527	182.696	129.147	258.865	292.733	250.986	224.291	293.225	364.44	423.816
Chrne	ENSMUSG00000014609	1.84952	2.8284	0.861106	7.47391	9.01028	5.04282	4.9476	0.853693	11.0761	7.69114	2.05898	2.74019
Cmc2	ENSMUSG00000014633	31.4418	55.1539	72.3329	17.4391	36.0411	85.7279	39.5808	37.5625	44.3043	51.9152	63.8285	46.5833
Chfr	ENSMUSG00000014668	172.005	120.207	268.665	351.274	291.332	246.258	360.35	324.403	239.059	184.587	402.531	432.037
Ceacam16	ENSMUSG00000014686	0	7.07101	0	0.830434	0	0	0	0	0	0.961393	0	0
Hoxa2	ENSMUSG00000014704	0	1.4142	0.861106	1.66087	0.750857	0	0	0	0	0	0	0.913397
Adam28	ENSMUSG00000014725	5.54856	0	2.58332	8.30434	1.50171	2.52141	3.2984	4.26846	2.76902	5.76836	4.11796	6.39378
Ankrd53	ENSMUSG00000014747	0	4.2426	14.6388	1.66087	0.750857	0.84047	8.246	0.853693	0	1.92279	10.2949	8.22057
Tex261	ENSMUSG00000014748	131.316	76.3669	212.693	83.0434	78.84	147.923	126.164	118.663	119.991	91.3323	82.3593	94.0799
Fam120b	ENSMUSG00000014763	260.782	520.426	833.551	884.413	811.676	446.289	578.869	746.127	793.786	968.122	887.421	725.237
Tbp	ENSMUSG00000014767	617.739	316.781	168.777	323.869	395.702	430.32	616.801	414.041	393.201	410.515	454.006	435.69
Psmb1	ENSMUSG00000014769	0	55.1539	88.694	122.904	75.0857	51.2686	48.6514	91.3451	69.2255	55.7608	100.89	57.544
Pdcd2	ENSMUSG00000014771	0	0	0	0	0	0	0	0	0	0	0	0
Dll1	ENSMUSG00000014773	0	0	0.861106	6.64348	1.50171	1.68094	0	4.26846	11.9991	14.4209	5.14746	3.65359
Nol3	ENSMUSG00000014776	90.6264	480.828	124.86	110.448	108.123	121.868	134.41	151.104	143.066	91.3323	75.1529	102.3
Fhod1	ENSMUSG00000014778	1113.41	667.503	869.718	362.069	532.357	530.336	310.874	335.501	417.199	220.159	218.252	313.295
Plekhg4	ENSMUSG00000014782	5.54856	4.2426	5.16664	0	0	4.20235	12.369	2.56108	0.923007	4.80696	6.17695	7.30718
Slc9a5	ENSMUSG00000014786	373.603	350.722	152.416	52.3174	124.642	43.7044	36.2824	51.2216	50.7654	6.72975	24.7078	38.3627
Elmo3	ENSMUSG00000014791	262.632	197.988	137.777	69.7565	208.738	200.032	236.66	80.2471	165.218	171.128	125.598	122.395
Stc1	ENSMUSG00000014813	1.84952	0	0	1.66087	0	5.04282	1.6492	11.098	22.1522	0	8.23593	0
4931428F04Rik	ENSMUSG00000014837	22.1942	2.8284	0	24.0826	14.2663	28.576	9.8952	4.26846	29.5362	13.4595	18.5308	22.8349
Tppp3	ENSMUSG00000014846	177.554	39.5976	9.47217	47.3348	21.7748	136.156	87.4076	70.0028	47.9963	54.7994	80.3003	42.0163
Msh3	ENSMUSG00000014850	196.049	49.497	72.3329	193.491	322.868	310.133	234.186	261.23	276.902	282.649	337.673	290.46
Adamts13	ENSMUSG00000014852	0	1.4142	0	0.830434	0	0	9.0706	0.853693	0.923007	0	0	0.913397
Tmem208	ENSMUSG00000014856	5.54856	16.9704	119.694	160.274	87.0994	113.463	64.3188	99.8821	95.9927	87.4867	126.627	167.152
E2f4	ENSMUSG00000014859	521.564	1407.13	208.388	193.491	290.582	172.296	284.487	180.129	186.447	191.317	157.512	198.207
Surf4	ENSMUSG00000014867	3.69904	67.8817	81.8051	88.8565	45.0514	79.8446	258.924	114.395	92.3007	158.63	102.949	142.49
Surf2	ENSMUSG00000014873	307.02	487.899	384.915	352.104	321.367	301.729	262.223	368.795	299.977	382.634	404.59	335.217
Dnajb9	ENSMUSG00000014905	38.8399	2.8284	26.6943	64.7739	102.867	7.56423	28.861	23.9034	17.5371	24.0348	54.563	77.6388
Naf1	ENSMUSG00000014907	122.068	186.675	17.2221	97.1608	48.0548	86.5684	52.7744	20.4886	18.4601	27.8804	37.0617	42.0163
Yes1	ENSMUSG00000014932	173.855	176.775	264.36	555.561	608.945	354.678	141.007	304.768	510.423	224.966	225.459	274.933
Ppp1cb	ENSMUSG00000014956	3.69904	326.68	171.36	184.356	198.977	205.075	392.51	196.349	138.451	67.2975	128.686	209.168
Gorasp2	ENSMUSG00000014959	24.0437	127.278	259.193	119.583	159.182	122.709	151.726	176.714	151.373	123.058	154.424	155.278
Tsen15	ENSMUSG00000014980	1.84952	15.5562	22.3888	55.6391	15.768	32.7783	155.025	47.8068	19.3831	32.6873	64.8579	62.111
Oc90	ENSMUSG00000015001	0	0	12.0555	5.81304	0.750857	0	6.5968	0	1.84601	2.88418	0	5.48038
Efr3a	ENSMUSG00000015002	286.675	197.988	466.72	536.461	381.435	388.297	576.395	362.819	471.656	512.422	472.536	436.604
Trappc2l	ENSMUSG00000015013	0	0	0	5.81304	6.00685	5.88329	3.2984	7.68323	2.76902	27.8804	11.3244	21.0081
Acsf3	ENSMUSG00000015016	116.52	36.7692	174.805	130.378	135.154	195.829	71.7402	79.3934	100.608	197.085	149.276	133.356
Ddx19a	ENSMUSG00000015023	310.719	149.905	189.443	246.639	232.015	291.643	307.576	149.396	170.756	123.058	164.719	188.16
Galns	ENSMUSG00000015027	523.414	65.0533	197.193	76.4	268.807	71.4399	54.4236	120.371	141.22	86.5253	43.2386	53.8904
Gata2	ENSMUSG00000015053	0	9.89941	21.5277	5.81304	4.50514	38.6616	19.7904	0.853693	11.9991	3.84557	22.6488	0.913397
C8g	ENSMUSG00000015083	0	14.142	0	6.64348	0.750857	2.52141	2.4738	4.26846	1.84601	8.65253	7.20644	2.74019
Entpd2	ENSMUSG00000015085	7.39808	18.3846	3.44443	3.32174	13.5154	67.2376	2.4738	23.0497	8.30706	11.5367	9.26542	11.8742
Rabl6	ENSMUSG00000015087	2961.08	2293.83	871.44	1350.29	1606.08	1119.51	1017.56	1517.87	1413.12	1813.19	1131.41	1433.12
Ptgds	ENSMUSG00000015090	1801.43	380.42	818.051	367.052	329.626	967.38	950.764	483.19	569.495	1242.12	1006.84	1243.13
NA	ENSMUSG00000015092	251.535	107.479	232.499	53.9782	101.366	164.732	103.075	146.835	107.992	179.78	199.721	126.049
Clic3	ENSMUSG00000015093	42.5389	65.0533	183.416	57.3	33.0377	90.7707	59.3712	53.7826	18.4601	84.6025	63.8285	69.4182
Npdc1	ENSMUSG00000015094	110.971	254.556	148.971	81.3826	114.881	91.6112	19.7904	124.639	116.299	54.7994	89.5657	30.1421
Fbxw5	ENSMUSG00000015095	427.239	1223.28	778.44	633.621	615.703	459.737	415.598	867.352	765.172	783.535	538.424	638.465
Slc25a13	ENSMUSG00000015112	5.54856	32.5266	446.053	249.13	256.793	322.74	574.746	420.017	419.045	296.109	528.129	313.295
Ube2i	ENSMUSG00000015120	286.675	492.142	511.497	589.608	699.048	791.722	764.404	595.878	612.876	793.149	754.617	820.231
Tsr3	ENSMUSG00000015126	135.015	38.1834	10.3333	84.7043	91.6045	53.7901	14.8428	87.0767	54.4574	73.0658	56.622	38.3627
Unkl	ENSMUSG00000015127	946.954	494.97	371.998	205.948	279.319	440.406	152.551	172.446	274.133	238.425	316.054	253.924
Lrrk1	ENSMUSG00000015133	469.778	1038.02	335.832	180.204	262.049	159.689	115.444	160.494	147.681	162.475	126.627	106.867
Aldh1a3	ENSMUSG00000015134	0	9.89941	9.47217	6.64348	42.7988	21.0117	9.0706	1.70739	3.69203	3.84557	5.14746	18.2679
Actn1	ENSMUSG00000015143	4041.2	2810.02	930.856	667.669	858.98	584.967	185.535	384.162	427.352	132.672	228.547	114.175
Sirt2	ENSMUSG00000015149	1222.53	540.225	1148.72	721.647	602.187	579.924	313.348	579.657	371.972	482.619	560.043	513.329
Hnrnpl	ENSMUSG00000015165	5825.99	6004.7	4475.17	3428.03	3253.46	5748.81	4778.56	3980.77	3905.24	5738.55	5353.35	5768.1
Nolc1	ENSMUSG00000015176	1374.19	755.183	185.138	256.604	348.398	279.876	181.412	278.304	288.901	467.237	259.432	232.003
Casd1	ENSMUSG00000015189	0	12.7278	2.58332	77.2304	50.3074	42.0235	66.7926	89.6377	54.4574	59.6063	80.3003	71.245
Cnksr3	ENSMUSG00000015202	1843.97	851.349	611.386	490.787	434.746	656.407	1171.76	612.951	512.269	858.524	1039.79	959.98
Mtmr1	ENSMUSG00000015214	638.084	422.846	818.912	264.909	479.798	363.923	396.633	455.018	435.659	422.051	352.086	360.792
Hmgb3	ENSMUSG00000015217	133.165	140.006	210.11	139.513	164.438	122.709	230.888	179.275	118.145	226.889	204.869	177.199
Map2	ENSMUSG00000015222	125.767	56.5681	6.02775	8.30434	9.76114	20.1713	35.4578	11.098	7.38405	1.92279	17.5014	10.9608
Cyp2j9	ENSMUSG00000015224	0	0	6.02775	3.32174	1.50171	0.84047	0	0	0	0.961393	0	3.65359
Nipsnap3a	ENSMUSG00000015242	0	0	0	0	0	1.68094	0	0	0	0	0	0
Abca1	ENSMUSG00000015243	68.4322	213.544	293.637	242.487	241.776	219.363	300.154	243.302	254.75	259.576	402.531	492.321
Nipsnap3b	ENSMUSG00000015247	0	2.8284	2.58332	0	7.50857	0.84047	0	0	8.30706	0.961393	0	0
Lage3	ENSMUSG00000015289	0	5.65681	0.861106	11.6261	9.01028	26.0546	29.6856	16.2202	9.23007	11.5367	13.3834	34.7091
NA	ENSMUSG00000015290	55.4856	59.3965	78.3607	63.113	47.304	84.8874	79.1616	56.3437	44.3043	40.3785	67.9464	59.3708
Gdi1	ENSMUSG00000015291	1888.36	2377.27	2902.79	1775.47	2304.38	1577.56	1789.38	1496.52	1635.57	1060.42	900.805	823.884
Sash1	ENSMUSG00000015305	271.879	923.473	249.721	197.643	169.694	233.651	151.726	194.642	187.37	115.367	219.282	192.727
Gadd45b	ENSMUSG00000015312	79.5293	70.7101	85.2495	16.6087	105.12	44.5449	18.1412	44.392	22.1522	9.61393	9.26542	47.4966
Slamf6	ENSMUSG00000015314	1.84952	4.2426	0	0.830434	0	0	1.6492	0.853693	1.84601	0	3.08847	0.913397
Slamf1	ENSMUSG00000015316	0	1.4142	0	0	0	0	0	0	0	4.80696	0	0
Zdhhc12	ENSMUSG00000015335	29.5923	8.48521	0	4.98261	11.2629	7.56423	9.8952	8.53693	0.923007	5.76836	3.08847	4.56699
Endog	ENSMUSG00000015337	0	1.4142	24.9721	3.32174	3.00343	5.04282	9.0706	13.6591	3.69203	2.88418	14.4129	7.30718
Cybb	ENSMUSG00000015340	0	2.8284	0.861106	11.6261	3.75428	6.72376	14.8428	22.196	0.923007	2.88418	6.17695	1.82679
Golga7	ENSMUSG00000015341	826.735	111.722	56.833	131.209	150.922	100.016	152.551	180.129	90.4546	132.672	136.922	158.018
Xk	ENSMUSG00000015342	48.0875	132.935	64.583	114.6	47.304	97.4945	51.9498	89.6377	92.3007	61.5291	53.5335	73.0718
Pcolce2	ENSMUSG00000015354	1.84952	0	6.02775	32.3869	18.0206	29.4164	3.2984	26.4645	7.38405	24.9962	31.9142	21.0081
Cd48	ENSMUSG00000015355	0	0	0	0	0	0	0.8246	0	0	0	0	0
Clpx	ENSMUSG00000015357	44.3885	134.349	540.775	244.978	393.449	365.604	677.821	355.136	388.586	330.719	499.303	507.849
Trabd	ENSMUSG00000015363	693.57	379.006	470.164	252.452	280.07	437.885	342.209	221.106	326.744	379.75	251.196	232.003
Mov10l1	ENSMUSG00000015365	1.84952	56.5681	11.1944	63.9434	37.5428	115.144	169.043	69.1491	95.0697	141.325	75.1529	161.671
Dennd6b	ENSMUSG00000015377	3410.51	2435.25	1042.8	678.465	519.593	978.307	904.586	682.101	508.577	939.281	638.285	648.512
Cd83	ENSMUSG00000015396	0	0	0	2.4913	0	0	2.4738	13.6591	7.38405	0	0	0.913397
Tmem27	ENSMUSG00000015401	0	0	0	0	3.75428	0	0	0	0	0	0	0
Ace2	ENSMUSG00000015405	0	0	0.861106	11.6261	0	0	0	0	0	0	0	0.913397
Gzmb	ENSMUSG00000015437	0	0	0	0	0	0	0	0	0	0	0	0
Gzmf	ENSMUSG00000015441	0	0	0	0	0	0	0	0	0	0	0	0
Gzmn	ENSMUSG00000015443	0	0	0	0	0	0	0	0	0	0	0	0
NA	ENSMUSG00000015451	16.6457	31.1124	12.9166	20.7609	17.2697	24.3736	30.5102	20.4886	39.6893	14.4209	15.4424	11.8742
Ager	ENSMUSG00000015452	0	0	4.30553	1.66087	18.7714	18.4903	0	5.12216	2.76902	1.92279	10.2949	1.82679
Atf6b	ENSMUSG00000015461	963.6	1151.16	446.053	249.961	135.905	396.702	155.849	111.834	142.143	106.715	96.7722	121.482
Egfl8	ENSMUSG00000015467	0	0	12.9166	11.6261	3.00343	28.576	9.8952	11.098	7.38405	11.5367	27.7963	24.6617
Notch4	ENSMUSG00000015468	88.7769	125.864	43.9164	34.8782	44.3006	165.573	23.9134	110.126	45.2273	46.1468	61.7695	43.8431
Ppt2	ENSMUSG00000015474	1.84952	111.722	12.0555	7.47391	19.5223	30.2569	69.2664	49.5142	52.6114	34.6101	29.8552	35.6225
Prrt1	ENSMUSG00000015476	9.2476	11.3136	0	2.4913	9.76114	5.88329	3.2984	2.56108	4.61503	24.0348	9.26542	2.74019
Rnf5	ENSMUSG00000015478	90.6264	12.7278	35.3054	12.4565	13.5154	21.0117	28.861	31.5866	11.0761	16.3437	9.26542	7.30718
Fam163a	ENSMUSG00000015484	1.84952	2.8284	4.30553	0.830434	0	0.84047	1.6492	1.70739	2.76902	0.961393	1.02949	0.913397
Cacfd1	ENSMUSG00000015488	586.298	425.675	376.304	145.326	191.468	284.079	331.489	184.398	149.527	298.993	219.282	342.524
Hivep2	ENSMUSG00000015501	4825.4	2296.66	2231.99	1043.86	1840.35	1162.37	1549.42	1547.75	1332.82	1278.65	1320.84	1095.16
2310057J18Rik	ENSMUSG00000015519	0	0	0	0	0.750857	0	0.8246	0	0	0	2.05898	0.913397
Arnt	ENSMUSG00000015522	1067.17	1588.15	1167.66	867.804	1002.39	810.213	858.409	1003.09	1005.15	712.392	783.443	807.443
Itga2	ENSMUSG00000015533	0	16.9704	18.0832	20.7609	4.50514	15.1285	26.3872	11.9517	27.6902	5.76836	13.3834	10.9608
Mocs2	ENSMUSG00000015536	12.9466	1.4142	130.027	226.709	220.752	268.11	547.534	201.471	140.297	179.78	278.992	348.004
Nat9	ENSMUSG00000015542	11.0971	21.213	30.9998	120.413	78.0891	33.6188	44.5284	94.7599	93.2237	67.2975	83.3888	42.0163
Lpl	ENSMUSG00000015568	2526.44	1152.57	2326.71	2034.56	1271.95	2989.55	5756.53	3329.4	2879.78	6751.86	9186.15	8794.19
Atp6v0e	ENSMUSG00000015575	42.5389	24.0414	275.554	192.661	186.212	242.896	328.191	140.006	163.372	136.518	212.075	241.137
Nkx2-5	ENSMUSG00000015579	238.588	475.172	246.276	47.3348	107.373	163.051	112.146	88.784	148.604	73.0658	106.038	131.529
Zfp318	ENSMUSG00000015597	1679.36	1134.19	1406.19	1111.12	1238.16	1023.69	599.484	1113.22	1122.38	961.393	988.312	1092.42
Ttbk1	ENSMUSG00000015599	83.2284	114.55	21.5277	10.7956	7.50857	7.56423	4.9476	8.53693	8.30706	21.1506	14.4129	19.1813
Srf	ENSMUSG00000015605	3920.98	2385.76	879.19	472.517	496.316	465.62	263.872	414.041	503.962	388.403	377.823	354.398
Gata3	ENSMUSG00000015619	0	1.4142	6.88885	4.15217	3.00343	4.20235	6.5968	5.12216	5.53804	2.88418	2.05898	6.39378
Gata5	ENSMUSG00000015627	9.2476	4.2426	5.16664	6.64348	7.50857	6.72376	3.2984	11.098	2.76902	17.3051	7.20644	8.22057
Lama5	ENSMUSG00000015647	11635.3	8659.15	7868.79	2809.36	3753.53	4846.15	3912.73	3263.67	3606.19	5608.76	5154.66	5554.37
Steap1	ENSMUSG00000015652	0	0	0	0	0	0	0	0	0	0	0	0
Steap2	ENSMUSG00000015653	46.238	29.6982	21.5277	3.32174	18.7714	16.8094	6.5968	19.6349	14.7681	5.76836	7.20644	3.65359
Hspa8	ENSMUSG00000015656	1403.79	1302.48	1345.91	2020.45	1787.79	1106.9	1958.43	1691.17	1418.66	893.134	3006.11	2180.28
Serac1	ENSMUSG00000015659	575.2	534.568	657.024	754.865	900.277	981.668	926.026	694.906	910.085	679.705	1022.28	1225.78
Awat1	ENSMUSG00000015665	0	0	0	0	0	0	0	0	0	0	0	0
Pdzd11	ENSMUSG00000015668	62.8837	46.6686	135.194	57.3	64.5737	29.4164	106.373	58.0511	39.6893	43.2627	49.4156	42.0163
Psma2	ENSMUSG00000015671	29.5923	1.4142	18.0832	16.6087	45.0514	14.288	32.984	36.7088	12.9221	4.80696	42.2091	28.3153
Mrpl32	ENSMUSG00000015672	0	8.48521	16.361	58.9608	31.536	10.0856	15.6674	59.7585	42.4583	49.9924	70.0054	45.6699
Setdb1	ENSMUSG00000015697	405.045	475.172	705.246	561.374	638.979	881.653	892.217	643.684	715.33	555.685	599.164	787.348
Anxa9	ENSMUSG00000015702	0	24.0414	38.7498	34.8782	27.7817	85.7279	9.8952	27.3182	49.8424	40.3785	38.0912	19.1813
Arnt2	ENSMUSG00000015709	16.6457	32.5266	12.9166	33.2174	42.048	30.2569	5.7722	29.0256	10.1531	13.4595	8.23593	11.8742
Prune	ENSMUSG00000015711	36.9904	110.308	520.108	173.561	232.766	127.751	249.854	168.177	134.759	133.634	73.0939	81.2923
Cers2	ENSMUSG00000015714	593.696	753.769	1309.74	675.143	572.904	796.765	539.288	574.535	539.959	389.364	345.909	371.753
Nlrp5	ENSMUSG00000015721	0	0	5.16664	2.4913	0.750857	8.4047	9.0706	0.853693	1.84601	4.80696	1.02949	1.82679
Capza2	ENSMUSG00000015733	85.0779	82.0237	20.6666	111.278	72.0823	146.242	238.309	105.004	107.992	122.097	161.63	137.923
Plekho1	ENSMUSG00000015745	6649.02	6247.94	2444.68	987.387	1510.72	689.185	305.927	796.495	970.08	499.924	275.904	181.766
Vps45	ENSMUSG00000015747	16.6457	103.237	25.8332	82.213	116.383	104.218	65.1434	87.0767	75.6865	99.0234	57.6515	131.529
Prpf3	ENSMUSG00000015748	196.049	504.87	752.607	499.922	352.152	668.173	596.186	462.701	355.358	391.287	339.732	369.926
Anp32e	ENSMUSG00000015749	170.156	151.32	135.194	117.091	93.8571	48.7472	53.599	106.712	129.221	62.4905	82.3593	49.3234
Aph1a	ENSMUSG00000015750	51.7865	26.8698	130.888	117.091	48.0548	139.518	261.398	62.3196	63.6875	126.904	132.804	99.5603
Tab2	ENSMUSG00000015755	810.089	988.527	382.331	823.791	875.499	555.55	758.632	846.863	891.624	776.805	717.555	774.561
Ppil4	ENSMUSG00000015757	234.889	247.485	271.249	396.948	458.774	257.184	304.277	430.261	455.042	431.665	336.644	364.445
Cnih1	ENSMUSG00000015759	0	5.65681	3.44443	13.287	22.5257	3.36188	0	4.26846	13.8451	16.3437	3.08847	7.30718
Eps8	ENSMUSG00000015766	116.52	113.136	47.3609	24.0826	19.5223	17.6499	47.0022	21.3423	22.1522	20.1892	19.5603	28.3153
Med22	ENSMUSG00000015776	0	101.822	12.0555	38.2	53.3108	12.607	121.216	53.7826	25.8442	80.757	66.9169	50.2368
Abo	ENSMUSG00000015787	0	0	0	0	0	0	0	0	0	0	0	0
Surf1	ENSMUSG00000015790	68.4322	168.29	58.5552	34.8782	30.0343	30.2569	109.672	24.7571	34.1512	10.5753	52.5041	50.2368
Med28	ENSMUSG00000015804	0	16.9704	211.832	18.2696	3.00343	39.5021	240.783	26.4645	18.4601	12.4981	40.1502	34.7091
Qdpr	ENSMUSG00000015806	1.84952	9.89941	5.16664	9.13478	57.816	30.2569	10.7198	27.3182	10.1531	24.0348	24.7078	34.7091
Gnrh1	ENSMUSG00000015812	0	1.4142	17.2221	41.5217	21.7748	45.3854	115.444	38.4162	34.1512	32.6873	87.5068	45.6699
Tnr	ENSMUSG00000015829	0	0	3.44443	0	0.750857	0	2.4738	0	10.1531	2.88418	4.11796	0.913397
Sqstm1	ENSMUSG00000015837	1501.81	487.899	601.052	818.808	612.699	356.359	690.19	439.652	488.27	384.557	534.306	510.589
Nfe2l2	ENSMUSG00000015839	943.255	1268.54	1278.74	1839.41	1742.74	616.064	998.591	1872.15	1501.73	1447.86	1397.02	1285.15
Rxrg	ENSMUSG00000015843	737.958	103.237	179.971	61.4521	153.175	131.113	268.82	145.981	100.608	250.923	196.633	182.679
Rxra	ENSMUSG00000015846	270.03	159.805	177.388	163.596	163.687	116.825	258.1	170.739	161.526	200.931	249.137	202.774
Adamtsl4	ENSMUSG00000015850	4081.89	2812.85	3969.7	1077.9	1762.26	2482.75	1001.89	1151.63	1633.72	1245.96	1091.26	1274.19
Fcrls	ENSMUSG00000015852	0	2.8284	0	4.98261	3.00343	9.24517	2.4738	8.53693	5.53804	0.961393	3.08847	0
Cd5l	ENSMUSG00000015854	0	0	0	0	0	0	0	0	0	0	0	0
Prpsap1	ENSMUSG00000015869	122.068	57.9823	434.859	284.839	310.104	234.491	250.678	492.581	309.207	287.456	360.322	319.689
Fam184b	ENSMUSG00000015879	162.758	12.7278	0	21.5913	18.7714	2.52141	73.3894	3.41477	6.46105	23.0734	4.11796	10.0474
Ncapg	ENSMUSG00000015880	0	2.8284	1.72221	4.98261	0	1.68094	0	8.53693	1.84601	0	7.20644	7.30718
Lcorl	ENSMUSG00000015882	3.69904	19.7988	56.833	76.4	120.137	108.421	42.0546	73.4176	94.1467	40.3785	122.509	66.678
Lta4h	ENSMUSG00000015889	136.864	172.533	229.915	209.269	204.984	153.806	101.426	147.689	218.753	124.981	180.161	214.648
Amdhd1	ENSMUSG00000015890	0	0	0	24.0826	0	0	0	0	0.923007	0	0	0
Dstn	ENSMUSG00000015932	107.272	79.1953	56.833	272.382	221.503	202.553	232.537	300.5	175.371	273.997	228.547	291.374
H2afy	ENSMUSG00000015937	1884.66	859.834	887.801	682.617	554.132	898.462	682.769	618.074	613.799	619.137	519.893	455.785
Gtf2ird2	ENSMUSG00000015942	12.9466	159.805	149.833	97.9913	107.373	154.646	157.499	122.932	87.6856	190.356	236.783	189.073
Bola1	ENSMUSG00000015943	0	1.4142	0	14.1174	45.8023	31.9378	29.6856	36.7088	17.5371	3.84557	8.23593	14.6144
Gatsl2	ENSMUSG00000015944	234.889	248.899	380.609	179.374	101.366	283.238	178.938	65.7343	197.523	135.556	160.601	166.238
Fcgr1	ENSMUSG00000015947	0	1.4142	0	0.830434	8.25943	1.68094	10.7198	2.56108	0.923007	1.92279	0	4.56699
Ncf1	ENSMUSG00000015950	0	72.1243	15.4999	24.913	9.01028	5.88329	84.1092	17.0739	6.46105	57.6836	11.3244	16.4411
Wnt11	ENSMUSG00000015957	57.3351	1.4142	24.9721	0.830434	3.75428	29.4164	14.0182	70.8565	30.4592	8.65253	12.3539	21.9215
Adss	ENSMUSG00000015961	16.6457	93.3373	57.6941	337.156	489.559	108.421	238.309	412.334	437.505	243.232	259.432	226.522
1700016C15Rik	ENSMUSG00000015962	0	0	0	0	0	0	0	0	0	0	0	1.82679
Il17rb	ENSMUSG00000015966	1.84952	8.48521	8.61106	3.32174	11.2629	11.7666	29.6856	14.5128	4.61503	17.3051	43.2386	47.4966
Cacna1d	ENSMUSG00000015968	51.7865	210.716	41.3331	67.2652	84.8468	66.3971	89.0568	83.6619	57.2264	89.4095	64.8579	63.0244
Chdh	ENSMUSG00000015970	0	0	0	3.32174	1.50171	5.04282	3.2984	5.12216	4.61503	0.961393	6.17695	0.913397
Actr8	ENSMUSG00000015971	135.015	114.55	40.472	88.026	124.642	179.02	126.988	99.8821	179.063	135.556	123.539	103.214
Lrrc27	ENSMUSG00000015980	153.51	223.444	241.971	137.852	131.4	117.666	126.164	101.589	91.3777	156.707	116.333	80.3789
Stk32c	ENSMUSG00000015981	0	8.48521	50.8053	3.32174	6.75771	0	15.6674	8.53693	4.61503	0	1.02949	6.39378
Fnta	ENSMUSG00000015994	3.69904	7.07101	53.3886	84.7043	63.8228	54.6305	141.007	110.98	56.3034	60.5677	124.568	84.0325
Skiv2l2	ENSMUSG00000016018	214.544	370.521	85.2495	479.991	524.098	224.405	190.483	509.655	410.738	518.191	330.467	359.878
Lbp	ENSMUSG00000016024	3.69904	8.48521	6.88885	14.1174	2.25257	3.36188	0	11.9517	35.0743	9.61393	0	10.9608
Celsr1	ENSMUSG00000016028	776.798	339.408	483.942	106.296	111.127	205.075	96.4782	138.298	223.368	168.244	164.719	102.3
Fli1	ENSMUSG00000016087	36.9904	137.178	117.11	26.5739	39.0446	35.2997	38.7562	28.1719	44.3043	25.9576	47.3566	28.3153
Stard13	ENSMUSG00000016128	1967.89	1780.48	2264.71	919.291	1240.42	2015.45	1039.82	1178.1	1715.87	2523.66	1959.12	2619.62
Tenm1	ENSMUSG00000016150	736.109	354.965	21.5277	26.5739	30.0343	25.2141	8.246	28.1719	23.9982	69.2203	22.6488	13.701
Camk1g	ENSMUSG00000016179	24.0437	8.48521	136.055	9.13478	30.7851	51.2686	102.25	10.2443	47.0733	80.757	52.5041	53.8904
Diexf	ENSMUSG00000016181	671.375	436.988	384.915	283.178	282.322	387.456	351.28	389.284	462.426	432.627	319.142	315.122
Hsd11b1	ENSMUSG00000016194	0	0	0	0.830434	0	0	0.8246	3.41477	0	0	20.5898	13.701
Syt14	ENSMUSG00000016200	0	0	0	1.66087	0	0	0.8246	0	0	0	0	0
H2-M3	ENSMUSG00000016206	0	0	53.3886	3.32174	4.50514	11.7666	3.2984	5.97585	8.30706	9.61393	8.23593	0.913397
Lonrf3	ENSMUSG00000016239	9.2476	11.3136	0	2.4913	6.00685	3.36188	0.8246	5.97585	8.30706	0	15.4424	6.39378
Atp5e	ENSMUSG00000016252	7.39808	0	33.5832	148.648	45.0514	79.0041	111.321	234.766	139.374	245.155	269.727	235.656
Nelfcd	ENSMUSG00000016253	153.51	695.787	278.999	164.426	249.284	193.308	221.817	134.883	131.067	178.819	160.601	164.411
Tubb1	ENSMUSG00000016255	5.54856	0	0	0	0	0	0	0	0	0	0	0
Ctsz	ENSMUSG00000016256	25.8933	9.89941	3.44443	117.922	68.328	5.04282	43.7038	60.6122	47.9963	5.76836	27.7963	16.4411
Slmo2	ENSMUSG00000016257	14.7962	100.408	43.9164	181.035	123.891	110.102	281.189	222.814	112.607	174.012	159.571	160.758
Sertad4	ENSMUSG00000016262	135.015	207.888	5.16664	25.7435	10.512	78.1637	39.5808	53.7826	44.3043	8.65253	24.7078	31.0555
H2-M2	ENSMUSG00000016283	5.54856	4.2426	10.3333	0	0.750857	0	0	0	0.923007	1.92279	2.05898	0.913397
Ube2a	ENSMUSG00000016308	0	1.4142	2.58332	26.5739	7.50857	3.36188	28.861	14.5128	15.6911	3.84557	14.4129	27.4019
Slc25a5	ENSMUSG00000016319	86.9274	2.8284	44.7775	89.6869	87.8502	111.782	154.2	100.736	110.761	148.054	131.775	146.144
Atp1b4	ENSMUSG00000016327	1.84952	0	0	0.830434	15.0171	2.52141	4.123	6.82954	10.1531	2.88418	12.3539	12.7876
Ppdpf	ENSMUSG00000016344	160.908	80.6095	24.111	16.6087	77.3383	37.8211	46.1776	46.0994	53.5344	16.3437	26.7668	35.6225
Kcnq2	ENSMUSG00000016346	22.1942	11.3136	6.02775	0.830434	1.50171	4.20235	4.123	11.098	9.23007	4.80696	19.5603	12.7876
Eef1a2	ENSMUSG00000016349	1102.31	1230.36	1012.66	661.856	629.969	1051.43	811.406	719.663	749.481	771.998	828.74	818.404
Col20a1	ENSMUSG00000016356	110.971	5.65681	38.7498	22.4217	15.0171	26.895	13.1936	20.4886	11.0761	99.0234	26.7668	35.6225
Pls3	ENSMUSG00000016382	92.476	39.5976	176.527	219.235	165.939	139.518	147.603	225.375	252.904	99.0234	181.19	127.876
Mpped2	ENSMUSG00000016386	186.801	128.692	66.3052	151.969	57.0651	131.954	75.0386	103.297	87.6856	120.174	83.3888	77.6388
Nkap	ENSMUSG00000016409	231.19	161.219	74.0552	65.6043	63.072	71.4399	103.9	102.443	86.7626	89.4095	92.6542	84.9459
Ndufa1	ENSMUSG00000016427	0	0	0	7.47391	0	0	5.7722	4.26846	7.38405	0.961393	14.4129	0
Wt1	ENSMUSG00000016458	12.9466	255.97	68.0274	10.7956	6.00685	14.288	5.7722	38.4162	16.6141	19.2279	10.2949	18.2679
E2f3	ENSMUSG00000016477	297.773	568.509	133.472	150.309	324.37	168.094	216.87	111.834	130.144	71.143	119.421	113.261
Cr1l	ENSMUSG00000016481	70.2817	16.9704	190.305	146.987	87.0994	136.156	260.574	105.858	125.529	174.973	191.485	206.428
Ppfibp1	ENSMUSG00000016487	2213.87	1347.73	1284.77	957.491	1511.47	733.73	479.093	806.74	1046.69	454.739	466.36	420.163
Cd46	ENSMUSG00000016493	12.9466	5.65681	27.5554	19.9304	22.5257	59.6733	58.5466	17.0739	21.2292	33.6487	73.0939	51.1502
Cd34	ENSMUSG00000016494	1.84952	26.8698	11.1944	29.0652	22.5257	15.9689	34.6332	20.4886	54.4574	17.3051	40.1502	31.0555
Plgrkt	ENSMUSG00000016495	3.69904	66.4675	156.721	172.73	180.206	159.689	241.608	128.054	193.831	169.205	188.397	266.712
Cd274	ENSMUSG00000016496	9.2476	12.7278	7.74996	14.1174	18.7714	9.24517	19.7904	10.2443	12.9221	7.69114	8.23593	8.22057
Pdcd1lg2	ENSMUSG00000016498	0	0	0.861106	0	0	1.68094	0	0	0	2.88418	14.4129	2.74019
Gtf3a	ENSMUSG00000016503	3.69904	11.3136	285.887	29.8956	63.8228	31.0974	56.0728	46.9531	30.4592	28.8418	24.7078	54.8038
Mtif3	ENSMUSG00000016510	9.2476	41.0118	24.111	115.43	116.383	49.5877	128.638	59.7585	71.0715	108.637	106.038	90.4263
Lnx2	ENSMUSG00000016520	1300.21	1124.29	1274.44	588.778	908.537	616.064	352.929	636.855	636.875	314.375	329.437	296.854
Il19	ENSMUSG00000016524	0	0	0	0	18.7714	0	0	0	0.923007	0	0	0
Dyrk3	ENSMUSG00000016526	0	0	0	4.15217	5.256	1.68094	0.8246	11.098	11.0761	3.84557	4.11796	0
Mapkapk2	ENSMUSG00000016528	1548.05	646.29	799.968	574.661	744.85	453.854	521.972	678.686	539.036	733.543	867.861	823.884
Il10	ENSMUSG00000016529	0	0	0	2.4913	22.5257	0.84047	6.5968	1.70739	9.23007	1.92279	6.17695	2.74019
Lamp2	ENSMUSG00000016534	1274.32	714.172	948.078	1851.87	1750.25	1023.69	1577.46	1423.11	1598.65	1176.74	1524.68	1564.65
Atxn10	ENSMUSG00000016541	575.2	992.769	843.023	417.709	738.843	486.632	234.186	276.596	430.121	155.746	116.333	192.727
Foxred2	ENSMUSG00000016552	0	19.7988	0	1.66087	0	0	14.0182	0	7.38405	0.961393	0	2.74019
Eif3d	ENSMUSG00000016554	81.3788	141.42	109.361	104.635	105.12	70.5994	49.476	113.541	102.454	61.5291	64.8579	58.4574
NA	ENSMUSG00000016559	1061.62	185.26	39.6109	120.413	62.3211	75.6423	70.9156	70.0028	68.3025	96.1393	74.1234	112.348
Nup50	ENSMUSG00000016619	51.7865	82.0237	87.8329	124.565	150.922	181.541	256.451	90.4914	156.911	82.6798	118.391	133.356
Phf21b	ENSMUSG00000016624	730.56	1011.15	66.3052	29.0652	118.635	69.759	6.5968	89.6377	57.2264	71.143	21.6193	73.9852
Nlrp14	ENSMUSG00000016626	0	1.4142	0	0.830434	0	0	0	0.853693	0	0	0	0.913397
Ift27	ENSMUSG00000016637	0	19.7988	14.6388	4.15217	9.01028	45.3854	1.6492	1.70739	21.2292	6.72975	11.3244	10.0474
Pacsin2	ENSMUSG00000016664	3488.19	2508.79	1525.02	1346.13	1832.09	2249.94	2159.63	1606.65	1837.71	2512.12	1721.31	1473.31
Cmah	ENSMUSG00000016756	88.7769	52.3254	4.30553	28.2348	19.5223	26.895	18.9658	10.2443	34.1512	18.2665	27.7963	30.1421
Ttll12	ENSMUSG00000016757	29.5923	55.1539	24.9721	98.8217	90.1028	63.8757	9.8952	42.6846	25.8442	15.3823	24.7078	6.39378
Bik	ENSMUSG00000016758	1.84952	16.9704	29.2776	8.30434	31.536	15.1285	32.984	12.8054	23.9982	18.2665	24.7078	19.1813
Scube1	ENSMUSG00000016763	1.84952	0	4.30553	6.64348	1.50171	3.36188	32.1594	90.4914	3.69203	16.3437	3.08847	13.701
Tox4	ENSMUSG00000016831	353.258	329.509	168.777	298.126	289.08	259.705	376.842	260.376	230.752	259.576	420.032	356.225
Mrps18c	ENSMUSG00000016833	3.69904	0	18.9443	14.1174	4.50514	8.4047	15.6674	5.12216	19.3831	9.61393	26.7668	10.9608
Sulf1	ENSMUSG00000016918	24.0437	173.947	60.2775	65.6043	25.5291	96.654	94.829	82.8082	197.523	38.4557	77.2118	67.5914
Srsf6	ENSMUSG00000016921	3269.95	2752.04	2943.26	1142.68	1351.54	2352.47	2815.18	1591.28	1143.61	1334.41	1117	1182.85
Plcg1	ENSMUSG00000016933	1100.46	1281.27	1401.88	766.491	717.068	984.19	902.112	806.74	914.7	1173.86	988.312	875.034
Kctd2	ENSMUSG00000016940	0	207.888	31.8609	76.4	84.8468	80.6851	38.7562	136.591	107.069	98.062	66.9169	63.9378
Tmprss6	ENSMUSG00000016942	1.84952	2.8284	0.861106	7.47391	0	2.52141	4.123	0	1.84601	12.4981	2.05898	0
Kctd5	ENSMUSG00000016946	12.9466	86.2663	24.9721	19.9304	29.2834	24.3736	23.9134	30.7329	45.2273	24.9962	18.5308	21.9215
Pom121l2	ENSMUSG00000016982	0	0	0	0	0	0	0	0	0	0	0	0
Etaa1	ENSMUSG00000016984	0	14.142	2.58332	29.0652	39.7954	8.4047	13.1936	29.8792	60.9184	25.9576	19.5603	60.2842
Matn4	ENSMUSG00000016995	0	11.3136	1.72221	15.7783	10.512	0.84047	1.6492	5.12216	0	0.961393	0	0
Svs4	ENSMUSG00000016998	0	0	0	0	0	0	0	0	0	0	0	0
Svs6	ENSMUSG00000017000	0	0	0	0	0	0	0	0	0	0	0	0
Slpi	ENSMUSG00000017002	0	0	0	0	0	0	0	0	0	0	0	0
Svs3a	ENSMUSG00000017003	0	0	0	0	0	0	0	0	0	0	0	0
Svs5	ENSMUSG00000017004	0	0	0	0	0	0	0	0	0	0	0	0
Rbpjl	ENSMUSG00000017007	0	15.5562	0	0	0	0	0	0	2.76902	0	1.02949	0
Sdc4	ENSMUSG00000017009	14.7962	98.9941	93.8606	71.4174	123.891	152.125	96.4782	42.6846	69.2255	53.838	29.8552	42.9297
Ccdc70	ENSMUSG00000017049	0	0	0	0	0	0	0	0	0	0	0	0
Il13ra1	ENSMUSG00000017057	5.54856	67.8817	35.3054	64.7739	93.8571	152.965	183.061	75.125	154.142	88.4481	83.3888	147.057
Prl5a1	ENSMUSG00000017064	0	0	0	0	0	0	0	0	0	0	0	0
Nbr1	ENSMUSG00000017119	1213.28	1315.21	649.274	739.087	828.946	816.936	712.454	789.666	746.712	787.38	840.065	899.696
Cyth1	ENSMUSG00000017132	1205.89	1482.08	1041.08	619.504	621.709	871.567	869.953	903.207	801.17	1115.22	758.735	714.277
Rnd3	ENSMUSG00000017144	238.588	188.089	160.166	399.439	452.767	395.021	595.361	443.067	432.89	336.487	318.113	420.163
Brca1	ENSMUSG00000017146	0	35.355	6.02775	38.2	6.75771	19.3308	9.0706	3.41477	29.5362	2.88418	2.05898	1.82679
Gast	ENSMUSG00000017165	0	0	0	0	0	0	0	0	0	0	0	0
Cntnap1	ENSMUSG00000017167	114.67	145.663	102.472	54.8087	111.127	139.518	64.3188	87.9304	92.3007	265.344	158.542	210.995
Nt5c3b	ENSMUSG00000017176	75.8303	120.207	232.499	94.6695	178.704	114.304	155.025	139.152	89.5316	95.1779	115.303	125.135
Coa3	ENSMUSG00000017188	0	0	1.72221	14.1174	6.75771	1.68094	4.9476	17.9275	6.46105	4.80696	6.17695	3.65359
Zpbp2	ENSMUSG00000017195	0	0	0	0	0	0	0	0	0	0	0	1.82679
Gsdma	ENSMUSG00000017204	1.84952	1.4142	0.861106	12.4565	0.750857	1.68094	0	1.70739	5.53804	0.961393	3.08847	0.913397
Med24	ENSMUSG00000017210	2082.56	1163.89	712.135	467.535	753.86	739.613	491.462	554.047	463.349	646.056	512.687	468.573
Gsdma2	ENSMUSG00000017211	0	0	0	0	0.750857	0	0	0.853693	0	0.961393	0	0
Psmd3	ENSMUSG00000017221	1623.88	1190.76	538.192	439.3	472.289	395.021	380.965	544.656	490.117	583.565	268.697	390.021
Exosc10	ENSMUSG00000017264	869.274	1111.56	869.718	670.161	729.833	627.831	649.785	683.808	655.335	810.454	666.081	685.961
Glod4	ENSMUSG00000017286	31.4418	12.7278	6.88885	6.64348	33.0377	21.0117	61.0204	17.0739	33.2282	8.65253	26.7668	29.2287
Vps53	ENSMUSG00000017288	194.2	742.456	543.358	449.265	522.596	326.943	281.189	417.456	358.127	370.136	327.378	255.751
Taok1	ENSMUSG00000017291	995.041	995.598	1257.22	1667.51	1746.49	1167.41	1418.31	1781.66	1627.26	1188.28	1534.97	1561.91
Dnttip1	ENSMUSG00000017299	92.476	193.746	230.777	194.322	186.212	152.125	277.89	144.274	152.296	164.398	138.981	169.892
Tnnc2	ENSMUSG00000017300	0	0	0	0	0	0	0	0	0	0	0	0
Acot8	ENSMUSG00000017307	212.695	55.1539	24.111	44.8435	14.2663	80.6851	98.1274	33.294	30.4592	83.6412	36.0322	69.4182
Cd300lg	ENSMUSG00000017309	0	1.4142	8.61106	6.64348	1.50171	16.8094	22.2642	24.7571	5.53804	26.919	36.0322	19.1813
Spint4	ENSMUSG00000017310	0	0	0	0	0	0	0	0	0	0	0	0
Pyy	ENSMUSG00000017311	0	0	0	0	0	0	0	0	0	0	0	0
Mpp2	ENSMUSG00000017314	31.4418	1.4142	2.58332	24.0826	4.50514	25.2141	2.4738	17.9275	13.8451	6.72975	4.11796	1.82679
Ppy	ENSMUSG00000017316	0	1.4142	0	0	0	0	0	0.853693	0	0	1.02949	0
Vtn	ENSMUSG00000017344	0	0	0	0.830434	1.50171	2.52141	2.4738	0	2.76902	11.5367	0	5.48038
Nlk	ENSMUSG00000017376	349.559	462.444	545.08	1068.77	938.571	574.041	870.778	838.326	830.706	788.342	471.507	694.182
Traf4	ENSMUSG00000017386	3.69904	28.284	120.555	8.30434	48.0548	47.0663	37.107	46.9531	19.3831	63.4519	124.568	64.8512
Aldoc	ENSMUSG00000017390	0	35.355	0	0	0	0	0	0	0	0	0	0
Stac2	ENSMUSG00000017400	16.6457	83.4379	0	2.4913	0	0	0	13.6591	0.923007	0	0	0
Rpl19	ENSMUSG00000017404	9.2476	56.5681	12.0555	99.6521	67.5771	22.6927	22.2642	70.0028	89.5316	59.6063	107.067	68.5048
Nek8	ENSMUSG00000017405	249.685	354.965	153.277	85.5347	168.943	136.156	113.795	81.9545	86.7626	48.0696	66.9169	53.8904
Cacnb4	ENSMUSG00000017412	0	2.8284	1.72221	23.2522	3.00343	35.2997	9.0706	14.5128	3.69203	4.80696	35.0027	33.7957
Plxdc1	ENSMUSG00000017417	0	1.4142	0.861106	6.64348	0.750857	0	0	8.53693	2.76902	17.3051	18.5308	13.701
Arl5b	ENSMUSG00000017418	20.3447	305.467	108.499	118.752	50.3074	92.4517	271.293	123.785	73.8405	59.6063	172.955	164.411
Zfp207	ENSMUSG00000017421	1176.29	2329.19	2324.13	3139.04	3994.56	2450.81	3213.47	2910.24	3551.73	2370.79	2589.17	2862.59
Psmd11	ENSMUSG00000017428	797.143	296.982	607.941	894.378	741.847	638.757	1005.19	770.031	846.397	517.229	671.228	724.324
C1qtnf1	ENSMUSG00000017446	5.54856	4.2426	4.30553	5.81304	1.50171	5.88329	2.4738	7.68323	2.76902	8.65253	8.23593	5.48038
Pipox	ENSMUSG00000017453	0	0	9.47217	0.830434	5.256	0	0	8.53693	3.69203	0	1.02949	0.913397
Timp2	ENSMUSG00000017466	51.7865	15.5562	96.4439	105.465	42.048	68.9185	89.8814	81.1008	48.9194	90.3709	166.778	80.3789
Zc3h18	ENSMUSG00000017478	5670.63	2952.85	1477.66	785.591	1022.67	861.481	556.605	1030.41	887.009	1165.21	688.73	599.188
Top2b	ENSMUSG00000017485	1548.05	561.438	248.86	606.217	679.525	486.632	484.865	606.976	670.103	469.16	407.679	495.975
Rarb	ENSMUSG00000017491	911.813	335.166	1824.68	294.804	479.047	416.873	649.785	493.434	452.273	460.507	424.15	471.313
Igfbp4	ENSMUSG00000017493	147.962	169.704	52.5275	18.2696	72.8331	40.3425	77.5124	23.9034	39.6893	19.2279	63.8285	29.2287
Cdc6	ENSMUSG00000017499	1.84952	0	0	0	2.25257	0	0	3.41477	0.923007	0	5.14746	3.65359
Suz12	ENSMUSG00000017548	162.758	124.45	246.276	174.391	256.793	136.156	206.15	275.743	278.748	253.808	248.107	312.382
Atad5	ENSMUSG00000017550	556.705	261.627	174.805	233.352	302.595	203.394	172.341	164.763	225.214	137.479	127.657	233.83
Crlf3	ENSMUSG00000017561	59.1846	42.426	160.166	93.0087	114.881	46.2258	153.376	85.3693	114.453	93.2551	91.6247	90.4263
Krt27	ENSMUSG00000017588	0	0	0	0.830434	2.25257	0	0	1.70739	0	0	0	0
Tns4	ENSMUSG00000017607	3.69904	5.65681	5.16664	4.98261	2.25257	0.84047	2.4738	3.41477	6.46105	8.65253	7.20644	11.8742
Tnfaip1	ENSMUSG00000017615	142.413	138.592	82.6662	178.543	175.7	259.705	207.799	135.737	210.446	149.016	131.775	84.0325
Abr	ENSMUSG00000017631	456.831	683.059	316.026	167.748	144.165	277.355	124.515	157.933	253.827	225.927	163.689	210.081
Rab11fip4	ENSMUSG00000017639	0	1.4142	1.72221	6.64348	10.512	1.68094	1.6492	9.39062	4.61503	10.5753	0	1.82679
Cd40	ENSMUSG00000017652	7.39808	8.48521	9.47217	1.66087	5.256	30.2569	13.1936	7.68323	5.53804	10.5753	14.4129	14.6144
Slc35c2	ENSMUSG00000017664	31.4418	100.408	49.0831	44.8435	91.6045	124.389	26.3872	100.736	60.9184	54.7994	18.5308	55.7172
Zfp334	ENSMUSG00000017667	160.908	202.231	61.9997	83.0434	65.3245	29.4164	35.4578	73.4176	86.7626	14.4209	70.0054	60.2842
Elmo2	ENSMUSG00000017670	466.079	115.965	86.1106	135.361	94.608	93.2921	70.091	81.1008	131.99	66.3361	49.4156	94.0799
Wsb1	ENSMUSG00000017677	277.428	106.065	299.665	285.669	433.244	147.082	79.9862	219.399	325.821	39.4171	64.8579	58.4574
Ttpal	ENSMUSG00000017679	107.272	159.805	424.525	174.391	202.731	152.965	411.475	179.275	169.833	217.275	278.992	197.294
Rhot1	ENSMUSG00000017686	1847.67	947.515	1915.96	1735.61	1600.83	1393.5	2525.75	1742.39	1513.73	1891.06	1545.27	1331.73
Hnf4g	ENSMUSG00000017688	12.9466	1.4142	0.861106	0.830434	0	0	0	0.853693	0.923007	0	0	0.913397
Rhbdl3	ENSMUSG00000017692	125.767	26.8698	102.472	19.9304	28.5326	211.798	105.549	75.9787	106.146	39.4171	73.0939	31.9689
Ada	ENSMUSG00000017697	14.7962	48.0828	116.249	183.526	122.39	225.246	71.7402	113.541	162.449	184.587	268.697	249.357
Serinc3	ENSMUSG00000017707	99.874	168.29	180.832	309.752	281.571	342.912	460.127	295.378	350.743	237.464	403.561	388.194
Tha1	ENSMUSG00000017713	27.7428	7.07101	39.6109	45.6739	37.5428	15.1285	8.246	61.4659	73.8405	18.2665	48.3861	32.8823
Pgs1	ENSMUSG00000017715	68.4322	161.219	106.777	127.887	204.984	200.872	166.569	214.277	149.527	135.556	101.92	129.702
Birc5	ENSMUSG00000017716	14.7962	31.1124	24.111	4.15217	1.50171	21.0117	14.8428	17.9275	26.7672	6.72975	8.23593	7.30718
Afmid	ENSMUSG00000017718	90.6264	118.793	74.9163	26.5739	26.28	50.4282	38.7562	55.49	18.4601	17.3051	41.1796	18.2679
Trp53tg5	ENSMUSG00000017720	7.39808	18.3846	16.361	2.4913	6.00685	13.4475	3.2984	0.853693	0.923007	0.961393	14.4129	0.913397
Pigt	ENSMUSG00000017721	196.049	412.947	880.051	152.8	175.7	130.273	271.293	138.298	252.904	157.668	157.512	138.836
Wfdc2	ENSMUSG00000017723	0	0	0	0	0	0	0	0	0	0	0	0
Etv4	ENSMUSG00000017724	0	46.6686	7.74996	4.98261	3.00343	45.3854	4.123	1.70739	14.7681	0	0	3.65359
Eppin	ENSMUSG00000017733	0	0	0	0	0	0	0	0	0	0	0	0
Dbndd2	ENSMUSG00000017734	0	16.9704	43.9164	19.9304	20.2731	87.4088	22.2642	17.0739	31.3822	16.3437	27.7963	42.9297
Mmp9	ENSMUSG00000017737	0	0	0.861106	0	1.50171	0	0	0	0	0	1.02949	2.74019
Slc12a5	ENSMUSG00000017740	68.4322	65.0533	254.888	19.9304	30.0343	137.837	51.1252	26.4645	30.4592	45.1854	28.8258	75.812
Ghdc	ENSMUSG00000017747	147.962	148.491	74.0552	67.2652	110.376	67.2376	59.3712	67.4417	42.4583	110.56	50.4451	46.5833
Pltp	ENSMUSG00000017754	0	103.237	0	10.7956	7.50857	14.288	42.0546	3.41477	10.1531	0.961393	4.11796	21.9215
Slc12a7	ENSMUSG00000017756	15018.1	6933.83	4426.09	2628.32	3782.07	3200.51	2341.04	4205.29	2822.55	2391.94	1600.86	1349.09
Ctsa	ENSMUSG00000017760	1488.86	1170.96	940.328	1199.98	1301.99	721.123	758.632	1402.62	1055.92	767.191	883.303	843.066
Zswim1	ENSMUSG00000017764	1.84952	11.3136	99.8884	30.7261	17.2697	37.8211	28.861	22.196	35.9973	100.946	44.2681	68.5048
Slc12a4	ENSMUSG00000017765	1625.73	882.462	1596.49	1073.75	1422.12	1385.09	706.682	1018.46	1100.22	478.773	612.547	434.777
Spata25	ENSMUSG00000017767	0	0	7.74996	17.4391	3.00343	15.1285	13.1936	6.82954	13.8451	26.919	37.0617	42.0163
Myo1c	ENSMUSG00000017774	2554.19	1803.11	3454.76	1116.93	1317	1107.74	510.427	711.98	962.696	528.766	430.327	345.264
Crk	ENSMUSG00000017776	5.54856	41.0118	135.194	244.148	184.711	242.055	489.812	274.035	278.748	249.001	333.555	316.035
Cox7c	ENSMUSG00000017778	14.7962	49.497	130.027	220.065	158.431	305.931	265.521	147.689	154.142	217.275	379.882	289.547
Pitpna	ENSMUSG00000017781	201.598	132.935	223.888	223.387	187.714	399.223	199.553	203.179	189.216	267.267	188.397	188.16
Mlx	ENSMUSG00000017801	20.3447	124.45	123.138	48.9956	43.5497	29.4164	96.4782	74.2713	14.7681	81.7184	58.681	69.4182
Fam134c	ENSMUSG00000017802	5.54856	70.7101	164.471	95.5	129.898	82.366	482.391	102.443	98.7617	109.599	99.8606	112.348
Jph2	ENSMUSG00000017817	7666.26	5174.56	3352.29	3339.18	3264.73	2699.59	2068.1	4314.56	3335.75	6187.52	4596.68	4396.18
Dhx58	ENSMUSG00000017830	5.54856	4.2426	1.72221	4.15217	0.750857	7.56423	3.2984	5.12216	5.53804	10.5753	16.4719	4.56699
Rab5a	ENSMUSG00000017831	129.466	36.7692	10.3333	46.5043	51.0583	16.8094	18.9658	109.273	34.1512	23.0734	29.8552	34.7091
Hspb9	ENSMUSG00000017832	0	0	0	0	3.00343	2.52141	0	0	6.46105	0.961393	2.05898	0
Nkiras2	ENSMUSG00000017837	25.8933	100.408	153.277	34.0478	36.0411	36.1402	47.8268	35.0014	68.3025	85.5639	68.9759	38.3627
Ppp2r5c	ENSMUSG00000017843	109.122	333.752	761.218	245.809	346.145	278.195	441.161	344.892	331.359	239.387	375.764	299.594
Ift52	ENSMUSG00000017858	184.952	168.29	229.915	100.483	108.123	39.5021	117.093	61.4659	69.2255	47.1082	66.9169	70.3316
Mybl2	ENSMUSG00000017861	42.5389	46.6686	1.72221	9.13478	1.50171	60.5138	0.8246	12.8054	19.3831	0	0	3.65359
Sgk2	ENSMUSG00000017868	0	1.4142	0	1.66087	1.50171	0	0	0	11.0761	0	1.02949	4.56699
Eya2	ENSMUSG00000017897	0	8.48521	44.7775	23.2522	3.00343	1.68094	10.7198	0	2.76902	23.0734	14.4129	1.82679
Prl3c1	ENSMUSG00000017922	0	0	0	1.66087	1.50171	1.68094	0	0	3.69203	0.961393	2.05898	1.82679
B4galt5	ENSMUSG00000017929	406.894	520.426	842.162	448.435	714.816	205.075	148.428	225.375	400.585	152.861	85.4478	66.678
Gdap1l1	ENSMUSG00000017943	0	0	3.44443	4.98261	1.50171	1.68094	1.6492	1.70739	4.61503	2.88418	6.17695	0
Hnf4a	ENSMUSG00000017950	0	0	0	0	0	0.84047	0	0	0	0.961393	2.05898	1.82679
Ptgis	ENSMUSG00000017969	0	66.4675	9.47217	9.13478	15.768	34.4593	10.7198	30.7329	23.9982	3.84557	4.11796	3.65359
Cadps2	ENSMUSG00000017978	7.39808	5.65681	0	0	1.50171	9.24517	0	0.853693	6.46105	0	2.05898	25.5751
Ddx27	ENSMUSG00000017999	1283.57	1064.89	315.165	182.696	259.046	361.402	140.182	262.937	195.677	351.87	148.247	147.97
Cyth3	ENSMUSG00000018001	125.767	444.059	620.858	333.004	429.49	648.843	267.995	380.747	335.974	227.85	312.965	243.877
Cyth4	ENSMUSG00000018008	20.3447	26.8698	6.88885	49.8261	115.632	5.88329	9.0706	28.1719	60.9184	29.8032	31.9142	11.8742
Rac3	ENSMUSG00000018012	0	5.65681	0	4.15217	3.00343	0	0.8246	0.853693	4.61503	4.80696	16.4719	5.48038
Rrp7a	ENSMUSG00000018040	649.181	161.219	80.944	117.091	126.895	175.658	114.619	145.981	107.992	149.016	103.979	86.7727
Cyb5r3	ENSMUSG00000018042	1241.03	695.787	201.499	191.83	109.625	79.0041	124.515	112.687	101.531	19.2279	61.7695	27.4019
Ints2	ENSMUSG00000018068	275.578	226.272	261.776	233.352	168.192	310.974	324.892	169.885	211.369	174.012	192.515	224.696
Med13l	ENSMUSG00000018076	1675.66	1552.79	1633.52	727.461	690.037	1063.19	1042.29	824.667	701.485	795.072	711.378	737.111
NA	ENSMUSG00000018102	0	1.4142	0	32.3869	4.50514	0.84047	32.984	17.9275	6.46105	24.0348	23.6783	3.65359
Baiap2l2	ENSMUSG00000018126	0	0	0	0	0	0	0	0	0.923007	1.92279	0	0.913397
Mafk	ENSMUSG00000018143	967.299	452.544	191.166	301.448	335.633	242.055	61.0204	280.865	263.057	140.363	191.485	129.702
Med1	ENSMUSG00000018160	1289.11	1714.01	1223.63	3114.96	1299.73	2044.02	2122.52	1574.21	1737.1	2169.86	1934.41	1881.6
Erbb3	ENSMUSG00000018166	166.457	142.834	71.4718	227.539	238.772	127.751	314.997	233.912	155.065	124.981	159.571	196.38
Stard3	ENSMUSG00000018167	356.957	473.757	139.499	171.069	153.175	331.145	118.742	110.98	183.678	186.51	163.689	140.663
Ikzf3	ENSMUSG00000018168	7.39808	7.07101	0.861106	5.81304	0	0	0.8246	0.853693	1.84601	0	6.17695	4.56699
Mfng	ENSMUSG00000018169	0	0	0	5.81304	0	15.9689	9.0706	14.5128	11.0761	0.961393	11.3244	0.913397
Vmp1	ENSMUSG00000018171	516.016	483.657	805.135	628.639	539.115	364.764	329.84	342.331	286.132	132.672	111.185	179.026
Uchl5	ENSMUSG00000018189	36.9904	50.9112	104.194	73.9087	51.0583	21.8522	47.8268	48.6605	47.9963	43.2627	61.7695	42.9297
Glrx2	ENSMUSG00000018196	62.8837	41.0118	153.277	142.004	95.3588	100.856	483.216	128.908	93.2237	85.5639	270.756	174.459
Trove2	ENSMUSG00000018199	31.4418	38.1834	125.722	198.474	255.291	173.977	237.485	110.98	111.684	61.5291	146.188	105.954
Stk4	ENSMUSG00000018209	123.918	172.533	185.999	191.83	133.653	162.211	106.373	159.641	141.22	101.908	106.038	166.238
Wfdc15b	ENSMUSG00000018211	0	0	0	0	0	0	0	0	0	0	0	0
Pmp22	ENSMUSG00000018217	0	117.379	82.6662	112.109	68.328	88.2493	41.23	61.4659	93.2237	52.8766	74.1234	95.9067
Gdf9	ENSMUSG00000018238	0	0	1.72221	0.830434	0	1.68094	0	1.70739	1.84601	0	0	0
Zcchc10	ENSMUSG00000018239	96.175	271.527	43.0553	118.752	131.4	47.0663	32.984	116.102	70.1485	98.062	70.0054	77.6388
Prl8a2	ENSMUSG00000018259	0	0	0	0	0	0	0	0	0	0	0	0
Tbx5	ENSMUSG00000018263	1396.39	1059.24	622.58	371.204	636.727	572.36	643.188	583.926	644.259	541.264	503.421	581.834
Psmb6	ENSMUSG00000018286	31.4418	29.6982	72.3329	77.2304	58.5668	57.1519	140.182	116.102	63.6875	58.6449	40.1502	56.6306
Spag7	ENSMUSG00000018287	20.3447	43.8402	31.8609	109.617	100.615	63.8757	60.1958	81.1008	62.7644	86.5253	61.7695	65.7646
Pfn1	ENSMUSG00000018293	344.011	448.302	382.331	307.261	167.441	317.698	336.437	172.446	223.368	289.379	341.791	367.186
Tomm34	ENSMUSG00000018322	177.554	148.491	493.414	180.204	192.97	98.3349	47.0022	120.371	132.913	101.908	157.512	166.238
Ywhab	ENSMUSG00000018326	162.758	69.2959	229.915	112.939	171.195	142.039	205.325	150.25	141.22	91.3323	118.391	136.096
Ksr1	ENSMUSG00000018334	316.268	755.183	223.027	99.6521	72.0823	93.2921	23.9134	23.0497	111.684	27.8804	84.4183	17.3545
Gpx3	ENSMUSG00000018339	1400.09	997.012	849.051	606.217	521.846	445.449	315.822	484.044	364.588	174.012	232.665	272.192
Anxa6	ENSMUSG00000018340	821.187	627.905	857.662	644.417	1110.52	793.403	587.115	627.464	992.232	610.484	509.598	605.582
Il12rb2	ENSMUSG00000018341	7.39808	25.4556	112.805	86.3652	60.0685	107.58	89.8814	41.8309	67.3795	109.599	177.072	158.018
Zkscan6	ENSMUSG00000018347	125.767	43.8402	78.3607	161.104	161.434	131.954	98.1274	218.545	119.068	194.201	128.686	94.0799
Kpna2	ENSMUSG00000018362	164.607	169.704	743.996	582.965	436.248	500.92	764.404	777.714	674.718	544.148	779.325	670.433
Smurf2	ENSMUSG00000018363	1098.61	237.586	885.217	800.539	700.549	577.403	963.133	731.615	700.562	611.446	626.96	622.023
Cep95	ENSMUSG00000018372	1283.57	991.355	614.83	934.239	879.253	899.302	787.493	1253.22	886.086	1535.34	1216.86	1283.32
Vezf1	ENSMUSG00000018377	1133.76	997.012	881.773	785.591	843.963	778.275	972.203	775.153	725.483	832.566	754.617	759.033
NA	ENSMUSG00000018378	6776.64	6103.69	5780.61	1159.29	1473.93	2009.56	768.527	1447.86	1508.19	2114.1	1058.32	1169.15
Srsf1	ENSMUSG00000018379	299.622	346.479	656.163	1066.28	955.09	1390.14	2142.31	1252.37	1113.15	984.466	1322.9	1239.48
Abi3	ENSMUSG00000018381	68.4322	18.3846	13.7777	22.4217	6.75771	25.2141	21.4396	17.0739	11.0761	31.726	44.2681	11.8742
Shroom1	ENSMUSG00000018387	1.84952	15.5562	11.1944	1.66087	0	2.52141	9.0706	1.70739	10.1531	22.112	30.8847	13.701
Kif3a	ENSMUSG00000018395	3521.48	1606.53	774.996	1009.81	1129.29	416.032	405.703	1021.02	968.234	808.531	621.813	642.118
39692	ENSMUSG00000018398	5359.91	5225.47	1996.04	914.308	1480.69	1433	494.76	759.787	1139.91	800.84	626.96	558.086
Mtmr4	ENSMUSG00000018401	258.933	240.414	413.331	249.13	198.226	273.153	195.43	206.594	137.528	176.896	246.048	195.467
Mrm1	ENSMUSG00000018405	12.9466	4.2426	41.3331	69.7565	54.8125	100.016	144.305	71.7102	76.6095	140.363	78.2413	61.1976
Mapt	ENSMUSG00000018411	5280.38	3420.95	2322.4	1439.14	1810.32	950.571	963.957	1308.71	1533.11	1524.77	1074.79	1149.05
Kansl1	ENSMUSG00000018412	1888.36	1732.4	2146.74	2145.84	2154.96	1582.6	1443.05	2166.67	2203.22	1972.78	2021.92	1836.84
Gid4	ENSMUSG00000018415	208.996	233.343	251.443	94.6695	96.1097	51.2686	142.656	121.224	84.9166	100.946	123.539	89.5129
Myo1b	ENSMUSG00000018417	22.1942	111.722	124.86	58.1304	39.0446	119.347	148.428	188.666	119.068	112.483	113.244	95.9067
Dhx40	ENSMUSG00000018425	48.0875	77.7811	21.5277	58.1304	102.867	36.9807	10.7198	73.4176	95.9927	41.3399	84.4183	90.4263
Ypel2	ENSMUSG00000018427	44.3885	124.45	110.222	220.065	138.158	240.374	279.539	256.962	215.984	398.017	556.955	443.911
Akap1	ENSMUSG00000018428	811.939	899.432	464.998	495.769	473.04	578.243	716.577	794.788	607.338	904.67	843.153	748.072
Nol11	ENSMUSG00000018433	0	18.3846	56.833	138.683	181.707	71.4399	257.275	175.007	112.607	118.251	214.134	175.372
Derl2	ENSMUSG00000018442	22.1942	86.2663	148.971	166.087	93.1062	111.782	288.61	140.006	98.7617	165.36	210.016	205.514
C1qbp	ENSMUSG00000018446	177.554	193.746	104.194	88.026	128.397	110.942	124.515	70.0028	52.6114	78.8342	67.9464	89.5129
Rpain	ENSMUSG00000018449	159.059	60.8107	57.6941	136.191	90.1028	73.1209	88.2322	66.588	46.1503	47.1082	45.2976	43.8431
NA	ENSMUSG00000018451	0	55.1539	66.3052	0	0	0	0	2.56108	0	0	5.14746	32.8823
Slc13a3	ENSMUSG00000018459	0	0	0	0.830434	0	0	0	0	0.923007	2.88418	0	3.65359
Kcnab3	ENSMUSG00000018470	29.5923	16.9704	2.58332	7.47391	3.75428	8.4047	3.2984	2.56108	4.61503	12.4981	6.17695	7.30718
Chd3	ENSMUSG00000018474	477.176	337.994	371.137	58.1304	96.1097	91.6112	7.4214	74.2713	176.294	199.008	70.0054	90.4263
Kdm6b	ENSMUSG00000018476	9537.97	6660.89	2638.43	1435.82	1727.72	1380.89	1092.6	1391.52	1673.41	1831.45	1740.87	1389.28
1700125H20Rik	ENSMUSG00000018479	0	0	0	0	0	0	0	0	0	0	2.05898	8.22057
Appbp2	ENSMUSG00000018481	297.773	436.988	410.748	422.691	452.016	537.06	692.664	410.626	315.668	413.399	431.357	432.95
Wnt9b	ENSMUSG00000018486	0	0	0	0	0	0	0.8246	4.26846	0	2.88418	5.14746	0.913397
Adora2b	ENSMUSG00000018500	0	0	8.61106	0	0	0	11.5444	0	0	0	9.26542	1.82679
Ncor1	ENSMUSG00000018501	7224.22	6024.5	4135.89	3558.41	4992.45	3594.69	3738.74	3810.03	3810.17	3892.68	3537.33	3642.63
Trpv2	ENSMUSG00000018507	5.54856	5.65681	1.72221	2.4913	19.5223	15.1285	2.4738	11.9517	8.30706	2.88418	8.23593	5.48038
Cenpv	ENSMUSG00000018509	0	60.8107	10.3333	63.113	59.3177	49.5877	63.4942	24.7571	31.3822	53.838	77.2118	52.977
Pcgf2	ENSMUSG00000018537	3110.89	3057.5	852.495	328.852	310.855	869.046	199.553	189.52	275.979	332.642	325.319	277.673
Cwc25	ENSMUSG00000018541	188.651	138.592	95.5828	203.456	141.912	82.366	161.622	136.591	167.064	167.282	136.922	167.152
1700001P01Rik	ENSMUSG00000018543	0	0	18.9443	2.4913	0.750857	4.20235	18.9658	0	0.923007	8.65253	8.23593	2.74019
Pip4k2b	ENSMUSG00000018547	229.34	466.686	267.804	70.5869	163.687	151.285	123.69	119.517	178.14	104.792	125.598	136.096
Trim37	ENSMUSG00000018548	301.472	254.556	296.221	171.9	165.189	237.012	79.9862	184.398	166.141	128.827	114.274	122.395
Ybx2	ENSMUSG00000018554	88.7769	206.473	246.276	247.469	273.312	397.542	451.056	310.744	346.127	1139.25	639.314	684.134
Ctdnep1	ENSMUSG00000018559	305.171	36.7692	123.138	161.104	107.373	173.137	142.656	203.179	163.372	143.247	131.775	127.876
Elp5	ENSMUSG00000018565	75.8303	182.432	12.0555	31.5565	37.5428	96.654	136.059	91.3451	55.3804	52.8766	58.681	65.7646
Slc2a4	ENSMUSG00000018566	1276.17	779.225	1084.13	888.565	643.484	1412.83	1971.62	1061.14	899.008	1419.98	1672.92	1830.45
Gabarap	ENSMUSG00000018567	9.2476	19.7988	20.6666	97.9913	14.2663	35.2997	150.902	45.2457	34.1512	28.8418	109.126	79.4655
Cldn7	ENSMUSG00000018569	0	0	0	1.66087	6.00685	0	1.6492	0.853693	0.923007	0.961393	1.02949	2.74019
2810408A11Rik	ENSMUSG00000018570	1.84952	0	0	0	3.00343	0	0.8246	3.41477	8.30706	2.88418	6.17695	7.30718
Phf23	ENSMUSG00000018572	105.423	374.763	176.527	82.213	95.3588	53.7901	56.8974	112.687	116.299	122.097	88.5362	58.4574
Acadvl	ENSMUSG00000018574	453.132	183.846	171.36	294.804	240.274	283.238	464.25	379.04	262.134	311.491	331.496	408.288
Dnah11	ENSMUSG00000018581	7.39808	2.8284	1.72221	0	0	1.68094	4.9476	0	0.923007	11.5367	0	3.65359
G3bp1	ENSMUSG00000018583	323.666	253.142	302.248	299.787	236.52	308.452	507.129	352.575	276.902	218.236	350.027	292.287
Atox1	ENSMUSG00000018585	14.7962	7.07101	0	20.7609	2.25257	6.72376	2.4738	1.70739	10.1531	11.5367	7.20644	0
Glra2	ENSMUSG00000018589	1.84952	0	0.861106	0.830434	0	0	0	0.853693	1.84601	0	0	0.913397
Sparc	ENSMUSG00000018593	90.6264	654.775	179.971	577.152	370.172	281.557	458.478	292.817	370.126	205.738	219.282	147.97
Glra4	ENSMUSG00000018595	0	0	10.3333	8.30434	18.7714	19.3308	103.075	5.97585	11.0761	31.726	17.5014	20.0947
Mief2	ENSMUSG00000018599	519.715	808.923	273.832	328.022	259.046	211.798	169.868	476.361	331.359	206.699	173.984	231.089
Tbx3	ENSMUSG00000018604	75.8303	36.7692	86.1106	30.7261	86.3485	79.0041	67.6172	25.6108	73.8405	47.1082	60.74	70.3316
Mmp20	ENSMUSG00000018620	0	0	0	0	0	0	0.8246	0	0	0	0	0
Mmp7	ENSMUSG00000018623	0	0	0	0	0	0	0	0	0	0	0	0
Crhr1	ENSMUSG00000018634	0	0	0	0	0	0	0	0	0	0	0	0
Dusp14	ENSMUSG00000018648	0	7.07101	0	0	0	15.1285	0.8246	0	0	0	0	2.74019
Tada2a	ENSMUSG00000018651	11.0971	28.284	119.694	210.1	174.95	97.4945	225.116	232.204	216.907	153.823	121.48	187.246
Ikzf1	ENSMUSG00000018654	0	1.4142	1.72221	2.4913	1.50171	20.1713	2.4738	2.56108	3.69203	0	2.05898	0
Fam115e	ENSMUSG00000018656	16.6457	0	0.861106	0.830434	0	0	0	0	0	0.961393	0	0
Pnpo	ENSMUSG00000018659	9.2476	18.3846	132.61	22.4217	6.00685	40.3425	29.6856	28.1719	23.0752	17.3051	67.9464	36.5359
Cog1	ENSMUSG00000018661	691.72	728.314	338.415	300.617	298.841	373.168	256.451	283.426	239.059	311.491	250.166	352.571
Cbx1	ENSMUSG00000018666	268.18	161.219	224.749	267.4	270.308	322.74	220.168	265.498	236.29	386.48	272.815	200.034
Cdk5rap3	ENSMUSG00000018669	123.918	77.7811	12.9166	85.5347	46.5531	63.0352	94.829	66.588	42.4583	32.6873	60.74	62.111
Copz2	ENSMUSG00000018672	294.074	803.266	325.498	396.117	346.145	393.34	371.07	230.497	207.676	237.464	214.134	210.081
Slc25a39	ENSMUSG00000018677	86.9274	127.278	441.748	189.339	102.117	117.666	182.237	77.686	123.683	190.356	142.07	136.096
Sp2	ENSMUSG00000018678	390.249	910.746	222.165	177.713	189.967	179.02	211.922	163.909	167.064	134.595	98.8312	91.3397
Aatf	ENSMUSG00000018697	1113.41	905.089	530.442	478.33	837.205	331.145	231.713	478.922	459.657	567.222	321.201	325.169
Lhx1	ENSMUSG00000018698	0	1.4142	0	0	0.750857	0.84047	0	1.70739	1.84601	0	0	0
Dync1h1	ENSMUSG00000018707	18940.9	14806.7	11916.9	4960.18	5948.29	6093.4	4015.8	5088.86	4915.93	4318.58	3844.12	3654.5
Cpsf4l	ENSMUSG00000018727	16.6457	2.8284	68.0274	9.13478	6.00685	20.1713	35.4578	11.9517	55.3804	12.4981	55.5925	39.2761
Pex12	ENSMUSG00000018733	253.384	38.1834	44.7775	44.8435	117.134	43.7044	32.984	50.3679	86.7626	87.4867	120.45	127.876
Ndel1	ENSMUSG00000018736	227.491	155.562	376.304	301.448	337.135	410.99	482.391	373.917	239.059	358.599	415.914	240.223
Slc25a35	ENSMUSG00000018740	1.84952	123.036	105.055	100.483	75.0857	76.4827	127.813	47.8068	81.2246	74.0272	68.9759	103.214
Zbtb4	ENSMUSG00000018750	2045.57	1814.42	728.496	400.269	473.04	466.461	249.029	308.183	431.044	273.997	263.55	148.884
Tnfsf12Tnfsf13	ENSMUSG00000018752	3.69904	0	0	0	0	0.84047	4.9476	1.70739	0	0	6.17695	9.13397
Mpdu1	ENSMUSG00000018761	72.1312	233.343	128.305	123.735	168.943	203.394	141.007	91.3451	144.912	137.479	125.598	165.325
Fxr2	ENSMUSG00000018765	491.972	629.32	498.581	257.435	188.465	342.071	272.943	307.329	293.516	283.611	317.083	200.034
Atp5g3	ENSMUSG00000018770	146.112	145.663	179.971	256.604	203.482	245.417	337.261	214.277	234.444	239.387	330.467	306.901
Cd68	ENSMUSG00000018774	36.9904	90.5089	111.083	83.8739	100.615	97.4945	94.0044	116.956	87.6856	57.6836	72.0644	102.3
Slc35g3	ENSMUSG00000018776	0	0	0	0	0	0	0	0	0	10.5753	2.05898	3.65359
[truncated: 39,129 more rows]

## Sheet: BZ_vs_RM
Gene_symbol	Gene_ENSEMBL	log2FoldChange	pvalue	padj	BZ_geo_RPK	RM_geo_RPK
NA	ENSMUSG00000101941	-4.07147	1.41963e-10	2.59323e-06	0.212365	20.3252
Lif	ENSMUSG00000034394	3.13952	7.88029e-10	7.19746e-06	60.051	6.15986
Thoc3	ENSMUSG00000025872	-3.21358	2.45953e-08	0.00011232	0.855951	20.029
Slc16a8	ENSMUSG00000032988	-3.77384	2.09226e-08	0.00011232	0.379817	12.4948
NA	ENSMUSG00000098925	4.05284	3.21949e-08	0.000117621	331.148	31.7178
NA	ENSMUSG00000098943	4.0368	4.08046e-08	0.00012423	322.988	30.7502
Rin1	ENSMUSG00000024883	3.06406	5.63109e-08	0.000146947	87.9539	6.13764
NA	ENSMUSG00000099291	3.94174	7.51908e-08	0.000171689	328.743	35.0997
Map1b	ENSMUSG00000052727	2.41252	1.12129e-07	0.000227584	336.041	63.078
NA	ENSMUSG00000098641	3.87583	1.30486e-07	0.000238358	325.178	36.0384
Pfkfb1	ENSMUSG00000025271	-2.38656	2.79193e-07	0.00043866	14.7448	102.179
Ces1d	ENSMUSG00000056973	-3.1152	2.88166e-07	0.00043866	3.08551	94.5943
Hspa1a	ENSMUSG00000091971	3.118	6.27758e-07	0.000882097	167.901	15.7911
Fosl1	ENSMUSG00000024912	2.87001	7.77903e-07	0.001015	47.6684	6.27789
Dtwd1	ENSMUSG00000023330	-3.26793	1.00196e-06	0.00101683	0.79321	15.851
Cttnbp2nl	ENSMUSG00000062127	1.61439	9.54187e-07	0.00101683	222.409	68.9555
NA	ENSMUSG00000065922	3.11591	9.49894e-07	0.00101683	2746.37	417.499
NA	ENSMUSG00000093677	-2.2456	8.67435e-07	0.00101683	35.0825	160.428
Ahnak2	ENSMUSG00000072812	2.45331	1.09949e-06	0.00105708	412.435	63.1323
D630029K05Rik	ENSMUSG00000031294	3.13909	1.32767e-06	0.00121262	140.549	15.3782
NA	ENSMUSG00000065884	2.80263	1.42305e-06	0.00123785	659.539	111.221
Phospho2	ENSMUSG00000027088	-1.9939	1.54878e-06	0.00128598	9.36487	39.4673
NA	ENSMUSG00000049740	-3.40022	1.66604e-06	0.00129233	0.389479	14.0867
NA	ENSMUSG00000086625	-3.27809	1.69793e-06	0.00129233	1.56053	37.5775
Cald1	ENSMUSG00000029761	2.9497	2.05614e-06	0.00146179	937.675	128.491
Rmrp	ENSMUSG00000088088	2.00739	2.08061e-06	0.00146179	2235.07	551.58
Serpine1	ENSMUSG00000037411	2.28022	2.21413e-06	0.00149798	1416.2	265.137
Plagl1	ENSMUSG00000019817	2.95507	2.63582e-06	0.0016603	12.9178	1.21353
NA	ENSMUSG00000092994	-3.19936	2.54968e-06	0.0016603	2.21598	106.23
Slc17a9	ENSMUSG00000023393	3.05121	3.31602e-06	0.00175117	379.065	63.0198
Il22ra1	ENSMUSG00000037157	2.59859	3.2399e-06	0.00175117	12.1742	1.56626
Dzank1	ENSMUSG00000037259	-1.21286	3.30132e-06	0.00175117	48.3381	114.436
Pla2g5	ENSMUSG00000041193	-2.75128	2.97304e-06	0.00175117	0.521759	9.13678
Hspa1b	ENSMUSG00000090877	3.12554	3.45115e-06	0.00175117	185.681	13.6994
NA	ENSMUSG00000097482	3.35048	3.42743e-06	0.00175117	21.6874	2.09403
NA	ENSMUSG00000099484	-3.30559	3.04681e-06	0.00175117	3.33205	106.144
Cacnb3	ENSMUSG00000003352	2.46728	4.11677e-06	0.00194178	43.4817	7.69864
Dnah5	ENSMUSG00000022262	3.58389	4.14571e-06	0.00194178	0.70715	0.019062
NA	ENSMUSG00000083832	-3.1582	3.97053e-06	0.00194178	1.84006	64.0343
Pdgfb	ENSMUSG00000000489	2.30091	4.26176e-06	0.00194624	119.892	21.3006
Mlph	ENSMUSG00000026303	2.58326	4.6438e-06	0.00206898	17.5883	2.59499
Fam163b	ENSMUSG00000009216	2.93081	5.33672e-06	0.00211926	55.2259	5.78587
Kif1a	ENSMUSG00000014602	2.83008	5.3077e-06	0.00211926	12.3368	1.91368
NA	ENSMUSG00000066697	3.21759	5.19523e-06	0.00211926	67.0991	10.5026
NA	ENSMUSG00000081429	-3.0968	5.1282e-06	0.00211926	2.21767	65.7939
NA	ENSMUSG00000088595	2.99326	4.96985e-06	0.00211926	1876.1	281.28
Igtp	ENSMUSG00000078853	-2.47675	5.69822e-06	0.00221467	1.12215	16.076
Bphl	ENSMUSG00000038286	-2.32722	5.89969e-06	0.0022452	1.90969	24.2222
NA	ENSMUSG00000097971	3.03603	6.03475e-06	0.00224973	20696.3	3448.87
Sox9	ENSMUSG00000000567	2.66324	6.75663e-06	0.00239085	33.2906	6.66557
Ncam1	ENSMUSG00000039542	2.49665	6.87701e-06	0.00239085	111.44	19.7987
Creb5	ENSMUSG00000053007	2.79293	6.93683e-06	0.00239085	624.255	83.9762
NA	ENSMUSG00000099618	-2.78899	6.89749e-06	0.00239085	9.52505	141.679
Slc38a3	ENSMUSG00000010064	-1.37675	7.07814e-06	0.00239438	147.817	391.286
Ryr3	ENSMUSG00000057378	2.59391	7.65377e-06	0.00249663	139.785	17.4999
NA	ENSMUSG00000085643	-2.70926	7.60399e-06	0.00249663	1.13472	29.282
Lgals4	ENSMUSG00000053964	-2.10199	8.00501e-06	0.00256539	45.8655	269.217
NA	ENSMUSG00000097329	-3.28577	8.4974e-06	0.00267624	0.196677	10.179
4933416C03Rik	ENSMUSG00000074734	3.3942	8.66981e-06	0.00268426	13.5282	0.704484
Fbln2	ENSMUSG00000064080	1.92119	9.14816e-06	0.00278516	318.468	82.2232
Tox2	ENSMUSG00000074607	3.19375	9.3297e-06	0.00279386	34.8124	3.68669
Sorbs3	ENSMUSG00000022091	1.91778	9.54321e-06	0.00281171	1188.67	311.932
Sh3bp2	ENSMUSG00000054520	2.3924	1.02036e-05	0.00293386	168.641	26.88
NA	ENSMUSG00000094686	-3.38142	1.0279e-05	0.00293386	0.114943	10.0729
Nr4a1	ENSMUSG00000023034	2.11077	1.11359e-05	0.0029864	516.07	124.808
Map1a	ENSMUSG00000027254	2.47541	1.12805e-05	0.0029864	176.456	27.4123
NA	ENSMUSG00000051805	-3.34722	1.08182e-05	0.0029864	0.181605	13.7673
NA	ENSMUSG00000065629	3.60247	1.08022e-05	0.0029864	23.4873	0.465116
Erdr1	ENSMUSG00000096768	2.84241	1.10836e-05	0.0029864	45045.3	10304.2
NA	ENSMUSG00000087371	2.79358	1.27369e-05	0.00328701	12.2056	1.78184
NA	ENSMUSG00000095562	2.82579	1.27759e-05	0.00328701	47264.6	10972.7
Junb	ENSMUSG00000052837	2.5198	1.33382e-05	0.00338401	269.965	51.7479
Insrr	ENSMUSG00000005640	3.31025	1.3597e-05	0.00340243	3.40855	0.0799771
Sh3rf3	ENSMUSG00000037990	2.77045	1.39726e-05	0.00342558	36.6677	4.25086
NA	ENSMUSG00000072672	3.25145	1.40646e-05	0.00342558	9.82561	0.255084
Cryab	ENSMUSG00000032060	2.17582	1.45716e-05	0.00350236	4588.65	1145.92
Pdlim7	ENSMUSG00000021493	1.63251	1.55504e-05	0.00356723	858.604	260.327
Fyb	ENSMUSG00000022148	2.56647	1.53432e-05	0.00356723	324.574	49.8444
Pink1	ENSMUSG00000028756	-1.5338	1.56226e-05	0.00356723	16.8014	50.143
Spaca6	ENSMUSG00000080316	2.52011	1.53794e-05	0.00356723	2248.26	362.566
NA	ENSMUSG00000072675	3.21402	1.58245e-05	0.00356871	10.472	0.272519
Kif5a	ENSMUSG00000074657	2.59855	1.62302e-05	0.00361558	89.6761	13.7757
Cep164	ENSMUSG00000043987	2.47315	1.67575e-05	0.00368807	167.383	30.9164
NA	ENSMUSG00000101335	-2.91694	1.70959e-05	0.00371776	0.621356	29.8717
NA	ENSMUSG00000099323	-3.12026	1.7356e-05	0.0037299	0.894975	56.2215
Ppp1r35	ENSMUSG00000029725	-3.0108	1.7792e-05	0.0037357	0.613136	21.0498
NA	ENSMUSG00000099428	-3.16985	1.77685e-05	0.0037357	1.51355	71.557
Slc46a1	ENSMUSG00000020829	-2.94715	1.8618e-05	0.00385635	0.191308	9.82453
Dkk2	ENSMUSG00000028031	2.52464	1.87888e-05	0.00385635	25.092	3.80322
Scube2	ENSMUSG00000007279	1.73993	2.03344e-05	0.0039613	170.138	54.7953
Piezo1	ENSMUSG00000014444	1.80336	2.03844e-05	0.0039613	167.067	52.9357
March8	ENSMUSG00000025702	-1.86289	2.01701e-05	0.0039613	11.2979	42.8951
Vapb	ENSMUSG00000054455	-1.5019	2.03075e-05	0.0039613	13.6112	38.9758
NA	ENSMUSG00000092931	3.11577	1.98473e-05	0.0039613	99.67	9.99985
Alkbh7	ENSMUSG00000002661	-2.38667	2.0637e-05	0.00396817	2.41106	38.6654
Dgkz	ENSMUSG00000040479	2.72227	2.12693e-05	0.00404715	2482.72	558.38
1700017D01Rik	ENSMUSG00000024729	3.1452	2.24811e-05	0.00422548	6.42157	0.347616
NA	ENSMUSG00000098788	-3.00715	2.26691e-05	0.00422548	5.30144	151.193
Pde9a	ENSMUSG00000041119	-3.16416	2.50472e-05	0.00454195	0.127133	6.10757
NA	ENSMUSG00000088185	2.44784	2.47562e-05	0.00454195	10249.1	2510.3
NA	ENSMUSG00000089995	2.85741	2.51129e-05	0.00454195	39.2499	4.25566
Myh9	ENSMUSG00000022443	2.49919	2.53931e-05	0.0045476	1144.06	250.232
NA	ENSMUSG00000083771	-2.82541	2.59119e-05	0.00459547	1.02363	52.7442
Plekho1	ENSMUSG00000015745	2.13941	2.69594e-05	0.0046025	1413.5	329.006
Lrtm1	ENSMUSG00000045776	-2.10608	2.62987e-05	0.0046025	50.641	252.614
NA	ENSMUSG00000082277	3.05236	2.65285e-05	0.0046025	30.2247	4.59359
NA	ENSMUSG00000083627	2.58656	2.6771e-05	0.0046025	81.1108	11.2797
Pigr	ENSMUSG00000026417	3.14402	2.75466e-05	0.0046592	3.46972	0.547073
Olfr419	ENSMUSG00000050788	-3.30365	2.80333e-05	0.00469803	0.174846	9.51139
NA	ENSMUSG00000091611	2.25325	2.90623e-05	0.00482619	#VALUE!	#VALUE!
NA	ENSMUSG00000097353	-1.95579	2.95055e-05	0.00485565	13.5327	66.8546
Lta	ENSMUSG00000024402	3.19274	3.02216e-05	0.00492909	9.56212	1.15689
Crb2	ENSMUSG00000035403	-2.45899	3.09457e-05	0.00500253	0.23987	3.39968
Scn10a	ENSMUSG00000034533	2.5714	3.1511e-05	0.00500531	353.899	70.6613
NA	ENSMUSG00000078677	2.94403	3.14512e-05	0.00500531	283.848	32.0337
NA	ENSMUSG00000083307	2.8258	3.29559e-05	0.0051897	33.0243	3.29671
Tmem25	ENSMUSG00000002032	-1.21539	3.44246e-05	0.00522182	38.0813	89.6383
Slc39a13	ENSMUSG00000002105	2.01144	3.40962e-05	0.00522182	1110.96	287.367
Uck2	ENSMUSG00000026558	2.08712	3.391e-05	0.00522182	393.126	92.7007
Chrnb1	ENSMUSG00000041189	2.16772	3.38471e-05	0.00522182	87.8877	14.8372
Arhgap23	ENSMUSG00000049807	2.03817	3.45892e-05	0.00522182	758.307	173.485
Sptbn4	ENSMUSG00000011751	2.09818	3.56836e-05	0.00529945	13.4418	3.52553
Msn	ENSMUSG00000031207	1.58301	3.55612e-05	0.00529945	1207.77	407.257
H2afx	ENSMUSG00000049932	1.93666	3.65539e-05	0.00538493	117.078	28.5522
Glis1	ENSMUSG00000034762	2.78427	3.69217e-05	0.00539559	21.3826	3.00933
Ppip5k2	ENSMUSG00000040648	-1.13822	3.81892e-05	0.00549294	403.779	947.791
NA	ENSMUSG00000088086	-3.05097	3.79739e-05	0.00549294	0.979589	36.2157
Ung	ENSMUSG00000029591	-1.74452	3.85364e-05	0.00549957	11.224	44.7119
Fgfbp3	ENSMUSG00000047632	2.64946	3.89042e-05	0.00550901	14.9038	2.13482
Gm22	ENSMUSG00000043903	2.33968	3.99185e-05	0.00560917	329.861	75.651
Iqgap2	ENSMUSG00000021676	-1.33655	4.04393e-05	0.00563896	11.8754	32.3059
Flna	ENSMUSG00000031328	1.79387	4.17102e-05	0.00568598	330.297	87.4862
Cpne2	ENSMUSG00000034361	1.92598	4.1557e-05	0.00568598	48.2782	11.9448
Irs2	ENSMUSG00000038894	2.09433	4.11845e-05	0.00568598	438.367	102.169
Angpt4	ENSMUSG00000027460	3.22635	4.22967e-05	0.00572321	4.96746	0.340023
Ecm1	ENSMUSG00000028108	1.81439	4.47106e-05	0.00596152	403.48	114.349
NA	ENSMUSG00000086991	-2.25423	4.46776e-05	0.00596152	87.3723	381.412
Actn1	ENSMUSG00000015143	2.03095	4.505e-05	0.00596324	383.507	97.7145
Zfp697	ENSMUSG00000050064	2.15019	4.55962e-05	0.00599213	157.284	40.8744
Opcml	ENSMUSG00000062257	2.94592	4.73183e-05	0.00617403	1.75283	0.169466
Lxn	ENSMUSG00000047557	-2.56332	4.94008e-05	0.00640003	1.31811	41.57
Mylk2	ENSMUSG00000027470	2.56212	5.07704e-05	0.00644043	37.2673	1.89421
9430020K01Rik	ENSMUSG00000033960	1.69333	5.06777e-05	0.00644043	158.086	44.6226
Sprr1a	ENSMUSG00000050359	2.24351	5.05808e-05	0.00644043	287.868	61.4654
Rnf19b	ENSMUSG00000028793	1.65059	5.13879e-05	0.00647382	73.4085	24.3695
Rxfp1	ENSMUSG00000034009	-2.5403	5.34496e-05	0.00665676	0.570693	14.6963
Krt222	ENSMUSG00000035849	-1.80757	5.35689e-05	0.00665676	9.0545	38.9135
1700024P16Rik	ENSMUSG00000078612	-2.14186	5.43719e-05	0.00671089	4.36626	35.7321
Thbs4	ENSMUSG00000021702	2.02829	5.50514e-05	0.00674915	166.37	40.5341
Ccdc117	ENSMUSG00000020482	-1.88685	5.74552e-05	0.00677586	7.3677	33.8159
Fam107a	ENSMUSG00000021750	3.04659	5.63204e-05	0.00677586	5.42708	0.613437
Fn1	ENSMUSG00000026193	1.32592	5.73349e-05	0.00677586	204.018	75.4092
Des	ENSMUSG00000026208	1.77654	5.74948e-05	0.00677586	6012.66	1775.15
NA	ENSMUSG00000086677	-2.79961	5.66318e-05	0.00677586	0.479763	15.4654
NA	ENSMUSG00000097338	3.00918	5.69633e-05	0.00677586	6.43108	1.52553
LOC102634333	ENSMUSG00000090066	1.88784	6.01995e-05	0.00704913	1732.78	518.752
Ppp4r1l-ps	ENSMUSG00000055897	2.36583	6.09071e-05	0.00705968	678.66	170.627
NA	ENSMUSG00000086585	-3.13912	6.10626e-05	0.00705968	0.259266	12.3627
Pelp1	ENSMUSG00000018921	1.95702	6.35583e-05	0.00716679	127.111	35.8436
Tln1	ENSMUSG00000028465	1.53799	6.34396e-05	0.00716679	687.943	247.243
Hrh3	ENSMUSG00000039059	3.24596	6.30813e-05	0.00716679	1.79799	0.0847723
Kcnd2	ENSMUSG00000060882	-0.995479	6.33016e-05	0.00716679	67.8074	138.457
NA	ENSMUSG00000081320	-2.82928	6.40113e-05	0.00717359	0.752234	24.9836
Angpt1	ENSMUSG00000022309	-2.03621	6.49867e-05	0.0072237	3.23964	19.3268
Mthfr	ENSMUSG00000029009	1.57977	6.53853e-05	0.0072237	254.738	91.2866
NA	ENSMUSG00000097151	2.12195	6.56448e-05	0.0072237	87.1959	24.2693
Ctbs	ENSMUSG00000028189	-2.52853	7.04981e-05	0.00759802	0.734969	9.77237
Irx5	ENSMUSG00000031737	1.65865	7.07102e-05	0.00759802	16.2382	4.72892
Cd3d	ENSMUSG00000032094	2.94847	7.04823e-05	0.00759802	11.9929	1.96711
Cspg4	ENSMUSG00000032911	2.14385	7.06734e-05	0.00759802	620.16	131.36
Myh10	ENSMUSG00000020900	1.99213	7.38634e-05	0.00779921	658.762	167.623
Srek1	ENSMUSG00000032621	2.41439	7.37518e-05	0.00779921	2690.41	655.859
BC004004	ENSMUSG00000052712	-1.23728	7.36134e-05	0.00779921	71.7068	172.161
Npas4	ENSMUSG00000045903	2.21443	7.5158e-05	0.0078903	47.1579	9.37746
Fhad1	ENSMUSG00000051435	1.94543	7.68703e-05	0.00802394	29.7489	8.24223
NA	ENSMUSG00000081817	-2.57543	8.087e-05	0.00839348	0.718446	17.4071
NA	ENSMUSG00000089417	1.76043	8.1582e-05	0.00841954	6551.3	1993.26
NA	ENSMUSG00000075015	3.14308	8.30844e-05	0.00852642	13581	2127.93
NA	ENSMUSG00000081077	-2.05772	8.35552e-05	0.00852684	8.56299	51.239
NA	ENSMUSG00000053664	2.4372	8.88645e-05	0.00887395	#VALUE!	#VALUE!
Arfgap3	ENSMUSG00000054277	1.66967	8.86406e-05	0.00887395	74.1798	25.1493
NA	ENSMUSG00000075014	3.14638	8.84074e-05	0.00887395	34206.6	5192.14
NA	ENSMUSG00000087838	-2.25288	8.88998e-05	0.00887395	2.77505	58.748
Itga5	ENSMUSG00000000555	1.64736	9.39663e-05	0.00899206	1945.32	608.637
Myc	ENSMUSG00000022346	2.18923	9.1876e-05	0.00899206	937.725	173.34
Sbk2	ENSMUSG00000030433	-2.68021	9.50986e-05	0.00899206	0.21786	4.69915
Fam124a	ENSMUSG00000035184	2.48637	9.47581e-05	0.00899206	113.128	15.0493
Rras	ENSMUSG00000038387	1.10131	9.24078e-05	0.00899206	248.914	112.264
Preb	ENSMUSG00000045302	2.32476	9.34636e-05	0.00899206	792.611	124.849
Gm5124	ENSMUSG00000051537	2.70576	9.15809e-05	0.00899206	10.1908	1.36592
Vsig10l	ENSMUSG00000070604	1.56522	9.26609e-05	0.00899206	79.3497	28.2554
Pak6	ENSMUSG00000074923	2.29861	9.47e-05	0.00899206	367.603	88.9706
NA	ENSMUSG00000095186	3.12993	9.69747e-05	0.00899206	1127.56	166.76
NA	ENSMUSG00000095280	3.11268	9.60769e-05	0.00899206	6995.54	1109.56
NA	ENSMUSG00000095547	3.12167	9.59876e-05	0.00899206	3132.08	470.359
NA	ENSMUSG00000096385	3.12496	9.368e-05	0.00899206	2930.19	433.151
NA	ENSMUSG00000098670	-3.19795	9.69412e-05	0.00899206	0.628931	20.2499
Dlgap4	ENSMUSG00000061689	1.522	9.87222e-05	0.00910787	842.562	301.535
Dnmt1	ENSMUSG00000004099	1.88799	0.000104139	0.00918417	109.015	30.7823
Fndc8	ENSMUSG00000018844	-3.00639	0.000104898	0.00918417	0.0793705	4.5855
Fam129b	ENSMUSG00000026796	2.33296	0.000105659	0.00918417	68.169	12.3229
Gnas	ENSMUSG00000027523	2.02126	0.000102068	0.00918417	131.531	37.5599
Cttn	ENSMUSG00000031078	1.49736	0.000105847	0.00918417	247.185	88.3293
Gse1	ENSMUSG00000031822	2.27921	0.000105622	0.00918417	279.708	73.9996
C530008M17Rik	ENSMUSG00000036377	1.83451	0.000104667	0.00918417	38.4083	11.5706
Col16a1	ENSMUSG00000040690	2.17094	0.000100473	0.00918417	38.9892	7.30571
Zfp444	ENSMUSG00000044876	1.17772	0.000102578	0.00918417	21.6877	9.43233
Rasl11b	ENSMUSG00000049907	1.47891	0.000103866	0.00918417	1092.03	353.91
Gpc6	ENSMUSG00000058571	2.35207	0.00010653	0.00918417	45.7957	10.506
NA	ENSMUSG00000074564	3.10478	0.000106588	0.00918417	1891.73	289.609
NA	ENSMUSG00000084875	3.09364	0.000103052	0.00918417	32.6824	1.48491
NA	ENSMUSG00000087190	-2.69774	0.000104683	0.00918417	0.1878	5.7297
C230029F24Rik	ENSMUSG00000051616	2.9653	0.000107253	0.00919805	23.4119	1.88263
Slc9a5	ENSMUSG00000014786	1.98873	0.000109401	0.00926158	42.0662	11.3449
NA	ENSMUSG00000091028	3.1032	0.000109515	0.00926158	1900.27	310.429
NA	ENSMUSG00000097312	3.09866	0.000108807	0.00926158	1620.55	267.788
Tenm1	ENSMUSG00000016150	2.67014	0.000110589	0.00929939	6.61541	1.50345
Il17re	ENSMUSG00000043088	-2.7264	0.000111322	0.00929939	0.174237	3.79316
Map6	ENSMUSG00000055407	2.17982	0.00011217	0.00929939	51.2425	9.03417
NA	ENSMUSG00000086113	-2.96806	0.000113016	0.00929939	#VALUE!	#VALUE!
NA	ENSMUSG00000096519	3.09181	0.000111725	0.00929939	578.076	100.757
NA	ENSMUSG00000096736	3.08487	0.000112988	0.00929939	392.191	68.6842
NA	ENSMUSG00000095891	3.09105	0.00011371	0.00931456	6929.34	1060.95
Med15	ENSMUSG00000012114	2.08196	0.00011623	0.00942743	1065.98	303.617
Pcyt1b	ENSMUSG00000035246	3.09482	0.000116033	0.00942743	1.35154	0.0349699
Casc1	ENSMUSG00000043541	-2.09443	0.000118701	0.00942743	1.02579	6.23185
Als2cl	ENSMUSG00000044037	1.91887	0.000118658	0.00942743	137.862	36.7634
Cltb	ENSMUSG00000047547	1.73063	0.000118594	0.00942743	316.935	99.1989
NA	ENSMUSG00000086328	-2.45136	0.000118004	0.00942743	1.79638	25.2822
NA	ENSMUSG00000096201	3.07498	0.000117307	0.00942743	704.027	111.336
Dmtn	ENSMUSG00000022099	2.67666	0.000126409	0.00996517	21.1666	4.20163
NA	ENSMUSG00000088249	-3.05756	0.000126563	0.00996517	1.55824	67.2567
Prpf38b	ENSMUSG00000027881	2.33301	0.000129004	0.0100706	3362.97	819.996
Casp4	ENSMUSG00000033538	-2.35562	0.000128874	0.0100706	1.91562	16.6918
Fbxl19	ENSMUSG00000030811	2.06761	0.000131268	0.0102037	156.351	46.9449
Tgfb1i1	ENSMUSG00000030782	1.79141	0.000133977	0.0103662	280.001	66.8225
Cst10	ENSMUSG00000033156	-2.8159	0.000135029	0.0103662	0.189935	7.3557
NA	ENSMUSG00000100313	-2.85656	0.000135061	0.0103662	0.104556	3.06906
Taf1c	ENSMUSG00000031832	2.25786	0.000136345	0.010421	102.538	22.3428
NA	ENSMUSG00000067063	-2.03138	0.000142145	0.0107741	25.2051	318.439
NA	ENSMUSG00000085218	-1.9949	0.000142116	0.0107741	22.0436	137.66
Rab3c	ENSMUSG00000021700	2.33413	0.000146807	0.0110656	4.14729	0.87268
Slc16a1	ENSMUSG00000032902	-1.44715	0.000147202	0.0110656	24.3591	71.1384
Shroom3	ENSMUSG00000029381	1.73371	0.00014896	0.0111519	2228.9	632.996
Cnnm4	ENSMUSG00000037408	1.98593	0.000151299	0.0112807	63.377	18.7202
Adssl1	ENSMUSG00000011148	1.33307	0.000154461	0.0113315	479.578	198.894
Drap1	ENSMUSG00000024914	2.03236	0.000153631	0.0113315	198.008	52.4225
Hspg2	ENSMUSG00000028763	2.00757	0.000154157	0.0113315	2552.58	757.966
NA	ENSMUSG00000065637	2.26595	0.000154247	0.0113315	750.673	214.341
Zfp750	ENSMUSG00000039238	-2.42228	0.000155255	0.0113442	1.52038	10.776
Tnfrsf21	ENSMUSG00000023915	2.19599	0.000157713	0.0114323	56.9237	13.4106
Anp32b	ENSMUSG00000028333	2.172	0.000157457	0.0114323	354.493	83.8138
Arhgap44	ENSMUSG00000033389	1.13924	0.000160464	0.0115401	230.072	106.115
Zxdb	ENSMUSG00000073062	1.645	0.000160036	0.0115401	51.0647	17.9675
NA	ENSMUSG00000082697	2.40474	0.000161983	0.0116037	#VALUE!	#VALUE!
Hopx	ENSMUSG00000059325	-2.5536	0.000164918	0.0117678	2.43688	32.225
Epha5	ENSMUSG00000029245	2.25869	0.000165706	0.0117781	3.98449	0.730055
Lama1	ENSMUSG00000032796	2.98588	0.000167014	0.011825	0.585435	0.0178889
NA	ENSMUSG00000045799	1.98468	0.000171387	0.0119623	338.38	87.0656
Actn4	ENSMUSG00000054808	1.96892	0.000171353	0.0119623	3028.33	826.412
NA	ENSMUSG00000074485	1.50701	0.000171573	0.0119623	246.266	85.1187
NA	ENSMUSG00000091487	-2.90895	0.000170829	0.0119623	0.267366	11.9503
Rtn4	ENSMUSG00000020458	1.20284	0.000174601	0.0121042	883.46	375.434
NA	ENSMUSG00000081657	2.17928	0.000174934	0.0121042	1362.68	294.875
Scaf1	ENSMUSG00000038406	2.19633	0.000176269	0.0121506	475.631	142.981
Hspb1	ENSMUSG00000004951	1.88088	0.000182532	0.012535	630.838	158.694
Plk2	ENSMUSG00000021701	1.45278	0.000186116	0.0127332	487.113	162.38
Plbd1	ENSMUSG00000030214	-1.97681	0.00018946	0.012886	7.02523	50.3118
Inf2	ENSMUSG00000037679	1.9539	0.000190118	0.012886	69.4197	12.8451
NA	ENSMUSG00000055497	2.47896	0.000190465	0.012886	84.6282	19.7029
Tlr5	ENSMUSG00000079164	2.12774	0.000192607	0.0129829	5.66102	1.03179
Ddah2	ENSMUSG00000007039	2.18443	0.000198345	0.0133204	67.3017	13.7071
Usp53	ENSMUSG00000039701	1.63583	0.000199348	0.0133388	267.385	84.7378
Ribc2	ENSMUSG00000022431	-2.50919	0.00020248	0.0134989	0.44939	14.3773
Sbno2	ENSMUSG00000035673	1.72239	0.000205564	0.0136547	421.492	131.181
NA	ENSMUSG00000095803	2.30201	0.000207751	0.0137499	#VALUE!	#VALUE!
Tst	ENSMUSG00000044986	-2.79741	0.000213851	0.0141026	0.266985	11.8896
NA	ENSMUSG00000085194	2.42376	0.000219136	0.0143475	1029.1	273.695
NA	ENSMUSG00000096544	2.03104	0.00021859	0.0143475	711.15	171.88
Zkscan7	ENSMUSG00000063488	-2.38879	0.000224257	0.0146304	0.833976	23.048
NA	ENSMUSG00000050189	2.61756	0.000226073	0.0146854	46.5901	7.95887
NA	ENSMUSG00000086407	-2.17492	0.000226708	0.0146854	0.49789	10.5186
Ssh1	ENSMUSG00000042121	1.63598	0.000234343	0.0151263	108.955	31.0665
Tiam2	ENSMUSG00000023800	1.71786	0.000235283	0.0151335	459.518	152.006
Fitm1	ENSMUSG00000022215	-1.65065	0.000238944	0.0153084	12.6566	44.4279
Taok3	ENSMUSG00000061288	1.28273	0.000239934	0.0153084	139.535	57.5514
NA	ENSMUSG00000100901	-2.51333	0.000240517	0.0153084	1.90012	15.3449
NA	ENSMUSG00000074876	2.39997	0.000241932	0.015345	47.465	12.2641
Rab13	ENSMUSG00000027935	1.98346	0.000243254	0.0153755	19.2489	3.67842
NA	ENSMUSG00000060550	1.29623	0.000246706	0.0154865	15.1406	6.00077
1700066B19Rik	ENSMUSG00000073598	2.26608	0.000246498	0.0154865	13.4472	2.94294
Rbm25	ENSMUSG00000010608	2.20102	0.000249011	0.0155723	10306.5	2703.05
Alas2	ENSMUSG00000025270	-1.8487	0.000250142	0.0155723	15.0593	55.3881
NA	ENSMUSG00000090561	-2.21703	0.00025063	0.0155723	3.1957	30.9063
Zc3h4	ENSMUSG00000059273	1.87816	0.000256845	0.0159044	357.309	113.029
Xirp2	ENSMUSG00000027022	1.86992	0.000260122	0.0160376	19621.3	4625.79
NA	ENSMUSG00000085396	1.02866	0.000260752	0.0160376	186.437	90.068
NA	ENSMUSG00000030068	-1.8084	0.000266701	0.0162958	6.03971	29.4175
Col4a1	ENSMUSG00000031502	1.80252	0.000266735	0.0162958	465.984	156.512
Col4a4	ENSMUSG00000067158	1.70545	0.000272432	0.0165884	18.807	6.47287
Cdc37l1	ENSMUSG00000024780	-1.38949	0.000283922	0.0172306	158.168	448.267
Flnc	ENSMUSG00000068699	1.74643	0.000285482	0.0172679	3416.05	1107.79
Ubc	ENSMUSG00000008348	1.70178	0.000287863	0.0173545	36093.6	12239.6
Gm16853	ENSMUSG00000097665	-2.50011	0.000292652	0.0175851	0.205139	7.87286
LOC102638758	ENSMUSG00000097228	2.81675	0.000294514	0.017639	5.42229	0.340496
Mical3	ENSMUSG00000051586	1.97979	0.000296881	0.0176649	2311.87	630.091
D330041H03Rik	ENSMUSG00000073437	-1.63782	0.000295994	0.0176649	30.3807	82.555
Gtf2f1	ENSMUSG00000002658	2.23278	0.00029901	0.0176764	426.987	124.831
NA	ENSMUSG00000064400	2.96092	0.000298992	0.0176764	21.6785	0.945463
Evpl	ENSMUSG00000034282	2.298	0.000300208	0.01769	3.10447	0.342797
Dhrs7c	ENSMUSG00000033044	-2.15458	0.000303916	0.0177773	9.116	143.467
Snhg11	ENSMUSG00000044349	1.35319	0.000304281	0.0177773	154.491	59.5619
NA	ENSMUSG00000085822	2.91936	0.00030461	0.0177773	5.22609	0.229646
Cherp	ENSMUSG00000052488	1.88766	0.000310596	0.0180475	566.8	184.409
NA	ENSMUSG00000100546	-2.74542	0.000311216	0.0180475	0.0927644	2.45095
NA	ENSMUSG00000044341	1.77806	0.000315974	0.0182655	#VALUE!	#VALUE!
NA	ENSMUSG00000055872	2.42651	0.000324789	0.0186775	119.798	32.7391
NA	ENSMUSG00000073867	2.14586	0.000325705	0.0186775	270.805	80.9651
NA	ENSMUSG00000085363	-2.12559	0.000326169	0.0186775	3.66241	20.2368
Cyb5r3	ENSMUSG00000018042	1.97199	0.000332355	0.0189132	127.833	40.4396
Map3k6	ENSMUSG00000028862	2.26972	0.000331666	0.0189132	32.1043	5.66188
Adap1	ENSMUSG00000056413	2.83616	0.000339405	0.0192544	3.87567	0.437028
Map1s	ENSMUSG00000019261	2.12626	0.000346684	0.0195623	86.2734	23.0337
Prrc2a	ENSMUSG00000024393	1.81182	0.000348775	0.0195623	966.553	340.431
Map9	ENSMUSG00000033900	2.33303	0.000350187	0.0195623	13.3673	2.42828
Smim20	ENSMUSG00000061461	-1.72745	0.0003477	0.0195623	25.142	112.929
Gm16793	ENSMUSG00000097357	-1.74198	0.000350144	0.0195623	5.69687	57.4869
Rbm19	ENSMUSG00000029594	1.89253	0.00035628	0.0196865	155.617	50.3054
Mical2	ENSMUSG00000038244	1.19562	0.00035507	0.0196865	3069.34	1372.68
Prune2	ENSMUSG00000039126	1.69999	0.000357799	0.0196865	6148.39	2112.01
NA	ENSMUSG00000042360	2.81889	0.000357157	0.0196865	4.66692	1.74891
Lmod1	ENSMUSG00000048096	2.563	0.000354428	0.0196865	7.626	0.711487
Acta1	ENSMUSG00000031972	1.80921	0.000360042	0.0197504	2211.68	634.479
Slc16a12	ENSMUSG00000009378	-2.22337	0.000361803	0.0197688	0.384026	3.68921
Tnfrsf14	ENSMUSG00000042333	-2.40382	0.000362542	0.0197688	0.455563	15.6525
Acaa2	ENSMUSG00000036880	-1.86265	0.000366681	0.0198759	11.5656	44.358
NA	ENSMUSG00000089309	-2.91339	0.000365913	0.0198759	0.769231	35.0797
Foxn1	ENSMUSG00000002057	2.83471	0.000371186	0.020043	5.54696	0.203408
Fmnl3	ENSMUSG00000023008	1.54416	0.000371958	0.020043	125.416	38.7132
Car11	ENSMUSG00000003273	1.61369	0.000377108	0.0201563	187.093	58.0469
Fbxw4	ENSMUSG00000040913	1.7952	0.000375692	0.0201563	98.1467	28.3809
Zfp865	ENSMUSG00000074405	1.77473	0.000377371	0.0201563	170.384	55.7458
Adam9	ENSMUSG00000031555	1.21473	0.000379158	0.0201654	166.327	72.0889
NA	ENSMUSG00000057160	2.55017	0.00037975	0.0201654	44.2138	10.357
Ttbk1	ENSMUSG00000015599	2.20429	0.000382103	0.0202078	3.99638	1.03141
NA	ENSMUSG00000088514	2.74029	0.00038276	0.0202078	15.2981	1.98036
Rnd1	ENSMUSG00000054855	1.62486	0.000385944	0.0202498	75.5648	23.6679
Chst3	ENSMUSG00000057337	1.54845	0.000385869	0.0202498	24.8301	8.83361
NA	ENSMUSG00000077506	1.59441	0.000386883	0.0202498	1889.68	633.569
Asb6	ENSMUSG00000039483	1.5417	0.000391865	0.0203519	98.2654	37.6511
Fat1	ENSMUSG00000070047	1.45286	0.000392176	0.0203519	498.442	184.754
NA	ENSMUSG00000089161	2.31452	0.000391637	0.0203519	118.272	19.0736
Bcl2l11	ENSMUSG00000027381	-1.47983	0.000395212	0.0204514	4.0456	11.4733
Ubxn11	ENSMUSG00000012126	-1.80596	0.000399696	0.0206056	6.02023	22.206
NA	ENSMUSG00000091089	-1.99845	0.000400449	0.0206056	4.20454	30.9302
Map7d1	ENSMUSG00000028849	1.86723	0.000403209	0.0206314	2299.92	791.593
Slc25a15	ENSMUSG00000031482	-2.18035	0.000403186	0.0206314	0.588347	8.78488
4933411K16Rik	ENSMUSG00000090369	2.18392	0.000406685	0.0207511	63.2691	7.18833
NA	ENSMUSG00000034674	1.42195	0.000412773	0.0210031	44.717	17.6005
Lrrk1	ENSMUSG00000015133	1.52932	0.000415224	0.0210691	50.6575	19.3677
Rassf4	ENSMUSG00000042129	2.00926	0.000418086	0.0211499	10.8198	3.0161
NA	ENSMUSG00000090188	-2.31522	0.000419131	0.0211499	1.03795	12.0943
Sf3a3	ENSMUSG00000028902	1.31762	0.000420301	0.0211505	168.968	68.6735
Kif21b	ENSMUSG00000041642	2.2093	0.000426443	0.0214006	15.4553	2.09142
NA	ENSMUSG00000089670	1.41963	0.000429155	0.0214777	1487.13	555.031
Cyp2u1	ENSMUSG00000027983	-1.5706	0.000438201	0.0218706	4.94469	17.7712
LOC102632940	ENSMUSG00000086817	-2.82581	0.000441149	0.0219577	0.326696	4.35877
Vat1	ENSMUSG00000034993	1.99138	0.000442811	0.0219805	63.2407	20.3753
Rrbp1	ENSMUSG00000027422	1.79331	0.000445486	0.0220534	1283.8	408.511
Arhgef18	ENSMUSG00000004568	1.33871	0.000454513	0.0224395	200.376	84.0202
Srf	ENSMUSG00000015605	1.78302	0.00045977	0.022539	278.621	97.763
Ppfia4	ENSMUSG00000026458	1.98625	0.000459973	0.022539	68.4662	15.0568
NA	ENSMUSG00000098178	2.11278	0.000460232	0.022539	741087	166322
NA	ENSMUSG00000083579	2.20306	0.000464223	0.0226737	400.273	68.0934
Ammecr1	ENSMUSG00000042225	1.5841	0.00046822	0.0227473	79.2405	28.3443
NA	ENSMUSG00000089855	2.28458	0.000467527	0.0227473	811.751	210.076
NA	ENSMUSG00000101477	-2.26505	0.000471418	0.0228419	4.87909	71.7421
NA	ENSMUSG00000074780	2.04836	0.000472731	0.0228449	110.552	22.2355
Traf3	ENSMUSG00000021277	1.04856	0.000474673	0.0228782	61.9731	29.4936
Rcl1	ENSMUSG00000024785	1.8556	0.000482871	0.0231512	69.3712	20.3553
Cdk11b	ENSMUSG00000029062	2.18112	0.000482793	0.0231512	1143.06	277.656
Il17ra	ENSMUSG00000002897	1.83769	0.000487501	0.023312	34.8085	7.46541
Ltbp3	ENSMUSG00000024940	1.66478	0.000493184	0.0235222	250.627	89.5637
NA	ENSMUSG00000086417	-2.6668	0.000496018	0.0235957	0.447651	12.2831
Fntb	ENSMUSG00000033373	1.59547	0.000499989	0.0236728	108.014	34.9147
NA	ENSMUSG00000064427	2.55422	0.00050023	0.0236728	64.7824	8.31877
Mtmr7	ENSMUSG00000039431	-1.39298	0.000502239	0.0237064	5.96141	21.2171
Pdgfa	ENSMUSG00000025856	1.30416	0.00051267	0.0241169	783.377	284.695
NA	ENSMUSG00000088689	1.66534	0.000513574	0.0241169	7495.28	2587.37
Klc1	ENSMUSG00000021288	1.4953	0.000515458	0.0241433	1446.66	551.751
Lars2	ENSMUSG00000035202	2.14432	0.000517554	0.0241794	62750.5	17023.5
Upp2	ENSMUSG00000026839	-2.50622	0.000520469	0.0241919	0.286035	3.96648
Fzd1	ENSMUSG00000044674	1.93934	0.000519209	0.0241919	21.4441	5.65963
Hdac5	ENSMUSG00000008855	1.97227	0.000523989	0.0242937	800.287	249.077
Plcb1	ENSMUSG00000051177	1.66693	0.000528021	0.0244186	93.6535	33.2282
Grin2d	ENSMUSG00000002771	1.97672	0.000533607	0.0244477	38.3704	12.4632
5430419D17Rik	ENSMUSG00000006204	1.63801	0.000534482	0.0244477	71.8582	24.6855
Zfp608	ENSMUSG00000052713	1.71552	0.000535451	0.0244477	301.15	94.9941
Oscar	ENSMUSG00000054594	-2.31094	0.000536679	0.0244477	0.33946	5.87743
Ccdc112	ENSMUSG00000071855	2.04866	0.000533009	0.0244477	15.947	1.31745
Utp14b	ENSMUSG00000079470	-1.76492	0.000534227	0.0244477	3.7787	18.1472
Myo18b	ENSMUSG00000072720	1.92458	0.000539614	0.0245202	6605.26	1998.42
Phlda1	ENSMUSG00000020205	1.33301	0.000542538	0.0245919	330.087	133.981
Trim44	ENSMUSG00000027189	1.92614	0.000550835	0.0248447	831.566	294.753
NA	ENSMUSG00000064558	2.2064	0.00054999	0.0248447	511.269	125.326
Mmab	ENSMUSG00000029575	-1.03288	0.000561273	0.0251911	18.3894	39.0449
Zscan18	ENSMUSG00000070822	2.17144	0.00056076	0.0251911	37.2676	5.84949
Scn5a	ENSMUSG00000032511	1.86421	0.00056298	0.0252058	4170.32	1317.74
Gabbr1	ENSMUSG00000024462	1.32942	0.000565651	0.0252634	100.188	41.8443
Rpph1	ENSMUSG00000092837	2.19648	0.000568277	0.0253188	941.85	283.637
NA	ENSMUSG00000097967	2.82955	0.000570876	0.0253727	6.34572	0.16129
Cep170b	ENSMUSG00000072825	1.96701	0.000573433	0.0254245	142.827	37.0846
Kank1	ENSMUSG00000032702	1.48913	0.000575447	0.025452	829.947	325.947
Efnb3	ENSMUSG00000003934	-2.19901	0.000583797	0.0256131	0.958375	13.5464
Nfatc1	ENSMUSG00000033016	1.56377	0.000582818	0.0256131	310.241	116.897
Plekhm1	ENSMUSG00000034247	1.244	0.000586471	0.0256131	224.947	98.0712
Acd	ENSMUSG00000038000	1.76047	0.000586271	0.0256131	112.024	38.9234
Zfp414	ENSMUSG00000073423	1.36013	0.000587503	0.0256131	277.942	110.368
NA	ENSMUSG00000082367	-2.32319	0.00058478	0.0256131	1.0248	21.9304
Foxp4	ENSMUSG00000023991	1.78098	0.000592268	0.0257594	220.715	76.3979
B3gat1	ENSMUSG00000045994	-2.40405	0.000596267	0.0258718	0.115215	2.32078
E2f8	ENSMUSG00000046179	1.35634	0.000603006	0.0260405	18.6754	7.00037
Mpzl3	ENSMUSG00000070305	1.35935	0.000601887	0.0260405	31.4149	11.9129
Zfp526	ENSMUSG00000046541	1.78854	0.000606124	0.0261134	251.404	91.562
Zrsr1	ENSMUSG00000044068	1.5751	0.00060762	0.0261162	193.176	74.0663
Micall1	ENSMUSG00000033039	1.78336	0.000613324	0.0262995	771.849	271.827
Antxr1	ENSMUSG00000033420	1.4018	0.000615093	0.0263136	27.6569	9.89778
Arhgap9	ENSMUSG00000040345	-2.13533	0.000616572	0.0263152	1.98409	32.991
Tgfb3	ENSMUSG00000021253	1.65199	0.000620057	0.0264023	88.1221	26.3255
Epha4	ENSMUSG00000026235	-1.68869	0.000626224	0.0265238	18.3121	88.4332
NA	ENSMUSG00000085071	2.78809	0.000626829	0.0265238	2.05562	0.172246
NA	ENSMUSG00000099947	-2.4414	0.000627266	0.0265238	1.06024	21.2852
Zfp839	ENSMUSG00000021271	1.77793	0.000630761	0.0265913	143.966	47.8001
Hip1	ENSMUSG00000039959	1.57661	0.000631774	0.0265913	138.76	43.3444
Klhl14	ENSMUSG00000042514	2.79275	0.000645286	0.0269998	0.705701	0.039408
Tmem18	ENSMUSG00000043061	-2.01662	0.00064401	0.0269998	1.16954	13.7886
NA	ENSMUSG00000095690	2.05678	0.000645915	0.0269998	159.837	51.0722
Plec	ENSMUSG00000022565	1.69114	0.000649522	0.0270269	1233.65	417.538
Prr12	ENSMUSG00000046574	1.76225	0.00064807	0.0270269	177.726	58.3829
Ccdc17	ENSMUSG00000034035	-1.77125	0.000654408	0.0270454	6.17946	21.3112
Usp35	ENSMUSG00000035713	1.96709	0.000652221	0.0270454	37.4076	13.034
NA	ENSMUSG00000086732	2.10315	0.000653871	0.0270454	25.3115	5.90299
Enah	ENSMUSG00000022995	1.57388	0.000658681	0.0270908	2637.15	947.038
NA	ENSMUSG00000065870	2.80008	0.000659415	0.0270908	119.132	4.87372
NA	ENSMUSG00000095895	1.9181	0.000659955	0.0270908	149.722	44.1534
Bnc2	ENSMUSG00000028487	2.03461	0.000663471	0.027174	22.3688	6.41916
Sar1b	ENSMUSG00000020386	-2.23602	0.00066506	0.0271782	1.52513	53.2417
Elf4	ENSMUSG00000031103	1.16002	0.000667229	0.027206	193.846	83.3003
Zbtb7b	ENSMUSG00000028042	1.75735	0.000674218	0.0273688	217.195	74.2479
Fam214b	ENSMUSG00000036002	1.31141	0.000673011	0.0273688	468.044	189.127
NA	ENSMUSG00000032387	1.4259	0.000679494	0.0274609	405.032	149.698
Bcl9l	ENSMUSG00000063382	1.7741	0.000678126	0.0274609	512.189	175.854
NA	ENSMUSG00000098889	-1.75891	0.000683723	0.0275708	8.62835	39.347
Nr2e1	ENSMUSG00000019803	2.13494	0.000686183	0.0276091	7.46706	1.89157
Cbx6	ENSMUSG00000089715	1.42194	0.000694063	0.0278647	48.8118	18.6021
Bmp1	ENSMUSG00000022098	1.57237	0.000698782	0.0278704	564.71	197.697
Efhd2	ENSMUSG00000040659	2.14791	0.000696008	0.0278704	62.0135	16.06
NA	ENSMUSG00000101066	2.37204	0.00069734	0.0278704	12.176	2.09916
Mast3	ENSMUSG00000031833	1.72324	0.000703478	0.0279966	57.3774	18.2898
Arhgef17	ENSMUSG00000032875	1.66982	0.000710963	0.0280965	82.5817	27.4649
Foxc2	ENSMUSG00000046714	2.68088	0.00071214	0.0280965	3.64008	0.321848
NA	ENSMUSG00000063254	-2.27647	0.000708552	0.0280965	#VALUE!	#VALUE!
NA	ENSMUSG00000098206	-2.15509	0.000711021	0.0280965	0.980467	4.53977
NA	ENSMUSG00000065750	2.3394	0.000714272	0.0281199	80.5472	13.9905
Scube1	ENSMUSG00000016763	-2.48374	0.000717952	0.0281434	0.193457	1.76202
NA	ENSMUSG00000088938	-2.61595	0.00071668	0.0281434	1.77567	53.1609
Slc25a47	ENSMUSG00000048856	1.908	0.000725092	0.0283166	39.9881	11.3156
NA	ENSMUSG00000080971	-2.72637	0.00072547	0.0283166	0.159744	4.40027
Cyb5a	ENSMUSG00000024646	-2.30969	0.000728297	0.0283663	0.59565	12.0591
Sord	ENSMUSG00000027227	-1.76591	0.000731501	0.0284305	8.13819	28.1505
Bco1	ENSMUSG00000031845	2.50177	0.000735166	0.0284788	4.25181	0.684335
Camk2n1	ENSMUSG00000046447	2.01283	0.000735862	0.0284788	21.0225	4.68722
Catsperg1	ENSMUSG00000049676	1.99829	0.000738132	0.0285062	4.23206	1.01135
Drp2	ENSMUSG00000000223	1.80222	0.00074153	0.028517	2.96634	0.742189
NA	ENSMUSG00000088901	-2.68557	0.000741532	0.028517	2.40295	62.5428
Sfr1	ENSMUSG00000025066	1.62877	0.000743762	0.0285427	155.192	55.8292
Uchl1	ENSMUSG00000029223	2.15915	0.000745877	0.0285638	325.75	45.4533
Mul1	ENSMUSG00000041241	-1.4163	0.000751137	0.0286154	12.8291	44.1322
NA	ENSMUSG00000082432	2.73131	0.00075349	0.0286154	1.80123	0.10217
NA	ENSMUSG00000086105	1.83678	0.000751432	0.0286154	125.939	40.3748
NA	ENSMUSG00000100602	-2.49619	0.00075223	0.0286154	2.12415	40.2969
Tnrc18	ENSMUSG00000039477	1.6743	0.00075718	0.0286959	228.671	81.164
Nmt2	ENSMUSG00000026643	0.981803	0.000764126	0.0288186	158.92	78.3067
Gucy1b3	ENSMUSG00000028005	1.46249	0.00076202	0.0288186	20.11	6.29764
Mrps35	ENSMUSG00000040112	-1.55613	0.000765151	0.0288186	18.6336	53.2691
Alx4	ENSMUSG00000040310	2.18772	0.000773433	0.0290706	3.09268	0.40979
Best3	ENSMUSG00000020169	1.65771	0.000798976	0.0292854	640.098	233.012
Lmna	ENSMUSG00000028063	1.11056	0.00079999	0.0292854	248.111	118.206
Hivep3	ENSMUSG00000028634	1.69226	0.00079048	0.0292854	263.776	86.2209
Inppl1	ENSMUSG00000032737	1.55242	0.000793587	0.0292854	894.643	352.228
Limch1	ENSMUSG00000037736	1.48645	0.00079798	0.0292854	2626.92	1043.6
Orai2	ENSMUSG00000039747	2.63001	0.000792279	0.0292854	3.79446	0.45562
Ppp1r13l	ENSMUSG00000040734	1.45951	0.000781586	0.0292854	310.017	124.17
Myof	ENSMUSG00000048612	1.21329	0.000795661	0.0292854	26.3896	11.9886
Olfr394	ENSMUSG00000056921	2.75337	0.000787237	0.0292854	3.29945	0.30925
NA	ENSMUSG00000058126	1.73872	0.000797924	0.0292854	316.162	103.492
Numbl	ENSMUSG00000063160	1.54291	0.0007834	0.0292854	26.74	9.18293
NA	ENSMUSG00000097187	2.04479	0.000797667	0.0292854	297.014	68.3044
NA	ENSMUSG00000102095	-2.36813	0.000791459	0.0292854	0.420934	7.3253
Pou1f1	ENSMUSG00000004842	2.56422	0.000802508	0.0293188	3.91558	0.170997
Igf1r	ENSMUSG00000005533	1.08735	0.000811068	0.0293362	286.145	126.426
Phox2b	ENSMUSG00000012520	2.57317	0.000813995	0.0293362	7.08365	0.547725
Ehmt2	ENSMUSG00000013787	1.53326	0.000808923	0.0293362	310.144	120.303
Myo1c	ENSMUSG00000017774	1.25091	0.000812801	0.0293362	398.202	167.234
Acsl1	ENSMUSG00000018796	-1.10574	0.000818548	0.0293362	201.987	447.046
Thap7	ENSMUSG00000022760	2.13439	0.000811847	0.0293362	96.919	33.6457
Tmem98	ENSMUSG00000035413	-2.22062	0.000817366	0.0293362	1.08689	12.6128
NA	ENSMUSG00000081891	2.65927	0.000814456	0.0293362	10.4284	0.613792
NA	ENSMUSG00000092495	-2.24566	0.000808904	0.0293362	5.43231	63.2587
NA	ENSMUSG00000098404	1.51114	0.000819042	0.0293362	825.119	283.055
Zfp579	ENSMUSG00000051550	1.76669	0.000821505	0.0293668	208.924	64.0875
Gpr151	ENSMUSG00000042816	-2.50284	0.000823311	0.0293739	0.297024	6.34156
Psph	ENSMUSG00000029446	-1.93719	0.000833149	0.0296669	4.82116	23.5723
Mllt4	ENSMUSG00000068036	1.21354	0.000840671	0.0298765	734.932	322.165
Nes	ENSMUSG00000004891	1.80389	0.000854427	0.0303064	129.497	31.9929
Zswim4	ENSMUSG00000035671	1.4481	0.000874114	0.030912	161.036	65.481
Ell	ENSMUSG00000070002	1.57689	0.000874884	0.030912	581.566	220.288
Kmt2b	ENSMUSG00000006307	1.35964	0.000878017	0.0309628	333.732	136.3
Soga1	ENSMUSG00000055485	1.50676	0.000879746	0.030964	62.5958	24.3464
NA	ENSMUSG00000048600	1.78774	0.000884217	0.0310615	74.9869	20.662
Rpl3l	ENSMUSG00000002500	-0.987491	0.000902986	0.0314787	201.175	403.044
Scrib	ENSMUSG00000022568	1.76499	0.000902794	0.0314787	159.211	59.6613
Adora1	ENSMUSG00000042429	1.8344	0.000902521	0.0314787	284.101	75.5873
Pprc1	ENSMUSG00000055491	1.42839	0.000899168	0.0314787	335.725	136.385
Acsl6	ENSMUSG00000020333	-1.2669	0.000926711	0.0316415	9.27735	26.6586
Nampt	ENSMUSG00000020572	-1.7637	0.000914874	0.0316415	33.6636	175.081
Evl	ENSMUSG00000021262	2.01671	0.000914964	0.0316415	76.2578	24.2311
Mt2	ENSMUSG00000031762	2.15554	0.000925804	0.0316415	508.957	97.0958
Tpm1	ENSMUSG00000032366	1.52343	0.000924561	0.0316415	14769.9	5724.19
Tgfb2	ENSMUSG00000039239	1.07996	0.000912614	0.0316415	460.287	204.877
Megf9	ENSMUSG00000039270	2.14354	0.000925937	0.0316415	16.53	5.88772
Fbrs	ENSMUSG00000042423	1.27907	0.000919464	0.0316415	425.085	189.504
Trrap	ENSMUSG00000045482	1.54526	0.000926569	0.0316415	794.415	309.806
Kalrn	ENSMUSG00000061751	1.64527	0.000917221	0.0316415	459.747	158.181
LOC101056138	ENSMUSG00000093482	-1.8077	0.000914758	0.0316415	23.8266	130.745
Dnajc25	ENSMUSG00000070972	-1.50474	0.000930606	0.0317153	24.1719	81.3684
Peg3	ENSMUSG00000002265	1.69663	0.000947484	0.0320964	354.832	109.186
Ccdc127	ENSMUSG00000021578	-1.27264	0.000950395	0.0320964	19.5777	51.7107
Pdcd6ip	ENSMUSG00000032504	0.933736	0.000950575	0.0320964	339.775	182.722
1110059E24Rik	ENSMUSG00000035171	-1.6359	0.000947772	0.0320964	4.46203	21.5916
NA	ENSMUSG00000086409	-2.12847	0.000949561	0.0320964	5.27329	55.6887
Phf21b	ENSMUSG00000016624	2.23394	0.000952341	0.0320967	48.3659	10.7714
Fam228b	ENSMUSG00000050545	-2.10427	0.000954454	0.0321087	0.489134	13.9519
NA	ENSMUSG00000026238	1.72723	0.000961924	0.0321102	313.988	94.9308
C130074G19Rik	ENSMUSG00000039349	2.44632	0.000956666	0.0321102	4.6455	1.19797
NA	ENSMUSG00000089625	1.62611	0.00096019	0.0321102	5944.01	2170.22
Flt3l	ENSMUSG00000089989	0.959353	0.000958046	0.0321102	87.5263	44.2912
NA	ENSMUSG00000101958	2.49078	0.000963289	0.0321102	4.09815	0.668705
Crtc1	ENSMUSG00000003575	1.59914	0.000974923	0.0324172	126.442	50.6097
Cdr2l	ENSMUSG00000050910	1.86764	0.000976049	0.0324172	34.8893	12.3449
Dot1l	ENSMUSG00000061589	1.63486	0.000984647	0.0326435	1746.34	651.277
Dcaf12l2	ENSMUSG00000050926	2.3816	0.000992469	0.0328432	3.77362	0.749354
Pdzrn3	ENSMUSG00000035357	1.60885	0.000996222	0.0328483	400.661	136.616
Plekhg2	ENSMUSG00000037552	1.66985	0.00099448	0.0328483	170.79	52.2921
Clcf1	ENSMUSG00000040663	1.62786	0.000999894	0.0328508	86.7214	29.8001
NA	ENSMUSG00000087541	-2.05279	0.000998202	0.0328508	1.05993	28.6918
Dbh	ENSMUSG00000000889	-2.02988	0.00100545	0.0329741	0.935978	10.2959
Mrpl57	ENSMUSG00000021967	1.89926	0.00100772	0.0329892	30.1575	10.0625
Fcer2a	ENSMUSG00000005540	-2.1707	0.00101332	0.0331134	0.637368	6.141
Gpcpd1	ENSMUSG00000027346	-1.7598	0.00102714	0.0334451	101.712	515.978
NA	ENSMUSG00000089235	1.48493	0.00102642	0.0334451	7633.69	3025.49
Nr1h2	ENSMUSG00000060601	1.2874	0.00102901	0.0334463	446.108	180.525
Idh2	ENSMUSG00000030541	-1.04743	0.00103656	0.0335428	200.888	438.234
Otoa	ENSMUSG00000034990	2.57056	0.00103654	0.0335428	4.32858	0.193095
Ccser1	ENSMUSG00000039578	1.66468	0.00103748	0.0335428	15.4569	5.17605
Fn3k	ENSMUSG00000025175	-1.59739	0.00104237	0.0336414	11.7887	42.8617
Ncln	ENSMUSG00000020238	0.971978	0.00104817	0.0336501	192.753	96.7166
Stk32a	ENSMUSG00000039954	1.93211	0.00104803	0.0336501	6.28889	1.22626
Samd1	ENSMUSG00000079003	1.68675	0.00104476	0.0336501	92.292	28.9146
Foxj2	ENSMUSG00000003154	1.36234	0.00106332	0.0336633	299.455	124.997
Mbd2	ENSMUSG00000024513	1.18316	0.00105059	0.0336633	203.481	90.368
Loxl4	ENSMUSG00000025185	1.12183	0.00105419	0.0336633	31.782	14.7099
Smad7	ENSMUSG00000025880	1.42709	0.0010608	0.0336633	332.645	130.424
Ppm1l	ENSMUSG00000027784	-1.37198	0.00106275	0.0336633	5.06798	14.8435
Ociad1	ENSMUSG00000029152	-1.25014	0.00106047	0.0336633	71.7595	182.602
Mast4	ENSMUSG00000034751	1.56796	0.00106165	0.0336633	572.104	235.269
Nav2	ENSMUSG00000052512	1.5496	0.00105655	0.0336633	1725.26	670.246
Lamc1	ENSMUSG00000026478	1.0758	0.00107139	0.0337434	424.504	208.048
Exosc3	ENSMUSG00000028322	-2.16396	0.00107089	0.0337434	1.10892	12.8205
Inpp5j	ENSMUSG00000034570	1.25035	0.00106848	0.0337434	832.166	355.004
NA	ENSMUSG00000020485	-2.05737	0.00107971	0.0337504	4.12562	52.9383
1700017B05Rik	ENSMUSG00000032300	1.78692	0.00107476	0.0337504	31.8604	10.4064
Ptprf	ENSMUSG00000033295	1.67091	0.00108732	0.0337504	244.973	71.7873
Traf3ip1	ENSMUSG00000034292	1.87758	0.0010853	0.0337504	461.627	144.794
Srrm2	ENSMUSG00000039218	1.52324	0.00108556	0.0337504	7190.35	2600.15
Frmd3	ENSMUSG00000049122	2.43949	0.00107828	0.0337504	1.89012	0.0986565
NA	ENSMUSG00000064519	-2.56865	0.0010876	0.0337504	1.52138	44.9419
NA	ENSMUSG00000083935	-1.95122	0.00108825	0.0337504	7.05026	93.2991
NA	ENSMUSG00000097900	-0.873976	0.00108482	0.0337504	202.042	385.689
Gpr56	ENSMUSG00000031785	1.87636	0.0010981	0.0339407	20.1009	5.35909
Atxn2l	ENSMUSG00000032637	1.09334	0.00109739	0.0339407	2143.16	959.431
Mknk2	ENSMUSG00000020190	1.47587	0.00110744	0.0340325	303.236	122.119
Hemk1	ENSMUSG00000032579	-1.20087	0.00110916	0.0340325	25.7524	64.2799
NA	ENSMUSG00000038845	-1.49753	0.0011067	0.0340325	38.4677	126.436
Rpgrip1	ENSMUSG00000057132	1.88853	0.00111038	0.0340325	10.1943	3.63707
NA	ENSMUSG00000092344	-2.57457	0.00110539	0.0340325	0.825074	15.8477
4930444P10Rik	ENSMUSG00000067795	2.42602	0.00111291	0.0340529	4.09567	0.729617
Grk4	ENSMUSG00000052783	1.6342	0.00112643	0.0343515	128.847	45.9205
NA	ENSMUSG00000093380	-2.46776	0.00112595	0.0343515	0.488147	35.4012
Csrnp1	ENSMUSG00000032515	1.33715	0.00113029	0.0344117	207.579	79.7562
Clu	ENSMUSG00000022037	0.975678	0.00113923	0.0345114	764.118	390.667
Src	ENSMUSG00000027646	2.23739	0.00113844	0.0345114	12.4678	2.48293
NA	ENSMUSG00000100620	-2.61707	0.00113685	0.0345114	0.194256	8.11107
F730043M19Rik	ENSMUSG00000052125	2.13348	0.00114961	0.034768	26.525	7.03903
Ifitm10	ENSMUSG00000045777	1.69714	0.00115631	0.034913	24.4674	6.75731
NA	ENSMUSG00000065431	-2.49319	0.00116823	0.0352139	4.87901	100.988
NA	ENSMUSG00000089129	-2.03959	0.00117013	0.0352139	3.93635	78.1283
Kdm6b	ENSMUSG00000018476	1.52298	0.00117296	0.0352315	501.994	205.752
Arhgef37	ENSMUSG00000045094	1.75057	0.00117622	0.0352315	105.937	38.6446
Gpr87	ENSMUSG00000051431	-2.59097	0.0011765	0.0352315	0.0998412	1.99887
Tpm3	ENSMUSG00000027940	1.54413	0.0011824	0.03535	512.108	202.329
Abi3bp	ENSMUSG00000035258	1.30809	0.0011856	0.0353879	53.5921	20.7207
Prkcd	ENSMUSG00000021948	1.49529	0.00119491	0.0356076	233.582	84.6933
Gpx3	ENSMUSG00000018339	1.07542	0.00119692	0.0356094	515.589	249.025
NA	ENSMUSG00000082348	2.07858	0.00119895	0.0356119	54.651	17.3086
Arid5b	ENSMUSG00000019947	1.23501	0.00120881	0.0356941	460.002	173.933
Car8	ENSMUSG00000041261	-2.33567	0.00120954	0.0356941	0.292637	3.45424
Tnnt1	ENSMUSG00000064179	1.94895	0.00120627	0.0356941	117.981	31.0557
NA	ENSMUSG00000065336	-2.38282	0.00120535	0.0356941	2.88348	76.4451
Xirp1	ENSMUSG00000079243	1.60606	0.00121329	0.0357469	2227.83	769.495
Gas8	ENSMUSG00000040220	1.72052	0.00121632	0.0357788	92.1343	24.3612
Pbxip1	ENSMUSG00000042613	1.61055	0.00121876	0.0357926	400.808	157.723
NA	ENSMUSG00000048603	2.23268	0.00122315	0.0358639	7.31672	1.86088
Hes7	ENSMUSG00000023781	1.90311	0.00122968	0.0359976	38.6174	7.63393
Ackr4	ENSMUSG00000079355	-1.60489	0.00123201	0.0360082	26.6458	110.239
Sdcbp	ENSMUSG00000028249	-1.12975	0.00124442	0.0361954	80.6345	196.031
Fbrsl1	ENSMUSG00000043323	1.67239	0.00124555	0.0361954	778.749	302.48
Zfp36	ENSMUSG00000044786	1.67307	0.00124163	0.0361954	545.305	176.747
4930481A15Rik	ENSMUSG00000086938	-1.3266	0.00124634	0.0361954	24.2538	61.5793
4932431P20Rik	ENSMUSG00000074224	2.05582	0.00124949	0.0362293	5.18719	1.90187
Synj1	ENSMUSG00000022973	1.49022	0.00125208	0.0362468	391.872	154.314
NA	ENSMUSG00000080824	-2.60069	0.00125871	0.0363812	0.657969	14.8681
NA	ENSMUSG00000047347	1.61678	0.00126618	0.0365392	23.182	8.24355
Scnn1a	ENSMUSG00000030340	2.02417	0.00127286	0.0366219	7.05534	1.38638
Lrp1b	ENSMUSG00000049252	-1.84456	0.00127306	0.0366219	0.627209	2.87752
Slc9a1	ENSMUSG00000028854	1.67796	0.00127757	0.036694	407.999	142.691
AY512931	ENSMUSG00000066158	2.34626	0.00128119	0.0367402	4.29072	0.373411
Alpk3	ENSMUSG00000038763	1.6812	0.00128785	0.0368733	4182.56	1628.99
Usp8	ENSMUSG00000027363	1.56343	0.00129218	0.0368989	671.94	269.479
Pxn	ENSMUSG00000029528	1.512	0.00129278	0.0368989	1576.54	667.917
NA	ENSMUSG00000100981	2.56585	0.00129532	0.0369137	5.02714	0.439437
Troap	ENSMUSG00000032783	2.45141	0.00129962	0.0369784	9.64775	0.725653
Anxa2	ENSMUSG00000032231	1.26373	0.001303	0.0370028	210.542	84.0595
Ldlrad3	ENSMUSG00000048058	1.42094	0.00130453	0.0370028	57.0835	20.1301
Abcd2	ENSMUSG00000055782	-2.09052	0.00130846	0.0370569	0.446263	3.64297
Olfr288	ENSMUSG00000075427	-2.63628	0.00131745	0.0372536	0.096735	2.74756
Pla2g2f	ENSMUSG00000028749	-2.62287	0.00132082	0.0372911	0.0619504	1.10792
Ptpn23	ENSMUSG00000036057	1.28123	0.00132437	0.0373337	310.652	137.436
Gm5067	ENSMUSG00000090671	2.00445	0.00132977	0.0374282	167.173	51.8083
Ncor2	ENSMUSG00000029478	1.64117	0.00134396	0.0377113	762.159	288.379
Nrxn3	ENSMUSG00000066392	2.01626	0.00134203	0.0377113	12.5302	4.28607
Tgm2	ENSMUSG00000037820	1.27047	0.00135252	0.0378933	1085.48	451.971
Med25	ENSMUSG00000002968	1.78128	0.00135588	0.0379294	301.972	107.376
NA	ENSMUSG00000097401	2.28486	0.00136307	0.0380721	19.5887	3.55233
Sec22c	ENSMUSG00000061536	1.99928	0.00138534	0.0386352	14.347	4.94834
Vdac1	ENSMUSG00000020402	-0.947351	0.00139319	0.0387824	182.731	351.734
Abcc9	ENSMUSG00000030249	-1.12685	0.00139487	0.0387824	188.287	412.817
Col11a1	ENSMUSG00000027966	1.88685	0.00140367	0.0389354	10.4818	2.42307
Sorbs2os	ENSMUSG00000085440	-1.67074	0.00140463	0.0389354	152.341	494.039
Rin3	ENSMUSG00000044456	1.88456	0.00140937	0.0390019	118.461	29.3406
Tmem123	ENSMUSG00000050912	-2.02827	0.0014113	0.0390019	1.16071	25.4361
Ttc16	ENSMUSG00000039021	2.07217	0.00141714	0.039104	10.4023	3.41739
B4galt5	ENSMUSG00000017929	1.20074	0.00142452	0.0392483	134.012	54.3845
NA	ENSMUSG00000081583	1.7742	0.00144534	0.0397622	3438.74	1055.22
Ascc2	ENSMUSG00000020412	1.41161	0.00145187	0.0398817	354.034	143.829
Ak3	ENSMUSG00000024782	-1.15999	0.00145424	0.0398867	97.5277	212.766
Arhgap17	ENSMUSG00000030766	1.82627	0.00145792	0.0399278	278.914	84.0837
Aebp2	ENSMUSG00000030232	1.34421	0.00146312	0.0400102	185.988	80.4399
Atp6v1g2	ENSMUSG00000024403	1.60434	0.00146796	0.0400409	78.8656	29.8904
Abhd10	ENSMUSG00000033157	-2.20464	0.0014711	0.0400409	0.338898	13.4378
Mrgprh	ENSMUSG00000059408	-2.27603	0.0014717	0.0400409	0.349492	15.9599
NA	ENSMUSG00000084744	1.9358	0.00147301	0.0400409	161.367	35.9831
Slc22a4	ENSMUSG00000020334	1.09327	0.00147637	0.0400726	443.701	209.611
Mapt	ENSMUSG00000018411	1.19548	0.00148439	0.0401709	486.759	221.67
NA	ENSMUSG00000101224	-2.58025	0.00148336	0.0401709	0.348158	5.24657
Bak1	ENSMUSG00000057789	1.22165	0.00148712	0.0401853	197.777	91.5372
Btbd2	ENSMUSG00000003344	1.29467	0.00151132	0.040241	61.7699	26.6185
Zmiz1	ENSMUSG00000007817	1.43341	0.00152579	0.040241	467.917	196.858
Vmp1	ENSMUSG00000018171	0.828601	0.00152055	0.040241	209.649	118.221
39692	ENSMUSG00000018398	1.50577	0.00152884	0.040241	520.657	194
Acin1	ENSMUSG00000022185	1.68061	0.00151436	0.040241	1559.9	574.652
Rfng	ENSMUSG00000025158	1.54171	0.00149475	0.040241	158.599	57.5893
Smarcc2	ENSMUSG00000025369	1.51215	0.0015201	0.040241	1197.77	479.976
Wdr66	ENSMUSG00000029442	2.12027	0.00152368	0.040241	19.1876	8.33726
R3hcc1	ENSMUSG00000034194	1.63683	0.00150571	0.040241	152.319	59.9028
Arhgap33	ENSMUSG00000036882	2.23196	0.00149301	0.040241	27.1218	5.46503
Sart1	ENSMUSG00000039148	1.4688	0.00152579	0.040241	137.2	54.0286
Hirip3	ENSMUSG00000042606	1.79165	0.00151829	0.040241	177.034	64.5423
Cyb5r2	ENSMUSG00000048065	-1.71746	0.0015076	0.040241	20.3605	57.9732
NA	ENSMUSG00000086712	-2.18236	0.00151107	0.040241	0.341406	6.27464
NA	ENSMUSG00000089475	-1.9624	0.00152677	0.040241	8.7256	108.395
NA	ENSMUSG00000089643	2.39052	0.00150192	0.040241	29.5283	2.87831
0610040B10Rik	ENSMUSG00000089889	-2.1461	0.00151515	0.040241	0.464082	8.35093
NA	ENSMUSG00000101107	2.08468	0.00152027	0.040241	33.6123	7.92581
Gga1	ENSMUSG00000033128	1.35617	0.00153825	0.0404304	262.987	109.882
Las1l	ENSMUSG00000057421	1.73355	0.00154959	0.04067	581.176	237.202
Pah	ENSMUSG00000020051	-1.86142	0.00155749	0.0407307	3.01355	16.0343
Ppp2r2c	ENSMUSG00000029120	-1.97256	0.00156024	0.0407307	0.265939	2.18459
Pzp	ENSMUSG00000030359	-1.72404	0.00156204	0.0407307	4.73008	20.2665
Rab11fip3	ENSMUSG00000037098	1.40754	0.00156138	0.0407307	420.026	171.238
NA	ENSMUSG00000044694	-1.53584	0.00156346	0.0407307	12.0145	45.9366
NA	ENSMUSG00000077059	2.42738	0.00156528	0.0407307	67.8684	8.64008
Txn2	ENSMUSG00000005354	-1.10657	0.00157311	0.0408183	74.1265	178.714
NA	ENSMUSG00000083857	2.485	0.00157155	0.0408183	4.56282	1.21757
Phc1	ENSMUSG00000040669	1.87101	0.00157606	0.0408366	147.296	51.88
Zbtb4	ENSMUSG00000018750	1.45967	0.00158567	0.0409903	111.98	45.1224
Kdm8	ENSMUSG00000030752	-2.2298	0.00158647	0.0409903	0.205017	6.67031
Pex5l	ENSMUSG00000027674	1.52956	0.0015919	0.0410724	8.54607	2.95271
NA	ENSMUSG00000077563	1.84891	0.00159474	0.0410876	734.899	271.391
Mzb1	ENSMUSG00000024353	-1.94354	0.00159973	0.0411022	2.17596	28.5202
Actb	ENSMUSG00000029580	0.830314	0.00160656	0.0411022	1842.64	1037.49
Ppp1r18	ENSMUSG00000034595	1.45142	0.00160431	0.0411022	57.3315	17.2485
Gpr171	ENSMUSG00000050075	-1.92973	0.00160224	0.0411022	2.02577	35.3708
NA	ENSMUSG00000100595	-2.00019	0.00160437	0.0411022	1.14921	11.2949
Ksr1	ENSMUSG00000018334	1.89358	0.0016169	0.0411373	37.7214	8.90877
Cobl	ENSMUSG00000020173	1.48377	0.00161569	0.0411373	29.2589	10.1345
Mad1l1	ENSMUSG00000029554	1.60621	0.00161801	0.0411373	121.174	40.7972
Tspan9	ENSMUSG00000030352	1.32942	0.00161919	0.0411373	202.375	86.9401
Gm12504	ENSMUSG00000084274	1.57746	0.0016142	0.0411373	56.0865	12.8489
Spen	ENSMUSG00000040761	1.65913	0.00162391	0.0411428	370.491	147.718
NA	ENSMUSG00000072847	-1.46383	0.00162297	0.0411428	4.07502	11.9618
Tyk2	ENSMUSG00000032175	1.44015	0.00163072	0.041258	95.4076	37.2095
Dab2ip	ENSMUSG00000026883	1.38138	0.00164085	0.041457	210.438	83.9267
Flii	ENSMUSG00000002812	1.13467	0.00165817	0.0415683	623.579	294.628
Arpc5	ENSMUSG00000008475	1.64739	0.00165595	0.0415683	148.01	58.7336
Lsp1	ENSMUSG00000018819	1.59624	0.00165278	0.0415683	288.825	106.757
Speg	ENSMUSG00000026207	1.56625	0.00165342	0.0415683	2510.71	1026.69
Jdp2	ENSMUSG00000034271	1.86829	0.00165468	0.0415683	46.3214	14.5837
Sox13	ENSMUSG00000070643	2.0838	0.00165891	0.0415683	30.1661	13.1193
Cyr61	ENSMUSG00000028195	1.13448	0.00166882	0.0417594	1654.05	799.853
Zc3h13	ENSMUSG00000022000	1.761	0.00167491	0.0418543	825.749	276.241
NA	ENSMUSG00000082127	2.24071	0.00167887	0.0418962	84.9013	8.01404
Tead3	ENSMUSG00000002249	1.58092	0.00168384	0.0419218	660.827	235.036
Zfp335	ENSMUSG00000039834	1.59579	0.00168449	0.0419218	619.422	256.598
Cpn2	ENSMUSG00000023176	-1.37144	0.00168962	0.0419922	12.8476	41.7521
Nfatc2	ENSMUSG00000027544	1.26859	0.00169331	0.0420269	754.735	294.398
Tchp	ENSMUSG00000002486	1.42764	0.00170046	0.0420328	93.6535	38.7658
Fchsd1	ENSMUSG00000038524	2.17962	0.00170015	0.0420328	24.4949	6.97354
NA	ENSMUSG00000098424	-2.54701	0.00169906	0.0420328	0.292309	6.42559
Plekha4	ENSMUSG00000040428	2.02799	0.00171254	0.0422744	23.6814	8.55936
Amacr	ENSMUSG00000022244	-1.63595	0.00172274	0.0423544	1.69419	15.3889
Arl6ip1	ENSMUSG00000030654	-2.13869	0.00172051	0.0423544	1.23163	11.4835
Mmp15	ENSMUSG00000031790	-1.34467	0.0017192	0.0423544	15.9177	50.8601
Gcm1	ENSMUSG00000023333	2.51444	0.00175939	0.0431457	2.73304	0.099549
Kmt2d	ENSMUSG00000048154	1.39102	0.00175965	0.0431457	817.427	337.745
NA	ENSMUSG00000065360	-2.33308	0.00176259	0.0431598	2.61198	74.4422
Amotl2	ENSMUSG00000032531	1.04125	0.00177539	0.043389	325.137	156.713
NA	ENSMUSG00000078984	2.28643	0.00177855	0.043389	66.2813	5.67796
NA	ENSMUSG00000083859	1.32179	0.00177907	0.043389	135.583	57.5668
Nus1	ENSMUSG00000023068	-1.07576	0.00178623	0.0433931	26.8289	58.5629
Nppa	ENSMUSG00000041616	1.09298	0.00178206	0.0433931	389.418	182.243
Pdcd7	ENSMUSG00000041837	1.34652	0.00179349	0.0433931	57.5129	23.6132
Gpr183	ENSMUSG00000051212	-1.41559	0.00179199	0.0433931	1.80388	11.5209
NA	ENSMUSG00000065594	-2.01789	0.00179331	0.0433931	5.25392	140.945
NA	ENSMUSG00000087006	2.18558	0.00179339	0.0433931	27.0755	6.56183
Cenpu	ENSMUSG00000031629	2.13713	0.00180363	0.0435523	8.89492	1.9051
Abca7	ENSMUSG00000035722	1.19947	0.00180484	0.0435523	136.062	61.1703
Heatr2	ENSMUSG00000025857	1.3713	0.00183067	0.0440591	69.5911	23.3973
Mir6236	ENSMUSG00000098973	1.91813	0.00183051	0.0440591	390880	97874.2
Eif5b	ENSMUSG00000026083	1.64237	0.00183892	0.0441994	584.025	215.234
Phldb1	ENSMUSG00000048537	1.66481	0.0018435	0.0442513	850.065	306.838
Tuba8	ENSMUSG00000030137	-1.0905	0.00185413	0.0444481	115.34	260.282
Obscn	ENSMUSG00000061462	1.62494	0.0018581	0.0444667	6396.12	2521.97
NA	ENSMUSG00000082872	1.49762	0.00185978	0.0444667	21.1182	7.2447
Ormdl1	ENSMUSG00000026097	-2.08078	0.00187022	0.0445068	0.638379	7.0106
Gm5113	ENSMUSG00000066647	-1.12704	0.00187043	0.0445068	9.16228	21.0143
Ccdc78	ENSMUSG00000071202	-1.74503	0.00186678	0.0445068	2.84219	12.8673
NA	ENSMUSG00000083465	-2.06832	0.0018712	0.0445068	1.16973	14.9726
Apc2	ENSMUSG00000020135	1.45312	0.00187389	0.0445127	61.8734	24.5437
Renbp	ENSMUSG00000031387	1.93981	0.00188514	0.0446973	8.32273	1.59225
Mybbp1a	ENSMUSG00000040463	1.18966	0.00188655	0.0446973	304.647	135.358
Sh3gl1	ENSMUSG00000003200	1.22521	0.00189573	0.0448126	264.85	117.192
A1bg	ENSMUSG00000022347	-1.60413	0.00189878	0.0448126	3.1319	13.6117
Irs1	ENSMUSG00000055980	1.54339	0.00189693	0.0448126	1032.47	408.266
U2af2	ENSMUSG00000030435	1.29727	0.00190622	0.0449302	555.805	236.125
Cul7	ENSMUSG00000038545	1.33994	0.00191383	0.0450514	89.7586	35.9066
Hps1	ENSMUSG00000025188	1.0427	0.00192191	0.0451254	37.4736	17.6496
NA	ENSMUSG00000095738	2.52978	0.00192125	0.0451254	32.0204	1.73724
B4galt2	ENSMUSG00000028541	1.98205	0.0019299	0.0451388	27.8068	7.31643
Lrrtm3	ENSMUSG00000042846	-1.37067	0.00192839	0.0451388	62.5272	197.278
NA	ENSMUSG00000084644	-2.21035	0.00192708	0.0451388	9.91611	170.124
Hlcs	ENSMUSG00000040820	1.98924	0.00193351	0.0451656	13.5053	5.00173
Tsc22d1	ENSMUSG00000022010	1.23349	0.00194299	0.0452711	335.171	144.581
Gm2382	ENSMUSG00000079427	-1.31569	0.00194112	0.0452711	20.5782	57.3253
P2rx7	ENSMUSG00000029468	1.97696	0.00194695	0.0453056	15.59	5.23515
Lrp3	ENSMUSG00000001802	1.68131	0.00197313	0.04537	47.9424	19.192
Fpgs	ENSMUSG00000009566	1.66619	0.00195379	0.04537	151.617	58.9337
Nuak1	ENSMUSG00000020032	1.29556	0.00199829	0.04537	535.879	230.98
Anxa8	ENSMUSG00000021950	2.53993	0.00198736	0.04537	1.22003	0.0905676
Hsp90ab1	ENSMUSG00000023944	1.5144	0.0019837	0.04537	2053.42	818.757
Rgs11	ENSMUSG00000024186	1.44975	0.00199296	0.04537	201.833	59.5997
Csf3r	ENSMUSG00000028859	2.19327	0.00196154	0.04537	6.37809	2.13934
Acsm5	ENSMUSG00000030972	-2.03452	0.00197386	0.04537	0.611005	8.17803
6430548M08Rik	ENSMUSG00000031824	1.47945	0.00198519	0.04537	90.3336	39.6221
Dbn1	ENSMUSG00000034675	2.10353	0.00199539	0.04537	38.4856	12.2772
Tmem214	ENSMUSG00000038828	0.950085	0.00199939	0.04537	142.539	75.1253
Man2a2	ENSMUSG00000038886	1.30698	0.00196735	0.04537	572.282	250.045
Tmtc4	ENSMUSG00000041594	-1.03979	0.0019874	0.04537	12.2081	26.9752
Immp1l	ENSMUSG00000042670	-1.76701	0.00198871	0.04537	5.5444	45.3973
Dusp18	ENSMUSG00000047205	-1.08466	0.00199626	0.04537	23.6119	53.7711
Gpn1	ENSMUSG00000064037	-1.43512	0.00197827	0.04537	7.679	28.9896
Gm10619	ENSMUSG00000074067	-2.1142	0.0019655	0.04537	0.70623	3.27664
NA	ENSMUSG00000086061	1.82687	0.00198506	0.04537	16.3468	4.03757
NA	ENSMUSG00000093779	-2.32161	0.0019653	0.04537	2.0528	32.3888
3300005D01Rik	ENSMUSG00000096965	2.27117	0.00198693	0.04537	7.66716	1.36284
Cebpb	ENSMUSG00000056501	1.7018	0.00200686	0.0454829	70.1633	25.3796
Sdhc	ENSMUSG00000058076	-1.16159	0.00201005	0.0454989	57.3907	129.691
Tssk2	ENSMUSG00000045521	-2.4507	0.00201257	0.0454996	0.372015	3.69386
Tln2	ENSMUSG00000052698	1.41931	0.00202043	0.0456207	316.726	129.667
Sf3a2	ENSMUSG00000020211	1.68276	0.00202834	0.0456864	88.4384	34.7039
NA	ENSMUSG00000097410	1.55119	0.00202744	0.0456864	16.0765	6.018
Ube2l6	ENSMUSG00000027078	-2.42916	0.00205004	0.0459894	0.218561	5.31278
Dhx38	ENSMUSG00000037993	1.48125	0.00204999	0.0459894	133.549	57.792
NA	ENSMUSG00000089743	-2.32698	0.00204807	0.0459894	0.396799	6.85881
9630001P10Rik	ENSMUSG00000097825	2.10404	0.00205186	0.0459894	7.5247	2.60923
Il15	ENSMUSG00000031712	-1.44932	0.00206003	0.0460972	16.9897	59.6894
Arhgef33	ENSMUSG00000054901	2.27295	0.00206172	0.0460972	7.08876	0.527452
Adamts10	ENSMUSG00000024299	1.21717	0.00206566	0.0461288	95.7828	43.0021
Plscr5	ENSMUSG00000095654	-1.9532	0.00206948	0.0461577	1.85358	23.5424
Lemd3	ENSMUSG00000048661	1.56766	0.00207671	0.0462625	88.9774	37.2184
3425401B19Rik	ENSMUSG00000071540	1.47605	0.00208038	0.0462878	1007.45	416.564
Pax6	ENSMUSG00000027168	1.60524	0.00208436	0.046303	9.19695	3.25754
Lins	ENSMUSG00000053091	-1.47114	0.00208613	0.046303	4.62266	19.1571
Ms4a7	ENSMUSG00000024672	1.84508	0.00210459	0.046408	7.27645	2.16928
Baiap2	ENSMUSG00000025372	1.58328	0.00209423	0.046408	51.7598	18.6753
BC028528	ENSMUSG00000038543	-1.92258	0.00210611	0.046408	2.30973	28.4074
Zfp598	ENSMUSG00000041130	1.55224	0.00209999	0.046408	432.878	179.847
Mansc4	ENSMUSG00000072662	-2.23012	0.00210071	0.046408	0.239842	5.23325
NA	ENSMUSG00000100119	2.25748	0.00210402	0.046408	5.07092	0.478641
Mtss1l	ENSMUSG00000033763	1.4349	0.00212096	0.0466791	357.03	143.727
Slc8b1	ENSMUSG00000032754	1.32363	0.0021236	0.0466808	49.5139	19.3215
2810055G20Rik	ENSMUSG00000090386	1.35272	0.00212633	0.0466847	1243.51	539.986
Rasal1	ENSMUSG00000029602	2.51094	0.0021316	0.0467208	1.36908	0.0689277
Maz	ENSMUSG00000030678	1.09737	0.00213309	0.0467208	148	70.5871
NA	ENSMUSG00000080780	-2.47507	0.00214817	0.0469947	0.348287	5.83476
Caskin1	ENSMUSG00000033597	2.15242	0.00215131	0.0470072	1.57294	0.187013
NA	ENSMUSG00000102018	1.98429	0.0021554	0.0470403	29.5335	5.16989
2900026A02Rik	ENSMUSG00000051339	1.25967	0.00216187	0.0471251	32.6496	12.2219
Ppm1j	ENSMUSG00000002228	1.4336	0.00217041	0.0471988	255.994	103.966
Ccrl2	ENSMUSG00000043953	-1.65068	0.00216891	0.0471988	1.31528	5.80096
Myo9b	ENSMUSG00000004677	1.08958	0.00217432	0.0472064	1734.79	836.764
Bpgm	ENSMUSG00000038871	-1.87349	0.00217593	0.0472064	0.830166	9.3646
Klf7	ENSMUSG00000025959	1.01512	0.00218364	0.0473173	175.784	83.1624
Man1c1	ENSMUSG00000037306	1.14791	0.00220252	0.0476134	342.09	153.681
NA	ENSMUSG00000045010	1.99865	0.00220095	0.0476134	10.9961	3.08074
Fam114a1	ENSMUSG00000029185	1.50668	0.00220534	0.0476182	66.3331	22.303
Eif4g3	ENSMUSG00000028760	1.24756	0.00221154	0.0476393	545.31	249.147
Upf1	ENSMUSG00000058301	0.926675	0.00221105	0.0476393	138.852	75.5682
Dpf1	ENSMUSG00000030584	2.46445	0.0022142	0.0476405	1.61345	0.111383
Grk5	ENSMUSG00000003228	1.21967	0.00222883	0.0477861	288.365	110.689
Hyi	ENSMUSG00000006395	1.31225	0.00223143	0.0477861	62.5575	21.2339
Vac14	ENSMUSG00000010936	1.06056	0.00222843	0.0477861	171.49	84.1581
Gm766	ENSMUSG00000048473	-2.45024	0.00222965	0.0477861	0.0462963	0.840945
Cux1	ENSMUSG00000029705	1.34854	0.00225256	0.0481258	632.317	282.835
Gypc	ENSMUSG00000090523	-1.33639	0.00225034	0.0481258	7.19765	23.5313
NA	ENSMUSG00000083924	-2.50151	0.00225594	0.0481417	0.25974	10.1081
Mink1	ENSMUSG00000020827	1.4924	0.00226736	0.0481637	386.598	167.218
Dpysl3	ENSMUSG00000024501	1.11092	0.00226752	0.0481637	91.545	38.942
Hgs	ENSMUSG00000025793	1.54244	0.00226002	0.0481637	98.6149	38.8034
Mettl21c	ENSMUSG00000047343	-1.98011	0.00226499	0.0481637	0.589179	17.901
NA	ENSMUSG00000088456	-1.66478	0.00228027	0.0483784	137.872	462.504
Fstl3	ENSMUSG00000020325	1.89238	0.00229582	0.0486516	16.2483	2.48497
Spib	ENSMUSG00000008193	1.19799	0.00232375	0.0489824	147.747	60.6528
Rusc2	ENSMUSG00000035969	1.29918	0.00232328	0.0489824	585.381	232.151
Ypel3	ENSMUSG00000042675	1.05267	0.00232058	0.0489824	198.984	90.7015
Ccdc57	ENSMUSG00000048445	1.68475	0.00232483	0.0489824	115.549	45.8966
NA	ENSMUSG00000094296	1.51908	0.00232398	0.0489824	123.638	45.3179
Zfhx3	ENSMUSG00000038872	1.51921	0.00232995	0.0490337	119.483	47.4504
Myo5a	ENSMUSG00000034593	1.08515	0.00233411	0.0490344	174.466	76.5871
NA	ENSMUSG00000093803	1.29007	0.00233535	0.0490344	1268.91	530.895
Timm17a	ENSMUSG00000062580	-1.0161	0.00234651	0.049212	43.4571	87.6095
Tiam1	ENSMUSG00000002489	1.47358	0.0023507	0.0492434	19.3423	7.60549
Leprel1	ENSMUSG00000038168	1.76064	0.00235669	0.0493123	34.6683	9.58871
NA	ENSMUSG00000059229	2.08642	0.00236318	0.0493916	10.7185	1.19742
Casz1	ENSMUSG00000028977	1.31702	0.00236742	0.0494237	857.944	379.548
Fam3a	ENSMUSG00000031399	1.28728	0.00237316	0.0494869	200.667	87.1579
Adamts20	ENSMUSG00000022449	1.16988	0.0023859	0.0496958	179.151	73.4884
Atp2a1	ENSMUSG00000030730	1.99683	0.00240516	0.0499313	6.03759	1.93769
Irf8	ENSMUSG00000041515	-2.03281	0.00240541	0.0499313	0.383567	3.8327
Atxn1l	ENSMUSG00000069895	1.16779	0.00240138	0.0499313	63.7201	25.5129
Csnk1e	ENSMUSG00000022433	1.35302	0.00241225	0.0499598	257.281	114.009
NA	ENSMUSG00000094456	2.40938	0.00241172	0.0499598	22.2016	3.91423
Serpinb1c	ENSMUSG00000079049	1.46134	0.00242282	0.050122	214.978	59.7365
Gm12992	ENSMUSG00000085667	1.86897	0.00242713	0.0501543	12.8902	4.24987
Tspan11	ENSMUSG00000030351	2.44605	0.00243793	0.0501705	1.03219	0.0870421
Micalcl	ENSMUSG00000030771	2.21846	0.0024389	0.0501705	13.8339	1.41693
Sema3b	ENSMUSG00000057969	1.48257	0.00243533	0.0501705	599.334	217.699
Rnu5g	ENSMUSG00000095892	2.47266	0.00243454	0.0501705	32.0204	1.73724
Ptpn13	ENSMUSG00000034573	1.33301	0.00244473	0.0502338	158.341	56.1461
Bahd1	ENSMUSG00000040007	1.57242	0.00244782	0.0502408	62.7529	19.9415
Zfhx2	ENSMUSG00000040721	1.57525	0.00245141	0.050258	100.497	36.4149
Psmc3	ENSMUSG00000002102	0.971879	0.00245677	0.0503115	298.051	148.828
NA	ENSMUSG00000095651	-1.93454	0.00245972	0.0503154	0.884338	10.3105
Atn1	ENSMUSG00000004263	1.30249	0.00246503	0.0503678	309.425	121.304
Adrbk2	ENSMUSG00000042249	0.974413	0.00247163	0.0504383	114.31	54.1089
NA	ENSMUSG00000083258	1.57712	0.00247401	0.0504383	100.455	33.6733
NA	ENSMUSG00000024274	-2.30445	0.00247897	0.0504695	0.526994	10.6661
Nupr1	ENSMUSG00000030717	1.95156	0.00248121	0.0504695	6.56046	1.72852
Myh14	ENSMUSG00000030739	1.57247	0.00248383	0.0504695	321.326	112.444
Chrna10	ENSMUSG00000066279	-1.19286	0.00251345	0.0509581	31.1844	82.7702
NA	ENSMUSG00000081995	-2.19176	0.00251074	0.0509581	0.817034	17.9415
Hdgfrp2	ENSMUSG00000002833	1.64545	0.002548	0.0510189	622.178	246.419
Hivep1	ENSMUSG00000021366	1.27728	0.00253052	0.0510189	279.07	130.232
Hdac7	ENSMUSG00000022475	1.57981	0.00254484	0.0510189	630.289	218.484
Scaf4	ENSMUSG00000022983	1.08806	0.00254068	0.0510189	809.289	391.928
Cpne3	ENSMUSG00000028228	-0.961804	0.002531	0.0510189	15.2872	31.1498
Unc13b	ENSMUSG00000028456	0.881052	0.002528	0.0510189	42.145	22.6278
Ghitm	ENSMUSG00000041028	-1.42638	0.00255116	0.0510189	16.655	55.5108
H2afv	ENSMUSG00000041126	-1.57686	0.00255478	0.0510189	6.54092	26.7103
Zmiz2	ENSMUSG00000041164	1.34649	0.00253508	0.0510189	330.64	146.755
NA	ENSMUSG00000045746	-2.26067	0.00253363	0.0510189	0.266227	6.58792
Fam110b	ENSMUSG00000049119	-1.48802	0.00253748	0.0510189	20.0717	60.5043
NA	ENSMUSG00000081666	1.44236	0.0025483	0.0510189	72.5108	27.0114
NA	ENSMUSG00000087377	-2.35875	0.00254818	0.0510189	0.350855	6.45539
NA	ENSMUSG00000099871	1.19724	0.00255556	0.0510189	770.343	321.852
Adam8	ENSMUSG00000025473	1.7119	0.00256751	0.0511467	19.4287	4.44056
Col7a1	ENSMUSG00000025650	1.90361	0.00257063	0.0511467	10.091	3.85405
Krt80	ENSMUSG00000037185	2.01849	0.00257457	0.0511467	33.6085	13.5583
AA986860	ENSMUSG00000042510	1.57231	0.00257595	0.0511467	12.1431	3.02347
Nlgn2	ENSMUSG00000051790	1.75914	0.00256809	0.0511467	28.7298	8.92704
NA	ENSMUSG00000095545	-1.65627	0.00259023	0.0513743	2.69907	15.4876
NA	ENSMUSG00000097864	-2.37017	0.00259886	0.0514895	0.616305	3.61871
NA	ENSMUSG00000059195	0.955477	0.0026246	0.0519433	3502.72	1884
NA	ENSMUSG00000082570	-1.79706	0.00262753	0.0519449	12.1899	46.3088
NA	ENSMUSG00000043889	0.974723	0.00263495	0.0520353	2101.06	1118.81
Tnks1bp1	ENSMUSG00000033955	1.71454	0.00264597	0.0521401	58.2807	18.1409
Tmem37	ENSMUSG00000050777	-2.36734	0.0026458	0.0521401	0.114159	1.89857
Dusp27	ENSMUSG00000026564	1.65887	0.00266431	0.0523545	502.66	175.113
Col4a2	ENSMUSG00000031503	1.25168	0.00266545	0.0523545	649.551	255.834
NA	ENSMUSG00000077863	1.8827	0.00266507	0.0523545	#VALUE!	#VALUE!
Eno2	ENSMUSG00000004267	1.42479	0.00268589	0.0524179	165.526	49.3933
Tspan17	ENSMUSG00000025875	1.38577	0.00268267	0.0524179	92.0909	34.3932
Nyap1	ENSMUSG00000045348	2.0291	0.00268459	0.0524179	20.8439	7.49083
Ppfia2	ENSMUSG00000053825	-1.97242	0.00268269	0.0524179	0.221735	2.18245
Timd4	ENSMUSG00000055546	-2.28151	0.00267453	0.0524179	0.121694	2.26785
Ube2u	ENSMUSG00000069733	2.15658	0.00268059	0.0524179	12.8914	3.07188
Ube2d1	ENSMUSG00000019927	-1.27706	0.00268941	0.0524306	31.2873	85.0486
Tacc2	ENSMUSG00000030852	1.67729	0.00270199	0.0525672	7993.84	2875.43
Ankrd11	ENSMUSG00000035569	1.54789	0.00270217	0.0525672	1597.76	630.126
Dnajc3	ENSMUSG00000022136	-1.12283	0.00271423	0.0526896	52.4488	123.794
Clcn6	ENSMUSG00000029016	0.835295	0.00271161	0.0526896	195.089	108.877
Ddx4	ENSMUSG00000021758	2.36781	0.00272208	0.0527299	2.084	0.379358
Aacs	ENSMUSG00000029482	1.32477	0.00272115	0.0527299	25.4474	10.419
Rbm12b1	ENSMUSG00000046667	-0.803219	0.00273035	0.0527781	109.729	197.871
Gm20748	ENSMUSG00000098098	-1.83794	0.0027284	0.0527781	12.1952	89.5123
NA	ENSMUSG00000083813	-2.23879	0.00274077	0.0529236	4.33473	26.1758
Pdap1	ENSMUSG00000029623	0.895507	0.00274462	0.052942	125.613	69.2281
App	ENSMUSG00000022892	1.37668	0.0027536	0.0530581	271.729	119.623
Vwa5b2	ENSMUSG00000046613	2.14683	0.00275645	0.0530581	2.45593	0.782268
Srsf11	ENSMUSG00000055436	1.40335	0.00276353	0.0531383	2622.27	1125.11
Slc2a12	ENSMUSG00000037490	-2.04011	0.0027671	0.053151	0.331022	14.0691
Acp2	ENSMUSG00000002103	-0.937335	0.00277124	0.0531746	28.7579	57.8596
NA	ENSMUSG00000046580	1.71641	0.00279396	0.0535542	173.921	60.2617
Plp1	ENSMUSG00000031425	1.35641	0.00280023	0.0536182	29.4324	11.9075
NA	ENSMUSG00000085884	-1.55716	0.00280361	0.0536268	15.2884	63.1095
Cd4	ENSMUSG00000023274	1.93529	0.00281082	0.0536788	6.40684	1.61139
Asb18	ENSMUSG00000067081	-1.11918	0.00281221	0.0536788	25.676	61.0885
Col1a1	ENSMUSG00000001506	1.12914	0.00282589	0.0536814	336.218	157.254
Ubxn2a	ENSMUSG00000020634	-0.893864	0.00282746	0.0536814	44.4113	84.6744
Cast	ENSMUSG00000021585	1.26668	0.00284288	0.0536814	837.424	350.595
Farp1	ENSMUSG00000025555	1.374	0.00283477	0.0536814	114.732	46.4921
Zfp7	ENSMUSG00000033669	1.24074	0.00283085	0.0536814	29.0327	11.6761
Rhox8	ENSMUSG00000064137	2.29994	0.00282218	0.0536814	7.18764	1.08926
NA	ENSMUSG00000080775	1.59581	0.00284083	0.0536814	88.5161	34.8582
NA	ENSMUSG00000089940	1.69965	0.00283686	0.0536814	3.17733	1.26681
NA	ENSMUSG00000095078	-1.48686	0.00284467	0.0536814	15.6408	49.3426
NA	ENSMUSG00000097577	-1.22242	0.00283571	0.0536814	30.4069	83.2711
NA	ENSMUSG00000097993	2.18869	0.00283729	0.0536814	4.32397	2.15256
Efcab2	ENSMUSG00000026495	-1.62202	0.00284777	0.0536844	9.56859	62.0548
Tnip1	ENSMUSG00000020400	1.43128	0.00287102	0.054057	313.959	137.403
Setd1b	ENSMUSG00000038384	1.36924	0.00287345	0.054057	243.65	107.6
Hr	ENSMUSG00000022096	1.48006	0.00287722	0.0540703	73.0444	22.6267
Gpr111	ENSMUSG00000057899	-1.78148	0.00288304	0.0540703	2.21778	15.7145
Klhl33	ENSMUSG00000090799	-1.87953	0.00288196	0.0540703	2.23653	19.3976
Zbtb17	ENSMUSG00000006215	1.42035	0.00288771	0.0541024	142.278	58.5927
NA	ENSMUSG00000083587	2.23089	0.00289269	0.05414	10.3124	1.1973
Ube2d2b	ENSMUSG00000063447	-1.71381	0.00290523	0.0543191	4.71526	26.0339
NA	ENSMUSG00000087445	-1.74557	0.00292241	0.0545846	20.1773	168.949
Cav2	ENSMUSG00000000058	-2.21949	0.00292783	0.05463	0.463503	4.44551
Pinx1	ENSMUSG00000021958	1.19095	0.00293362	0.0546821	198.042	89.8439
Trio	ENSMUSG00000022263	1.25092	0.0029404	0.0546968	929.207	416.743
Gabrq	ENSMUSG00000031344	2.03168	0.00293953	0.0546968	6.56294	1.73475
Cacnb1	ENSMUSG00000020882	1.54008	0.00294484	0.0547238	232.362	80.6937
Wdr81	ENSMUSG00000045374	1.17611	0.00295391	0.0547807	92.1015	42.6606
Kcnb1	ENSMUSG00000050556	1.5554	0.00295098	0.0547807	158.428	58.0206
Cpeb1	ENSMUSG00000025586	0.92823	0.00296256	0.0548855	842.854	440.009
Snrpb	ENSMUSG00000027404	-1.40762	0.00296636	0.0548915	8.82761	30.812
Otud1	ENSMUSG00000043415	1.60715	0.00296889	0.0548915	166.807	62.6085
NA	ENSMUSG00000074108	-1.65077	0.00297257	0.0549038	5.74916	54.6834
NA	ENSMUSG00000088891	-2.23513	0.00298738	0.0551217	1.95182	126.067
Tenc1	ENSMUSG00000037003	1.45272	0.00299118	0.055136	2787.59	1127.21
Rasa3	ENSMUSG00000031453	1.21842	0.00299981	0.0551838	82.9146	33.8934
NA	ENSMUSG00000093437	-2.00676	0.0029989	0.0551838	7.83135	22.2515
Knop1	ENSMUSG00000030980	1.28586	0.00300499	0.0552235	154.402	65.7447
NA	ENSMUSG00000082374	-1.90768	0.00301806	0.055408	2.52626	19.1175
Ppib	ENSMUSG00000032383	-1.94241	0.00302368	0.0554553	1.17451	9.80928
Rreb1	ENSMUSG00000039087	1.40502	0.00304139	0.0555571	631.672	278.406
Hipk2	ENSMUSG00000061436	1.1815	0.00304036	0.0555571	810.074	370.878
9530026P05Rik	ENSMUSG00000097462	-1.48143	0.00303388	0.0555571	4.87698	15.4226
NA	ENSMUSG00000101892	1.60481	0.00303633	0.0555571	105.221	42.9937
Zfp239	ENSMUSG00000042097	1.94051	0.00304986	0.0556006	13.7453	5.5952
NA	ENSMUSG00000100550	-2.08278	0.00304912	0.0556006	0.473151	9.55414
Ints12	ENSMUSG00000028016	-1.67522	0.00305342	0.0556099	3.1986	15.5856
Rab3il1	ENSMUSG00000024663	1.72083	0.00305918	0.0556225	16.663	5.81458
Slc39a2	ENSMUSG00000072572	-1.91117	0.0030602	0.0556225	0.835988	7.66527
Mta1	ENSMUSG00000021144	1.15054	0.00307238	0.0556778	309.666	151.863
NA	ENSMUSG00000085735	2.07461	0.00307231	0.0556778	22.9598	7.38836
NA	ENSMUSG00000100815	-2.32207	0.00307206	0.0556778	0.215861	2.49268
Zfand3	ENSMUSG00000044477	1.47542	0.00308164	0.0557902	351.125	136.955
Gpatch4	ENSMUSG00000028069	1.5232	0.0030948	0.0559729	173.326	49.9584
1700109H08Rik	ENSMUSG00000008307	-1.81811	0.00311109	0.056212	1.05882	8.58382
Tcf3	ENSMUSG00000020167	1.35553	0.00311779	0.0562208	194.452	79.7407
Egr1	ENSMUSG00000038418	1.62999	0.00312081	0.0562208	47.4006	16.3171
NA	ENSMUSG00000086816	-1.83036	0.0031149	0.0562208	1.26405	9.33943
Ppip5k1	ENSMUSG00000033526	1.27425	0.00312499	0.0562406	1291.52	591.79
Zrsr2	ENSMUSG00000031370	1.47686	0.00313189	0.0562914	274.781	115.291
Nrbp2	ENSMUSG00000075590	1.31924	0.00313398	0.0562914	1784.32	766.289
NA	ENSMUSG00000101635	-1.48655	0.00313896	0.0563255	#VALUE!	#VALUE!
Adamts7	ENSMUSG00000032363	-1.31504	0.00315341	0.0565008	47.7751	125.481
NA	ENSMUSG00000080885	-1.6448	0.00315491	0.0565008	48.7808	309.232
NA	ENSMUSG00000018378	1.427	0.00316143	0.0565621	1046.7	426.147
Rexo1	ENSMUSG00000047417	1.45363	0.00316846	0.0566231	176.957	76.007
Unc13c	ENSMUSG00000062151	1.29521	0.00317414	0.0566231	34.9294	10.9807
Zfp777	ENSMUSG00000071477	1.47959	0.00317331	0.0566231	120.987	52.7486
Pspn	ENSMUSG00000002664	-2.2105	0.00318029	0.0566774	1.08071	15.9616
Amotl1	ENSMUSG00000013076	1.42323	0.0032099	0.0567574	182.068	71.8937
Hey1	ENSMUSG00000040289	-2.19597	0.00320912	0.0567574	0.405106	2.9382
Uggt2	ENSMUSG00000042104	-1.37548	0.00318936	0.0567574	5.50135	19.2814
Spata33	ENSMUSG00000048478	2.1286	0.00321585	0.0567574	2.1607	1.44594
NA	ENSMUSG00000082550	-2.19659	0.00319485	0.0567574	1.22742	21.5418
9530051G07Rik	ENSMUSG00000085982	-2.19856	0.0032091	0.0567574	0.160121	1.80583
NA	ENSMUSG00000086695	1.97799	0.00319836	0.0567574	55.4438	15.2989
LOC102635040	ENSMUSG00000087386	-2.29737	0.00321462	0.0567574	0.214706	7.17314
NA	ENSMUSG00000093537	-1.60689	0.00321319	0.0567574	37.9464	221.518
NA	ENSMUSG00000097961	2.12478	0.00319446	0.0567574	62.9246	4.61139
Slc35d1	ENSMUSG00000028521	1.44337	0.0032214	0.0568005	148.922	68.3456
Pcgf2	ENSMUSG00000018537	1.72028	0.00323558	0.0568515	387.591	124.189
C1qc	ENSMUSG00000036896	-1.8775	0.00323732	0.0568515	7.57954	19.9136
Btbd7	ENSMUSG00000041702	0.809233	0.00323195	0.0568515	157.907	88.6627
NA	ENSMUSG00000084031	2.00628	0.00323985	0.0568515	13.8646	3.91626
NA	ENSMUSG00000092919	2.19484	0.0032313	0.0568515	42.3402	12.8357
Rnf17	ENSMUSG00000000365	-2.15052	0.00324585	0.0569021	0.219023	1.71677
Dgat2	ENSMUSG00000030747	-1.43686	0.00326295	0.057147	18.0209	77.2995
9430016H08Rik	ENSMUSG00000025971	-1.71124	0.00327819	0.0571569	2.9344	20.5149
Alg8	ENSMUSG00000035704	1.07579	0.0032737	0.0571569	57.1907	24.6754
Cul9	ENSMUSG00000040327	1.33443	0.00326916	0.0571569	232.547	103.135
NA	ENSMUSG00000072963	1.71042	0.00327837	0.0571569	18.6016	6.98937
NA	ENSMUSG00000089659	1.23604	0.00327916	0.0571569	264.929	101.527
NA	ENSMUSG00000081139	-1.77953	0.00328541	0.0572113	2.26132	45.4175
NA	ENSMUSG00000100781	-1.93958	0.00328864	0.057213	3.19262	25.1149
Dync1h1	ENSMUSG00000018707	1.10886	0.00329928	0.0572231	695.3	346.821
NA	ENSMUSG00000093826	-2.18553	0.00329407	0.0572231	0.832474	19.7868
NA	ENSMUSG00000097183	1.57658	0.00330176	0.0572231	44.4594	11.279
NA	ENSMUSG00000098425	2.39699	0.00329965	0.0572231	22.4606	2.00676
Dusp8	ENSMUSG00000037887	1.00081	0.00332174	0.0574285	90.7722	47.7383
Sh3bgr	ENSMUSG00000040666	1.59786	0.00332304	0.0574285	1311.05	517.023
NA	ENSMUSG00000092373	-2.26591	0.00332197	0.0574285	0.11803	2.95307
NA	ENSMUSG00000020738	-1.42387	0.00334	0.0575591	31.1475	92.1879
Luc7l3	ENSMUSG00000020863	1.4405	0.0033495	0.0575591	2484	1010.77
Cds1	ENSMUSG00000029330	-1.55565	0.00334434	0.0575591	1.06134	6.91549
Praf2	ENSMUSG00000031149	2.16798	0.00334407	0.0575591	7.56044	2.90636
Slc6a20a	ENSMUSG00000036814	-2.13858	0.00334708	0.0575591	0.119708	3.50842
Gmfb	ENSMUSG00000062014	-1.59982	0.00334367	0.0575591	9.09155	40.3382
Hspb7	ENSMUSG00000006221	1.13583	0.00335747	0.0575615	6120.7	2956.48
Akap2	ENSMUSG00000038729	1.11205	0.00335415	0.0575615	52.1936	25.2359
Zbed3	ENSMUSG00000041995	-1.74729	0.00335909	0.0575615	2.4456	26.6686
Fam193b	ENSMUSG00000021495	1.45559	0.00337076	0.0575738	637.014	264.123
Prph	ENSMUSG00000023484	2.1664	0.00338116	0.0575738	6.6064	0.737355
Slx4	ENSMUSG00000039738	1.40037	0.00337447	0.0575738	165.152	76.5419
Fv1	ENSMUSG00000070583	-1.39537	0.00338188	0.0575738	35.063	109.939
Ccdc82	ENSMUSG00000079084	1.06169	0.00337281	0.0575738	153.902	65.9262
NA	ENSMUSG00000090242	-2.40651	0.00337316	0.0575738	0.137174	1.72401
Samd15	ENSMUSG00000090812	1.09782	0.00337577	0.0575738	41.1517	18.2202
Cdk9	ENSMUSG00000009555	0.797747	0.00338854	0.0575799	95.3806	55.4208
NA	ENSMUSG00000064882	2.40403	0.0033866	0.0575799	19.2201	1.65308
Megf8	ENSMUSG00000045039	1.47903	0.00340846	0.0578342	105.643	44.3414
NA	ENSMUSG00000097300	-1.38496	0.00340984	0.0578342	19.042	68.4086
Col12a1	ENSMUSG00000032332	1.4335	0.0034155	0.0578766	48.1496	14.8731
Larp1	ENSMUSG00000037331	0.968653	0.00342279	0.0579463	646.359	327.639
Ctla4	ENSMUSG00000026011	-1.74468	0.00342691	0.0579625	8.49192	59.5099
Tnk2	ENSMUSG00000022791	1.52539	0.00343456	0.058038	78.0543	24.2093
Sun3	ENSMUSG00000040985	-2.05891	0.00344484	0.0581043	0.73859	21.5522
Mterf2	ENSMUSG00000049038	-1.35003	0.00344204	0.0581043	7.77184	24.8652
Epb4.1l2	ENSMUSG00000019978	1.41687	0.00346534	0.0583422	307.253	133.58
2510009E07Rik	ENSMUSG00000043391	0.927387	0.00346466	0.0583422	42.2297	21.6551
Ambra1	ENSMUSG00000040506	1.05289	0.00347953	0.0585272	723.813	368.988
NA	ENSMUSG00000095199	-1.71914	0.0034848	0.0585619	1.38862	15.5515
Zkscan17	ENSMUSG00000020472	1.17955	0.00348945	0.0585853	95.1113	42.9818
Dock6	ENSMUSG00000032198	1.38735	0.00349261	0.0585853	109.386	47.1383
Zfp462	ENSMUSG00000060206	1.30516	0.00352297	0.0589863	191.554	82.5886
NA	ENSMUSG00000101450	-1.60845	0.00352146	0.0589863	22.3941	103.318
Rab30	ENSMUSG00000030643	-1.58511	0.00353874	0.0591961	6.57647	21.9821
Prrc2c	ENSMUSG00000040225	1.35056	0.00356589	0.0595957	1451.48	662.254
Pm20d1	ENSMUSG00000042251	-1.03803	0.00357966	0.0597711	27.1608	62.6573
Anp32a	ENSMUSG00000032249	1.31769	0.00358686	0.0598368	273.451	121.266
Sla	ENSMUSG00000022372	-1.83848	0.00359247	0.0598757	0.763711	2.40478
Sgsh	ENSMUSG00000005043	1.64772	0.00361172	0.0599776	43.0768	15.2054
Leng8	ENSMUSG00000035545	0.747088	0.00360282	0.0599776	4550.59	2718.54
NA	ENSMUSG00000081226	1.9893	0.00360617	0.0599776	15.3443	3.05771
NA	ENSMUSG00000086602	-1.85213	0.00360871	0.0599776	0.545088	5.51023
NA	ENSMUSG00000031242	-2.0603	0.00361624	0.0599981	0.0738675	2.87645
Ddr1	ENSMUSG00000003534	1.23827	0.00363716	0.0602358	142.023	65.6563
Rab11fip5	ENSMUSG00000051343	1.31586	0.00363659	0.0602358	230.229	93.7761
Nme4	ENSMUSG00000024177	-2.19792	0.00364089	0.0602429	0.311345	6.05667
Gatb	ENSMUSG00000028085	-1.11813	0.00364763	0.0602453	30.5481	66.7493
Syngap1	ENSMUSG00000067629	1.27142	0.00364603	0.0602453	137.498	56.1818
Cic	ENSMUSG00000005442	1.23676	0.00365507	0.0602769	420.874	194.013
Nin	ENSMUSG00000021068	1.16093	0.00365945	0.0602769	156.019	65.8649
NA	ENSMUSG00000053889	1.48805	0.00365729	0.0602769	15.8761	6.02227
Hbegf	ENSMUSG00000024486	1.22554	0.00366486	0.0603117	355.012	152.447
Itgb6	ENSMUSG00000026971	-0.976436	0.00367112	0.0603381	104.501	220.383
Bcar1	ENSMUSG00000031955	1.22359	0.00367307	0.0603381	299.194	144.721
Pilrb2	ENSMUSG00000066682	-2.29976	0.0036842	0.0603628	0.180986	3.86484
B130006D01Rik	ENSMUSG00000075596	-1.73408	0.00368449	0.0603628	5.44379	28.0255
NA	ENSMUSG00000094487	-1.92462	0.00367989	0.0603628	1.17668	15.2886
NA	ENSMUSG00000091998	-2.37756	0.00369569	0.0604921	0.258153	3.62676
Lpl	ENSMUSG00000015568	-0.966898	0.00370685	0.0605632	430.926	870.97
Mark4	ENSMUSG00000030397	1.56573	0.00371248	0.0605632	223.846	85.3213
Rbm12	ENSMUSG00000089824	-1.88042	0.00371329	0.0605632	1.42066	16.2146
NA	ENSMUSG00000091193	2.19418	0.00371072	0.0605632	19.1392	7.33132
Bbc3	ENSMUSG00000002083	2.10209	0.00372076	0.0605768	20.2424	2.24416
NA	ENSMUSG00000084860	-1.9606	0.0037204	0.0605768	3.26305	51.0444
Mfsd10	ENSMUSG00000001082	1.54762	0.00373854	0.0608121	64.2478	23.3361
Aldh9a1	ENSMUSG00000026687	-0.966958	0.00376138	0.0611291	63.2196	136.729
Ltbp2	ENSMUSG00000002020	1.55162	0.00376665	0.0611603	98.4083	28.4158
NA	ENSMUSG00000045999	2.0394	0.00377161	0.0611864	#VALUE!	#VALUE!
Car9	ENSMUSG00000028463	1.67171	0.00378069	0.0612251	64.5281	11.764
Pak4	ENSMUSG00000030602	1.12229	0.00377787	0.0612251	342.235	161.78
Stradb	ENSMUSG00000026027	-1.2077	0.0037866	0.0612665	51.8159	135.295
Rnf10	ENSMUSG00000041740	1.30733	0.00379179	0.0612961	288.33	135.843
Incenp	ENSMUSG00000024660	1.77384	0.00380387	0.061342	35.8754	9.01692
Ints1	ENSMUSG00000029547	1.50091	0.00380203	0.061342	181.354	76.8541
Capn12	ENSMUSG00000054083	1.87041	0.0038047	0.061342	7.11443	1.64456
Arf3	ENSMUSG00000051853	1.12413	0.00381676	0.0614821	130.599	64.6439
Mrgbp	ENSMUSG00000027569	1.36319	0.00383132	0.0615742	230.214	94.4087
Lipt2	ENSMUSG00000030725	-1.73925	0.00383452	0.0615742	2.18203	11.4192
Mboat1	ENSMUSG00000038732	-1.90533	0.00383596	0.0615742	0.333988	6.23623
Ciz1	ENSMUSG00000039205	1.41865	0.0038321	0.0615742	568.233	258.521
D8Ertd738e	ENSMUSG00000019362	1.31634	0.00385673	0.0617069	90.289	37.2537
Cap2	ENSMUSG00000021373	1.25531	0.00386111	0.0617069	407.888	195.913
Plcl2	ENSMUSG00000038910	1.38401	0.00385815	0.0617069	49.0364	14.9937
Fut10	ENSMUSG00000046152	-2.26154	0.00385475	0.0617069	0.0951087	1.83886
NA	ENSMUSG00000064655	1.84422	0.00385203	0.0617069	179.646	46.7002
Bcl2l1	ENSMUSG00000007659	1.4306	0.00387972	0.0617968	182.478	72.6605
Tjap1	ENSMUSG00000012296	1.37755	0.00387914	0.0617968	827.078	376.739
Rnft2	ENSMUSG00000032850	1.68521	0.00388027	0.0617968	30.2173	12.3218
Flot2	ENSMUSG00000061981	1.2795	0.00387526	0.0617968	164.404	72.2741
Ahnak	ENSMUSG00000069833	0.915447	0.00388544	0.0618252	689.549	362.353
Ino80dos	ENSMUSG00000084799	-1.46877	0.00389456	0.0618626	14.0166	49.9351
NA	ENSMUSG00000099138	-1.36462	0.00389257	0.0618626	6.21749	21.7384
Taok2	ENSMUSG00000059981	1.13111	0.00390382	0.0619557	255.746	115.829
Frmd5	ENSMUSG00000027238	-1.1696	0.0039159	0.061995	193.824	429.976
Skiv2l	ENSMUSG00000040356	1.1227	0.00391485	0.061995	150.345	72.2013
Gpr22	ENSMUSG00000044067	-1.68118	0.00391987	0.061995	4.43993	24.433
Zfp180	ENSMUSG00000057101	0.926649	0.00391836	0.061995	64.5569	34.4168
Nr1d2	ENSMUSG00000021775	-1.0054	0.0039255	0.0620304	160.617	333.621
Rara	ENSMUSG00000037992	1.42163	0.00393891	0.0621884	238.469	105.22
Trappc2	ENSMUSG00000079317	-1.88181	0.00395137	0.0623313	1.20879	11.6814
Ppfibp1	ENSMUSG00000016487	0.90053	0.00396575	0.0623529	275.248	144.22
Lrrc15	ENSMUSG00000052316	-1.38674	0.00397663	0.0623529	11.22	36.9404
Glis3	ENSMUSG00000052942	1.62004	0.00396294	0.0623529	7.59136	2.30794
Ptk2b	ENSMUSG00000059456	1.67266	0.00396937	0.0623529	66.6683	20.0514
NA	ENSMUSG00000084929	-1.90327	0.00397605	0.0623529	0.513581	8.63426
NA	ENSMUSG00000087235	1.56725	0.00396772	0.0623529	30.9326	11.8324
Gm13238	ENSMUSG00000096233	1.47892	0.00397122	0.0623529	150.238	50.5334
Etv6	ENSMUSG00000030199	0.970107	0.00398057	0.0623611	87.1251	46.2654
Rgl2	ENSMUSG00000041354	1.35399	0.00399009	0.0623964	123.412	54.1223
NA	ENSMUSG00000083473	-1.76161	0.00399307	0.0623964	7.50529	27.0525
NA	ENSMUSG00000094497	1.67263	0.00399193	0.0623964	63.3479	24.334
NA	ENSMUSG00000075268	-2.21613	0.00399775	0.0624161	0.562087	14.6171
P2rx6	ENSMUSG00000022758	-1.36339	0.00400233	0.0624196	3.24235	8.37279
NA	ENSMUSG00000077928	-0.997395	0.00400481	0.0624196	7676.08	15235.6
NA	ENSMUSG00000099901	1.7602	0.0040163	0.0625453	10.1475	2.61464
Adam12	ENSMUSG00000054555	1.48888	0.0040277	0.0626696	7.08477	2.85542
Hecw1	ENSMUSG00000021301	2.29347	0.00403758	0.0627697	0.312118	0.161595
Gpc2	ENSMUSG00000029510	-2.21755	0.00404111	0.0627713	0.0495521	2.06482
NA	ENSMUSG00000086448	-1.95662	0.00405175	0.0628831	0.353215	3.25081
A330023F24Rik	ENSMUSG00000096929	-1.2856	0.00406251	0.0629965	112.761	320.978
Kmt2a	ENSMUSG00000002028	1.09926	0.00407339	0.0630513	1349.77	656.153
Plcg2	ENSMUSG00000034330	1.08085	0.00407359	0.0630513	106.868	47.488
Sh3pxd2a	ENSMUSG00000053617	1.19962	0.0040764	0.0630513	129.582	62.2739
Id3	ENSMUSG00000007872	2.08444	0.00408474	0.063091	11.5533	9.47258
Tshz2	ENSMUSG00000047907	1.83186	0.00408587	0.063091	10.4738	4.29367
Pip5k1c	ENSMUSG00000034902	1.19359	0.00409606	0.0631025	68.5383	28.9762
Col6a3	ENSMUSG00000048126	0.957573	0.00410148	0.0631025	50.8596	27.2523
1500009C09Rik	ENSMUSG00000068099	2.35159	0.00410422	0.0631025	1.87442	0.187527
Peak1	ENSMUSG00000074305	1.10014	0.00410734	0.0631025	448.215	210.888
Fam174b	ENSMUSG00000078670	-1.43413	0.00409314	0.0631025	12.6503	56.4199
NA	ENSMUSG00000097103	2.20276	0.00409704	0.0631025	8.65443	3.75136
Nisch	ENSMUSG00000021910	1.1362	0.004117	0.0631977	1845.23	901.093
Golgb1	ENSMUSG00000034243	1.31084	0.00412117	0.0632021	990.467	398.413
NA	ENSMUSG00000083833	1.68284	0.0041242	0.0632021	60.0939	22.9992
Gltscr1	ENSMUSG00000070808	1.24521	0.00413075	0.0632494	213.87	89.8049
Arl6ip5	ENSMUSG00000035199	-1.30357	0.00414912	0.0634773	24.885	65.2826
Paqr4	ENSMUSG00000023909	-1.39592	0.00419539	0.0634943	8.19958	28.1823
Wiz	ENSMUSG00000024050	1.26233	0.00416812	0.0634943	128.404	53.4179
Sfxn3	ENSMUSG00000025212	1.64804	0.00419618	0.0634943	40.186	15.3309
Apol6	ENSMUSG00000033576	1.31358	0.00416631	0.0634943	31.6139	13.3058
Wbscr17	ENSMUSG00000034040	1.86145	0.00417482	0.0634943	13.9298	5.46357
Myrf	ENSMUSG00000036098	1.44766	0.0041717	0.0634943	90.6414	36.5222
Lin37	ENSMUSG00000036845	1.34843	0.00417521	0.0634943	177.16	76.4706
Atf5	ENSMUSG00000038539	1.3218	0.00419889	0.0634943	55.6439	23.1259
Cpeb2	ENSMUSG00000039782	1.25832	0.0041973	0.0634943	258.816	125.926
Ankrd24	ENSMUSG00000054708	1.54659	0.0041856	0.0634943	101.316	45.9094
NA	ENSMUSG00000077505	-1.48826	0.00415672	0.0634943	67.5166	231.81
NA	ENSMUSG00000080859	-1.61008	0.00418065	0.0634943	47.7986	294.391
NA	ENSMUSG00000094090	1.42155	0.00419731	0.0634943	357.209	158.88
NA	ENSMUSG00000097727	1.36136	0.00416348	0.0634943	78.754	34.7167
Rbfox2	ENSMUSG00000033565	1.05495	0.0042033	0.0635083	734.46	362.998
Wasf2	ENSMUSG00000028868	1.1642	0.00422091	0.0636166	226.973	111.26
Ovgp1	ENSMUSG00000074340	1.89844	0.0042183	0.0636166	37.9907	12.8496
NA	ENSMUSG00000097507	-1.44113	0.00421404	0.0636166	3.8764	16.2484
Cd300lg	ENSMUSG00000017309	-1.76426	0.00427632	0.0641371	0.602054	5.49894
Zc3h18	ENSMUSG00000017478	1.37658	0.00426295	0.0641371	379.691	169.898
Per1	ENSMUSG00000020893	1.3361	0.00428119	0.0641371	554.74	236.453
Emc9	ENSMUSG00000022217	-1.43155	0.00429337	0.0641371	42.2402	149.385
Vasp	ENSMUSG00000030403	1.0225	0.00428395	0.0641371	138.812	69.6882
Iars	ENSMUSG00000037851	0.764992	0.00429092	0.0641371	372.556	214.515
Chchd7	ENSMUSG00000042198	-1.85157	0.00426263	0.0641371	3.03948	35.0295
Zfp943	ENSMUSG00000053347	-1.37088	0.00428011	0.0641371	5.02292	19.768
NA	ENSMUSG00000073411	-1.21891	0.00427928	0.0641371	15.3867	37.0621
Gm6878	ENSMUSG00000075549	-2.10632	0.00427817	0.0641371	0.191332	9.07205
NA	ENSMUSG00000091881	-1.65358	0.00429406	0.0641371	43.7721	201.21
Arhgef7	ENSMUSG00000031511	1.21357	0.0043101	0.0641779	752.115	353.508
Babam1	ENSMUSG00000031820	1.64838	0.00430033	0.0641779	225.55	104.256
Dos	ENSMUSG00000035640	1.76955	0.00430928	0.0641779	39.7864	5.023
Wdr60	ENSMUSG00000042050	1.64735	0.00431085	0.0641779	68.3441	22.8574
NA	ENSMUSG00000089839	-1.74264	0.00433704	0.0645153	6.50992	43.961
Dysf	ENSMUSG00000033788	1.18688	0.00435706	0.0647603	947.044	421.042
Ptpn12	ENSMUSG00000028771	1.12166	0.00437027	0.0648796	373.44	167.188
NA	ENSMUSG00000065387	-2.27109	0.00437219	0.0648796	1.36123	42.5644
Dok3	ENSMUSG00000035711	-1.79861	0.00438602	0.065032	0.544645	7.808
Il18r1	ENSMUSG00000026070	1.65837	0.00439586	0.0650564	4.25284	1.27357
Ap3m2	ENSMUSG00000031539	-2.16536	0.00440191	0.0650564	0.261015	3.39079
Rpp25l	ENSMUSG00000036114	-2.05608	0.00439945	0.0650564	0.605521	21.0017
Pom121	ENSMUSG00000053293	1.26326	0.00440179	0.0650564	274.522	126.36
Pycard	ENSMUSG00000030793	-1.70174	0.00441348	0.0651746	0.387901	6.26637
Kcnn3	ENSMUSG00000000794	2.1924	0.00444572	0.065305	0.847798	0.149459
Chac2	ENSMUSG00000020309	-1.86778	0.00444733	0.065305	1.04209	15.6727
Cep131	ENSMUSG00000039781	1.67237	0.00443817	0.065305	53.7146	21.7049
Crocc	ENSMUSG00000040860	1.69486	0.00443923	0.065305	31.7607	11.7379
Mkl1	ENSMUSG00000042292	1.10772	0.0044389	0.065305	107.503	49.5096
NA	ENSMUSG00000065049	-1.77446	0.00444099	0.065305	25.2224	183.879
Irgm2	ENSMUSG00000069874	-1.59499	0.00443296	0.065305	1.08453	9.58686
Zfp523	ENSMUSG00000024220	1.32383	0.00445404	0.0653509	253.527	97.1974
Xrra1	ENSMUSG00000035211	2.20631	0.00448206	0.0657092	2.24994	0.188958
NA	ENSMUSG00000083157	-2.2757	0.00449718	0.0658782	0.743313	16.6577
Gm6625	ENSMUSG00000094790	1.80352	0.00450371	0.0659209	53.4481	9.89275
Ep400	ENSMUSG00000029505	1.4039	0.00452138	0.0661266	325.176	151.917
Akna	ENSMUSG00000039158	1.53312	0.00456061	0.0666376	33.6234	14.5243
Synpo	ENSMUSG00000043079	1.1714	0.00456362	0.0666376	633.813	309.699
NA	ENSMUSG00000089791	1.00294	0.0045758	0.0667621	217.583	103.2
Nelfe	ENSMUSG00000024369	1.27937	0.00459264	0.0667988	124.786	46.38
Aff1	ENSMUSG00000029313	1.39446	0.00458334	0.0667988	753.451	339.158
D430042O09Rik	ENSMUSG00000032743	1.22726	0.00458743	0.0667988	38.2462	18.3064
Phf21a	ENSMUSG00000058318	1.0268	0.00459294	0.0667988	168.992	80.3884
Yrdc	ENSMUSG00000028889	-2.08934	0.00460021	0.0668513	0.402762	6.60631
Prap1	ENSMUSG00000025467	-2.01633	0.00461392	0.0669961	1.11948	19.055
Coq10a	ENSMUSG00000039914	-0.832112	0.00461751	0.0669961	97.3187	177.237
Pigp	ENSMUSG00000022940	-2.01044	0.00463846	0.0672296	1.49501	26.7485
Trim26	ENSMUSG00000024457	1.2767	0.00464097	0.0672296	148.056	72.0636
Snx9	ENSMUSG00000002365	0.84752	0.00466356	0.0672543	120.515	63.0577
Pi4k2a	ENSMUSG00000025178	1.15538	0.00465155	0.0672543	150.53	73.1094
Rhbdd1	ENSMUSG00000026142	-1.61577	0.00469712	0.0672543	4.23479	22.1667
Agfg2	ENSMUSG00000029722	1.38269	0.00466552	0.0672543	81.3738	31.6878
Prr14	ENSMUSG00000030822	1.312	0.0046979	0.0672543	607.333	290.316
Lrrc14	ENSMUSG00000033728	1.31665	0.004673	0.0672543	30.22	12.5547
Zfc3h1	ENSMUSG00000034163	0.983071	0.00469725	0.0672543	934.889	469.43
Wdr62	ENSMUSG00000037020	1.38833	0.00465926	0.0672543	34.3128	12.6204
Tnni3k	ENSMUSG00000040086	-0.969498	0.00468487	0.0672543	315.162	668.796
Mettl11b	ENSMUSG00000040113	-2.23818	0.00467074	0.0672543	0.127679	1.36365
Map3k10	ENSMUSG00000040390	1.56832	0.00465549	0.0672543	39.8353	15.7655
Lrrc8e	ENSMUSG00000046589	1.97894	0.00468767	0.0672543	3.83513	0.362489
Elfn1	ENSMUSG00000048988	2.01802	0.00466161	0.0672543	3.61395	0.436071
NA	ENSMUSG00000052865	2.25433	0.00468814	0.0672543	2.3837	0.161885
1110038F14Rik	ENSMUSG00000063236	1.32013	0.00469768	0.0672543	162.955	65.3613
Myh11	ENSMUSG00000018830	1.73065	0.00471058	0.0673303	22.3569	8.83232
NA	ENSMUSG00000081560	1.99587	0.00470739	0.0673303	2.9192	0.552689
Ercc2	ENSMUSG00000030400	1.47556	0.00471904	0.0673985	78.0862	32.8651
Tmem198	ENSMUSG00000051703	1.50569	0.0047267	0.0674545	42.5728	18.0222
Sptbn5	ENSMUSG00000074899	1.40916	0.00473035	0.0674545	52.272	22.1101
Slc6a5	ENSMUSG00000039728	2.29895	0.00476179	0.0677486	0.76943	0.0340826
NA	ENSMUSG00000071273	1.25515	0.00476142	0.0677486	135.803	61.0855
NA	ENSMUSG00000097820	1.54096	0.00476209	0.0677486	36.4662	12.7742
Fam171a1	ENSMUSG00000050530	1.41398	0.00478273	0.0679363	32.0468	14.5715
NA	ENSMUSG00000082286	0.993557	0.00478237	0.0679363	408.595	211
Fam53c	ENSMUSG00000034300	1.39338	0.00480131	0.0681473	97.6974	43.9671
Prpf40b	ENSMUSG00000023007	1.42301	0.00480828	0.0681932	611.332	285.216
NA	ENSMUSG00000002250	1.40679	0.00482524	0.0682219	327.788	135.954
Fgfr1op	ENSMUSG00000069135	-0.814813	0.00481987	0.0682219	111.734	207.325
NA	ENSMUSG00000091405	-1.77776	0.00482173	0.0682219	1.73195	43.0038
NA	ENSMUSG00000092888	2.31553	0.00481508	0.0682219	14.6379	2.2667
Srek1ip1	ENSMUSG00000021716	1.42853	0.00483617	0.0683235	310.485	133.712
Nfe2l3	ENSMUSG00000029832	-2.08709	0.00484716	0.068373	0.634222	4.68317
Mllt6	ENSMUSG00000038437	1.17353	0.00484695	0.068373	367.272	183.683
Pebp1	ENSMUSG00000032959	-1.55396	0.00485268	0.068398	11.8473	55.8358
NA	ENSMUSG00000081456	-1.93379	0.00486625	0.0685364	1.35087	13.9274
Camsap2	ENSMUSG00000041570	0.819849	0.00487008	0.0685375	174.014	96.3097
Ift52	ENSMUSG00000017858	1.07636	0.00487642	0.06854	67.0414	29.629
3110056K07Rik	ENSMUSG00000085622	-1.6773	0.00487776	0.06854	6.62721	64.9641
Lnx2	ENSMUSG00000016520	0.861238	0.00488348	0.0685512	219.292	119.584
Kars	ENSMUSG00000031948	0.78954	0.00488981	0.0685512	75.18	41.8931
Ildr2	ENSMUSG00000040612	1.51971	0.00488692	0.0685512	20.0739	6.70048
Dleu2	ENSMUSG00000097589	-1.10734	0.0048978	0.0686106	27.0559	54.5403
Kdm4b	ENSMUSG00000024201	0.924348	0.00490802	0.068619	162.78	87.5449
Bhlhe40	ENSMUSG00000030103	0.775075	0.00490992	0.068619	745.877	442.384
Phf12	ENSMUSG00000037791	1.08412	0.00490309	0.068619	249.254	129.015
NA	ENSMUSG00000081758	1.38019	0.00491343	0.068619	565.61	231.773
NA	ENSMUSG00000084201	-2.15779	0.00493068	0.0688072	1.76767	37.8801
Atxn10	ENSMUSG00000016541	0.960476	0.00494135	0.068851	281.627	140.714
Elmsan1	ENSMUSG00000042507	1.11148	0.00493806	0.068851	105.654	49.3904
NA	ENSMUSG00000080966	1.20983	0.00494784	0.0688889	92.8515	41.9211
Zfp423	ENSMUSG00000045333	1.71768	0.00497243	0.0691785	39.111	13.3992
Ptms	ENSMUSG00000030122	1.30982	0.00499186	0.0691854	334.825	144.14
Hpx	ENSMUSG00000030895	2.28962	0.00497903	0.0691854	0.840492	0.0667111
Arl4c	ENSMUSG00000049866	1.22478	0.00498497	0.0691854	49.9596	22.2532
4632427E13Rik	ENSMUSG00000074024	-1.39207	0.00498661	0.0691854	60.1712	167.885
NA	ENSMUSG00000081662	2.12519	0.00498852	0.0691854	9.03887	1.07164
Plekhd1	ENSMUSG00000066438	2.03602	0.00500091	0.0692583	18.3319	1.84313
Ahdc1	ENSMUSG00000037692	1.35238	0.00501013	0.0693334	296.326	125.329
Aatf	ENSMUSG00000018697	0.991876	0.00502898	0.069489	368.824	180.979
Zcchc14	ENSMUSG00000061410	1.1299	0.00502762	0.069489	151.188	75.814
NA	ENSMUSG00000009927	-1.35	0.00503556	0.0695272	14.7513	58.3941
Cenpf	ENSMUSG00000026605	-1.41872	0.00504106	0.0695507	1.82732	6.27758
NA	ENSMUSG00000081805	-1.99317	0.0050587	0.0696888	4.1799	50.3753
NA	ENSMUSG00000083693	-1.95793	0.00505814	0.0696888	5.31784	29.9082
Tomm34	ENSMUSG00000018322	1.17473	0.0050676	0.0697587	93.1095	40.2831
Rbpms	ENSMUSG00000031586	0.68298	0.00507308	0.0697815	2524.21	1555.7
Cnga3	ENSMUSG00000026114	-1.08335	0.0050774	0.0697884	7.48339	16.1811
H1f0	ENSMUSG00000096210	1.45333	0.00508874	0.0698917	232.215	95.0141
Mrps9	ENSMUSG00000060679	-1.24319	0.00510826	0.0701071	43.0734	110.622
NA	ENSMUSG00000100130	-1.96744	0.00511622	0.0701637	0.41947	12.1583
Tubg2	ENSMUSG00000045007	1.60495	0.00512389	0.0702161	63.1637	24.9437
Slc31a1	ENSMUSG00000066150	-1.34559	0.00514851	0.0705006	7.0553	18.928
NA	ENSMUSG00000096954	-1.67965	0.00516271	0.0706421	49.7172	214.313
NA	ENSMUSG00000016559	1.71007	0.00517979	0.0707087	56.6252	28.3074
Carns1	ENSMUSG00000075289	0.945267	0.00517548	0.0707087	442.453	230.725
NA	ENSMUSG00000080844	1.71012	0.00517303	0.0707087	221.572	102.028
NA	ENSMUSG00000093739	-1.69409	0.00518306	0.0707087	7.57311	73.0571
Setd5	ENSMUSG00000034269	0.828972	0.00519045	0.0707567	697.182	405.856
Tssk4	ENSMUSG00000007591	2.00568	0.00521042	0.0709027	5.41327	0.850021
Fhl2	ENSMUSG00000008136	-0.914266	0.00522027	0.0709027	1087.02	2090.7
Bop1	ENSMUSG00000022557	0.981378	0.00520556	0.0709027	96.6745	50.2148
Shank1	ENSMUSG00000038738	1.18202	0.00522057	0.0709027	106.552	52.6479
NA	ENSMUSG00000094605	-1.64943	0.00522032	0.0709027	55.3325	327.424
Rabac1	ENSMUSG00000003380	-1.52227	0.00524546	0.0709794	3.03645	19.88
Mylk	ENSMUSG00000022836	1.34595	0.00524565	0.0709794	52.4706	24.5376
Cchcr1	ENSMUSG00000040312	1.433	0.00523795	0.0709794	60.2615	21.5499
Nacad	ENSMUSG00000041073	1.61979	0.00524401	0.0709794	80.0739	25.0384
NA	ENSMUSG00000082324	2.01742	0.00523679	0.0709794	3.7363	0.669448
Fam20c	ENSMUSG00000025854	1.16718	0.00525638	0.0710721	192.246	73.9413
Lrp8	ENSMUSG00000028613	1.56019	0.00526787	0.0711747	364.38	67.056
Tnp1	ENSMUSG00000026182	2.04906	0.00527957	0.0712801	33.7699	19.1441
Mrs2	ENSMUSG00000021339	-1.10673	0.00529381	0.0713854	49.1169	119.475
Upf3b	ENSMUSG00000036572	1.43516	0.00529519	0.0713854	463.859	190.631
Rpp21	ENSMUSG00000024446	1.61004	0.00531021	0.0715351	108.68	36.3478
Auts2	ENSMUSG00000029673	1.11845	0.00532049	0.0716208	471.466	238.968
Foxg1	ENSMUSG00000020950	2.15997	0.00532687	0.0716294	1.70205	0.214739
Phf2	ENSMUSG00000038025	1.26656	0.00532897	0.0716294	198.084	93.7123
Srebf2	ENSMUSG00000022463	1.35493	0.00533756	0.071692	66.1576	29.8212
Kif1c	ENSMUSG00000020821	1.1963	0.00534397	0.0717011	439.736	218.27
Bcl11b	ENSMUSG00000048251	-1.17105	0.00534609	0.0717011	3.57607	8.11647
Ppp1r26	ENSMUSG00000035829	1.39279	0.00535207	0.0717288	22.3042	9.11975
Phex	ENSMUSG00000057457	1.54691	0.00535847	0.0717618	3.51689	1.15411
Ush1c	ENSMUSG00000030838	1.47466	0.00536607	0.071811	739.009	303.226
Zfp651	ENSMUSG00000013419	1.28985	0.00537255	0.0718451	158.578	64.5203
Prdm16	ENSMUSG00000039410	1.30543	0.00537781	0.0718628	240.602	113.253
NA	ENSMUSG00000085341	-1.7823	0.00538232	0.0718705	#VALUE!	#VALUE!
Vrk1	ENSMUSG00000021115	-1.38281	0.00542073	0.0719874	8.26091	31.3277
Syk	ENSMUSG00000021457	1.33986	0.00541865	0.0719874	493.302	174.301
Esrra	ENSMUSG00000024955	1.10166	0.00542278	0.0719874	256.438	128.011
Dmwd	ENSMUSG00000030410	1.38674	0.00541401	0.0719874	833.105	372.543
Hsd11b2	ENSMUSG00000031891	-2.00301	0.00542655	0.0719874	0.360752	6.23299
Sgsm2	ENSMUSG00000038351	1.17044	0.00540034	0.0719874	62.2842	29.5397
Gm15417	ENSMUSG00000074466	-1.42169	0.00542025	0.0719874	18.9505	57.8537
4930523C07Rik	ENSMUSG00000090394	1.07628	0.00542099	0.0719874	149.963	67.8044
NA	ENSMUSG00000101413	-1.89633	0.00541432	0.0719874	5.31909	39.2742
Trpc3	ENSMUSG00000027716	-1.66969	0.00544536	0.0721846	0.778603	6.41518
NA	ENSMUSG00000086245	-0.841059	0.00545573	0.0722696	56.1782	105.275
Mtmr14	ENSMUSG00000030269	0.839027	0.00546323	0.0723082	85.8482	47.4516
BC034090	ENSMUSG00000033722	1.43961	0.00546656	0.0723082	1726.91	700.576
Ipo4	ENSMUSG00000002319	0.962328	0.00547329	0.0723379	178.839	88.8834
Tfcp2	ENSMUSG00000009733	0.781247	0.00548416	0.0723379	79.6992	46.7616
Pts	ENSMUSG00000032067	-1.47329	0.00549653	0.0723379	16.2255	63.0642
Eef2	ENSMUSG00000034994	1.12998	0.00549338	0.0723379	1553.47	796.505
Arglu1	ENSMUSG00000040459	1.5151	0.0054917	0.0723379	534.056	200.16
NA	ENSMUSG00000073427	-1.57939	0.00549546	0.0723379	6.46497	35.3538
NA	ENSMUSG00000086877	-1.94049	0.00547906	0.0723379	2.57178	27.8177
Dusp4	ENSMUSG00000031530	1.50673	0.00551346	0.0724563	24.5173	10.0871
Igf2	ENSMUSG00000048583	1.84292	0.00551321	0.0724563	4.38629	1.47592
Gatad2a	ENSMUSG00000036180	1.15273	0.00555533	0.0728493	143.278	67.5332
Chd4	ENSMUSG00000063870	1.29624	0.00555413	0.0728493	757.637	344.463
NA	ENSMUSG00000092051	1.74586	0.0055549	0.0728493	1143.51	331.168
Selenbp1	ENSMUSG00000068874	-1.24945	0.00556001	0.0728585	31.4913	98.7228
Ddx39b	ENSMUSG00000019432	0.82026	0.00561326	0.0732421	1689.86	916.038
Serpind1	ENSMUSG00000022766	-1.70361	0.00561836	0.0732421	4.8039	29.1814
Nr4a2	ENSMUSG00000026826	-2.0038	0.00561694	0.0732421	0.492205	3.23243
Adk	ENSMUSG00000039197	-0.933798	0.00561226	0.0732421	68.9571	135.818
Zfp869	ENSMUSG00000054648	-0.912739	0.00559526	0.0732421	54.0354	108.728
Kcnc3	ENSMUSG00000062785	1.39593	0.00562137	0.0732421	66.9319	29.9627
Fndc1	ENSMUSG00000071984	1.26912	0.00560441	0.0732421	89.2701	36.3637
NA	ENSMUSG00000082693	-2.2322	0.00561448	0.0732421	0.977618	10.3374
Sugp1	ENSMUSG00000011306	1.19152	0.00565664	0.0736485	148.809	66.7092
Upf3a	ENSMUSG00000038398	1.71338	0.00566465	0.0736485	67.412	22.836
Syne2	ENSMUSG00000063450	1.09412	0.00566264	0.0736485	95.4343	44.9864
Dvl1	ENSMUSG00000029071	1.33001	0.00567448	0.0737238	275.46	127.773
1700025G04Rik	ENSMUSG00000032666	1.22021	0.00570058	0.0740102	415.072	162.646
Prcc	ENSMUSG00000004895	1.3268	0.0057176	0.0740734	179.321	79.3044
Gipr	ENSMUSG00000030406	1.65987	0.00571556	0.0740734	33.4451	10.8381
Ostn	ENSMUSG00000052276	2.22072	0.00571351	0.0740734	2.30973	0.286749
Ppp1r15a	ENSMUSG00000040435	1.18133	0.00572495	0.074116	202.887	101.437
Wdr70	ENSMUSG00000039828	1.35031	0.00574591	0.0743347	185.965	77.028
Trim47	ENSMUSG00000020773	1.23797	0.00575659	0.0744201	309.949	110.485
Mef2d	ENSMUSG00000001419	0.876937	0.00578849	0.0746743	1709.13	920.155
Dlg5	ENSMUSG00000021782	1.29537	0.00578579	0.0746743	164.425	66.4611
Rrp12	ENSMUSG00000035049	1.51795	0.00578851	0.0746743	441.309	165.807
NA	ENSMUSG00000041878	-2.0235	0.00579578	0.0747153	0.335515	9.38768
NA	ENSMUSG00000084894	-1.58138	0.00580141	0.0747351	74.3355	222.959
Actr1b	ENSMUSG00000037351	1.13045	0.00581888	0.0749073	649.33	284.764
Malat1	ENSMUSG00000092341	1.06075	0.00583034	0.0750019	812937	387687
Tram1	ENSMUSG00000025935	-1.40005	0.00584835	0.0750896	6.6113	24.7551
Dcps	ENSMUSG00000032040	-1.4305	0.00584161	0.0750896	14.7314	34.1715
Usp36	ENSMUSG00000033909	1.39385	0.00584948	0.0750896	464.016	225.679
Tfe3	ENSMUSG00000000134	1.00219	0.00587768	0.0753986	56.7981	29.3554
NA	ENSMUSG00000087514	-1.71062	0.00588329	0.0754175	11.7504	89.5447
A530016L24Rik	ENSMUSG00000043122	-1.09423	0.00589359	0.0754967	24.9492	51.678
St14	ENSMUSG00000031995	1.83739	0.00590098	0.0755383	16.187	4.22419
Ppp1r9b	ENSMUSG00000038976	1.25322	0.00591191	0.0756252	180.686	82.7649
Abcc10	ENSMUSG00000032842	0.873929	0.00593284	0.0757963	199.471	108.878
Ugt1a6a	ENSMUSG00000054545	-2.22676	0.00593358	0.0757963	0.0902356	1.67404
Vldlr	ENSMUSG00000024924	-0.775511	0.00594431	0.0758326	327.657	593.216
Zbtb21	ENSMUSG00000046962	1.52695	0.00594472	0.0758326	101.728	47.2258
Glt28d2	ENSMUSG00000031286	-1.50472	0.00596356	0.0760198	43.0855	209.85
Grhl2	ENSMUSG00000022286	-1.618	0.00600864	0.0761781	0.927874	8.26091
Ndufa5	ENSMUSG00000023089	-1.34648	0.00598786	0.0761781	20.2646	69.7527
F2	ENSMUSG00000027249	2.04412	0.00600934	0.0761781	2.03391	0.714464
Neurl1b	ENSMUSG00000034413	1.83233	0.00600822	0.0761781	8.77069	4.51742
Rfxank	ENSMUSG00000036120	1.18394	0.00599048	0.0761781	86.443	39.5171
Fam173b	ENSMUSG00000039065	-1.41778	0.0060079	0.0761781	15.9996	63.2185
Fitm2	ENSMUSG00000048486	-1.27731	0.006007	0.0761781	26.6371	70.2382
4833412C05Rik	ENSMUSG00000097697	1.34876	0.00599497	0.0761781	43.35	16.06
Srsf1	ENSMUSG00000018379	-1.07888	0.00601487	0.0761953	109.373	266.213
Tep1	ENSMUSG00000006281	0.863403	0.00603355	0.0763299	135.185	75.2891
Map4k4	ENSMUSG00000026074	1.3517	0.00603631	0.0763299	643.353	269.923
Ankmy2	ENSMUSG00000036188	-1.41501	0.00603803	0.0763299	6.90538	19.6598
Rhbdf1	ENSMUSG00000020282	1.19078	0.00605449	0.0764851	154.326	70.0443
Arid1a	ENSMUSG00000007880	0.855359	0.00606785	0.076548	398.42	219.585
Zfp454	ENSMUSG00000048728	2.07429	0.00606645	0.076548	5.42776	4.40599
Fbf1	ENSMUSG00000020776	1.41651	0.00608908	0.076633	146.221	68.1523
Snap91	ENSMUSG00000033419	0.851128	0.00609685	0.076633	94.453	50.75
Fam89a	ENSMUSG00000043068	-2.01629	0.00610396	0.076633	1.09769	3.94136
A430105I19Rik	ENSMUSG00000045838	1.42438	0.00608638	0.076633	495.404	199.13
Fam133b	ENSMUSG00000058503	1.39225	0.00610354	0.076633	302.906	144.987
Acsf2	ENSMUSG00000076435	1.29286	0.00610293	0.076633	76.783	32.2337
NA	ENSMUSG00000097644	-1.97674	0.00608581	0.076633	0.296001	11.0643
Pak3	ENSMUSG00000031284	1.53153	0.00610975	0.076653	14.6073	3.14191
Tcf7l1	ENSMUSG00000055799	1.39934	0.0061248	0.0767364	39.4129	16.4279
NA	ENSMUSG00000094614	-1.32199	0.00612265	0.0767364	#VALUE!	#VALUE!
Ank3	ENSMUSG00000069601	0.817682	0.00613141	0.0767667	1159.43	672.146
NA	ENSMUSG00000074807	-1.79592	0.00615311	0.0769528	0.743178	12.8991
NA	ENSMUSG00000083433	1.98932	0.00615471	0.0769528	#VALUE!	#VALUE!
Atp5l	ENSMUSG00000038717	-1.46689	0.00617826	0.0771591	24.6908	113.85
Zfp952	ENSMUSG00000053390	-1.59036	0.00617965	0.0771591	5.40881	35.3222
Srrt	ENSMUSG00000037364	1.29231	0.00618608	0.0771866	879.682	419.065
1700088E04Rik	ENSMUSG00000033029	1.05391	0.00619038	0.0771875	114.582	54.8751
Rogdi	ENSMUSG00000022540	1.3555	0.0061981	0.077231	367.257	166.437
NA	ENSMUSG00000063757	-1.6848	0.00621968	0.0774472	#VALUE!	#VALUE!
Col6a1	ENSMUSG00000001119	1.23983	0.00625223	0.0777464	69.3355	32.362
NA	ENSMUSG00000087530	-1.73451	0.00625065	0.0777464	0.895945	6.96483
Mdh1	ENSMUSG00000020321	-1.04148	0.00629629	0.0779671	132.826	286.62
Fgf22	ENSMUSG00000020327	2.24247	0.00630014	0.0779671	3.11485	0.204499
Zswim8	ENSMUSG00000021819	0.929904	0.006295	0.0779671	565.651	311.399
Lpar2	ENSMUSG00000031861	-2.18885	0.00628105	0.0779671	0.0594426	1.21474
Ubn1	ENSMUSG00000039473	1.00632	0.00630839	0.0779671	248.471	123.347
40787	ENSMUSG00000058013	1.48159	0.00630004	0.0779671	38.7941	18.6335
Rai1	ENSMUSG00000062115	1.36111	0.00630654	0.0779671	598.115	223.364
NA	ENSMUSG00000097213	-1.41147	0.00629632	0.0779671	5.81518	18.5661
NA	ENSMUSG00000100603	-2.08427	0.00628926	0.0779671	0.619832	8.0575
Nop58	ENSMUSG00000026020	1.12481	0.00631545	0.0780016	57.1425	26.8961
NA	ENSMUSG00000083545	1.57166	0.0063404	0.0782568	1297.93	570.735
Fndc3b	ENSMUSG00000039286	0.806231	0.00634967	0.0783183	444.491	246.017
Ddx21	ENSMUSG00000020075	1.34673	0.00635804	0.0783493	145.095	62.6306
Bcl9	ENSMUSG00000038256	1.37491	0.00636076	0.0783493	459.891	196.033
Pcgf6	ENSMUSG00000025050	1.16744	0.00636925	0.0783785	69.5796	27.3236
NA	ENSMUSG00000027694	1.48136	0.00637171	0.0783785	228.341	82.5098
Ccdc80	ENSMUSG00000022665	1.37653	0.00637775	0.0784	77.4493	36.058
Iqcd	ENSMUSG00000029601	-2.05248	0.00639407	0.0785477	0.268494	3.76418
Ubxn1	ENSMUSG00000071655	1.55911	0.00641724	0.0787793	305.478	131.794
Cdc42bpb	ENSMUSG00000021279	1.22232	0.00642542	0.0787809	636.71	289.004
NA	ENSMUSG00000095465	2.01609	0.00642599	0.0787809	15.7267	2.46814
Cdc42ep1	ENSMUSG00000049521	1.27245	0.00643516	0.0788404	302.337	150.948
Pop5	ENSMUSG00000060152	-1.62884	0.00645958	0.0790336	3.65737	32.467
B430010I23Rik	ENSMUSG00000084960	1.35002	0.0064575	0.0790336	420.814	193.508
NA	ENSMUSG00000095504	-2.1738	0.00646451	0.0790409	2.52432	39.0081
NA	ENSMUSG00000050066	1.62874	0.00647203	0.0790556	9.17237	3.03046
NA	ENSMUSG00000070896	1.75571	0.00647436	0.0790556	30.0005	7.15199
Celsr3	ENSMUSG00000023473	-1.024	0.00649192	0.0791642	8.2541	19.6841
Tm2d2	ENSMUSG00000031556	-1.7827	0.00648766	0.0791642	0.661702	10.8688
Plac8l1	ENSMUSG00000059455	2.01634	0.00650179	0.0792316	19.8533	2.24501
Tspyl2	ENSMUSG00000041096	1.1099	0.00651808	0.0793772	243.611	109.621
Sart3	ENSMUSG00000018974	1.43839	0.00652831	0.0793958	131.308	55.483
NA	ENSMUSG00000089213	1.64648	0.00652462	0.0793958	1131.83	317.88
NA	ENSMUSG00000101695	-1.76957	0.00653311	0.0794015	1.22398	21.4099
9230104L09Rik	ENSMUSG00000027446	-2.08728	0.00654372	0.0794447	0.479111	4.58287
Prrg1	ENSMUSG00000047996	-1.33268	0.00656183	0.0794447	4.03184	12.8036
NA	ENSMUSG00000085847	-1.41225	0.00655716	0.0794447	47.4739	132.195
NA	ENSMUSG00000087630	-1.49513	0.00654774	0.0794447	4.77087	38.2688
NA	ENSMUSG00000088025	1.69239	0.00656277	0.0794447	167.056	60.0561
NA	ENSMUSG00000090408	1.43101	0.0065574	0.0794447	152.294	62.3886
Acox2	ENSMUSG00000021751	1.89896	0.00656872	0.0794629	3.81643	1.12571
NA	ENSMUSG00000086753	-1.56992	0.00657297	0.0794629	2.96934	32.1171
Actr5	ENSMUSG00000037761	-1.18938	0.00658185	0.0795176	11.2738	34.5869
Parp1	ENSMUSG00000026496	0.993177	0.00661105	0.0797896	65.5228	32.5299
NA	ENSMUSG00000096010	1.92621	0.00661309	0.0797896	11.4611	3.66261
Zfp354a	ENSMUSG00000020364	-1.20374	0.0066193	0.0798117	5.02442	14.4906
Gigyf1	ENSMUSG00000029714	1.40996	0.00664614	0.0800029	242.88	113.368
Bcat1	ENSMUSG00000030268	1.83724	0.00664047	0.0800029	3.18775	1.13401
Zbtb22	ENSMUSG00000051390	1.26725	0.00664829	0.0800029	31.3736	13.662
NA	ENSMUSG00000065864	-2.02088	0.006658	0.080067	7.58171	99.9332
Tnnt2	ENSMUSG00000026414	1.27541	0.00668815	0.0801131	54880.7	27041.1
Zmynd19	ENSMUSG00000026974	-1.9369	0.00668025	0.0801131	0.130982	3.27057
Zfp784	ENSMUSG00000043290	-1.34742	0.00667135	0.0801131	12.7779	32.9487
Cemip	ENSMUSG00000052353	1.54387	0.00668466	0.0801131	9.72626	2.88226
NA	ENSMUSG00000066693	-1.84939	0.00667409	0.0801131	1.74296	26.8614
BC023829	ENSMUSG00000073139	-1.81517	0.0066814	0.0801131	0.631687	5.02986
Etfa	ENSMUSG00000032314	-1.14321	0.00669388	0.0801292	70.6219	168.331
Ccdc51	ENSMUSG00000025645	-1.88681	0.00669936	0.0801422	2.73396	15.5708
Jun	ENSMUSG00000052684	1.11355	0.00674489	0.0806341	237.863	120.022
Ranbp6	ENSMUSG00000074909	-1.18518	0.00675835	0.0806894	18.6163	49.6589
NA	ENSMUSG00000085762	-1.95114	0.00675512	0.0806894	0.526238	19.6101
Endod1	ENSMUSG00000037419	1.64212	0.00676633	0.0807319	9.72892	3.106
Pdgfra	ENSMUSG00000029231	1.77524	0.00677244	0.080752	9.7695	3.96058
St8sia1	ENSMUSG00000030283	1.41845	0.00677854	0.0807721	22.2958	9.42812
Eepd1	ENSMUSG00000036611	1.39277	0.00678335	0.0807767	71.2362	29.6807
Vwa7	ENSMUSG00000007030	1.29524	0.00681339	0.0810816	72.2881	34.5257
Lrrc45	ENSMUSG00000025145	1.34368	0.00683121	0.0811878	177.629	73.7953
NA	ENSMUSG00000086268	-2.19203	0.00682891	0.0811878	1.04275	6.72704
Calr	ENSMUSG00000003814	1.19423	0.00686942	0.0812623	249.776	117.532
Map7	ENSMUSG00000019996	1.44458	0.00686985	0.0812623	165.284	74.3512
4833403I15Rik	ENSMUSG00000024481	-2.1402	0.00684228	0.0812623	0.106691	1.80781
Wdr45b	ENSMUSG00000025173	-1.36026	0.00686486	0.0812623	14.0305	52.0868
Ptgfrn	ENSMUSG00000027864	0.965154	0.0068953	0.0812623	19.0032	9.72138
Eif2b4	ENSMUSG00000029145	1.34009	0.00687489	0.0812623	199.998	98.3698
Tmem126a	ENSMUSG00000030615	-1.54699	0.00689493	0.0812623	11.5389	38.2642
Endov	ENSMUSG00000039850	1.25057	0.00687331	0.0812623	98.1341	48.2006
NA	ENSMUSG00000058443	-1.53938	0.00688448	0.0812623	48.5676	296.229
NA	ENSMUSG00000071637	1.89027	0.00689215	0.0812623	29.8915	10.9495
Nat6	ENSMUSG00000079334	1.12157	0.00685895	0.0812623	120.805	61.5354
BC039771	ENSMUSG00000087594	-1.49723	0.00684891	0.0812623	5.12418	16.239
NA	ENSMUSG00000093716	1.82576	0.00688918	0.0812623	25.9511	5.84944
Impad1	ENSMUSG00000066324	-1.22922	0.00690691	0.0812942	3.27511	9.15697
NA	ENSMUSG00000083774	-1.61146	0.00690495	0.0812942	20.6461	81.2738
Lrrfip1	ENSMUSG00000026305	1.27133	0.00691138	0.0812943	5259.68	2075.26
NA	ENSMUSG00000097099	-1.35871	0.00693039	0.0814655	4.28047	16.0135
2810474O19Rik	ENSMUSG00000032712	0.779812	0.00693893	0.0815135	579.61	319.999
Tm7sf3	ENSMUSG00000040234	1.20803	0.00694588	0.0815427	33.6501	15.2508
Psmc4	ENSMUSG00000030603	1.35482	0.00697583	0.0817891	349.406	160.866
NA	ENSMUSG00000095134	1.4185	0.00697203	0.0817891	1574.13	509.532
Phldb2	ENSMUSG00000033149	1.11268	0.00698837	0.0818602	755.84	304.401
Pnldc1	ENSMUSG00000073460	-1.84695	0.00699086	0.0818602	0.586313	8.80966
Rhobtb3	ENSMUSG00000021589	-0.927017	0.00701271	0.0819585	27.3435	54.1186
Itm2b	ENSMUSG00000022108	-1.11395	0.00701109	0.0819585	59.0444	124.229
Mrpl35	ENSMUSG00000052962	-1.20265	0.00700432	0.0819585	11.1351	25.201
Arid4a	ENSMUSG00000048118	1.13751	0.00702582	0.0820045	373.985	163.779
Arhgap20os	ENSMUSG00000074354	-1.3398	0.00703011	0.0820045	11.8032	42.3244
2310058D17Rik	ENSMUSG00000085379	-0.997544	0.00702939	0.0820045	23.3057	52.8148
Sema3a	ENSMUSG00000028883	-1.70867	0.00703966	0.0820635	1.56232	5.18815
Rnf122	ENSMUSG00000039328	-0.974151	0.00704569	0.0820814	44.9029	91.7939
Stard7	ENSMUSG00000027367	-1.30672	0.00705384	0.0821218	99.0811	342.569
Hist1h2ak	ENSMUSG00000063021	2.20678	0.00705815	0.0821218	4.65639	0.873085
Rad9b	ENSMUSG00000038569	-1.19833	0.00706985	0.0822056	7.83018	23.8243
Rsad2	ENSMUSG00000020641	-2.00799	0.00708707	0.0823534	0.158816	2.68522
Zfp772	ENSMUSG00000066838	-1.47761	0.00710639	0.0825254	3.86244	13.6555
Atf6b	ENSMUSG00000015461	1.3905	0.0071534	0.0826286	172.127	69.0018
Ccdc136	ENSMUSG00000029769	1.2616	0.00717252	0.0826286	88.3788	37.7581
Hdac6	ENSMUSG00000031161	1.13155	0.00713035	0.0826286	74.8839	36.919
Rbm4b	ENSMUSG00000033760	-1.05294	0.00714444	0.0826286	135.335	321.004
Krba1	ENSMUSG00000042810	1.27135	0.00716932	0.0826286	537.895	270.463
Upf2	ENSMUSG00000043241	1.13043	0.0071657	0.0826286	273.811	132.232
Rnf222	ENSMUSG00000046490	-2.08692	0.00713387	0.0826286	0.0860433	1.4462
Eif3b	ENSMUSG00000056076	1.04292	0.0071536	0.0826286	72.4712	31.3941
Eda	ENSMUSG00000059327	-1.60413	0.00714461	0.0826286	0.369617	2.74293
Eno3	ENSMUSG00000060600	-0.803256	0.00717137	0.0826286	538.56	984.802
Ubr4	ENSMUSG00000066036	1.17707	0.00716122	0.0826286	513.867	261.49
NA	ENSMUSG00000068466	1.95595	0.00713072	0.0826286	18.3179	3.49183
NA	ENSMUSG00000100010	2.16985	0.00717409	0.0826286	8.91946	1.37734
Camta1	ENSMUSG00000014592	0.743977	0.00718763	0.0827324	967.324	570.982
Lrp1	ENSMUSG00000040249	1.17847	0.00721619	0.0830089	95.8958	47.4116
Ctif	ENSMUSG00000052928	1.32254	0.00722249	0.083029	54.6873	23.8429
NA	ENSMUSG00000085672	-1.94488	0.00725539	0.0833548	1.4323	23.724
Col5a1	ENSMUSG00000026837	0.881185	0.00726563	0.08342	85.4736	45.5929
Hn1l	ENSMUSG00000024165	1.09277	0.00727025	0.0834206	15.9389	7.39941
Nol10	ENSMUSG00000061458	0.980044	0.00728677	0.083478	73.2765	36.0076
NA	ENSMUSG00000080974	1.83131	0.00728292	0.083478	45.4215	5.5516
NA	ENSMUSG00000097722	-1.6233	0.00728896	0.083478	1.91322	15.9719
NA	ENSMUSG00000081243	1.98843	0.00730604	0.0836212	44.6375	6.93901
NA	ENSMUSG00000061479	1.13144	0.0073118	0.0836347	325.292	163.975
NA	ENSMUSG00000097422	-1.98498	0.00732799	0.0837674	0.326759	2.10413
Abca12	ENSMUSG00000050296	-1.40209	0.00734109	0.0838647	1.42905	6.86305
Mccc1	ENSMUSG00000027709	-0.865045	0.0073567	0.0839905	87.4885	172.695
Sfswap	ENSMUSG00000029439	1.32223	0.00739364	0.0843388	657.939	316.422
Zc3h6	ENSMUSG00000042851	1.38588	0.00740106	0.0843388	45.4782	22.1981
NA	ENSMUSG00000092741	1.30681	0.0073985	0.0843388	1377.79	591.919
Nup35	ENSMUSG00000026999	-1.51696	0.00741164	0.0844067	1.66951	7.31715
Cpox	ENSMUSG00000022742	-1.45751	0.00741702	0.0844154	7.22695	23.1792
Fam160b2	ENSMUSG00000022095	1.03296	0.00743537	0.0845715	626.109	286.596
NA	ENSMUSG00000096243	2.1882	0.00745251	0.0847137	73.2045	4.21493
Cnksr1	ENSMUSG00000028841	0.976401	0.00746309	0.0847812	799.355	408.29
Hes1	ENSMUSG00000022528	0.873836	0.0074731	0.0847895	150.21	79.7852
NA	ENSMUSG00000101308	-1.90497	0.00747027	0.0847895	0.73757	4.83069
Hmg20b	ENSMUSG00000020232	1.11565	0.00749388	0.084865	488.464	224.825
Grina	ENSMUSG00000022564	1.17131	0.00751851	0.084865	741.862	316.642
Polr1b	ENSMUSG00000027395	1.45603	0.00752621	0.084865	43.9549	18.4261
Ttyh1	ENSMUSG00000030428	1.13685	0.00748761	0.084865	28.4685	13.0255
Csgalnact1	ENSMUSG00000036356	-1.91799	0.00749653	0.084865	0.256498	2.89307
Ccr4	ENSMUSG00000047898	2.15698	0.00751644	0.084865	1.06505	0.126635
Lepr	ENSMUSG00000057722	-1.83251	0.00751719	0.084865	0.244371	2.02069
Pyroxd2	ENSMUSG00000060224	1.03822	0.00752314	0.084865	495.136	245.797
NA	ENSMUSG00000083218	0.994655	0.00750234	0.084865	157.389	82.5406
NA	ENSMUSG00000088170	-1.67939	0.00751098	0.084865	21.361	163.944
NA	ENSMUSG00000091290	2.01224	0.00753323	0.0848917	23.7567	3.44765
Serpinb8	ENSMUSG00000026315	1.53021	0.00753804	0.0848935	4.30294	1.66247
Abcc5	ENSMUSG00000022822	1.07876	0.00754442	0.0849131	833.938	422.596
Rbm33	ENSMUSG00000048271	1.18644	0.00756396	0.0850806	320.161	161.237
Snn	ENSMUSG00000037972	-1.58274	0.00757144	0.0851123	1.97418	17.6817
Mina	ENSMUSG00000022724	-1.16166	0.00757865	0.0851139	49.0829	102.234
Yipf7	ENSMUSG00000029158	-1.28463	0.0075809	0.0851139	44.2629	112.383
Mov10l1	ENSMUSG00000015365	-1.48102	0.00764128	0.085529	4.71547	25.7337
Mrpl19	ENSMUSG00000030045	-1.51554	0.0076296	0.085529	2.74372	13.692
Rbm20	ENSMUSG00000043639	1.1221	0.00763573	0.085529	7318.22	3502.59
BC049635	ENSMUSG00000050141	-2.13359	0.00764019	0.085529	0.220457	2.52452
NA	ENSMUSG00000086740	1.27203	0.00763378	0.085529	220.952	105.206
Npc1l1	ENSMUSG00000020447	1.39631	0.00764884	0.0855612	11.8108	5.26203
Med17	ENSMUSG00000031935	-1.03235	0.00766685	0.0857101	15.7148	32.1892
NA	ENSMUSG00000061897	1.0227	0.00767903	0.0857938	304.379	145.194
NA	ENSMUSG00000034427	1.85204	0.00769751	0.0858952	2.136	0.40091
Magi1	ENSMUSG00000045095	1.2175	0.00769733	0.0858952	361.077	171.283
Fgf6	ENSMUSG00000000183	1.16695	0.00770566	0.0859131	18.4312	8.54142
Vim	ENSMUSG00000026728	1.38215	0.00771367	0.0859131	151.818	75.4757
Zfp128	ENSMUSG00000060397	-1.64339	0.00771793	0.0859131	1.48424	21.188
NA	ENSMUSG00000090889	1.54796	0.00771355	0.0859131	85451.5	31711.1
Tmem206	ENSMUSG00000026627	-1.09284	0.00773195	0.0859644	8.95795	19.2937
NA	ENSMUSG00000097303	1.91661	0.00772839	0.0859644	17.3418	6.79261
Gm15941	ENSMUSG00000086992	-1.95986	0.00774051	0.0860073	0.239964	3.57768
Kif3c	ENSMUSG00000020668	1.0516	0.00776636	0.086242	19.7331	9.34055
Tmem2	ENSMUSG00000024754	1.10281	0.00780908	0.0864966	32.0793	12.9662
Cd28	ENSMUSG00000026012	-1.47022	0.0078177	0.0864966	1.66766	7.43308
Rad51ap1	ENSMUSG00000030346	1.80261	0.00780082	0.0864966	5.92569	0.699728
Zfp692	ENSMUSG00000037243	1.18689	0.00780773	0.0864966	207.098	105.781
Atl2	ENSMUSG00000059811	-1.10911	0.00781404	0.0864966	32.1298	81.932
NA	ENSMUSG00000083410	-1.98984	0.00781762	0.0864966	0.472682	10.1687
Far2	ENSMUSG00000030303	-1.72441	0.00783468	0.086632	2.31799	8.45674
Rai14	ENSMUSG00000022246	0.970379	0.00784578	0.0866499	23.7071	11.9428
Ppargc1b	ENSMUSG00000033871	1.33337	0.00784192	0.0866499	1116.37	566.71
Gcfc2	ENSMUSG00000035125	-1.42508	0.00785138	0.0866594	6.64156	30.888
Abi1	ENSMUSG00000058835	0.741911	0.00786744	0.0867841	168.577	101.034
Cyb5b	ENSMUSG00000031924	-1.01746	0.00788534	0.0868271	36.1291	76.8918
Cox7a2	ENSMUSG00000032330	-1.71619	0.00789035	0.0868271	5.22382	73.6269
Pde4dip	ENSMUSG00000038170	1.22786	0.00788801	0.0868271	17715.7	8456.44
Zfp653	ENSMUSG00000038895	1.05789	0.00788705	0.0868271	115.04	56.4923
Ctu1	ENSMUSG00000038888	-2.08245	0.0079089	0.0869789	0.0916546	4.12385
4931406B18Rik	ENSMUSG00000013353	1.74458	0.00792811	0.0870852	4.29534	1.37755
I830012O16Rik	ENSMUSG00000062488	-1.50149	0.00792657	0.0870852	2.87516	21.6915
NA	ENSMUSG00000084897	-1.90098	0.00794455	0.0871611	0.479706	3.72995
NA	ENSMUSG00000094382	-2.05536	0.0079399	0.0871611	2.37058	72.8209
Rfwd3	ENSMUSG00000033596	-0.944734	0.00795512	0.0871723	32.563	65.8916
Daam2	ENSMUSG00000040260	1.1196	0.0079516	0.0871723	17.536	7.45501
NA	ENSMUSG00000099858	-1.61845	0.00797812	0.0873718	5.13454	17.2587
Pigl	ENSMUSG00000014245	1.19864	0.00798953	0.0874445	142.301	70.882
AI837181	ENSMUSG00000047423	1.2931	0.00803354	0.0878209	73.8603	31.1354
NA	ENSMUSG00000099694	-1.90557	0.00803188	0.0878209	1.06543	20.3406
NA	ENSMUSG00000096850	-1.85489	0.00809465	0.0884359	4.68534	45.7132
Mical3	ENSMUSG00000003178	0.833665	0.00811241	0.0885006	#VALUE!	#VALUE!
Ercc1	ENSMUSG00000003549	1.28436	0.00812963	0.0885006	139.263	64.0023
Lrrtm2	ENSMUSG00000071862	-0.978865	0.00812901	0.0885006	50.6836	106.141
NA	ENSMUSG00000080396	-1.9843	0.00811873	0.0885006	7.45824	83.3458
NA	ENSMUSG00000083827	-1.25293	0.00812439	0.0885006	43.6581	128.967
NA	ENSMUSG00000088366	-2.07435	0.00811068	0.0885006	1.15637	20.4691
Fgfr1	ENSMUSG00000031565	1.04163	0.0081472	0.0885863	192.446	89.1877
Myl3	ENSMUSG00000059741	-0.596067	0.0081457	0.0885863	691.763	1061.07
Mical1	ENSMUSG00000019823	1.26722	0.0081612	0.0886558	44.3774	16.9432
Tbc1d10b	ENSMUSG00000042492	1.38467	0.00816331	0.0886558	71.5939	33.3928
Dvl3	ENSMUSG00000003233	1.0566	0.0081828	0.088762	744.194	395.536
Rassf1	ENSMUSG00000010067	0.926264	0.00818111	0.088762	71.0666	36.7292
Mark2	ENSMUSG00000024969	1.24612	0.00820629	0.088964	676.926	336.369
Slc9a4	ENSMUSG00000026065	-1.83069	0.00822551	0.089039	0.238394	3.13811
NA	ENSMUSG00000057829	1.13366	0.00822784	0.089039	151.382	64.6987
NA	ENSMUSG00000087569	1.45973	0.00822478	0.089039	27.7975	11.9031
Mapkbp1	ENSMUSG00000033902	0.977559	0.00825692	0.0893008	105.131	56.5481
Yy1	ENSMUSG00000021264	1.30637	0.00826227	0.0893058	139.115	69.3468
Usp11	ENSMUSG00000031066	1.20362	0.00828141	0.0893541	14.9746	5.90387
Lrfn5	ENSMUSG00000035653	1.98062	0.00827913	0.0893541	1.80779	0.19346
NA	ENSMUSG00000070342	-1.77858	0.0082759	0.0893541	2.61548	54.0207
NA	ENSMUSG00000027551	1.15178	0.00828972	0.089391	180.925	90.055
Ddx23	ENSMUSG00000003360	1.11049	0.00829948	0.0894435	209.379	107.764
Rsl24d1	ENSMUSG00000032215	-1.41883	0.00834088	0.0898257	15.0879	55.5181
Gm15663	ENSMUSG00000085282	1.94795	0.00834478	0.0898257	3.63708	0.840883
Plin4	ENSMUSG00000002831	1.19631	0.00835603	0.08986	2235.37	1097.8
NA	ENSMUSG00000078866	-1.01911	0.00835781	0.08986	23.6204	55.6272
Nav1	ENSMUSG00000009418	1.15714	0.00837117	0.0898978	64.0214	31.5283
Syvn1	ENSMUSG00000024807	0.939215	0.00837064	0.0898978	324.907	170.326
Cbx5	ENSMUSG00000009575	-1.15202	0.00840598	0.0902186	22.5776	56.9334
Taf3	ENSMUSG00000025782	0.977103	0.00841336	0.090242	206.605	106.687
Rfxap	ENSMUSG00000036615	1.40945	0.00842298	0.090242	41.1331	16.2806
NA	ENSMUSG00000055370	-1.46121	0.00842165	0.090242	11.952	58.0613
Slc6a20b	ENSMUSG00000025243	-1.32942	0.00843969	0.0902621	7.47086	29.6966
6530409C15Rik	ENSMUSG00000043340	-1.38365	0.00843447	0.0902621	9.1182	33.8123
NA	ENSMUSG00000063524	0.687295	0.00843782	0.0902621	966.731	605.275
Prdm2	ENSMUSG00000057637	0.72837	0.00844625	0.0902795	248.298	147.941
Ice1	ENSMUSG00000034525	1.03833	0.00846961	0.0904084	1015.75	514.576
Dtx3	ENSMUSG00000040415	1.05722	0.00847316	0.0904084	535.577	247.012
NA	ENSMUSG00000091968	2.14236	0.00846515	0.0904084	2.13882	0.396896
Greb1	ENSMUSG00000036523	1.93454	0.00848332	0.090464	1.33786	0.511386
LOC381967	ENSMUSG00000097015	1.70713	0.0085051	0.0906433	19.8955	7.07463
NA	ENSMUSG00000030664	-1.70797	0.00852278	0.0906789	20.9931	132.88
Gm15713	ENSMUSG00000085499	-1.21194	0.0085142	0.0906789	80.2907	188.323
Pet100	ENSMUSG00000087687	1.1743	0.00852333	0.0906789	63.7131	27.7678
Irx3	ENSMUSG00000031734	1.46699	0.00854168	0.0908213	51.1243	21.7098
Fam134a	ENSMUSG00000049339	1.68176	0.00855158	0.0908736	26.5334	14.1816
NA	ENSMUSG00000081152	1.01865	0.0085636	0.0909485	337.627	172
Zfp385a	ENSMUSG00000000552	1.42874	0.00860015	0.0911719	54.8998	24.3146
Mapk7	ENSMUSG00000001034	1.19676	0.00860257	0.0911719	44.9127	16.5887
Eif3a	ENSMUSG00000024991	1.07551	0.00860549	0.0911719	1397.91	656.608
Ampd2	ENSMUSG00000027889	1.18388	0.00861459	0.0911719	25.3565	11.3967
NA	ENSMUSG00000074781	-1.54815	0.00860077	0.0911719	4.70399	29.7386
NA	ENSMUSG00000085361	-1.79971	0.00861004	0.0911719	4.81976	62.5728
Romo1	ENSMUSG00000067847	-1.75746	0.00864463	0.0913839	3.04907	34.6397
NA	ENSMUSG00000091312	1.53646	0.00864104	0.0913839	414.21	90.3239
Itgb2	ENSMUSG00000000290	2.02624	0.00866128	0.091507	2.197	2.45172
NA	ENSMUSG00000085300	1.1546	0.00868812	0.0917375	531.028	226.49
NA	ENSMUSG00000095762	-1.68217	0.00869358	0.0917421	5.53465	39.7603
Hip1r	ENSMUSG00000000915	1.40751	0.00876436	0.0923437	57.8517	23.7328
Fuca1	ENSMUSG00000028673	-1.07161	0.00876922	0.0923437	25.0355	63.9617
Polg	ENSMUSG00000039176	0.915448	0.00877081	0.0923437	60.4971	32.0428
NA	ENSMUSG00000086298	-1.60112	0.00875663	0.0923437	5.81951	43.0601
Ccdc9	ENSMUSG00000041375	1.445	0.00883907	0.0930088	219.357	99.1344
NA	ENSMUSG00000081101	1.51454	0.00884703	0.093039	191.808	53.6768
Ccdc55	ENSMUSG00000037958	1.47569	0.00888892	0.0934258	313.263	140.482
Gnl2	ENSMUSG00000028869	1.06234	0.00891946	0.0936928	560.188	247.631
Mfng	ENSMUSG00000018169	-2.07186	0.00894783	0.0939368	0.120838	6.62343
NA	ENSMUSG00000085793	-1.51419	0.00895701	0.0939791	3.84788	27.358
Mtch2	ENSMUSG00000027282	-0.982643	0.00896667	0.0940265	92.3408	181.215
Rad52	ENSMUSG00000030166	1.20684	0.00897512	0.0940611	206.603	101.207
NA	ENSMUSG00000097902	-1.6207	0.0089961	0.0942269	3.93526	41.589
Zscan22	ENSMUSG00000054715	-1.49072	0.00904693	0.094705	7.01194	38.4595
Crebbp	ENSMUSG00000022521	0.914547	0.00908208	0.0949649	546.254	297.222
Plxnb1	ENSMUSG00000053646	-0.875011	0.00908216	0.0949649	65.9655	120.685
Ccdc63	ENSMUSG00000043036	-1.15584	0.00910415	0.0951405	10.8748	25.4422
Col5a3	ENSMUSG00000004098	1.65133	0.00913871	0.0953297	22.1572	4.9499
Mpc1	ENSMUSG00000023861	-1.0416	0.00912787	0.0953297	125.996	296.587
Gpr68	ENSMUSG00000047415	1.09085	0.00914314	0.0953297	73.8476	38.1906
NA	ENSMUSG00000088371	1.80198	0.00913393	0.0953297	211.531	29.0081
Degs2	ENSMUSG00000021263	-1.8388	0.00916863	0.095541	0.549373	4.77155
Hist1h1e	ENSMUSG00000051627	1.60003	0.00917518	0.0955547	334.152	101.594
Bend4	ENSMUSG00000092060	1.6652	0.00920217	0.0957812	17.9217	8.6108
NA	ENSMUSG00000099697	-1.36437	0.00920986	0.0958067	#VALUE!	#VALUE!
Brpf3	ENSMUSG00000063952	0.967818	0.00922667	0.0958723	113.772	57.6413
NA	ENSMUSG00000085842	-1.73411	0.00922498	0.0958723	0.548503	5.96721
Gak	ENSMUSG00000062234	1.11379	0.00924204	0.0959774	349.195	181.45
Snrnp70	ENSMUSG00000063511	1.0507	0.00925648	0.0960728	2226.05	1180.85
Neo1	ENSMUSG00000032340	-0.839708	0.00926901	0.0961482	87.7584	159.348
NA	ENSMUSG00000084630	-1.49411	0.00927642	0.0961705	17.0717	263.634
Pkd1	ENSMUSG00000032855	1.05169	0.00929288	0.0962865	173.656	92.0037
Serpina3n	ENSMUSG00000021091	1.28836	0.0093206	0.0964096	98.9076	36.214
Map3k15	ENSMUSG00000031303	-1.49867	0.00931564	0.0964096	1.59952	12.6198
Rapgef1	ENSMUSG00000039844	0.900626	0.00931599	0.0964096	453.511	241.049
NA	ENSMUSG00000087684	1.4701	0.0093424	0.0965804	11.2844	2.72727
Zfp553	ENSMUSG00000045598	1.37628	0.00935405	0.0965976	69.792	32.7498
NA	ENSMUSG00000064352	-1.99057	0.00935464	0.0965976	3.75936	52.3609
Zfp827	ENSMUSG00000071064	1.24511	0.00936226	0.0966217	626.305	289.451
Gps2	ENSMUSG00000023170	1.17146	0.00941313	0.0968236	588.276	256.903
Slc28a1	ENSMUSG00000025726	2.03041	0.00942239	0.0968236	1.55456	0.348313
Qsox1	ENSMUSG00000033684	0.833864	0.00941626	0.0968236	394.562	224.385
LOC101055707	ENSMUSG00000044407	1.78038	0.00942423	0.0968236	#VALUE!	#VALUE!
Ghr	ENSMUSG00000055737	-0.704557	0.00939747	0.0968236	290.674	477.558
Rmdn3	ENSMUSG00000070730	-0.999117	0.00939925	0.0968236	26.8719	56.1043
NA	ENSMUSG00000081553	1.06304	0.0094228	0.0968236	126.744	60.4637
NA	ENSMUSG00000097625	-1.26065	0.00939028	0.0968236	29.9201	72.4504
R3hdm2	ENSMUSG00000025404	1.13086	0.00946439	0.0971816	726.255	354.393
Mvk	ENSMUSG00000041939	1.72487	0.00947656	0.0972518	29.2288	10.4273
Lifr	ENSMUSG00000054263	-0.918237	0.00949124	0.0973478	52.1522	98.0006
Tgfbr3l	ENSMUSG00000089736	-1.81575	0.00950434	0.0974275	0.265485	3.29523
Bicd2	ENSMUSG00000037933	0.935041	0.00953644	0.0977017	529.974	288.741
Scyl1	ENSMUSG00000024941	1.19179	0.00954316	0.0977158	231.291	118.312
Aebp1	ENSMUSG00000020473	1.47975	0.00956425	0.0978769	35.3659	11.8844
Mvp	ENSMUSG00000030681	1.16003	0.00959841	0.0980651	146.145	70.4887
Pmepa1	ENSMUSG00000038400	0.898792	0.00959875	0.0980651	88.4927	49.9478
LOC102635502	ENSMUSG00000079669	1.92218	0.00959292	0.0980651	6.79748	1.2354
2410015M20Rik	ENSMUSG00000049760	-2.03039	0.00961095	0.0981348	0.561707	13.5371
Ahi1	ENSMUSG00000019986	0.898404	0.00963524	0.0981925	98.5923	49.0005
Slc27a3	ENSMUSG00000027932	-1.98684	0.00964885	0.0981925	0.185927	4.11157
Sult1a1	ENSMUSG00000030711	-1.22475	0.00962267	0.0981925	15.2872	36.5806
Uhrf1bp1	ENSMUSG00000039512	0.996488	0.00964513	0.0981925	116.005	63.7982
Hecw2	ENSMUSG00000042807	0.801981	0.00963422	0.0981925	63.5039	36.7213
NA	ENSMUSG00000093734	-1.52964	0.00964081	0.0981925	14.9747	117.914
NA	ENSMUSG00000022421	1.82706	0.00967035	0.0983201	4.68947	0.488695
Srrm1	ENSMUSG00000028809	1.20281	0.00967215	0.0983201	3305.76	1531.76
Fbxo9	ENSMUSG00000001366	-0.856593	0.00973794	0.0989338	106.633	202.73
Swsap1	ENSMUSG00000051238	-1.82771	0.00975539	0.099056	0.523959	6.36765
2200002D01Rik	ENSMUSG00000030587	1.20399	0.00977898	0.0992404	72.1917	32.6011
Stat6	ENSMUSG00000002147	0.75095	0.00981799	0.0992503	227.933	133.401
Ybx3	ENSMUSG00000030189	1.15681	0.00981083	0.0992503	258.37	113.205
Pkm	ENSMUSG00000032294	1.06941	0.00980265	0.0992503	1377.28	746.745
Szt2	ENSMUSG00000033253	1.24588	0.00981266	0.0992503	291.38	146.056
NA	ENSMUSG00000085625	1.54765	0.00981452	0.0992503	102.237	51.3757
Rbm4	ENSMUSG00000094936	-1.33346	0.00981093	0.0992503	20.8707	56.0679
E230013L22Rik	ENSMUSG00000096957	1.07433	0.00981494	0.0992503	111.259	51.8982
NA	ENSMUSG00000093419	-1.94954	0.0098335	0.099352	1.68614	28.4894
Ogn	ENSMUSG00000021390	-1.33658	0.00984182	0.0993812	13.6539	56.3294
Myt1	ENSMUSG00000010505	1.71474	0.00986287	0.0994948	2.7931	0.973045
Snai1	ENSMUSG00000042821	1.70816	0.00987486	0.0994948	8.37669	2.27049
Socs3	ENSMUSG00000053113	1.76272	0.00986799	0.0994948	84.1936	25.3624
NA	ENSMUSG00000084168	-1.30211	0.00987089	0.0994948	31.2162	89.3402
Mid1	ENSMUSG00000035299	1.29086	0.00989414	0.0996341	1484.95	467.812
Dock1	ENSMUSG00000058325	0.801136	0.00990983	0.0996822	121.148	69.5806
NA	ENSMUSG00000097887	-1.52466	0.00990547	0.0996822	1.47955	22.8618
Pbx1	ENSMUSG00000052534	-0.581862	0.00995762	0.100108	196.733	291.2
Parp3	ENSMUSG00000023249	0.792788	0.0099674	0.100151	510.896	291.523
Cblb	ENSMUSG00000022637	1.13592	0.00998607	0.100247	367.134	197.405
Slc30a10	ENSMUSG00000026614	2.03521	0.0099879	0.100247	0.53737	0.247728
Grhl1	ENSMUSG00000020656	1.33076	0.0100048	0.100306	148.077	40.9958
Smarca4	ENSMUSG00000032187	1.28888	0.0100024	0.100306	535.084	244.083
Tmc4	ENSMUSG00000019734	-1.31714	0.0100162	0.100365	9.06635	19.5355
Evi5l	ENSMUSG00000011832	0.984927	0.0100302	0.100395	112.051	58.3021
Ube2o	ENSMUSG00000020802	1.28053	0.0100285	0.100395	203.07	92.1082
Pxdc1	ENSMUSG00000021411	1.33051	0.0100362	0.1004	25.1337	9.12545
Srm	ENSMUSG00000006442	1.21578	0.0100664	0.100441	76.3445	33.4896
Chd7	ENSMUSG00000041235	1.2093	0.01006	0.100441	620.067	299.855
Rab9	ENSMUSG00000079316	-1.58733	0.0100533	0.100441	3.98256	35.8977
Rab7	ENSMUSG00000079477	1.12468	0.0100678	0.100441	1253.94	619.466
NA	ENSMUSG00000087294	-1.89055	0.0100634	0.100441	0.74506	12.5651
Ace	ENSMUSG00000020681	1.18765	0.0100766	0.100474	33.1234	15.801
5430402O13Rik	ENSMUSG00000085776	-1.82881	0.0100834	0.100488	0.872161	10.2303
NA	ENSMUSG00000088310	1.41903	0.0100995	0.100538	494.386	186.512
Zfp799	ENSMUSG00000095253	-1.16858	0.0100993	0.100538	19.1946	46.4086
Armc1	ENSMUSG00000027599	-1.05908	0.0101196	0.100628	13.9131	27.9421
Palld	ENSMUSG00000058056	0.902054	0.0101193	0.100628	2716.08	1506.82
Uqcrc2	ENSMUSG00000030884	-0.882521	0.0101299	0.100667	131.36	269.73
NA	ENSMUSG00000074506	-1.60304	0.0101345	0.100667	3.86991	39.4288
NA	ENSMUSG00000066170	-1.50736	0.0101504	0.100771	1.04626	7.1212
Fam219a	ENSMUSG00000028439	1.31471	0.0101702	0.100912	61.4662	25.9446
Tfap2a	ENSMUSG00000021359	1.8647	0.0101954	0.100942	3.51856	0.732505
Aaas	ENSMUSG00000036678	1.34294	0.0101938	0.100942	118.223	54.749
Arhgef11	ENSMUSG00000041977	0.961456	0.0101949	0.100942	199.546	100.71
NA	ENSMUSG00000098224	-1.56586	0.0101852	0.100942	14.9126	97.6018
NA	ENSMUSG00000086410	2.04625	0.0102128	0.101002	4.05956	2.42382
NA	ENSMUSG00000087040	-1.64346	0.0102142	0.101002	0.682177	3.93199
NA	ENSMUSG00000097081	-1.89448	0.010218	0.101002	0.186287	2.12169
Gpr157	ENSMUSG00000047875	-1.05863	0.010227	0.101037	75.9023	174.111
Ctxn1	ENSMUSG00000048644	-1.99976	0.0102337	0.101048	0.382643	6.92215
Serpina9	ENSMUSG00000058260	1.55157	0.0102786	0.101436	10.1343	4.11685
Ablim3	ENSMUSG00000032735	1.22808	0.010285	0.101445	41.8224	16.4455
Uvrag	ENSMUSG00000035354	-0.649122	0.0102928	0.101467	30.6156	49.3761
Synpo2	ENSMUSG00000050315	1.13274	0.0103105	0.101586	338.051	162.997
Tmem47	ENSMUSG00000025666	-1.81858	0.0103167	0.101593	0.505719	3.16604
Ppp1r10	ENSMUSG00000039220	1.07444	0.0103688	0.102051	314.097	166.912
Atxn7	ENSMUSG00000021738	0.912667	0.0103847	0.102103	356.495	196.829
Ech1	ENSMUSG00000053898	-1.22637	0.0103876	0.102103	75.1135	216.563
NA	ENSMUSG00000064339	1.2724	0.0103908	0.102103	95333.1	42501.6
Rere	ENSMUSG00000039852	1.0569	0.0103969	0.102108	553.758	284.725
Mprip	ENSMUSG00000005417	0.949623	0.0104418	0.102434	501.95	263.166
Nfe2l1	ENSMUSG00000038615	0.927415	0.0104395	0.102434	477.078	270.844
Cldn20	ENSMUSG00000091530	-1.71877	0.0104469	0.102434	3.35005	33.9777
NA	ENSMUSG00000087535	1.53282	0.0104714	0.102619	25.9147	10.5593
Dbnl	ENSMUSG00000020476	1.20862	0.0104959	0.102749	215.601	108.976
NA	ENSMUSG00000084093	-1.75877	0.0104957	0.102749	6.7297	73.8195
Pml	ENSMUSG00000036986	0.972257	0.0105362	0.103088	62.5969	31.4592
Ctdp1	ENSMUSG00000033323	1.13138	0.0105649	0.103314	146.741	76.7666
NA	ENSMUSG00000100235	-1.6527	0.010573	0.103337	0.762092	6.91279
Ccdc84	ENSMUSG00000043923	0.968394	0.0105983	0.103428	161.365	84.0919
Cldn12	ENSMUSG00000046798	-0.792268	0.0105993	0.103428	25.2462	44.9295
2610305D13Rik	ENSMUSG00000066000	1.84533	0.0105881	0.103428	4.58052	2.02712
Synpo2l	ENSMUSG00000039376	0.99526	0.0106128	0.103504	1512.45	755.485
NA	ENSMUSG00000094463	1.39193	0.0106202	0.103522	39.86	17.1296
Gadd45g	ENSMUSG00000021453	1.00239	0.0106383	0.103566	537.957	239.362
Ncl	ENSMUSG00000026234	1.2488	0.0106368	0.103566	301.013	135.164
Adamtsl5	ENSMUSG00000043822	0.691195	0.0106418	0.103566	2428.01	1498.83
Tmem198b	ENSMUSG00000047090	1.18188	0.010683	0.103912	9.57337	4.02161
Nit1	ENSMUSG00000013997	-0.746154	0.0107277	0.104072	30.566	53.7778
Itsn2	ENSMUSG00000020640	1.15933	0.0107204	0.104072	552.78	275.772
Podn	ENSMUSG00000028600	1.41018	0.010736	0.104072	288.865	99.4
Flywch1	ENSMUSG00000040097	1.26801	0.010738	0.104072	146.214	73.205
Clasrp	ENSMUSG00000061028	1.04655	0.0107394	0.104072	218.976	113.906
NA	ENSMUSG00000064622	-1.81965	0.0107251	0.104072	3.79337	95.1703
NA	ENSMUSG00000102029	-1.76828	0.0107226	0.104072	0.83504	11.4729
Shank3	ENSMUSG00000022623	1.34626	0.0107456	0.104077	35.5084	15.8307
Tmem128	ENSMUSG00000067365	-1.15824	0.0107628	0.104188	5.58024	13.3498
Cd24a	ENSMUSG00000047139	1.95093	0.0107881	0.104378	9.47102	0.778748
Pigs	ENSMUSG00000041958	0.973137	0.0108041	0.104423	51.2718	23.8107
Nhlrc1	ENSMUSG00000044231	-1.73037	0.0108023	0.104423	0.408928	4.95843
NA	ENSMUSG00000100510	-0.728153	0.0108286	0.104604	1011.98	1684.22
Brd4	ENSMUSG00000024002	1.14023	0.0108542	0.104761	763.106	379.156
Scn4b	ENSMUSG00000046480	-1.54491	0.0108563	0.104761	0.971668	7.27527
Rhpn2	ENSMUSG00000030494	1.33462	0.0108676	0.104814	25.4996	6.87299
Nek9	ENSMUSG00000034290	1.18632	0.0108765	0.104824	194.421	104.585
Zmynd8	ENSMUSG00000039671	1.2461	0.0108838	0.104824	1054.97	547.851
Ccr10	ENSMUSG00000044052	-1.65208	0.0108858	0.104824	0.586511	8.14367
Snapin	ENSMUSG00000001018	-1.1217	0.0108968	0.104838	56.1438	155.019
4930556N13Rik	ENSMUSG00000092399	-1.32538	0.0108987	0.104838	4.06724	24.6684
Fbxl18	ENSMUSG00000066640	1.25049	0.0109188	0.104976	57.8282	29.2059
Tssc4	ENSMUSG00000045752	1.19872	0.010928	0.104998	33.3795	14.0454
Brd9	ENSMUSG00000057649	1.2238	0.0109383	0.104998	697.805	285.459
NA	ENSMUSG00000097459	-2.07655	0.0109346	0.104998	0.690856	8.36181
Fancd2	ENSMUSG00000034023	1.99005	0.0109686	0.105178	1.66184	0.231453
Erbb4	ENSMUSG00000062209	-0.938273	0.0109681	0.105178	25.2182	50.465
Atrn	ENSMUSG00000027312	-0.696474	0.0109836	0.105213	57.8079	96.7129
Nol6	ENSMUSG00000028430	0.915472	0.0109838	0.105213	56.9147	30.6275
Ubap1	ENSMUSG00000028437	-1.0466	0.011015	0.105456	38.3836	73.0072
Dopey2	ENSMUSG00000022946	1.10796	0.0110403	0.105532	103.27	48.0584
Zbtb38	ENSMUSG00000040433	0.888644	0.0110348	0.105532	674.276	373.526
Mia3	ENSMUSG00000056050	0.882707	0.0110359	0.105532	513.865	293.086
NA	ENSMUSG00000097859	-1.0095	0.0110541	0.105609	53.7325	115.905
Pigx	ENSMUSG00000023791	-1.4004	0.0110645	0.105618	17.2597	54.0755
NA	ENSMUSG00000086506	-1.68254	0.0110665	0.105618	0.73665	10.273
Art1	ENSMUSG00000030996	-0.771003	0.0110867	0.105638	351.41	630.296
Cnot3	ENSMUSG00000035632	1.33677	0.0110813	0.105638	385.392	200.243
NA	ENSMUSG00000059040	0.971918	0.0110918	0.105638	716.85	367.292
NA	ENSMUSG00000096160	1.83251	0.0110799	0.105638	13.4161	5.96399
Ptbp1	ENSMUSG00000006498	0.936411	0.0110997	0.105658	231.77	125.162
Calhm2	ENSMUSG00000033033	-1.64197	0.0111182	0.105779	1.54644	21.4284
Tmem164	ENSMUSG00000047045	-0.885972	0.0111749	0.106208	37.6713	67.9994
NA	ENSMUSG00000082896	1.29028	0.0111747	0.106208	207.034	79.1011
Shb	ENSMUSG00000044813	1.12062	0.0111851	0.10625	318.639	163.607
Dgcr14	ENSMUSG00000003527	1.34282	0.0111932	0.106271	112.117	53.3921
Rnasel	ENSMUSG00000066800	1.26521	0.0112253	0.106521	27.2495	13.207
Necap2	ENSMUSG00000028923	1.09698	0.0112414	0.106563	110.915	57.0809
Cckar	ENSMUSG00000029193	1.14824	0.0112364	0.106563	33.5335	17.1107
Smpd3	ENSMUSG00000031906	-1.44894	0.011253	0.106617	1.42935	5.08332
Fh1	ENSMUSG00000026526	-0.985096	0.0112625	0.106653	37.3555	83.2609
NA	ENSMUSG00000092444	-1.66914	0.0112975	0.106928	1.841	12.6711
Gpt	ENSMUSG00000022546	-1.26639	0.0113295	0.107176	20.8969	55.3789
Bspry	ENSMUSG00000028392	-1.34767	0.0113495	0.107236	3.93985	14.4726
Cdk7	ENSMUSG00000069089	-1.03785	0.0113535	0.107236	12.9021	30.4802
NA	ENSMUSG00000078862	-0.949602	0.0113482	0.107236	27.834	57.6927
Irx1	ENSMUSG00000060969	1.68614	0.0114103	0.107717	23.492	9.86521
Tmem14c	ENSMUSG00000021361	-1.84869	0.0114188	0.107742	0.524552	11.3786
Bcl6	ENSMUSG00000022508	1.1317	0.0114264	0.107757	824.365	371.78
Phf1	ENSMUSG00000024193	1.20587	0.0114485	0.107854	344.058	175.095
Yap1	ENSMUSG00000053110	-0.79442	0.0114462	0.107854	154.733	262.154
Ngdn	ENSMUSG00000022204	1.15545	0.0114647	0.10795	275.034	140.848
LOC102632394	ENSMUSG00000097835	-1.35365	0.0114705	0.10795	14.0958	102.216
Stc1	ENSMUSG00000014813	-2.06678	0.011477	0.107956	0.0839961	1.79652
NA	ENSMUSG00000088284	-1.85227	0.011498	0.108098	6.10333	31.894
Ccbe1	ENSMUSG00000046318	-1.51003	0.0115075	0.108132	5.91023	17.5692
Acn9	ENSMUSG00000042505	-1.25522	0.0115135	0.108132	5.03099	13.7747
Gnao1	ENSMUSG00000031748	1.25707	0.0115502	0.108386	137.604	49.1393
Ppp1r14b	ENSMUSG00000056612	1.54158	0.0115544	0.108386	74.9612	35.2661
Zhx2	ENSMUSG00000071757	1.12997	0.0115583	0.108386	322.445	166.684
Slc25a18	ENSMUSG00000004902	-1.60183	0.0115793	0.108451	1.4966	15.0259
H2afz	ENSMUSG00000037894	1.12282	0.0115831	0.108451	118.884	56.8328
NA	ENSMUSG00000092510	1.99178	0.0115781	0.108451	4.39074	5.12399
Arhgef40	ENSMUSG00000004562	1.17736	0.0116222	0.108484	179.819	87.1231
Myo1e	ENSMUSG00000032220	0.934532	0.0116018	0.108484	136.261	69.6071
Plscr2	ENSMUSG00000032372	-0.908594	0.0115985	0.108484	221.05	466.941
Fxyd1	ENSMUSG00000036570	1.04366	0.0116164	0.108484	7747.89	4292.42
Cryzl1	ENSMUSG00000058240	-1.23674	0.0116152	0.108484	15.412	53.7926
2610301B20Rik	ENSMUSG00000059482	-1.37629	0.0116188	0.108484	4.34274	14.6076
Slc16a4	ENSMUSG00000027896	-0.967372	0.0116746	0.108806	15.2965	32.366
Jakmip3	ENSMUSG00000056856	1.93256	0.011672	0.108806	5.71399	0.760311
NA	ENSMUSG00000081487	-1.39591	0.0116733	0.108806	19.9329	78.8244
Gatsl3	ENSMUSG00000020424	-2.02573	0.0117012	0.108855	0.245304	4.90917
Pik3ap1	ENSMUSG00000025017	-1.97782	0.0116954	0.108855	0.239644	6.51455
1700021K19Rik	ENSMUSG00000035629	1.08877	0.0116885	0.108855	789.94	404.637
Nhlh2	ENSMUSG00000048540	2.0399	0.0117037	0.108855	0.855993	0.192386
Pafah2	ENSMUSG00000037366	1.32686	0.0117337	0.109079	109.225	51.9222
Ndrg4	ENSMUSG00000036564	1.17039	0.0117681	0.109343	698.244	306.165
NA	ENSMUSG00000074592	1.65828	0.0117744	0.109346	#VALUE!	#VALUE!
LOC100862268	ENSMUSG00000097456	-1.63874	0.011785	0.109388	5.86835	51.6918
Ptrhd1	ENSMUSG00000096199	0.904848	0.011811	0.109574	26.0863	12.7813
Sirt2	ENSMUSG00000015149	0.839489	0.0118517	0.109875	378.355	210.159
Smok2a	ENSMUSG00000073458	2.05423	0.0118554	0.109875	1.75785	0.219423
Zfp703	ENSMUSG00000085795	1.15821	0.0118637	0.109895	52.7111	24.0571
Fbxl5	ENSMUSG00000039753	-1.18633	0.0118926	0.110052	10.9144	30.1485
Ugt1a5	ENSMUSG00000089943	-1.99106	0.0118881	0.110052	0.129236	1.31319
Ctnnal1	ENSMUSG00000038816	-0.904671	0.0119088	0.110146	111.163	223.863
Rph3a	ENSMUSG00000029608	1.69492	0.0119208	0.110201	4.11982	1.54214
NA	ENSMUSG00000092571	1.86355	0.0119293	0.110224	33.2649	27.7352
Pex2	ENSMUSG00000040374	-1.15836	0.0119397	0.110264	10.6014	23.7831
Skp1a	ENSMUSG00000036309	-1.33827	0.0119504	0.110307	10.1235	33.2214
Tle3	ENSMUSG00000032280	1.53733	0.0119679	0.110413	25.0183	10.2482
NA	ENSMUSG00000083111	-1.05164	0.0119992	0.110646	7.29503	18.1994
Tcof1	ENSMUSG00000024613	1.25419	0.0120094	0.110684	92.2126	45.1541
B3gnt1	ENSMUSG00000047379	-1.56172	0.0120273	0.110738	3.30694	9.53003
NA	ENSMUSG00000093975	-1.77725	0.0120274	0.110738	2.83452	35.5103
Ulk4	ENSMUSG00000040936	1.30998	0.0120336	0.110739	11.7728	4.97736
A930019D19Rik	ENSMUSG00000085958	-1.58005	0.0120491	0.110826	7.05032	62.0327
NA	ENSMUSG00000097500	1.60238	0.0120558	0.110832	37.5399	10.9744
NA	ENSMUSG00000097143	-1.16213	0.0120745	0.110948	#VALUE!	#VALUE!
NA	ENSMUSG00000065716	-1.96828	0.0120861	0.110998	1.44468	33.8128
NA	ENSMUSG00000054178	-1.45001	0.0120998	0.111069	9.28502	40.9569
Dyrk1a	ENSMUSG00000022897	0.755116	0.0121139	0.111107	268.106	156.93
NA	ENSMUSG00000085658	-1.64802	0.0121161	0.111107	0.72476	5.30887
NA	ENSMUSG00000086472	-1.56905	0.0121279	0.111159	6.91057	42.4964
Lypd6	ENSMUSG00000050447	1.85185	0.0121497	0.111303	4.14222	0.474998
Lrfn4	ENSMUSG00000045045	1.24028	0.0121686	0.11142	87.3105	41.2427
Scn1b	ENSMUSG00000019194	1.39972	0.0121819	0.111487	69.0313	28.2981
NA	ENSMUSG00000081302	1.43407	0.0121969	0.111568	86.2264	30.8923
Abl2	ENSMUSG00000026596	1.08949	0.0122095	0.111571	73.8805	39.5643
Zik1	ENSMUSG00000030393	-1.70517	0.0122042	0.111571	0.401786	3.83381
[truncated: 39,129 more rows]

## Sheet: RM_vs_LV
Gene_symbol	Gene_ENSEMBL	log2FoldChange	pvalue	padj	RM_geo_RPK	LV_geo_RPK
Postn	ENSMUSG00000027750	4.64372	8.10532e-25	1.01406e-20	158.978	3.91536
Adamts20	ENSMUSG00000022449	4.04019	1.65437e-19	1.03489e-15	73.4884	3.33857
Fn1	ENSMUSG00000026193	3.00455	2.06169e-15	8.59795e-12	75.4092	8.64486
Col12a1	ENSMUSG00000032332	3.99322	2.1171e-12	6.62175e-09	14.8731	0.342861
Nppa	ENSMUSG00000041616	2.85823	8.42205e-12	2.10737e-08	182.243	21.5672
Anxa2	ENSMUSG00000032231	3.13077	1.09187e-11	2.27672e-08	84.0595	7.27547
Ppm1e	ENSMUSG00000046442	3.15163	8.99617e-11	1.60787e-07	342.976	35.4973
Sprr1a	ENSMUSG00000050359	4.27825	2.64311e-10	4.13349e-07	61.4654	0.124069
Rtn4	ENSMUSG00000020458	2.2433	5.97716e-10	8.30892e-07	375.434	73.1025
Mfap4	ENSMUSG00000042436	2.84443	2.66383e-09	3.33272e-06	75.7556	7.0023
Slc6a6	ENSMUSG00000030096	1.52639	3.6734e-09	3.55906e-06	433.988	147.702
Ulk3	ENSMUSG00000032308	1.97677	3.15412e-09	3.55906e-06	127.751	28.2331
Piezo2	ENSMUSG00000041482	3.61577	3.69817e-09	3.55906e-06	6.18084	0.297718
Gadd45g	ENSMUSG00000021453	2.62667	4.98987e-09	4.45916e-06	239.362	35.5879
Msn	ENSMUSG00000031207	2.50533	5.82325e-09	4.85698e-06	407.257	63.3699
Serpina3n	ENSMUSG00000021091	3.35339	8.63607e-09	6.75287e-06	36.214	2.25817
Bhlhe40	ENSMUSG00000030103	1.76882	1.56146e-08	1.14914e-05	442.384	122.448
Snap91	ENSMUSG00000033419	2.02202	1.72802e-08	1.20107e-05	50.75	11.7336
Col1a1	ENSMUSG00000001506	2.39259	1.98512e-08	1.30715e-05	157.254	25.6044
Clu	ENSMUSG00000022037	1.91079	2.19478e-08	1.37295e-05	390.667	97.7582
Col3a1	ENSMUSG00000026043	2.11758	3.44557e-08	2.05274e-05	96.5813	19.449
Trim47	ENSMUSG00000020773	2.77921	4.33819e-08	2.34279e-05	110.485	14.4084
Slc25a34	ENSMUSG00000040740	-1.79037	4.2807e-08	2.34279e-05	129.653	474.959
Serpinb1a	ENSMUSG00000044734	2.80441	4.49421e-08	2.34279e-05	39.667	4.324
Fhl1	ENSMUSG00000023092	1.84419	5.94202e-08	2.97363e-05	732.104	193.182
1700030F18Rik	ENSMUSG00000045350	-1.97771	1.08141e-07	5.20367e-05	25.0384	114.304
Slc22a4	ENSMUSG00000020334	2.02332	2.27846e-07	9.86792e-05	209.611	46.45
Dpysl3	ENSMUSG00000024501	2.16687	2.20165e-07	9.86792e-05	38.942	8.02019
Lrp8	ENSMUSG00000028613	3.18241	2.28734e-07	9.86792e-05	67.056	6.55137
Pfkp	ENSMUSG00000021196	1.55952	5.4873e-07	0.000221457	769.124	251.756
Col1a2	ENSMUSG00000029661	2.08857	5.43425e-07	0.000221457	84.103	16.8288
NA	ENSMUSG00000097900	-1.4882	6.00998e-07	0.000234971	385.689	1135.43
1110034G24Rik	ENSMUSG00000044991	-2.2391	8.419e-07	0.000310851	344.502	2043.21
ND5	ENSMUSG00000064367	-1.75708	8.4477e-07	0.000310851	166.617	564.7
Uchl1	ENSMUSG00000029223	3.47071	9.28481e-07	0.000331892	45.4533	0.557217
Plk2	ENSMUSG00000021701	2.14401	1.05141e-06	0.000346163	162.38	32.6652
Ptn	ENSMUSG00000029838	2.84351	1.03665e-06	0.000346163	16.16	1.14784
Clca1	ENSMUSG00000056025	3.08815	1.01594e-06	0.000346163	25.1383	2.2166
Pik3r3	ENSMUSG00000028698	2.06956	1.47105e-06	0.000471905	18.6099	3.78004
Wisp2	ENSMUSG00000027656	2.97992	1.93655e-06	0.00059093	22.736	1.52685
Anapc15	ENSMUSG00000030649	1.99395	1.88935e-06	0.00059093	28.1883	5.88384
Fam198b	ENSMUSG00000027955	1.9719	2.26639e-06	0.000666244	100.407	22.7815
Pdgfc	ENSMUSG00000028019	2.15476	2.28987e-06	0.000666244	15.0604	3.07212
Runx1	ENSMUSG00000022952	2.22841	2.35171e-06	0.000668689	28.5069	5.41085
NA	ENSMUSG00000080976	3.0765	2.82094e-06	0.000784284	584.544	34.4487
NA	ENSMUSG00000085779	-1.76211	2.88539e-06	0.000784763	213.164	845.131
Slitrk4	ENSMUSG00000046699	2.61362	3.10667e-06	0.00082697	10.4344	1.20158
Phldb2	ENSMUSG00000033149	2.13192	3.81635e-06	0.000994715	304.401	61.9455
Rasl11b	ENSMUSG00000049907	1.97223	4.34819e-06	0.00111021	353.91	83.1537
Tgfb2	ENSMUSG00000039239	1.68217	4.84806e-06	0.00121308	204.877	62.4255
Serpina3i	ENSMUSG00000079014	2.41176	5.81945e-06	0.00142759	22.4798	3.28097
NA	ENSMUSG00000074813	2.59731	6.42985e-06	0.001547	61.5689	6.31404
Lman1l	ENSMUSG00000056271	2.39006	6.82652e-06	0.00161144	55.1045	6.68928
Map1b	ENSMUSG00000052727	2.27664	7.20679e-06	0.00166971	63.078	10.9271
Plcg2	ENSMUSG00000034330	1.90873	8.8975e-06	0.00202394	47.488	11.6055
Ctgf	ENSMUSG00000019997	1.95779	1.18504e-05	0.0026475	848.044	220.406
NA	ENSMUSG00000100009	-2.10807	1.46444e-05	0.00321432	4.94498	25.2578
Col11a1	ENSMUSG00000027966	3.00742	1.57951e-05	0.00340711	2.42307	0.0603322
Azin2	ENSMUSG00000028789	2.38188	2.10367e-05	0.00446085	57.0364	8.51969
Ccdc68	ENSMUSG00000038903	2.71146	2.27778e-05	0.00474954	34.5294	1.34662
Sorbs3	ENSMUSG00000022091	2.04751	2.33794e-05	0.00479507	311.932	66.4251
Col4a5	ENSMUSG00000031274	1.3354	2.7548e-05	0.00555891	228.713	88.6039
Cd44	ENSMUSG00000005087	2.33504	2.89266e-05	0.00574445	42.3108	6.99235
Kif6	ENSMUSG00000023999	-1.74346	2.9708e-05	0.00580745	17.8194	66.8719
NA	ENSMUSG00000082185	2.11545	3.0676e-05	0.00590443	52.6295	10.4856
Ryr3	ENSMUSG00000057378	2.64706	3.13292e-05	0.00593878	17.4999	2.12359
Inpp5f	ENSMUSG00000042105	1.69879	3.31763e-05	0.00619505	88.3325	23.6583
4833412C05Rik	ENSMUSG00000097697	2.58514	3.44649e-05	0.00634103	16.06	0.762985
NA	ENSMUSG00000040705	-1.83392	3.5286e-05	0.00639802	16.3671	65.4194
Sorbs2	ENSMUSG00000031626	0.951635	3.69202e-05	0.0065987	7687.67	3942.76
Osmr	ENSMUSG00000022146	1.76051	3.90509e-05	0.00688121	174.528	48.8778
Lrrc52	ENSMUSG00000040485	-2.22033	4.08875e-05	0.00700744	22.4811	126.309
Ahnak2	ENSMUSG00000072812	2.29543	4.05412e-05	0.00700744	63.1323	10.9761
Grhl1	ENSMUSG00000020656	2.36079	4.19254e-05	0.00708823	40.9958	7.77382
Iqgap1	ENSMUSG00000030536	1.42928	4.52574e-05	0.00754955	391.847	142.508
Dusp6	ENSMUSG00000019960	2.21236	5.43757e-05	0.00895124	19.9878	2.96463
Stx3	ENSMUSG00000041488	1.33099	6.08081e-05	0.00988014	134.505	51.3168
Tmem82	ENSMUSG00000043085	-1.99101	6.29273e-05	0.0100934	50.8128	242.687
Fstl1	ENSMUSG00000022816	1.47287	6.7123e-05	0.0105626	52.8333	17.2065
Bgn	ENSMUSG00000031375	1.65125	6.75414e-05	0.0105626	164.9	46.7726
Dgkh	ENSMUSG00000034731	1.86632	7.4179e-05	0.0114574	16.9712	4.15121
Vmp1	ENSMUSG00000018171	1.18117	8.16993e-05	0.0124651	118.221	49.5957
ND6	ENSMUSG00000064368	-1.74556	8.45084e-05	0.0126521	119.649	438.077
C920021L13Rik	ENSMUSG00000080727	-1.53341	8.49474e-05	0.0126521	39.1336	123.499
Tmem52	ENSMUSG00000023153	-3.22197	8.82433e-05	0.0129884	2.47161	120.476
Clca2	ENSMUSG00000028262	2.58291	0.000105619	0.0153651	6.41956	0.693506
Rgs11	ENSMUSG00000024186	2.03783	0.000109698	0.0154206	59.5997	14.4242
Gbp6	ENSMUSG00000079362	-0.960414	0.000109319	0.0154206	889.653	1774.51
NA	ENSMUSG00000101953	-1.73154	0.000107537	0.0154206	21.3326	86.101
Abcg2	ENSMUSG00000029802	2.12799	0.000111096	0.0154436	88.9947	16.8556
Ccdc136	ENSMUSG00000029769	2.03527	0.000119307	0.0163512	37.7581	7.21571
Ncam1	ENSMUSG00000039542	2.3727	0.000120239	0.0163512	19.7987	1.35599
Ankrd10	ENSMUSG00000031508	1.34836	0.000122302	0.0164529	330.81	122.58
Meox1	ENSMUSG00000001493	2.38139	0.000126473	0.016833	26.0009	2.57138
2010111I01Rik	ENSMUSG00000021458	1.0393	0.000150794	0.0198588	811.68	390.337
Col14a1	ENSMUSG00000022371	1.6621	0.000152913	0.0199281	17.3896	5.13496
Nt5e	ENSMUSG00000032420	1.25549	0.00016156	0.020838	218.302	90.2933
Capn2	ENSMUSG00000026509	1.39711	0.000170019	0.021486	137.803	51.2624
NA	ENSMUSG00000096449	-1.72672	0.000168502	0.021486	42.2882	152.433
Tlr2	ENSMUSG00000027995	2.76589	0.000179032	0.0223986	8.35298	0.185803
Ogg1	ENSMUSG00000030271	1.96623	0.00018924	0.0234414	28.3641	5.73225
Tgfb1i1	ENSMUSG00000030782	1.95555	0.000191972	0.0235467	66.8225	16.5251
NA	ENSMUSG00000082179	-1.74039	0.000194017	0.0235665	16.2014	58.6923
Ell2	ENSMUSG00000001542	1.1051	0.000210511	0.0248462	164.344	74.7135
Sec1	ENSMUSG00000040364	2.44685	0.00021051	0.0248462	6.51933	0.285656
Tnfaip8	ENSMUSG00000062210	-1.85261	0.000207407	0.0248462	45.7691	206.051
Trp53	ENSMUSG00000059552	1.20268	0.000227408	0.0263436	159.4	67.4771
NA	ENSMUSG00000080888	-1.62008	0.000225419	0.0263436	13.1786	44.9636
Thbs4	ENSMUSG00000021702	2.06928	0.000243458	0.027944	40.5341	6.16083
Mbnl2	ENSMUSG00000022139	0.873479	0.000253042	0.0287801	633.735	343.462
Ndst2	ENSMUSG00000039308	1.18069	0.000256968	0.0289634	79.5282	33.9701
Boc	ENSMUSG00000022687	2.53197	0.000264594	0.0294296	6.23441	0.99448
NA	ENSMUSG00000097583	-1.08377	0.00026581	0.0294296	38.0994	83.254
Tpcn2	ENSMUSG00000048677	1.50141	0.000271484	0.0297941	22.8742	7.56736
Serpinb1c	ENSMUSG00000079049	1.98691	0.000280288	0.0302301	59.7365	13.9796
NA	ENSMUSG00000083000	-1.737	0.000279737	0.0302301	124.786	452.452
Fndc1	ENSMUSG00000071984	1.86204	0.000291005	0.0311177	36.3637	9.09865
NA	ENSMUSG00000083111	-1.59788	0.00030881	0.0327417	18.1994	61.3456
Fam20c	ENSMUSG00000025854	1.69513	0.000314217	0.033035	73.9413	21.3095
Elovl1	ENSMUSG00000006390	1.98507	0.000327585	0.0340089	26.4688	5.12034
Ankrd2	ENSMUSG00000025172	2.77434	0.000330176	0.0340089	23.3355	0.243548
NA	ENSMUSG00000094326	-1.89673	0.000331635	0.0340089	26.5006	150.115
Pcgf6	ENSMUSG00000025050	1.77673	0.000341955	0.0347821	27.3236	7.64265
Zfp697	ENSMUSG00000050064	2.09372	0.000347236	0.0350344	40.8744	6.22312
Pik3r5	ENSMUSG00000020901	2.31734	0.000360382	0.0357837	7.04998	0.804131
Mfap5	ENSMUSG00000030116	1.84811	0.000358573	0.0357837	22.5092	5.45278
Eno2	ENSMUSG00000004267	1.90013	0.000366444	0.0360991	49.3933	9.83263
Slc9a7	ENSMUSG00000037341	2.0537	0.000402023	0.0392946	14.3012	2.15714
Col5a2	ENSMUSG00000026042	2.25337	0.000410154	0.039497	16.3133	2.23688
P4ha3	ENSMUSG00000051048	2.39303	0.000410408	0.039497	14.6758	2.10909
Camk2g	ENSMUSG00000021820	1.0823	0.000416603	0.0397872	191.045	89.2154
Egflam	ENSMUSG00000042961	-2.13468	0.000423152	0.0401064	3.2706	20.1286
Notch3	ENSMUSG00000038146	-1.32771	0.000429009	0.0403559	51.6078	138.16
Frem2	ENSMUSG00000037016	1.77055	0.000461553	0.0430932	110.639	29.8167
NA	ENSMUSG00000021557	-1.02643	0.000516503	0.0468815	373.336	785.767
Pak3	ENSMUSG00000031284	2.19927	0.000520864	0.0468815	3.14191	0.630644
Uba7	ENSMUSG00000032596	1.50955	0.000517085	0.0468815	45.7016	16.003
Zfp444	ENSMUSG00000044876	-1.17847	0.00051035	0.0468815	9.43233	22.2743
NA	ENSMUSG00000099871	1.5624	0.000518343	0.0468815	321.852	105.217
Adam9	ENSMUSG00000031555	1.34642	0.000525861	0.0469932	72.0889	26.7735
Fbln2	ENSMUSG00000064080	1.67963	0.000535872	0.0475415	82.2232	23.379
NA	ENSMUSG00000101249	-1.51905	0.000539596	0.0475415	1058.06	3465.17
Satb1	ENSMUSG00000023927	1.10472	0.00055069	0.0481796	129.198	60.1027
Pde8a	ENSMUSG00000025584	1.44877	0.000558011	0.0484811	51.8098	17.7539
Kcnj14	ENSMUSG00000058743	2.37549	0.000570398	0.0489732	8.49272	0.721319
NA	ENSMUSG00000085826	2.6625	0.000571504	0.0489732	2.92072	0.190157
Gjc1	ENSMUSG00000034520	1.33328	0.000575598	0.0489884	88.0991	33.0365
Spns2	ENSMUSG00000040447	2.30668	0.000588417	0.0497411	12.3112	1.62637
Rai14	ENSMUSG00000022246	1.4689	0.000632816	0.0530588	11.9428	3.85034
Celsr3	ENSMUSG00000023473	-1.42446	0.000636146	0.0530588	19.6841	57.8856
Cpeb1	ENSMUSG00000025586	1.20358	0.000641126	0.05312	440.009	185.786
Fbn1	ENSMUSG00000027204	1.37024	0.000707826	0.0578798	28.244	9.44203
Mtmr12	ENSMUSG00000039458	1.20046	0.000707362	0.0578798	57.4161	23.8803
Igsf3	ENSMUSG00000042035	1.33314	0.000721473	0.0586126	47.5454	18.3719
Plcxd2	ENSMUSG00000087141	2.4549	0.000740525	0.0597723	3.35513	0.119084
Col24a1	ENSMUSG00000028197	2.28225	0.000758763	0.0604642	2.92705	0.231475
NA	ENSMUSG00000063524	0.996309	0.000755964	0.0604642	605.275	294.813
Zfp7	ENSMUSG00000033669	-1.54869	0.000768844	0.0608798	11.6761	36.0906
Anxa4	ENSMUSG00000029994	1.42599	0.000792861	0.0623867	474.098	168.883
Tspan17	ENSMUSG00000025875	1.7789	0.000807311	0.0631267	34.3932	8.51259
4930481A15Rik	ENSMUSG00000086938	-1.50909	0.000823363	0.063587	61.5793	214.846
BC039771	ENSMUSG00000087594	2.05225	0.000821895	0.063587	16.239	2.75002
Wsb1	ENSMUSG00000017677	1.6302	0.000839416	0.0640361	68.7776	21.4328
Lyst	ENSMUSG00000019726	1.14948	0.000838643	0.0640361	120.931	53.3062
9430020K01Rik	ENSMUSG00000033960	1.56133	0.000885095	0.0671117	44.6226	14.3609
Loxl4	ENSMUSG00000025185	1.35327	0.000892669	0.0672782	14.7099	5.12432
Fosl2	ENSMUSG00000029135	1.32753	0.000898528	0.0673143	120.48	43.7206
Myof	ENSMUSG00000048612	1.38828	0.000947569	0.0705657	11.9886	4.19341
Pkd2l2	ENSMUSG00000014503	-1.26422	0.000976026	0.0713899	60.2945	153.56
Hbegf	ENSMUSG00000024486	1.55948	0.000981278	0.0713899	152.447	46.0715
Reck	ENSMUSG00000028476	1.9939	0.000969184	0.0713899	4.2031	0.701853
Cspg4	ENSMUSG00000032911	1.95439	0.000984859	0.0713899	131.36	28.394
ND1	ENSMUSG00000064341	-1.4117	0.000987168	0.0713899	296.275	848.946
Plod2	ENSMUSG00000032374	1.55961	0.0010404	0.0743794	286.044	86.7833
NA	ENSMUSG00000047988	1.65623	0.0010391	0.0743794	54.6939	13.7715
Ndrg1	ENSMUSG00000005125	1.72486	0.00107456	0.0754074	38.7331	10.5279
Igf1r	ENSMUSG00000005533	1.19761	0.00106742	0.0754074	126.426	55.5546
Masp1	ENSMUSG00000022887	1.48053	0.00107889	0.0754074	79.1911	27.9705
Blm	ENSMUSG00000030528	1.65494	0.00107804	0.0754074	11.0418	2.87738
Rpl3l	ENSMUSG00000002500	-1.08339	0.0011427	0.0794238	403.044	886.702
Tnc	ENSMUSG00000028364	2.30326	0.00117582	0.0812746	10.4674	1.08288
Gm15446	ENSMUSG00000090015	-1.74456	0.00121472	0.0835022	19.725	81.2123
Sptbn4	ENSMUSG00000011751	-1.80463	0.00124657	0.0851756	3.52553	15.0487
NA	ENSMUSG00000034205	1.4985	0.00125268	0.0851756	10.4999	3.52684
Lrrc4b	ENSMUSG00000047085	-1.40279	0.00127578	0.0862773	97.3824	283.17
Ltbp2	ENSMUSG00000002020	1.90287	0.00131011	0.0875424	28.4158	7.14994
Etv5	ENSMUSG00000013089	1.38114	0.00131548	0.0875424	44.5778	15.4423
Acss2	ENSMUSG00000027605	1.00609	0.00131076	0.0875424	186.184	92.0155
Prss46	ENSMUSG00000049719	2.59852	0.00132745	0.0878718	3.15686	0.0795545
Fgd6	ENSMUSG00000020021	0.949556	0.0013413	0.0883211	126.766	63.054
Leprel1	ENSMUSG00000038168	2.09079	0.00135585	0.0888119	9.58871	1.19025
Tpm2	ENSMUSG00000028464	1.65158	0.00144011	0.0938396	421.849	142.002
Adpgk	ENSMUSG00000025236	1.56589	0.00147122	0.0948784	102.191	27.7383
Flna	ENSMUSG00000031328	1.55418	0.0014654	0.0948784	87.4862	28.8864
Ypel1	ENSMUSG00000022773	-1.25066	0.00149124	0.0956765	12.6619	31.4987
Vwa1	ENSMUSG00000042116	-1.1687	0.00155699	0.0991244	23.616	58.207
Garem	ENSMUSG00000042680	0.955722	0.00156083	0.0991244	194.403	97.7626
S1pr1	ENSMUSG00000045092	1.28642	0.00159267	0.100636	32.552	12.2837
Atp13a3	ENSMUSG00000022533	1.37069	0.00160395	0.100839	60.3794	21.2218
Spry4	ENSMUSG00000024427	1.64365	0.00163129	0.102045	13.2404	3.88023
Loxl3	ENSMUSG00000000693	1.95134	0.00164132	0.102162	12.3597	2.23947
Ywhah	ENSMUSG00000018965	1.1801	0.00166828	0.102848	59.6029	23.8681
Erbb2	ENSMUSG00000062312	1.40711	0.00166878	0.102848	46.8128	16.6571
Stk38l	ENSMUSG00000001630	1.20101	0.00169411	0.10339	87.4968	36.2341
Ildr2	ENSMUSG00000040612	1.90935	0.00168661	0.10339	6.70048	0.564885
Nmt2	ENSMUSG00000026643	1.04057	0.0017355	0.105402	78.3067	37.398
Camkk2	ENSMUSG00000029471	1.40136	0.00175744	0.106219	20.461	7.73501
Tmem179	ENSMUSG00000054013	-1.41237	0.00177023	0.106478	58.7698	172.702
Txnrd1	ENSMUSG00000020250	1.03597	0.00179949	0.10772	116.13	56.0606
Gm16576	ENSMUSG00000087543	-1.29626	0.00181614	0.108199	36.3695	97.3859
Ampd2	ENSMUSG00000027889	1.61808	0.00186503	0.110585	11.3967	3.20082
Spire1	ENSMUSG00000024533	1.89088	0.0018845	0.111208	10.5319	1.7775
Cpne2	ENSMUSG00000034361	1.72077	0.00189332	0.111208	11.9448	2.93703
COX1	ENSMUSG00000064351	-1.38172	0.00190817	0.111556	577.709	1641.35
Pfkfb3	ENSMUSG00000026773	1.62643	0.00199773	0.115178	21.148	4.25169
Klhl40	ENSMUSG00000074001	1.65856	0.00198458	0.115178	53.4491	16.6301
NA	ENSMUSG00000099618	2.04766	0.00199418	0.115178	141.679	35.5225
Chrna10	ENSMUSG00000066279	-1.34489	0.00206316	0.118405	82.7702	232.023
Tap1	ENSMUSG00000037321	1.52381	0.00208825	0.119297	16.3501	4.89807
Slc9a2	ENSMUSG00000026062	-1.43317	0.00209905	0.119369	6.37099	18.6848
Serpine1	ENSMUSG00000037411	1.63669	0.00219525	0.123715	265.137	78.2541
Naca	ENSMUSG00000061315	-0.943133	0.00219214	0.123715	2202.17	4523.25
Igf2	ENSMUSG00000048583	-2.17195	0.00222687	0.124935	1.47592	12.8255
Hhipl1	ENSMUSG00000021260	2.14062	0.00225142	0.125748	13.3294	1.94554
Traf3	ENSMUSG00000021277	1.04831	0.00228022	0.126791	29.4936	13.6818
Glud1	ENSMUSG00000021794	0.960189	0.00230404	0.127079	99.7144	50.457
Thbs2	ENSMUSG00000023885	1.7377	0.00230572	0.127079	10.8158	2.71704
Urb2	ENSMUSG00000031976	1.07742	0.00235242	0.129084	35.8699	16.6666
Npr3	ENSMUSG00000022206	1.43121	0.00238678	0.130397	21.8979	6.83702
Pappa	ENSMUSG00000028370	1.67835	0.00245173	0.132348	3.94711	0.942564
Fbxl2	ENSMUSG00000032507	1.68694	0.00245422	0.132348	17.4014	3.63262
Dhrs3	ENSMUSG00000066026	-1.22385	0.00243561	0.132348	120.916	305.849
Uck2	ENSMUSG00000026558	1.68698	0.00248388	0.133372	92.7007	25.0546
CYTB	ENSMUSG00000064370	-1.3391	0.00253682	0.135578	277.011	755.246
NA	ENSMUSG00000078866	-1.27311	0.00254662	0.135578	55.6272	145.159
Malt1	ENSMUSG00000032688	1.04506	0.0026041	0.13805	479.08	224.45
Gdi1	ENSMUSG00000015291	0.784282	0.00269503	0.142268	438.66	249.8
Slc7a6	ENSMUSG00000031904	1.06726	0.00271828	0.142893	104.308	47.9251
Slc12a4	ENSMUSG00000017765	1.00003	0.00277355	0.145188	268.53	132.071
Fam46a	ENSMUSG00000032265	0.923541	0.00278804	0.145338	113.083	58.0892
Rnf207	ENSMUSG00000058498	-1.18746	0.00280868	0.145806	1257.09	3005.82
Tmem176b	ENSMUSG00000029810	1.88097	0.00288364	0.149079	29.6374	4.93211
Galnt7	ENSMUSG00000031608	1.29352	0.00292	0.149318	20.0302	7.804
Nup93	ENSMUSG00000032939	1.31279	0.00290221	0.149318	85.1986	30.7626
NA	ENSMUSG00000094526	1.66748	0.00292406	0.149318	13.9816	3.12303
Fam19a3	ENSMUSG00000055865	-1.1541	0.00296253	0.150667	67.2616	157.216
NA	ENSMUSG00000082724	-1.45539	0.00312973	0.158526	10.1436	33.0578
Cyp20a1	ENSMUSG00000049439	1.11233	0.0032122	0.162048	33.4037	14.0912
ND4	ENSMUSG00000064363	-1.49684	0.00323406	0.162495	267.665	808.897
Ppargc1a	ENSMUSG00000029167	-1.25247	0.0032713	0.16337	1308.67	3620.56
NA	ENSMUSG00000081043	-1.52018	0.00327759	0.16337	19.7157	71.9591
Ppp1r3fos	ENSMUSG00000039545	-1.29144	0.00330215	0.163941	8.15014	22.1524
Anxa7	ENSMUSG00000021814	1.11426	0.00332326	0.164337	78.5577	35.6535
Fat1	ENSMUSG00000070047	1.34181	0.00337879	0.165862	184.754	68.4542
NA	ENSMUSG00000073590	-1.18379	0.00338062	0.165862	13.7799	35.1357
Ptpn18	ENSMUSG00000026126	-1.03943	0.00343472	0.167858	13.9664	29.9976
Stxbp2	ENSMUSG00000004626	1.53411	0.00347906	0.168707	41.0756	12.6236
Rbfox1	ENSMUSG00000008658	-1.32265	0.00346846	0.168707	81.2058	263.13
Maged1	ENSMUSG00000025151	0.859023	0.00350141	0.169136	294.296	158.58
Spata13	ENSMUSG00000021990	1.49196	0.00356541	0.171307	32.4883	9.4254
Myo7a	ENSMUSG00000030761	1.96486	0.00357375	0.171307	7.9263	1.41418
Fanci	ENSMUSG00000039187	-1.23353	0.00364415	0.174015	8.07123	20.0618
ND2	ENSMUSG00000064345	-1.55247	0.00369814	0.175922	85.7403	279.954
Atxn10	ENSMUSG00000016541	1.12125	0.00373743	0.177118	140.714	62.5616
Fabp3	ENSMUSG00000028773	-1.14045	0.00377337	0.178069	583.988	1393.72
Vamp5	ENSMUSG00000073002	-1.41697	0.00378598	0.178069	88.8979	267.202
Srd5a3	ENSMUSG00000029233	1.86055	0.00383324	0.179617	19.3548	2.93505
Pip4k2a	ENSMUSG00000026737	1.60237	0.00388911	0.181555	19.9685	5.11978
Myo5a	ENSMUSG00000034593	1.15408	0.0040013	0.186098	76.5871	33.9305
Phka2	ENSMUSG00000031295	0.77408	0.00413049	0.191395	177.418	101.943
Lpl	ENSMUSG00000015568	-1.07204	0.00417415	0.191995	870.97	1985.55
Zswim6	ENSMUSG00000032846	1.0709	0.00416871	0.191995	29.4781	14.3014
Fgf18	ENSMUSG00000057967	1.94166	0.00420456	0.192686	52.0107	10.7498
NA	ENSMUSG00000086806	1.87409	0.00423223	0.193246	85.2321	14.237
Tnfrsf23	ENSMUSG00000037613	1.39018	0.00430876	0.195654	17.6855	5.722
Zfp931	ENSMUSG00000078861	-1.60436	0.00431624	0.195654	36.0157	162.257
Appl2	ENSMUSG00000020263	-0.813017	0.00435555	0.196397	552.98	992.702
Myh10	ENSMUSG00000020900	1.58302	0.00437452	0.196397	167.623	49.7235
Mettl7a3	ENSMUSG00000058057	-1.44105	0.00437972	0.196397	20.1758	62.1454
Rusc2	ENSMUSG00000035969	1.35283	0.00448617	0.199738	232.151	84.48
NA	ENSMUSG00000099137	-1.28822	0.00447446	0.199738	18.5832	48.1662
Top2a	ENSMUSG00000020914	1.33067	0.00453556	0.201221	8.16305	2.97855
Kirrel3	ENSMUSG00000032036	-1.88828	0.00457481	0.202245	2.84097	15.5452
Ninl	ENSMUSG00000068115	1.47382	0.00460888	0.203034	10.8237	3.76131
Dip2a	ENSMUSG00000020231	1.31845	0.00463942	0.203662	40.843	16.286
Slc38a2	ENSMUSG00000022462	0.745343	0.00467094	0.204329	1294.01	763.284
NA	ENSMUSG00000084858	-1.40906	0.00475481	0.207273	9.32899	30.5364
Gpc4	ENSMUSG00000031119	1.31285	0.00485263	0.20863	41.1785	13.7495
Prkab2	ENSMUSG00000038205	0.955885	0.00481835	0.20863	193.165	96.4117
Samd10	ENSMUSG00000038605	-1.52943	0.00483878	0.20863	5.79395	18.1388
Wdr47	ENSMUSG00000040389	1.46139	0.00485242	0.20863	28.9794	10.1247
ND4L	ENSMUSG00000065947	-1.5997	0.00495332	0.212229	120.51	438.258
Slit2	ENSMUSG00000031558	1.19688	0.00503041	0.214053	7.90796	3.4299
Csk	ENSMUSG00000032312	1.22017	0.00502784	0.214053	45.1668	19.6841
Usp4	ENSMUSG00000032612	0.703025	0.00509319	0.214053	154.485	93.7275
Col16a1	ENSMUSG00000040690	1.75386	0.00505765	0.214053	7.30571	1.66006
Vamp8	ENSMUSG00000050732	-1.24263	0.00509777	0.214053	26.1073	68.7474
NA	ENSMUSG00000090105	-1.2422	0.00509853	0.214053	66.1896	180.478
Grip1	ENSMUSG00000034813	1.49389	0.00517366	0.215759	14.1346	4.27382
Rras	ENSMUSG00000038387	0.916064	0.0051571	0.215759	112.264	58.4021
Slc35f5	ENSMUSG00000026342	0.983037	0.00520313	0.216267	343.219	168.492
NA	ENSMUSG00000067736	-1.58197	0.00528296	0.218858	127.018	452.927
Fam120a	ENSMUSG00000038014	0.661586	0.00540364	0.223118	252.769	158.75
Map6	ENSMUSG00000055407	1.75436	0.00543458	0.223658	9.03417	0.442134
Gclc	ENSMUSG00000032350	1.06585	0.00546093	0.224006	74.9894	35.4655
Slc37a1	ENSMUSG00000024036	1.43418	0.00555663	0.227186	32.9622	12.481
Pcgf5	ENSMUSG00000024805	1.22572	0.00558755	0.227249	212.244	87.2854
Col15a1	ENSMUSG00000028339	1.27857	0.0055945	0.227249	37.0689	14.166
Specc1	ENSMUSG00000042331	1.81777	0.00563623	0.227869	6.16173	0.892513
NA	ENSMUSG00000072763	-1.79303	0.00564618	0.227869	3.90943	17.9546
Igsf9b	ENSMUSG00000034275	1.45237	0.00567279	0.228207	74.1844	23.1051
Myl9	ENSMUSG00000067818	1.70571	0.00574512	0.230376	25.4015	5.09517
Skap2	ENSMUSG00000059182	1.32759	0.00579166	0.2315	7.70706	2.54653
Smad7	ENSMUSG00000025880	1.34166	0.00584484	0.232881	130.424	47.6373
Col18a1	ENSMUSG00000001435	1.5929	0.00598105	0.235415	4.70994	1.19782
Mef2c	ENSMUSG00000005583	0.926525	0.00595273	0.235415	94.3254	49.3303
Picalm	ENSMUSG00000039361	0.763796	0.00594371	0.235415	225.111	129.367
Bend4	ENSMUSG00000092060	1.91122	0.0059837	0.235415	8.6108	1.17174
NA	ENSMUSG00000073779	1.98603	0.00600328	0.235445	2.97476	1.22982
Cblb	ENSMUSG00000022637	1.34846	0.00604736	0.236433	197.405	68.8643
Ybx2	ENSMUSG00000018554	-1.05427	0.00608942	0.237336	222.75	473.873
Optn	ENSMUSG00000026672	-1.0007	0.00611179	0.237468	545.562	1166.03
Usp47	ENSMUSG00000059263	0.963986	0.006214	0.240691	271.201	140.523
Gbp8	ENSMUSG00000034438	-1.0096	0.00632689	0.244308	58.6678	122.959
B4galt5	ENSMUSG00000017929	1.15924	0.00643719	0.244716	54.3845	22.6836
Shmt1	ENSMUSG00000020534	-1.35826	0.00638493	0.244716	15.3672	44.3902
Slc10a7	ENSMUSG00000031684	1.30552	0.00638494	0.244716	20.9016	8.28089
Yjefn3	ENSMUSG00000048967	-1.88595	0.00645482	0.244716	23.2481	149.348
Adamtsl3	ENSMUSG00000070469	1.50281	0.00641815	0.244716	5.95535	1.64394
NA	ENSMUSG00000090012	-1.56928	0.00642971	0.244716	20.4304	71.7258
Shisa3	ENSMUSG00000050010	1.31891	0.00647815	0.244858	23.9319	8.27049
Zbtb20	ENSMUSG00000022708	-0.676442	0.00653651	0.245581	792.199	1291.03
NA	ENSMUSG00000087623	1.86148	0.00652372	0.245581	13.6171	1.52563
Gatc	ENSMUSG00000029536	-0.863968	0.00659168	0.246912	83.3181	152.355
Cntnap1	ENSMUSG00000017167	-1.06931	0.00664615	0.247433	16.9816	38.0606
Epb4.1l1	ENSMUSG00000027624	1.55584	0.00666494	0.247433	8.13602	2.63307
Edem2	ENSMUSG00000038312	0.803631	0.00663108	0.247433	90.6002	50.843
Gm15816	ENSMUSG00000086741	-0.915523	0.00671504	0.248556	443.254	875.153
Socs3	ENSMUSG00000053113	1.98501	0.00675579	0.249326	25.3624	4.34875
Heatr5a	ENSMUSG00000035181	1.01299	0.00691848	0.25458	86.8856	41.2873
Jag2	ENSMUSG00000002799	1.32325	0.00695715	0.255252	38.8754	14.6067
NA	ENSMUSG00000056366	-1.08601	0.00699302	0.255818	479.829	1120.33
Anxa3	ENSMUSG00000029484	1.75691	0.00705876	0.256722	33.522	5.10741
NA	ENSMUSG00000083011	1.24082	0.00704962	0.256722	168.522	69.292
Tfdp2	ENSMUSG00000032411	-1.31042	0.00720432	0.258261	102.784	309.297
Sh3tc1	ENSMUSG00000036553	1.64083	0.00718767	0.258261	11.562	2.94677
Orai3	ENSMUSG00000043964	1.32231	0.00714569	0.258261	79.8851	25.0028
Ldlrad3	ENSMUSG00000048058	1.35149	0.00715666	0.258261	20.1301	5.00288
Lrch1	ENSMUSG00000068015	1.14063	0.00718854	0.258261	168.012	74.2292
NA	ENSMUSG00000084998	-1.2337	0.00723812	0.258732	11.0196	27.9805
Abcc9	ENSMUSG00000030249	-1.06067	0.00730583	0.258933	412.817	978.791
Pdlim3	ENSMUSG00000031636	1.04246	0.00726987	0.258933	266.789	129.029
Ucp3	ENSMUSG00000032942	-1.5302	0.00728579	0.258933	54.7265	243.427
Cnksr1	ENSMUSG00000028841	1.09862	0.00737154	0.260523	408.29	186.67
Aldh1l2	ENSMUSG00000020256	-1.52017	0.00744265	0.261559	4.42847	18.5193
NA	ENSMUSG00000078894	-1.28963	0.00742603	0.261559	10.1153	27.3935
Pde4c	ENSMUSG00000031842	-1.37889	0.00754564	0.262232	12.9523	39.2454
Fbxw17	ENSMUSG00000037816	1.4718	0.00753384	0.262232	44.7148	13.7855
Fsd2	ENSMUSG00000038663	-0.738434	0.00752132	0.262232	649.706	1105.5
NA	ENSMUSG00000100862	-1.25547	0.00753552	0.262232	202.237	517.526
NA	ENSMUSG00000084722	-1.25446	0.00760877	0.263694	65.9012	177.979
Nfatc2	ENSMUSG00000027544	1.20352	0.007718	0.26674	294.398	128.885
Arsa	ENSMUSG00000022620	1.6862	0.00776644	0.266939	15.7954	3.76808
Hspe1	ENSMUSG00000073676	-1.66852	0.0077577	0.266939	21.8005	93.0317
Usp28	ENSMUSG00000032267	0.940289	0.00779046	0.267031	669.752	341.86
NA	ENSMUSG00000087034	1.26676	0.00781558	0.26716	120.532	45.7512
Plin5	ENSMUSG00000011305	-0.935831	0.00785415	0.267747	104.598	211.776
Fez2	ENSMUSG00000056121	0.811961	0.00788471	0.268059	117.394	66.8323
5430419D17Rik	ENSMUSG00000006204	1.42084	0.00790881	0.268149	24.6855	7.55419
Anxa5	ENSMUSG00000027712	0.94439	0.00795563	0.26889	486.464	249.463
Lrif1	ENSMUSG00000056260	-1.11895	0.00797363	0.26889	17.028	39.2413
Hcn1	ENSMUSG00000021730	1.74761	0.00805494	0.270901	1.60099	0.632639
Mdga1	ENSMUSG00000043557	-1.11807	0.0081158	0.272216	13.2735	30.4815
Zdhhc18	ENSMUSG00000037553	1.30966	0.0081898	0.273964	33.6361	11.8804
NA	ENSMUSG00000060036	1.06973	0.00824054	0.274926	350.793	161.848
Tmem38b	ENSMUSG00000028420	1.32217	0.0083907	0.279192	32.6008	10.5694
Lox	ENSMUSG00000024529	2.06118	0.0084935	0.280375	6.9486	0.0894965
Tpd52	ENSMUSG00000027506	1.10823	0.00848455	0.280375	23.6692	10.0809
Nrxn3	ENSMUSG00000066392	1.82459	0.00847852	0.280375	4.28607	0.493258
Mttp	ENSMUSG00000028158	-1.31261	0.00869059	0.283146	11.0436	33.9369
Sf3b3	ENSMUSG00000033732	0.79263	0.00866263	0.283146	68.4277	38.2692
Hecw2	ENSMUSG00000042807	0.921168	0.00868964	0.283146	36.7213	18.6376
NA	ENSMUSG00000078862	-1.08134	0.00867091	0.283146	57.6927	135.328
NA	ENSMUSG00000090185	-1.42001	0.00864404	0.283146	578.44	1826.18
Nppb	ENSMUSG00000029019	0.886631	0.00871564	0.283224	1920.81	1048.01
Tec	ENSMUSG00000029217	0.957183	0.008757	0.283831	171.736	85.7234
Mrc2	ENSMUSG00000020695	1.67469	0.00881775	0.285062	17.3929	3.57067
Akap2	ENSMUSG00000038729	1.12352	0.00886677	0.285574	25.2359	10.5228
Adam12	ENSMUSG00000054555	1.57382	0.00887926	0.285574	2.85542	0.599962
Meis3	ENSMUSG00000041420	1.18697	0.0089742	0.287888	50.6152	21.3953
Nhs	ENSMUSG00000059493	-1.7145	0.00901312	0.288223	1.25839	6.48966
Athl1	ENSMUSG00000062031	1.82726	0.00903072	0.288223	5.4885	0.834546
Pdgfb	ENSMUSG00000000489	1.46759	0.0091254	0.289766	21.3006	7.227
Ctdspl	ENSMUSG00000047409	1.31347	0.00911045	0.289766	20.3605	7.96211
Pparg	ENSMUSG00000000440	0.888531	0.00922477	0.290708	85.1241	45.1377
Pdk4	ENSMUSG00000019577	-1.69914	0.00921417	0.290708	87.18	378.108
Gm15708	ENSMUSG00000086894	-1.139	0.00918481	0.290708	32.9414	76.2244
Spib	ENSMUSG00000008193	-1.14228	0.0093404	0.293612	60.6528	151.257
Fkbp4	ENSMUSG00000030357	-1.01633	0.00962462	0.301034	43.4236	94.7602
Hrc	ENSMUSG00000038239	-1.15739	0.0096035	0.301034	489.365	1183.12
Stk39	ENSMUSG00000027030	-0.791081	0.00969821	0.302579	304.573	547.033
Myo1d	ENSMUSG00000035441	0.86242	0.00977265	0.304143	46.7418	24.7356
Pxdn	ENSMUSG00000020674	-0.926932	0.00992851	0.305201	49.3522	98.4613
Fbxo32	ENSMUSG00000022358	-0.676085	0.00992616	0.305201	150.76	241.433
Sh3d19	ENSMUSG00000028082	1.05419	0.0099363	0.305201	36.7926	16.83
Tln1	ENSMUSG00000028465	1.11095	0.00990614	0.305201	247.243	107.719
Cdipt	ENSMUSG00000030682	1.42135	0.00991752	0.305201	22.2265	5.47317
Myl3	ENSMUSG00000059741	-0.654882	0.00995302	0.305201	1061.07	1689.47
Ahr	ENSMUSG00000019256	1.65446	0.00999863	0.305851	7.8741	1.40865
G6pdx	ENSMUSG00000031400	1.23184	0.0100783	0.307535	27.1687	9.33807
N6amt1	ENSMUSG00000044442	-0.953129	0.0101146	0.307735	103.77	209.957
Dusp18	ENSMUSG00000047205	-1.00166	0.0101586	0.307735	53.7711	116.335
2310015A10Rik	ENSMUSG00000097729	-1.14619	0.010136	0.307735	113.15	288.56
Atp8b1	ENSMUSG00000039529	1.2021	0.0101911	0.307972	9.85886	4.24563
Pik3cd	ENSMUSG00000039936	-1.16886	0.0102651	0.309047	17.5451	43.7378
Tmed5	ENSMUSG00000063406	-1.45159	0.010276	0.309047	23.9037	70.7923
NA	ENSMUSG00000064193	1.119	0.0103251	0.309778	312.61	133.856
NA	ENSMUSG00000085603	-1.33162	0.0105363	0.315357	8.77224	24.8209
Cpn2	ENSMUSG00000023176	-1.22893	0.0106604	0.316799	41.7521	110.011
Ndrg4	ENSMUSG00000036564	1.31829	0.0106497	0.316799	306.165	119.966
LOC102639045	ENSMUSG00000086324	1.5715	0.010627	0.316799	12655.2	3883.85
2200002D01Rik	ENSMUSG00000030587	1.35838	0.0107031	0.316836	32.6011	9.06953
Sorbs2os	ENSMUSG00000085440	1.46943	0.0107123	0.316836	494.039	200.264
Sh3bp2	ENSMUSG00000054520	1.53421	0.0107674	0.317716	26.88	7.53758
Syt13	ENSMUSG00000027220	1.9258	0.0108521	0.31946	2.23291	0.0834215
Mettl7a1	ENSMUSG00000054619	-0.876915	0.0109175	0.320632	110.451	209.192
Rhbdf1	ENSMUSG00000020282	1.23323	0.0110189	0.322227	70.0443	27.9143
Tox3	ENSMUSG00000043668	1.34904	0.0110275	0.322227	59.9409	24.4115
NA	ENSMUSG00000101941	-1.55892	0.0110491	0.322227	20.3252	102.198
Man1c1	ENSMUSG00000037306	-1.06577	0.0111395	0.324106	153.681	354.427
Apbb2	ENSMUSG00000029207	0.918911	0.0112209	0.325718	263.555	140.676
2810474O19Rik	ENSMUSG00000032712	0.826649	0.0112688	0.326352	319.999	183.808
NA	ENSMUSG00000092741	1.39922	0.0113891	0.329073	591.919	194.105
Elk1	ENSMUSG00000009406	-0.719824	0.0115318	0.331218	101.272	167.132
Sun3	ENSMUSG00000040985	-1.86346	0.0115028	0.331218	21.5522	159.477
NA	ENSMUSG00000101995	-1.09267	0.0115427	0.331218	236.809	545.026
A530016L24Rik	ENSMUSG00000043122	-1.1062	0.0115862	0.331485	51.678	133.954
Cemip	ENSMUSG00000052353	1.62941	0.011605	0.331485	2.88226	0.24738
Abca5	ENSMUSG00000018800	1.1709	0.0118457	0.336773	28.0827	11.5942
Ccdc167	ENSMUSG00000024018	-1.2207	0.0118978	0.336773	10.4139	27.5466
Ddn	ENSMUSG00000059213	1.80511	0.0118647	0.336773	6.61361	1.01214
NA	ENSMUSG00000089045	1.94252	0.0118844	0.336773	211.193	8.25816
Pcf11	ENSMUSG00000041328	-0.593112	0.0119268	0.33683	155.03	237.429
NA	ENSMUSG00000078887	-1.16852	0.0119807	0.337592	30.3072	73.1176
Ier3	ENSMUSG00000003541	1.25853	0.0122123	0.341808	277.503	109.199
Scnn1a	ENSMUSG00000030340	-1.69937	0.0121583	0.341808	1.38638	7.90078
NA	ENSMUSG00000100131	-1.49668	0.0121938	0.341808	148.271	506.901
Ppfibp2	ENSMUSG00000036528	-0.867303	0.0122397	0.341809	187.106	351.153
Tgfb3	ENSMUSG00000021253	1.35525	0.0123135	0.342343	26.3255	9.82997
Cnst	ENSMUSG00000038949	-0.652729	0.0123017	0.342343	311.402	495.712
Vcan	ENSMUSG00000021614	1.05961	0.0123472	0.342519	26.4166	12.0077
Gp1ba	ENSMUSG00000050675	-1.35368	0.0123755	0.342544	11.8932	38.5502
Npas2	ENSMUSG00000026077	-1.43307	0.012406	0.342631	16.5481	57.9461
Grk5	ENSMUSG00000003228	1.1175	0.012582	0.345963	110.689	52.7411
Hip1	ENSMUSG00000039959	1.28299	0.0125555	0.345963	43.3444	17.3339
Trim63	ENSMUSG00000028834	-0.810856	0.0126314	0.346561	1316.56	2387.72
Kifc5b	ENSMUSG00000024301	1.58711	0.0128779	0.352551	10.3361	2.79953
Mki67	ENSMUSG00000031004	1.27366	0.012918	0.352876	15.731	7.13535
Camta1	ENSMUSG00000014592	0.775921	0.0130485	0.355528	570.982	333.026
Gpr182	ENSMUSG00000058396	-1.03672	0.0130719	0.355528	27.1614	60.7277
Dchs1	ENSMUSG00000036862	1.45105	0.0132756	0.360284	3.48335	1.3467
Prkcd	ENSMUSG00000021948	1.27147	0.0135653	0.361513	84.6933	32.3829
Robo1	ENSMUSG00000022883	1.71707	0.013569	0.361513	5.7667	1.39391
Fads3	ENSMUSG00000024664	0.949054	0.0134927	0.361513	133.992	67.3643
Elf4	ENSMUSG00000031103	0.950895	0.0134345	0.361513	83.3003	42.6878
Thsd4	ENSMUSG00000032289	1.09832	0.0136051	0.361513	17.1987	7.45427
Ctnna1	ENSMUSG00000037815	0.631757	0.0136098	0.361513	887.226	562.381
Amot	ENSMUSG00000041688	1.52828	0.0135326	0.361513	7.41538	2.10942
ATP6	ENSMUSG00000064357	-1.1539	0.013492	0.361513	188.176	441.515
NA	ENSMUSG00000073485	-1.25085	0.0134104	0.361513	8.15903	22.2273
Nynrin	ENSMUSG00000075592	1.77921	0.0135219	0.361513	2.5744	0.711154
Arhgdia	ENSMUSG00000025132	1.18271	0.0136423	0.361607	156.444	65.1082
Tep1	ENSMUSG00000006281	0.875311	0.013767	0.364141	75.2891	40.2628
Slc25a47	ENSMUSG00000048856	-1.51574	0.0139855	0.369139	11.3156	32.346
NA	ENSMUSG00000083170	-1.28704	0.0140161	0.369168	10.4272	31.6228
Prmt2	ENSMUSG00000020230	1.02245	0.0141077	0.370107	33.5664	14.8719
Usp10	ENSMUSG00000031826	0.738465	0.0141109	0.370107	87.3627	51.8744
Jak1	ENSMUSG00000028530	-0.773509	0.0142044	0.37078	203.313	366.525
Gdf15	ENSMUSG00000038508	1.31414	0.0142254	0.37078	43.1086	14.5632
NA	ENSMUSG00000083863	-1.21768	0.0142117	0.37078	76.0896	187.182
Il17ra	ENSMUSG00000002897	1.44081	0.0142896	0.371679	7.46541	2.65758
Agfg1	ENSMUSG00000026159	0.680406	0.014376	0.372235	87.2537	53.7234
Palm2	ENSMUSG00000090053	1.38765	0.0144003	0.372235	34.6383	13.0828
NA	ENSMUSG00000092563	-1.80652	0.0143747	0.372235	17.2742	99.1499
5430405H02Rik	ENSMUSG00000085741	-1.14676	0.0144365	0.372401	65.2716	155.609
Tcap	ENSMUSG00000007877	-1.14591	0.0146155	0.374324	829.892	1917.56
Ppil1	ENSMUSG00000024007	-1.34505	0.0146252	0.374324	16.2409	47.4556
Slc7a1	ENSMUSG00000041313	-0.870035	0.0146307	0.374324	40.8595	76.5998
NA	ENSMUSG00000100954	-1.16367	0.0145857	0.374324	47.3021	120.437
Diap3	ENSMUSG00000022021	1.82851	0.0147202	0.375846	5.01983	0.520439
Tmem115	ENSMUSG00000010045	1.56002	0.0147538	0.375935	23.4932	7.01452
Tsc22d1	ENSMUSG00000022010	1.08626	0.0148526	0.377684	144.581	66.3136
Lrrc59	ENSMUSG00000020869	1.07978	0.0149651	0.379772	32.8969	14.8408
Fam214b	ENSMUSG00000036002	1.05198	0.0150809	0.381938	189.127	86.8185
Shroom3	ENSMUSG00000029381	1.23322	0.0151499	0.382139	632.996	253.301
Ier5	ENSMUSG00000056708	1.3265	0.0151245	0.382139	58.5451	21.2976
Zhx1	ENSMUSG00000022361	-0.640045	0.0152591	0.382711	159.133	253.105
Mvp	ENSMUSG00000030681	1.21283	0.0152644	0.382711	70.4887	28.4909
NA	ENSMUSG00000089791	0.976785	0.0152302	0.382711	103.2	48.657
Nars	ENSMUSG00000024587	1.04637	0.0153365	0.382983	100.763	45.9717
Mapk1ip1	ENSMUSG00000041775	-0.907992	0.015312	0.382983	348.476	682.456
Pld2	ENSMUSG00000020828	0.931167	0.0154378	0.384746	37.4162	19.1993
Cd93	ENSMUSG00000027435	-1.41602	0.0156991	0.389704	10.3122	37.5245
Thbs1	ENSMUSG00000040152	1.31169	0.0156748	0.389704	20.4603	7.29374
Hmox1	ENSMUSG00000005413	1.52118	0.015777	0.390862	15.4336	3.79761
Adamts4	ENSMUSG00000006403	1.85691	0.0158512	0.391152	3.52966	0.1673
Atoh8	ENSMUSG00000037621	1.09733	0.0158349	0.391152	45.0274	20.0599
Fam178a	ENSMUSG00000036097	-0.768089	0.0159459	0.391944	191.289	342.594
Adamts2	ENSMUSG00000036545	1.12103	0.0159186	0.391944	31.5059	13.609
NA	ENSMUSG00000083563	-1.13357	0.0160124	0.392807	132.726	307.301
A130010J15Rik	ENSMUSG00000079144	1.45184	0.0160964	0.394095	8.04073	3.11245
Plxna1	ENSMUSG00000030084	0.768022	0.0161486	0.3946	39.6563	23.3904
Cacna1g	ENSMUSG00000020866	-1.17243	0.016375	0.396262	61.6056	156.246
Pxdc1	ENSMUSG00000021411	1.44039	0.0163575	0.396262	9.12545	0.932889
Gsn	ENSMUSG00000026879	-1.11323	0.0163212	0.396262	39.7375	108.98
Gm14325	ENSMUSG00000095362	-1.14603	0.0163148	0.396262	42.924	110.457
D830015G02Rik	ENSMUSG00000097652	-1.0641	0.0163694	0.396262	6769.27	14444.1
Muc4	ENSMUSG00000079620	-1.31841	0.0164241	0.396684	36.9169	122.211
Dnase1l2	ENSMUSG00000024136	-1.21467	0.0165052	0.397873	48.2074	118.721
Cacnb3	ENSMUSG00000003352	1.46865	0.01676	0.398702	7.69864	2.05802
Pvrl3	ENSMUSG00000022656	0.968007	0.0167589	0.398702	19.6315	9.67843
Arhgap19	ENSMUSG00000025154	1.06683	0.0167626	0.398702	8.77735	3.91198
Rps20	ENSMUSG00000028234	-0.828968	0.0165909	0.398702	28.1242	52.2057
Glrx3	ENSMUSG00000031068	0.860215	0.0167033	0.398702	48.4214	27.0298
Nmnat3	ENSMUSG00000032456	-1.24284	0.0167407	0.398702	41.079	111.426
Tdrd9	ENSMUSG00000054003	1.03785	0.0166129	0.398702	21.4869	9.86026
Ankrd28	ENSMUSG00000014496	0.971146	0.016989	0.40332	163.376	81.4218
Mllt4	ENSMUSG00000068036	0.972541	0.0170931	0.405022	322.165	158.951
Ranbp17	ENSMUSG00000040594	1.54732	0.0173315	0.409894	8.94662	2.71603
Adamts1	ENSMUSG00000022893	1.05568	0.017664	0.416971	42.007	18.4649
Adamts15	ENSMUSG00000033453	1.6047	0.0178126	0.419685	12.0706	3.56221
Lpin2	ENSMUSG00000024052	1.0098	0.017853	0.419847	20.3895	9.23472
COX2	ENSMUSG00000064354	-1.12463	0.0179028	0.420228	220.801	549.031
Tbc1d19	ENSMUSG00000039178	0.894424	0.0179736	0.420749	160.924	83.0854
Cacna2d4	ENSMUSG00000041460	-0.815402	0.0180258	0.420749	7.31817	12.9975
NA	ENSMUSG00000102070	-1.12821	0.0180129	0.420749	223.233	557.832
Ggnbp1	ENSMUSG00000048731	-0.749643	0.018095	0.420793	192.211	329.212
NA	ENSMUSG00000097236	-1.45918	0.0180695	0.420793	20.8077	70.7685
NA	ENSMUSG00000085643	-1.42865	0.0181708	0.421515	29.282	113.104
AA415398	ENSMUSG00000087385	-1.39261	0.0181934	0.421515	10.6256	33.9261
Atcay	ENSMUSG00000034958	-1.29862	0.018452	0.426075	88.6659	324.272
NA	ENSMUSG00000074527	-1.2115	0.0184584	0.426075	8.72699	22.4189
Ncf2	ENSMUSG00000026480	-0.998536	0.0185423	0.426573	6.24513	14.297
Sars	ENSMUSG00000068739	0.913984	0.0185481	0.426573	95.9288	49.6959
Ankrd6	ENSMUSG00000040183	0.868207	0.0186885	0.427529	19.5168	9.95274
Ifitm10	ENSMUSG00000045777	1.40559	0.0186922	0.427529	6.75731	1.97015
[truncated: 40,582 more rows]

## Sheet: BZ_vs_LV
Gene_symbol	Gene_ENSEMBL	log2FoldChange	pvalue	padj	BZ_geo_RPK	LV_geo_RPK
[truncated: 41,128 more rows]
