# Supplementary material for: Epigenetic State Changes Underlie Metabolic Switch in Mouse Post-Infarction Border Zone Cardiomyocytes
Source: J Cardiovasc Dev Dis. 2021 Oct 22;8(11):134. doi: 10.3390/jcdd8110134 (PMC8620718; doi:10.3390/jcdd8110134)
Supplement: Supplementary file 1 [file jcdd-08-00134-s001.zip › Suppl Table 2.xlsx]

## Sheet: H3K27ac_differential_signal
bin coordinates			H3K27ac differential signal		Quantile normalized H3K27ac signal counts
chr	start	end	log2(FC)	P-adj	BZ1	BZ2	BZ3	LV1	LV2	LV3
chr9	78623250	78623750	4.87087	2.03135e-14	66	72	55	0	0	0
chr9	78623000	78623500	4.51376	5.31561e-12	50	63	37	0	0	0
chr9	78623500	78624000	4.46215	8.78257e-12	38	55	50	0	0	0
chr13	33028500	33029000	4.24147	2.51929e-11	54	49	39	0	0	1
chr13	33028750	33029250	4.19176	5.34937e-11	46	46	44	0	1	0
chr1	186516250	186516750	4.15439	8.37699e-10	53	26	38	0	0	0
chr18	69985000	69985500	4.11409	2.08512e-10	51	32	48	0	1	0
chr11	72847750	72848250	4.08431	7.72135e-12	66	69	35	1	0	2
chr15	87654250	87654750	4.06684	3.84052e-10	41	52	33	0	0	1
chr7	142905750	142906250	3.99838	5.15449e-09	38	32	31	0	0	0
chr15	87654000	87654500	3.99787	5.21546e-09	36	40	26	0	0	0
chr7	84333750	84334250	3.99211	1.71512e-10	55	40	42	0	2	0
chr13	33029000	33029500	3.99061	5.66848e-09	33	40	28	0	0	0
chr2	117748500	117749000	3.96953	7.55413e-09	29	37	33	0	0	0
chr7	100100000	100100500	3.96831	7.55545e-09	36	35	28	0	0	0
chr19	53543250	53543750	3.96273	8.16961e-09	26	43	31	0	0	0
chr1	118369000	118369500	3.96018	1.24551e-12	65	63	57	2	0	3
chr7	24387500	24388000	3.91354	8.70732e-10	62	26	47	0	0	2
chr1	160877250	160877750	3.90404	3.33417e-09	41	32	38	0	1	0
chr11	72846750	72847250	3.86032	2.93713e-08	29	26	37	0	0	0
chr3	81378000	81378500	3.85265	5.08135e-11	62	40	55	0	2	2
chr13	33028250	33028750	3.80954	2.30985e-09	40	40	39	0	0	2
chr15	52847500	52848000	3.80507	6.00019e-08	30	49	16	0	0	0
chr11	72846500	72847000	3.78883	6.2682e-08	33	26	28	0	0	0
chr2	157376250	157376750	3.78651	2.08512e-10	65	32	56	2	1	1
chr18	69985250	69985750	3.7542	1.88217e-10	49	52	44	2	2	0
chr2	157376000	157376500	3.74954	1.24411e-09	54	35	42	2	1	0
chr15	87654500	87655000	3.73507	1.44967e-09	50	49	31	1	0	2
chr6	91205750	91206250	3.73451	1.17902e-07	33	37	17	0	0	0
chr2	172460500	172461000	3.73418	3.33792e-08	48	32	22	0	1	0
chr3	81377750	81378250	3.7301	7.72135e-12	87	40	67	1	3	3
chr18	69919250	69919750	3.70874	9.80093e-09	46	29	37	0	1	1
chr12	111186500	111187000	3.69836	1.03519e-08	42	32	37	2	0	0
chr3	81376750	81377250	3.68492	6.15061e-08	42	20	36	0	1	0
chr6	60046000	60046500	3.684	2.16871e-07	44	20	21	0	0	0
chr19	53543500	53544000	3.68194	2.14626e-07	18	37	28	0	0	0
chr3	81376500	81377000	3.68168	6.8578e-08	44	17	39	0	1	0
chr3	83844250	83844750	3.67433	2.27912e-07	30	20	31	0	0	0
chr17	75255750	75256250	3.67011	8.30908e-12	73	58	50	0	4	3
chr2	108685750	108686250	3.66927	6.64394e-08	44	32	21	1	0	0
chr9	22089750	22090250	3.66903	1.77947e-08	34	52	26	2	0	0
chr14	36527000	36527500	3.66875	2.38405e-07	26	23	31	0	0	0
chr14	65900000	65900500	3.65084	9.75369e-10	49	49	37	2	1	1
chr2	167399500	167400000	3.63488	1.05773e-07	40	20	34	0	0	1
chr3	56706500	56707000	3.6344	7.55545e-09	57	29	37	1	2	0
chr18	69919500	69920000	3.63317	2.96221e-08	44	26	37	0	0	2
chr7	142905500	142906000	3.6331	9.54913e-08	36	35	22	1	0	0
chr14	62992000	62992500	3.63185	1.49103e-11	63	61	51	1	1	5
chr9	96783250	96783750	3.62897	9.71317e-08	33	29	29	0	1	0
chr14	18565000	18565500	3.62642	3.85894e-07	38	23	19	0	0	0
chr13	13638250	13638750	3.62304	1.18918e-07	36	20	37	0	1	0
chr15	59760500	59761000	3.62022	1.47608e-09	44	43	44	1	1	2
chr15	52847250	52847750	3.61215	4.55382e-07	20	40	20	0	0	0
chr13	32370000	32370500	3.60964	8.16961e-09	41	35	41	1	0	2
chr7	40064750	40065250	3.60769	3.95094e-08	37	26	42	0	2	0
chr14	65899250	65899750	3.60202	5.03633e-07	33	17	28	0	0	0
chr18	69984750	69985250	3.59981	1.25887e-09	58	29	63	2	3	0
chr2	117748250	117748750	3.59786	4.99898e-07	28	26	22	0	0	0
chr7	84333500	84334000	3.59685	1.16882e-08	53	29	37	2	1	0
chr7	84334000	84334500	3.59547	2.41928e-09	48	40	42	1	3	0
chr11	72848000	72848500	3.59245	2.71807e-10	54	75	34	2	0	4
chr2	117748750	117749250	3.5915	9.03644e-10	36	55	54	1	0	4
chr14	65901000	65901500	3.58822	5.6724e-07	25	20	31	0	0	0
chr3	56706250	56706750	3.58127	5.48016e-08	48	26	30	1	1	0
chr8	7909000	7909500	3.57343	1.46026e-08	38	32	45	2	1	0
chr8	45525500	45526000	3.5718	2.20079e-07	45	23	23	0	1	0
chr14	65899500	65900000	3.56936	5.52033e-08	40	32	29	1	1	0
chr2	108622750	108623250	3.56771	8.59112e-08	33	20	54	2	0	0
chr18	69985500	69986000	3.56013	5.14697e-09	37	37	54	2	2	0
chr13	94190500	94191000	3.55752	7.85157e-07	28	32	16	0	0	0
chr8	123410000	123410500	3.55603	7.29091e-08	26	46	30	0	0	2
chr14	65901500	65902000	3.55408	6.544e-08	34	37	29	0	2	0
chr11	86650500	86651000	3.55209	3.04888e-07	16	49	28	1	0	0
chr2	108623500	108624000	3.54981	4.95004e-09	41	40	44	0	2	2
chr3	81375750	81376250	3.54649	4.45135e-10	71	43	41	3	2	1
chr16	22133250	22133750	3.54342	2.60889e-07	32	29	25	1	0	0
chr13	110923500	110924000	3.54016	9.39431e-07	21	20	33	0	0	0
chr14	65901250	65901750	3.53744	2.87244e-07	26	35	25	0	1	0
chr14	62991750	62992250	3.53526	4.16703e-10	49	55	48	5	1	0
chr9	78622750	78623250	3.53487	1.00276e-06	33	29	14	0	0	0
chr11	86651250	86651750	3.53123	1.00237e-06	30	20	23	0	0	0
chr11	59600750	59601250	3.52987	5.89739e-10	54	37	60	2	2	2
chr1	193419750	193420250	3.52904	3.33674e-07	36	32	19	0	0	1
chr7	100099750	100100250	3.51515	1.18672e-06	21	29	22	0	0	0
chr1	31156750	31157250	3.51382	1.08975e-07	34	35	28	0	0	2
chr4	147997750	147998250	3.50945	9.87991e-09	50	32	41	0	2	2
chr17	9821250	9821750	3.50769	4.28828e-07	38	29	19	0	1	0
chr2	117710250	117710750	3.50729	1.2712e-06	24	23	24	0	0	0
chr7	142906000	142906500	3.50474	9.63981e-09	37	52	34	2	0	2
chr2	49934500	49935000	3.49139	4.93792e-07	28	35	21	1	0	0
chr6	91206000	91206500	3.48998	5.01312e-07	32	32	20	1	0	0
chr2	49930000	49930500	3.48642	5.39884e-07	36	20	28	1	0	0
chr9	22090000	22090500	3.48437	5.35303e-07	26	37	21	1	0	0
chr15	59759000	59759500	3.4839	2.00306e-07	38	20	40	0	2	0
chr14	65901750	65902250	3.4714	6.25329e-07	28	35	20	0	1	0
chr2	108678000	108678500	3.47082	1.83727e-06	21	29	20	0	0	0
chr7	133847750	133848250	3.46726	7.10718e-07	21	43	21	0	1	0
chr13	6126750	6127250	3.46684	1.95101e-06	17	26	27	0	0	0
chr3	42752750	42753250	3.4657	1.91383e-06	24	23	22	0	0	0
chr7	109853000	109853500	3.46322	6.66361e-07	34	26	22	1	0	0
chr14	60427750	60428250	3.46269	6.55896e-07	29	26	26	1	0	0
chr13	6127000	6127500	3.46263	2.00005e-06	24	20	25	0	0	0
chr7	89559250	89559750	3.45789	2.46961e-08	42	32	46	0	4	0
chr2	149863750	149864250	3.45713	8.2943e-07	22	46	18	0	1	0
chr16	15650750	15651250	3.45221	2.25764e-06	20	20	29	0	0	0
chr3	146307250	146307750	3.45081	8.32533e-07	20	40	23	0	0	1
chr13	52516000	52516500	3.45003	2.33346e-06	18	35	18	0	0	0
chr13	49444250	49444750	3.44951	1.46857e-09	46	49	46	1	1	4
chr6	43292250	43292750	3.4477	7.61997e-09	33	61	39	3	2	0
chr1	6279250	6279750	3.4472	7.87664e-07	26	29	25	0	0	1
chr8	45525250	45525750	3.44713	2.56039e-07	40	26	28	2	0	0
chr11	103678500	103679000	3.44435	1.18918e-07	24	63	26	2	1	0
chr1	6287750	6288250	3.43838	2.72417e-06	38	14	20	0	0	0
chr18	10851000	10851500	3.4361	2.55418e-06	26	23	19	0	0	0
chrX	142898750	142899250	3.43433	2.65883e-06	20	20	28	0	0	0
chr13	52175500	52176000	3.43187	9.28496e-07	26	26	27	0	0	1
chr1	118369250	118369750	3.43035	1.07681e-07	34	26	45	2	0	1
chr4	89049500	89050000	3.42823	3.29386e-07	38	26	28	0	0	2
chr7	133848000	133848500	3.42802	4.79359e-08	37	63	23	0	3	1
chr16	45930000	45930500	3.42549	1.19234e-06	25	17	40	0	1	0
chr14	13022500	13023000	3.424	3.08018e-06	34	12	25	0	0	0
chr15	28131750	28132250	3.42375	2.89891e-06	18	29	21	0	0	0
chr17	9865250	9865750	3.42256	1.07789e-07	40	26	38	2	1	0
chr2	117710500	117711000	3.42207	2.91355e-06	20	23	24	0	0	0
chr4	57799000	57799500	3.4189	3.77078e-08	36	37	43	0	4	0
chr3	81375500	81376000	3.41413	2.69434e-09	77	35	46	0	1	6
chr13	33029250	33029750	3.41211	1.29988e-06	38	17	26	0	1	0
chr2	113233500	113234000	3.40576	3.44217e-06	24	29	15	0	0	0
chr12	112797250	112797750	3.40374	5.76334e-08	46	49	24	0	4	0
chr2	157376500	157377000	3.40167	7.52121e-08	63	26	33	4	0	0
chr14	106012250	106012750	3.39692	2.51929e-11	67	58	59	0	5	5
chr5	96513250	96513750	3.39439	3.74534e-06	26	20	20	0	0	0
chr13	75420750	75421250	3.39034	3.92729e-06	24	17	25	0	0	0
chr9	20367250	20367750	3.38964	1.66089e-06	40	20	20	0	0	1
chr10	41564750	41565250	3.3883	1.49041e-07	33	40	28	1	2	0
chr17	72958750	72959250	3.38451	1.55158e-06	30	23	24	1	0	0
chr15	52847750	52848250	3.38399	1.51205e-07	33	35	32	2	1	0
chr7	100100250	100100750	3.38155	4.80241e-06	38	9	25	0	0	0
chr5	149340000	149340500	3.37937	1.66462e-07	29	37	34	2	1	0
chr15	28133000	28133500	3.37711	1.71512e-10	61	52	59	7	1	1
chr2	172460750	172461250	3.3733	5.91106e-08	45	37	30	2	2	0
chr3	81378250	81378750	3.37222	6.32681e-07	30	23	35	1	0	1
chr14	36526750	36527250	3.37218	4.69837e-06	16	29	21	0	0	0
chr15	59760250	59760750	3.3714	7.72135e-12	65	63	63	4	3	4
chr5	149507750	149508250	3.37031	4.7957e-06	30	17	19	0	0	0
chr14	18564750	18565250	3.37031	4.7957e-06	30	17	19	0	0	0
chr3	145685750	145686250	3.36381	4.95594e-06	22	26	17	0	0	0
chr5	138708250	138708750	3.3607	2.51882e-06	24	14	42	0	0	1
chr13	34715000	34715500	3.35706	2.35891e-06	41	20	18	0	0	1
chr14	18565250	18565750	3.35665	5.2574e-06	21	23	20	0	0	0
chr6	60045750	60046250	3.35555	3.5887e-08	59	29	37	2	0	3
chr15	59758750	59759250	3.35547	2.80619e-07	44	23	33	0	1	2
chr12	112796750	112797250	3.35532	2.87244e-07	45	35	22	0	3	0
chr14	65899750	65900250	3.35281	2.5489e-08	44	37	41	4	1	0
chr5	149340250	149340750	3.35225	8.2943e-07	21	35	32	0	2	0
chr17	75255250	75255750	3.34917	7.85623e-09	41	46	45	2	0	4
chr4	147984000	147984500	3.34895	6.47175e-10	59	49	47	3	4	1
chr8	115334000	115334500	3.34889	2.30283e-06	29	29	18	0	1	0
chr8	7909250	7909750	3.34852	5.78098e-06	22	17	25	0	0	0
chr14	106012500	106013000	3.33824	2.74371e-06	38	20	19	0	1	0
chr1	82804500	82805000	3.33665	8.86167e-07	30	26	29	0	1	1
chr13	33051000	33051500	3.33643	2.65255e-06	20	32	23	0	0	1
chr3	146307500	146308000	3.33616	3.29386e-07	29	40	29	0	0	3
chrX	64087500	64088000	3.33581	9.28496e-07	24	32	30	0	2	0
chr1	143391500	143392000	3.33229	9.54913e-08	32	40	36	2	2	0
chr1	118368750	118369250	3.33199	2.12311e-11	62	61	63	2	3	6
chr6	91206250	91206750	3.32712	2.82954e-06	28	26	20	0	0	1
chr13	33029500	33030000	3.32682	3.02795e-06	36	17	23	0	1	0
chr7	40064500	40065000	3.32578	7.3452e-06	26	12	27	0	0	0
chr16	36907750	36908250	3.32552	6.98507e-06	25	20	18	0	0	0
chr11	86650750	86651250	3.32536	3.25704e-06	13	37	28	1	0	0
chr12	112796500	112797000	3.32172	5.25279e-07	53	26	23	0	3	0
chr2	108623000	108623500	3.31931	7.2561e-09	41	40	63	5	0	2
chr13	94190250	94190750	3.31846	7.43964e-06	20	26	17	0	0	0
chr9	96783000	96783500	3.31564	3.97669e-07	38	26	32	1	2	0
chr7	133849000	133849500	3.31342	7.72636e-06	21	20	21	0	0	0
chr7	100100750	100101250	3.31301	8.52293e-06	30	9	28	0	0	0
chr13	54144750	54145250	3.31075	8.52765e-06	21	37	10	0	0	0
chr2	149864000	149864500	3.30912	3.78458e-06	25	40	13	0	1	0
chr2	157377750	157378250	3.3024	1.84551e-06	40	14	35	0	2	0
chr15	62484000	62484500	3.30177	1.62901e-06	38	17	32	2	0	0
chr17	75258250	75258750	3.30132	1.66089e-06	44	29	16	2	0	0
chr1	191628000	191628500	3.30086	8.9554e-06	21	32	12	0	0	0
chr6	86768500	86769000	3.30085	8.95706e-06	28	26	11	0	0	0
chr3	56706750	56707250	3.30085	1.38414e-06	33	26	25	0	2	0
chr2	93881000	93881500	3.30075	3.78458e-06	24	35	16	1	0	0
chr11	29656750	29657250	3.29942	5.09104e-09	55	43	41	2	4	1
chr4	141879750	141880250	3.29641	1.42225e-06	34	29	21	1	1	0
chr9	57601000	57601500	3.2964	9.00298e-06	26	17	19	0	0	0
chr13	109214500	109215000	3.29621	9.37519e-06	30	12	22	0	0	0
chr10	15058250	15058750	3.29162	9.37123e-06	26	20	16	0	0	0
chr1	143391750	143392250	3.29032	5.35303e-07	34	26	34	1	2	0
chr17	5822000	5822500	3.29032	9.71317e-08	61	37	25	4	1	0
chr8	45527250	45527750	3.28696	4.33388e-06	22	20	30	0	0	1
chr2	49930250	49930750	3.28023	4.91788e-06	33	14	27	0	1	0
chr7	84332500	84333000	3.27972	2.68744e-08	42	40	45	1	5	0
chr17	64743750	64744250	3.27689	5.06143e-06	29	35	12	1	0	0
chr3	39269500	39270000	3.27654	1.1151e-05	30	23	11	0	0	0
chr5	149508000	149508500	3.27328	7.34571e-07	40	35	20	0	1	2
chr11	59601000	59601500	3.27254	7.55545e-09	40	49	47	4	1	2
chr11	86646250	86646750	3.26862	2.55502e-12	86	58	80	2	7	6
chr18	67750000	67750500	3.26762	5.54627e-06	16	40	19	1	0	0
chr2	108623750	108624250	3.26231	5.96248e-06	25	14	34	0	1	0
chr13	32370250	32370750	3.26146	6.37602e-08	51	23	55	2	1	3
chr10	118991250	118991750	3.26016	6.94856e-06	33	9	35	0	0	1
chr7	63770750	63771250	3.25911	3.16681e-06	54	17	19	0	2	0
chr3	152814000	152814500	3.25773	1.29295e-05	20	29	13	0	0	0
chr2	35776250	35776750	3.25655	1.35198e-05	24	32	9	0	0	0
chr7	133848250	133848750	3.25562	4.90787e-08	46	58	25	1	4	1
chr2	131721500	131722000	3.25434	8.06713e-07	37	29	26	2	0	1
chr11	25961500	25962000	3.25067	6.24425e-06	15	32	25	1	0	0
chr7	100100500	100101000	3.25067	1.34593e-05	25	17	18	0	0	0
chr8	64542250	64542750	3.25063	1.34223e-05	24	20	16	0	0	0
chr14	60428000	60428500	3.24996	2.3649e-06	24	29	28	2	0	0
chr9	96783500	96784000	3.24542	1.4454e-05	25	12	24	0	0	0
chr6	120276000	120276500	3.24473	6.36871e-06	21	32	18	0	1	0
chr8	45524250	45524750	3.24385	6.29867e-06	28	23	19	0	1	0
chr13	103977500	103978000	3.24385	6.29867e-06	28	23	19	0	1	0
chr11	72847250	72847750	3.24372	1.46644e-05	26	12	23	0	0	0
chr4	151124000	151124500	3.24205	3.41249e-10	57	58	49	3	3	4
chr18	75489250	75489750	3.24065	2.39861e-12	84	63	71	3	6	6
chr13	94731500	94732000	3.24031	1.04745e-07	36	35	40	2	2	1
chr3	54479500	54480000	3.24008	1.49288e-05	28	20	13	0	0	0
chr19	53543000	53543500	3.23981	2.8464e-06	34	32	17	2	0	0
chr12	112797000	112797500	3.23947	2.9367e-08	62	49	29	1	6	0
chr7	40065000	40065500	3.23777	4.46212e-07	33	29	41	0	4	0
chr4	11555500	11556000	3.23631	6.67638e-06	24	23	22	0	1	0
chr11	75399250	75399750	3.23505	7.45036e-06	29	14	28	0	0	1
chr10	96829000	96829500	3.23262	1.12996e-06	37	23	31	1	2	0
chr9	96782750	96783250	3.23232	3.00069e-06	33	20	28	2	0	0
chr1	186516000	186516500	3.23207	8.37699e-10	61	46	59	5	5	0
chr11	54030750	54031250	3.23128	5.8858e-08	50	32	41	0	4	2
chr16	45930250	45930750	3.23099	7.13966e-07	37	17	52	1	2	1
chr2	29344500	29345000	3.22999	1.2712e-06	45	26	22	2	0	1
chr15	62321250	62321750	3.22897	3.05455e-06	30	32	19	0	2	0
chr8	46083500	46084000	3.22501	8.19264e-06	33	14	24	0	0	1
chr8	24990250	24990750	3.22091	3.24309e-06	26	29	24	0	0	2
chr11	3905500	3906000	3.22078	1.19008e-06	32	29	28	0	2	1
chr13	34715250	34715750	3.22018	5.52832e-07	48	32	23	1	0	3
chr13	6127250	6127750	3.21799	8.19039e-06	24	17	28	1	0	0
chr8	45525750	45526250	3.21683	8.48034e-06	33	20	17	0	0	1
chr9	78623750	78624250	3.21509	1.83414e-05	17	26	16	0	0	0
chr17	75258500	75259000	3.21482	3.78458e-06	40	23	19	2	0	0
chr11	86651500	86652000	3.21398	1.83872e-05	21	17	20	0	0	0
chr11	86646000	86646500	3.21182	1.01055e-08	54	37	52	3	5	0
chr2	153191250	153191750	3.21171	1.86652e-05	21	20	17	0	0	0
chr13	75420500	75421000	3.21106	1.89788e-05	18	17	23	0	0	0
chr11	86651000	86651500	3.20813	1.37575e-06	29	35	25	2	0	1
chr11	72847500	72848000	3.20792	1.69086e-06	44	23	24	0	1	2
chr6	91207000	91207500	3.2079	3.74961e-06	24	35	21	2	0	0
chr2	168621000	168621500	3.20428	2.04317e-05	13	26	20	0	0	0
chr3	56705750	56706250	3.20313	9.14194e-06	18	26	24	1	0	0
chr13	32861250	32861750	3.20271	2.17676e-05	36	17	10	0	0	0
chr4	22938500	22939000	3.2011	3.86244e-06	24	32	22	0	1	1
chr1	31157000	31157500	3.20077	1.00174e-05	17	35	18	0	0	1
chr13	50100000	50100500	3.20052	2.30985e-09	54	55	41	4	2	3
chr14	65900750	65901250	3.19547	9.99065e-08	30	55	37	2	4	0
chr5	75377500	75378000	3.19406	1.00207e-05	21	29	18	0	1	0
chr10	33073250	33073750	3.19401	5.87286e-07	29	35	34	2	2	0
chr7	84336500	84337000	3.19316	6.00019e-08	63	26	45	2	4	1
chr2	157378000	157378500	3.19239	5.87322e-07	30	37	31	2	2	0
chr17	75258750	75259250	3.19172	4.30603e-06	30	29	19	1	0	1
chr9	37808500	37809000	3.19075	4.89895e-06	18	40	22	0	1	1
chr10	15058500	15059000	3.1901	2.33189e-05	29	14	16	0	0	0
chr17	6180000	6180500	3.18974	8.45106e-07	38	20	42	2	1	1
chr7	84332750	84333250	3.18903	3.21963e-08	44	40	44	0	3	4
chr10	56935000	56935500	3.18855	4.80381e-06	32	20	26	0	0	2
chr1	6288000	6288500	3.18602	2.38996e-05	26	14	18	0	0	0
chr2	35776000	35776500	3.18477	1.18329e-05	24	35	12	1	0	0
chr11	25961750	25962250	3.18326	2.39942e-05	21	20	16	0	0	0
chrX	64087750	64088250	3.18101	1.85232e-06	26	32	29	2	1	0
chr14	62991500	62992000	3.18057	8.26943e-07	41	32	27	4	0	0
chr13	108603500	108604000	3.1799	5.004e-06	30	29	19	0	2	0
chr15	41414000	41414500	3.17989	2.46819e-05	17	23	17	0	0	0
chr13	94731750	94732250	3.17985	2.06259e-06	32	23	32	0	2	1
chr7	35349250	35349750	3.17903	7.86137e-07	33	40	25	0	1	3
chr1	6279750	6280250	3.17735	1.15083e-08	44	49	44	2	1	5
chr8	24990000	24990500	3.17698	2.53661e-05	22	20	15	0	0	0
chr10	40152250	40152750	3.17685	7.07094e-07	34	35	28	2	2	0
chr11	54030500	54031000	3.17623	6.22954e-08	62	29	40	1	4	2
chr12	116181750	116182250	3.17424	2.60432e-05	24	17	16	0	0	0
chr4	5768500	5769000	3.17233	2.824e-06	18	29	42	0	1	2
chr17	35758250	35758750	3.17031	5.4408e-06	30	29	18	0	1	1
chr9	42209500	42210000	3.17024	3.31442e-07	44	32	32	1	4	0
chr11	4628500	4629000	3.16891	1.29658e-05	28	26	14	1	0	0
chr11	20896750	20897250	3.1687	1.18918e-07	30	52	36	2	3	1
chr14	45850500	45851000	3.16777	8.30908e-12	70	72	66	4	9	2
chr2	94046500	94047000	3.16754	1.29775e-05	28	23	16	0	1	0
chr9	42209250	42209750	3.16699	8.98884e-07	40	29	28	0	3	1
chr17	9821750	9822250	3.16217	1.4768e-05	33	12	24	1	0	0
chr15	84522750	84523250	3.16081	1.49356e-05	36	14	19	0	1	0
chr3	28197000	28197500	3.15945	1.62383e-05	15	43	14	0	0	1
chr15	84281000	84281500	3.15919	1.43364e-05	21	17	28	0	0	1
chr6	115292750	115293250	3.15902	9.63968e-07	38	26	32	2	0	2
chr15	67222250	67222750	3.15896	2.92847e-05	20	20	16	0	0	0
chr2	122115500	122116000	3.15896	3.1133e-05	34	12	14	0	0	0
chr3	54479750	54480250	3.15835	3.35531e-05	40	6	19	0	0	0
chr13	32884500	32885000	3.15835	3.01219e-05	24	23	11	0	0	0
chr11	29657000	29657500	3.15531	7.08999e-08	57	37	34	0	2	5
chr12	111187750	111188250	3.15354	2.86294e-06	40	29	19	2	1	0
chr5	31576000	31576500	3.15236	2.75157e-06	36	23	27	1	2	0
chr17	9821500	9822000	3.15207	1.27316e-06	46	29	23	1	0	3
chr2	108623250	108623750	3.14941	6.37602e-08	42	32	51	2	2	3
chr2	149931500	149932000	3.14876	6.81866e-06	20	29	27	2	0	0
chr15	52847000	52847500	3.1457	3.47684e-05	9	29	21	0	0	0
chr6	127041000	127041500	3.14497	7.96133e-08	51	32	44	2	5	0
chr12	88952500	88953000	3.1444	1.57364e-05	24	23	18	0	0	1
chr2	149932000	149932500	3.14426	6.00019e-08	46	35	43	1	2	4
chr12	7967000	7967500	3.14209	1.1151e-05	48	9	28	0	2	0
chr4	32405500	32406000	3.13859	3.46657e-06	42	23	22	2	0	1
chr2	110668750	110669250	3.13804	1.8493e-05	26	12	29	0	1	0
chr13	118789250	118789750	3.13733	8.98413e-06	16	23	39	2	0	0
chr4	57799250	57799750	3.13572	3.60074e-06	30	20	35	0	1	2
chr18	69985750	69986250	3.13535	6.49075e-07	29	29	48	2	3	0
chr9	123297250	123297750	3.13503	3.63835e-05	25	17	14	0	0	0
chr8	24975500	24976000	3.13395	1.02981e-10	98	49	61	2	6	7
chr4	151123250	151123750	3.13382	4.98219e-07	41	32	31	0	3	2
chr1	6280000	6280500	3.13048	5.66848e-09	54	37	63	4	2	4
chr8	85644750	85645250	3.13035	3.81832e-05	26	14	16	0	0	0
chr6	146674500	146675000	3.12957	3.46657e-06	33	23	28	0	2	1
chr6	146674750	146675250	3.1282	1.29576e-08	50	43	50	0	3	6
chr13	13637250	13637750	3.12687	7.87452e-07	44	20	42	1	2	2
chr4	5768250	5768750	3.12649	8.92912e-06	16	29	30	0	1	1
chr8	79566000	79566500	3.12557	3.9479e-05	21	23	12	0	0	0
chr3	42753000	42753500	3.12509	3.94911e-05	22	14	19	0	0	0
chr5	96809000	96809500	3.12509	3.94911e-05	22	14	19	0	0	0
chr2	125715500	125716000	3.12405	3.99544e-05	24	20	12	0	0	0
chr10	41565000	41565500	3.12254	7.19349e-08	37	52	34	2	3	2
chr7	19052500	19053000	3.12095	9.27465e-06	34	17	24	1	0	1
chr7	63770500	63771000	3.11639	2.31442e-05	38	14	16	0	1	0
chr13	33051250	33051750	3.11594	4.40555e-05	11	32	15	0	0	0
chr3	54480000	54480500	3.11576	1.17154e-05	41	14	23	0	0	2
chr4	9073500	9074000	3.11499	4.30664e-05	18	26	12	0	0	0
chr1	138348750	138349250	3.11415	3.64961e-07	51	23	41	1	3	2
chr10	56933750	56934250	3.11224	4.65921e-05	37	12	11	0	0	0
chr13	75421000	75421500	3.11215	4.42857e-05	21	12	22	0	0	0
chr15	52848000	52848500	3.11166	4.52232e-06	29	20	35	2	1	0
chr16	86454000	86454500	3.11137	4.45452e-05	22	12	21	0	0	0
chr1	6279500	6280000	3.10958	1.21015e-07	40	46	37	1	0	6
chr18	69919750	69920250	3.10832	2.19824e-05	22	20	21	0	0	1
chr13	52515750	52516250	3.10832	4.72445e-05	12	35	12	0	0	0
chr15	67222000	67222500	3.1064	4.55199e-05	15	20	19	0	0	0
chr2	67436500	67437000	3.10613	1.1151e-05	29	17	28	0	0	2
chr2	117749000	117749500	3.10583	6.88167e-09	40	58	53	3	1	6
chr10	17348250	17348750	3.10526	2.05587e-06	28	46	21	2	1	1
chr3	64277750	64278250	3.10424	4.66498e-05	15	17	22	0	0	0
chr5	107995750	107996250	3.10411	2.52621e-06	42	23	30	0	0	4
chr11	20896500	20897000	3.10116	2.16891e-09	51	61	48	2	7	2
chr3	84592250	84592750	3.10087	1.17904e-05	16	37	22	0	1	1
chr3	123053750	123054250	3.10069	1.0738e-05	28	23	22	0	2	0
chr2	84544500	84545000	3.10054	4.82167e-05	26	14	15	0	0	0
chr13	5892750	5893250	3.10036	1.10625e-05	32	20	22	2	0	0
chr2	113946000	113946500	3.09718	3.4448e-08	61	37	46	2	7	0
chr3	39269250	39269750	3.09564	1.15418e-05	28	26	19	0	0	2
chr7	145146500	145147000	3.09354	5.03467e-05	15	23	16	0	0	0
chr3	135429500	135430000	3.09324	7.55545e-09	58	49	44	7	2	1
chr3	79884000	79884500	3.09225	1.69985e-07	36	49	37	0	1	6
chr7	123109000	123109500	3.09209	5.19924e-05	20	26	10	0	0	0
chr11	57707750	57708250	3.09171	5.59782e-06	37	20	26	0	2	1
chr8	45524500	45525000	3.09162	5.2235e-06	34	20	28	1	1	1
chr8	45527750	45528250	3.09084	2.11708e-07	44	32	46	0	1	6
chr12	112796250	112796750	3.09069	1.45468e-05	41	14	22	0	2	0
chr5	34663250	34663750	3.0904	8.73602e-07	45	32	25	2	2	1
chr6	94405500	94406000	3.09038	2.60432e-05	26	17	20	1	0	0
chr13	34113250	34113750	3.09005	5.01956e-06	33	29	20	1	1	1
chr14	13022750	13023250	3.08969	8.02609e-06	45	12	31	0	1	2
chr8	45591500	45592000	3.0895	5.54627e-06	36	20	27	2	1	0
chr3	56706000	56706500	3.08925	1.17676e-05	28	20	24	1	1	0
chr3	81377000	81377500	3.08904	3.95094e-08	48	35	58	0	3	6
chr4	22938250	22938750	3.08888	2.21911e-06	32	32	27	0	1	3
chr12	52950750	52951250	3.08859	8.51019e-07	41	29	31	3	1	1
chr11	9519500	9520000	3.08823	1.35066e-05	29	14	31	1	1	0
chr2	67434000	67434500	3.08706	5.32087e-05	24	14	16	0	0	0
chr8	68171000	68171500	3.08689	2.89742e-05	13	35	18	1	0	0
chr7	133848750	133849250	3.08687	2.21911e-06	32	35	25	3	1	0
chr6	108537000	108537500	3.086	1.17277e-07	38	46	35	1	3	3
chr6	94795750	94796250	3.08592	6.27009e-06	28	37	19	0	0	3
chr13	81358750	81359250	3.08499	1.97594e-12	63	95	77	5	7	7
chr15	59760000	59760500	3.08498	4.98731e-14	87	81	94	7	6	9
chr7	133850000	133850500	3.08353	5.42065e-05	16	17	20	0	0	0
chr13	94730750	94731250	3.08261	1.37738e-05	34	17	23	2	0	0
chr1	160877000	160877500	3.08235	1.12703e-07	41	40	37	2	2	3
chr18	34508000	34508500	3.08184	1.37939e-05	30	17	26	0	2	0
chr2	16983000	16983500	3.07979	2.8356e-05	20	23	19	0	1	0
chr3	131803500	131804000	3.07824	5.77752e-05	28	14	13	0	0	0
chr7	63770250	63770750	3.07717	5.88597e-05	29	17	10	0	0	0
chr5	32434500	32435000	3.07623	1.38291e-05	32	20	20	0	1	1
chr13	101541000	101541500	3.07455	1.23784e-06	22	43	36	1	2	2
chr17	37061750	37062250	3.07424	7.26024e-06	40	23	21	0	3	0
chrX	64081500	64082000	3.07209	1.682e-05	26	14	34	0	2	0
chr2	108686000	108686500	3.07169	2.38876e-07	59	32	31	4	1	2
chr9	78634000	78634500	3.07147	6.24425e-06	26	26	28	0	1	2
chr15	62321000	62321500	3.07135	2.7694e-06	37	29	25	1	3	0
chr14	62992250	62992750	3.06856	8.61363e-08	40	52	37	0	2	6
chr13	49444500	49445000	3.06794	9.87991e-09	53	46	47	3	1	6
chr17	65648750	65649250	3.06477	6.36559e-05	15	26	13	0	0	0
chr15	84523000	84523500	3.06412	7.08766e-07	51	26	34	0	2	4
chr4	9073750	9074250	3.06389	1.59176e-05	22	35	16	1	1	0
chr6	20037500	20038000	3.06161	7.45014e-06	30	23	28	0	3	0
chr12	111186250	111186750	3.06047	7.26419e-06	26	26	29	3	0	0
chr8	7908750	7909250	3.0591	8.37699e-10	65	46	63	6	4	3
chr6	108536750	108537250	3.05878	1.27031e-06	33	32	33	0	2	3
chr9	123308500	123309000	3.05784	6.99869e-05	8	32	17	0	0	0
chr6	35542750	35543250	3.05714	6.64e-05	16	17	19	0	0	0
chr2	92727500	92728000	3.05677	6.73006e-05	24	14	15	0	0	0
chr4	147997500	147998000	3.05539	5.86148e-06	50	14	32	0	1	3
chr15	59823000	59823500	3.0542	2.01427e-07	45	29	57	2	6	0
chr4	57560000	57560500	3.05199	2.14768e-08	37	66	45	3	6	1
chr13	94731250	94731750	3.05117	2.14626e-07	41	32	43	2	3	2
chr12	112797500	112798000	3.05088	2.23977e-07	42	49	27	2	3	2
chr7	89611000	89611500	3.05009	3.7562e-05	25	23	14	1	0	0
chr4	57798750	57799250	3.04933	1.8407e-09	53	52	57	2	6	4
chr16	22133500	22134000	3.0492	7.06439e-05	17	20	15	0	0	0
chr6	140621500	140622000	3.04881	8.31071e-06	22	32	27	3	0	0
chr2	149931750	149932250	3.04711	1.69086e-06	33	29	36	0	1	4
chr10	24581000	24581500	3.04626	2.24164e-05	38	12	25	2	0	0
chr2	49609500	49610000	3.0461	3.43825e-06	29	32	27	0	2	2
chr2	93882000	93882500	3.04589	7.36489e-05	11	23	19	0	0	0
chr13	34715500	34716000	3.04506	1.69712e-06	37	37	25	1	0	4
chr7	67803500	67804000	3.04481	1.37322e-07	54	43	31	1	1	6
chr3	54727750	54728250	3.0434	4.01807e-05	17	29	16	1	0	0
chr18	35299500	35300000	3.04297	3.66185e-06	30	26	32	2	0	2
chr7	89559000	89559500	3.0423	8.29991e-06	30	23	26	1	2	0
chr17	75256000	75256500	3.04139	1.24411e-09	74	55	44	2	5	6
chr8	24973750	24974250	3.04117	4.16883e-05	29	14	19	1	0	0
chr7	63774000	63774500	3.04099	4.29355e-05	25	12	25	0	1	0
chr1	127837000	127837500	3.0405	8.13415e-06	24	26	28	1	1	1
chr1	150251250	150251750	3.04046	7.71534e-05	18	26	10	0	0	0
chr17	8552750	8553250	3.03995	1.10073e-05	24	43	17	0	3	0
chr9	37808750	37809250	3.03976	4.40555e-05	11	29	23	0	1	0
chr6	59303250	59303750	3.03942	3.22549e-05	48	6	29	2	0	0
chr11	42904750	42905250	3.03752	7.82129e-05	20	12	20	0	0	0
chr2	117748000	117748500	3.03675	1.99265e-05	26	20	24	2	0	0
chr13	91311250	91311750	3.03656	9.28496e-07	36	29	44	5	1	0
chr12	111186750	111187250	3.03628	2.271e-07	49	32	49	7	1	0
chr4	57559750	57560250	3.03607	1.8371e-06	25	37	36	2	3	0
chr14	18204500	18205000	3.03456	4.53219e-05	28	12	22	0	1	0
chr5	96804750	96805250	3.03194	4.14041e-08	51	46	37	4	4	1
chr2	67438250	67438750	3.03109	2.13769e-05	20	29	21	0	2	0
chr17	5822250	5822750	3.03023	3.75047e-07	48	32	37	2	5	0
chr5	96805000	96805500	3.03017	1.73522e-07	58	35	35	5	3	0
chr2	122735500	122736000	3.02993	1.0305e-05	34	29	17	0	1	2
chr12	99917750	99918250	3.02892	3.39318e-07	36	46	34	0	5	2
chr4	99981250	99981750	3.02887	8.28863e-05	20	20	12	0	0	0
chr11	59486000	59486500	3.02819	5.62759e-06	44	32	16	2	0	2
chr11	120693500	120694000	3.02793	2.42218e-07	61	37	31	0	6	2
chr4	98401500	98402000	3.0256	1.43365e-05	40	12	31	0	1	2
chrX	20379250	20379750	3.02551	4.8751e-05	18	14	29	0	1	0
chr8	7904500	7905000	3.02497	8.60252e-05	24	14	14	0	0	0
chr4	121020250	121020750	3.02464	4.6284e-05	16	23	21	1	0	0
chr16	45930500	45931000	3.02461	4.99674e-06	24	26	38	2	2	0
chr9	49922000	49922500	3.02427	8.59146e-05	18	14	19	0	0	0
chr7	133175000	133175500	3.02333	8.98802e-05	32	12	11	0	0	0
chr17	8552500	8553000	3.02321	5.39705e-06	22	43	25	1	3	0
chr13	5892500	5893000	3.02309	4.89895e-06	34	23	31	3	0	1
chr6	146675000	146675500	3.02182	4.45135e-10	53	63	61	3	5	6
chr11	9520000	9520500	3.0213	3.42649e-06	54	23	25	0	4	1
chr12	88953000	88953500	3.02052	5.11826e-06	37	29	22	0	1	3
chr17	75256250	75256750	3.02043	3.6009e-07	50	35	30	1	3	3
chrX	64088000	64088500	3.02019	2.44054e-05	29	17	24	2	0	0
chr6	47203750	47204250	3.01999	9.11999e-05	30	12	12	0	0	0
chr3	146307750	146308250	3.01961	4.85979e-05	22	23	15	0	0	1
chr13	33050750	33051250	3.01959	1.2663e-05	22	23	34	0	0	3
chr16	31598500	31599000	3.01948	2.34374e-05	21	23	25	2	0	0
chr14	64369000	64369500	3.01917	5.0308e-07	34	32	49	0	3	4
chr10	24457500	24458000	3.01876	5.42106e-05	18	37	10	0	1	0
chr1	153350500	153351000	3.01851	9.05233e-05	11	23	18	0	0	0
chr17	64744000	64744500	3.01778	9.22146e-05	15	29	10	0	0	0
chr2	110721500	110722000	3.01753	8.98914e-05	20	17	14	0	0	0
chr7	84333000	84333500	3.01548	8.86873e-07	37	29	38	1	2	3
chr9	49923500	49924000	3.01356	1.11686e-05	22	32	24	2	1	0
chr15	34966000	34966500	3.0133	1.382e-05	32	17	31	0	3	0
chrX	64081250	64081750	3.01316	1.82461e-05	30	12	42	0	3	0
chr7	84336750	84337250	3.01295	1.12377e-08	75	35	53	2	6	4
chr6	84384000	84384500	3.01178	1.03519e-08	55	52	44	7	1	3
chr4	151123000	151123500	3.01124	2.46281e-06	36	29	31	0	4	1
chr3	93571750	93572250	3.01075	9.54487e-05	20	12	19	0	0	0
chr18	39741500	39742000	3.00882	9.72005e-05	17	12	22	0	0	0
chr7	40065250	40065750	3.00873	1.11992e-06	32	32	41	2	4	0
chr14	36527250	36527750	3.00857	2.87472e-05	22	17	30	0	0	2
chr1	150251500	150252000	3.00852	9.82568e-05	24	20	9	0	0	0
chr6	20037750	20038250	3.00847	2.9771e-05	34	14	23	0	2	0
chr3	36189250	36189750	3.00805	7.8371e-07	50	23	45	5	1	1
chr14	64369250	64369750	3.00759	2.43092e-06	25	32	38	2	2	1
chr6	94264000	94264500	3.00727	2.76578e-06	44	32	22	3	2	0
chr18	35299750	35300250	3.00685	7.49767e-06	38	20	31	0	0	4
chr4	147981250	147981750	3.00655	3.53536e-08	51	55	37	7	1	2
chr2	149863500	149864000	3.00538	1.56799e-05	22	46	15	2	1	0
chr5	33717000	33717500	3.00453	5.75497e-05	29	12	20	1	0	0
chr18	69919000	69919500	3.00435	3.49818e-05	42	12	20	0	2	0
chr17	6180250	6180750	3.00047	1.24415e-06	38	29	37	2	0	4
chr2	122719250	122719750	3.00044	2.89742e-05	29	23	17	0	2	0
chr8	57013500	57014000	3.00015	4.12587e-09	55	52	50	4	6	2
chr8	25808000	25808500	2.99969	5.84053e-05	13	26	21	1	0	0
chr14	36538500	36539000	2.99957	0.000102831	17	17	16	0	0	0
chr8	121316000	121316500	2.99603	0.000106775	12	23	16	0	0	0
chr16	87387500	87388000	2.9958	6.85603e-08	49	35	57	0	4	6
chr5	130264500	130265000	2.99573	6.33898e-05	20	12	28	0	0	1
chr15	25577000	25577500	2.99162	3.28198e-06	42	32	22	0	3	2
chr3	28196750	28197250	2.99121	3.02837e-06	24	43	28	1	2	2
chr6	43292500	43293000	2.98755	3.97122e-07	42	58	27	6	2	0
chr13	32630000	32630500	2.98743	1.53751e-05	22	23	31	1	0	2
chr18	10850750	10851250	2.98697	1.57521e-05	33	23	22	3	0	0
chr8	64540000	64540500	2.98662	2.91262e-06	34	32	28	2	3	0
chr7	123083250	123083750	2.98656	3.42089e-05	15	29	25	2	0	0
chr1	186444500	186445000	2.98612	4.06636e-06	44	20	33	3	2	0
chr13	101541250	101541750	2.98608	3.35022e-05	15	29	24	1	0	1
chr1	158892750	158893250	2.986	7.81154e-05	25	6	34	0	1	0
chr4	84205000	84205500	2.98483	6.4385e-05	21	20	17	0	0	1
chr16	31503750	31504250	2.9846	0.000117717	20	23	9	0	0	0
chr4	62203500	62204000	2.98358	0.00012007	26	9	17	0	0	0
chr5	144126500	144127000	2.98358	0.00012007	26	9	17	0	0	0
chr4	106597000	106597500	2.98208	6.613e-05	16	20	22	0	1	0
chr6	124588750	124589250	2.98119	0.000119342	12	20	18	0	0	0
chr15	84523250	84523750	2.98095	3.29369e-07	71	32	33	0	3	6
chr13	13638500	13639000	2.98005	1.75334e-05	30	20	27	0	3	0
chr13	118789000	118789500	2.97956	4.0189e-05	13	23	34	2	0	0
chr4	84204750	84205250	2.97904	1.67971e-05	28	32	17	1	0	2
chr13	103977750	103978250	2.978	7.12647e-07	44	37	31	2	0	5
chr13	108713750	108714250	2.97785	0.000123015	21	20	10	0	0	0
chr19	17263250	17263750	2.9768	1.10625e-05	40	14	35	2	2	0
chr6	84383750	84384250	2.97659	9.63968e-07	51	37	28	6	1	0
chr16	45929750	45930250	2.97658	0.000126102	20	9	22	0	0	0
chr6	94744750	94745250	2.97643	2.00705e-05	26	37	16	0	0	3
chr9	88371000	88371500	2.97622	1.66477e-05	22	26	27	0	1	2
chr17	75255500	75256000	2.97497	2.47499e-08	55	40	51	1	4	6
chr14	65900250	65900750	2.97484	9.44506e-08	50	43	35	3	2	4
chr17	63712750	63713250	2.97459	0.000128	22	9	20	0	0	0
chr11	86591750	86592250	2.9745	3.53717e-05	24	23	20	2	0	0
chr10	69644750	69645250	2.97253	9.07543e-08	46	43	38	2	3	4
chr11	94916750	94917250	2.97066	0.000130959	26	12	13	0	0	0
chr8	24975750	24976250	2.97024	2.18913e-09	86	43	56	2	7	6
chr1	186568250	186568750	2.96932	6.19004e-12	83	72	69	4	7	9
chr2	49609250	49609750	2.96922	3.71015e-05	20	26	20	0	1	1
chr6	94263750	94264250	2.96827	0.000137097	30	17	7	0	0	0
chr11	57707500	57708000	2.96734	3.47079e-06	36	29	27	2	1	2
chr18	67945500	67946000	2.96674	0.000137177	28	9	15	0	0	0
chr18	75489000	75489500	2.96647	6.96925e-12	86	66	72	7	7	6
chr2	108678250	108678750	2.96524	0.000136644	11	26	14	0	0	0
chr12	104262750	104263250	2.96495	3.30236e-07	29	46	44	3	3	2
chr12	70116750	70117250	2.96451	7.76378e-05	25	14	19	0	1	0
chr13	54171750	54172250	2.96415	8.48373e-05	13	14	33	0	1	0
chr4	147981750	147982250	2.96323	1.45913e-08	69	49	39	7	3	2
chr1	118369500	118370000	2.96141	1.4017e-05	30	14	44	2	0	2
chr13	34696750	34697250	2.96083	8.17151e-05	28	12	19	1	0	0
chr4	111598500	111599000	2.96018	2.12467e-05	33	17	26	2	0	1
chr18	3871750	3872250	2.95994	7.77867e-05	18	20	19	1	0	0
chr3	65300250	65300750	2.95953	8.33128e-05	24	26	10	0	1	0
chr4	147981500	147982000	2.9594	2.42839e-09	69	63	42	8	4	2
chr13	33029750	33030250	2.95891	0.0001515	36	6	14	0	0	0
chr16	31979250	31979750	2.95805	8.32947e-05	29	17	13	0	1	0
chr10	5110500	5111000	2.95779	2.45733e-06	26	49	29	2	4	0
chr3	105059750	105060250	2.95717	8.45573e-08	32	61	45	5	3	2
chr11	86649750	86650250	2.95704	5.36655e-05	44	12	16	0	1	1
chr13	110914000	110914500	2.95616	0.000148823	29	9	14	0	0	0
chr1	186568000	186568500	2.956	1.03352e-09	75	55	50	2	7	6
chr13	13638000	13638500	2.95521	6.24403e-06	37	20	37	0	1	4
chr2	168058250	168058750	2.95506	5.00102e-05	15	40	16	2	0	0
chr18	69984500	69985000	2.9548	4.05532e-07	50	26	56	5	4	0
chr18	67194750	67195250	2.95425	0.000149773	26	9	16	0	0	0
chr10	27117250	27117750	2.95307	6.89785e-06	42	17	36	0	2	3
chr10	24459500	24460000	2.95212	0.000149224	20	20	10	0	0	0
chr11	86587750	86588250	2.95164	1.66809e-09	67	55	48	6	5	3
chr7	133848500	133849000	2.95155	2.35891e-06	33	46	24	3	3	0
chr15	59758500	59759000	2.95112	2.11732e-06	41	29	31	4	1	1
chr2	67434250	67434750	2.9503	8.95576e-05	26	12	20	0	0	1
chr3	28196500	28197000	2.95029	4.66708e-05	24	17	25	0	2	0
chr13	32630250	32630750	2.95028	4.89743e-06	38	26	28	2	0	3
chr5	151069000	151069500	2.95002	1.0133e-08	78	40	46	4	4	5
chr9	57601250	57601750	2.94988	2.05604e-05	25	26	23	2	1	0
chr5	119887250	119887750	2.94855	9.30739e-05	33	14	13	0	1	0
chr7	142906500	142907000	2.94685	0.000159957	11	32	10	0	0	0
chr16	8796250	8796750	2.94465	0.000158123	17	23	10	0	0	0
chr4	57808750	57809250	2.94308	5.71948e-06	36	35	22	0	4	1
chr11	33122500	33123000	2.94304	0.00016154	16	26	9	0	0	0
chr14	18773750	18774250	2.94233	8.04712e-08	38	52	44	2	2	6
chr7	67803250	67803750	2.94214	1.74e-07	54	61	25	1	3	6
chr11	29657250	29657750	2.94126	1.49324e-06	50	35	26	0	2	5
chr8	7892500	7893000	2.94096	4.72445e-05	20	26	19	1	1	0
chr6	115292500	115293000	2.9397	5.29786e-05	29	14	24	2	0	0
chr13	101524000	101524500	2.93864	0.000163711	16	14	18	0	0	0
chr16	53956750	53957250	2.93856	0.000171709	21	6	25	0	0	0
chr15	83156750	83157250	2.93679	2.41555e-07	57	35	35	5	2	2
chr18	39741750	39742250	2.93667	0.000165899	18	14	16	0	0	0
chr9	22089500	22090000	2.93641	5.36793e-05	34	17	16	1	1	0
chr5	151068750	151069250	2.93627	2.9425e-05	34	14	28	1	2	0
chr2	108677750	108678250	2.93569	9.59587e-05	21	17	18	0	0	1
chr2	45587750	45588250	2.93515	1.5559e-05	16	29	40	2	2	0
chr4	124643500	124644000	2.93488	6.99858e-07	30	37	50	1	2	5
chrX	140202250	140202750	2.93361	0.000102344	16	14	27	0	1	0
chr13	5892250	5892750	2.93356	1.37397e-06	36	32	40	2	0	5
chr5	76893250	76893750	2.93316	9.96644e-05	24	20	13	0	0	1
chr6	94795000	94795500	2.93178	0.000100503	15	26	16	0	1	0
chr7	95853000	95853500	2.93076	0.000112787	32	23	7	0	1	0
chr11	117843500	117844000	2.93062	5.55094e-05	26	17	22	0	0	2
chr5	91144750	91145250	2.93036	2.69892e-05	29	20	24	0	1	2
chr14	106012000	106012500	2.92979	2.41928e-09	66	49	72	0	7	9
chr2	168621250	168621750	2.92957	0.000101777	15	26	16	1	0	0
chr16	24656750	24657250	2.92893	0.000105187	16	29	13	0	1	0
chr11	86650250	86650750	2.92806	2.88765e-05	34	20	20	0	1	2
chr11	25961250	25961750	2.92797	0.000177047	12	17	19	0	0	0
chr2	117746250	117746750	2.92749	0.000178064	16	12	20	0	0	0
chr2	108622250	108622750	2.92735	0.000106494	25	12	20	0	1	0
chr13	108603750	108604250	2.92724	1.40722e-05	29	29	25	0	4	0
chr12	70117000	70117500	2.92709	6.37745e-05	38	14	17	2	0	0
chr15	59822750	59823250	2.92699	5.43865e-08	46	52	45	4	7	0
chr2	131722000	131722500	2.926	3.03177e-05	33	23	19	0	3	0
chr16	92696500	92697000	2.92588	0.000182158	26	14	10	0	0	0
chr8	24982250	24982750	2.92586	6.18981e-05	33	14	20	0	2	0
chr13	34113000	34113500	2.92565	2.8637e-06	36	29	33	1	1	4
chr1	6280500	6281000	2.92559	6.64394e-08	55	32	55	3	4	4
chr2	157373500	157374000	2.92547	1.76326e-08	54	58	38	3	3	6
chr10	60818750	60819250	2.92546	6.17852e-06	30	35	25	0	2	3
chr3	93572000	93572500	2.92507	0.000107669	25	12	20	1	0	0
chr7	24387000	24387500	2.92507	1.73507e-06	63	23	37	2	0	6
chr7	31012750	31013250	2.9249	1.77062e-05	22	46	18	0	1	3
chr10	15058750	15059250	2.92476	0.000182384	24	12	13	0	0	0
chr9	9095000	9095500	2.92447	0.000185397	11	29	11	0	0	0
chr10	24985000	24985500	2.92393	1.6022e-05	34	23	26	0	0	4
chr14	45851250	45851750	2.92393	1.38068e-05	37	12	49	2	3	0
chr7	35745250	35745750	2.92391	0.000185119	18	9	22	0	0	0
chr10	75242000	75242500	2.92325	5.60788e-05	24	26	15	1	1	0
chr2	94046250	94046750	2.92318	7.85001e-06	36	20	35	0	2	3
chr3	135298500	135299000	2.92247	0.000183078	15	20	13	0	0	0
chr1	160878750	160879250	2.92247	0.000183078	15	20	13	0	0	0
chr5	8120000	8120500	2.92188	2.82044e-05	24	20	28	1	1	1
chr17	75259000	75259500	2.92184	5.68577e-05	18	26	20	0	1	1
chr4	57808500	57809000	2.92168	1.38851e-05	29	32	21	0	3	1
chr6	51164000	51164500	2.92158	0.000116032	11	32	16	0	1	0
chr6	94742750	94743250	2.92137	0.000188183	17	9	23	0	0	0
chr2	167399250	167399750	2.92039	9.55584e-06	41	23	29	0	0	5
chr3	54480500	54481000	2.92039	3.45295e-06	32	37	30	1	0	5
chr17	9865500	9866000	2.91944	3.54957e-08	45	49	45	3	4	4
chr1	91248250	91248750	2.91923	4.05157e-07	51	37	38	0	7	2
chr16	31598000	31598500	2.91903	3.17853e-05	33	23	19	3	0	0
chr11	86622500	86623000	2.91861	6.63725e-05	30	12	25	2	0	0
chr3	92490250	92490750	2.91768	6.48658e-05	16	32	18	0	0	2
chr13	109214250	109214750	2.9173	2.90801e-05	28	26	19	2	1	0
chr13	52515500	52516000	2.91714	0.000189498	16	20	12	0	0	0
chr12	85381750	85382250	2.91686	0.000113866	24	14	18	0	1	0
chr6	115493750	115494250	2.91678	3.317e-05	22	17	34	1	1	1
chr11	20878500	20879000	2.91577	1.71164e-05	36	32	16	0	3	1
chr13	52516250	52516750	2.91483	3.14813e-05	20	32	21	0	2	1
chr8	45591750	45592250	2.91456	1.39089e-05	28	23	29	1	2	1
chr13	34715750	34716250	2.91452	1.50762e-05	34	29	19	2	0	2
chr12	52950500	52951000	2.91416	8.30931e-06	41	23	28	4	1	0
chr14	45851000	45851500	2.9137	1.12136e-10	73	58	78	9	7	3
chr17	24034750	24035250	2.91267	0.000198976	25	12	12	0	0	0
chr18	61704750	61705250	2.91258	8.78792e-06	37	40	16	1	3	1
chr10	56935250	56935750	2.91172	9.96609e-06	45	29	19	0	1	4
chr18	3872000	3872500	2.91142	0.000117143	20	17	18	0	0	1
chr14	45850000	45850500	2.91138	3.42425e-05	22	23	28	0	3	0
chr11	72847000	72847500	2.91131	0.000122547	20	12	24	0	0	1
chr16	15651000	15651500	2.91107	6.17612e-05	22	20	21	0	1	1
chr10	75241750	75242250	2.91094	0.000117216	18	17	20	0	1	0
chr4	148002000	148002500	2.9089	3.384e-05	26	26	21	0	3	0
chr4	119989500	119990000	2.90828	6.80272e-05	17	32	17	2	0	0
chr12	35418750	35419250	2.90771	0.000203089	15	14	18	0	0	0
chr13	94190750	94191250	2.90753	7.86633e-05	16	40	13	0	0	2
chr2	125716750	125717250	2.90591	7.26072e-05	22	14	29	0	2	0
chr11	86593500	86594000	2.90588	4.36009e-06	41	23	35	3	3	0
chr11	87308250	87308750	2.90547	4.2974e-05	32	12	31	1	0	2
chr13	33002250	33002750	2.90467	0.00012755	20	26	11	0	1	0
chr9	62786750	62787250	2.90455	1.55316e-06	36	32	37	4	1	2
chr2	113944750	113945250	2.90324	6.74342e-06	42	17	42	0	3	3
chr3	83844750	83845250	2.90299	3.46128e-07	41	40	42	5	4	0
chr9	49643250	49643750	2.90293	6.74008e-05	28	20	16	1	1	0
chr13	33028000	33028500	2.90261	1.01921e-05	29	37	25	0	0	5
chr8	117085750	117086250	2.90212	3.221e-07	45	35	42	4	4	1
chr13	24537250	24537750	2.90178	7.18558e-05	24	29	13	2	0	0
chr1	186567750	186568250	2.90162	2.37502e-06	44	32	32	1	6	0
chr3	90588000	90588500	2.90114	2.04156e-08	46	55	45	4	4	4
chr9	99132250	99132750	2.90095	1.84449e-05	40	23	19	2	1	1
chr13	35452500	35453000	2.9009	2.75274e-07	37	46	38	2	4	3
chr10	5110250	5110750	2.90074	7.1236e-05	17	32	16	1	1	0
chr5	55313750	55314250	2.90018	7.22356e-05	15	29	21	2	0	0
chr13	5838000	5838500	2.89994	4.10451e-05	33	14	27	2	1	0
chr3	34333750	34334250	2.89987	0.000214339	17	17	13	0	0	0
chr2	92052250	92052750	2.89901	0.000128398	22	17	16	1	0	0
chr2	132206000	132206500	2.89869	7.08769e-05	16	29	19	1	1	0
chr5	92753750	92754250	2.89843	4.56021e-05	29	12	34	2	1	0
chr14	65900500	65901000	2.89826	1.84867e-07	33	61	38	4	3	3
chr11	72848250	72848750	2.89763	3.05671e-07	46	55	33	2	0	8
chrX	71029000	71029500	2.89738	0.000219967	18	20	10	0	0	0
chr15	79051750	79052250	2.89702	2.46819e-05	37	14	33	3	0	1
chr1	91100000	91100500	2.89666	0.000221701	13	23	12	0	0	0
chr19	53543750	53544250	2.89598	0.000135391	17	26	13	0	1	0
chr9	22090250	22090750	2.89575	0.000141341	30	14	13	0	0	1
chr4	65289250	65289750	2.89427	0.000134585	21	20	14	0	1	0
chr16	22133000	22133500	2.89393	4.06107e-05	34	17	22	2	1	0
chr6	91621250	91621750	2.89378	1.42418e-07	49	49	32	3	4	3
chr6	60045500	60046000	2.89364	4.26521e-07	62	29	44	6	0	4
chr14	69911500	69912000	2.89347	0.000145654	18	32	9	1	0	0
chr3	60345750	60346250	2.89285	2.1933e-05	30	17	34	2	0	2
chr3	137959500	137960000	2.89257	4.21807e-06	37	32	28	2	4	0
chr16	53956500	53957000	2.89184	0.000147421	24	9	24	1	0	0
chr6	53498500	53499000	2.89138	0.000228729	20	14	13	0	0	0
chr7	84328500	84329000	2.88971	0.000243866	9	35	9	0	0	0
chr11	103678250	103678750	2.88959	1.2712e-06	24	75	31	3	2	4
chr15	98672750	98673250	2.8892	1.1289e-09	70	61	49	7	6	3
chr2	109242000	109242500	2.88901	1.8326e-05	28	26	25	2	0	2
chr6	60046250	60046750	2.88893	0.0002355	24	12	12	0	0	0
chr17	9863750	9864250	2.88891	2.55502e-12	79	84	74	7	10	6
chr7	7140500	7141000	2.88874	0.000145835	21	12	22	0	0	1
chr8	7908000	7908500	2.88866	1.38624e-07	46	43	39	2	4	4
chr17	9865000	9865500	2.88854	1.60463e-07	53	37	39	4	3	3
chr12	118701750	118702250	2.88745	0.000145555	22	23	11	0	1	0
chr2	92944750	92945250	2.88586	0.00023825	15	20	12	0	0	0
chr5	138708000	138708500	2.88571	5.14128e-07	44	26	63	5	3	2
chr1	192818500	192819000	2.88544	0.000245454	11	29	10	0	0	0
chr2	131721750	131722250	2.88533	5.38926e-06	45	23	29	1	2	3
chr8	123884500	123885000	2.88474	6.2097e-06	28	26	43	2	0	4
chr15	68218000	68218500	2.88469	8.0326e-05	25	26	13	1	1	0
chr4	65289500	65290000	2.88425	0.000242322	21	12	14	0	0	0
chr1	82804750	82805250	2.88322	8.21312e-05	25	17	21	0	2	0
chr2	67437000	67437500	2.88292	2.86938e-06	34	35	36	1	0	6
chr11	86587500	86588000	2.88232	3.6759e-09	69	46	55	4	6	5
chr15	59759750	59760250	2.88192	4.98731e-14	98	87	101	8	8	13
chr13	49444750	49445250	2.88155	1.00276e-06	34	46	33	5	1	2
chr5	34663000	34663500	2.88051	1.01404e-05	26	40	22	1	2	2
chr18	56684500	56685000	2.8802	0.000155288	24	12	19	0	1	0
chr6	35424500	35425000	2.88002	2.35308e-06	29	35	39	1	2	4
chr6	43292000	43292500	2.87903	5.4408e-06	26	46	25	2	1	3
chr8	46083750	46084250	2.87881	2.451e-05	30	26	24	0	0	4
chr8	122037250	122037750	2.87875	1.22286e-05	24	40	25	1	0	4
chr8	110825250	110825750	2.87854	2.08119e-05	34	23	22	2	1	1
chr4	129067250	129067750	2.87845	4.40009e-05	21	23	26	0	1	2
chr9	20367000	20367500	2.87784	1.38454e-05	36	32	22	0	0	5
chr8	22656000	22656500	2.87745	0.000252559	16	14	16	0	0	0
chr14	78065750	78066250	2.87618	0.000158208	25	17	13	0	1	0
chr3	83844500	83845000	2.87584	3.00069e-06	38	26	41	4	3	0
chr4	147984250	147984750	2.87579	4.8904e-11	65	72	73	9	5	6
chr8	11801250	11801750	2.8757	2.40921e-05	22	23	34	2	0	2
chr10	17697750	17698250	2.87563	0.000163561	18	29	10	1	0	0
chr2	27326750	27327250	2.87562	8.83775e-05	16	26	21	0	2	0
chr4	89049750	89050250	2.87499	1.16839e-05	38	23	27	3	0	2
chr13	24537000	24537500	2.87488	5.4807e-05	32	32	12	3	0	0
chr4	150705250	150705750	2.87481	8.71813e-05	18	29	16	1	0	1
chr3	103759750	103760250	2.87465	4.5753e-06	32	32	30	2	1	3
chr4	89050000	89050500	2.87406	6.21237e-05	32	9	34	1	1	1
chr1	159888750	159889250	2.87404	2.99192e-06	42	26	37	4	3	0
chr3	39269750	39270250	2.87395	0.000165899	29	14	13	0	1	0
chr3	116189750	116190250	2.87393	2.78378e-07	38	52	40	4	6	0
chrX	96121000	96121500	2.87363	2.15318e-07	51	61	29	0	6	5
chr7	63774250	63774750	2.87351	2.44054e-05	34	20	26	3	1	0
chr14	46635500	46636000	2.87351	2.44054e-05	34	20	26	3	1	0
chr8	115333500	115334000	2.87272	2.65883e-06	38	32	33	1	1	5
chr8	115333250	115333750	2.87214	2.21092e-05	25	26	27	2	0	2
chr11	86650000	86650500	2.87155	0.000210341	44	3	20	0	0	1
chr8	46430750	46431250	2.87127	5.73538e-05	32	12	29	0	2	1
chr9	57600750	57601250	2.87089	0.00017586	34	12	12	1	0	0
chr15	81175750	81176250	2.87085	0.000166306	13	26	16	0	1	0
chrX	142898500	142899000	2.87053	2.36228e-05	26	26	26	0	1	3
chr12	111188000	111188500	2.87037	0.000102947	30	26	10	0	0	2
chr8	123409500	123410000	2.87027	1.30157e-05	37	29	22	0	1	4
chrX	96121250	96121750	2.87026	8.51019e-07	50	35	37	0	7	2
chr2	113233250	113233750	2.87018	0.000266221	16	12	18	0	0	0
chrX	36096000	36096500	2.86947	1.3371e-05	21	26	40	1	2	2
chr10	33073000	33073500	2.86947	1.0968e-05	33	29	25	3	2	0
chr3	144887000	144887500	2.86942	0.000271	17	9	21	0	0	0
chr1	81987250	81987750	2.86937	0.000266221	16	17	13	0	0	0
chr19	36127750	36128250	2.86937	1.15712e-05	30	26	30	0	2	3
chr13	54171500	54172000	2.86929	0.00028794	20	3	31	0	0	0
chr2	113538250	113538750	2.86889	5.31561e-12	87	75	72	7	10	6
chr9	78634250	78634750	2.86869	0.000268488	12	17	17	0	0	0
chr4	54761000	54761500	2.86818	0.000270231	17	20	10	0	0	0
chr13	13637500	13638000	2.86781	2.76986e-06	49	23	43	0	2	6
chr15	32333500	32334000	2.86756	3.0024e-05	22	37	22	0	0	4
chr6	58779500	58780000	2.86734	5.24733e-05	20	23	28	0	3	0
chr18	58741500	58742000	2.86706	1.01119e-06	36	40	34	2	4	2
chr8	54548750	54549250	2.86704	4.89539e-07	34	43	52	0	3	7
chr6	134450250	134450750	2.86676	0.000279348	21	23	6	0	0	0
chr15	28131500	28132000	2.86668	0.000182793	15	35	9	1	0	0
chr11	59599250	59599750	2.86635	1.4431e-10	63	69	68	4	9	6
chr3	137293500	137294000	2.86603	9.35442e-05	18	23	21	0	2	0
chr11	59601250	59601750	2.86568	5.80038e-07	50	32	37	3	2	4
chr8	45529250	45529750	2.86533	3.94797e-08	57	35	72	7	5	2
chr13	33074250	33074750	2.86499	0.000180104	15	12	28	0	1	0
chrX	140202500	140203000	2.86494	9.57689e-05	22	17	23	0	2	0
chr4	147999750	148000250	2.86463	5.64788e-10	74	63	56	2	6	10
chr11	94916500	94917000	2.8644	8.15992e-05	46	9	24	0	0	3
chr14	21821250	21821750	2.86426	4.67351e-06	54	20	33	3	3	1
chr1	134274750	134275250	2.86409	0.000175183	26	17	12	0	1	0
chr15	28132000	28132500	2.86407	0.000106086	18	14	32	2	0	0
chr7	12787250	12787750	2.86367	0.000217113	33	3	28	0	0	1
chr12	17220250	17220750	2.86276	0.000177671	22	12	20	0	0	1
chr3	123054000	123054500	2.86261	9.89e-05	20	17	25	0	2	0
chr7	35349000	35349500	2.85979	2.00005e-06	36	49	28	0	2	6
chr6	94795250	94795750	2.85973	1.39403e-05	33	32	22	0	1	4
chr13	50100250	50100750	2.85945	2.50812e-05	30	26	22	2	2	0
chr15	28133250	28133750	2.85899	1.25039e-09	67	61	57	10	2	5
chr17	46933250	46933750	2.85882	5.56918e-05	26	32	14	2	0	1
chr3	93311250	93311750	2.85875	3.29162e-05	38	17	25	0	1	3
chr6	108528000	108528500	2.85826	2.19588e-06	28	49	36	2	0	6
chr10	18996250	18996750	2.85744	0.000289396	20	12	14	0	0	0
chr13	91312750	91313250	2.85742	0.000187301	17	12	25	0	0	1
chr5	96513500	96514000	2.85704	0.00010248	17	20	25	2	0	0
chr13	91313000	91313500	2.85668	2.70463e-05	29	23	26	3	0	1
chr1	159889500	159890000	2.85643	9.03644e-10	61	55	66	6	5	6
chr3	81377500	81378000	2.85599	6.40336e-05	90	37	78	0	4	6
chr8	24988250	24988750	2.85566	0.000292228	13	20	13	0	0	0
chr4	134639250	134639750	2.8553	0.000293096	12	20	14	0	0	0
chr7	84334750	84335250	2.85458	2.94783e-06	33	29	39	3	2	2
chr15	59760750	59761250	2.85437	1.35001e-05	26	35	25	2	0	3
chr5	8082750	8083250	2.85432	0.000104398	16	23	23	2	0	0
chr9	47590250	47590750	2.85389	0.000186969	22	20	12	0	0	1
chr3	98383750	98384250	2.8538	3.30236e-07	53	37	37	5	1	4
chr17	9863500	9864000	2.85362	6.1275e-11	67	69	70	7	7	6
chr15	62484500	62485000	2.85303	6.70391e-05	32	12	28	0	2	1
chr7	133174750	133175250	2.85268	0.000185119	20	17	16	0	1	0
chr7	116524250	116524750	2.85249	5.34597e-06	34	20	50	2	2	3
chr15	83157250	83157750	2.85231	2.45444e-07	46	40	39	4	2	4
chr10	24457750	24458250	2.85196	0.000109887	22	29	12	0	1	1
chr2	36167250	36167750	2.85178	0.000186969	15	20	18	0	1	0
chr2	149932250	149932750	2.85147	2.99175e-06	41	29	31	2	2	3
chr1	88600500	88601000	2.85146	0.00019116	18	26	11	1	0	0
chr10	79777750	79778250	2.85123	7.36821e-06	26	40	29	4	0	2
chr2	49929750	49930250	2.85118	0.000191262	24	12	18	1	0	0
chr19	36127500	36128000	2.85117	3.38511e-06	33	32	37	3	4	0
chr3	144976000	144976500	2.85101	0.000107943	28	20	14	0	1	1
chr15	87659750	87660250	2.85058	6.86231e-06	33	29	31	0	3	3
chr7	133175250	133175750	2.85056	0.000132402	40	9	18	1	0	1
chr17	9864750	9865250	2.84983	1.97846e-09	53	69	52	6	5	5
chr17	5821750	5822250	2.84979	4.10556e-06	44	37	24	5	2	0
chr1	31156500	31157000	2.84869	7.11444e-05	33	14	25	0	0	3
chr1	40847500	40848000	2.84856	3.82375e-06	41	23	38	3	2	2
chr6	120469500	120470000	2.84794	0.000198185	25	12	17	0	1	0
chr18	69984250	69984750	2.84785	1.98715e-05	32	17	39	2	3	0
chr13	34697250	34697750	2.84742	0.000193163	20	14	19	1	0	0
chr18	56683000	56683500	2.84717	4.01072e-08	38	66	47	4	3	6
chr12	104263000	104263500	2.84647	8.36227e-07	33	52	34	3	5	1
chr4	58736250	58736750	2.84568	0.000312916	15	14	16	0	0	0
chr5	105804500	105805000	2.84568	0.000312916	15	14	16	0	0	0
chr15	6540000	6540500	2.84526	0.000213105	16	32	9	0	0	1
chr18	71890500	71891000	2.84462	0.000144371	20	9	37	0	2	0
chr14	65902000	65902500	2.84415	0.000112787	20	26	16	2	0	0
chr17	65648500	65649000	2.84386	0.000117449	25	23	14	0	0	2
chr12	88953250	88953750	2.84351	6.80767e-05	28	14	28	0	1	2
chr2	173261000	173261500	2.84308	1.54058e-05	28	32	26	4	0	1
chr2	132340250	132340750	2.84298	0.000122202	25	26	12	0	0	2
chr6	94405250	94405750	2.84277	0.000321207	21	14	11	0	0	0
chr5	125232250	125232750	2.84232	0.000116129	22	17	22	0	2	0
chr10	115758750	115759250	2.84227	0.000211171	13	29	13	0	0	1
chr2	107393000	107393500	2.84224	0.000202702	22	17	14	0	0	1
chr10	50611750	50612250	2.84222	0.000324757	18	9	19	0	0	0
chr19	37842500	37843000	2.84138	0.000342721	15	35	4	0	0	0
chr2	166301250	166301750	2.84134	7.3811e-06	30	35	28	3	0	3
chr13	52175250	52175750	2.84039	3.71544e-05	30	23	25	0	0	4
chr13	35452750	35453250	2.84015	6.37602e-08	49	49	42	2	4	6
chr11	86622250	86622750	2.84008	2.9425e-05	28	23	25	2	1	1
chr9	49923750	49924250	2.83992	1.48722e-07	53	43	37	5	2	4
chr7	89559500	89560000	2.83991	1.88364e-07	42	43	48	2	7	2
chr6	53498000	53498500	2.83978	0.000115171	22	20	19	2	0	0
chr17	35759000	35759500	2.83971	1.15239e-06	51	26	41	2	3	4
chr9	118532750	118533250	2.83948	0.000327167	16	12	17	0	0	0
chr7	84333250	84333750	2.83894	2.28948e-05	40	14	34	2	1	2
chr17	11385500	11386000	2.8387	0.000119428	25	14	22	1	1	0
chr8	118150000	118150500	2.83838	4.8111e-06	26	40	36	2	0	5
chr13	110923250	110923750	2.83773	0.000342849	18	6	24	0	0	0
chr8	64540250	64540750	2.83712	6.55654e-05	25	17	27	2	1	0
chr19	17263000	17263500	2.83712	6.55654e-05	25	17	27	2	1	0
chr2	140100250	140100750	2.83705	1.69559e-05	45	9	59	2	3	2
chr8	64522750	64523250	2.83626	0.000343805	12	29	8	0	0	0
chr15	36381250	36381750	2.83621	6.37671e-05	30	23	16	1	1	1
chr5	107996000	107996500	2.83596	1.37162e-06	54	32	33	0	5	4
chr9	117717500	117718000	2.83575	0.000130976	29	14	19	0	0	2
chr8	24990500	24991000	2.83543	8.02609e-06	29	32	31	0	3	3
chr3	98383500	98384000	2.83504	1.40313e-07	45	43	43	3	3	5
chr3	84588750	84589250	2.83474	0.000211998	20	20	13	1	0	0
chr14	60427500	60428000	2.83474	0.000211998	20	20	13	1	0	0
chr5	33720750	33721250	2.83446	8.80825e-06	41	23	29	2	1	3
chr14	121098250	121098750	2.83438	6.84624e-05	30	17	22	0	2	1
chr3	109772000	109772500	2.83385	0.000346128	25	9	13	0	0	0
chr8	49347750	49348250	2.83336	7.06305e-05	29	23	18	0	3	0
chr1	149876500	149877000	2.83314	8.1247e-09	46	58	69	2	5	9
chr11	9519750	9520250	2.8329	3.44338e-05	46	12	34	0	4	1
chr7	143018000	143018500	2.83281	0.000122282	24	23	14	1	1	0
chr6	91210250	91210750	2.83244	3.36239e-07	48	43	33	4	3	3
chr2	108687000	108687500	2.83232	0.000235905	8	23	24	0	0	1
chr10	21399250	21399750	2.83171	6.93962e-05	24	23	22	0	3	0
chr9	60407250	60407750	2.83079	0.000358314	9	32	9	0	0	0
chr4	31768250	31768750	2.82989	0.000229809	15	29	11	1	0	0
chr13	91311000	91311500	2.82946	9.37123e-06	30	35	29	5	1	0
chr6	113692500	113693000	2.82942	0.000361549	8	32	10	0	0	0
chr7	67797750	67798250	2.82901	9.16295e-06	29	40	25	4	2	0
chr3	145666500	145667000	2.82884	0.000359793	17	26	6	0	0	0
chr7	84337000	84337500	2.82871	1.45176e-08	84	43	49	2	7	7
chr3	79883750	79884250	2.82795	2.05273e-06	30	46	32	2	2	4
chr8	7908500	7909000	2.82783	6.96373e-08	55	37	57	4	7	2
chr8	45527500	45528000	2.82742	2.42945e-06	36	35	37	1	1	6
chr13	99830000	99830500	2.82728	0.000358427	22	9	15	0	0	0
chr13	51887250	51887750	2.82711	0.000141783	11	29	22	0	1	1
chr4	107816250	107816750	2.82709	6.96071e-05	29	17	22	1	1	1
chr12	111187500	111188000	2.82699	2.45241e-06	49	29	31	3	1	4
chr7	116524000	116524500	2.82643	4.97864e-05	26	14	39	2	0	2
chr2	102724500	102725000	2.82594	9.3227e-07	36	37	42	2	5	2
chr16	19946750	19947250	2.82586	0.000237584	20	26	9	1	0	0
chr9	120836750	120837250	2.82558	0.000250256	30	20	7	0	1	0
chr11	72846250	72846750	2.82552	7.05273e-05	24	26	18	0	1	2
chr6	108536500	108537000	2.8255	1.62372e-05	29	29	25	2	1	2
chr5	4767750	4768250	2.82532	0.000229405	21	20	12	1	0	0
chr13	33050250	33050750	2.82406	0.000244676	15	12	26	0	0	1
chr6	35542500	35543000	2.82355	0.000362621	17	17	11	0	0	0
chr5	91145000	91145500	2.82272	7.44497e-05	17	26	25	1	0	2
chr2	93904000	93904500	2.82264	3.37353e-05	29	52	12	3	0	2
chr18	36405500	36406000	2.82217	3.05946e-09	58	61	51	4	7	5
chr3	152813750	152814250	2.82199	0.000145555	24	26	12	0	0	2
chr9	120837000	120837500	2.8217	5.30619e-05	42	20	19	0	4	0
chr2	31026250	31026750	2.82147	0.000244715	25	12	16	0	0	1
chr1	143391250	143391750	2.82029	4.25544e-05	16	35	26	1	2	1
chr12	116182000	116182500	2.82023	0.000380269	15	26	7	0	0	0
chr8	7892750	7893250	2.82019	1.01668e-05	25	40	28	3	3	0
chr18	43389500	43390000	2.81927	2.03625e-05	26	37	22	2	3	0
chr18	34508250	34508750	2.81919	0.00024217	21	14	17	0	1	0
chr7	109633000	109633500	2.81717	7.74994e-05	26	17	25	2	1	0
chr6	94743000	94743500	2.81649	0.000152324	13	23	25	0	2	0
chr11	59486250	59486750	2.81548	2.51602e-05	36	32	18	1	0	4
chr7	84336250	84336750	2.8144	9.00568e-06	49	17	37	1	3	3
chr3	81378500	81379000	2.81423	0.000392581	11	12	22	0	0	0
chr11	59598000	59598500	2.81384	3.5608e-06	38	29	42	2	6	0
chr6	91210500	91211000	2.81339	9.1193e-08	53	46	39	5	4	3
chr3	93537250	93537750	2.813	0.00020145	45	6	18	0	1	1
chr4	5768000	5768500	2.8123	0.00015686	13	26	22	0	2	0
chr13	5837750	5838250	2.81226	1.89322e-05	42	17	38	5	1	0
chr8	45529500	45530000	2.81187	1.66089e-06	45	26	57	6	4	0
chr2	172460250	172460750	2.81165	8.10922e-05	26	26	16	1	0	2
chr1	159889000	159889500	2.8115	1.04745e-07	49	40	48	3	5	4
chr5	96805250	96805750	2.81128	2.87079e-06	44	40	25	5	2	1
chr2	92945000	92945500	2.81112	0.000157409	13	23	25	2	0	0
chr7	142905250	142905750	2.81105	0.000165899	22	32	10	2	0	0
chr10	32985000	32985500	2.81095	7.9602e-05	20	29	19	2	1	0
chr3	108881750	108882250	2.81052	4.95038e-06	38	29	31	1	3	3
chr17	78387500	78388000	2.8105	8.60179e-05	33	17	19	2	1	0
chr13	32934250	32934750	2.8088	4.86903e-05	29	32	16	0	1	3
chr7	125779000	125779500	2.80863	0.000409979	17	23	7	0	0	0
chr3	81375250	81375750	2.80841	1.272e-05	53	20	32	0	1	6
chr3	53348250	53348750	2.80828	0.000163561	21	14	25	0	0	2
chr8	109734250	109734750	2.80826	1.14017e-05	22	35	34	2	3	1
chr8	45529750	45530250	2.8082	9.31828e-07	44	29	51	5	4	1
chr6	51164250	51164750	2.80818	0.000414989	9	29	10	0	0	0
chr9	75195750	75196250	2.8074	9.20252e-05	32	14	23	1	2	0
chr8	11801500	11802000	2.80681	2.88499e-05	34	17	34	3	0	2
chr13	33090500	33091000	2.8065	0.000275812	13	29	12	0	1	0
chr4	81830750	81831250	2.80609	4.49661e-05	18	29	28	2	1	1
chr2	67437250	67437750	2.80604	2.1121e-05	28	29	25	1	1	3
chr13	32861500	32862000	2.80585	0.000188183	25	35	7	2	0	0
chr6	91210750	91211250	2.80584	2.89261e-07	55	35	40	4	4	3
chr13	5342750	5343250	2.80502	9.55407e-05	32	26	12	0	2	1
chr6	88102500	88103000	2.80495	0.000413132	17	12	15	0	0	0
chr11	72792000	72792500	2.80493	0.000414205	12	14	18	0	0	0
chr2	84544750	84545250	2.80493	2.38546e-05	37	29	18	2	1	2
chr17	9863250	9863750	2.8046	2.41042e-08	69	40	54	7	5	3
chr10	33073500	33074000	2.80395	0.000163874	17	17	26	2	0	0
chr12	65022500	65023000	2.80394	0.000423139	7	20	19	0	0	0
chr15	62482750	62483250	2.80383	0.00028665	28	9	17	0	1	0
chr15	98673250	98673750	2.80326	4.66708e-05	32	26	18	2	2	0
chr3	69200500	69201000	2.80252	0.000425001	9	14	22	0	0	0
chr11	3905250	3905750	2.80247	2.55536e-05	30	35	19	0	3	2
chr9	85595750	85596250	2.80163	0.000423801	21	14	10	0	0	0
chr2	110721750	110722250	2.80143	0.000423801	13	12	19	0	0	0
chr15	28133500	28134000	2.8014	1.05773e-07	65	35	47	6	3	4
chr11	75399000	75399500	2.80122	6.67476e-05	40	12	28	3	0	1
chr6	36540500	36541000	2.80122	0.00017199	20	14	26	0	2	0
chr1	40847750	40848250	2.8012	8.33085e-08	61	32	62	3	5	6
chr18	70601500	70602000	2.80118	5.21108e-05	34	17	25	2	0	2
chr2	49934250	49934750	2.80089	3.54208e-05	42	29	18	5	0	0
chr4	119989750	119990250	2.80066	0.000434879	11	29	8	0	0	0
chr1	106765750	106766250	2.80027	0.000276702	15	17	19	0	1	0
chr2	29459250	29459750	2.80025	9.80832e-05	33	14	22	2	1	0
chr1	166137750	166138250	2.80018	8.24537e-06	38	46	18	2	1	4
chr13	6126500	6127000	2.79994	0.000274398	16	17	18	1	0	0
chr13	110923750	110924250	2.79967	5.34655e-05	20	23	32	0	1	3
chr2	110721000	110721500	2.7996	0.000282154	24	14	14	0	1	0
chr18	43389750	43390250	2.7995	8.64786e-05	22	26	19	2	1	0
chr9	45060500	45061000	2.79943	0.000426864	15	17	12	0	0	0
chr10	18996500	18997000	2.79877	0.000430445	11	17	16	0	0	0
chr8	45530250	45530750	2.79861	0.000112523	18	17	34	0	0	3
chr7	47109750	47110250	2.79842	0.000306147	32	9	14	0	0	1
chr12	99917500	99918000	2.79784	2.78288e-05	30	23	30	0	4	1
chr2	153191500	153192000	2.79759	0.000286239	17	23	12	0	0	1
chr1	136127250	136127750	2.79732	1.37701e-06	51	43	31	2	0	8
chr3	31129500	31130000	2.79704	0.000434171	18	14	12	0	0	0
chr5	34535000	34535500	2.79622	1.45176e-08	63	58	40	6	5	4
chr6	122856000	122856500	2.79596	0.00017254	15	29	16	1	0	1
chr8	45528250	45528750	2.79558	3.16778e-08	55	52	54	0	6	9
chr6	94795500	94796000	2.79493	1.29775e-05	36	29	25	1	1	4
chr6	127971750	127972250	2.79469	2.014e-07	75	46	29	3	4	6
chr2	108685500	108686000	2.79426	0.000454943	25	6	16	0	0	0
chr1	186579750	186580250	2.79399	8.99415e-07	37	49	37	4	6	0
chr12	112798000	112798500	2.79388	7.38204e-06	37	43	20	3	1	3
chr9	75422250	75422750	2.79234	1.80293e-06	45	29	39	2	2	5
chr2	94052000	94052500	2.79206	0.000295727	21	14	16	0	0	1
chrX	142898000	142898500	2.7919	9.48775e-05	25	20	21	0	1	2
chr12	112795750	112796250	2.79188	7.65115e-07	38	49	34	1	5	4
chr12	85381500	85382000	2.79155	0.000298012	21	20	11	0	1	0
chr18	67194500	67195000	2.79138	0.000462159	28	9	10	0	0	0
chr10	127138750	127139250	2.79068	0.000315479	13	32	10	1	0	0
chr5	149353250	149353750	2.79055	5.39546e-05	22	32	21	0	3	1
chr4	88928250	88928750	2.79025	0.000176941	17	20	22	2	0	0
chr3	108880500	108881000	2.79019	7.76383e-06	25	46	28	1	4	2
chr3	97638250	97638750	2.79002	0.000464685	21	20	6	0	0	0
chr17	75255000	75255500	2.78987	7.42489e-06	32	37	29	2	0	5
chr13	32884750	32885250	2.78933	0.000300658	13	20	18	0	1	0
chr2	93881250	93881750	2.78911	6.31459e-05	22	40	16	1	3	0
chr8	11691000	11691500	2.78903	1.38558e-05	33	23	33	1	2	3
chr1	186696250	186696750	2.78847	0.000336185	15	35	7	0	0	1
chr8	117538750	117539250	2.78845	0.000129377	26	37	10	0	3	0
chr13	82039250	82039750	2.78825	0.000476508	29	6	13	0	0	0
chr8	7907500	7908000	2.78801	7.2747e-06	30	43	25	1	2	4
chr17	56222750	56223250	2.78772	0.000299738	17	20	14	1	0	0
chr8	7907750	7908250	2.7877	6.96373e-08	50	52	41	2	5	6
chr11	117256250	117256750	2.78723	3.00302e-09	62	61	51	4	8	5
chr1	186567500	186568000	2.78712	7.48091e-07	34	49	37	2	4	4
chr3	60345000	60345500	2.78682	0.000103445	24	17	25	0	1	2
chr1	150251750	150252250	2.78642	0.00031374	24	17	11	0	0	1
chr4	151123500	151124000	2.7864	3.14813e-05	30	23	29	0	1	4
chr6	88102000	88102500	2.78602	0.000188491	15	20	24	0	2	0
chr13	118789500	118790000	2.78587	0.000484972	13	6	28	0	0	0
chr13	47894250	47894750	2.78562	0.00018244	17	23	19	2	0	0
chr1	161607750	161608250	2.78509	0.000474348	22	14	9	0	0	0
chr11	86622750	86623250	2.78491	0.000196294	20	14	25	0	0	2
chr6	116105500	116106000	2.78451	0.000309877	18	20	13	0	1	0
chr2	168058500	168059000	2.78428	5.86595e-05	22	35	19	3	1	0
chr9	115934500	115935000	2.78409	0.000341431	11	35	10	0	1	0
chr6	146675250	146675750	2.78302	1.05773e-07	46	40	57	6	3	4
chr16	87387000	87387500	2.78289	0.000379298	32	3	25	0	1	0
chr4	11555250	11555750	2.78289	5.74854e-05	30	17	27	2	1	1
chrX	157644750	157645250	2.78283	0.000480758	17	9	18	0	0	0
chr2	84549750	84550250	2.78283	0.000480758	17	9	18	0	0	0
chrX	17017500	17018000	2.78281	0.000486885	24	17	6	0	0	0
chr2	115780000	115780500	2.78239	4.16792e-06	37	37	31	1	1	6
chr3	34334000	34334500	2.7817	0.000484256	12	23	10	0	0	0
chr8	54519000	54519500	2.78157	0.000481075	17	17	10	0	0	0
chr13	47894000	47894500	2.78157	0.000481075	17	17	10	0	0	0
chr4	55141250	55141750	2.78145	6.72425e-05	28	32	17	0	4	0
chr2	92945500	92946000	2.78133	0.000482585	11	20	13	0	0	0
chr1	193420000	193420500	2.78087	0.000188155	24	17	17	0	1	1
chr7	100101000	100101500	2.78081	0.000508194	25	3	22	0	0	0
chr5	112012500	112013000	2.7796	0.000124985	17	40	13	1	1	1
chr1	82831250	82831750	2.77956	6.02998e-05	26	20	28	1	3	0
chr4	31768000	31768500	2.77941	0.000355925	11	37	9	1	0	0
chr8	115333750	115334250	2.77927	3.18304e-06	33	35	35	3	2	3
chr11	59596750	59597250	2.77902	7.94008e-06	45	20	43	0	3	5
chr2	118000000	118000500	2.77842	0.00049323	17	20	8	0	0	0
chr10	24553250	24553750	2.77797	0.000254719	22	6	36	0	1	1
chr11	59913750	59914250	2.77778	8.53544e-06	37	29	32	5	2	0
chr3	98383250	98383750	2.7776	3.80638e-07	42	40	44	2	5	4
chr15	98695250	98695750	2.77739	7.87292e-05	28	40	11	0	2	2
chr9	59537250	59537750	2.77716	0.000121294	21	35	13	1	2	0
chrX	96121750	96122250	2.77711	1.42418e-07	50	37	56	3	7	3
chr12	118701500	118702000	2.77708	0.000493098	13	14	16	0	0	0
chr4	151123750	151124250	2.77681	9.00298e-06	28	35	34	2	0	5
chr2	113946250	113946750	2.77657	1.86352e-05	33	26	31	0	5	1
chr2	4260500	4261000	2.77623	2.70609e-07	55	52	30	2	6	4
chr2	108622500	108623000	2.7761	8.1102e-05	36	12	30	3	1	0
chr1	191628250	191628750	2.77489	0.000203087	24	23	12	0	1	1
chr6	43292750	43293250	2.7747	6.59873e-05	34	26	16	3	1	0
chr6	87183500	87184000	2.77461	0.000199434	25	17	16	0	1	1
chr9	14102250	14102750	2.7744	6.31979e-05	25	20	29	3	1	0
chr3	90588250	90588750	2.77423	3.22442e-05	37	26	19	2	2	1
chr18	67194000	67194500	2.77404	0.000249249	40	9	16	2	0	0
chr2	157373750	157374250	2.77304	5.53854e-06	46	35	25	0	3	5
chr11	103683000	103683500	2.77285	0.00050653	16	14	13	0	0	0
chr8	45524750	45525250	2.7723	6.89614e-05	33	17	25	3	0	1
chrX	64087250	64087750	2.77181	0.000204016	20	20	18	0	2	0
chr13	51968500	51969000	2.771	7.61997e-09	73	49	52	8	3	6
chr3	54727500	54728000	2.77085	0.00011291	21	23	21	1	0	2
chr3	84588500	84589000	2.77076	0.000212306	25	14	20	2	0	0
chr1	6279000	6279500	2.77076	0.000212306	25	14	20	2	0	0
chr8	123409250	123409750	2.77073	3.89959e-05	37	26	20	0	4	1
chr13	5836250	5836750	2.77054	0.000103691	30	9	40	0	2	2
chr8	123409750	123410250	2.77016	3.77021e-05	24	26	31	0	1	4
chr13	109243750	109244250	2.77	0.000345672	18	14	18	0	1	0
chr3	34333500	34334000	2.76997	0.00052936	24	6	16	0	0	0
chr1	86125500	86126000	2.76973	0.000124732	20	32	15	0	1	2
chr17	24035000	24035500	2.7697	0.000211171	26	17	16	2	0	0
chr6	17479000	17479500	2.76912	0.000356433	25	17	10	0	1	0
chr9	49923250	49923750	2.76871	0.000350948	12	23	16	1	0	0
chr16	8795250	8795750	2.76871	0.000350948	12	23	16	1	0	0
chr2	69289250	69289750	2.76868	0.000360461	13	29	11	1	0	0
chr17	5821500	5822000	2.76867	2.19588e-06	34	35	42	4	4	1
chr4	63316250	63316750	2.7685	7.48275e-05	15	35	26	3	1	0
chr2	35928250	35928750	2.76766	0.000348916	18	14	18	1	0	0
chr11	119134500	119135000	2.76763	7.78923e-05	24	20	31	0	4	0
chr12	80360000	80360500	2.76745	0.000543411	11	32	6	0	0	0
chr1	6280750	6281250	2.76727	1.17904e-05	41	20	37	4	2	1
chr4	119140750	119141250	2.76661	0.000385533	7	29	18	0	0	1
chr8	64542500	64543000	2.76651	0.000118439	25	20	20	1	0	2
chr18	44472250	44472750	2.76611	1.24415e-06	41	40	39	7	2	1
chr7	31012500	31013000	2.76598	8.62491e-05	22	43	13	0	2	2
chr10	40152500	40153000	2.76544	0.000127032	24	20	22	0	3	0
chr6	20037250	20037750	2.76535	0.000129056	21	20	25	0	3	0
chr17	10033750	10034250	2.7651	0.00011822	24	20	21	1	2	0
chr13	94732000	94732500	2.76455	0.000358152	20	14	16	0	1	0
chr18	43389250	43389750	2.76448	3.46294e-05	24	32	25	3	2	0
chr13	32370500	32371000	2.76408	4.03055e-05	37	14	43	0	1	5
chr1	91248500	91249000	2.76343	1.52961e-05	44	37	20	0	6	1
chr13	51969000	51969500	2.76321	2.48336e-09	78	52	59	10	4	5
chr7	84334250	84334750	2.76253	5.64587e-06	33	35	37	6	2	0
chr18	44472000	44472500	2.76199	4.09646e-05	33	23	25	0	1	4
chr7	19052750	19053250	2.76071	0.000166953	28	9	32	0	2	1
chr8	117074250	117074750	2.76035	7.1236e-05	28	26	19	0	1	3
chr2	44516500	44517000	2.7603	6.67495e-05	24	29	20	2	2	0
chr12	65022750	65023250	2.76007	0.000391302	11	14	26	0	0	1
chr5	96804000	96804500	2.75963	1.86974e-07	62	35	45	3	6	4
chr2	94051750	94052250	2.75953	0.000373184	20	17	13	0	0	1
chr12	9134250	9134750	2.75917	0.000231609	17	29	13	1	1	0
chr1	82788000	82788500	2.75858	0.000390373	13	12	26	1	0	0
chr10	70846750	70847250	2.75785	0.000272073	38	14	11	0	2	0
chr8	123884250	123884750	2.75778	7.8371e-07	50	29	47	4	3	4
chr2	132340000	132340500	2.7576	0.000388101	25	14	12	0	0	1
chrX	142026250	142026750	2.75739	0.000567368	21	17	7	0	0	0
chr14	45853500	45854000	2.75726	0.000565159	11	12	20	0	0	0
chr18	39742000	39742500	2.75685	0.000562557	18	14	11	0	0	0
chr8	88339250	88339750	2.75647	2.80733e-05	34	40	18	0	5	1
chr15	25577250	25577750	2.75634	3.41855e-08	66	46	44	4	6	5
chr15	83157000	83157500	2.75628	7.90152e-08	61	52	37	7	2	5
chr4	111595750	111596250	2.75557	2.94157e-11	67	98	69	11	8	6
chr13	32860750	32861250	2.75542	0.000147428	28	17	21	0	0	3
chr2	102724750	102725250	2.75509	1.60939e-07	36	49	55	4	4	5
chr2	35928000	35928500	2.75501	0.000130025	21	26	18	2	0	1
chr6	94405750	94406250	2.75465	0.00040495	22	9	20	0	0	1
chr2	122719500	122720000	2.75437	0.000404619	20	9	22	0	1	0
chr12	88952750	88953250	2.75432	4.73447e-05	37	26	19	0	1	4
chr9	21688000	21688500	2.75431	0.0003833	17	20	13	1	0	0
chr11	86646750	86647250	2.75329	3.29563e-08	55	55	54	0	7	9
chr9	31145000	31145500	2.75266	4.02102e-05	32	29	20	3	2	0
chr3	61441500	61442000	2.7523	8.36006e-05	29	23	22	0	4	0
chr2	118876000	118876500	2.75205	0.000149166	26	29	12	0	2	1
chr7	145146250	145146750	2.7515	0.000254719	12	26	21	2	0	0
chr7	84335000	84335500	2.75098	1.19408e-05	29	35	31	0	2	5
chr1	186576500	186577000	2.75097	4.90787e-08	59	43	54	5	8	2
chr3	105059500	105060000	2.75086	2.74286e-08	40	66	58	7	3	6
chr19	42072750	42073250	2.75074	0.000256691	26	14	18	0	0	2
chr9	79645750	79646250	2.74975	0.000590227	16	17	10	0	0	0
chr8	7904750	7905250	2.7497	0.000424217	30	14	9	0	1	0
chr11	59597000	59597500	2.7484	1.59004e-05	67	9	58	2	3	5
chr4	147980000	147980500	2.74832	2.27572e-05	34	20	33	2	2	2
chr4	151122750	151123250	2.74798	9.09908e-05	30	14	30	2	2	0
chr6	146668500	146669000	2.74769	1.08778e-06	57	35	36	7	3	1
chr13	49443750	49444250	2.74742	0.000315479	11	43	11	0	0	2
chr2	67438000	67438500	2.7472	0.000247987	20	23	14	0	1	1
chr6	86768250	86768750	2.747	0.000259604	22	23	13	0	0	2
chr9	61558750	61559250	2.74696	0.000168922	36	12	20	2	1	0
chr13	33002000	33002500	2.74645	0.000414989	18	23	10	1	0	0
chr6	122855750	122856250	2.74621	0.000273594	12	29	18	0	0	2
chr13	20469000	20469500	2.74616	2.69892e-05	41	26	22	0	4	2
chr2	101986500	101987000	2.74584	0.000159954	32	14	20	1	0	2
chr9	79638000	79638500	2.74583	0.000410674	16	17	16	0	0	1
chr12	3505250	3505750	2.74583	0.000410674	16	17	16	0	0	1
chr1	186567250	186567750	2.74502	4.62107e-07	33	58	42	2	4	6
chr16	13589750	13590250	2.74499	0.000165899	17	37	14	2	0	1
chr5	8119500	8120000	2.74486	0.000168073	33	12	22	2	0	1
chr11	32251250	32251750	2.74453	0.000297948	12	40	11	1	1	0
chr2	84545000	84545500	2.74441	2.8708e-05	38	37	16	4	1	1
chr2	108687250	108687750	2.74363	0.000619476	11	23	10	0	0	0
chr7	112297250	112297750	2.74323	0.0001515	29	17	19	1	2	0
chr18	57266250	57266750	2.74251	0.000444855	16	29	8	0	1	0
chr14	21351000	21351500	2.74209	2.54805e-05	33	35	20	0	3	3
chr10	33072750	33073250	2.74201	0.000266565	22	23	13	0	2	0
chr3	27431500	27432000	2.74197	2.699e-06	40	52	28	0	3	7
chr4	57800000	57800500	2.74183	0.000286083	26	9	24	1	1	0
chrX	57269500	57270000	2.74138	0.000424759	16	14	19	0	1	0
chr10	111127000	111127500	2.74097	4.39175e-06	33	52	28	5	4	0
chr9	70025500	70026000	2.7407	0.000277624	25	23	11	0	2	0
chr11	59913500	59914000	2.74048	4.23773e-06	42	35	35	7	2	0
chr6	146674250	146674750	2.74026	0.000626811	15	12	15	0	0	0
chr12	35247250	35247750	2.74011	0.000260897	16	20	20	0	1	1
chr1	35743500	35744000	2.7399	0.000628434	12	14	16	0	0	0
chr16	15990000	15990500	2.7399	0.000628434	12	14	16	0	0	0
chr6	115493000	115493500	2.73978	2.1637e-07	54	37	48	5	2	6
chr4	141951750	141952250	2.73976	9.00298e-06	34	49	22	0	4	4
chr8	22656250	22656750	2.73947	0.000628792	15	14	13	0	0	0
chr13	49444000	49444500	2.73934	5.34351e-05	22	37	22	1	0	4
chr19	42125750	42126250	2.7389	2.82044e-05	25	32	31	1	5	0
chr6	20038000	20038500	2.73881	0.000172825	29	12	25	1	2	0
chr16	34483000	34483500	2.7388	0.000492208	12	40	6	0	1	0
chr11	120694250	120694750	2.73863	4.12717e-05	26	26	26	2	2	1
chr8	122037500	122038000	2.73803	1.37901e-05	26	40	29	3	0	4
chr9	85595500	85596000	2.73761	0.000272607	26	14	17	1	0	1
chr15	52848500	52849000	2.73753	0.000263674	18	17	21	1	1	0
chr2	157374500	157375000	2.73743	3.81469e-05	41	35	16	0	5	1
chr8	36914250	36914750	2.73712	0.000273064	16	23	18	0	2	0
chr4	55141000	55141500	2.73678	0.000643848	17	17	9	0	0	0
chr13	5837500	5838000	2.73674	3.00424e-07	62	32	46	4	4	5
chr3	108651500	108652000	2.73663	0.000271815	15	26	16	1	0	1
chr1	83099000	83099500	2.73638	6.10658e-05	30	14	37	2	2	1
chr5	96808750	96809250	2.73554	0.000282776	21	14	22	0	2	0
chr5	55314000	55314500	2.73546	0.000167779	18	29	19	3	0	0
chr4	128957250	128957750	2.73543	7.61541e-08	44	87	37	7	5	4
chr2	113538000	113538500	2.73524	2.14626e-07	69	29	69	2	5	9
chr2	168620750	168621250	2.73505	0.000657208	8	23	13	0	0	0
chr6	88102250	88102750	2.73502	0.000279348	15	23	19	0	2	0
chr18	5820250	5820750	2.73497	3.15232e-05	28	46	16	2	2	2
chr10	40152000	40152500	2.7348	2.95749e-05	42	26	21	3	3	0
chr11	4628250	4628750	2.73478	0.000271815	21	23	13	1	1	0
chr9	21729000	21729500	2.73454	5.21108e-05	36	23	21	2	0	3
chr9	21494250	21494750	2.73444	1.77949e-06	44	37	35	3	1	6
chr3	144886750	144887250	2.73439	0.000652886	11	14	17	0	0	0
chr2	103687000	103687500	2.73379	2.6715e-05	44	14	41	2	4	1
chr15	94386250	94386750	2.73295	0.000188725	15	20	31	0	3	0
chr8	24982500	24983000	2.73285	0.000471962	26	9	16	0	1	0
chr2	29344750	29345250	2.73271	3.49569e-05	41	26	22	1	0	5
chr3	137292750	137293250	2.73237	9.09908e-05	22	26	23	0	1	3
chr6	149236750	149237250	2.73237	0.00045826	24	12	14	1	0	0
chr12	35247000	35247500	2.732	4.77405e-05	22	29	27	1	1	3
chr2	93881750	93882250	2.73197	0.000279875	17	23	17	2	0	0
chr4	9074000	9074500	2.73177	0.000281365	16	23	18	2	0	0
chr11	86623000	86623500	2.73139	9.37123e-06	34	29	39	2	0	6
chr15	83574750	83575250	2.73116	0.000490696	32	9	12	0	1	0
chr5	32314750	32315250	2.73076	0.000174504	29	14	22	2	1	0
chr11	110357250	110357750	2.73076	0.000457775	13	20	16	0	1	0
chr12	112796000	112796500	2.7298	2.39583e-07	54	52	33	2	5	6
chr2	70908500	70909000	2.72974	9.63489e-05	28	29	16	3	0	1
chr1	158892500	158893000	2.7295	1.23729e-05	32	20	51	2	3	3
chr18	70601750	70602250	2.7293	2.69919e-05	26	35	25	1	1	4
chr2	52287500	52288000	2.72908	0.000286095	22	20	15	2	0	0
chr16	15650500	15651000	2.72855	0.000472578	13	14	22	0	1	0
chr6	146668250	146668750	2.72847	0.000232634	44	9	18	1	2	0
chr13	91310750	91311250	2.7284	0.000104994	21	32	21	4	0	0
chr1	31157250	31157750	2.72837	0.000463167	13	20	16	1	0	0
chr2	132152500	132153000	2.72753	0.000694452	20	6	18	0	0	0
chr8	123409000	123409500	2.7275	0.00018497	26	26	14	0	3	0
chr18	56684750	56685250	2.7266	0.000117852	33	17	24	0	4	0
chr17	28855750	28856250	2.72622	0.000201208	13	37	17	0	1	2
chr9	43015500	43016000	2.7258	1.72904e-05	46	23	26	3	1	3
chr13	51968750	51969250	2.72571	1.63966e-10	88	69	65	13	6	5
chr17	75199000	75199500	2.72541	0.000705612	24	17	5	0	0	0
chr13	32369750	32370250	2.7252	0.000317553	22	12	23	0	0	2
chrX	95948250	95948750	2.72492	0.000487166	25	12	13	0	1	0
chr3	61441250	61441750	2.72365	0.000192776	29	23	14	0	3	0
chr16	10451750	10452250	2.72327	0.000509408	17	29	7	1	0	0
chr9	41169500	41170000	2.72316	2.99687e-05	28	26	32	2	4	0
chr8	109773000	109773500	2.72225	0.000486585	21	12	16	1	0	0
chr2	135806250	135806750	2.72171	0.000117872	18	20	34	0	3	1
chr2	102724250	102724750	2.7217	7.50086e-06	34	32	34	2	5	1
chr13	9061500	9062000	2.7213	1.27827e-05	29	35	28	3	2	2
chr9	21729250	21729750	2.72103	9.00298e-06	42	35	25	4	0	4
chr16	8796000	8796500	2.72072	0.00031791	16	17	23	0	0	2
chr5	144900500	144901000	2.72041	0.000316552	20	26	12	2	0	0
chr1	78774750	78775250	2.72028	0.00051257	22	23	7	1	0	0
chr15	67135000	67135500	2.71938	8.17914e-05	48	17	19	3	2	0
chr16	34483250	34483750	2.71865	0.000263674	20	46	7	1	0	2
chr15	85987500	85988000	2.71858	0.0007317	25	9	10	0	0	0
chr7	112306000	112306500	2.71853	0.000122965	32	26	16	0	4	0
chr9	85595000	85595500	2.71847	0.000734796	22	6	16	0	0	0
chr15	59822250	59822750	2.71847	0.000318514	21	23	13	0	2	0
chr5	96804500	96805000	2.71781	8.96108e-09	71	63	42	8	6	4
chr16	87387250	87387750	2.71749	4.30139e-06	46	26	45	0	4	6
chr12	32398000	32398500	2.71707	0.000328972	28	12	17	1	0	1
chr2	93907250	93907750	2.71707	1.42225e-06	50	46	29	7	2	2
chr8	24982000	24982500	2.71674	0.000119609	34	17	21	0	1	3
chr9	56859250	56859750	2.71616	0.000732086	15	17	10	0	0	0
chr14	21808250	21808750	2.71605	0.000188819	29	17	18	2	1	0
chr5	149338500	149339000	2.71596	7.58582e-05	42	17	22	0	3	2
chr9	31144750	31145250	2.7148	0.000109766	21	35	16	2	1	1
chr14	66225250	66225750	2.71422	0.000209973	32	17	17	3	0	0
chr4	118016000	118016500	2.7142	0.000747238	22	12	9	0	0	0
chr14	64368750	64369250	2.71387	3.32269e-06	30	37	58	0	4	7
chr3	36189500	36190000	2.71366	5.97641e-05	41	14	37	5	1	0
chr5	105804750	105805250	2.71363	0.000517742	15	14	19	0	0	1
chr3	53100750	53101250	2.7136	0.000332933	20	26	11	0	1	1
chr2	67438500	67439000	2.71335	0.000511875	15	17	16	0	1	0
chr15	98673000	98673500	2.71329	1.62901e-06	54	32	38	6	4	1
chr2	148013000	148013500	2.71309	0.000515469	16	14	18	0	1	0
chr5	105806500	105807000	2.71301	0.000328133	21	23	13	2	0	0
chr8	46429750	46430250	2.71169	5.85558e-06	30	29	48	2	4	3
chr10	53338000	53338500	2.71156	6.00631e-06	38	37	34	2	7	0
chr16	30331000	30331500	2.71155	0.000418158	37	6	20	0	2	0
chr9	30649750	30650250	2.71155	0.000351157	29	12	17	2	0	0
chr4	57805000	57805500	2.71131	1.62659e-07	67	35	51	2	6	7
chr15	62483500	62484000	2.71092	0.000151253	41	6	42	0	3	2
chr3	75499750	75500250	2.7108	0.000328005	16	17	22	1	0	1
chr4	119125000	119125500	2.71063	0.000533329	12	23	14	0	0	1
chr5	151316250	151316750	2.71027	6.09984e-07	33	52	44	5	4	3
chr3	27599500	27600000	2.70996	1.66285e-05	40	26	26	2	2	3
chr17	6179750	6180250	2.70993	7.83666e-06	32	35	32	4	3	1
chr7	123108250	123108750	2.70989	0.000348262	16	29	13	2	0	0
chr10	79778000	79778500	2.70982	1.52182e-05	26	46	33	7	1	0
chr1	6287500	6288000	2.70976	0.000142395	34	17	22	0	0	4
chr11	120950250	120950750	2.70955	2.03214e-05	40	26	27	1	1	5
chr18	56683500	56684000	2.70932	9.21249e-05	33	17	31	0	0	5
chr14	121098000	121098500	2.70929	0.000124106	25	32	15	0	1	3
chr3	56127000	56127500	2.70921	0.000544251	11	26	13	0	1	0
chr9	85595250	85595750	2.70894	0.00052849	15	14	19	1	0	0
chr1	78745250	78745750	2.70839	2.38067e-08	70	58	39	4	7	6
chr9	31120500	31121000	2.70791	5.2972e-06	53	40	27	2	8	0
chr15	41414250	41414750	2.7075	0.000257699	38	12	18	0	3	0
chr9	21494500	21495000	2.70727	2.43064e-07	50	46	39	4	3	6
chr13	13638750	13639250	2.70708	8.1102e-05	38	14	28	1	3	1
chr8	64542750	64543250	2.707	0.000196996	18	26	19	2	1	0
chr2	167386750	167387250	2.70648	1.97295e-07	73	46	37	9	4	2
chr4	106597250	106597750	2.70638	4.56021e-05	16	46	26	2	2	2
chr9	102635000	102635500	2.70592	0.000779741	13	14	14	0	0	0
chr17	79299750	79300250	2.70576	0.000789322	12	9	21	0	0	0
chr17	6179500	6180000	2.70505	2.21911e-06	37	43	33	3	2	5
chr1	93696500	93697000	2.70481	3.61909e-06	59	52	18	4	2	5
chr9	75196250	75196750	2.70471	2.87472e-05	46	26	25	6	0	1
chr9	117717250	117717750	2.70445	0.000787787	13	12	16	0	0	0
chr10	50611500	50612000	2.70445	0.000787787	13	12	16	0	0	0
chr3	65299500	65300000	2.70425	0.00079007	16	17	9	0	0	0
chr9	40767500	40768000	2.70425	0.00079007	16	17	9	0	0	0
chr5	96804250	96804750	2.7042	1.08975e-07	70	43	39	5	5	5
chr5	149373250	149373750	2.70335	2.68404e-06	40	29	54	2	7	2
chr11	51876250	51876750	2.70333	9.37609e-06	38	40	22	3	3	2
chr13	81358500	81359000	2.70308	1.21479e-10	61	92	72	11	6	8
chr4	58401750	58402250	2.703	2.145e-05	26	26	40	2	4	1
chr5	33720500	33721000	2.70197	2.05107e-05	38	35	20	2	1	4
chr2	149886500	149887000	2.70136	0.000370186	12	26	19	2	0	0
chr13	51886500	51887000	2.70083	0.000808224	12	12	17	0	0	0
chr3	60654500	60655000	2.70073	0.000837297	25	3	19	0	0	0
chr5	92753500	92754000	2.70057	0.000240283	30	12	22	0	1	2
chr8	45591250	45591750	2.70044	0.000234695	25	12	27	2	1	0
chr4	57799500	57800000	2.70009	0.000286366	29	9	29	0	0	3
chr19	10569500	10570000	2.6998	0.000215463	24	17	21	0	1	2
chr1	186012750	186013250	2.69964	0.000811825	16	12	13	0	0	0
chr10	91199250	91199750	2.69949	0.00056818	15	20	13	0	0	1
chr2	149933250	149933750	2.69949	0.00056818	15	20	13	0	0	1
chr14	78330000	78330500	2.6992	0.000364689	17	20	18	0	0	2
chr14	45850750	45851250	2.69919	4.8904e-11	75	81	75	10	12	4
chr8	64539750	64540250	2.69918	0.00011291	26	23	20	2	1	1
chr5	33716750	33717250	2.69909	0.000576461	24	12	13	1	0	0
chr5	137054250	137054750	2.69872	0.000819701	12	20	10	0	0	0
chr9	75197000	75197500	2.69862	0.000574289	20	12	16	0	1	0
chrX	10546750	10547250	2.69829	0.000587561	21	9	19	1	0	0
chr15	59759250	59759750	2.69806	9.52458e-07	58	26	54	3	6	4
chr4	81830500	81831000	2.69805	6.61173e-06	44	26	37	3	5	1
chr12	3323500	3324000	2.69769	0.000593565	22	9	18	0	1	0
chr6	58779750	58780250	2.69769	2.52117e-05	24	29	39	0	4	3
chr16	30442250	30442750	2.69751	0.000641212	28	23	4	0	1	0
chr15	28132250	28132750	2.69723	9.74792e-05	33	14	34	4	1	0
chr10	93287500	93288000	2.69704	2.32863e-05	40	37	17	3	2	2
chr17	46933000	46933500	2.69639	0.000247151	30	26	10	2	1	0
chr7	7140250	7140750	2.69603	0.000845383	15	6	22	0	0	0
chr3	61442000	61442500	2.69557	0.000391572	26	14	16	0	0	2
chr9	6454500	6455000	2.69557	0.000391572	26	14	16	0	0	2
chr2	117745500	117746000	2.69479	0.000838282	11	12	18	0	0	0
chr2	113945750	113946250	2.6943	6.50834e-08	73	37	56	3	7	7
chr3	98419750	98420250	2.69425	0.000618353	13	29	9	0	1	0
chr2	103685750	103686250	2.69408	0.000170333	30	35	10	0	3	1
chr4	58402000	58402500	2.69393	1.22555e-05	25	37	37	2	5	1
chr9	115978000	115978500	2.69391	0.000139473	28	17	25	0	3	1
chr10	70847000	70847500	2.69385	0.000160829	36	14	22	0	1	3
chr18	56790750	56791250	2.69359	6.39925e-08	40	66	51	3	6	7
chr2	20357000	20357500	2.69293	0.000845383	17	12	12	0	0	0
chr7	109619500	109620000	2.69289	0.000674907	16	37	4	1	0	0
chr8	79576000	79576500	2.69262	1.30596e-06	44	40	35	2	4	5
chr9	123296250	123296750	2.69233	7.62358e-06	30	37	39	0	3	6
chr5	74340750	74341250	2.69215	0.000233514	21	20	22	3	0	0
chr9	47575000	47575500	2.69177	0.000374372	18	23	14	1	1	0
chr4	57799750	57800250	2.69157	0.000866542	21	6	16	0	0	0
chr4	65289000	65289500	2.69155	0.000147594	34	26	12	1	2	1
chr5	92755500	92756000	2.69111	0.000855035	12	17	12	0	0	0
chr3	135429750	135430250	2.69079	5.56465e-07	49	46	41	7	0	6
chr15	88775500	88776000	2.69077	0.000865485	12	23	8	0	0	0
chr1	126658750	126659250	2.69008	0.00042364	17	32	10	2	0	0
chr15	62467500	62468000	2.68976	0.000407347	18	14	23	0	0	2
chr15	85345750	85346250	2.68972	0.000259661	26	12	25	0	1	2
chr1	45304500	45305000	2.68954	0.000614581	16	23	10	1	0	0
chr2	29459000	29459500	2.68942	0.000422468	28	9	20	1	1	0
chr3	65297000	65297500	2.68923	2.05262e-05	24	32	34	2	3	2
chr9	70196750	70197250	2.68919	0.000163874	28	32	14	4	0	0
chr4	147999500	148000000	2.68857	4.42169e-09	77	49	67	4	6	11
chr14	65907500	65908000	2.68837	0.000199126	26	12	37	4	0	0
chr9	61378000	61378500	2.6882	0.000880252	22	14	7	0	0	0
chr17	75111000	75111500	2.68817	0.000168143	38	14	20	0	2	2
chr4	32405750	32406250	2.68783	4.51745e-05	45	40	15	6	0	1
chr2	110719000	110719500	2.68776	0.000392581	16	20	19	2	0	0
chr6	40363750	40364250	2.68759	0.000102976	44	14	22	1	2	2
chr13	102672500	102673000	2.68721	0.000174306	38	12	23	2	2	0
chr1	149876000	149876500	2.68669	9.60702e-07	30	43	63	5	5	3
chr8	34753750	34754250	2.68668	0.000625631	17	20	11	0	0	1
chr2	29459500	29460000	2.68649	0.000415427	26	20	11	2	0	0
chr6	143640750	143641250	2.68594	0.00014745	28	26	16	0	1	3
chr5	86100750	86101250	2.68587	0.00045841	16	35	9	0	2	0
chr12	112797750	112798250	2.68542	5.1794e-05	29	40	17	1	1	4
chr1	138356500	138357000	2.6853	0.000146224	21	17	31	2	1	1
chr2	135052750	135053250	2.68511	8.75524e-05	30	32	17	4	0	1
chr1	6287250	6287750	2.68488	0.000172814	33	23	16	0	0	4
chr6	52825750	52826250	2.68453	0.000663589	29	14	8	1	0	0
chr7	128310000	128310500	2.6845	0.000243872	20	26	16	0	2	1
chr5	149508250	149508750	2.68434	8.97153e-05	34	32	13	2	1	2
chr11	86621500	86622000	2.68357	0.00064009	22	14	12	0	1	0
chr2	120979750	120980250	2.68353	1.34223e-05	30	37	31	0	5	3
chr4	97505750	97506250	2.68291	0.000904133	17	9	15	0	0	0
chr1	135771250	135771750	2.68287	2.8356e-05	33	37	22	0	2	5
chr1	160877500	160878000	2.68273	0.000637942	15	14	18	0	1	0
chr4	55141500	55142000	2.68246	4.95038e-06	49	35	30	0	6	4
chr1	98037000	98037500	2.68242	0.000637242	17	14	16	0	1	0
chr13	5344500	5345000	2.68222	0.00093889	18	3	25	0	0	0
chr11	86607000	86607500	2.6819	0.000906312	17	14	10	0	0	0
chr2	77237750	77238250	2.6819	0.000906312	17	14	10	0	0	0
chr6	17549000	17549500	2.68167	9.14241e-06	40	32	35	2	7	0
chr18	61805750	61806250	2.68153	4.07557e-05	29	32	22	3	1	2
chr17	56030250	56030750	2.68149	9.97931e-06	34	55	20	3	2	4
chr7	141164750	141165250	2.68095	0.000663747	25	14	10	0	1	0
chr1	57400500	57401000	2.68078	0.000668241	12	12	24	0	1	0
chr18	67749750	67750250	2.68072	0.000187033	11	32	30	3	1	0
chr18	35299250	35299750	2.67978	0.000180036	29	12	30	2	0	2
chr9	21689000	21689500	2.6797	0.000926643	22	9	11	0	0	0
chr2	132206250	132206750	2.67931	0.000652479	13	17	17	0	1	0
chr14	105109500	105110000	2.67926	0.000733262	4	26	23	0	0	1
chr8	68105250	68105750	2.67816	0.000930955	18	9	14	0	0	0
chr13	33050000	33050500	2.67816	0.000930955	18	9	14	0	0	0
chr1	166137500	166138000	2.67747	8.67155e-05	26	35	16	1	2	2
chr2	92945250	92945750	2.67742	0.00045297	11	20	25	2	0	0
chr1	78746250	78746750	2.67698	0.000663832	17	17	13	0	0	1
chr1	39307500	39308000	2.67661	5.68662e-05	21	46	19	2	2	2
chrX	19095500	19096000	2.67548	0.000950488	12	9	20	0	0	0
chr13	101018500	101019000	2.67518	0.000434805	15	23	17	2	0	0
chrX	142026000	142026500	2.67513	0.000958555	25	9	9	0	0	0
chr14	64368500	64369000	2.67464	5.42065e-05	24	20	50	0	2	5
chr15	59823250	59823750	2.67414	2.86982e-05	54	12	48	5	2	2
chr16	86516500	86517000	2.67399	0.000177985	17	20	33	3	0	1
chr9	101472000	101472500	2.67386	0.00016278	17	35	18	2	1	1
chr18	60891000	60891500	2.67361	2.41045e-05	28	32	29	2	1	4
chr3	65884750	65885250	2.67333	0.000154741	24	17	27	2	1	1
chr15	74594750	74595250	2.67311	0.000271724	22	26	14	0	2	1
chr8	45528750	45529250	2.67283	5.14697e-09	50	63	69	6	7	7
chr9	45060250	45060750	2.67272	0.000265702	22	17	22	2	0	1
chr2	118876250	118876750	2.67262	0.000448827	21	23	11	0	1	1
chr15	38594500	38595000	2.67244	1.79214e-07	70	32	63	3	5	9
chr3	61441000	61441500	2.67241	0.000977112	22	17	5	0	0	0
chr13	13637750	13638250	2.67228	1.30914e-05	51	23	33	1	2	6
chr8	45530000	45530500	2.67225	8.74456e-05	30	12	45	2	1	3
chr16	92997250	92997750	2.67195	0.000270112	20	17	24	1	2	0
chr8	68171250	68171750	2.67153	0.00010544	16	37	25	3	0	2
chr9	41170000	41170500	2.67118	2.8216e-05	37	23	30	2	4	1
chr9	79216500	79217000	2.67117	0.000300579	18	14	30	0	2	1
chr7	47110250	47110750	2.67103	0.000200301	32	12	27	1	0	3
chr10	118991000	118991500	2.67093	0.000526134	25	6	27	0	1	1
chr3	60631250	60631750	2.67085	8.18398e-05	33	14	40	2	4	0
chr1	136128500	136129000	2.67064	0.000469502	25	20	11	0	2	0
chr4	141875250	141875750	2.67047	0.000326453	15	35	15	0	0	3
chr4	13516750	13517250	2.67039	0.000268953	22	17	22	2	1	0
chr11	57708000	57708500	2.6702	0.000104994	26	35	17	0	4	1
chr17	56360250	56360750	2.67018	0.000302572	22	29	13	0	3	0
chr1	186444250	186444750	2.67008	4.37507e-05	38	17	38	4	0	3
chr7	105621750	105622250	2.67004	0.000976281	15	17	9	0	0	0
chr11	20907750	20908250	2.67004	0.000976281	15	17	9	0	0	0
chr3	56705500	56706000	2.66934	0.00049291	9	26	22	2	0	0
chr6	53498250	53498750	2.66823	0.00100241	24	6	13	0	0	0
chr11	81411750	81412250	2.66821	0.000486054	18	12	25	0	2	0
chr15	94386000	94386500	2.66789	0.000123431	15	29	34	0	4	1
chr19	36128500	36129000	2.66747	2.39796e-06	46	32	40	3	6	2
chr6	86219750	86220250	2.66741	0.000988855	12	14	14	0	0	0
chr19	31996000	31996500	2.66726	0.00010476	34	17	26	3	2	0
chr13	34111000	34111500	2.66695	0.00102348	4	29	13	0	0	0
chr12	88952250	88952750	2.6669	0.000300389	18	26	18	0	0	3
chr8	45529000	45529500	2.66679	5.09104e-09	55	55	79	7	7	7
chr1	135770750	135771250	2.66672	2.21344e-06	32	43	42	2	4	5
chr13	5837250	5837750	2.66623	3.05331e-08	83	37	66	7	5	8
chr1	134277750	134278250	2.66622	0.000319855	34	12	18	2	1	0
chr11	25901250	25901750	2.66572	0.000468225	22	20	13	2	0	0
chr8	111748000	111748500	2.66501	1.96956e-05	38	35	25	0	2	6
chr4	141953250	141953750	2.66478	0.000308205	32	14	17	2	1	0
chr3	90574250	90574750	2.66471	0.000466048	18	17	19	2	0	0
chr1	98037750	98038250	2.6647	0.000297948	13	26	23	2	1	0
chr14	65899000	65899500	2.66464	0.000721726	20	12	15	1	0	0
chr10	118573750	118574250	2.66441	0.000216839	41	14	18	3	1	0
chr7	125898750	125899250	2.66411	7.40626e-05	29	32	24	0	0	6
chr13	91313250	91313750	2.66335	0.000332249	30	14	19	0	0	3
chr1	40848250	40848750	2.66322	0.000431509	29	6	34	0	3	0
chr16	26184500	26185000	2.66278	9.61128e-05	24	23	28	2	3	0
chr9	75195250	75195750	2.66273	0.00103303	20	6	16	0	0	0
chr2	12342250	12342750	2.66273	0.00103303	20	6	16	0	0	0
chr2	108624000	108624500	2.66273	0.00103303	20	6	16	0	0	0
chr17	35749750	35750250	2.66264	9.88656e-05	33	26	17	1	3	1
chr5	113628750	113629250	2.66259	0.000478244	21	17	16	0	2	0
chr12	73813250	73813750	2.66244	0.000472557	18	23	13	1	0	1
chr2	93881500	93882000	2.66208	0.000214266	25	37	11	1	3	0
chr4	124643750	124644250	2.6618	2.66077e-07	40	49	57	3	3	9
chr11	94916250	94916750	2.66176	0.000188404	50	9	25	2	0	3
chr2	119379250	119379750	2.6613	0.000476558	20	17	17	2	0	0
chr10	17698000	17698500	2.66124	0.000774019	17	26	7	0	1	0
chr6	115493500	115494000	2.66071	1.4768e-05	36	23	46	2	1	6
chr7	125779250	125779750	2.65916	3.45545e-05	40	32	19	2	4	1
chr4	147982000	147982500	2.65912	1.19234e-06	50	35	39	5	4	3
chr10	56942750	56943250	2.65904	0.000746906	15	20	12	1	0	0
chr11	120694500	120695000	2.65894	5.24294e-07	48	46	37	6	3	4
chr13	32868750	32869250	2.65894	0.00104614	11	20	10	0	0	0
chr18	24599250	24599750	2.65894	0.00104614	11	20	10	0	0	0
chr3	93311000	93311500	2.65881	0.000779741	24	9	15	0	0	1
chr2	135051750	135052250	2.65862	2.27456e-05	38	40	22	6	0	2
chr8	54549000	54549500	2.65837	0.000228041	26	12	32	0	1	3
chr6	108535500	108536000	2.65767	0.000761688	21	14	12	0	1	0
chr13	6009750	6010250	2.65745	1.15401e-05	44	29	31	0	4	5
chr11	90196250	90196750	2.65733	0.000184789	17	23	28	2	2	0
chr13	108714000	108714500	2.65718	0.000776299	24	14	10	0	1	0
chr10	118561000	118561500	2.65706	0.000491455	21	17	16	2	0	0
chr8	121315750	121316250	2.65695	0.000777718	9	23	16	1	0	0
chr8	11205250	11205750	2.65689	0.00106522	8	23	11	0	0	0
chr13	108604000	108604500	2.65673	5.19594e-05	29	29	23	1	3	2
chr5	67643750	67644250	2.6567	0.000487166	15	20	18	1	0	1
chr9	115934250	115934750	2.65652	0.000204083	22	37	12	2	1	1
chr18	69986000	69986500	2.65636	0.000218975	21	14	34	0	2	2
chr6	127040500	127041000	2.65618	9.94001e-11	84	66	80	7	7	13
chr5	96807500	96808000	2.65603	0.00106497	20	12	9	0	0	0
chr6	17478750	17479250	2.65603	0.00106497	20	12	9	0	0	0
chr4	11555000	11555500	2.65564	0.000317129	25	14	22	2	0	1
chr3	7495750	7496250	2.65561	0.000348262	30	14	19	0	3	0
chr4	107816000	107816500	2.65537	0.000308148	16	29	16	1	1	1
chr9	115977750	115978250	2.65512	6.50782e-05	34	20	28	1	1	4
chr13	51852250	51852750	2.65511	9.79589e-05	29	20	25	2	2	1
chr9	75422000	75422500	2.65453	7.84221e-06	41	23	47	3	2	5
chr9	75195500	75196000	2.6533	0.000338134	28	12	22	2	1	0
chr3	65300000	65300500	2.6529	0.000352056	17	35	12	1	2	0
chr2	113540250	113540750	2.65215	0.000344761	25	23	14	0	0	3
chr3	84438000	84438500	2.65201	3.43554e-05	33	37	20	4	1	2
chr13	101540750	101541250	2.65195	9.54913e-08	50	52	49	2	6	8
chr11	57707250	57707750	2.65179	0.000539871	22	12	20	0	0	2
chr16	24511750	24512250	2.65178	0.000521717	15	23	16	0	2	0
chrX	64080250	64080750	2.65156	0.00109326	15	9	16	0	0	0
chr7	101474750	101475250	2.65155	7.35562e-05	40	17	26	1	2	3
chr14	106011500	106012000	2.65128	2.46961e-08	55	52	74	3	5	12
chr7	63774500	63775000	2.65083	0.000110511	30	20	25	3	2	0
chr13	108776250	108776750	2.65081	0.00113034	28	3	15	0	0	0
chr4	81832000	81832500	2.65071	0.000794657	13	17	16	0	0	1
chr13	103951000	103951500	2.65071	0.00109501	11	17	12	0	0	0
chr16	93026000	93026500	2.65071	0.00109501	11	17	12	0	0	0
chr5	146777000	146777500	2.65064	0.000552822	18	12	24	0	0	2
chr2	117475250	117475750	2.65054	7.86118e-05	36	17	30	0	3	3
chr17	17791750	17792250	2.64994	0.000803164	22	12	13	1	0	0
chr11	72792500	72793000	2.64961	0.000339502	16	26	20	3	0	0
chr5	44260250	44260750	2.64957	0.000808224	13	14	19	0	0	1
chr7	68166250	68166750	2.64895	0.00110544	12	17	11	0	0	0
chr16	36021500	36022000	2.64886	3.11068e-05	36	29	23	2	3	2
chr13	34697000	34697500	2.6487	0.000376619	36	12	16	2	1	0
chr7	109712750	109713250	2.64858	0.000560651	26	9	20	1	1	0
chr7	72510750	72511250	2.6485	0.00112188	7	23	12	0	0	0
chr1	6288250	6288750	2.6484	0.000804397	13	17	16	0	1	0
chr12	17220500	17221000	2.64827	0.000116153	32	20	23	3	0	2
chr15	59759500	59760000	2.64804	1.44856e-09	94	46	102	10	8	10
chr13	5838250	5838750	2.64802	0.000347214	21	17	23	0	3	0
chr1	153940250	153940750	2.648	0.000204127	18	35	16	2	1	1
chr16	45894500	45895000	2.64679	0.000874895	7	14	28	0	1	0
chr14	45325500	45326000	2.64673	0.000102599	13	43	30	0	3	3
chr10	118573500	118574000	2.64578	2.33039e-06	57	35	34	6	5	1
chr19	36127250	36127750	2.6452	1.85855e-05	26	35	34	4	3	1
chr2	146533000	146533500	2.64514	8.64533e-06	36	29	45	0	5	5
chr7	145108500	145109000	2.64509	0.000533639	20	20	13	0	1	1
chr11	20878750	20879250	2.64477	0.000821366	16	17	13	0	1	0
chr5	4234500	4235000	2.64456	0.00038245	29	14	19	0	0	3
chr10	56935500	56936000	2.64443	0.000376619	30	20	13	0	3	0
chr13	64212000	64212500	2.64416	0.000327909	20	23	17	2	0	1
chr6	72927000	72927500	2.64399	7.18342e-05	22	35	25	2	0	4
chr9	57602250	57602750	2.6439	0.000586039	30	12	14	2	0	0
chr3	90639000	90639500	2.64345	0.00114314	13	17	10	0	0	0
chr8	45525000	45525500	2.6434	0.000139006	29	23	25	5	0	0
chr3	54480750	54481250	2.64337	3.88304e-05	29	32	28	5	0	2
chr2	117745750	117746250	2.64323	0.00085567	16	9	22	1	0	0
chr1	151228750	151229250	2.64318	0.000142006	38	14	24	1	2	2
chr17	56360500	56361000	2.6427	0.000364689	22	26	14	0	3	0
chr10	56934500	56935000	2.64263	0.00056818	20	12	22	2	0	0
chr4	9073250	9073750	2.64251	0.00115557	13	20	8	0	0	0
chr7	78964250	78964750	2.64158	0.000370171	24	12	25	2	0	1
chr6	137783750	137784250	2.64149	0.000898983	24	6	19	0	1	0
chr5	96805750	96806250	2.64128	5.39884e-07	48	49	40	2	3	9
chr18	77055250	77055750	2.64113	0.000861202	20	20	8	1	0	0
chr8	126767000	126767500	2.6411	0.000130598	34	23	18	0	2	3
chr15	102015750	102016250	2.6406	5.09104e-09	58	72	57	11	6	4
chr18	56683250	56683750	2.64057	8.32533e-07	32	66	50	3	2	10
chr8	7733000	7733500	2.63982	0.00117259	18	9	13	0	0	0
chr10	43580250	43580750	2.63982	0.00117259	18	9	13	0	0	0
chr5	31576250	31576750	2.63976	0.000356433	15	20	25	1	2	0
chr7	66376000	66376500	2.63935	0.00117353	18	12	10	0	0	0
chr5	149340500	149341000	2.63867	0.000864236	12	14	20	1	0	0
chr17	71206000	71206500	2.63846	0.000882321	22	9	16	0	1	0
chr1	149877000	149877500	2.6367	6.52299e-05	41	20	30	0	1	6
chr9	49974000	49974500	2.6367	7.4499e-05	24	35	23	2	4	0
chr10	24985250	24985750	2.63642	0.000880282	20	12	14	0	0	1
chr1	93696250	93696750	2.63616	2.50473e-05	49	43	16	1	2	6
chr8	117074000	117074500	2.63582	0.000683031	17	35	7	0	0	2
chr17	65648250	65648750	2.63582	0.000683031	17	35	7	0	0	2
chr12	16850750	16851250	2.63573	1.45409e-07	58	46	46	4	3	9
chr7	125763750	125764250	2.6357	8.59122e-07	48	46	35	2	6	5
chr2	168621500	168622000	2.63517	0.00120343	17	14	9	0	0	0
chr7	110713500	110714000	2.63433	0.000161085	34	32	12	3	0	2
chr9	99131500	99132000	2.63393	7.42383e-05	37	23	21	2	1	3
chr10	56685500	56686000	2.63317	0.000854198	58	6	6	1	1	0
chr1	83248250	83248750	2.63258	0.000906963	18	20	9	0	1	0
chr13	63177250	63177750	2.6325	0.000380663	18	29	14	1	2	0
chr13	101523750	101524250	2.63206	0.000590067	20	17	16	2	0	0
chr7	110002750	110003250	2.63202	1.29988e-05	24	40	37	2	3	4
chr9	47590000	47590500	2.63143	4.86935e-05	36	26	26	0	2	5
chr8	8274500	8275000	2.63137	0.000371859	17	20	22	0	2	1
chr2	167789250	167789750	2.63067	2.87494e-05	34	40	22	0	3	5
chr10	115758500	115759000	2.63056	0.00123318	13	12	14	0	0	0
chr3	81375000	81375500	2.6304	0.00125473	24	6	12	0	0	0
chr3	107821750	107822250	2.62974	0.000947769	16	26	7	1	0	0
chr7	47110750	47111250	2.62961	0.00066497	20	9	26	2	0	0
chr7	89611250	89611750	2.62958	0.00124129	12	12	15	0	0	0
chr3	93571500	93572000	2.62958	0.000910122	13	20	13	1	0	0
chr9	59327250	59327750	2.62941	0.000610765	20	14	19	2	0	0
chr9	87000000	87000500	2.62937	6.15355e-06	33	46	29	4	3	3
chr3	116115000	116115500	2.62919	0.000958058	13	9	25	0	1	0
chr11	51874500	51875000	2.62839	8.71603e-13	116	89	85	11	11	14
chr3	34333250	34333750	2.6283	0.00126616	20	6	15	0	0	0
chr6	146664250	146664750	2.62784	0.000261541	26	14	28	3	1	0
chr17	65644000	65644500	2.62776	0.000225467	22	20	24	2	2	0
chr10	70847250	70847750	2.62692	0.00042437	18	17	25	0	0	3
chr9	102760500	102761000	2.62685	0.000634644	15	23	15	0	0	2
chr18	75489500	75490000	2.62682	2.15529e-08	57	49	63	7	6	6
chr5	31575750	31576250	2.6267	0.000259509	32	14	22	2	2	0
chr6	140667750	140668250	2.62651	0.000987269	8	29	12	0	0	1
chrX	142897500	142898000	2.62634	0.000405422	28	17	15	0	1	2
chr4	147997250	147997750	2.6263	0.000823343	34	3	26	2	0	0
chr10	70846500	70847000	2.62626	0.000588309	50	6	15	2	1	0
chr9	103899000	103899500	2.62609	0.000300579	30	14	25	0	0	4
chr10	122859750	122860250	2.62608	0.00126616	13	14	12	0	0	0
chr5	149508500	149509000	2.62592	0.000464796	22	35	8	2	1	0
chr1	78746000	78746500	2.62572	0.000144052	32	26	16	1	1	3
chr1	82804250	82804750	2.62548	1.67513e-05	38	26	37	1	2	6
chr14	45325750	45326250	2.6254	0.000419806	12	29	20	1	2	0
chr16	45930750	45931250	2.62431	0.000420553	18	14	28	2	1	0
chr8	45528000	45528500	2.62431	5.61382e-07	55	40	48	2	3	10
chr7	133175750	133176250	2.62387	0.000176699	41	14	21	2	1	2
chr17	64743500	64744000	2.62372	0.000444855	25	29	9	2	0	1
chr1	158765500	158766000	2.6237	2.451e-05	36	23	44	0	6	3
chr2	117749250	117749750	2.62347	1.07537e-05	38	26	44	1	3	6
chr3	27605000	27605500	2.62338	0.000983084	21	20	7	0	1	0
chr11	59913250	59913750	2.62279	0.000410182	15	20	24	1	0	2
chr6	86768750	86769250	2.62273	0.00100153	20	23	6	0	1	0
chr15	62483250	62483750	2.62181	0.000135888	41	9	46	0	4	3
chr18	62071500	62072000	2.62145	0.000659334	26	14	13	0	1	1
chr3	53348000	53348500	2.62097	0.000309648	20	17	31	0	0	4
chr9	47575250	47575750	2.62055	0.000683031	13	29	13	2	0	0
chrX	20870000	20870500	2.62046	0.000987955	15	23	9	0	1	0
chr1	87929750	87930250	2.62039	0.00102248	28	14	7	0	1	0
chr11	32937250	32937750	2.62033	0.000666913	17	23	13	0	0	2
chr19	36131250	36131750	2.6203	0.000965905	16	14	15	0	1	0
chr9	96782500	96783000	2.62025	0.000643917	22	14	16	1	0	1
chr2	76504250	76504750	2.61952	0.00100153	20	9	17	0	0	1
chr12	40909000	40909500	2.61942	0.000439703	16	20	24	0	3	0
chr3	90574500	90575000	2.61929	4.52381e-05	22	35	29	2	2	3
chr2	113540000	113540500	2.61918	3.09031e-05	30	43	22	1	2	5
chr12	16851000	16851500	2.61918	2.81563e-06	53	32	37	6	2	4
chr8	85645000	85645500	2.61902	0.000467762	29	14	18	0	0	3
chr6	88971750	88972250	2.61898	4.47309e-06	44	35	35	4	1	6
chr10	10922250	10922750	2.61873	0.00136372	5	35	7	0	0	0
chr10	24554000	24554500	2.61864	0.0010474	17	6	25	0	1	0
chr8	110825000	110825500	2.61836	0.000449063	21	12	27	1	2	0
chr2	49934750	49935250	2.61824	0.000682807	12	26	16	2	0	0
chr8	45528500	45529000	2.61818	3.54957e-08	51	63	55	2	7	10
chr3	137959750	137960250	2.61786	2.96579e-05	38	32	25	3	5	0
chr12	32343750	32344250	2.6178	0.000475499	13	20	28	0	3	0
chr2	92944000	92944500	2.61778	0.000151076	26	20	27	3	2	0
chr11	3905750	3906250	2.61726	0.000183177	30	14	31	3	2	0
chr3	92281250	92281750	2.61679	0.000674324	22	12	18	0	1	1
chr15	38594750	38595250	2.61654	1.0082e-05	55	20	43	5	2	4
chr8	7905000	7905500	2.61619	0.00102226	24	14	9	0	1	0
chr7	135209250	135209750	2.61578	0.00100399	12	17	16	0	0	1
chr1	167241250	167241750	2.6156	0.000779741	34	17	7	0	2	0
chr11	51874750	51875250	2.61552	9.03644e-10	87	75	51	11	7	7
chr5	125232500	125233000	2.61527	0.000143323	29	20	23	2	2	1
chr5	92144750	92145250	2.61517	9.58825e-05	20	40	21	1	3	2
chr7	24387750	24388250	2.61511	0.000225715	38	17	22	0	0	5
chr6	146674000	146674500	2.61506	0.00135429	15	9	15	0	0	0
chr3	54481000	54481500	2.61488	0.000258316	25	20	21	3	0	1
chr4	124644750	124645250	2.61472	4.71096e-05	37	26	23	2	2	3
chr3	144887250	144887750	2.61422	0.001362	13	9	17	0	0	0
chr13	6126250	6126750	2.61422	0.001362	13	9	17	0	0	0
chr17	79300000	79300500	2.61422	0.001362	13	9	17	0	0	0
chr11	54031000	54031500	2.61387	4.41988e-05	32	26	27	2	2	3
chr7	132122250	132122750	2.61342	0.000465558	25	23	13	0	3	0
chr10	80073750	80074250	2.61326	6.81724e-09	79	49	62	7	9	6
chr7	123108750	123109250	2.61261	0.00136901	15	14	10	0	0	0
chr11	75399500	75400000	2.61249	0.000103538	24	26	31	5	0	1
chr14	65890750	65891250	2.61248	6.02454e-08	69	46	47	7	5	6
chr8	46083250	46083750	2.61244	0.000449063	20	14	25	2	0	1
chr4	119989250	119989750	2.61214	0.000103371	24	35	23	5	1	0
chr7	116524500	116525000	2.61146	6.71883e-06	44	26	44	3	2	6
chr1	138356250	138356750	2.61135	0.000447519	21	14	24	2	1	0
chr4	89049250	89049750	2.61125	0.00109628	25	6	17	0	0	1
chr9	79215750	79216250	2.61111	0.000468771	13	20	26	0	1	2
chr7	31013000	31013500	2.61068	0.000309877	17	35	16	0	1	3
chr2	110721250	110721750	2.61062	0.00141166	28	6	9	0	0	0
chr4	119963000	119963500	2.61061	0.00104431	11	17	17	0	0	1
chr8	109734000	109734500	2.61041	2.87984e-05	24	40	29	2	4	2
chr9	79216750	79217250	2.61032	0.00139183	12	9	18	0	0	0
chr15	83592750	83593250	2.61032	0.00139183	12	9	18	0	0	0
chr7	47109250	47109750	2.60921	0.000476836	30	14	16	1	0	2
chr10	33073750	33074250	2.60899	0.000701166	16	17	19	2	0	0
chr9	123818500	123819000	2.60835	5.47138e-05	28	40	19	2	2	3
chr6	124588500	124589000	2.6083	0.000723304	12	23	18	2	0	0
chr18	79846500	79847000	2.6083	3.74277e-06	50	32	39	1	7	4
chr4	57805250	57805750	2.60827	7.89401e-05	46	14	40	0	6	2
chr2	4326250	4326750	2.60794	4.19522e-06	38	58	28	5	6	1
chr5	31000000	31000500	2.60781	0.000603006	7	43	17	2	1	0
chr3	123054250	123054750	2.60754	0.000840916	25	6	25	0	0	2
chr14	119228000	119228500	2.60739	0.00141781	21	9	10	0	0	0
chr2	144668500	144669000	2.60708	2.84994e-05	25	37	30	2	2	4
chr8	117093750	117094250	2.60683	0.000178671	22	20	30	0	2	3
chr1	138332000	138332500	2.60679	0.00141766	17	9	13	0	0	0
chr7	111976500	111977000	2.60662	6.79256e-05	38	32	19	2	5	0
chr15	38483000	38483500	2.60647	0.000355925	21	40	10	2	0	2
chr13	52078000	52078500	2.6063	3.3129e-05	37	29	28	5	3	0
chr19	23982000	23982500	2.60602	0.000210975	30	29	17	0	5	0
chr5	33721250	33721750	2.60575	4.902e-06	33	40	39	2	3	6
chr3	57093750	57094250	2.60515	0.00144402	15	6	19	0	0	0
chr11	56508250	56508750	2.60515	0.00144402	15	6	19	0	0	0
chr11	51875500	51876000	2.60492	9.26854e-05	28	20	30	2	2	2
chr7	67803750	67804250	2.60489	0.00019028	29	29	16	1	0	4
chr5	75499500	75500000	2.60453	8.48293e-05	44	23	24	6	1	0
chr1	158892250	158892750	2.60447	3.21169e-07	49	40	66	2	9	6
chr15	63071500	63072000	2.60419	0.00109725	22	9	15	1	0	0
chr8	46430000	46430500	2.60409	5.21146e-05	26	29	30	2	4	1
chr7	132122500	132123000	2.60374	7.57894e-05	38	35	16	0	3	4
chr6	127972000	127972500	2.60371	7.11122e-08	103	61	34	5	7	10
chr15	35029500	35030000	2.60348	0.00144467	9	17	13	0	0	0
chr2	117679000	117679500	2.60348	0.00144467	9	17	13	0	0	0
chr15	59758000	59758500	2.60295	0.00076869	20	12	20	0	0	2
chr12	17891250	17891750	2.60281	0.00109195	17	17	11	0	0	1
chr6	32697500	32698000	2.6028	0.00145321	16	17	7	0	0	0
chr14	55724000	55724500	2.6028	0.00145321	16	17	7	0	0	0
chr17	73052750	73053250	2.60267	0.000468771	25	20	14	1	2	0
chr2	108827500	108828000	2.60249	4.0307e-07	48	46	45	2	7	6
chr8	105601000	105601500	2.60242	0.000154741	26	23	22	2	2	1
chr3	98383000	98383500	2.60226	9.14241e-06	37	29	39	4	2	4
chr7	133175500	133176000	2.60225	0.000641212	40	6	20	2	0	1
chr15	84280250	84280750	2.60217	2.85762e-05	30	37	25	2	4	2
chr1	138349250	138349750	2.60211	0.000755084	13	20	19	0	2	0
chr7	84328750	84329250	2.60204	0.00122267	7	40	7	1	0	0
chr13	101523500	101524000	2.60153	0.000737977	20	17	15	2	0	0
chr2	131721250	131721750	2.6013	0.000361809	24	32	13	0	0	4
chr9	49921750	49922250	2.60123	0.00146843	7	20	13	0	0	0
chr11	86623250	86623750	2.6011	6.38879e-06	51	23	48	4	2	6
chr10	56933500	56934000	2.60106	0.00147392	24	9	8	0	0	0
chr6	146664750	146665250	2.60094	0.00110693	17	20	9	1	0	0
chr9	31118250	31118750	2.60082	4.95038e-06	57	32	34	7	4	1
chr1	72352500	72353000	2.60076	0.00146305	16	14	9	0	0	0
chr10	56486750	56487250	2.60074	5.58589e-05	21	32	32	3	2	2
chr9	21225250	21225750	2.60045	0.00110245	17	17	11	0	1	0
chr8	118150250	118150750	2.60024	6.613e-05	24	32	30	2	0	5
chr4	147978500	147979000	2.6001	0.000179174	22	32	19	2	3	0
chr2	117475500	117476000	2.60007	0.000613806	36	9	19	0	3	0
chr10	24984750	24985250	2.59967	0.000558878	30	9	22	1	0	2
chr15	59794500	59795000	2.59937	0.00112046	12	20	13	0	0	1
chr6	71507750	71508250	2.59927	0.00113369	13	23	10	0	0	1
chr5	113041250	113041750	2.59913	0.00147926	18	9	12	0	0	0
chr18	43432500	43433000	2.59865	0.00039387	29	12	28	0	4	0
chr10	117023750	117024250	2.59862	1.42356e-05	46	29	33	6	0	4
chr13	34112750	34113250	2.59853	1.12406e-05	32	32	41	2	2	6
chr11	61517750	61518250	2.59823	0.000865453	25	26	6	0	2	0
chr18	22139250	22139750	2.5981	0.000551564	21	32	9	1	0	2
chr2	32458000	32458500	2.59796	1.21893e-05	33	40	33	0	4	6
chr3	93538750	93539250	2.59766	0.00115476	9	23	14	0	0	1
chr6	146955750	146956250	2.59743	0.000328696	28	26	13	0	3	1
chr1	158765750	158766250	2.59716	0.000144414	26	17	37	0	2	4
chr19	5816000	5816500	2.59713	4.58803e-06	42	55	26	7	3	2
chr8	124294750	124295250	2.59691	0.00116265	20	20	7	0	1	0
chr16	24881500	24882000	2.59664	0.000480857	15	26	17	1	1	1
chr16	22118000	22118500	2.59661	2.80442e-05	30	32	39	2	7	0
chr6	127041250	127041750	2.5965	2.2921e-05	29	32	39	5	4	0
chr2	115780750	115781250	2.59641	6.30588e-05	40	14	42	4	2	2
chr12	7967250	7967750	2.59634	0.00030963	30	20	16	2	2	0
chr3	60647750	60648250	2.59599	0.000520806	22	12	25	2	1	0
chr13	69768250	69768750	2.59551	9.63813e-07	51	49	33	2	6	6
chr1	143391000	143391500	2.59503	0.0007775	21	17	14	2	0	0
chr3	20189250	20189750	2.59502	0.000533434	30	12	18	2	1	0
chr15	66862000	66862500	2.59473	0.00155135	3	20	20	0	0	0
chr4	121020500	121021000	2.59472	0.000532773	25	17	17	0	0	3
chr2	113539750	113540250	2.59439	6.13674e-06	26	58	38	3	2	7
chr6	36540250	36540750	2.5938	0.00117859	11	12	22	0	1	0
chr2	113539500	113540000	2.59371	8.09259e-08	42	58	59	6	7	5
chr8	126767250	126767750	2.59363	4.6284e-05	48	23	23	2	2	4
chr11	86592500	86593000	2.59353	1.89584e-06	50	37	39	7	2	4
chr18	36405250	36405750	2.59346	4.90787e-08	45	72	50	5	8	6
chr11	103678750	103679250	2.59329	0.000489561	17	23	18	2	1	0
chr3	83290250	83290750	2.59315	0.000188155	28	26	18	2	0	3
chr11	73036250	73036750	2.59306	0.000411978	13	35	21	0	0	4
chr7	101871000	101871500	2.59286	2.87079e-06	40	43	35	4	2	6
chr3	36171250	36171750	2.59249	6.11697e-05	30	23	31	1	3	3
chr1	82834250	82834750	2.59247	0.000175447	29	23	19	2	1	2
chr9	101439750	101440250	2.59166	0.00125988	12	32	6	0	0	1
chr15	59827750	59828250	2.59163	0.000318629	21	26	18	0	3	1
chr1	91094750	91095250	2.59159	0.000155858	24	43	17	5	1	0
chr1	115742750	115743250	2.59153	4.49302e-05	41	20	32	4	1	3
chr7	114131500	114132000	2.5914	0.00054851	15	20	24	0	3	0
chr8	106958000	106958500	2.59127	0.00120533	15	9	21	0	0	1
chr9	123296500	123297000	2.59103	0.000347214	24	14	27	0	2	2
chr5	54578250	54578750	2.59093	0.000824587	18	12	22	2	0	0
chr13	112871500	112872000	2.59093	0.000824587	18	12	22	2	0	0
chr6	91206750	91207250	2.5905	0.000525278	20	14	24	2	0	1
chr8	104448750	104449250	2.59043	0.000544585	15	23	21	0	3	0
chr13	108714500	108715000	2.59027	0.00155376	13	12	13	0	0	0
chr16	86453750	86454250	2.59027	0.00155376	13	12	13	0	0	0
chrX	167133250	167133750	2.59027	0.00155376	13	12	13	0	0	0
chr2	125901500	125902000	2.59027	0.00155376	13	12	13	0	0	0
chr17	9864250	9864750	2.59013	1.0854e-10	74	78	74	11	7	10
chr13	94264000	94264500	2.59001	0.000823881	21	12	19	2	0	0
chr9	62786250	62786750	2.5899	8.04237e-05	29	29	28	1	0	6
chr3	90587500	90588000	2.58894	3.0114e-06	40	35	42	3	5	4
chr2	140100500	140101000	2.58881	3.53717e-05	37	17	57	5	4	1
chr5	4323500	4324000	2.58846	0.00127577	15	6	26	0	0	1
chr9	75196500	75197000	2.58826	0.000130349	32	23	25	5	0	1
chr16	86516250	86516750	2.58787	0.00012588	18	26	34	2	1	3
chr4	141955250	141955750	2.58771	0.000832036	20	20	12	0	2	0
chr1	78745500	78746000	2.58742	1.24535e-07	70	52	39	5	9	4
chr2	25145750	25146250	2.58725	0.00124762	13	26	8	0	0	1
chr9	79637750	79638250	2.58686	0.00121054	16	12	16	0	0	1
chr3	61442500	61443000	2.58638	0.00122275	15	20	10	0	0	1
chr4	11763000	11763500	2.58623	0.00158965	11	14	13	0	0	0
chr15	67221750	67222250	2.58623	0.00158965	11	14	13	0	0	0
chr12	108453500	108454000	2.58618	0.00012007	26	32	21	2	4	0
chr9	118532500	118533000	2.58603	0.00123318	20	9	16	0	1	0
chr8	107502750	107503250	2.58601	0.00083277	22	12	17	1	0	1
chr10	56685250	56685750	2.58595	0.00120981	61	6	4	1	1	0
chr17	9864500	9865000	2.58573	5.65851e-10	69	81	63	11	5	10
chr11	120693750	120694250	2.58529	3.68542e-05	49	23	29	0	4	5
chr16	22117750	22118250	2.58493	6.01025e-05	33	20	41	3	5	0
chr10	91158750	91159250	2.58451	0.0012289	17	12	15	0	0	1
chr11	72854500	72855000	2.58451	0.0012289	17	12	15	0	0	1
chr12	32344250	32344750	2.58448	0.00122538	16	12	16	0	1	0
chr6	60045250	60045750	2.58443	3.14813e-05	55	20	36	6	0	4
chr3	93311500	93312000	2.58436	0.000149224	33	17	29	0	2	4
chr6	94794750	94795250	2.58397	0.00123374	15	20	10	0	1	0
chr14	106011000	106011500	2.58392	2.68844e-05	25	32	41	1	5	3
chr2	167606750	167607250	2.58363	2.53707e-05	36	23	48	2	1	7
chr19	38480000	38480500	2.58331	0.000595392	15	29	16	0	3	0
chr11	59596500	59597000	2.58325	1.28905e-05	41	26	37	2	4	4
chr11	117256000	117256500	2.58318	1.35388e-10	90	78	66	9	14	6
chr16	49970500	49971000	2.58311	2.28902e-06	41	37	46	2	7	4
chrX	20379000	20379500	2.58279	0.00124122	12	14	18	0	1	0
chr1	135771000	135771500	2.58265	6.82343e-06	38	46	36	0	3	9
chr10	16545000	16545500	2.58264	7.75392e-06	41	32	39	7	2	2
chr13	51852500	51853000	2.58244	3.30866e-05	32	32	26	3	2	3
chr2	125901000	125901500	2.58234	0.000242322	30	17	25	0	1	4
chr9	69476000	69476500	2.58228	0.00162552	13	14	11	0	0	0
chr18	60891250	60891750	2.58215	1.2853e-05	37	32	35	3	1	6
chr2	107392750	107393250	2.58213	0.00124129	17	12	15	0	1	0
chr14	32049750	32050250	2.58195	0.000433738	50	6	26	0	2	3
chr2	103686000	103686500	2.58194	6.613e-05	26	55	16	3	2	3
chr14	46635250	46635750	2.58177	1.06463e-05	33	40	31	5	2	3
chr7	64065500	64066000	2.58161	0.000186729	22	26	22	2	2	1
chr11	117843250	117843750	2.58157	0.000525818	38	9	24	0	0	4
chr17	6180500	6181000	2.58152	5.36403e-05	25	40	28	2	0	6
chr1	106407750	106408250	2.58144	0.000209404	21	29	21	0	3	2
chr15	59758250	59758750	2.58091	0.00012588	32	23	23	3	0	3
chr15	87660000	87660500	2.58063	0.000213195	29	23	19	0	2	3
chr2	125716500	125717000	2.58062	5.06221e-06	33	35	50	6	2	4
chr2	10250500	10251000	2.58013	0.00033115	22	23	19	2	2	0
chr2	113943750	113944250	2.58002	8.97153e-05	29	17	39	2	3	2
chr4	130273500	130274000	2.5796	0.0012558	17	12	15	1	0	0
chr1	125507750	125508250	2.5796	0.0012558	17	12	15	1	0	0
chr10	80074000	80074500	2.57933	5.64157e-09	79	55	58	9	5	9
chr7	67797500	67798000	2.5792	1.17735e-07	53	69	38	7	7	4
chr13	91448750	91449250	2.57893	0.000544267	18	20	19	1	2	0
chr14	31769250	31769750	2.57879	0.00091232	24	9	19	1	1	0
chr18	70602000	70602500	2.57873	8.24927e-05	17	37	31	2	2	3
chr4	135301000	135301500	2.57867	0.000383683	22	14	29	2	2	0
chr17	13676000	13676500	2.57861	0.00133916	25	6	16	0	1	0
chr11	86622000	86622500	2.57855	0.00039233	30	23	13	0	1	3
chr18	4337750	4338250	2.57818	0.000551608	17	20	20	1	2	0
chr2	122735250	122735750	2.57804	0.000397367	34	17	15	0	2	2
chr14	78330250	78330750	2.57804	7.33517e-05	30	37	18	2	2	3
chr8	49348750	49349250	2.57789	2.90312e-05	30	26	42	3	5	1
chr11	59597750	59598250	2.57763	2.21092e-05	38	29	30	2	5	2
chr18	43432750	43433250	2.57741	0.000286214	29	17	28	0	5	0
chr17	75256750	75257250	2.57733	0.000356332	26	17	21	2	0	2
chr7	110709250	110709750	2.57699	6.78711e-06	33	46	32	5	4	2
chr3	84588250	84588750	2.57691	0.000887143	18	14	19	2	0	0
chr5	8083000	8083500	2.57691	0.000887143	18	14	19	2	0	0
chr4	124652250	124652750	2.57667	0.000379544	16	29	20	0	3	1
chr8	46430250	46430750	2.57651	0.000590067	20	20	18	0	3	0
chr6	115493250	115493750	2.5764	1.61741e-06	54	32	45	5	3	6
chr5	29875500	29876000	2.57638	0.00169574	20	9	10	0	0	0
chr12	81235500	81236000	2.57633	0.000594457	17	29	13	2	0	1
chr4	119870000	119870500	2.57597	0.000913132	13	17	21	0	2	0
chr1	186576750	186577250	2.57594	4.4721e-09	66	66	67	8	13	3
chr18	76355500	76356000	2.57585	5.42106e-05	48	23	22	3	2	3
chr4	147980250	147980750	2.57543	0.000407824	34	12	20	2	1	1
chr13	91448500	91449000	2.57538	0.000899027	20	17	14	0	2	0
chr2	131722250	131722750	2.57533	0.000940753	17	26	10	0	2	0
chr18	89098250	89098750	2.57506	0.000607185	24	12	22	1	2	0
chr3	64278000	64278500	2.57427	0.000159053	22	26	30	0	1	5
chr8	24990750	24991250	2.57395	0.000120074	28	29	20	2	3	1
chr9	42209750	42210250	2.57381	7.31698e-05	37	26	21	2	3	2
chr8	57013750	57014250	2.57349	2.42352e-07	51	46	54	8	7	2
chr13	81359000	81359500	2.57349	5.09104e-09	55	69	66	8	5	10
chr6	91267250	91267750	2.57346	0.000153215	32	32	16	2	4	0
chr4	47408000	47408500	2.57331	0.000645629	18	12	28	0	2	1
chr3	126397500	126398000	2.57317	0.00132795	16	20	9	0	1	0
chr17	72959000	72959500	2.57277	2.62629e-05	42	32	24	4	1	4
chr4	124644500	124645000	2.57274	2.34322e-05	34	29	33	2	2	5
chr4	88928500	88929000	2.5727	0.00138717	18	6	22	0	0	1
chr4	118290000	118290500	2.5721	0.000622662	29	20	10	1	1	1
chr4	111598250	111598750	2.57195	3.61307e-06	48	32	45	7	1	5
chrX	142897750	142898250	2.57187	0.000249786	29	20	22	0	1	4
chr17	79299000	79299500	2.57184	0.00174881	16	6	17	0	0	0
chr11	59602250	59602750	2.57161	0.00099688	21	9	22	0	0	2
chr3	84592500	84593000	2.57136	3.17833e-05	29	40	29	0	3	6
chr6	143639750	143640250	2.57083	0.00174461	16	12	10	0	0	0
chr12	116181500	116182000	2.57081	0.00070601	34	9	18	2	0	1
chr2	25145500	25146000	2.57015	0.000168395	30	35	15	0	4	2
chr10	80074250	80074750	2.57008	1.25887e-09	84	66	61	8	5	13
chr7	113823750	113824250	2.56962	0.00102433	16	9	28	2	0	0
chr6	127971500	127972000	2.56962	5.83951e-06	46	49	24	3	3	6
chr18	36405750	36406250	2.56942	1.75199e-05	63	26	26	2	4	5
chr14	62992500	62993000	2.56898	0.000223363	26	26	18	1	1	3
chr13	69768500	69769000	2.56896	7.25594e-06	45	37	28	4	3	4
chr9	21729500	21730000	2.56809	0.000281597	36	23	15	4	0	1
chr13	110927750	110928250	2.56786	0.00180739	21	3	18	0	0	0
chr15	67222500	67223000	2.5672	0.00135526	16	17	11	1	0	0
chr2	32201500	32202000	2.56711	0.00180392	15	23	4	0	0	0
chr13	5836500	5837000	2.56705	5.91295e-05	41	17	44	4	5	0
chr13	56735750	56736250	2.56704	0.00178726	15	17	7	0	0	0
chr16	37729750	37730250	2.56655	4.92591e-05	38	17	45	5	2	2
chr7	112334500	112335000	2.56623	0.00140756	22	17	7	0	1	0
chr3	60654750	60655250	2.56621	0.0018015	18	6	15	0	0	0
chr16	43340000	43340500	2.56621	0.0018015	18	6	15	0	0	0
chr8	7908250	7908750	2.56606	5.4408e-06	38	35	43	1	6	5
chr15	62467750	62468250	2.56555	1.71899e-05	36	29	38	3	1	6
chr11	86606750	86607250	2.56539	0.00102593	16	29	9	2	0	0
chr8	117094000	117094500	2.56524	0.000167863	25	20	32	0	2	4
chr7	109713000	109713500	2.56523	0.000674014	26	20	13	0	3	0
chr11	65347500	65348000	2.56522	0.00180129	17	9	12	0	0	0
chr18	36404500	36405000	2.56516	1.91213e-06	57	49	34	0	9	6
chr11	117839500	117840000	2.56414	0.000677111	20	26	13	0	3	0
chr13	68749500	68750000	2.5627	0.00141344	11	20	13	0	0	1
chr15	32002750	32003250	2.56257	0.000269503	33	20	18	0	2	3
chr15	74595250	74595750	2.56252	0.000366427	33	37	8	2	3	0
chr5	91621500	91622000	2.5624	0.00141166	17	17	10	0	0	1
chr9	88370000	88370500	2.56238	0.000422865	15	29	20	0	2	2
chr1	86125750	86126250	2.56234	0.000469142	17	37	13	2	0	2
chr10	23569750	23570250	2.56203	0.00183366	11	17	10	0	0	0
chr13	32935000	32935500	2.56193	2.89108e-06	67	49	28	10	3	2
chr5	18307000	18307500	2.56193	0.00142807	12	23	10	0	1	0
chr3	108593500	108594000	2.56188	0.000698761	28	17	14	0	3	0
chr9	62786500	62787000	2.56184	5.10256e-06	42	37	37	5	1	6
chr2	103686750	103687250	2.56148	0.000511875	30	9	28	2	2	0
chr9	21688750	21689250	2.56144	0.000605861	45	9	17	0	3	1
chr13	13637000	13637500	2.56137	0.00104962	17	9	25	0	1	1
chr18	61705000	61705500	2.56097	8.79181e-05	37	29	18	2	3	2
chr11	81410750	81411250	2.56092	0.000429668	28	20	16	0	1	3
chr2	167331500	167332000	2.56083	0.000261628	24	32	15	1	1	3
chr14	46634250	46634750	2.56078	0.00102855	26	17	9	1	0	1
chr3	103759500	103760000	2.56059	4.79661e-05	26	35	28	1	3	4
chr4	81832250	81832750	2.56024	0.00145896	16	23	7	0	1	0
chr4	147984500	147985000	2.56013	5.38015e-10	79	63	80	11	6	11
chr13	94730500	94731000	2.55999	0.00142626	17	17	10	0	1	0
chr2	113530000	113530500	2.55999	0.00142626	17	17	10	0	1	0
chr6	82908250	82908750	2.55941	0.00100915	18	17	15	0	0	2
chr4	150705750	150706250	2.55888	0.00145405	17	20	8	0	1	0
chr12	35871750	35872250	2.55879	0.000689844	12	23	22	0	1	2
chr4	130274000	130274500	2.5587	0.000416415	20	23	20	1	0	3
chr13	110913750	110914250	2.55834	0.000425432	20	17	26	2	0	2
chr2	117710000	117710500	2.55788	0.00146158	15	9	20	1	0	0
chr11	4628750	4629250	2.55775	0.000672821	24	20	13	0	1	2
chr11	72792250	72792750	2.55731	0.000690923	15	23	20	3	0	0
chr15	83572000	83572500	2.55725	0.00069746	21	26	11	0	1	2
chr11	86624500	86625000	2.55725	6.42032e-08	49	55	57	8	5	6
chr11	65380500	65381000	2.5572	0.00145321	13	20	11	0	1	0
chr11	51875000	51875500	2.55713	1.71164e-06	58	49	33	9	5	1
chr12	5347500	5348000	2.5569	0.00102837	18	23	10	1	0	1
chr11	87308500	87309000	2.55674	1.24401e-05	55	23	41	1	5	6
chr16	93079750	93080250	2.55671	0.00145152	15	14	14	0	0	1
chr18	60669000	60669500	2.55585	6.30104e-09	73	49	80	7	8	10
chr4	121211500	121212000	2.55556	0.000248728	18	26	25	2	2	1
chr16	33878500	33879000	2.55547	2.33007e-06	38	55	37	1	7	6
chr10	24559500	24560000	2.55542	0.00105483	12	26	13	0	1	1
chr16	46092750	46093250	2.55532	0.00115263	17	32	6	0	1	1
chr5	33721000	33721500	2.55531	8.80825e-06	37	35	36	3	2	6
chr6	60045000	60045500	2.55526	0.000609472	44	9	17	2	0	2
chr5	96805500	96806000	2.55525	1.84483e-06	38	55	37	6	6	2
chr6	91642750	91643250	2.55514	0.000823795	25	32	6	2	0	1
chr2	101986000	101986500	2.55511	0.00146925	15	12	16	0	0	1
chr15	32333250	32333750	2.55509	0.000712666	22	17	18	0	0	3
chr9	21225500	21226000	2.55497	0.00107951	25	17	10	0	2	0
chr11	86588000	86588500	2.55479	2.79647e-06	45	46	31	3	4	6
chr16	20429000	20429500	2.55475	0.000707115	21	26	11	0	2	1
chr5	33720250	33720750	2.55429	0.000273414	20	35	16	2	2	1
chr3	103760000	103760500	2.55421	0.000434572	26	14	23	2	1	1
chr4	57733000	57733500	2.55416	0.00109701	12	29	12	2	0	0
chr5	55355500	55356000	2.55404	0.00103803	18	17	15	0	2	0
chr2	113548000	113548500	2.55393	0.000718862	24	20	14	0	3	0
chr3	54480250	54480750	2.55369	0.000117143	30	29	25	0	1	6
chr9	22087000	22087500	2.55363	0.000691318	16	17	23	0	2	1
chr15	83593250	83593750	2.55242	0.000721946	21	20	16	0	0	3
chr9	45060000	45060500	2.55238	0.000681601	22	17	17	1	0	2
chr3	60347000	60347500	2.5522	0.000276896	45	9	28	2	2	2
chr11	81412250	81412750	2.55219	0.000480448	28	14	22	0	3	1
chr2	129634000	129634500	2.55192	0.0010622	22	17	12	2	0	0
chr10	91300000	91300500	2.55187	2.83525e-06	37	46	46	1	4	9
chr3	146308000	146308500	2.55181	0.0011351	17	29	8	2	0	0
chr4	13517000	13517500	2.55172	0.00068719	17	17	22	2	0	1
chr5	124923250	124923750	2.5515	0.00104473	17	14	18	0	1	1
chr14	21808000	21808500	2.55137	0.000500877	30	17	19	4	0	0
chr4	136650000	136650500	2.55134	0.0010464	17	17	16	2	0	0
chr6	91647500	91648000	2.55127	6.13637e-05	26	40	24	2	1	5
chr2	27327000	27327500	2.55123	0.000100203	29	32	22	0	4	3
chr5	31666250	31666750	2.55113	0.00046104	26	17	20	0	1	3
chr4	147982750	147983250	2.55099	0.000443844	24	26	14	2	2	0
chr6	91210000	91210500	2.55063	9.60221e-05	30	20	32	3	2	2
chr17	10702750	10703250	2.55053	0.000272029	21	29	20	2	3	0
chr8	7893000	7893500	2.55048	4.54305e-05	41	23	34	4	5	0
chr17	46933500	46934000	2.55005	0.000436789	24	23	16	2	0	2
chr14	106011750	106012250	2.55001	1.44211e-06	50	37	72	1	5	12
[truncated: 36,205 more rows]

## Sheet: RNA_vs_H3K27ac_promoter
RNA-seq_differential_signal							H3K27ac_promoter_differential_signal					H3K27ac_promoter_counts
Gene_symbol	Gene_ENSEMBL	log2FoldChange	pvalue	padj	BZ_geo_RPK	LV_geo_RPK	Log2(FC)_DESeq2	StdErr	Wald-stat	P-value	P-adj	chr	start	end	H3K27ac_BZ_qn	H3K27ac_LV
Adamts20	ENSMUSG00000022449	5.21008	1.34219e-33	2.45178e-29	179.2	3.3	0.216728	0.282615	0.766867	0.443161	NA	chr15	94463418	94467418	92.7965	79
Fn1	ENSMUSG00000026193	4.33048	1.14179e-32	1.04285e-28	204	8.6	0.42765	0.266362	1.60552	0.108379	0.902689	chr1	71651200	71655200	220.265	133
Postn	ENSMUSG00000027750	5.04696	4.88354e-31	2.97359e-27	212.8	3.9	0.277274	0.271198	1.02241	0.306589	0.971931	chr3	54359109	54363109	187.43	130
Sprr1a	ENSMUSG00000050359	6.52175	6.18153e-23	1.49523e-19	287.9	0.1	1.40381	0.273816	5.12684	2.94651e-07	0.00048882	chr3	92483895	92487895	273.621	55
Anxa2	ENSMUSG00000032231	4.39449	4.75827e-23	1.49523e-19	210.5	7.3	0.948363	0.261106	3.63209	0.00028113	0.0557187	chr9	69451620	69455620	759.072	257
Col12a1	ENSMUSG00000032332	5.42673	6.54833e-23	1.49523e-19	48.1	0.3	0.826101	0.270405	3.05505	0.00225023	0.193823	chr9	79716831	79720831	243.522	97
Rtn4	ENSMUSG00000020458	3.44613	3.85695e-23	1.49523e-19	883.5	73.1	0.35517	0.25074	1.41649	0.156632	0.950185	chr11	29690947	29694947	983.782	578
Msn	ENSMUSG00000031207	4.08834	5.07462e-23	1.49523e-19	1207.8	63.4	0.120058	0.272732	0.440206	0.659788	0.972431	chrX	96094042	96098042	657.651	484
Nppa	ENSMUSG00000041616	3.95121	1.17343e-22	2.38168e-19	389.4	21.6	1.62372	0.265876	6.10706	1.01481e-09	9.252e-06	chr4	147998722	148002722	1188.53	198
Map1b	ENSMUSG00000052727	4.68917	8.78617e-22	1.60497e-18	336	10.9	0.551667	0.258838	2.13132	0.0330629	0.660117	chr13	99514540	99518540	364.511	181
Clu	ENSMUSG00000022037	2.88646	1.26075e-18	2.09365e-15	764.1	97.8	-0.0100303	0.231647	-0.0433	0.965462	0.996473	chr14	65966483	65970483	22831.9	15886
Ahnak2	ENSMUSG00000072812	4.74874	1.46447e-18	2.22929e-15	412.4	11	0.827538	0.256014	3.2324	0.00122756	0.135649	chr12	112800657	112804657	283.197	121
Col1a1	ENSMUSG00000001506	3.52173	8.50528e-18	1.19512e-14	336.2	25.6	0.387891	0.254204	1.5259	0.127034	0.930223	chr11	94934224	94938224	242.154	158
NA	ENSMUSG00000101941	-5.6304	1.10816e-17	1.44591e-14	0.2	102.2	-0.289536	0.267316	-1.08312	0.278755	0.971931	chr9	101340194	101344194	146.387	183
Plk2	ENSMUSG00000021701	3.59679	1.65659e-17	2.01169e-14	487.1	32.7	0.183592	0.251241	0.73074	0.464938	0.971931	chr13	110393046	110397046	698.854	513
Sorbs3	ENSMUSG00000022091	3.96529	1.79011e-17	2.01169e-14	1188.7	66.4	-0.146755	0.269269	-0.545012	0.585746	0.971931	chr14	70209989	70213989	326.855	317
Ryr3	ENSMUSG00000057378	5.24097	1.87216e-17	2.01169e-14	139.8	2.1	0.330433	0.278568	1.18618	0.23555	NA	chr2	113215096	113219096	97.8813	68
Bhlhe40	ENSMUSG00000030103	2.54389	2.2561e-17	2.28956e-14	745.9	122.4	0.0396648	0.243411	0.162954	0.870555	0.987047	chr6	108658629	108662629	1284.69	1297
Gadd45g	ENSMUSG00000021453	3.62907	4.89903e-17	4.71003e-14	538	35.6	-0.135074	0.240338	-0.562016	0.574105	0.971931	chr13	51844678	51848678	1180.88	1194
Rasl11b	ENSMUSG00000049907	3.45114	6.16612e-17	5.63182e-14	1092	83.2	0.00318842	0.244562	0.0130373	0.989598	0.999297	chr5	74193286	74197286	911.346	801
Snap91	ENSMUSG00000033419	2.87314	7.54676e-17	6.5646e-14	94.5	11.7	0.394503	0.257447	1.53236	0.125433	0.928226	chr9	86878654	86882654	270.884	173
Slc22a4	ENSMUSG00000020334	3.11659	1.06121e-16	8.50916e-14	443.7	46.5	0.166279	0.239821	0.693347	0.488092	0.971931	chr11	54026090	54030090	1285.32	1002
Ppm1e	ENSMUSG00000046442	3.88556	1.07139e-16	8.50916e-14	706.3	35.5	0.227785	0.267983	0.849999	0.395326	0.971931	chr11	87357023	87361023	247.627	180
Serpina3n	ENSMUSG00000021091	4.64175	2.11101e-16	1.59602e-13	98.9	2.3	0.794966	0.2535	3.13596	0.00171295	0.16474	chr12	104404729	104408729	320.136	142
Trim47	ENSMUSG00000020773	4.01718	2.27166e-16	1.59602e-13	309.9	14.4	-0.189769	0.256976	-0.738471	0.460228	0.971931	chr11	116125210	116129210	139.546	161
NA	ENSMUSG00000097900	-2.36218	2.24845e-16	1.59602e-13	202	1135.4	-0.231825	0.273014	-0.84913	0.395809	0.971931	chr6	6350267	6354267	91.5253	120
Uchl1	ENSMUSG00000029223	5.62985	3.34186e-16	2.26096e-13	325.8	0.6	0.493512	0.264208	1.8679	0.0617767	0.794383	chr5	66674091	66678091	158.7	92
Dpysl3	ENSMUSG00000024501	3.27779	3.62722e-16	2.28477e-13	91.5	8	0.993428	0.266425	3.72874	0.00019244	0.0438619	chr18	43436286	43440286	770.165	237
Ncam1	ENSMUSG00000039542	4.86934	3.60836e-16	2.28477e-13	111.4	1.4	0.870256	0.270141	3.22149	0.00127526	0.137593	chr9	49796925	49800925	303.719	112
Lrp8	ENSMUSG00000028613	4.7426	1.72322e-15	1.04927e-12	364.4	6.6	0.5748	0.262807	2.18715	0.0287313	0.614169	chr4	107799869	107803869	277.725	146
Slc6a6	ENSMUSG00000030096	1.94943	3.8079e-15	2.24384e-12	586.6	147.7	0.119975	0.245282	0.48913	0.62475	0.971931	chr6	91682053	91686053	1310.59	1041
Ulk3	ENSMUSG00000032308	2.51046	4.88467e-15	2.78838e-12	185.1	28.2	0.336799	0.258068	1.30507	0.191867	0.971931	chr9	57587452	57591452	637.05	395
Tgfb2	ENSMUSG00000039239	2.76213	5.3066e-15	2.93744e-12	460.3	62.4	0.413499	0.26695	1.54898	0.121387	0.919126	chr1	186703989	186707989	757.488	422
Serpinb1a	ENSMUSG00000044734	3.86883	5.9763e-15	3.11912e-12	80.4	4.3	0.820197	0.263394	3.11395	0.00184599	0.168456	chr13	32849185	32853185	307.823	125
Piezo2	ENSMUSG00000041482	4.65297	5.82715e-15	3.11912e-12	14.9	0.3	0.118436	0.281457	0.420798	0.673903	NA	chr18	63385183	63389183	72.4576	64
Mfap4	ENSMUSG00000042436	3.56973	1.05491e-14	5.35279e-12	127.2	7	0.919718	0.265846	3.45959	0.000540993	0.0850385	chr11	61483431	61487431	270.884	100
Fbln2	ENSMUSG00000064080	3.60083	1.26066e-14	6.22391e-12	318.5	23.4	1.18861	0.260527	4.5623	5.05955e-06	0.00330512	chr6	91210455	91214455	531.705	140
Serpine1	ENSMUSG00000037411	3.91691	3.02827e-14	1.45572e-11	1416.2	78.3	-0.0779377	0.25505	-0.305578	0.759926	0.977711	chr5	137070268	137074268	1194.35	1136
Thbs4	ENSMUSG00000021702	4.09757	5.27569e-14	2.47105e-11	166.4	6.2	0.370819	0.273885	1.35392	0.175762	0.969194	chr13	92792818	92796818	158.7	100
Zfp697	ENSMUSG00000050064	4.24391	6.35272e-14	2.90113e-11	157.3	6.2	1.1839	0.253932	4.66228	3.1273e-06	0.00271539	chr3	98380461	98384461	803.444	226
Tgfb1i1	ENSMUSG00000030782	3.74696	1.25485e-13	5.5908e-11	280	16.5	0.463489	0.249095	1.86069	0.0627877	0.795489	chr7	128244812	128248812	527.706	306
Slc25a34	ENSMUSG00000040740	-2.30561	2.29292e-13	9.97258e-11	87.3	475	-0.430349	0.248612	-1.73101	0.0834507	0.865149	chr4	141621821	141625821	943.353	1233
Phldb2	ENSMUSG00000033149	3.2446	2.71884e-13	1.155e-10	755.8	61.9	0.295354	0.27587	1.07063	0.284338	NA	chr16	45951598	45955598	87.7118	67
Plcg2	ENSMUSG00000034330	2.98959	4.63101e-13	1.92261e-10	106.9	11.6	0.135352	0.262217	0.516182	0.605727	0.971931	chr8	117496291	117500291	216.16	177
Col11a1	ENSMUSG00000027966	4.89427	5.62299e-13	2.28256e-10	10.5	0.1	0.31593	0.281288	1.12316	0.261371	NA	chr3	114028540	114032540	72.4576	51
9430020K01Rik	ENSMUSG00000033960	3.25466	5.8639e-13	2.3286e-10	158.1	14.4	0.307321	0.260942	1.17774	0.238902	0.971931	chr18	4632878	4636878	277.725	192
Cspg4	ENSMUSG00000032911	4.09825	9.20983e-13	3.57949e-10	620.2	28.4	0.643597	0.249925	2.57516	0.0100193	0.387411	chr9	56863033	56867033	1529.58	737
Flna	ENSMUSG00000031328	3.34805	1.10572e-12	4.20794e-10	330.3	28.9	-0.287863	0.265316	-1.08498	0.277931	0.971931	chrX	74247820	74251820	280.162	312
Uck2	ENSMUSG00000026558	3.7741	2.39255e-12	8.91933e-10	393.1	25.1	0.259033	0.264331	0.979955	0.327108	0.971931	chr1	167283320	167287320	599.017	397
Vmp1	ENSMUSG00000018171	2.00978	2.67189e-12	9.7615e-10	209.6	49.6	-0.147135	0.262374	-0.560784	0.574945	0.971931	chr11	86681836	86685836	386.667	389
Pdgfb	ENSMUSG00000000489	3.7685	3.74338e-12	1.34079e-09	119.9	7.2	0.652925	0.246152	2.65253	0.00798916	0.343572	chr15	80012977	80016977	713.116	342
Pfkp	ENSMUSG00000021196	2.06886	4.24731e-12	1.49203e-09	1077.4	251.8	0.311202	0.248386	1.2529	0.210244	0.971931	chr13	6646777	6650777	978.729	638
Adam9	ENSMUSG00000031555	2.56116	6.34676e-12	2.18748e-09	166.3	26.8	0.0874431	0.260776	0.335319	0.737385	0.97486	chr8	25014927	25018927	805.219	592
Rgs11	ENSMUSG00000024186	3.48757	6.69703e-12	2.26546e-09	201.8	14.4	0.227588	0.262141	0.868187	0.385292	0.971931	chr17	26200951	26204951	168.277	131
D630029K05Rik	ENSMUSG00000031294	4.71284	6.99991e-12	2.32486e-09	140.5	2.9	-0.0641942	0.267558	-0.239926	0.810387	0.981104	chr10	116962707	116966707	147.755	146
Cpne2	ENSMUSG00000034361	3.64675	7.55148e-12	2.46326e-09	48.3	2.9	0.675801	0.261341	2.58589	0.0097127	0.382508	chr8	94530990	94534990	197.007	96
Col3a1	ENSMUSG00000026043	2.52311	8.00775e-12	2.56627e-09	125.6	19.4	0.0223842	0.276663	0.0809078	0.935515	0.993657	chr1	45309538	45313538	175.117	157
Rin1	ENSMUSG00000024883	4.11558	1.07105e-11	3.37325e-09	88	2.7	0.393804	0.25616	1.53734	0.124211	0.925728	chr19	5048481	5052481	233.946	153
Sh3bp2	ENSMUSG00000054520	3.92661	1.45231e-11	4.49649e-09	168.6	7.5	0.521538	0.256626	2.03228	0.042125	0.709722	chr5	34523838	34527838	370.536	191
Cttnbp2nl	ENSMUSG00000062127	2.40126	1.84155e-11	5.6066e-09	222.4	40.3	0.450298	0.245583	1.83359	0.0667153	0.80897	chr3	105051146	105055146	1409.98	821
NA	ENSMUSG00000085779	-2.41828	2.4351e-11	7.29214e-09	141.8	845.1	0.00198416	0.250857	0.00790952	0.993689	0.999347	chr10	81192609	81196609	1554.25	1601
Myh10	ENSMUSG00000020900	3.57514	2.64782e-11	7.80124e-09	658.8	49.7	0.075883	0.254684	0.29795	0.765741	0.978322	chr11	68689559	68693559	828.803	628
Cacnb3	ENSMUSG00000003352	3.93593	2.78803e-11	8.08397e-09	43.5	2.1	0.412781	0.268177	1.53921	0.123753	0.925002	chr15	98628840	98632840	210.688	131
Cald1	ENSMUSG00000029761	4.34396	3.14344e-11	8.97207e-09	937.7	38.1	0.368341	0.268362	1.37255	0.169892	0.962354	chr6	34596500	34600500	471.455	266
Grhl1	ENSMUSG00000020656	3.69155	3.45407e-11	9.70701e-09	148.1	7.8	0.346105	0.263705	1.31247	0.189363	0.971931	chr12	24570283	24574283	385.599	231
Ctgf	ENSMUSG00000019997	2.84549	3.64215e-11	1.00805e-08	1837.7	220.4	-0.324263	0.246348	-1.31628	0.188081	0.971931	chr10	24593442	24597442	1081.49	1323
Col1a2	ENSMUSG00000029661	2.64694	4.06868e-11	1.10929e-08	116.1	16.8	0.102854	0.276756	0.371641	0.71016	0.974839	chr6	4502814	4506814	212.056	173
NA	ENSMUSG00000085643	-4.13791	4.58002e-11	1.23034e-08	1.1	113.1	-0.39333	0.278933	-1.41012	0.158504	NA	chr4	55991739	55995739	52.1186	86
Lif	ENSMUSG00000034394	3.59843	6.17379e-11	1.63444e-08	60.1	4.2	0.162849	0.261676	0.622332	0.533724	0.971931	chr11	4255557	4259557	145.019	119
Serpinb1c	ENSMUSG00000079049	3.44825	6.40441e-11	1.67128e-08	215	14	0.223652	0.272867	0.819638	0.412423	0.971931	chr13	32896211	32900211	109.322	89
Igf1r	ENSMUSG00000005533	2.28496	7.79046e-11	2.00434e-08	286.1	55.6	0.291902	0.254907	1.14513	0.252154	0.971931	chr7	67950827	67954827	852.387	522
4833412C05Rik	ENSMUSG00000097697	3.9339	8.46655e-11	2.14803e-08	43.4	0.8	1.11249	0.254432	4.37246	1.22854e-05	0.00658856	chr7	67802139	67806139	366.652	121
Col16a1	ENSMUSG00000040690	3.9248	8.79646e-11	2.20116e-08	39	1.7	0.162934	0.271996	0.599032	0.549151	0.971931	chr4	130045840	130049840	206.584	160
Eno2	ENSMUSG00000004267	3.32492	1.01883e-10	2.48146e-08	165.5	9.8	0.565839	0.260941	2.16845	0.0301244	0.626585	chr6	124767673	124771673	210.688	115
4930481A15Rik	ENSMUSG00000086938	-2.83569	1.01772e-10	2.48146e-08	24.3	214.8	0.237679	0.270983	0.877101	0.380432	0.971931	chr19	5404740	5408740	140.915	107
Ccdc136	ENSMUSG00000029769	3.29687	1.04105e-10	2.50222e-08	88.4	7.2	0.0926245	0.259143	0.357426	0.720773	0.974849	chr6	29394309	29398309	157.332	137
Rpl3l	ENSMUSG00000002500	-2.07088	1.0787e-10	2.52624e-08	201.2	886.7	-0.682037	0.249745	-2.73093	0.00631556	0.307088	chr17	24725820	24729820	722.676	1227
Myof	ENSMUSG00000048612	2.60157	1.07241e-10	2.52624e-08	26.4	4.2	0.716435	0.264205	2.71167	0.00669458	0.315424	chr19	38041577	38045577	194.271	89
Map6	ENSMUSG00000055407	3.93417	1.16829e-10	2.67192e-08	51.2	0.4	0.558177	0.262378	2.12738	0.0333884	0.663109	chr7	99265447	99269447	194.271	107
Rras	ENSMUSG00000038387	2.01738	1.17016e-10	2.67192e-08	248.9	58.4	0.140019	0.254745	0.549645	0.582563	0.971931	chr7	45015961	45019961	1339.22	1019
Iqgap1	ENSMUSG00000030536	2.16351	1.2419e-10	2.80071e-08	691.2	142.5	0.605463	0.25676	2.35809	0.0183692	0.495257	chr7	80823974	80827974	299.615	156
Tln1	ENSMUSG00000028465	2.64894	1.58756e-10	3.53658e-08	687.9	107.7	0.21208	0.244419	0.867689	0.385565	0.971931	chr4	43560691	43564691	1044.43	751
Il22ra1	ENSMUSG00000037157	4.39805	1.77042e-10	3.89642e-08	12.2	0.1	0.0181864	0.262068	0.0693957	0.944675	0.994125	chr4	135726172	135730172	165.54	153
NA	ENSMUSG00000099871	2.75965	1.81921e-10	3.95613e-08	770.3	105.2	0.774562	0.28318	2.73523	0.00623359	NA	chrY	90835413	90839413	80.0847	31
Traf3	ENSMUSG00000021277	2.09687	1.90666e-10	4.09752e-08	62	13.7	0.116743	0.250392	0.46624	0.641044	0.971931	chr12	111164370	111168370	538.799	426
Pdgfc	ENSMUSG00000028019	2.80244	2.00592e-10	4.26071e-08	25.5	3.1	0.892429	0.25684	3.47465	0.00051152	0.0830987	chr3	81034416	81038416	328.345	131
Nmt2	ENSMUSG00000026643	2.02238	2.14883e-10	4.51179e-08	158.9	37.4	0.372291	0.249144	1.49428	0.135102	0.935719	chr2	3282212	3286212	603.771	372
Fat1	ENSMUSG00000070047	2.79467	2.23376e-10	4.58528e-08	498.4	68.5	0.413448	0.263723	1.56773	0.116944	0.914984	chr8	44933447	44937447	762.242	431
Wisp2	ENSMUSG00000027656	3.86116	2.23403e-10	4.58528e-08	49.2	1.5	0.319074	0.270712	1.17865	0.238538	0.971931	chr2	163818861	163822861	258.571	169
Loxl4	ENSMUSG00000025185	2.47511	2.29309e-10	4.65421e-08	31.8	5.1	0.682765	0.259856	2.62747	0.00860221	0.357239	chr19	42610813	42614813	387.105	167
NA	ENSMUSG00000092994	-4.40008	2.43513e-10	4.88818e-08	2.2	280.4	0.0387107	0.266867	0.145056	0.884667	0.990253	chr19	37177186	37181186	769.843	603
Fndc1	ENSMUSG00000071984	3.13115	2.61079e-10	5.12809e-08	89.3	9.1	0.511139	0.266387	1.91879	0.0550115	0.762753	chr17	7825302	7829302	197.007	108
Fam20c	ENSMUSG00000025854	2.86231	2.59359e-10	5.12809e-08	192.2	21.3	0.15842	0.252257	0.628011	0.529996	0.971931	chr5	138752514	138756514	719.455	541
Map1a	ENSMUSG00000027254	3.76945	2.98253e-10	5.73494e-08	176.5	10.6	0.236112	0.25596	0.922456	0.356291	0.971931	chr2	121287600	121291600	194.271	146
Cpeb1	ENSMUSG00000025586	2.13182	2.9536e-10	5.73494e-08	842.9	185.8	0.0992216	0.258189	0.384299	0.700757	0.974839	chr7	81453465	81457465	470.656	375
Pik3r3	ENSMUSG00000028698	2.60491	3.3119e-10	6.30192e-08	26.5	3.8	0.12965	0.24404	0.531264	0.595236	0.971931	chr4	116219618	116223618	995.574	777
Col4a5	ENSMUSG00000031274	1.90797	4.21002e-10	7.92829e-08	346.2	88.6	0.0905546	0.273027	0.331669	0.740139	0.975012	chrX	141473385	141477385	499.181	381
Cd44	ENSMUSG00000005087	3.36832	4.27242e-10	7.9637e-08	112.5	7	0.842254	0.250798	3.3583	0.000784227	0.104523	chr2	102899665	102903665	613.28	241
Bgn	ENSMUSG00000031375	2.47143	5.47977e-10	1.0111e-07	288	46.8	-0.185625	0.274348	-0.676605	0.498657	0.971931	chrX	73481602	73485602	108.08	121
Arhgap23	ENSMUSG00000049807	3.25671	5.84953e-10	1.06853e-07	758.3	69.8	-0.0472415	0.241387	-0.195709	0.844838	0.98466	chr11	97413533	97417533	451.64	420
Tspan17	ENSMUSG00000025875	3.16467	6.21411e-10	1.11789e-07	92.1	8.5	0.519732	0.259187	2.00524	0.0449376	0.726753	chr13	54787377	54791377	254.467	148
Capn2	ENSMUSG00000026509	2.2062	6.24209e-10	1.11789e-07	249.2	51.3	0.327638	0.25608	1.27944	0.200744	0.971931	chr1	182515608	182519608	681.422	431
Pcgf6	ENSMUSG00000025050	2.94417	7.16581e-10	1.27085e-07	69.6	7.6	0.0604468	0.26699	0.226401	0.82089	0.981804	chr19	47048906	47052906	149.123	133
NA	ENSMUSG00000074813	3.41707	9.01315e-10	1.58311e-07	128.9	6.3	0.159001	0.280861	0.566122	0.571311	NA	chr2	128500765	128504765	63.5593	57
Hbegf	ENSMUSG00000024486	2.78502	9.64871e-10	1.66276e-07	355	46.1	0.291882	0.249672	1.16906	0.242378	0.971931	chr18	36513805	36517805	960.199	634
Ppp2r2c	ENSMUSG00000029120	-3.91284	9.58116e-10	1.66276e-07	0.3	13.6	-0.180982	0.281813	-0.642209	0.520738	NA	chr5	36866513	36870513	61.0169	83
Tnfaip8	ENSMUSG00000062210	-2.94845	1.02475e-09	1.74945e-07	18.5	206.1	-0.240413	0.264066	-0.910428	0.362597	0.971931	chr18	49977427	49981427	278.655	296
Leprel1	ENSMUSG00000038168	3.85143	1.1497e-09	1.94459e-07	34.7	1.2	0.304238	0.266563	1.14134	0.25373	0.971931	chr16	26103784	26107784	246.259	173
Clca1	ENSMUSG00000056025	3.72756	1.21314e-09	2.03189e-07	61.3	2.2	0.984236	0.270386	3.64011	0.000272524	0.0552985	chr3	144758977	144762977	187.43	63
Fhl1	ENSMUSG00000023092	1.98443	1.22356e-09	2.03189e-07	782.2	193.2	-0.0759258	0.264507	-0.287046	0.774077	0.978994	chrX	56729787	56733787	712.568	621
Pak3	ENSMUSG00000031284	3.7308	1.24863e-09	2.05484e-07	14.6	0.6	0.18528	0.285306	0.649408	0.516075	NA	chrX	143516591	143520591	41.9491	32
Celsr3	ENSMUSG00000023473	-2.44847	1.26094e-09	2.05657e-07	8.3	57.9	0.11552	0.268969	0.429491	0.667566	0.972431	chr9	108824320	108828320	110.593	103
Shroom3	ENSMUSG00000029381	2.96693	1.34199e-09	2.16939e-07	2228.9	253.3	-0.179872	0.273026	-0.658809	0.510018	0.971931	chr5	92681435	92685435	181.958	200
Ltbp2	ENSMUSG00000002020	3.45449	1.61832e-09	2.5706e-07	98.4	7.1	0.439585	0.257156	1.70941	0.0873755	0.866403	chr12	84874532	84878532	188.798	119
NA	ENSMUSG00000083111	-2.64952	1.60921e-09	2.5706e-07	7.3	61.3	0.0213694	0.284622	0.0750797	0.940151	NA	chr2	177054838	177058838	30.5084	30
NA	ENSMUSG00000100546	-4.65227	1.64325e-09	2.5877e-07	0.1	32.9	-0.287469	0.254839	-1.12804	0.259302	0.971931	chr1	92715202	92719202	518.198	604
Chrna10	ENSMUSG00000066279	-2.53775	1.92404e-09	3.00397e-07	31.2	232	0.0579928	0.266615	0.217515	0.827807	0.982981	chr7	102114828	102118828	102.966	101
Ccdc68	ENSMUSG00000038903	3.73054	1.94667e-09	3.01355e-07	106	1.3	0.914999	0.278853	3.28129	0.00103332	0.124779	chr18	69923426	69927426	309.191	100
Anapc15	ENSMUSG00000030649	2.42134	2.04303e-09	3.13613e-07	37.1	5.9	0.211686	0.274585	0.77093	0.440748	NA	chr7	101861715	101865715	91.5253	76
Hspa1a	ENSMUSG00000091971	3.95227	2.17871e-09	3.31654e-07	167.9	8.4	0.077881	0.258037	0.301821	0.762789	0.977786	chr17	34970156	34974156	595.848	477
Runx1	ENSMUSG00000022952	2.71453	2.47306e-09	3.7335e-07	43.4	5.4	0.594348	0.264965	2.24312	0.0248889	0.578554	chr16	92824149	92828149	165.54	88
Ptn	ENSMUSG00000029838	3.36971	2.65056e-09	3.96867e-07	21.7	1.1	0.305274	0.269052	1.13463	0.256532	0.971931	chr6	36808220	36812220	122.034	91
Mylk2	ENSMUSG00000027470	4.05423	2.73756e-09	4.03282e-07	37.3	1	0.337905	0.267261	1.26432	0.206114	0.971931	chr2	152909352	152913352	162.804	111
Cst10	ENSMUSG00000033156	-4.46642	2.72084e-09	4.03282e-07	0.2	39.1	0.29774	0.282479	1.05403	0.291871	NA	chr2	149403057	149407057	69.9152	53
NA	ENSMUSG00000063524	1.6836	2.87967e-09	4.20662e-07	966.7	294.8	-0.113343	0.25483	-0.444781	0.656478	0.972431	chr4	150234721	150238721	1137.08	1114
5430419D17Rik	ENSMUSG00000006204	3.05885	2.90159e-09	4.20662e-07	71.9	7.6	0.0361369	0.28391	0.127283	0.898716	NA	chr7	131172402	131176402	50.8474	52
NA	ENSMUSG00000098925	4.51142	2.98426e-09	4.2924e-07	331.1	9.7	-0.513385	0.272402	-1.88466	0.0594763	0.782757	chr11	87469368	87473368	234.974	334
Lgals4	ENSMUSG00000053964	-2.97829	3.0971e-09	4.4199e-07	45.9	580.8	-0.704652	0.271836	-2.59219	0.0095366	0.378846	chr7	28831854	28835854	124.497	255
Fhad1	ENSMUSG00000051435	3.18597	3.19306e-09	4.52152e-07	29.7	2.9	0.209387	0.262922	0.796385	0.425808	0.971931	chr4	142013082	142017082	169.645	133
Rai14	ENSMUSG00000022246	2.43928	3.49262e-09	4.87021e-07	23.7	3.9	0.251129	0.260284	0.964827	0.334631	0.971931	chr15	10712624	10716624	269.516	196
Smad7	ENSMUSG00000025880	2.76875	3.47874e-09	4.87021e-07	332.6	47.6	-0.0945581	0.239283	-0.395173	0.692715	0.972559	chr18	75365529	75369529	875.971	858
Pfkfb1	ENSMUSG00000025271	-2.92626	3.63002e-09	5.02346e-07	14.7	173.8	-0.459004	0.265372	-1.72967	0.0836901	0.865149	chrX	150586229	150590229	234.974	312
Camk2g	ENSMUSG00000021820	1.73381	3.7081e-09	5.09292e-07	312.4	89.2	0.268689	0.263724	1.01883	0.308284	0.971931	chr14	20792088	20796088	445.849	286
Actn1	ENSMUSG00000015143	3.12888	4.10638e-09	5.59786e-07	383.5	40.5	0.0895491	0.254626	0.351689	0.725072	0.974849	chr12	80258371	80262371	796.796	596
Sorbs2	ENSMUSG00000031626	1.2955	4.47957e-09	6.06136e-07	9870.3	3942.8	0.218872	0.27935	0.783504	0.433331	NA	chr8	45505788	45509788	82.627	67
Tmem82	ENSMUSG00000043085	-2.82057	4.68161e-09	6.28815e-07	22.8	242.7	-0.396857	0.266769	-1.48764	0.136845	0.937794	chr4	141616633	141620633	313.299	388
Piezo1	ENSMUSG00000014444	2.65983	5.16668e-09	6.88903e-07	167.1	26.6	0.0659304	0.258247	0.2553	0.798492	0.980421	chr8	122549329	122553329	378.068	301
Ildr2	ENSMUSG00000040612	3.42906	5.52547e-09	7.31404e-07	20.1	0.6	0.758301	0.269716	2.81148	0.0049314	0.274648	chr1	166252139	166256139	158.898	73
Myh9	ENSMUSG00000022443	3.64998	5.80117e-09	7.62374e-07	1144.1	91.9	0.277861	0.255894	1.08584	0.277549	0.971931	chr15	77840175	77844175	982.098	642
Creb5	ENSMUSG00000053007	3.80579	5.92651e-09	7.73283e-07	624.3	38.8	0.312779	0.255001	1.22658	0.21998	0.971931	chr6	53285270	53289270	1472.3	945
Fam124a	ENSMUSG00000035184	3.91058	6.02994e-09	7.81198e-07	113.1	4.3	0.42713	0.268224	1.59244	0.111286	0.903892	chr14	62553737	62557737	334.387	182
Myo5a	ENSMUSG00000034593	2.23924	6.1153e-09	7.86677e-07	174.5	33.9	0.364961	0.270251	1.35045	0.176871	0.970451	chr9	75069015	75073015	262.676	166
Lrtm1	ENSMUSG00000045776	-3.1048	6.16067e-09	7.86972e-07	50.6	701.4	-0.528524	0.259759	-2.03467	0.0418838	0.709722	chr14	29016208	29020208	744.575	1108
Fam129b	ENSMUSG00000026796	3.71766	6.47369e-09	8.21215e-07	68.2	4.2	0.470336	0.263755	1.78323	0.0745483	0.834786	chr2	32874114	32878114	576.831	312
Rusc2	ENSMUSG00000035969	2.65201	7.1873e-09	8.99249e-07	585.4	84.5	0.276068	0.248732	1.1099	0.267041	0.971931	chr4	43379979	43383979	946.722	648
Trp53	ENSMUSG00000059552	1.8113	7.15173e-09	8.99249e-07	241.7	67.5	-0.0275081	0.247123	-0.111314	0.911368	0.990886	chr11	69578359	69582359	897.87	812
B4galt5	ENSMUSG00000017929	2.35998	7.72784e-09	9.55959e-07	134	22.7	0.646758	0.247006	2.61839	0.00883469	0.357982	chr2	167347183	167351183	546.722	266
Il17ra	ENSMUSG00000002897	3.2785	7.79755e-09	9.55959e-07	34.8	2.7	0.350355	0.268914	1.30285	0.192625	0.971931	chr6	120461247	120465247	171.013	113
Hip1	ENSMUSG00000039959	2.8596	7.78914e-09	9.55959e-07	138.8	17.3	0.0397093	0.258714	0.153487	0.878014	0.988788	chr5	135543120	135547120	640.22	532
Tgfb3	ENSMUSG00000021253	3.00724	8.27707e-09	1.00798e-06	88.1	9.8	0.261913	0.259759	1.00829	0.313315	0.971931	chr12	86077041	86081041	565.739	376
NA	ENSMUSG00000098641	4.38456	8.49681e-09	1.02789e-06	325.2	11.1	-0.451465	0.256889	-1.75743	0.0788445	0.849928	chr11	87460286	87464286	323.279	442
Abcc9	ENSMUSG00000030249	-2.18752	8.59304e-09	1.03269e-06	188.3	978.8	-0.682218	0.247807	-2.75303	0.00590473	0.297617	chr6	142700315	142704315	552.535	921
Ldlrad3	ENSMUSG00000048058	2.77242	9.73028e-09	1.16172e-06	57.1	5	0.144652	0.259536	0.557349	0.577289	0.971931	chr2	102184385	102188385	192.903	158
Sbno2	ENSMUSG00000035673	2.84516	1.05727e-08	1.2541e-06	421.5	56.7	1.02319	0.270965	3.77612	0.000159293	0.0384129	chr10	80103571	80107571	494.049	142
Npas4	ENSMUSG00000045903	3.45366	1.07296e-08	1.2645e-06	47.2	2.3	-0.142265	0.26875	-0.529357	0.596558	0.971931	chr19	4988316	4992316	109.448	125
Elf4	ENSMUSG00000031103	2.11091	1.0821e-08	1.2671e-06	193.8	42.7	0.130338	0.278454	0.468076	0.63973	0.971931	chrX	48461132	48465132	106.78	92
Spaca6	ENSMUSG00000080316	3.51737	1.16293e-08	1.35308e-06	2248.3	183.6	0.72526	0.260368	2.78552	0.0053442	0.286606	chr17	17825158	17829158	795.52	339
Nrxn3	ENSMUSG00000066392	3.84085	1.18884e-08	1.37446e-06	12.5	0.5	0.186131	0.284763	0.653633	0.513348	NA	chr12	88720876	88724876	62.2881	54
Myc	ENSMUSG00000022346	3.38534	1.21031e-08	1.39049e-06	937.7	79.1	0.0323261	0.246143	0.13133	0.895514	0.990253	chr15	61983391	61987391	1498.33	1511
Fosl2	ENSMUSG00000029135	2.18543	1.26885e-08	1.44863e-06	215.5	43.7	0.0755968	0.256069	0.295221	0.767825	0.978322	chr5	32133801	32137801	1223.04	1165
Nfatc2	ENSMUSG00000027544	2.4721	1.28207e-08	1.45463e-06	754.7	128.9	-0.138321	0.260791	-0.530393	0.59584	0.971931	chr2	168599657	168603657	172.381	185
Lyst	ENSMUSG00000019726	1.8763	1.33229e-08	1.50228e-06	198.6	53.3	0.0705495	0.246588	0.286102	0.7748	0.978994	chr13	13588397	13592397	473.826	395
Fam214b	ENSMUSG00000036002	2.36339	1.34237e-08	1.50436e-06	468	86.8	-0.243402	0.25197	-0.965995	0.334047	0.971931	chr4	43044220	43048220	673.824	699
Nt5e	ENSMUSG00000032420	1.81285	1.36473e-08	1.52009e-06	326.7	90.3	0.0647905	0.256633	0.252464	0.800683	0.980421	chr9	88325197	88329197	1096.65	888
Lpl	ENSMUSG00000015568	-2.03894	1.40916e-08	1.56007e-06	430.9	1985.6	-0.0816427	0.254406	-0.320915	0.748275	0.977354	chr8	68878491	68882491	1412.3	1571
Pink1	ENSMUSG00000028756	-2.15037	1.53051e-08	1.6842e-06	16.8	83.2	-0.126059	0.256583	-0.491301	0.623214	0.971931	chr4	138324307	138328307	852.387	849
Slc38a3	ENSMUSG00000010064	-1.86897	1.63958e-08	1.79156e-06	147.8	577.6	-0.515755	0.247093	-2.08729	0.0368618	0.682011	chr9	107667530	107671530	898.996	1503
NA	ENSMUSG00000099291	4.2881	1.64768e-08	1.79156e-06	328.7	12.4	-0.426802	0.264173	-1.61562	0.106177	0.899741	chr11	87446627	87450627	354.973	476
NA	ENSMUSG00000098943	4.28882	1.78818e-08	1.93282e-06	323	12.4	-0.491868	0.259026	-1.89891	0.0575758	0.777783	chr11	87441237	87445237	410.438	587
Pik3r5	ENSMUSG00000020901	3.546	1.87568e-08	2.01547e-06	14.7	0.8	0.429383	0.260089	1.65091	0.0987574	0.883419	chr11	68430121	68434121	216.16	134
NA	ENSMUSG00000099947	-4.07848	1.88991e-08	2.01889e-06	1.1	109.5	-0.425561	0.260552	-1.63331	0.102404	0.887955	chr9	101335972	101339972	354.973	475
Fyb	ENSMUSG00000022148	3.52767	1.96697e-08	2.08899e-06	324.6	18.8	-0.0350089	0.27004	-0.129643	0.896849	0.990253	chr15	6520853	6524853	117.657	115
Ung	ENSMUSG00000029591	-2.54033	2.00296e-08	2.11001e-06	11.2	88.2	-0.694315	0.258039	-2.69074	0.00712943	0.327451	chr5	114128386	114132386	424.7	719
Plekho1	ENSMUSG00000015745	3.04992	2.00986e-08	2.11001e-06	1413.5	151.6	0.390699	0.246874	1.58259	0.113516	0.908147	chr3	95994001	95998001	1461.05	1075
Ndst2	ENSMUSG00000039308	1.73873	2.03393e-08	2.12307e-06	118.5	34	-0.00657566	0.252384	-0.0260542	0.979214	0.997464	chr14	20732562	20736562	456.394	411
Atxn10	ENSMUSG00000016541	2.08173	2.05236e-08	2.13014e-06	281.6	62.6	0.186162	0.245711	0.757644	0.448664	0.971931	chr15	85334245	85338245	665.575	494
LOC102634333	ENSMUSG00000090066	2.81513	2.21117e-08	2.282e-06	1732.8	252.2	-0.250463	0.248284	-1.00878	0.313082	0.971931	chr3	138063052	138067052	1722	2271
Ampd2	ENSMUSG00000027889	2.80196	2.23761e-08	2.29631e-06	25.4	3.2	-0.0021917	0.261553	-0.00837955	0.993314	0.999347	chr3	108084651	108088651	350.955	295
Mllt4	ENSMUSG00000068036	2.18608	2.41842e-08	2.46801e-06	734.9	159	0.139196	0.264371	0.526516	0.598529	0.971931	chr17	13758539	13762539	660.821	485
Prkcd	ENSMUSG00000021948	2.76676	2.48114e-08	2.51795e-06	233.6	32.4	0.39993	0.25381	1.57571	0.115094	0.909995	chr14	30624210	30628210	436.811	253
Cpn2	ENSMUSG00000023176	-2.60037	2.50899e-08	2.53214e-06	12.8	110	-0.375668	0.257929	-1.45648	0.14526	0.942087	chr16	30265499	30269499	184.694	249
NA	ENSMUSG00000078866	-2.29222	2.54581e-08	2.55518e-06	23.6	145.2	-0.528569	0.264024	-2.00198	0.0452874	0.726753	chr2	177462733	177466733	464.318	694
Sox9	ENSMUSG00000000567	3.49923	3.03559e-08	3.01365e-06	33.3	2.8	0.0535337	0.264982	0.202028	0.839895	0.984358	chr11	112780224	112784224	134.074	120
Dusp18	ENSMUSG00000047205	-2.08632	3.09639e-08	3.05739e-06	23.6	116.3	-0.509169	0.254986	-1.99685	0.0458413	0.726753	chr11	3893240	3897240	523.898	697
Itga5	ENSMUSG00000000555	2.49784	3.47002e-08	3.40789e-06	1945.3	335.7	0.132585	0.235533	0.562914	0.573493	0.971931	chr15	103364763	103368763	1305.53	1047
Sec1	ENSMUSG00000040364	3.53925	3.57582e-08	3.48715e-06	14.4	0.3	0.0063006	0.277996	0.0226644	0.981918	0.997464	chr7	45692402	45696402	104.237	112
Xirp2	ENSMUSG00000027022	3.0054	3.5889e-08	3.48715e-06	19621.3	2180.4	0.384703	0.284432	1.35253	0.176206	NA	chr2	67171834	67175834	53.3898	34
Ankrd2	ENSMUSG00000025172	4.16597	3.97815e-08	3.84492e-06	134.7	0.2	0.596949	0.257876	2.31487	0.0206199	0.528067	chr19	42034000	42038000	316.032	164
Fmnl3	ENSMUSG00000023008	2.57009	4.00932e-08	3.85464e-06	125.4	19.5	0.0384477	0.274822	0.1399	0.888739	0.990253	chr15	99368482	99372482	231.209	202
Spns2	ENSMUSG00000040447	3.55802	4.9252e-08	4.71039e-06	31.7	1.6	0.169229	0.258014	0.655891	0.511895	0.971931	chr11	72487904	72491904	207.952	166
Ces1d	ENSMUSG00000056973	-3.47758	5.34082e-08	5.08129e-06	3.1	172.6	-1.07925	0.261347	-4.12958	3.63431e-05	0.0129797	chr8	93195838	93199838	436.301	1200
Efhd2	ENSMUSG00000040659	3.65663	5.65517e-08	5.3249e-06	62	1.6	0.807907	0.260778	3.09806	0.00194793	0.176198	chr4	141872920	141876920	554.298	211
Arhgap44	ENSMUSG00000033389	1.77908	5.64748e-08	5.3249e-06	230.1	65.4	0.154697	0.258699	0.59798	0.549853	0.971931	chr11	65160961	65164961	290.705	211
Grk5	ENSMUSG00000003228	2.33717	5.71007e-08	5.34902e-06	288.4	52.7	-0.133897	0.269134	-0.497511	0.618828	0.971931	chr19	60887749	60891749	618.034	602
Akap2	ENSMUSG00000038729	2.23557	5.92208e-08	5.51932e-06	52.2	10.5	-0.0654378	0.278433	-0.235022	0.814192	0.981104	chr4	57715657	57719657	95.3389	102
Cyb5r3	ENSMUSG00000018042	3.17491	6.33415e-08	5.84373e-06	127.8	12.5	0.621927	0.246384	2.52422	0.0115956	0.408962	chr15	83170592	83174592	665.575	334
Tsc22d1	ENSMUSG00000022010	2.31975	6.32597e-08	5.84373e-06	335.2	66.3	0.283375	0.263157	1.07683	0.281556	0.971931	chr14	76412961	76416961	363.005	230
Slc9a2	ENSMUSG00000026062	-2.49668	6.50037e-08	5.96695e-06	2.6	18.7	-0.914319	0.260293	-3.51265	0.000443668	0.0758892	chr1	40678574	40682574	207.862	429
Soga1	ENSMUSG00000055485	2.6364	6.56914e-08	5.99992e-06	62.6	9.7	0.177632	0.267306	0.664527	0.506353	0.971931	chr2	157077254	157081254	301.249	211
Serpinb1b	ENSMUSG00000051029	3.69631	6.79418e-08	6.1746e-06	11.1	0.1	0.747857	0.268158	2.78887	0.00528922	0.285336	chr13	33076575	33080575	300.983	130
Arid5b	ENSMUSG00000019947	2.21886	6.90367e-08	6.21228e-06	460	92.5	-0.041501	0.252607	-0.164291	0.869502	0.986783	chr10	68276740	68280740	1167.12	1246
Tiam2	ENSMUSG00000023800	2.69736	6.87756e-08	6.21228e-06	459.5	66	0.10922	0.280239	0.38974	0.696729	NA	chr17	3324573	3328573	86.4406	79
Ifitm10	ENSMUSG00000045777	3.10274	7.17951e-08	6.42883e-06	24.5	2	0.355381	0.252877	1.40535	0.159918	0.956867	chr7	142371753	142375753	770.165	482
Serpina3i	ENSMUSG00000079014	2.7766	7.3721e-08	6.56908e-06	32.6	3.3	1.19335	0.26715	4.46696	7.93387e-06	0.00482221	chr12	104261122	104265122	454.886	113
Sun3	ENSMUSG00000040985	-3.92237	7.45393e-08	6.60975e-06	0.7	159.5	-0.885474	0.245609	-3.60522	0.000311887	0.0604995	chr11	9046991	9050991	290	586
Clca2	ENSMUSG00000028262	3.48578	7.55645e-08	6.6683e-06	19.9	0.7	0.346907	0.280163	1.23823	0.21563	NA	chr3	144817494	144821494	92.7965	66
NA	ENSMUSG00000102076	-4.16003	7.83953e-08	6.88484e-06	0.9	169	0.280084	0.285062	0.982535	0.325836	NA	chr9	90906197	90910197	58.4745	43
Ddah2	ENSMUSG00000007039	3.39419	8.59466e-08	7.5119e-06	67.3	4.9	-0.0457433	0.260562	-0.175556	0.860643	0.986158	chr17	35057035	35061035	316.312	278
Kif1a	ENSMUSG00000014602	3.53903	8.77799e-08	7.63559e-06	12.3	0.9	-0.268349	0.27077	-0.991059	0.321657	0.971931	chr1	93099951	93103951	86.4406	119
Kcnj14	ENSMUSG00000058743	3.5881	9.00752e-08	7.79812e-06	15.9	0.7	0.895316	0.259548	3.44952	0.000561589	0.085056	chr7	45822782	45826782	548.273	194
Hspa1b	ENSMUSG00000090877	3.75444	9.81755e-08	8.4593e-06	185.7	10.6	0.0056687	0.264946	0.0213956	0.98293	0.997476	chr17	34957238	34961238	629.127	535
Col24a1	ENSMUSG00000028197	3.50602	1.04009e-07	8.91984e-06	5.7	0.2	0.18305	0.279981	0.653793	0.513245	NA	chr3	145290472	145294472	81.3559	69
Dzank1	ENSMUSG00000037259	-1.49808	1.08779e-07	9.28536e-06	48.3	142.5	-0.180066	0.255277	-0.705376	0.480576	0.971931	chr2	144525414	144529414	187.43	209
Satb1	ENSMUSG00000023927	1.62662	1.1367e-07	9.65774e-06	190.9	60.1	-0.25549	0.273896	-0.932798	0.350924	NA	chr17	51831290	51835290	76.2711	103
Bmp1	ENSMUSG00000022098	2.63337	1.15592e-07	9.77554e-06	564.7	90	0.276736	0.239719	1.15442	0.24833	0.971931	chr14	70518234	70522234	488.088	340
Actn4	ENSMUSG00000054808	2.9546	1.1666e-07	9.82038e-06	3028.3	378.7	0.397876	0.259768	1.53166	0.125607	0.928758	chr7	28960340	28964340	773.335	454
Flnc	ENSMUSG00000068699	2.72327	1.18529e-07	9.93197e-06	3416	504.2	-0.465934	0.238871	-1.95056	0.0511091	0.747429	chr6	29431256	29435256	1300.46	2097
Phlda1	ENSMUSG00000020205	2.20337	1.24566e-07	1.03902e-05	330.1	70.4	0.173162	0.249823	0.693138	0.488223	0.971931	chr10	111504286	111508286	1180.88	873
Bend4	ENSMUSG00000092060	3.57642	1.25832e-07	1.0448e-05	17.9	1.2	0.355376	0.265859	1.33671	0.181317	0.971931	chr5	67426310	67430310	168.277	112
Adam12	ENSMUSG00000054555	3.0627	1.29089e-07	1.067e-05	7.1	0.6	0.365392	0.274421	1.3315	0.183023	NA	chr7	134230146	134234146	100.424	71
Kif6	ENSMUSG00000023999	-2.1321	1.35734e-07	1.11687e-05	13	66.9	0.0413258	0.276739	0.149332	0.881292	NA	chr17	49613136	49617136	73.7287	74
Cnksr1	ENSMUSG00000028841	2.07502	1.38372e-07	1.13347e-05	799.4	186.7	0.377992	0.264861	1.42713	0.153542	0.947119	chr4	134236399	134240399	886.078	488
Car11	ENSMUSG00000003273	2.58368	1.39259e-07	1.13565e-05	187.1	28.4	-0.0570647	0.257449	-0.221654	0.824583	0.98258	chr7	45697843	45701843	334.387	301
Tpm2	ENSMUSG00000028464	2.63027	1.41967e-07	1.15259e-05	999.1	142	0.0164002	0.2689	0.0609898	0.951367	0.994275	chr4	43521765	43525765	331.374	271
Als2cl	ENSMUSG00000044037	2.80637	1.43221e-07	1.15762e-05	137.9	19.2	-0.165885	0.253691	-0.653888	0.513184	0.971931	chr9	110877870	110881870	970.306	998
Col5a2	ENSMUSG00000026042	3.24887	1.50921e-07	1.20915e-05	22.6	2.2	0.17684	0.26379	0.670382	0.502615	0.971931	chr1	45501282	45505282	171.013	134
Tnc	ENSMUSG00000028364	3.63435	1.50451e-07	1.20915e-05	18	1.1	0.301319	0.274656	1.09708	0.272606	NA	chr4	64045015	64049015	90.2542	69
Cblb	ENSMUSG00000022637	2.48439	1.51611e-07	1.20938e-05	367.1	68.9	-0.215739	0.239667	-0.900161	0.368035	0.971931	chr16	52029225	52033225	982.098	1060
Socs3	ENSMUSG00000053113	3.74773	1.64181e-07	1.29831e-05	84.2	4.3	0.724837	0.257744	2.81224	0.00491985	0.274648	chr11	117968047	117972047	871.586	370
Nes	ENSMUSG00000004891	3.0148	1.68475e-07	1.32652e-05	129.5	13.9	0.52307	0.266237	1.96467	0.0494519	0.738498	chr3	87969078	87973078	290.038	158
Dnmt1	ENSMUSG00000004099	2.71733	1.85451e-07	1.45392e-05	109	16.6	0.0185459	0.284022	0.0652974	0.947937	NA	chr9	20957888	20961888	55.9322	59
Mlph	ENSMUSG00000026303	3.17036	1.90084e-07	1.48387e-05	17.6	1.7	0.313301	0.269644	1.16191	0.245273	NA	chr1	90913085	90917085	109.322	81
Col4a1	ENSMUSG00000031502	2.74669	1.96269e-07	1.52564e-05	466	74	0.115665	0.238741	0.48448	0.628045	0.971931	chr8	11310826	11314826	1317.33	1065
Myo1c	ENSMUSG00000017774	2.09386	2.0325e-07	1.57321e-05	398.2	90.8	-0.0705091	0.246048	-0.286566	0.774444	0.978994	chr11	75648504	75652504	778.266	700
Rhbdf1	ENSMUSG00000020282	2.42402	2.10673e-07	1.62378e-05	154.3	27.9	0.286263	0.236589	1.20996	0.226295	0.971931	chr11	32220300	32224300	635.465	446
Fam114a1	ENSMUSG00000029185	2.76139	2.1725e-07	1.66744e-05	66.3	8.8	-0.099447	0.255343	-0.389464	0.696933	0.973908	chr5	64968071	64972071	212.056	218
Pdcd6ip	ENSMUSG00000032504	1.58749	2.18665e-07	1.67128e-05	339.8	113.5	0.237795	0.253513	0.938	0.348244	0.971931	chr9	113706259	113710259	508.689	354
A530016L24Rik	ENSMUSG00000043122	-2.20042	2.25392e-07	1.71551e-05	24.9	134	-0.583064	0.239061	-2.43897	0.014729	0.451083	chr12	112487448	112491448	850.247	1521
Fam198b	ENSMUSG00000027955	2.07235	2.39988e-07	1.81903e-05	99.6	22.8	0.898087	0.265253	3.38577	0.00070979	0.0995597	chr3	79882533	79886533	1236.47	398
Farp1	ENSMUSG00000025555	2.55356	2.48623e-07	1.87669e-05	114.7	19.5	0.0271596	0.262626	0.103415	0.917633	0.991332	chr14	121033200	121037200	269.618	222
Tlr2	ENSMUSG00000027995	3.71998	2.60543e-07	1.95858e-05	6.2	0.2	0.457956	0.261359	1.75221	0.0797374	0.852628	chr3	83839767	83843767	551.476	303
Gpx3	ENSMUSG00000018339	1.85117	2.68852e-07	2.01276e-05	515.6	139.6	0.234424	0.255916	0.91602	0.359656	0.971931	chr11	54900453	54904453	567.323	397
6430548M08Rik	ENSMUSG00000031824	2.64065	2.72858e-07	2.0344e-05	90.3	15.5	-0.071766	0.26122	-0.274734	0.783521	0.98003	chr8	120112152	120116152	379.574	341
2810474O19Rik	ENSMUSG00000032712	1.60646	2.8164e-07	2.09135e-05	579.6	183.8	0.322372	0.254975	1.26433	0.206112	0.971931	chr6	149307414	149311414	1462.2	951
Myl3	ENSMUSG00000059741	-1.25095	2.92247e-07	2.16133e-05	691.8	1689.5	-0.271867	0.265374	-1.02446	0.305616	0.971931	chr9	110739861	110743861	117.657	146
Sema3b	ENSMUSG00000057969	2.67969	2.9581e-07	2.16776e-05	599.3	86.7	0.409445	0.247786	1.65242	0.0984499	0.883419	chr9	107607229	107611229	1000.63	619
NA	ENSMUSG00000080888	-2.21371	2.96645e-07	2.16776e-05	7.5	45	-0.221093	0.285532	-0.774318	0.438743	NA	chr2	175084501	175088501	27.9661	40
NA	ENSMUSG00000089791	1.97973	2.96677e-07	2.16776e-05	217.6	48.7	0.158217	0.283937	0.557227	0.577372	NA	chr1	98455768	98459768	68.644	61
Ptpn13	ENSMUSG00000034573	2.42222	2.9821e-07	2.17028e-05	158.3	26.9	-0.00712538	0.269455	-0.0264437	0.978903	0.997464	chr5	103423192	103427192	177.853	167
Efnb3	ENSMUSG00000003934	-3.42296	3.09644e-07	2.22688e-05	1	54.5	-1.2362	0.251649	-4.91237	8.99819e-07	0.00136728	chr11	69558205	69562205	248.798	738
Epha4	ENSMUSG00000026235	-2.69465	3.08071e-07	2.22688e-05	18.3	207	-0.570427	0.262707	-2.17134	0.0299052	0.626289	chr1	77513088	77517088	335.957	508
Slitrk4	ENSMUSG00000046699	2.78046	3.0852e-07	2.22688e-05	10.9	1.2	0.488606	0.270694	1.80501	0.0710729	0.824666	chrX	64274996	64278996	165.54	91
Hecw2	ENSMUSG00000042807	1.72315	3.10881e-07	2.227e-05	63.5	18.6	0.107082	0.26537	0.403521	0.686565	0.972431	chr1	54193168	54197168	499.181	384
Nuak1	ENSMUSG00000020032	2.30089	3.2535e-07	2.32155e-05	535.9	107.4	-0.118291	0.240977	-0.490878	0.623512	0.971931	chr10	84438597	84442597	1299.03	1512
Csk	ENSMUSG00000032312	2.13251	3.37719e-07	2.39933e-05	97.3	19.7	0.432555	0.262304	1.64906	0.0991358	0.883419	chr9	57651631	57655631	184.694	114
Tep1	ENSMUSG00000006281	1.73871	3.39597e-07	2.39933e-05	135.2	40.3	-0.133822	0.258878	-0.51693	0.605205	0.971931	chr14	50868560	50872560	467.487	463
Cyr61	ENSMUSG00000028195	1.98506	3.40191e-07	2.39933e-05	1654	420.2	-0.0369238	0.249904	-0.147752	0.882538	0.990253	chr3	145647981	145651981	1147.04	1233
Gbp6	ENSMUSG00000079362	-1.21216	3.46821e-07	2.43669e-05	745.3	1774.5	-0.411077	0.262763	-1.56444	0.117714	0.915039	chr5	105291695	105295695	800.166	1039
Mtmr12	ENSMUSG00000039458	1.73218	3.59869e-07	2.51867e-05	80	23.9	-0.0550212	0.254202	-0.216447	0.82864	0.982981	chr15	12203028	12207028	600.602	551
Csrnp1	ENSMUSG00000032515	2.2533	3.72348e-07	2.59606e-05	207.6	40.1	0.0214819	0.250981	0.0855918	0.931791	0.993455	chr9	119982658	119986658	576.831	499
Cemip	ENSMUSG00000052353	3.17328	3.78978e-07	2.63224e-05	9.7	0.2	0.51003	0.268337	1.9007	0.0573408	0.777362	chr7	84084502	84088502	160.068	91
Ambra1	ENSMUSG00000040506	1.97326	3.83011e-07	2.64781e-05	723.8	186.5	0.186586	0.271254	0.687867	0.491537	0.971931	chr2	91728134	91732134	332.88	229
NA	ENSMUSG00000092741	2.70604	3.84118e-07	2.64781e-05	1377.8	194.1	-0.258379	0.242734	-1.06445	0.287124	0.971931	chr13	63299283	63303283	351.804	407
Camta1	ENSMUSG00000014592	1.5199	3.94585e-07	2.70973e-05	967.3	333	-0.297436	0.258737	-1.14957	0.250322	0.971931	chr4	151859876	151863876	914.716	1048
NA	ENSMUSG00000078862	-2.03094	3.98915e-07	2.7292e-05	27.8	135.3	-0.286344	0.254206	-1.12643	0.259984	0.971931	chr2	177955297	177959297	429.454	491
Acta1	ENSMUSG00000031972	2.73825	4.11865e-07	2.80729e-05	2211.7	323.5	0.20132	0.280148	0.71862	0.472375	0.971931	chr8	123892751	123896751	4241.2	2794
Peak1	ENSMUSG00000074305	2.08881	4.21921e-07	2.86514e-05	448.2	103.5	0.0214253	0.256533	0.0835186	0.933439	0.993481	chr9	56416067	56420067	1244.89	1069
NA	ENSMUSG00000099323	-3.76838	4.29442e-07	2.90541e-05	0.9	99.2	0.0960252	0.273221	0.351456	0.725247	0.974849	chr13	108496970	108500970	228.473	188
Scara5	ENSMUSG00000022032	-3.45327	4.31177e-07	2.90639e-05	0.3	7.8	-0.326639	0.268955	-1.21447	0.224567	0.971931	chr14	65664403	65668403	113.553	152
Kalrn	ENSMUSG00000061751	2.67684	4.35721e-07	2.92622e-05	459.7	73	0.219335	0.262488	0.8356	0.40338	0.971931	chr16	34571532	34575532	207.952	155
Reck	ENSMUSG00000028476	2.95704	4.40499e-07	2.94747e-05	8	0.7	-0.341479	0.277771	-1.22935	0.218939	0.971931	chr4	43873530	43877530	94.3991	134
Edem2	ENSMUSG00000038312	1.42749	4.86769e-07	3.24519e-05	141.6	50.8	0.144123	0.263913	0.5461	0.584997	0.971931	chr2	155727475	155731475	142.283	117
Rara	ENSMUSG00000037992	2.65392	4.92524e-07	3.25976e-05	238.5	37.4	0.211544	0.256832	0.823668	0.410128	0.971931	chr11	98925818	98929818	254.467	194
Pak6	ENSMUSG00000074923	3.13176	4.90974e-07	3.25976e-05	367.6	46.3	-0.135879	0.254401	-0.534112	0.593264	0.971931	chr2	118661303	118665303	939.984	935
Cttn	ENSMUSG00000031078	2.09574	4.95983e-07	3.2708e-05	247.2	57.6	0.428408	0.247135	1.7335	0.0830063	0.86348	chr7	144469009	144473009	572.077	340
4930447A16Rik	ENSMUSG00000022288	-3.70942	5.04808e-07	3.31703e-05	0.5	39.8	-0.26335	0.280735	-0.938076	0.348205	NA	chr15	37423554	37427554	61.0169	87
Lrrc52	ENSMUSG00000040485	-2.64917	5.10854e-07	3.33325e-05	11.5	126.3	-0.528384	0.253266	-2.08628	0.0369531	0.682011	chr1	167464780	167468780	734.468	1063
Fez2	ENSMUSG00000056121	1.47105	5.10927e-07	3.33325e-05	191.4	66.8	0.0414391	0.259077	0.159949	0.872921	0.987942	chr17	78416152	78420152	586.34	487
Abca7	ENSMUSG00000035722	2.08121	5.29163e-07	3.43117e-05	136.1	31.8	-0.263989	0.254279	-1.03818	0.299184	0.971931	chr10	79994494	79998494	359.727	414
Klhl40	ENSMUSG00000074001	2.5955	5.29692e-07	3.43117e-05	112.5	16.6	-0.0325963	0.247004	-0.131967	0.895011	0.990253	chr9	121775607	121779607	1347.78	1460
Taok3	ENSMUSG00000061288	1.89294	5.64276e-07	3.62945e-05	139.5	36.6	0.132836	0.260403	0.510116	0.60997	0.971931	chr5	117118129	117122129	329.868	246
Ribc2	ENSMUSG00000022431	-3.51063	5.63053e-07	3.62945e-05	0.4	47.8	0.0723269	0.283718	0.254925	0.798781	NA	chr15	85130078	85134078	54.661	54
Ndrg4	ENSMUSG00000036564	2.48867	5.70887e-07	3.65909e-05	698.2	120	0.485384	0.273146	1.77701	0.0755665	0.83697	chr8	95674980	95678980	128.39	78
2200002D01Rik	ENSMUSG00000030587	2.56237	5.75912e-07	3.67839e-05	72.2	9.1	0.57515	0.252496	2.27785	0.0227352	0.548584	chr7	29246466	29250466	375.055	186
Etv6	ENSMUSG00000030199	1.82732	6.00134e-07	3.80648e-05	87.1	24.1	0.105748	0.256025	0.413037	0.679579	0.972431	chr6	134033700	134037700	1236.47	976
Slc9a5	ENSMUSG00000014786	2.76321	5.98224e-07	3.80648e-05	42.1	4.7	-0.00473687	0.243446	-0.0194576	0.984476	0.998008	chr8	105346843	105350843	736.152	613
Kif5a	ENSMUSG00000074657	3.17352	6.28398e-07	3.95826e-05	89.7	8.3	-0.213725	0.26864	-0.795579	0.426277	0.971931	chr10	127261348	127265348	108.08	132
Lnx2	ENSMUSG00000016520	1.65426	6.26548e-07	3.95826e-05	219.3	68.7	0.0434675	0.251878	0.172574	0.862987	0.98619	chr5	147074586	147078586	1020.84	850
Gdi1	ENSMUSG00000015291	1.24617	6.49589e-07	4.07523e-05	599.3	249.8	-0.138002	0.26264	-0.525442	0.599276	0.971931	chrX	74302998	74306998	256.062	247
Grip1	ENSMUSG00000034813	2.5635	6.5143e-07	4.07523e-05	30.7	4.3	-0.00729667	0.273541	-0.0266748	0.978719	NA	chr10	119451830	119455830	91.5253	96
BC004004	ENSMUSG00000052712	-1.67464	6.57391e-07	4.09387e-05	71.7	245.7	-0.336235	0.256994	-1.30834	0.190759	0.971931	chr17	29266788	29270788	682.246	769
Lman1l	ENSMUSG00000056271	2.55654	6.69452e-07	4.11747e-05	59.1	6.7	0.610727	0.272744	2.2392	0.0251432	0.578554	chr9	57618774	57622774	169.645	83
Lamc1	ENSMUSG00000026478	1.76646	6.67312e-07	4.11747e-05	424.5	125.6	0.133842	0.249535	0.536364	0.591707	0.971931	chr1	153330786	153334786	1086.54	836
Plscr5	ENSMUSG00000095654	-3.29169	6.68519e-07	4.11747e-05	1.9	96.3	-0.0539919	0.281822	-0.191582	0.84807	NA	chr9	92190936	92194936	59.7457	65
Ybx2	ENSMUSG00000018554	-1.83991	6.77558e-07	4.13945e-05	118.4	473.9	-0.837878	0.251042	-3.3376	0.000845039	0.11006	chr11	69933796	69937796	525.582	1022
Tfdp2	ENSMUSG00000032411	-2.33598	6.76721e-07	4.13945e-05	48.9	309.3	-0.360332	0.25833	-1.39485	0.16306	0.957872	chr9	96194275	96198275	961.883	1193
Thoc3	ENSMUSG00000025872	-3.01262	6.9059e-07	4.205e-05	0.9	15.9	-0.233038	0.269149	-0.865831	0.386583	0.971931	chr13	54466849	54470849	120.393	141
Mtmr7	ENSMUSG00000039431	-2.10772	7.33135e-07	4.44923e-05	6	36.8	-0.115693	0.277594	-0.41677	0.676847	NA	chr8	40632797	40636797	62.2881	75
Loxl3	ENSMUSG00000000693	2.96871	7.66802e-07	4.63814e-05	25.7	2.2	0.629481	0.255707	2.46172	0.0138271	0.443099	chr6	83032173	83036173	295.51	153
Ptpn12	ENSMUSG00000028771	2.09675	7.73519e-07	4.66332e-05	373.4	81.9	0.0141601	0.24228	0.0584454	0.953394	0.994414	chr5	21053911	21057911	1335.86	1190
Lrch1	ENSMUSG00000068015	2.01551	7.76216e-07	4.66419e-05	311.6	74.2	-0.236267	0.249889	-0.945486	0.344411	0.971931	chr14	74945876	74949876	1017.47	1104
Inppl1	ENSMUSG00000032737	2.4458	7.88662e-07	4.72344e-05	894.6	175.6	-0.0511566	0.243739	-0.209883	0.833759	0.983242	chr7	101836229	101840229	1091.59	1022
Cdc42ep1	ENSMUSG00000049521	2.47313	7.95958e-07	4.75155e-05	302.3	57.9	0.405997	0.258308	1.57175	0.116008	0.911962	chr15	78840624	78844624	663.99	385
Pdlim3	ENSMUSG00000031636	1.84048	8.02684e-07	4.7761e-05	488.3	129	0.152722	0.263271	0.580093	0.561852	0.971931	chr8	45883461	45887461	648.143	481
NA	ENSMUSG00000100410	-3.20348	8.07148e-07	4.78707e-05	1.5	52	-0.763202	0.261701	-2.91632	0.00354191	0.239197	chr13	99085921	99089921	367.651	676
NA	ENSMUSG00000087006	3.65707	8.23392e-07	4.86761e-05	27.1	0.5	0.728369	0.262191	2.77801	0.00546927	0.290644	chr2	93955201	93959201	469.949	193
Mvp	ENSMUSG00000030681	2.37287	8.34507e-07	4.90159e-05	146.1	28.5	0.0977951	0.242486	0.403302	0.686726	0.972431	chr7	127012621	127016621	637.05	527
Stk38l	ENSMUSG00000001630	1.81072	8.32296e-07	4.90159e-05	129.7	36.2	0.0737232	0.266496	0.276639	0.782057	0.98003	chr6	146722995	146726995	496.012	390
Erbb2	ENSMUSG00000062312	2.12115	8.42311e-07	4.93157e-05	77	16.7	0.335566	0.261794	1.28179	0.199916	0.971931	chr11	98410470	98414470	356.98	215
Car9	ENSMUSG00000028463	3.05544	8.7074e-07	5.08173e-05	64.5	4.6	0.198606	0.263182	0.754634	0.450469	0.971931	chr4	43504966	43508966	169.645	136
Elk1	ENSMUSG00000009406	-1.3489	9.08855e-07	5.28728e-05	63.5	167.1	-0.213537	0.277874	-0.768466	0.44221	0.971931	chrX	20948608	20952608	192.903	225
Rnd1	ENSMUSG00000054855	2.43878	9.20598e-07	5.32178e-05	75.6	11	0.60442	0.264223	2.28754	0.0221645	0.543187	chr15	98675461	98679461	417.23	194
Syt13	ENSMUSG00000027220	3.62591	9.23338e-07	5.32178e-05	10.1	0.1	0.427939	0.2715	1.5762	0.11498	0.909957	chr2	92913098	92917098	132.203	86
Junb	ENSMUSG00000052837	3.00999	9.23525e-07	5.32178e-05	270	35.1	-0.0015457	0.252335	-0.00612559	0.995113	0.999546	chr8	84976718	84980718	1387.92	1448
NA	ENSMUSG00000097583	-1.40843	9.35569e-07	5.37423e-05	29.8	83.3	-0.38513	0.242739	-1.58661	0.112602	0.906005	chr3	40892193	40896193	700.777	906
NA	ENSMUSG00000082277	3.71704	9.52666e-07	5.45528e-05	30.2	0.7	0.230621	0.284302	0.811181	0.417262	NA	chr16	14036861	14040861	54.661	44
NA	ENSMUSG00000065884	3.03546	9.60429e-07	5.48255e-05	659.5	85.4	0.0191835	0.282238	0.0679693	0.94581	NA	chr4	75278755	75282755	68.644	67
1700030F18Rik	ENSMUSG00000045350	-1.75103	9.65161e-07	5.4924e-05	31.4	114.3	-0.0194147	0.273056	-0.0711015	0.943317	0.994121	chr15	99965061	99969061	99.1525	103
Plcxd2	ENSMUSG00000087141	3.48072	9.70368e-07	5.50488e-05	9	0.1	0.28494	0.269953	1.05552	0.291189	0.971931	chr16	46008218	46012218	376.561	236
Slc37a1	ENSMUSG00000024036	2.43599	1.0289e-06	5.81889e-05	74.5	12.5	-0.0987984	0.279455	-0.35354	0.723684	NA	chr17	31284792	31288792	58.4745	70
Osmr	ENSMUSG00000022146	1.99992	1.1863e-06	6.68831e-05	202.9	48.9	0.5445	0.267875	2.03266	0.0420867	0.709722	chr15	6872969	6876969	478.986	230
NA	ENSMUSG00000097971	3.40165	1.22171e-06	6.86675e-05	20696.3	2490	-0.609136	0.236445	-2.57623	0.00998839	0.387411	chr17	39841013	39845013	4127.93	4541
Azin2	ENSMUSG00000028789	2.62365	1.29791e-06	7.27265e-05	56.5	8.5	0.309787	0.271395	1.14146	0.253678	0.971931	chr4	128960442	128964442	202.479	133
Hdac7	ENSMUSG00000022475	2.69641	1.31619e-06	7.35253e-05	630.3	98.6	0.197196	0.271025	0.727591	0.466864	0.971931	chr15	97842502	97846502	108.051	92
Ppfibp1	ENSMUSG00000016487	1.63399	1.39167e-06	7.7505e-05	275.2	87.3	0.170946	0.264936	0.645237	0.518774	0.971931	chr6	146886487	146890487	618.034	444
Prkab2	ENSMUSG00000038205	1.56715	1.45566e-06	8.08221e-05	284.6	96.4	0.169309	0.258603	0.654708	0.512655	0.971931	chr3	97656193	97660193	929.877	640
Col6a1	ENSMUSG00000001119	2.35439	1.53095e-06	8.47452e-05	69.3	12	-0.0972138	0.267863	-0.362923	0.716663	0.974849	chr10	76724168	76728168	181.958	184
Pxdc1	ENSMUSG00000021411	2.77089	1.66782e-06	9.20426e-05	25.1	0.9	0.435222	0.27266	1.59621	0.110443	0.903892	chr13	34651486	34655486	426.268	227
NA	ENSMUSG00000086245	-1.56214	1.68696e-06	9.28185e-05	56.2	179.2	-0.350803	0.253192	-1.38552	0.165893	0.95809	chr11	48851493	48855493	751.313	903
Dlg5	ENSMUSG00000021782	2.40701	1.69381e-06	9.28594e-05	164.4	29.9	0.586933	0.248914	2.35798	0.0183748	0.495257	chr14	24243920	24247920	600.602	305
NA	ENSMUSG00000088284	-3.59871	1.7007e-06	9.28594e-05	6.1	582.6	-0.253276	0.273949	-0.924537	0.355207	0.971931	chr9	70515200	70519200	119.025	146
Cdr2l	ENSMUSG00000050910	2.90115	1.70296e-06	9.28594e-05	34.9	4.9	0.0384613	0.265819	0.14469	0.884956	0.990253	chr11	115379916	115383916	277.149	227
NA	ENSMUSG00000089399	-3.47	1.75948e-06	9.56563e-05	10.4	465.1	-0.152025	0.282034	-0.539032	0.589865	NA	chr5	9756940	9760940	53.3898	66
Tox3	ENSMUSG00000043668	2.4446	1.79252e-06	9.68759e-05	177.7	24.4	0.193159	0.262002	0.737243	0.460974	0.971931	chr8	90346343	90350343	376.561	260
NA	ENSMUSG00000077505	-2.60954	1.79091e-06	9.68759e-05	67.5	682.5	0.125011	0.262419	0.476379	0.633804	0.971931	chr12	59132072	59136072	247.627	203
NA	ENSMUSG00000097776	-2.90563	1.8006e-06	9.70254e-05	1.3	25.5	-0.396281	0.249233	-1.59	0.111834	0.903892	chr8	28591505	28595505	906.166	1380
NA	ENSMUSG00000097961	3.61706	1.81457e-06	9.74907e-05	62.9	0.4	0.466887	0.283446	1.64718	0.099521	NA	chrX	88758312	88762312	35.5932	19
LOC101056138	ENSMUSG00000093482	-2.75677	1.86826e-06	0.00010008	23.8	333.5	-0.323881	0.27863	-1.16241	0.245071	NA	chr6	6246659	6250659	53.3898	80
Tspan9	ENSMUSG00000030352	2.16358	1.88093e-06	0.000100213	202.4	45.5	-0.0593779	0.241631	-0.245737	0.805885	0.98087	chr6	128141594	128145594	410.438	390
Mthfr	ENSMUSG00000029009	2.02999	1.8817e-06	0.000100213	254.7	64.8	-0.0339354	0.254898	-0.133133	0.894088	0.990253	chr4	148037077	148041077	785.005	663
Gjc1	ENSMUSG00000034520	1.77158	1.93842e-06	0.000102933	116.4	33	0.027575	0.243817	0.113097	0.909953	0.990886	chr11	102817700	102821700	421.531	364
NA	ENSMUSG00000087541	-3.09911	2.10585e-06	0.000110857	1.1	64	-0.61121	0.261682	-2.3357	0.0195071	0.511787	chr5	77092532	77096532	321.694	525
NA	ENSMUSG00000083827	-2.39304	2.09817e-06	0.000110857	43.7	343.2	0.556996	0.273944	2.03324	0.042028	0.709722	chr16	43182573	43186573	175.117	91
Gm16793	ENSMUSG00000097357	-2.45678	2.10544e-06	0.000110857	5.7	103.1	-0.0166159	0.233985	-0.071013	0.943387	0.994121	chr8	35586972	35590972	889.447	828
Rbfox1	ENSMUSG00000008658	-2.06874	2.11584e-06	0.000111063	54.5	263.1	0.147942	0.283858	0.521183	0.602239	NA	chr16	5883355	5887355	50.8474	45
Des	ENSMUSG00000026208	2.23933	2.23087e-06	0.000116432	6012.7	1310	-0.271497	0.250012	-1.08593	0.277508	0.971931	chr1	75358329	75362329	1228.77	1643
Krt222	ENSMUSG00000035849	-2.25977	2.22926e-06	0.000116432	9.1	57	-0.360418	0.270545	-1.33219	0.182798	0.971931	chr11	99242085	99246085	322.337	385
Frem2	ENSMUSG00000037016	2.3046	2.255e-06	0.000117356	167	29.8	0.0318356	0.257344	0.123708	0.901546	0.990886	chr3	53655355	53659355	855.756	713
Anxa4	ENSMUSG00000029994	1.93111	2.29062e-06	0.000118871	664.2	168.9	-0.00463931	0.251876	-0.018419	0.985305	0.99819	chr6	86791584	86795584	440.547	386
Ier3	ENSMUSG00000003541	2.28509	2.33145e-06	0.000120587	543.1	109.2	-0.228754	0.251057	-0.911166	0.362208	0.971931	chr17	35819684	35823684	987.152	1074
Antxr1	ENSMUSG00000033420	2.11066	2.33689e-06	0.000120587	27.7	6	0.119374	0.271506	0.439673	0.660174	0.972431	chr6	87333821	87337821	173.749	141
Mmab	ENSMUSG00000029575	-1.51611	2.36763e-06	0.000121829	18.4	54.7	-0.348828	0.25189	-1.38484	0.166101	0.95809	chr5	114442060	114446060	244.012	289
NA	ENSMUSG00000071637	3.44759	2.39357e-06	0.000122818	29.9	2.3	0.27524	0.251524	1.09429	0.273829	0.971931	chr16	15885286	15889286	1071.38	717
NA	ENSMUSG00000049740	-3.4633	2.42254e-06	0.000123957	0.4	29.9	-0.124493	0.276631	-0.450034	0.652686	NA	chr7	107623161	107627161	66.1016	79
NA	ENSMUSG00000100550	-3.38408	2.48895e-06	0.00012699	0.5	36	-0.657317	0.268638	-2.44685	0.0144111	0.449278	chr10	95334276	95338276	534.005	851
Idh2	ENSMUSG00000030541	-1.62193	2.49573e-06	0.00012699	200.9	684.1	-0.269364	0.244036	-1.10379	0.269684	0.971931	chr7	80113392	80117392	1137.01	1518
Enah	ENSMUSG00000022995	2.32599	2.54385e-06	0.000129079	2637.1	540.7	0.141943	0.258117	0.549918	0.582375	0.971931	chr1	182017990	182021990	1398.18	1060
NA	ENSMUSG00000080976	3.00182	2.62509e-06	0.000132833	324.7	34.4	0.335973	0.258764	1.29837	0.194159	0.971931	chr11	87302673	87306673	207.952	142
Nacad	ENSMUSG00000041073	2.89246	2.66068e-06	0.000134261	80.1	9.9	-0.237157	0.258486	-0.917484	0.358889	0.971931	chr11	6604053	6608053	253.049	268
Fgf18	ENSMUSG00000057967	3.09532	2.69108e-06	0.000135422	118.8	10.7	0.234997	0.247483	0.949549	0.342341	0.971931	chr11	33145400	33149400	503.935	356
P2rx6	ENSMUSG00000022758	-2.34104	2.73028e-06	0.000137016	3.2	21	-0.415568	0.25941	-1.60197	0.109161	0.902689	chr16	17559885	17563885	164.172	232
Plod2	ENSMUSG00000032374	2.14642	2.77178e-06	0.000138718	371	86.8	0.00735736	0.242047	0.0303964	0.975751	0.997117	chr9	92540223	92544223	875.971	767
Vim	ENSMUSG00000026728	2.59582	2.83471e-06	0.00014148	151.8	27.6	0.340951	0.25927	1.31504	0.188495	0.971931	chr2	13571927	13575927	659.236	404
Rmrp	ENSMUSG00000088088	2.12901	2.84582e-06	0.000141647	2235.1	499.6	-0.186874	0.252864	-0.739031	0.459888	0.971931	chr4	43491058	43495058	393.006	412
NA	ENSMUSG00000088185	2.87402	2.86562e-06	0.000142245	10249.1	1691.3	-0.168223	0.262779	-0.64017	0.522062	0.971931	chr3	108552751	108556751	169.645	185
Rnf19b	ENSMUSG00000028793	2.06733	2.92026e-06	0.000144565	73.4	17.2	0.0604419	0.259651	0.232782	0.815931	0.981104	chr4	129056271	129060271	400.661	318
Synpo2l	ENSMUSG00000039376	1.95753	3.0063e-06	0.000148422	1512.5	373.1	-0.102337	0.258215	-0.396326	0.691864	0.972431	chr14	20666354	20670354	1251.71	1422
Dlgap4	ENSMUSG00000061689	1.96318	3.04786e-06	0.000150068	842.6	220.1	0.247658	0.253419	0.977267	0.328437	0.971931	chr2	156611705	156615705	210.688	158
Kcnd2	ENSMUSG00000060882	-1.25653	3.0744e-06	0.000150213	67.8	167.2	-0.802199	0.246277	-3.25731	0.00112473	0.130626	chr6	21213503	21217503	380.328	704
Zfp608	ENSMUSG00000052713	2.46829	3.0837e-06	0.000150213	301.2	54.9	0.076977	0.255205	0.301628	0.762936	0.977786	chr18	54990555	54994555	1002.31	808
Ppip5k2	ENSMUSG00000040648	-1.39526	3.08319e-06	0.000150213	403.8	1139.1	-0.0760909	0.25603	-0.297195	0.766317	0.978322	chr1	97768411	97772411	1383.62	1537
Phka2	ENSMUSG00000031295	1.2071	3.06803e-06	0.000150213	237.2	101.9	0.00952632	0.257336	0.037019	0.97047	0.996544	chrX	160500166	160504166	729.414	592
Slc39a13	ENSMUSG00000002105	2.41704	3.14126e-06	0.00015261	1111	213.5	-0.00169815	0.240568	-0.00705893	0.994368	0.999465	chr2	91068417	91072417	795.112	666
NA	ENSMUSG00000087838	-2.79949	3.17485e-06	0.000153833	2.8	90.2	-0.398706	0.279689	-1.42554	0.154002	0.94798	chr18	77804666	77808666	183.326	259
Nckap1l	ENSMUSG00000022488	2.67805	3.20673e-06	0.000154967	41	5.3	0.190947	0.275635	0.692752	0.488465	NA	chr15	103451794	103455794	88.983	76
NA	ENSMUSG00000084630	-2.80526	3.23148e-06	0.000155751	17.1	818.3	-0.0515262	0.280512	-0.183686	0.85426	NA	chr7	132056641	132060641	69.9152	79
Fndc3b	ENSMUSG00000039286	1.48822	3.26131e-06	0.000156775	444.5	154.1	-0.0907216	0.260275	-0.348561	0.727419	0.974849	chr3	27709307	27713307	589.509	553
NA	ENSMUSG00000095134	2.60284	3.33292e-06	0.000159796	1574.1	242	0.369772	0.285493	1.2952	0.19525	NA	chrY	90751057	90755057	69.9152	41
Ppfia4	ENSMUSG00000026458	2.79887	3.39288e-06	0.000162245	68.5	9.2	0.171088	0.249543	0.685605	0.492962	0.971931	chr1	134330928	134334928	519.782	386
NA	ENSMUSG00000074780	2.95735	3.42803e-06	0.000163073	110.6	10.7	0.335898	0.276678	1.21404	0.224732	0.971931	chr10	95671451	95675451	122.034	83
Crb2	ENSMUSG00000035403	-2.86694	3.42576e-06	0.000163073	0.2	5.1	0.0250798	0.27204	0.0921917	0.926546	NA	chr2	37774249	37778249	88.983	91
Ccdc127	ENSMUSG00000021578	-1.92049	3.46696e-06	0.000164336	19.6	87.8	-0.2729	0.260967	-1.04572	0.295688	0.971931	chr13	74348309	74352309	527.706	594
4933416C03Rik	ENSMUSG00000074734	3.64367	3.47258e-06	0.000164336	13.5	0.3	0.220694	0.285436	0.773182	0.439414	NA	chr10	116111917	116115917	53.3898	45
Dock9	ENSMUSG00000025558	1.95608	3.4852e-06	0.000164507	221.6	56.1	-0.263854	0.264292	-0.998342	0.318113	0.971931	chr14	121795837	121799837	161.436	195
Usp53	ENSMUSG00000039701	2.18783	3.53844e-06	0.000166589	267.4	58.9	0.0476733	0.255908	0.186291	0.852216	0.984959	chr3	122982510	122986510	586.34	488
Fbn1	ENSMUSG00000027204	1.80288	3.57644e-06	0.000167946	37.2	9.4	-0.269806	0.263928	-1.02227	0.306652	0.971931	chr2	125505993	125509993	135.442	166
Mt2	ENSMUSG00000031762	3.1701	3.60791e-06	0.000168557	509	45.7	0.202248	0.258683	0.781836	0.434311	0.971931	chr8	94170664	94174664	491.258	362
Rab27b	ENSMUSG00000024511	3.42861	3.602e-06	0.000168557	3.1	0.1	0.3076	0.278734	1.10356	0.269783	NA	chr18	70139605	70143605	78.8135	59
NA	ENSMUSG00000082179	-2.1231	3.66113e-06	0.000170607	11.6	58.7	0.0122911	0.285021	0.0431234	0.965603	NA	chr4	80000331	80004331	45.7627	47
Sh3rf3	ENSMUSG00000037990	3.1058	3.72085e-06	0.000172729	36.7	4.3	0.309344	0.268663	1.15142	0.249561	0.971931	chr10	58811359	58815359	164.172	114
Adamts1	ENSMUSG00000022893	1.97903	3.72559e-06	0.000172729	73.7	18.5	-0.0844779	0.250825	-0.3368	0.736268	0.97486	chr16	85801113	85805113	961.883	900
Slc38a2	ENSMUSG00000022462	1.16711	3.77426e-06	0.000174543	1718.6	763.3	-0.146256	0.257252	-0.568534	0.569673	0.971931	chr15	96697730	96701730	788.374	779
Inpp5j	ENSMUSG00000034570	1.90231	3.80196e-06	0.00017538	832.2	223.6	0.0199681	0.25672	0.0777816	0.938002	0.993657	chr11	3502821	3506821	663.99	563
2310015A10Rik	ENSMUSG00000097729	-1.98443	3.83003e-06	0.000175787	60.7	288.6	-0.325384	0.253107	-1.28556	0.198598	0.971931	chr12	80130844	80134844	1243.11	1751
Sh3tc1	ENSMUSG00000036553	2.72995	3.8289e-06	0.000175787	21.9	2.9	0.050553	0.256968	0.196728	0.84404	0.98466	chr5	35737987	35741987	225.737	205
Fgl2	ENSMUSG00000039899	2.91859	3.90117e-06	0.000178603	182	24.4	0.444826	0.256083	1.73704	0.0823808	0.859567	chr5	21370642	21374642	771.75	442
NA	ENSMUSG00000095648	-2.57754	3.94455e-06	0.000180138	2.6	30.5	-0.34755	0.245476	-1.41582	0.156829	NA	chr2	176147825	176151825	5.08474	17
Syk	ENSMUSG00000021457	2.37526	3.99204e-06	0.000181852	493.3	90.5	0.22094	0.248748	0.888207	0.374429	0.971931	chr13	52581173	52585173	945.038	680
Fam163b	ENSMUSG00000009216	3.11793	4.14321e-06	0.000188269	55.2	6.5	0.0655415	0.273592	0.23956	0.810672	NA	chr2	27140491	27144491	87.7118	85
Arhgdia	ENSMUSG00000025132	2.12465	4.1771e-06	0.000189338	295.9	65.1	0.192206	0.248847	0.772384	0.439887	0.971931	chr11	120579624	120583624	537.214	395
Ctdp1	ENSMUSG00000033323	2.18965	4.25282e-06	0.000192293	146.7	32.2	0.0154265	0.257408	0.0599299	0.952211	0.994275	chr18	80467695	80471695	475.411	411
Adpgk	ENSMUSG00000025236	2.18067	4.31237e-06	0.000194504	140.2	27.7	-0.132077	0.26338	-0.501469	0.616041	0.971931	chr9	59289558	59293558	421.531	410
Slc16a8	ENSMUSG00000032988	-3.22118	4.37555e-06	0.000196867	0.4	12	-0.27753	0.268382	-1.03409	0.301096	0.971931	chr15	79252761	79256761	87.7118	122
Myo7a	ENSMUSG00000030761	3.00698	4.5066e-06	0.000201934	14.3	1.4	0.38792	0.268613	1.44416	0.148695	0.94413	chr7	98117524	98121524	154.596	97
Frmd5	ENSMUSG00000027238	-1.9973	4.51027e-06	0.000201934	193.8	922.3	-0.196328	0.266459	-0.736806	0.46124	0.971931	chr2	121805087	121809087	92.7965	118
Rxfp1	ENSMUSG00000034009	-3.02486	4.53841e-06	0.000202697	0.6	26.7	-0.121438	0.275846	-0.440239	0.659764	NA	chr3	79735880	79739880	73.7287	85
Qsox1	ENSMUSG00000033684	1.59332	4.57771e-06	0.000203954	394.6	130.9	0.355345	0.266896	1.3314	0.183058	0.971931	chr1	155810889	155814889	770.165	455
Fstl3	ENSMUSG00000020325	3.13574	4.61738e-06	0.000205221	16.2	0.4	0.55314	0.270418	2.0455	0.0408051	0.707796	chr10	79775272	79779272	277.725	144
Ecm1	ENSMUSG00000028108	2.1857	4.63302e-06	0.000205416	403.5	86.1	0.24654	0.240357	1.02572	0.305022	0.971931	chr3	95737569	95741569	516.613	368
Fgd4	ENSMUSG00000022788	-2.32899	4.68138e-06	0.000206558	40.8	317.1	-0.220061	0.264749	-0.831207	0.405856	0.971931	chr16	16598549	16602549	143.651	169
Pfkfb3	ENSMUSG00000026773	2.3254	4.67757e-06	0.000206558	37.2	4.3	-0.10011	0.261894	-0.382253	0.702274	0.974839	chr2	11552077	11556077	168.277	173
Tnfrsf23	ENSMUSG00000037613	2.14698	4.73529e-06	0.000208432	28.8	5.7	0.156633	0.267625	0.585271	0.558366	0.971931	chr7	143683872	143687872	217.528	170
Pdlim7	ENSMUSG00000021493	1.86094	4.79946e-06	0.000210749	858.6	209.3	0.253725	0.246822	1.02797	0.303965	0.971931	chr13	55511676	55515676	576.831	408
Fn3k	ENSMUSG00000025175	-2.372	4.87423e-06	0.000212221	11.8	91	-0.350533	0.23362	-1.50044	0.1335	0.935085	chr11	121432913	121436913	747.944	932
Adamtsl5	ENSMUSG00000043822	1.33952	4.85145e-06	0.000212221	2428	944.9	-0.0210862	0.242658	-0.0868969	0.930753	0.993455	chr10	80346412	80350412	1064.64	968
Lrrc15	ENSMUSG00000052316	-2.34575	4.87408e-06	0.000212221	11.2	84.9	-0.021922	0.271877	-0.080632	0.935735	0.993657	chr16	30281256	30285256	121.761	123
NA	ENSMUSG00000059040	1.88599	4.87945e-06	0.000212221	716.8	187.7	-0.035423	0.284384	-0.124561	0.900871	NA	chr18	48043335	48047335	57.2033	65
Gpc4	ENSMUSG00000031119	2.04923	4.94301e-06	0.000214475	63.7	13.7	-0.206028	0.270205	-0.762486	0.44577	0.971931	chrX	52163252	52167252	326.855	333
NA	ENSMUSG00000097187	2.94728	5.00536e-06	0.000215136	297	29.4	0.350794	0.254272	1.3796	0.167709	0.95892	chr2	84741655	84745655	530.875	331
Gabbr1	ENSMUSG00000024462	1.90178	4.98139e-06	0.000215136	100.2	27	-0.240084	0.259887	-0.9238	0.355591	0.971931	chr17	37043966	37047966	128.602	156
Ier5	ENSMUSG00000056708	2.40554	4.99475e-06	0.000215136	113.4	21.3	-0.0559388	0.250422	-0.223378	0.823241	0.982287	chr1	155097636	155101636	771.528	663
App	ENSMUSG00000022892	2.25119	4.99638e-06	0.000215136	271.7	61	0.0328879	0.262349	0.125359	0.900239	0.990763	chr16	85171766	85175766	370.536	299
Evl	ENSMUSG00000021262	2.94203	5.01898e-06	0.000215215	76.3	10.4	-0.333663	0.264566	-1.26117	0.207247	0.971931	chr12	108552720	108556720	139.546	182
Gm22	ENSMUSG00000043903	2.75259	5.11168e-06	0.000218677	329.9	55.6	0.0942994	0.263678	0.357631	0.72062	0.974849	chr8	122256620	122260620	136.81	122
Wsb1	ENSMUSG00000017677	2.14194	5.31384e-06	0.000226794	103.2	21.4	-0.120438	0.254336	-0.473539	0.635829	0.971931	chr11	79252671	79256671	323.843	307
NA	ENSMUSG00000090185	-2.37675	5.54769e-06	0.000236223	200.9	1826.2	-0.158112	0.243846	-0.648411	0.516719	0.971931	chr12	103334906	103338906	919.769	972
Mmp15	ENSMUSG00000031790	-2.08562	5.5747e-06	0.000236821	15.9	92.9	-0.656543	0.239507	-2.74122	0.00612111	0.301655	chr8	95350268	95354268	758.052	1231
Dysf	ENSMUSG00000033788	2.0298	5.63135e-06	0.000238672	947	226.4	-0.0800548	0.252296	-0.317306	0.751012	0.977354	chr6	84006590	84010590	1162.82	1299
Zfp462	ENSMUSG00000060206	2.17606	5.70054e-06	0.000241046	191.6	43.7	-0.148473	0.258264	-0.574886	0.565368	0.971931	chr4	54943048	54947048	198.375	213
NA	ENSMUSG00000064193	1.9008	5.87707e-06	0.000247937	507.5	133.9	-0.124186	0.283154	-0.438582	0.660965	NA	chr2	80835141	80839141	55.9322	70
Malt1	ENSMUSG00000032688	1.50706	6.03975e-06	0.000254212	646.7	224.4	0.207002	0.263213	0.786443	0.431608	0.971931	chr18	65428938	65432938	736.886	510
Best3	ENSMUSG00000020169	2.38789	6.09535e-06	0.000255963	640.1	132.8	-0.143672	0.26844	-0.53521	0.592505	0.971931	chr10	116984314	116988314	462.733	454
NA	ENSMUSG00000086712	-3.22049	6.12767e-06	0.00025673	0.3	24.6	0.483654	0.268051	1.80434	0.0711784	0.824666	chr4	53268232	53272232	132.203	84
Cep164	ENSMUSG00000043987	2.75074	6.18588e-06	0.000258575	167.4	26.8	-0.310666	0.27039	-1.14895	0.250575	0.971931	chr9	45826691	45830691	181.958	230
Ppargc1a	ENSMUSG00000029167	-1.84979	6.24682e-06	0.000259933	891.3	3620.6	-0.475863	0.259135	-1.83636	0.0663051	0.80897	chr5	51565726	51569726	854.071	1186
Hivep3	ENSMUSG00000028634	2.42985	6.23551e-06	0.000259933	263.8	50.5	-0.223182	0.265085	-0.841925	0.39983	0.971931	chr4	119731784	119735784	349.449	361
Ptk2b	ENSMUSG00000059456	2.78695	6.28992e-06	0.000261132	66.7	8.9	0.496614	0.265706	1.86904	0.0616179	0.793674	chr14	66279052	66283052	305.087	169
4930523C07Rik	ENSMUSG00000090394	1.88592	6.30629e-06	0.000261218	150	39.1	-0.155558	0.243768	-0.638139	0.523383	0.971931	chr1	160042382	160046382	970.306	992
Troap	ENSMUSG00000032783	3.56689	6.41471e-06	0.000265108	9.6	0.1	-0.243341	0.26117	-0.931735	0.351474	0.971931	chr15	99072575	99076575	145.019	174
Ptprf	ENSMUSG00000033295	2.45943	6.48279e-06	0.000266746	245	42.9	0.326144	0.267242	1.22041	0.222311	0.971931	chr4	118289405	118293405	228.473	152
Adamts2	ENSMUSG00000036545	2.01795	6.48356e-06	0.000266746	64.9	13.6	0.251932	0.264126	0.95383	0.34017	0.971931	chr11	50600084	50604084	223.001	162
Thbd	ENSMUSG00000074743	-2.87714	6.6002e-06	0.000270934	0.3	10	-0.00711017	0.250138	-0.028425	0.977323	0.997427	chr2	148406188	148410188	440.547	388
Fbxl16	ENSMUSG00000025738	3.45519	6.70464e-06	0.000274605	6.4	0.1	-0.0459983	0.272955	-0.16852	0.866174	0.986341	chr17	25807085	25811085	101.695	112
Tmem179	ENSMUSG00000054013	-1.96501	6.73022e-06	0.000275036	33.6	172.7	0.13318	0.267919	0.497091	0.619125	0.971931	chr12	112514747	112518747	115.678	103
Ppp1r3fos	ENSMUSG00000039545	-1.948	6.7882e-06	0.000276786	4.6	22.2	-0.268663	0.27125	-0.990463	0.321948	0.971931	chrX	7571600	7575600	87.7118	119
LOC102639045	ENSMUSG00000086324	2.67898	6.91314e-06	0.000281252	27814.5	3883.9	0.0329557	0.256536	0.128464	0.897782	0.990253	chr16	35981230	35985230	727.729	575
Abca12	ENSMUSG00000050296	-2.48778	6.94949e-06	0.000282103	1.4	16.4	-0.321212	0.274733	-1.16918	0.242333	NA	chr1	71412910	71416910	68.644	103
Slc7a6	ENSMUSG00000031904	1.53588	7.00739e-06	0.000283823	138.9	47.9	0.266858	0.258202	1.03352	0.30136	0.971931	chr8	106166857	106170857	429.28	278
Gm766	ENSMUSG00000048473	-3.64149	7.06613e-06	0.000285569	0	9.4	-0.341324	0.282478	-1.20832	0.226924	0.971931	chr6	142802502	142806502	76.2711	120
Alkbh7	ENSMUSG00000002661	-2.6503	7.14512e-06	0.000288123	2.4	51.5	-0.368477	0.2528	-1.45758	0.144955	0.942087	chr17	56995339	56999339	472.241	594
Stk39	ENSMUSG00000027030	-1.31794	7.18913e-06	0.00028926	207.5	547	-0.328566	0.256853	-1.2792	0.200826	0.971931	chr2	68470268	68474268	527.706	624
Ssh1	ENSMUSG00000042121	2.14166	7.22637e-06	0.000290119	109	23.9	0.0833806	0.250929	0.332288	0.739672	0.975012	chr5	113991894	113995894	494.427	399
NA	ENSMUSG00000095562	3.04487	7.3206e-06	0.000293129	47264.6	7887.3	-0.164457	0.263555	-0.623993	0.532632	0.971931	chrX	170007659	170011659	177.853	201
Pmepa1	ENSMUSG00000038400	1.68985	7.33344e-06	0.000293129	88.5	27.9	0.083183	0.245514	0.338811	0.734752	0.97486	chr2	173274533	173278533	891.132	723
Mfsd10	ENSMUSG00000001082	2.57509	7.38341e-06	0.000294482	64.2	9.7	0.0902616	0.258752	0.348835	0.727213	0.974849	chr5	34635212	34639212	248.995	214
Plxnb1	ENSMUSG00000053646	-1.62053	7.42402e-06	0.000294814	66	221.2	-0.619437	0.242073	-2.55888	0.0105009	0.394862	chr9	109093389	109097389	440.547	686
Leng8	ENSMUSG00000035545	1.24587	7.41892e-06	0.000294814	4550.6	1914.7	-0.027212	0.25841	-0.105305	0.916133	0.991155	chr7	4135039	4139039	503.935	453
Tgm2	ENSMUSG00000037820	1.91083	7.44327e-06	0.000294938	1085.5	279.1	0.110867	0.249292	0.444726	0.656518	0.972431	chr2	158144436	158148436	889.447	703
Parp3	ENSMUSG00000023249	1.49262	7.46202e-06	0.00029504	510.9	174.9	-0.219562	0.244142	-0.899323	0.368481	0.971931	chr9	106474949	106478949	1014.1	1129
Klhl33	ENSMUSG00000090799	-2.95492	7.61441e-06	0.000300416	2.2	73.1	-0.871785	0.252178	-3.45702	0.000546182	0.085056	chr14	50895507	50899507	466.623	959
Col4a2	ENSMUSG00000031503	2.00267	7.66777e-06	0.000301869	649.6	155.5	0.110415	0.239873	0.460309	0.645295	0.971931	chr8	11310805	11314805	1315.64	1068
Ppil1	ENSMUSG00000024007	-2.44066	7.80353e-06	0.000306553	4.7	47.5	-0.442498	0.267803	-1.65233	0.0984675	0.883419	chr17	29262186	29266186	228.949	300
Ppm1l	ENSMUSG00000027784	-2.0039	7.82926e-06	0.000306904	5.1	25.4	-0.31173	0.247004	-1.26204	0.206933	0.971931	chr3	69314861	69318861	810.273	961
Gipr	ENSMUSG00000030406	2.86594	7.87459e-06	0.00030802	33.4	2.1	-0.31119	0.25968	-1.19836	0.230777	0.971931	chr7	19164127	19168127	230.456	264
Cd4	ENSMUSG00000023274	3.1697	8.20005e-06	0.000319382	6.4	0.4	-0.364356	0.258737	-1.40821	0.159069	0.954568	chr6	124886221	124890221	127.234	174
NA	ENSMUSG00000073590	-1.74462	8.29329e-06	0.000321642	9.7	35.1	-0.392351	0.260227	-1.50773	0.131624	0.935085	chr18	37653451	37657451	251.543	309
NA	ENSMUSG00000081995	-3.30604	8.28269e-06	0.000321642	0.8	50.5	-0.261909	0.271176	-0.965829	0.33413	0.971931	chr11	107328708	107332708	108.08	132
NA	ENSMUSG00000097993	3.40064	8.35425e-06	0.000322636	4.3	0.4	0.118911	0.263748	0.45085	0.652098	0.971931	chr1	135130594	135134594	181.958	153
Myo1d	ENSMUSG00000035441	1.427	8.35004e-06	0.000322636	69.2	24.7	-0.0177356	0.263735	-0.0672479	0.946384	0.994275	chr11	80778025	80782025	217.528	204
Thbs1	ENSMUSG00000040152	2.33068	8.58717e-06	0.000330932	43.4	7.3	0.366094	0.274686	1.33277	0.182606	0.971931	chr2	118109876	118113876	227.105	140
NA	ENSMUSG00000082460	2.74592	8.66496e-06	0.000333227	126.8	10.9	0.0630803	0.284868	0.221437	0.824752	NA	chr2	83536675	83540675	45.7627	44
Hps1	ENSMUSG00000025188	1.64064	8.73383e-06	0.00033517	37.5	10.9	0.0135548	0.267416	0.0506879	0.959574	0.995102	chr19	42777978	42781978	140.915	130
Fgfr1	ENSMUSG00000031565	1.88669	8.7738e-06	0.000335998	192.4	51	-0.103406	0.266332	-0.388261	0.697823	0.973963	chr8	25511654	25515654	176.485	181
Nfkb2	ENSMUSG00000025225	1.71919	8.99314e-06	0.000343677	66.6	19.2	-0.0456049	0.257551	-0.177072	0.859452	0.986068	chr19	46302320	46306320	580.001	524
Ell2	ENSMUSG00000001542	1.2698	9.12105e-06	0.000347838	188.7	74.7	-0.0443294	0.241315	-0.183699	0.854249	0.985084	chr13	75704757	75708757	813.642	747
NA	ENSMUSG00000070170	-3.12614	9.16564e-06	0.00034881	4.2	192.9	-0.286488	0.277455	-1.03256	0.30181	NA	chr13	75903147	75907147	61.0169	84
Sulf2	ENSMUSG00000006800	1.60933	9.18731e-06	0.000348908	353.9	107.4	0.259783	0.250033	1.03899	0.298808	0.971931	chr2	166153663	166157663	975.36	666
Hspe1	ENSMUSG00000073676	-2.73181	9.40444e-06	0.000355529	4.4	93	-0.223963	0.239919	-0.933493	0.350565	0.971931	chr1	55086132	55090132	864.179	931
NA	ENSMUSG00000072847	-2.16961	9.42005e-06	0.000355529	4.1	22.6	-0.0823938	0.275643	-0.298915	0.765005	NA	chr11	61866058	61870058	76.2711	88
NA	ENSMUSG00000095545	-2.55234	9.40574e-06	0.000355529	2.7	33.5	-0.688975	0.266956	-2.58085	0.0098557	NA	chr2	175701646	175705646	5.08474	27
Lmna	ENSMUSG00000028063	1.58684	9.51284e-06	0.000358291	248.1	80.9	0.0336561	0.242625	0.138716	0.889674	0.990253	chr3	88507956	88511956	431.039	369
Erdr1	ENSMUSG00000096768	3.00182	9.61655e-06	0.000361452	45045.3	7818.2	-0.00138441	0.26179	-0.00528823	0.995781	0.999546	chrY	90782738	90786738	192.903	183
Zyx	ENSMUSG00000029860	1.87077	9.64042e-06	0.000361605	391.6	106.7	0.0459894	0.250767	0.183395	0.854488	0.985174	chr6	42347630	42351630	916.4	766
Ptpn18	ENSMUSG00000026126	-1.53733	9.73011e-06	0.000364221	9.3	30	-0.743457	0.264555	-2.81021	0.0049509	0.274648	chr1	34457762	34461762	177.737	312
NA	ENSMUSG00000053613	-3.07236	9.77918e-06	0.00036531	0.2	13.6	0.312815	0.258814	1.20865	0.226798	0.971931	chr11	120657157	120661157	198.375	139
Spire1	ENSMUSG00000024533	2.60557	9.89016e-06	0.000368701	15.5	1.8	0.103472	0.266954	0.387602	0.69831	0.973963	chr18	67608790	67612790	135.442	114
Gpr183	ENSMUSG00000051212	-2.11623	9.97521e-06	0.000371115	1.8	20.3	-0.040613	0.262861	-0.154504	0.877213	0.98873	chr14	121963195	121967195	197.007	192
NA	ENSMUSG00000090093	-2.06807	1.01356e-05	0.000376315	18.2	102.4	-0.359005	0.277205	-1.29509	0.195289	NA	chr2	175140012	175144012	72.4576	109
Thap7	ENSMUSG00000022760	2.96787	1.01871e-05	0.000377458	96.9	14.7	-0.0274173	0.261365	-0.1049	0.916455	0.991155	chr16	17529136	17533136	262.087	227
Ankrd10	ENSMUSG00000031508	1.48645	1.02582e-05	0.000379327	342.8	122.6	-0.0372715	0.243994	-0.152756	0.878591	0.988788	chr8	11633757	11637757	1141.31	1242
NA	ENSMUSG00000089756	-2.4054	1.0312e-05	0.000380544	2.5	26	-0.407724	0.278296	-1.46507	0.142901	NA	chr2	175929100	175933100	20.339	41
Scn5a	ENSMUSG00000032511	2.53233	1.03399e-05	0.000380803	4170.3	770.2	-0.0942035	0.249325	-0.377835	0.705553	0.974839	chr9	119577016	119581016	886.078	857
Kif21b	ENSMUSG00000041642	2.9224	1.0503e-05	0.000386032	15.5	1.8	0.585834	0.259434	2.25813	0.0239377	0.564656	chr1	136129389	136133389	255.835	137
Scube2	ENSMUSG00000007279	1.93597	1.05625e-05	0.00038744	170.1	46.9	0.156143	0.255886	0.610205	0.541726	0.971931	chr7	109863679	109867679	183.326	148
Epb4.1l1	ENSMUSG00000027624	2.44087	1.06139e-05	0.000388547	16.5	2.6	0.14286	0.272443	0.524367	0.600023	0.971931	chr2	156418909	156422909	105.508	94
Ypel2	ENSMUSG00000018427	-1.74775	1.07091e-05	0.000391247	23.3	95.3	-0.334635	0.248866	-1.34464	0.178742	0.971931	chr11	86991707	86995707	852.387	1022
A930011G23Rik	ENSMUSG00000089809	-2.63979	1.08224e-05	0.000394596	2.6	62.4	-0.466454	0.262904	-1.77424	0.0760232	0.838295	chr5	99727065	99731065	116.289	179
Dok3	ENSMUSG00000035711	-2.8734	1.09018e-05	0.000396698	0.5	19	0.199213	0.260248	0.765476	0.443988	0.971931	chr13	55527296	55531296	150.491	118
NA	ENSMUSG00000080850	-2.31075	1.09688e-05	0.000398343	49.1	430.1	-0.0524628	0.256661	-0.204405	0.838037	0.983946	chr4	48673156	48677156	155.964	157
Pla2g5	ENSMUSG00000041193	-2.71288	1.10487e-05	0.000400449	0.5	8.4	-0.0131004	0.280085	-0.0467727	0.962694	NA	chr4	138861482	138865482	66.1016	70
Tnfrsf21	ENSMUSG00000023915	2.71058	1.11462e-05	0.000403183	56.9	9.3	-0.177448	0.269257	-0.659028	0.509878	0.971931	chr17	43014555	43018555	120.393	136
Bcl6	ENSMUSG00000022508	2.10617	1.12459e-05	0.000405986	824.4	189.3	-0.082397	0.257604	-0.319859	0.749075	0.977354	chr16	23986852	23990852	1597.26	1783
Tox2	ENSMUSG00000074607	3.27971	1.13438e-05	0.000408711	34.8	4.2	-0.118478	0.276279	-0.428836	0.668043	0.972431	chr2	163201125	163205125	90.2542	110
Sh3gl1	ENSMUSG00000003200	1.86871	1.13769e-05	0.000409097	264.8	70.3	0.0754952	0.274025	0.275505	0.782929	0.98003	chr17	56034635	56038635	412.711	311
Klc1	ENSMUSG00000021288	2.0262	1.15824e-05	0.000415669	1446.7	358.8	0.324322	0.248068	1.30739	0.19108	0.971931	chr12	111756849	111760849	855.756	528
Muc15	ENSMUSG00000050808	3.32328	1.16585e-05	0.000416089	3.9	0.2	1.42534	0.275445	5.17467	2.28308e-07	0.000462553	chr2	110719340	110723340	305.087	59
Zscan18	ENSMUSG00000070822	2.9173	1.16541e-05	0.000416089	37.3	4.3	0.687135	0.263258	2.61013	0.00905088	0.363511	chr7	12801635	12805635	202.479	95
NA	ENSMUSG00000081320	-3.19323	1.16624e-05	0.000416089	0.8	42.7	0.0713549	0.285551	0.249885	0.802676	NA	chrX	49156223	49160223	41.9491	41
Lrp1b	ENSMUSG00000049252	-2.64535	1.16858e-05	0.00041611	0.6	6.8	0.427912	0.285538	1.49861	0.133974	NA	chr2	42651624	42655624	52.1186	30
NA	ENSMUSG00000087190	-3.14787	1.1834e-05	0.000420567	0.2	12.3	-0.19157	0.250097	-0.76598	0.443688	0.971931	chr16	91929237	91933237	570.493	600
1700025G04Rik	ENSMUSG00000032666	2.07238	1.19273e-05	0.000423061	415.1	94.9	0.182858	0.244316	0.748451	0.454188	0.971931	chr1	152088125	152092125	860.81	598
Lhfp	ENSMUSG00000048332	1.51383	1.19594e-05	0.000423375	42	13.8	0.140082	0.240715	0.581939	0.560608	0.971931	chr3	53039528	53043528	988.836	780
Hdac6	ENSMUSG00000031161	1.98576	1.21473e-05	0.000428755	74.9	19.3	-0.306902	0.278341	-1.10261	0.270195	0.971931	chrX	7945889	7949889	179.221	227
NA	ENSMUSG00000074876	3.01489	1.21583e-05	0.000428755	47.5	7	-0.254767	0.269084	-0.946794	0.343744	0.971931	chr2	122628646	122632646	147.755	185
Myl7	ENSMUSG00000020469	-3.58947	1.22396e-05	0.000430793	0.2	25.7	0.113194	0.268065	0.422262	0.672834	0.972431	chr11	5896782	5900782	128.602	109
NA	ENSMUSG00000056753	-2.30451	1.22693e-05	0.000431005	2.2	28.9	-0.380091	0.252731	-1.50394	0.132598	0.935085	chr8	84065287	84069287	902.924	1147
Myo9a	ENSMUSG00000039585	1.57195	1.23213e-05	0.000432004	149.5	48.8	0.0266667	0.250124	0.106614	0.915096	0.990886	chr9	59748896	59752896	845.649	677
NA	ENSMUSG00000065594	-2.92043	1.26364e-05	0.000441357	5.3	317.5	-0.292368	0.25362	-1.15278	0.249	0.971931	chr19	34818773	34822773	172.381	217
Cnst	ENSMUSG00000038949	-1.09217	1.26286e-05	0.000441357	224.5	495.7	-0.0828278	0.247829	-0.334214	0.738218	0.97486	chr1	179544370	179548370	1046.11	1007
Npr3	ENSMUSG00000022206	1.98085	1.27756e-05	0.000445365	30.6	6.8	0.0733607	0.261551	0.280483	0.779107	0.98003	chr15	11905287	11909287	402.168	314
Dhcr24	ENSMUSG00000034926	3.36308	1.31317e-05	0.000456827	8.2	0.1	0.191311	0.261369	0.731958	0.464194	0.971931	chr4	106559038	106563038	151.859	119
Cilp	ENSMUSG00000042254	2.87498	1.31544e-05	0.000456827	3.7	0.1	0.173504	0.275531	0.629708	0.528886	NA	chr9	65263180	65267180	86.4406	75
Etv5	ENSMUSG00000013089	1.80192	1.33255e-05	0.000461893	58.2	15.4	0.138773	0.254282	0.545743	0.585242	0.971931	chr16	22437719	22441719	842.28	600
Dnah5	ENSMUSG00000022262	3.46001	1.34707e-05	0.00046604	0.7	0	0.163566	0.278953	0.586357	0.557636	NA	chr15	28201752	28205752	68.644	61
Ndrg1	ENSMUSG00000005125	2.21545	1.3525e-05	0.000467034	61.4	10.5	0.332257	0.245203	1.35503	0.175409	0.969126	chr15	66967640	66971640	524.536	340
Slc16a4	ENSMUSG00000027896	-1.78109	1.36411e-05	0.000470154	15.3	59.1	0.139297	0.278982	0.499304	0.617565	NA	chr3	107289230	107293230	78.8135	70
Msln	ENSMUSG00000063011	3.10335	1.37651e-05	0.000473535	12.1	0.4	0.401668	0.267973	1.49891	0.133897	0.935085	chr17	25752378	25756378	173.749	111
Gpr56	ENSMUSG00000031785	2.68654	1.38301e-05	0.000474878	20.1	1.9	-0.0801608	0.276711	-0.289692	0.772052	NA	chr8	94972751	94976751	85.1694	98
Prune2	ENSMUSG00000039126	2.20998	1.41249e-05	0.00048409	6148.4	1433.9	-0.143528	0.263081	-0.545566	0.585364	0.971931	chr19	16954118	16958118	589.509	584
Snx9	ENSMUSG00000002365	1.41954	1.43351e-05	0.000490374	120.5	42.5	0.133453	0.244038	0.546855	0.584478	0.971931	chr17	5839329	5843329	1071.38	839
Arhgef17	ENSMUSG00000032875	2.28587	1.44993e-05	0.000494139	82.6	17.6	0.337804	0.239353	1.41132	0.15815	0.952624	chr7	100930107	100934107	519.782	345
Dtwd2	ENSMUSG00000024505	-2.4369	1.44844e-05	0.000494139	1.6	15.2	-0.346684	0.253208	-1.36916	0.170948	0.962354	chr18	49753601	49757601	503.935	619
Fitm1	ENSMUSG00000022215	-2.06576	1.4969e-05	0.000509196	12.7	66.2	-0.334881	0.244244	-1.37109	0.170347	0.962354	chr14	55573617	55577617	1049.48	1296
NA	ENSMUSG00000099484	-3.17206	1.55105e-05	0.000526637	3.3	188.2	0.459815	0.275402	1.66961	0.0949961	0.873931	chr1	107961307	107965307	128.39	79
Ppp1r18	ENSMUSG00000034595	2.14531	1.56676e-05	0.000530984	57.3	10.9	0.191017	0.260355	0.733678	0.463145	0.971931	chr17	35863593	35867593	472.241	337
Golim4	ENSMUSG00000034109	2.06887	1.57003e-05	0.000531107	113	25	0.165867	0.258104	0.642637	0.52046	0.971931	chr3	75954949	75958949	476.995	348
Clcf1	ENSMUSG00000040663	2.28747	1.59484e-05	0.000538501	86.7	18.7	0.44242	0.257789	1.71621	0.0861237	0.865223	chr19	4212238	4216238	238.05	147
NA	ENSMUSG00000085289	-2.12334	1.6018e-05	0.00053886	7.4	53.7	0.315523	0.259579	1.21552	0.224168	0.971931	chr18	39387425	39391425	350.955	219
Cdc37l1	ENSMUSG00000024780	-1.77658	1.6e-05	0.00053886	158.2	629.8	-0.0793743	0.262461	-0.302423	0.76233	0.977786	chr19	28988352	28992352	702.461	615
Sord	ENSMUSG00000027227	-2.39036	1.62225e-05	0.000544617	8.1	61.6	-0.760395	0.248753	-3.05683	0.00223694	0.193823	chr2	122232749	122236749	305.847	559
Krt80	ENSMUSG00000037185	3.0406	1.62488e-05	0.000544617	33.6	4	0.546659	0.256602	2.13038	0.0331401	0.660117	chr15	101368162	101372162	621.203	323
S1pr1	ENSMUSG00000045092	1.69094	1.63059e-05	0.00054553	43.1	12.3	0.450938	0.261435	1.72485	0.0845539	0.865149	chr3	115713072	115717072	751.149	414
Chrnb1	ENSMUSG00000041189	2.40837	1.63893e-05	0.000547319	87.9	14.9	-0.167256	0.255343	-0.655025	0.512452	0.971931	chr11	69793943	69797943	186.062	206
Ghr	ENSMUSG00000055737	-1.26448	1.64401e-05	0.000548014	290.7	731.9	-0.373314	0.244222	-1.52859	0.126367	0.929452	chr15	3581492	3585492	699.092	858
Adamts4	ENSMUSG00000006403	3.25078	1.64888e-05	0.000548636	6.5	0.2	0.354346	0.271996	1.30276	0.192656	0.971931	chr1	171248421	171252421	236.682	148
NA	ENSMUSG00000101398	-3.4082	1.66483e-05	0.000552936	0.2	18.6	-0.204931	0.272338	-0.752485	0.451759	NA	chr19	9337986	9341986	82.627	105
Cep170b	ENSMUSG00000072825	2.60282	1.70924e-05	0.000566656	142.8	24.1	-0.292309	0.27382	-1.06752	0.285736	NA	chr12	112718455	112722455	77.5423	106
Mrc2	ENSMUSG00000020695	2.66608	1.71471e-05	0.000567437	28.3	3.6	-0.0917196	0.266832	-0.343736	0.731045	0.97486	chr11	105290643	105294643	149.123	155
Bag2	ENSMUSG00000042215	1.27724	1.73772e-05	0.000570916	233.1	95	0.0621613	0.243829	0.254938	0.798771	0.980421	chr1	33755795	33759795	909.662	767
Insrr	ENSMUSG00000005640	3.37016	1.73248e-05	0.000570916	3.4	0.1	-0.391239	0.276676	-1.41407	0.157341	NA	chr3	87794951	87798951	67.3728	106
Src	ENSMUSG00000027646	3.10791	1.7372e-05	0.000570916	12.5	0.8	0.0965925	0.274218	0.352247	0.724653	NA	chr2	157416444	157420444	88.983	85
Mdga1	ENSMUSG00000043557	-1.75748	1.72891e-05	0.000570916	7.5	30.5	0.187738	0.282553	0.664437	0.506411	NA	chr17	29968087	29972087	86.4406	75
Pip4k2a	ENSMUSG00000026737	2.30325	1.74899e-05	0.000573587	27.9	5.1	0.277916	0.268954	1.03332	0.301454	0.971931	chr2	18996126	19000126	409.699	255
NA	ENSMUSG00000099694	-3.17992	1.75682e-05	0.000575121	1.1	98.1	0.368756	0.281493	1.31	0.190197	NA	chr1	43268683	43272683	72.4576	50
NA	ENSMUSG00000089417	2.05485	1.78115e-05	0.000582045	6551.3	1629.1	0.160046	0.281654	0.568236	0.569875	NA	chr3	69083447	69087447	90.2542	75
Fkbp4	ENSMUSG00000030357	-1.63025	1.79008e-05	0.000583919	26.5	94.8	-0.770975	0.255028	-3.0231	0.00250203	0.204583	chr6	128436677	128440677	495.26	915
NA	ENSMUSG00000044058	2.75145	1.81589e-05	0.000591282	72	8.4	-0.0558105	0.283413	-0.196923	0.843888	NA	chr5	78471885	78475885	54.661	63
Dbn1	ENSMUSG00000034675	3.04881	1.87254e-05	0.000608641	38.5	5.2	0.244152	0.257913	0.946644	0.34382	0.971931	chr13	55486111	55490111	201.111	153
Flt3l	ENSMUSG00000089989	1.37141	1.87685e-05	0.00060896	87.5	32.8	0.226918	0.247517	0.916776	0.35926	0.971931	chr7	45134231	45138231	265.412	204
Atn1	ENSMUSG00000004263	1.97599	1.89704e-05	0.000614419	309.4	78	-0.103157	0.250822	-0.411275	0.680871	0.972431	chr6	124754524	124758524	699.092	642
Rbfox2	ENSMUSG00000033565	1.6981	1.90074e-05	0.000614526	734.5	229.8	0.0504413	0.269619	0.187084	0.851595	0.984959	chr15	77305004	77309004	400.661	316
Chsy3	ENSMUSG00000058152	3.25566	1.91781e-05	0.000618952	4.1	0	0.349785	0.265031	1.31979	0.186906	0.971931	chr18	59173401	59177401	168.277	115
Atg13	ENSMUSG00000027244	2.02767	1.97658e-05	0.000636794	926.8	242.4	0.334293	0.2575	1.29823	0.19421	0.971931	chr2	91708576	91712576	990.521	586
Ltbp3	ENSMUSG00000024940	2.18046	1.98084e-05	0.000637041	250.6	57.6	0.394397	0.269885	1.46135	0.143919	0.942087	chr19	5738904	5742904	417.23	229
Wdr62	ENSMUSG00000037020	2.25584	1.99212e-05	0.000639544	34.3	6.9	0.359314	0.248368	1.4467	0.147982	0.94313	chr7	30278419	30282419	527.706	332
Meg3	ENSMUSG00000021268	2.18979	2.06297e-05	0.000661129	40.5	8.6	0.0740209	0.276439	0.267765	0.78888	NA	chr12	109539001	109543001	78.8135	76
Fstl1	ENSMUSG00000022816	1.51387	2.09933e-05	0.000671603	54.8	17.2	-0.33771	0.26524	-1.27322	0.202939	0.971931	chr16	37774873	37778873	134.074	177
4930556N13Rik	ENSMUSG00000092399	-2.32591	2.11116e-05	0.000674205	4.1	52.6	-0.52054	0.248644	-2.09352	0.036303	0.682011	chr11	88849604	88853604	825.434	1174
NA	ENSMUSG00000078903	-1.79383	2.14224e-05	0.000682937	9.3	39.4	-0.371877	0.275711	-1.34879	0.177404	0.970451	chr2	175204917	175208917	103.976	142
Vamp5	ENSMUSG00000073002	-2.00442	2.20526e-05	0.000699366	46.9	267.2	-0.40344	0.258046	-1.56344	0.117948	0.915039	chr6	72378468	72382468	889.447	1142
Gucy2e	ENSMUSG00000020890	-3.3643	2.20305e-05	0.000699366	0	2.3	-0.0628027	0.273796	-0.229378	0.818575	0.981104	chr11	69235036	69239036	94.0677	106
Rcan1	ENSMUSG00000022951	2.13854	2.20073e-05	0.000699366	1055.7	201.9	0.0321222	0.271117	0.118481	0.905686	0.990886	chr16	92468867	92472867	119.025	114
Trappc6a	ENSMUSG00000002043	-3.03812	2.21234e-05	0.000699412	0.4	33.1	-0.156787	0.256634	-0.610936	0.541242	0.971931	chr7	19506395	19510395	518.198	529
Angpt4	ENSMUSG00000027460	3.40925	2.21655e-05	0.000699412	5	0.1	0.316005	0.262208	1.20517	0.228138	0.971931	chr2	151909210	151913210	155.964	110
Wdr1	ENSMUSG00000005103	1.1796	2.2183e-05	0.000699412	169.1	73.6	-0.0601429	0.240887	-0.249672	0.802841	0.98044	chr5	38561221	38565221	906.293	858
NA	ENSMUSG00000086506	-2.88693	2.22072e-05	0.000699412	0.7	27.4	-0.192751	0.279726	-0.689071	0.490779	NA	chr13	55602783	55606783	57.2033	76
Pdp2	ENSMUSG00000048371	-2.66523	2.23748e-05	0.000703477	0.8	25.2	-0.8296	0.252146	-3.29016	0.00100131	0.122536	chr8	104589451	104593451	351.804	686
1700009P17Rik	ENSMUSG00000026649	-2.0908	2.24571e-05	0.000703894	7.5	38.4	0.190492	0.249949	0.762123	0.445987	0.971931	chr1	171111918	171115918	445.301	328
Ttc32	ENSMUSG00000066637	-2.3778	2.24651e-05	0.000703894	2.6	40.3	-0.313838	0.260175	-1.20626	0.227718	0.971931	chr12	9027997	9031997	451.64	539
Serpina3f	ENSMUSG00000066363	3.00874	2.28017e-05	0.000713217	6.8	0.2	0.0781731	0.284459	0.274813	0.78346	NA	chr12	104212544	104216544	68.644	68
NA	ENSMUSG00000089625	2.23084	2.30264e-05	0.000719014	5944	1305	0.200998	0.284009	0.707717	0.479121	NA	chr19	11693267	11697267	54.661	44
Unc5b	ENSMUSG00000020099	2.42656	2.37826e-05	0.000740098	33.7	5.9	0.121484	0.255596	0.475295	0.634577	0.971931	chr10	60829581	60833581	417.23	316
Prrg1	ENSMUSG00000047996	-2.19602	2.37437e-05	0.000740098	4	25.7	0.0338005	0.271759	0.124377	0.901017	0.990886	chrX	78581896	78585896	155.964	137
St14	ENSMUSG00000031995	2.99465	2.3862e-05	0.000741303	16.2	0.2	0.53952	0.273686	1.97131	0.0486883	0.735591	chr9	31129853	31133853	216.16	114
Col14a1	ENSMUSG00000022371	1.78892	2.41514e-05	0.000749022	19	5.1	0.466601	0.259666	1.79693	0.0723473	0.827592	chr15	55305750	55309750	272.252	160
Nppb	ENSMUSG00000029019	1.3687	2.43784e-05	0.000754781	2835.3	1048	0.601612	0.245556	2.45	0.0142857	0.449081	chr4	147983788	147987788	1145.5	574
NA	ENSMUSG00000101655	-3.19854	2.46077e-05	0.000760589	0.3	33.6	-0.305521	0.244228	-1.25096	0.210948	0.971931	chr6	86486227	86490227	884.393	1033
Fsd2	ENSMUSG00000038663	-1.11611	2.51515e-05	0.000776084	494	1105.5	-0.127022	0.249871	-0.508349	0.611208	0.971931	chr7	81564944	81568944	1274.65	1504
NA	ENSMUSG00000100009	-1.97692	2.53652e-05	0.000781359	5.1	25.3	-0.217535	0.271963	-0.799872	0.423785	NA	chr1	98587517	98591517	81.3559	106
NA	ENSMUSG00000090012	-2.37991	2.54723e-05	0.000783338	7.7	71.7	0.132425	0.276277	0.479322	0.63171	0.971931	chr17	49819825	49823825	110.593	102
Ntng2	ENSMUSG00000035513	-1.50638	2.55756e-05	0.000785191	23.6	69.1	0.341351	0.260392	1.31091	0.189887	0.971931	chr2	29251005	29255005	328.362	199
Tnrc18	ENSMUSG00000039477	2.23216	2.58732e-05	0.000792995	228.7	53.4	0.0179382	0.254636	0.0704464	0.943838	0.994121	chr5	142815662	142819662	1676.12	1701
NA	ENSMUSG00000095199	-2.59059	2.59665e-05	0.000794523	1.4	33.7	-0.355398	0.277582	-1.28034	0.200426	NA	chr2	176519000	176523000	17.7966	33
Abi1	ENSMUSG00000058835	1.2766	2.61965e-05	0.000800221	168.6	69.4	0.0560691	0.253345	0.221316	0.824847	0.982593	chr2	23038241	23042241	576.831	479
Col5a1	ENSMUSG00000026837	1.49318	2.68336e-05	0.00081695	85.5	30.1	0.18844	0.26364	0.714765	0.474754	0.971931	chr2	27884425	27888425	293.718	208
NA	ENSMUSG00000081758	2.21497	2.68268e-05	0.00081695	565.6	121.6	0.0136762	0.285204	0.0479524	0.961754	NA	chr2	165664857	165668857	72.4576	80
NA	ENSMUSG00000089213	2.72056	2.69753e-05	0.000819897	1131.8	146.8	-0.156076	0.285475	-0.546725	0.584568	NA	chr8	85110068	85114068	33.0508	46
Gnao1	ENSMUSG00000031748	2.23185	2.73542e-05	0.000830033	137.6	26	-0.0836742	0.267621	-0.312659	0.75454	0.977354	chr8	93807966	93811966	207.952	211
Gm14325	ENSMUSG00000095362	-1.94589	2.74795e-05	0.000832452	21.3	110.5	-0.315541	0.256974	-1.22791	0.21948	0.971931	chr2	177838336	177842336	377.159	442
Slc2a12	ENSMUSG00000037490	-2.97484	2.78044e-05	0.000839522	0.3	35.5	-0.813259	0.257132	-3.16281	0.00156253	0.15741	chr10	22643011	22647011	297.924	579
Sacs	ENSMUSG00000048279	1.59977	2.78048e-05	0.000839522	455.9	152.4	-0.556463	0.270973	-2.05357	0.0400174	0.704883	chr14	61136457	61140457	535.69	771
Irx5	ENSMUSG00000031737	1.93763	2.79189e-05	0.000841575	16.2	3.9	-0.2587	0.240236	-1.07686	0.281544	0.971931	chr8	92355625	92359625	680.562	730
Gatad2a	ENSMUSG00000036180	1.87476	2.79829e-05	0.000842114	143.3	39.1	0.0633335	0.249794	0.253544	0.799848	0.980421	chr8	69994384	69998384	481.749	394
Jdp2	ENSMUSG00000034271	2.65656	2.81675e-05	0.000846275	46.3	4.8	-0.214495	0.239036	-0.897331	0.369542	0.971931	chr12	85597027	85601027	381.913	411
Btbd7	ENSMUSG00000041702	1.25048	2.8241e-05	0.00084709	157.9	65	-0.13326	0.264565	-0.503695	0.614476	0.971931	chr12	102876471	102880471	510.274	505
Smad1	ENSMUSG00000031681	1.90166	2.88105e-05	0.000862755	182.6	48.1	0.0935178	0.25468	0.367197	0.713472	0.974849	chr8	79397518	79401518	570.493	460
Gzmm	ENSMUSG00000054206	-2.18885	2.93693e-05	0.000877888	6.5	39.9	-0.632327	0.25618	-2.46829	0.013576	0.441727	chr10	79687020	79691020	424.7	708
Igsf3	ENSMUSG00000042035	1.58338	2.95641e-05	0.000880991	56.3	18.4	0.106807	0.245175	0.435636	0.663101	0.972431	chr3	101375083	101379083	445.301	356
Rrp12	ENSMUSG00000035049	2.4394	2.96422e-05	0.000881881	441.3	81.9	0.44431	0.277025	1.60386	0.108744	0.902689	chr19	41894173	41898173	515.136	257
Tns3	ENSMUSG00000020422	1.77026	2.97349e-05	0.000883198	169.7	50.9	0.133281	0.261583	0.509516	0.61039	0.971931	chr11	8662681	8666681	648.143	490
Svep1	ENSMUSG00000028369	2.69081	2.98329e-05	0.000883558	12.6	1.4	0.416439	0.272227	1.52974	0.12608	0.929452	chr4	58204859	58208859	123.305	80
Cobl	ENSMUSG00000020173	2.11965	2.98437e-05	0.000883558	29.3	5.6	0.108399	0.266719	0.406416	0.684437	0.972431	chr11	12462960	12466960	192.903	161
NA	ENSMUSG00000088689	2.14084	3.02509e-05	0.000894165	7495.3	1756.3	-0.218795	0.249755	-0.876036	0.381011	0.971931	chr18	74776469	74780469	1137.08	1215
2810459M11Rik	ENSMUSG00000026227	-3.16989	3.03348e-05	0.000895195	0.1	4.3	0.347759	0.280321	1.24058	0.214763	NA	chr1	86043863	86047863	99.1525	72
NA	ENSMUSG00000093537	-2.41111	3.05271e-05	0.000899416	37.9	442.4	0.119859	0.264021	0.453976	0.649846	0.971931	chr10	17815379	17819379	486.503	376
Mast4	ENSMUSG00000034751	2.13378	3.06172e-05	0.000900619	572.1	145.7	0.0874288	0.261295	0.334598	0.737928	0.97486	chr13	103332497	103336497	289.199	224
Fgfr3	ENSMUSG00000054252	2.44183	3.10411e-05	0.000909319	56.7	6	1.00345	0.252744	3.97021	7.18099e-05	0.019543	chr5	33719674	33723674	521.161	171
Anxa3	ENSMUSG00000029484	2.63709	3.10623e-05	0.000909319	59.2	5.1	0.328519	0.263104	1.24863	0.211802	0.971931	chr5	96791339	96795339	335.893	202
Apbb2	ENSMUSG00000029207	1.44915	3.09798e-05	0.000909319	391.5	140.7	0.00348022	0.245408	0.0141814	0.988685	0.99914	chr5	66616784	66620784	553.061	490
Spata13	ENSMUSG00000021990	2.05612	3.11856e-05	0.000911468	43.4	9.4	0.419901	0.271106	1.54885	0.121418	0.919126	chr14	60632001	60636001	122.034	82
Hes1	ENSMUSG00000022528	1.48575	3.12703e-05	0.000912484	150.2	52.5	0.0424207	0.254944	0.166392	0.867849	0.986679	chr16	30062384	30066384	1354.39	1171
Fam171a1	ENSMUSG00000050530	2.24596	3.15666e-05	0.00091966	32	7.3	-0.545672	0.271415	-2.01047	0.0443812	0.725132	chr2	3112224	3116224	94.3991	161
Zbtb7b	ENSMUSG00000028042	2.29219	3.17595e-05	0.000923807	217.2	48.7	-0.17761	0.240656	-0.738026	0.460498	0.971931	chr3	89392776	89396776	1219.62	1269
Pxdn	ENSMUSG00000020674	-1.4399	3.18149e-05	0.000923947	32.6	98.5	-0.423237	0.237404	-1.78277	0.0746244	0.834786	chr12	29935608	29939608	400.93	533
Crlf2	ENSMUSG00000033467	3.3056	3.19494e-05	0.000925444	11.7	0.1	0.229552	0.263843	0.870032	0.384283	0.971931	chr5	109556993	109560993	406.686	270
A430105I19Rik	ENSMUSG00000045838	2.30027	3.19677e-05	0.000925444	495.4	95.6	0.0234863	0.245017	0.0958557	0.923635	0.992712	chr2	118760661	118764661	1211.57	1258
A1bg	ENSMUSG00000022347	-2.25885	3.22178e-05	0.000931207	3.1	22.1	0.0730014	0.279606	0.261087	0.794025	NA	chr15	60921012	60925012	76.2711	76
Fam46a	ENSMUSG00000032265	1.23096	3.26281e-05	0.000940091	137.6	58.1	-0.0571617	0.248645	-0.229893	0.818175	0.981104	chr9	85325348	85329348	1631.67	1791
NA	ENSMUSG00000055416	-3.13095	3.26209e-05	0.000940091	0.6	88.7	-0.246366	0.277429	-0.888035	0.374522	NA	chr15	31274491	31278491	62.2881	83
NA	ENSMUSG00000009927	-2.11254	3.35339e-05	0.000964668	14.8	102.9	-0.00235191	0.24815	-0.00947775	0.992438	0.999347	chr9	44405139	44409139	469.072	419
Gm5113	ENSMUSG00000066647	-1.61106	3.35992e-05	0.000965026	9.2	31.8	-0.413557	0.260843	-1.58546	0.112862	0.906971	chr7	30167875	30171875	635.079	767
Cryab	ENSMUSG00000032060	2.21949	3.37119e-05	0.000966742	4588.6	1100.6	-0.0813218	0.254592	-0.31942	0.749408	0.977354	chr9	50749325	50753325	1161.38	1269
Fam219a	ENSMUSG00000028439	2.27389	3.41077e-05	0.00097656	61.5	12.4	-0.203901	0.256009	-0.796462	0.425763	0.971931	chr4	41567538	41571538	206.584	236
Tmem52	ENSMUSG00000023153	-3.38528	3.51645e-05	0.00100524	0.8	120.5	-0.750837	0.255914	-2.93395	0.00334682	0.233356	chr4	155467114	155471114	170.206	300
NA	ENSMUSG00000021557	-1.17119	3.60962e-05	0.00103026	335.4	785.8	-0.257027	0.261256	-0.983814	0.325207	0.971931	chr13	59583227	59587227	535.629	602
Dab2ip	ENSMUSG00000026883	1.94462	3.61707e-05	0.00103078	210.4	54.6	0.324326	0.243273	1.33318	0.182474	0.971931	chr2	35556266	35560266	842.28	523
Egflam	ENSMUSG00000042961	-2.43976	3.63165e-05	0.00103332	1.8	20.1	0.0465198	0.266615	0.174483	0.861486	0.98619	chr15	7396395	7400395	104.237	104
Lrp1	ENSMUSG00000040249	1.94352	3.64576e-05	0.00103572	95.9	26.4	-0.0443549	0.256141	-0.173166	0.862521	0.98619	chr10	127619148	127623148	791.743	673
Gpc6	ENSMUSG00000058571	2.64476	3.67183e-05	0.00104151	45.8	8.4	0.133532	0.266032	0.50194	0.61571	0.971931	chr14	116923315	116927315	195.639	158
1700017D01Rik	ENSMUSG00000024729	3.17056	3.68513e-05	0.00104366	6.4	0.5	0.0599248	0.283636	0.211273	0.832674	NA	chr19	11128876	11132876	50.8474	51
Efcab2	ENSMUSG00000026495	-2.37836	3.71255e-05	0.00104818	9.6	120.5	-0.233691	0.257612	-0.907142	0.364331	0.971931	chr1	178404085	178408085	926.507	990
Prmt2	ENSMUSG00000020230	1.65178	3.70913e-05	0.00104818	51.4	14.9	-0.0288773	0.251639	-0.114757	0.908638	0.990886	chr10	76235865	76239865	394.591	355
Dpep1	ENSMUSG00000019278	-3.03545	3.74031e-05	0.00105439	0.2	12.5	-0.403385	0.266557	-1.51331	0.1302	0.935085	chr8	123184242	123188242	146.387	209
Nin	ENSMUSG00000021068	1.77181	3.77035e-05	0.00106122	156	44.6	-0.114172	0.264908	-0.430988	0.666477	0.972431	chr12	70111717	70115717	157.332	164
2310057M21Rik	ENSMUSG00000040177	1.77336	3.78429e-05	0.00106302	81.8	23.2	0.236635	0.260484	0.908444	0.363644	0.971931	chr7	131360759	131364759	676.668	463
Mansc4	ENSMUSG00000072662	-3.05226	3.80579e-05	0.00106626	0.2	11.1	0.0550829	0.281607	0.195602	0.844922	NA	chr6	147085032	147089032	61.0169	60
Fbn2	ENSMUSG00000024598	2.09101	3.83742e-05	0.00107348	27.9	6.7	0.218058	0.265505	0.821296	0.411478	0.971931	chr18	58208487	58212487	169.645	128
Gsn	ENSMUSG00000026879	-1.8459	3.89524e-05	0.00108799	26.4	109	0.888208	0.254925	3.48419	0.000493625	0.0810878	chr2	35254380	35258380	322.872	130
Slc12a4	ENSMUSG00000017765	1.31867	3.93459e-05	0.0010973	337.1	132.1	-0.228891	0.250896	-0.912295	0.361613	0.971931	chr8	105964097	105968097	955.145	1041
Bcl2l11	ENSMUSG00000027381	-1.82941	4.02706e-05	0.00112138	4	16.2	-0.873737	0.244404	-3.57497	0.000350274	0.063869	chr2	128124038	128128038	456.515	837
Hspg2	ENSMUSG00000028763	2.31534	4.05741e-05	0.00112811	2552.6	595.3	0.173223	0.244499	0.708483	0.478645	0.971931	chr4	137466769	137470769	1143.82	847
Zbtb4	ENSMUSG00000018750	2.03187	4.0737e-05	0.00113092	112	28.3	-0.102122	0.253974	-0.402097	0.687612	0.972431	chr11	69763912	69767912	423.115	421
Rnf122	ENSMUSG00000039328	-1.59481	4.11071e-05	0.00113946	44.9	153.5	-0.138849	0.250555	-0.554166	0.579465	0.971931	chr8	31109820	31113820	1116.86	1104
Elovl1	ENSMUSG00000006390	2.19767	4.12717e-05	0.00114056	24.6	5.1	0.388314	0.269664	1.43999	0.14987	0.945163	chr4	118426093	118430093	409.699	226
Plekhg2	ENSMUSG00000037552	2.21911	4.12613e-05	0.00114056	170.8	37.2	0.13976	0.256422	0.545039	0.585727	0.971931	chr7	28370599	28374599	502.351	382
Bcl2l1	ENSMUSG00000007659	2.17077	4.20429e-05	0.00116012	182.5	42.5	-0.0360379	0.253715	-0.142041	0.887048	0.990253	chr2	152829728	152833728	1206.14	1079
Tpcn2	ENSMUSG00000048677	1.63269	4.22038e-05	0.0011628	25.6	7.6	0.401542	0.261417	1.53602	0.124533	0.92721	chr7	145282011	145286011	212.056	134
Med15	ENSMUSG00000012114	2.35011	4.23386e-05	0.00116476	1066	245.9	0.526169	0.274927	1.91385	0.0556396	NA	chr16	17730891	17734891	118.22	66
Sfxn2	ENSMUSG00000025036	-1.79387	4.24716e-05	0.00116582	4.4	20.3	-0.566178	0.264487	-2.14066	0.0323011	0.650362	chr19	46571365	46575365	236.481	348
Aebp1	ENSMUSG00000020473	2.49543	4.25047e-05	0.00116582	35.4	5.4	0.252621	0.2669	0.946504	0.343892	0.971931	chr11	5859947	5863947	180.59	128
Numbl	ENSMUSG00000063160	2.02321	4.26181e-05	0.00116717	26.7	6.7	0.819514	0.271004	3.02399	0.00249466	0.204583	chr7	27256433	27260433	570.867	200
Add1	ENSMUSG00000029106	1.60281	4.27134e-05	0.00116803	277.4	94.9	-0.0130767	0.252579	-0.0517727	0.95871	0.995102	chr5	34571664	34575664	857.441	766
Athl1	ENSMUSG00000062031	2.78635	4.33946e-05	0.00118489	7.7	0.8	0.186779	0.271015	0.689183	0.490708	0.971931	chr7	140939391	140943391	337.399	230
Acsm5	ENSMUSG00000030972	-2.80182	4.35147e-05	0.00118639	0.6	17.1	-0.170825	0.274967	-0.621256	0.534431	NA	chr7	119517463	119521463	71.1864	90
Appl2	ENSMUSG00000020263	-1.11738	4.38844e-05	0.00119469	435.1	992.7	-0.202965	0.263021	-0.771668	0.440311	0.971931	chr10	83646738	83650738	421.531	457
Dusp6	ENSMUSG00000019960	2.17312	4.47434e-05	0.00121445	18.3	3	0.391659	0.243381	1.60924	0.107564	0.902689	chr10	99261231	99265231	1600.13	1153
Uhrf1bp1	ENSMUSG00000039512	1.69405	4.47278e-05	0.00121445	116	37.6	-0.138232	0.252294	-0.547899	0.583761	0.971931	chr17	27854441	27858441	404.099	403
Rpph1	ENSMUSG00000092837	2.73345	4.5325e-05	0.0012266	941.9	157.2	-0.195816	0.274592	-0.713115	0.475774	0.971931	chr14	50805767	50809767	151.859	172
Prkag3	ENSMUSG00000006542	1.73165	4.52922e-05	0.0012266	165.3	49.9	0.0975782	0.252914	0.385815	0.699634	0.974347	chr1	74747221	74751221	624.373	496
NA	ENSMUSG00000097482	3.04198	4.59924e-05	0.00124281	21.7	1	-0.362794	0.266402	-1.36183	0.173253	0.966082	chr1	105354007	105358007	110.816	154
Ak3	ENSMUSG00000024782	-1.59723	4.65077e-05	0.00125304	97.5	322.9	-0.198582	0.251422	-0.789838	0.429622	0.971931	chr19	29045961	29049961	1103.39	1201
Scn1b	ENSMUSG00000019194	2.43737	4.6574e-05	0.00125304	69	8.8	0.0680417	0.251808	0.270213	0.786997	0.98003	chr7	31125003	31129003	432.624	358
Gm14295	ENSMUSG00000078877	-2.20993	4.67168e-05	0.00125351	2.9	24.8	-0.728871	0.278248	-2.6195	0.00880581	NA	chr2	176796612	176800612	10.1695	42
Pyroxd2	ENSMUSG00000060224	1.70238	4.71988e-05	0.0012642	495.1	155.2	0.0325827	0.257947	0.126316	0.899482	0.990587	chr19	42750775	42754775	953.46	805
Zfp414	ENSMUSG00000073423	1.73766	4.76178e-05	0.00127355	277.9	85.3	0.127177	0.262198	0.485041	0.627647	0.971931	chr17	33627090	33631090	412.711	304
Sh3d19	ENSMUSG00000028082	1.59794	4.79227e-05	0.0012797	50.9	16.8	0.185841	0.272927	0.680918	0.495923	0.971931	chr3	85969109	85973109	131.338	104
Gm8439	ENSMUSG00000091297	-2.39238	4.79878e-05	0.0012797	23.4	429.6	-0.321157	0.26598	-1.20745	0.227258	0.971931	chr4	120586745	120590745	102.608	133
NA	ENSMUSG00000081574	-2.51893	4.82256e-05	0.00128417	1.3	9.6	0.131481	0.283436	0.463882	0.642732	NA	chr2	177853503	177857503	53.3898	48
Cd28	ENSMUSG00000026012	-2.36454	4.83656e-05	0.00128602	1.7	16.3	-0.368205	0.24895	-1.47903	0.139132	0.940058	chr1	60714800	60718800	808.588	1004
Pprc1	ENSMUSG00000055491	1.87564	4.86724e-05	0.001292	335.7	95.7	-0.452227	0.246555	-1.83418	0.0666266	0.80897	chr19	46042886	46046886	587.911	747
Cntfr	ENSMUSG00000028444	2.93605	4.87627e-05	0.001292	25.9	0.5	-0.271277	0.277997	-0.975826	0.329151	0.971931	chr4	41695089	41699089	91.5253	122
B4galt2	ENSMUSG00000028541	2.73959	4.88027e-05	0.001292	27.8	2.9	0.0367496	0.258115	0.142377	0.886782	0.990253	chr4	117881487	117885487	150.491	140
Art1	ENSMUSG00000030996	-1.33101	4.92698e-05	0.00130248	351.4	943.8	-0.161763	0.245991	-0.657598	0.510796	0.971931	chr7	102099743	102103743	1142.74	1395
Cacnb1	ENSMUSG00000020882	2.241	4.94849e-05	0.00130627	232.4	48.8	0.15994	0.249795	0.640283	0.521989	0.971931	chr11	98021034	98025034	457.979	348
NA	ENSMUSG00000087630	-2.34407	5.03258e-05	0.00132546	4.8	76.6	-0.716663	0.24476	-2.92802	0.00341132	0.234532	chr11	95030759	95034759	247.213	445
Gcnt2	ENSMUSG00000021360	2.20836	5.03569e-05	0.00132546	50.3	8.5	-0.0448282	0.266412	-0.168266	0.866374	0.986341	chr13	40857754	40861754	160.068	157
Kank1	ENSMUSG00000032702	1.87956	5.09539e-05	0.00133925	829.9	237.4	-0.645073	0.254889	-2.53081	0.0113801	0.406076	chr19	25234975	25238975	216.899	340
Lrrtm3	ENSMUSG00000042846	-1.91772	5.10546e-05	0.00133996	62.5	315.9	0.0977672	0.2766	0.35346	0.723743	NA	chr10	64088277	64092277	82.627	77
Dhrs7c	ENSMUSG00000033044	-2.54807	5.12033e-05	0.00134039	9.1	241.4	-0.400156	0.246345	-1.62437	0.104296	0.891994	chr11	67796187	67800187	916.202	1396
NA	ENSMUSG00000070282	-1.74713	5.12176e-05	0.00134039	4.7	16.9	-0.182396	0.266591	-0.684176	0.493864	0.971931	chr9	109830706	109834706	329.868	328
Igsf9b	ENSMUSG00000034275	2.05101	5.14109e-05	0.00134352	99.9	23.1	-0.0876729	0.259514	-0.337835	0.735487	0.97486	chr9	27297204	27301204	251.543	233
Plagl1	ENSMUSG00000019817	2.67649	5.17474e-05	0.00135038	12.9	1.3	0.137565	0.284529	0.483484	0.628752	NA	chr10	13058504	13062504	55.9322	50
P4ha3	ENSMUSG00000051048	2.67046	5.1987e-05	0.00135277	20.7	2.1	0.713985	0.279864	2.55118	0.0107358	0.395425	chr7	100283520	100287520	150	68
Ube2ql1	ENSMUSG00000052981	2.08459	5.19749e-05	0.00135277	33.5	7.1	0.474824	0.261984	1.81241	0.0699222	0.820553	chr13	69737889	69741889	670.329	357
Nup93	ENSMUSG00000032939	1.71581	5.25418e-05	0.00136527	106.4	30.8	-0.0837622	0.251283	-0.333338	0.738879	0.974955	chr8	94212564	94216564	451.64	431
NA	ENSMUSG00000065629	3.30653	5.27286e-05	0.00136817	23.5	0.5	0.0257131	0.275256	0.0934153	0.925574	NA	chr1	39517533	39521533	86.4406	88
Dtx3	ENSMUSG00000040415	1.7474	5.31422e-05	0.00137695	535.6	157.9	0.0899385	0.273624	0.328694	0.742387	0.97618	chr10	127193728	127197728	375.055	279
C230029F24Rik	ENSMUSG00000051616	3.18517	5.33572e-05	0.00138056	23.4	1	0.0301215	0.28551	0.1055	0.915979	NA	chr1	49242616	49246616	38.1356	41
2210408F21Rik	ENSMUSG00000087380	-0.976468	5.352e-05	0.00138281	142.8	284.6	0.0145688	0.253828	0.0573962	0.95423	0.994769	chr6	31218351	31222351	1719.13	1772
Otulin	ENSMUSG00000046034	1.62362	5.37238e-05	0.00138612	377.4	116.2	0.424163	0.256611	1.65295	0.0983419	0.883419	chr15	27628693	27632693	1051.16	602
BC028528	ENSMUSG00000038543	-2.63854	5.39697e-05	0.0013905	2.3	56.6	-0.241946	0.257407	-0.939936	0.34725	0.971931	chr3	95890005	95894005	442.132	493
Inpp5f	ENSMUSG00000042105	1.59045	5.41668e-05	0.00139361	76.2	23.7	0.291368	0.244752	1.19046	0.233865	0.971931	chr7	128609328	128613328	491.258	332
Gp1ba	ENSMUSG00000050675	-2.13486	5.45528e-05	0.00140157	6	38.6	-0.228853	0.260309	-0.879157	0.379316	0.971931	chr11	70637122	70641122	131.338	158
Ip6k3	ENSMUSG00000024210	2.41509	5.47182e-05	0.00140305	232.4	43.3	0.0243217	0.247351	0.0983289	0.921671	0.992015	chr17	27165795	27169795	953.46	833
ND5	ENSMUSG00000064367	-1.38099	5.47641e-05	0.00140305	217.9	564.7	NA	NA	NA	NA	NA	chrMT	9742	13742	0.127119	0.1
Arhgef7	ENSMUSG00000031511	1.84061	5.50044e-05	0.0014061	752.1	221.8	0.172957	0.24708	0.700002	0.483926	0.971931	chr8	11725721	11729721	828.803	590
Hipk2	ENSMUSG00000061436	1.72855	5.52113e-05	0.0014061	810.1	252.4	0.14429	0.265222	0.544034	0.586418	0.971931	chr6	38874165	38878165	818.696	565
1110038F14Rik	ENSMUSG00000063236	2.03163	5.51939e-05	0.0014061	163	39.9	-0.295271	0.261379	-1.12966	0.258618	0.971931	chr15	76946506	76950506	190.166	237
NA	ENSMUSG00000087943	2.32735	5.52681e-05	0.0014061	540458	89565.9	-0.209995	0.263782	-0.796095	0.425977	NA	chr4	139336304	139340304	13.983	21
NA	ENSMUSG00000096449	-1.79478	5.50703e-05	0.0014061	40.1	152.4	-0.389313	0.284541	-1.36822	0.171244	NA	chr13	85125514	85129514	21.6102	44
NA	ENSMUSG00000082376	-2.86682	5.55542e-05	0.00141142	0.4	7.4	0.159557	0.267818	0.595765	0.551332	NA	chr2	175229291	175233291	16.5254	12
Phactr4	ENSMUSG00000066043	1.441	5.60515e-05	0.00142207	244.3	87.8	-0.30469	0.267552	-1.13881	0.254784	0.971931	chr4	132420489	132424489	331.374	376
Arhgap9	ENSMUSG00000040345	-2.63672	5.62878e-05	0.00142609	2	60.3	-0.0315917	0.263074	-0.120087	0.904414	0.990886	chr10	127319964	127323964	136.81	134
NA	ENSMUSG00000096519	3.26661	5.63969e-05	0.00142687	578.1	51.8	-0.443156	0.226577	-1.95587	0.0504804	0.745915	chr9	3011140	3015140	17007.8	15663
Rfpl4	ENSMUSG00000035191	-2.93586	5.6973e-05	0.00143945	0.3	21.8	0.0392065	0.280676	0.139686	0.888908	NA	chr7	5114950	5118950	68.644	69
Hip1r	ENSMUSG00000000915	2.30194	5.75895e-05	0.00145302	57.9	12.3	-0.0608008	0.258753	-0.234976	0.814227	0.981104	chr5	123971628	123975628	166.909	168
Adck4	ENSMUSG00000003762	1.90741	5.78875e-05	0.00145652	78.7	18.9	0.771153	0.259086	2.97643	0.00291622	0.219728	chr7	27231023	27235023	762.242	311
Nek8	ENSMUSG00000017405	1.7083	5.78442e-05	0.00145652	62.9	19.3	-0.170864	0.245748	-0.695281	0.486879	0.971931	chr11	78174675	78178675	717.622	699
Anxa7	ENSMUSG00000021814	1.46638	5.82061e-05	0.00146252	100.2	35.7	0.319546	0.252341	1.26633	0.205396	0.971931	chr14	20478133	20482133	759.072	492
Plxnb2	ENSMUSG00000036606	1.42221	5.85088e-05	0.0014681	352.6	132.4	-0.0784956	0.241284	-0.325324	0.744936	0.977116	chr15	89178788	89182788	1483.99	1680
Arhgap27	ENSMUSG00000034255	2.53927	5.87155e-05	0.00147127	20.5	3	0.411825	0.261253	1.57634	0.114946	0.909957	chr11	103361692	103365692	417.23	233
Zfp866	ENSMUSG00000043090	-1.18388	6.02423e-05	0.00150746	115.7	282	-0.0622918	0.254706	-0.244564	0.806794	0.98087	chr8	69789178	69793178	399.345	374
Tmem150a	ENSMUSG00000055912	1.52587	6.05032e-05	0.00150779	1147.1	385.3	-0.273509	0.245126	-1.11579	0.264513	0.971931	chr6	72353447	72357447	874.286	1003
H2afx	ENSMUSG00000049932	2.02076	6.04762e-05	0.00150779	117.1	21	0.0724875	0.259996	0.278802	0.780397	0.98003	chr9	44332694	44336694	434.208	349
Ppip5k1	ENSMUSG00000033526	1.85527	6.04721e-05	0.00150779	1291.5	384.2	0.0652078	0.264339	0.246683	0.805154	0.980714	chr2	121353396	121357396	857.441	646
Mllt11	ENSMUSG00000053192	2.34734	6.11348e-05	0.00152146	36	5.5	0.471055	0.262106	1.79719	0.0723048	0.827592	chr3	95230171	95234171	388.611	206
Skap2	ENSMUSG00000059182	1.85931	6.17797e-05	0.00153541	10.4	2.5	-0.103674	0.26278	-0.394528	0.693192	0.97273	chr6	52010549	52014549	287.693	268
NA	ENSMUSG00000096201	3.24378	6.18722e-05	0.00153563	704	61	-0.439449	0.227926	-1.92803	0.0538512	0.756371	chr9	3034877	3038877	10399.4	9592
NA	ENSMUSG00000078896	-2.23956	6.21164e-05	0.00153959	7.6	68.9	-0.0706933	0.243847	-0.289909	0.771886	NA	chr2	175467985	175471985	10.1695	12
Col6a2	ENSMUSG00000020241	1.57616	6.22581e-05	0.00154101	112.1	35.4	0.229522	0.271133	0.846529	0.397258	0.971931	chr10	76621630	76625630	231.209	168
Abcd4	ENSMUSG00000021240	1.3097	6.26584e-05	0.00154304	117.8	46.9	-0.129048	0.273901	-0.471149	0.637534	0.971931	chr12	84615413	84619413	216.16	224
Coro7	ENSMUSG00000039637	1.85798	6.26777e-05	0.00154304	121.8	33.2	-0.194172	0.25462	-0.762593	0.445706	0.971931	chr16	4677777	4681777	274.137	281
Ppp1r9b	ENSMUSG00000038976	1.95447	6.25153e-05	0.00154304	180.7	49.5	0.107374	0.251845	0.426349	0.669854	0.972431	chr11	94989035	94993035	1145.5	891
Ankrd1	ENSMUSG00000024803	1.90917	6.24986e-05	0.00154304	20590.2	5063.5	-0.0387639	0.259842	-0.149183	0.88141	0.990124	chr19	36118099	36122099	906.293	831
Igtp	ENSMUSG00000078853	-2.30993	6.31923e-05	0.00155152	1.1	15.6	-0.669523	0.250216	-2.67578	0.00745546	0.330761	chr11	58197556	58201556	339.126	567
Gab2	ENSMUSG00000004508	1.94864	6.353e-05	0.00155563	77.3	20.1	-0.0620541	0.249893	-0.248323	0.803885	0.980513	chr7	97079586	97083586	726.045	631
NA	ENSMUSG00000086816	-2.55391	6.35157e-05	0.00155563	1.3	17.7	0.187209	0.271712	0.688999	0.490824	NA	chr19	46265669	46269669	94.0677	82
Rrbp1	ENSMUSG00000027422	2.17549	6.39122e-05	0.0015629	1283.8	302.2	-0.067662	0.235115	-0.287783	0.773513	0.978994	chr2	144009263	144013263	589.509	556
Plin5	ENSMUSG00000011305	-1.35555	6.46267e-05	0.00157826	76.3	211.8	-0.892003	0.253754	-3.51522	0.000439382	0.0758892	chr17	56115596	56119596	547.482	1137
Gpr17	ENSMUSG00000052229	1.32086	6.47489e-05	0.00157913	298.3	119.4	-0.0803862	0.270262	-0.297438	0.766132	0.978322	chr18	31947636	31951636	153.228	154
Fbxl2	ENSMUSG00000032507	2.15112	6.5294e-05	0.00158818	24.6	3.6	0.0142972	0.28505	0.0501569	0.959997	NA	chr9	114044191	114048191	54.661	59
Specc1	ENSMUSG00000042331	2.54608	6.56929e-05	0.00159576	9.9	0.9	-0.0553395	0.278567	-0.198658	0.84253	NA	chr11	61954763	61958763	62.2881	69
NA	ENSMUSG00000075014	3.24305	6.58257e-05	0.00159639	34206.6	3281.2	-0.464764	0.226828	-2.04897	0.0404649	0.707535	chr2	98665301	98669301	798461	746185
NA	ENSMUSG00000091028	3.24184	6.58934e-05	0.00159639	1900.3	165.4	-0.446682	0.226412	-1.97287	0.0485103	0.735591	chr9	2998922	3002922	183956	169620
Fndc5	ENSMUSG00000001334	-1.32968	6.6181e-05	0.00159978	66.7	178	-0.749308	0.239227	-3.13221	0.00173495	0.16474	chr4	129134999	129138999	827.118	1480
NA	ENSMUSG00000096385	3.23498	6.62454e-05	0.00159978	2930.2	289.5	-0.454287	0.227085	-2.00051	0.0454449	0.726753	chr9	3001346	3005346	66819.7	62021
Fgf6	ENSMUSG00000000183	1.90913	6.62963e-05	0.00159978	18.4	4.7	0.168442	0.261128	0.645057	0.51889	0.971931	chr6	127013586	127017586	403.674	287
Cchcr1	ENSMUSG00000040312	2.19516	6.65946e-05	0.00160486	60.3	10.8	-0.123222	0.256618	-0.480175	0.631103	0.971931	chr17	35515100	35519100	164.172	177
Gnai2	ENSMUSG00000032562	1.67635	6.72092e-05	0.00161541	161.4	48.8	0.270103	0.255531	1.05702	0.290501	0.971931	chr9	107633367	107637367	938.299	594
NA	ENSMUSG00000065637	2.52864	6.71463e-05	0.00161541	750.7	162.7	-0.151123	0.259464	-0.582444	0.560268	0.971931	chr8	126942980	126946980	459.564	476
NA	ENSMUSG00000095280	3.22547	6.77765e-05	0.00162264	6995.5	739	-0.453875	0.222481	-2.04006	0.0413442	0.708524	chr14	19416930	19420930	32031.2	29064
NA	ENSMUSG00000075015	3.22723	6.77481e-05	0.00162264	13581	1442	-0.401464	0.22225	-1.80636	0.0708619	0.824666	chr2	98660237	98664237	53397.8	47311
Epb4.1l4a	ENSMUSG00000024376	1.68062	6.76305e-05	0.00162264	106.2	32	0.0123011	0.251684	0.048875	0.961019	0.995278	chr18	34004966	34008966	435.793	382
NA	ENSMUSG00000085218	-2.21836	6.84032e-05	0.0016355	22	183.9	-0.630722	0.26307	-2.39755	0.0165051	0.47325	chr2	106648364	106652364	523.898	817
NA	ENSMUSG00000092373	-3.1172	6.87024e-05	0.00164051	0.1	7.8	0.0985605	0.274357	0.359241	0.719415	0.974849	chr12	21253952	21257952	101.695	96
NA	ENSMUSG00000096736	3.22239	6.98184e-05	0.00166498	392.2	37.6	-0.448235	0.226162	-1.98192	0.0474886	0.729491	chr9	3032599	3036599	11578	10718
Dip2a	ENSMUSG00000020231	1.78271	7.02683e-05	0.00167134	57.4	16.3	-0.42666	0.251432	-1.69692	0.0897117	0.869435	chr10	76343291	76347291	260.58	331
Porcn	ENSMUSG00000031169	2.39405	7.01793e-05	0.00167134	33.4	6.9	0.0844355	0.27399	0.30817	0.757953	NA	chrX	8204525	8208525	95.3389	89
Ace	ENSMUSG00000020681	1.98109	7.04849e-05	0.00167431	33.1	8.1	-0.224094	0.265204	-0.844986	0.398118	0.971931	chr11	105965945	105969945	135.442	161
Mkl1	ENSMUSG00000042292	1.66854	7.20316e-05	0.00170662	107.5	33	-0.11142	0.2612	-0.426569	0.669694	0.972431	chr15	81188757	81192757	470.656	449
NA	ENSMUSG00000097669	-2.47279	7.26677e-05	0.00171946	22.6	543.4	0.121639	0.277289	0.438671	0.6609	NA	chr6	6327994	6331994	92.7965	84
Sbk2	ENSMUSG00000030433	-2.81998	7.33886e-05	0.00173427	0.2	6.5	-0.671899	0.267817	-2.5088	0.0121143	0.420028	chr7	4962406	4966406	80.7181	160
Gpr158	ENSMUSG00000045967	-2.77776	7.41421e-05	0.00174981	0.3	13.6	0.161341	0.280445	0.575303	0.565086	NA	chr2	21365542	21369542	62.2881	55
NA	ENSMUSG00000076281	2.31609	7.43518e-05	0.0017525	773097	127906	-0.0323324	0.266406	-0.121365	0.903402	0.990886	chr9	56221771	56225771	175.117	168
Hoga1	ENSMUSG00000025176	2.5278	7.46453e-05	0.00175715	14.4	1.4	0.136222	0.260366	0.523195	0.600839	0.971931	chr19	42043610	42047610	150.491	127
NA	ENSMUSG00000085826	3.00788	7.50712e-05	0.0017649	11.4	0.2	0.267685	0.277873	0.963337	0.335378	NA	chr16	45943606	45947606	77.5423	60
Gdf15	ENSMUSG00000038508	2.04775	7.54104e-05	0.0017706	76.8	14.6	0.162276	0.2495	0.650404	0.515431	0.971931	chr8	70630456	70634456	589.509	444
NA	ENSMUSG00000095186	3.21715	7.56377e-05	0.00177365	1127.6	110.5	-0.448032	0.225312	-1.9885	0.0467565	0.726753	chr9	3021547	3025547	231056	211302
NA	ENSMUSG00000091553	2.80135	7.58923e-05	0.00177734	15.3	1.2	0.032045	0.280628	0.11419	0.909087	NA	chr12	104190926	104194926	71.1864	75
Dmtn	ENSMUSG00000022099	2.87797	7.60178e-05	0.001778	21.2	3.6	-0.125071	0.276922	-0.451646	0.651524	NA	chr14	70634048	70638048	74.9999	91
NA	ENSMUSG00000095891	3.20805	7.71702e-05	0.00179925	6929.3	661.5	-0.448493	0.225305	-1.99061	0.0465239	0.726753	chr9	3023417	3027417	234998	214985
NA	ENSMUSG00000088246	2.33812	7.71885e-05	0.00179925	229530	37090.9	-0.165285	0.255572	-0.646726	0.51781	0.971931	chr1	167338424	167342424	262.087	263
NA	ENSMUSG00000078898	-2.28771	7.72217e-05	0.00179925	2.7	43	-0.272736	0.279698	-0.975107	0.329507	NA	chr2	175370436	175374436	16.5254	28
Cacna1g	ENSMUSG00000020866	-1.86034	7.81944e-05	0.00181727	32.7	156.2	-0.44755	0.259299	-1.726	0.0843468	0.865149	chr11	94472198	94476198	147.755	216
NA	ENSMUSG00000097383	-2.98841	7.81003e-05	0.00181727	0.2	4.5	-0.318755	0.271433	-1.17434	0.240257	0.971931	chr10	89684371	89688371	286.187	330
Pkd2l2	ENSMUSG00000014503	-1.4582	7.86604e-05	0.00182578	49.4	153.6	-0.613908	0.252702	-2.42937	0.0151249	0.458119	chr18	34406489	34410489	596.334	949
NA	ENSMUSG00000095547	3.20118	7.92913e-05	0.00183809	3132.1	326.5	-0.477633	0.224425	-2.12825	0.0333166	0.662482	chr9	3015408	3019408	23571.8	22032
Kazn	ENSMUSG00000040606	-2.03092	8.06718e-05	0.00186772	4.5	23.9	0.00280668	0.26461	0.0106069	0.991537	0.999347	chr4	142237401	142241401	131.338	128
Ablim3	ENSMUSG00000032735	2.03015	8.16029e-05	0.00188609	41.8	9.7	0.0114144	0.260461	0.0438238	0.965045	0.996382	chr18	61909824	61913824	223.001	204
Dgkz	ENSMUSG00000040479	2.64806	8.16718e-05	0.00188609	2482.7	578.8	-0.110067	0.269616	-0.408237	0.683099	NA	chr2	91973864	91977864	88.983	104
NA	ENSMUSG00000082724	-1.89557	8.20791e-05	0.0018931	6.7	33.1	-0.204963	0.272118	-0.753213	0.451322	NA	chr2	177136660	177140660	12.7119	20
Thsd4	ENSMUSG00000032289	1.68465	8.36849e-05	0.00192771	23.8	7.5	0.0248953	0.25448	0.0978282	0.922069	0.992152	chr9	60520046	60524046	192.903	180
NA	ENSMUSG00000073779	2.77458	8.44017e-05	0.00193994	15.1	1.2	0.911702	0.268006	3.40179	0.000669458	0.0961173	chr4	107821022	107825022	205.215	78
Ttll7	ENSMUSG00000036745	1.8259	8.4483e-05	0.00193994	32.5	7.8	0.161098	0.27254	0.591098	0.554454	0.971931	chr3	146850367	146854367	301.249	209
NA	ENSMUSG00000086235	2.3921	8.47089e-05	0.0019415	87.8	9.6	-0.122268	0.285549	-0.428185	0.668517	NA	chr1	8466825	8470825	47.0339	61
NA	ENSMUSG00000094686	-3.08647	8.48738e-05	0.00194284	0.1	7.3	-0.173406	0.28259	-0.613631	0.539459	NA	chr4	42771993	42775993	22.8813	36
NA	ENSMUSG00000040705	-1.67746	8.57344e-05	0.00195764	18.3	65.4	-0.405705	0.261102	-1.55382	0.120228	0.919126	chr7	19419417	19423417	158.7	219
Nrbp2	ENSMUSG00000075590	1.87953	8.57062e-05	0.00195764	1784.3	481.6	-0.350433	0.253187	-1.38409	0.166332	0.95809	chr15	76089627	76093627	268.112	316
Ift122	ENSMUSG00000030323	1.58543	8.59216e-05	0.00195946	57.7	19	-0.0146013	0.259244	-0.0563226	0.955085	0.99503	chr6	115851470	115855470	220.265	212
NA	ENSMUSG00000101995	-1.63588	8.63671e-05	0.0019648	140.3	545	-0.502537	0.256843	-1.95659	0.0503952	0.74526	chr1	92846771	92850771	295.224	402
Eci1	ENSMUSG00000024132	-2.03765	8.64781e-05	0.0019648	35.4	199.7	-0.451901	0.264833	-1.70636	0.0879407	0.866952	chr17	24424641	24428641	459.564	624
NA	ENSMUSG00000088609	2.29648	8.64132e-05	0.0019648	555130	92922.6	0.0586711	0.277149	0.211695	0.832345	0.983242	chr13	9832525	9836525	123.129	117
NA	ENSMUSG00000074564	3.18536	8.70353e-05	0.001975	1891.7	199.6	-0.453543	0.224978	-2.01594	0.0438059	0.721551	chr9	3013654	3017654	25265.1	23247
Col15a1	ENSMUSG00000028339	1.74322	8.75014e-05	0.00198311	48.3	14.2	0.323546	0.255417	1.26674	0.20525	0.971931	chr4	47206161	47210161	210.688	146
Slc17a9	ENSMUSG00000023393	2.693	8.88676e-05	0.00201158	379.1	87.9	-0.153256	0.2642	-0.580076	0.561863	0.971931	chr2	180723263	180727263	160.068	177
Cast	ENSMUSG00000021585	1.78542	8.93624e-05	0.00202028	837.4	249.5	-0.193602	0.258617	-0.748605	0.454095	0.971931	chr13	74806810	74810810	838.91	885
NA	ENSMUSG00000077928	-1.46283	9.01731e-05	0.00203357	7676.1	23154.2	-0.64416	0.261286	-2.46534	0.0136882	0.441727	chr14	54973776	54977776	146.387	255
3110001I22Rik	ENSMUSG00000079737	-1.499	9.00637e-05	0.00203357	60.7	200.6	-0.247084	0.253075	-0.976325	0.328903	0.971931	chr16	13669929	13673929	541.968	608
Inhba	ENSMUSG00000041324	2.8024	9.04046e-05	0.00203624	10.6	0.4	0.135056	0.262829	0.513855	0.607353	0.971931	chr13	16009851	16013851	239.418	195
NA	ENSMUSG00000055370	-2.29983	9.05144e-05	0.00203624	12	117.3	-0.0224487	0.260709	-0.0861064	0.931382	0.993455	chr16	43361666	43365666	1456.75	1548
Ndufa5	ENSMUSG00000023089	-2.03598	9.07385e-05	0.00203877	20.3	120	-0.27359	0.260231	-1.05133	0.293106	0.971931	chr6	24526013	24530013	715.938	820
Sec24d	ENSMUSG00000039234	1.6463	9.14513e-05	0.00205226	333	103.9	0.0411586	0.258606	0.159156	0.873546	0.987942	chr3	123265455	123269455	1185.93	982
Bcar1	ENSMUSG00000031955	1.76968	9.27563e-05	0.00207899	299.2	95	0.0565148	0.239962	0.235516	0.813808	0.981104	chr8	111741809	111745809	746.26	595
Rcor2	ENSMUSG00000024968	1.31112	9.31992e-05	0.00208636	197.8	75.5	-0.303077	0.238428	-1.27115	0.203676	0.971931	chr19	7265325	7269325	1463.92	2020
Sdcbp	ENSMUSG00000028249	-1.47253	9.36637e-05	0.00209286	80.6	250.7	-0.0153298	0.257498	-0.0595335	0.952527	0.994275	chr4	6363650	6367650	540.383	477
Lrrc59	ENSMUSG00000020869	1.66661	9.50548e-05	0.00211752	47.5	14.8	0.342888	0.262415	1.30666	0.191328	0.971931	chr11	94627767	94631767	202.479	134
NA	ENSMUSG00000086801	-1.92004	9.4975e-05	0.00211752	11.1	61.2	-0.104794	0.244153	-0.429214	0.667767	0.972431	chr15	58212475	58216475	1258.88	1447
Vwa7	ENSMUSG00000007030	2.00263	9.5982e-05	0.00213557	72.3	19.8	-0.11501	0.252775	-0.454989	0.649117	0.971931	chr17	35014579	35018579	218.896	232
ND6	ENSMUSG00000064368	-1.66838	9.63764e-05	0.00214174	123	438.1	NA	NA	NA	NA	NA	chrMT	12070	16070	0.127119	0.1
NA	ENSMUSG00000090965	-2.65632	9.68614e-05	0.0021499	0.3	17.4	-0.0431648	0.28513	-0.151386	0.879671	NA	chr19	59899062	59903062	40.6779	48
Usp22	ENSMUSG00000042506	1.70467	9.71734e-05	0.00215421	125.7	37.7	-0.443107	0.247934	-1.78719	0.0739063	0.833251	chr11	61173055	61177055	486.503	642
NA	ENSMUSG00000078875	-2.23431	9.81467e-05	0.00217315	4	38.2	-0.325054	0.253835	-1.28057	0.200344	NA	chr2	176998956	177002956	7.62711	19
Zhx1	ENSMUSG00000022361	-0.986232	9.84009e-05	0.00217614	124	253.1	-0.191107	0.252732	-0.756164	0.449551	0.971931	chr15	58074541	58078541	668.77	661
NA	ENSMUSG00000081590	-2.5059	9.93873e-05	0.00219529	3.6	48.1	-0.0825654	0.28402	-0.290703	0.771278	NA	chr2	177170870	177174870	45.7627	53
Klf7	ENSMUSG00000025959	1.39304	0.000100093	0.00220289	175.8	65	-0.0108041	0.252956	-0.0427112	0.965932	0.996544	chr1	64120282	64124282	1330.8	1170
Kcnb1	ENSMUSG00000050556	2.16726	0.000100033	0.00220289	158.4	37.3	0.00503955	0.247748	0.0203414	0.983771	0.997558	chr2	167188155	167192155	472.241	423
NA	ENSMUSG00000094605	-2.41513	0.000100014	0.00220289	55.3	723.4	0.0486457	0.27519	0.176771	0.859688	NA	chr16	43124233	43128233	91.5253	92
NA	ENSMUSG00000078887	-1.75909	0.000101508	0.00223133	17.3	73.1	-0.526822	0.277803	-1.89639	0.0579091	0.778698	chr2	175867219	175871219	72.4576	129
Zfp579	ENSMUSG00000051550	2.18554	0.0001022	0.00224386	208.9	48.4	0.0620526	0.266885	0.232507	0.816144	0.981104	chr7	4994158	4998158	244.89	212
Plekha4	ENSMUSG00000040428	2.64939	0.000102741	0.00225303	23.7	4.6	-0.153871	0.248148	-0.620079	0.535206	0.971931	chr7	45524330	45528330	983.782	1003
NA	ENSMUSG00000100212	3.03775	0.000103069	0.0022575	10.1	0.2	0.0534303	0.285046	0.187444	0.851312	NA	chr1	10803281	10807281	57.2033	58
Cherp	ENSMUSG00000052488	2.16342	0.000103198	0.00225763	566.8	140	-0.122644	0.267353	-0.458733	0.646426	0.971931	chr8	72473226	72477226	326.855	306
D8Ertd738e	ENSMUSG00000019362	1.94049	0.000103586	0.0022634	90.3	22.1	-0.158447	0.263352	-0.601657	0.547403	0.971931	chr8	84247719	84251719	244.012	239
Nfatc1	ENSMUSG00000033016	1.89053	0.000103742	0.00226351	310.2	90.6	-0.122396	0.244283	-0.501045	0.61634	0.971931	chr18	80711071	80715071	529.29	528
Myl1	ENSMUSG00000061816	1.99457	0.000103839	0.00226351	169.8	41.1	0.155542	0.279751	0.556003	0.578209	NA	chr1	66943404	66947404	88.983	75
Mamstr	ENSMUSG00000042918	2.15039	0.000104045	0.00226531	132.7	27.5	-0.282071	0.25795	-1.09351	0.274169	0.971931	chr7	45637977	45641977	497.596	567
Tmem245	ENSMUSG00000055296	-1.50337	0.000104365	0.00226956	74.4	238	-0.433047	0.248815	-1.74044	0.0817826	0.857518	chr4	56945437	56949437	695.723	911
F730043M19Rik	ENSMUSG00000052125	2.67363	0.000106635	0.00231618	26.5	4.2	-0.00522442	0.254058	-0.0205639	0.983594	0.997558	chr12	33145597	33149597	418.361	367
Acsl1	ENSMUSG00000018796	-1.38115	0.000107379	0.00232957	202	571.4	-0.116544	0.246508	-0.47278	0.63637	0.971931	chr8	46469037	46473037	791.743	728
NA	ENSMUSG00000043889	1.35632	0.000107645	0.00233256	2101.1	842	-0.215158	0.264639	-0.813024	0.416204	0.971931	chr13	81062684	81066684	112.184	134
Grin2d	ENSMUSG00000002771	2.34511	0.000108512	0.0023433	38.4	8.7	0.28759	0.258483	1.11261	0.265877	0.971931	chr7	45876378	45880378	199.743	144
Tpm3	ENSMUSG00000027940	1.97117	0.000108445	0.0023433	512.1	141.8	0.144319	0.271036	0.532473	0.594399	0.971931	chr3	90070649	90074649	102.966	92
Txnrd1	ENSMUSG00000020250	1.23374	0.000108526	0.0023433	133	56.1	0.174873	0.282774	0.618419	0.536299	NA	chr10	82831951	82835951	61.0169	52
Stk32a	ENSMUSG00000039954	2.49011	0.000108924	0.00234913	6.3	0.8	0.215935	0.276938	0.779722	0.435555	NA	chr18	43205583	43209583	90.2542	76
Akap13	ENSMUSG00000066406	1.46129	0.00010915	0.00235124	1125.6	417.2	-0.0391852	0.266791	-0.146876	0.88323	0.990253	chr7	75453534	75457534	749.629	625
Mthfd1l	ENSMUSG00000040675	2.92172	0.000110234	0.00237178	4.6	0.6	-0.247771	0.261651	-0.946954	0.343662	0.971931	chr10	3971118	3975118	149.123	179
Oxsr1	ENSMUSG00000036737	1.19421	0.000111386	0.00239376	238.2	103.2	-0.292094	0.250133	-1.16776	0.242906	0.971931	chr9	119320427	119324427	747.944	864
Nr1h2	ENSMUSG00000060601	1.63221	0.000111528	0.00239398	446.1	146.2	-0.12036	0.271201	-0.443802	0.657186	0.972431	chr7	44551951	44555951	206.584	214
NA	ENSMUSG00000097183	2.23525	0.000111946	0.00240015	44.5	6.8	0.0130749	0.248223	0.052674	0.957992	0.995102	chr3	145648312	145652312	1266.05	1297
Gse1	ENSMUSG00000031822	2.4	0.000112127	0.0024012	279.7	64.4	0.105451	0.242533	0.43479	0.663715	0.972431	chr8	120226456	120230456	556.23	450
Heatr5a	ENSMUSG00000035181	1.39121	0.000112465	0.00240477	106.7	41.3	-0.160304	0.274419	-0.584157	0.559114	0.971931	chr12	51969321	51973321	747.944	700
Ano6	ENSMUSG00000064210	1.48852	0.000112669	0.00240477	27.3	9.6	0.20412	0.259726	0.785907	0.431922	0.971931	chr15	95788843	95792843	251.731	191
NA	ENSMUSG00000076258	2.2814	0.000112688	0.00240477	1.29219e+06	212542	0.0569459	0.273323	0.208346	0.834959	0.983464	chr16	11142125	11146125	749.629	657
Ddn	ENSMUSG00000059213	2.70193	0.00011291	0.00240668	7.2	1	0.16976	0.263849	0.643397	0.519966	0.971931	chr15	98807490	98811490	213.424	168
NA	ENSMUSG00000093336	2.026	0.000114508	0.0024379	5042.8	1167	-0.241837	0.256748	-0.941924	0.346232	0.971931	chr2	32650329	32654329	166.909	200
Ppp1r13l	ENSMUSG00000040734	1.79826	0.000115295	0.00245143	310	93.9	-0.140976	0.257011	-0.548523	0.583333	0.971931	chr7	19357749	19361749	975.36	959
Gpr157	ENSMUSG00000047875	-1.70608	0.000115412	0.00245143	75.9	307.8	-0.117424	0.242489	-0.484247	0.628211	0.971931	chr4	150085365	150089365	1243.2	1219
Ankrd27	ENSMUSG00000034867	1.55422	0.000115705	0.00245237	109.8	37.2	-0.269452	0.263636	-1.02206	0.306752	0.971931	chr7	35584244	35588244	191.534	235
Wasf2	ENSMUSG00000028868	1.68713	0.000115725	0.00245237	227	73.7	0.0529224	0.247633	0.213713	0.830771	0.982981	chr4	133128505	133132505	1009.05	847
Atf6b	ENSMUSG00000015461	2.12669	0.000116089	0.00245724	172.1	42	-0.271291	0.264138	-1.02708	0.304383	0.971931	chr17	34645146	34649146	247.024	272
Fbxl19	ENSMUSG00000030811	2.21471	0.000116648	0.00246621	156.4	40.4	-0.194641	0.258249	-0.753694	0.451033	0.971931	chr7	127742543	127746543	507.105	525
NA	ENSMUSG00000098889	-2.11241	0.000116872	0.0024681	8.6	55.4	-0.147709	0.265932	-0.555439	0.578594	0.971931	chr2	160749909	160753909	117.657	133
Rassf7	ENSMUSG00000038618	2.97649	0.000117131	0.00247072	8.2	0.2	0.133231	0.260076	0.512276	0.608458	0.971931	chr7	141213860	141217860	191.534	161
NA	ENSMUSG00000058126	2.12732	0.000118298	0.00249244	316.2	76.9	0.34795	0.285457	1.21892	0.222873	NA	chr14	113312608	113316608	47.0339	31
Col18a1	ENSMUSG00000001435	2.16009	0.000118612	0.00249618	6.6	1.2	-0.0995858	0.280343	-0.355228	0.722419	NA	chr10	77164548	77168548	68.644	83
Selenbp1	ENSMUSG00000068874	-1.85217	0.000119745	0.00251525	31.5	159.5	-0.698799	0.245921	-2.84156	0.00448928	0.264057	chr3	94931056	94935056	315.356	558
Tjp2	ENSMUSG00000024812	1.9336	0.000119793	0.00251525	81.6	20.4	0.129173	0.242113	0.533523	0.593671	0.971931	chr19	24223030	24227030	456.394	369
Atf3	ENSMUSG00000026628	2.54248	0.000120007	0.00251684	69.8	9.2	0.6606	0.258807	2.55248	0.010696	0.395425	chr1	191216039	191220039	213.424	106
Dusp8	ENSMUSG00000037887	1.41959	0.000120421	0.00252264	90.8	34.8	-0.141564	0.240517	-0.588582	0.556142	0.971931	chr7	142093843	142097843	751.313	719
Magi1	ENSMUSG00000045095	1.88057	0.000121016	0.00253219	361.1	104.6	0.229028	0.244832	0.935447	0.349558	0.971931	chr6	94281917	94285917	719.455	510
39692	ENSMUSG00000018398	1.9523	0.000121587	0.00254122	520.7	143.4	-0.0359218	0.249321	-0.144078	0.885439	0.990253	chr11	53517257	53521257	719.307	606
Foxc2	ENSMUSG00000046714	3.0998	0.000122823	0.00256413	3.6	0.2	-0.148988	0.273338	-0.54507	0.585706	0.971931	chr8	121114171	121118171	94.0677	116
Mical3	ENSMUSG00000051586	2.23036	0.000123355	0.00257229	2311.9	560.4	-0.0114561	0.263929	-0.0434062	0.965378	0.996473	chr6	121128999	121132999	186.062	174
Bphl	ENSMUSG00000038286	-2.09177	0.000125521	0.00261447	1.9	20.3	-0.310133	0.25327	-1.22452	0.220757	0.971931	chr13	34035597	34039597	356.558	425
Camkk2	ENSMUSG00000029471	1.65578	0.000126432	0.00262822	25.8	7.7	-0.132162	0.252904	-0.522575	0.60127	0.971931	chr5	122777409	122781409	198.375	211
Aaas	ENSMUSG00000036678	2.14234	0.000126469	0.00262822	118.2	28.7	-0.178988	0.2619	-0.683422	0.49434	0.971931	chr15	102348771	102352771	322.337	321
Arid5a	ENSMUSG00000037447	1.29633	0.000126867	0.00263351	121.9	48.6	0.425024	0.246308	1.72558	0.0844236	0.865149	chr1	36305733	36309733	540.383	322
Phf1	ENSMUSG00000024193	1.9554	0.000127301	0.00263952	344.1	98.6	-0.281891	0.247696	-1.13805	0.255098	0.971931	chr17	26931052	26935052	397.76	456
Tada3	ENSMUSG00000048930	1.7543	0.00012798	0.00265057	247.9	75	0.0821417	0.243868	0.336829	0.736246	0.97486	chr6	113375883	113379883	825.434	633
Helz2	ENSMUSG00000027580	1.79724	0.000128179	0.00265169	50.6	13.6	-0.0581528	0.262102	-0.221871	0.824414	0.982508	chr2	181240027	181244027	166.909	168
NA	ENSMUSG00000087040	-2.53516	0.000128522	0.00265578	0.7	9.8	0.37932	0.285422	1.32898	0.183856	NA	chr2	55409790	55413790	48.305	30
Fnip2	ENSMUSG00000061175	-1.59701	0.000128844	0.00265943	139.6	449.3	-0.126507	0.268837	-0.470571	0.637947	0.971931	chr3	79565796	79569796	366.018	344
Peg3	ENSMUSG00000002265	2.09313	0.000129321	0.00266326	354.8	88.7	-0.198926	0.243521	-0.816876	0.413999	0.971931	chr7	6728431	6732431	386.667	409
NA	ENSMUSG00000093677	-1.87011	0.000129212	0.00266326	35.1	147.4	-0.313971	0.278132	-1.12885	0.25896	0.971931	chr15	58779951	58783951	123.129	164
Ptms	ENSMUSG00000030122	1.91529	0.000129971	0.00267362	334.8	92.2	0.127952	0.256148	0.499523	0.617411	0.971931	chr6	124918103	124922103	667.159	512
Ccrl2	ENSMUSG00000043953	-2.15299	0.000130134	0.00267397	1.3	8.6	-0.585864	0.249191	-2.35106	0.0187198	0.500494	chr9	111055519	111059519	386.667	589
Tlr5	ENSMUSG00000079164	2.37666	0.000130417	0.00267676	5.7	0.7	0.289476	0.250858	1.15394	0.248523	0.971931	chr1	182952788	182956788	220.265	162
Dnajc25	ENSMUSG00000070972	-1.85928	0.000131064	0.00268704	24.2	117	0.262858	0.273882	0.959749	0.337182	NA	chr4	58993062	58997062	94.0677	74
Apol6	ENSMUSG00000033576	1.90897	0.000131501	0.00269297	31.6	8.3	0.310467	0.269052	1.15393	0.248528	0.971931	chr15	77042729	77046729	472.961	285
Ubp1	ENSMUSG00000009741	1.43403	0.000132949	0.00271855	379.2	142.4	-0.299373	0.258323	-1.15891	0.246492	0.971931	chr9	113928934	113932934	499.181	595
Dgkh	ENSMUSG00000034731	1.74538	0.000133048	0.00271855	15	4.2	-0.0287792	0.251648	-0.114363	0.90895	0.990886	chr14	78730776	78734776	209.32	208
Ccdc117	ENSMUSG00000020482	-1.91269	0.000133524	0.00272219	7.4	38.4	-0.13038	0.247646	-0.526477	0.598557	0.971931	chr11	5540187	5544187	429.454	428
NA	ENSMUSG00000091487	-3.02216	0.000133431	0.00272219	0.3	18.7	0.183903	0.282467	0.651059	0.515008	NA	chr5	10065365	10069365	55.9322	47
Mical2	ENSMUSG00000038244	1.3797	0.000134081	0.0027305	3069.3	1212.6	0.2462	0.25745	0.956303	0.338919	0.971931	chr7	112223856	112227856	963.568	619
NA	ENSMUSG00000059195	1.30934	0.000136005	0.0027666	3502.7	1449.5	0.0683912	0.269022	0.254222	0.799324	0.980421	chr4	103561402	103565402	100.424	97
Pigr	ENSMUSG00000026417	2.94361	0.000136915	0.00278201	3.5	0.6	0.249612	0.277989	0.897923	0.369227	NA	chr1	130824684	130828684	81.3559	66
Rbp7	ENSMUSG00000028996	-2.87615	0.000138108	0.00280218	1.1	37.2	-0.577112	0.265971	-2.16983	0.0300196	0.626289	chr4	149452978	149456978	127.234	210
Utp14b	ENSMUSG00000079470	-2.06645	0.000138215	0.00280218	3.8	26.1	-0.308421	0.265777	-1.16045	0.245865	0.971931	chr1	78656038	78660038	166.909	211
Cpeb2	ENSMUSG00000039782	1.79605	0.000138962	0.00281299	258.8	81.2	-0.00938989	0.247441	-0.0379481	0.969729	0.996544	chr5	43231170	43235170	1159.95	1200
NA	ENSMUSG00000084858	-1.85936	0.000139055	0.00281299	6.4	30.5	0.152259	0.264744	0.575118	0.565211	NA	chr2	176296827	176300827	16.5254	12
Abcg2	ENSMUSG00000029802	2.02593	0.000139944	0.00282782	64.9	16.9	0.0861088	0.283717	0.303502	0.761507	NA	chr6	58582523	58586523	63.5593	62
Mzb1	ENSMUSG00000024353	-2.45572	0.000140659	0.00283914	2.2	47.1	-0.611305	0.260181	-2.34954	0.0187965	0.501249	chr18	35647367	35651367	113.553	199
Tmem37	ENSMUSG00000050777	-3.0446	0.00014094	0.00284167	0.1	9	-0.248163	0.267155	-0.928911	0.352935	0.971931	chr1	120072074	120076074	317.818	338
Ms4a7	ENSMUSG00000024672	2.46532	0.000142132	0.00286255	7.3	1.1	0.591439	0.283517	2.08608	0.0369718	NA	chr19	11334146	11338146	73.7287	35
Rbm4b	ENSMUSG00000033760	-1.6009	0.000142424	0.00286527	135.3	501.5	-0.261016	0.25393	-1.0279	0.303995	0.971931	chr19	4754497	4758497	432.624	490
S1pr2	ENSMUSG00000043895	2.50409	0.000143849	0.00289075	9.2	0.9	0.440298	0.252977	1.74047	0.0817769	0.857518	chr9	20974781	20978781	400.661	225
NA	ENSMUSG00000098412	-2.76446	0.00014443	0.00289605	0.7	18.3	-0.114783	0.272613	-0.421046	0.673721	0.972431	chr9	72207555	72211555	205.215	209
Hr	ENSMUSG00000022096	2.01847	0.000144386	0.00289605	73	17.6	-0.0598516	0.254488	-0.235184	0.814066	0.981104	chr14	70550212	70554212	454.809	423
NA	ENSMUSG00000089659	1.7374	0.000144734	0.00289896	264.9	68.8	-0.00448727	0.285468	-0.015719	0.987459	NA	chr5	99020222	99024222	47.0339	51
Bak1	ENSMUSG00000057789	1.57626	0.000144974	0.00290059	197.8	69.9	0.0985026	0.265012	0.371691	0.710123	0.974839	chr17	27027009	27031009	334.387	251
NA	ENSMUSG00000044694	-1.96701	0.000146047	0.00291887	12	71	-0.284218	0.244425	-1.1628	0.24491	0.971931	chr9	51276513	51280513	766.474	869
Atxn1l	ENSMUSG00000069895	1.5767	0.000146392	0.00292256	63.7	20.2	0.194897	0.266788	0.730534	0.465064	0.971931	chr8	109735739	109739739	221.633	169
NA	ENSMUSG00000056366	-1.47153	0.000146648	0.00292447	351.4	1120.3	-0.149449	0.272013	-0.549418	0.582718	0.971931	chr10	86730388	86734388	100.424	120
Ppp4r1l-ps	ENSMUSG00000055897	2.3667	0.000147082	0.00292992	678.7	169.5	-0.0943706	0.243044	-0.388285	0.697805	0.973963	chr2	173657640	173661640	481.749	466
Scaf1	ENSMUSG00000038406	2.34849	0.000148552	0.00295599	475.6	121.6	0.0997083	0.256765	0.388325	0.697776	0.973963	chr7	45014363	45018363	1253.31	972
NA	ENSMUSG00000073485	-1.88141	0.000150641	0.00299105	4.7	22.2	-0.323389	0.250296	-1.29203	0.196348	0.971931	chr1	180811776	180815776	534.045	632
Meox1	ENSMUSG00000001493	2.29016	0.000151869	0.00299912	18.2	2.6	-0.359563	0.257038	-1.39887	0.161851	0.95765	chr11	101892374	101896374	181.958	241
NA	ENSMUSG00000020485	-2.50096	0.000151707	0.00299912	4.1	105.5	-0.274937	0.267656	-1.0272	0.304325	0.971931	chr11	87735552	87739552	340.412	373
Nr4a1	ENSMUSG00000023034	1.94454	0.000151575	0.00299912	516.1	131.3	0.17362	0.25012	0.694147	0.48759	0.971931	chr15	101252269	101256269	551.476	414
Pard6b	ENSMUSG00000044641	2.38613	0.000151545	0.00299912	13.8	2.7	0.118483	0.260118	0.455496	0.648752	0.971931	chr2	168079004	168083004	359.993	270
NA	ENSMUSG00000099428	-2.88492	0.000151558	0.00299912	1.5	54.9	0.336835	0.256047	1.31552	0.188336	0.971931	chr13	9138881	9142881	326.855	202
Lztr1	ENSMUSG00000022761	1.37325	0.000152252	0.00300345	75.7	29.2	-0.424307	0.269383	-1.5751	0.115233	0.909995	chr16	17506688	17510688	301.249	388
Asap2	ENSMUSG00000052632	1.28329	0.000153137	0.00301765	121.4	49.6	-0.014257	0.273844	-0.0520625	0.958479	NA	chr12	20988459	20992459	83.8982	89
Tpgs2	ENSMUSG00000024269	-1.41679	0.000153597	0.00302018	61.8	188.1	-0.233588	0.262634	-0.889404	0.373786	0.971931	chr18	25167007	25171007	280.162	294
NA	ENSMUSG00000064558	2.54978	0.000153559	0.00302018	511.3	99.6	-0.11824	0.27974	-0.422678	0.67253	NA	chr13	46765649	46769649	66.1016	79
Polr2l	ENSMUSG00000038489	-1.97517	0.000153827	0.00302146	8.5	46.3	0.186657	0.252284	0.739868	0.45938	0.971931	chr7	141473132	141477132	1106.76	805
Itga3	ENSMUSG00000001507	1.77098	0.00015575	0.00305266	117.7	33.7	-0.14544	0.249892	-0.582012	0.560558	0.971931	chr11	95074801	95078801	500.766	513
2610203C22Rik	ENSMUSG00000079671	-2.02574	0.000155608	0.00305266	7.6	51.9	0.142095	0.248335	0.57219	0.567193	0.971931	chr1	9629175	9633175	1438.11	1335
Scrib	ENSMUSG00000022568	2.13786	0.000157684	0.00308726	159.2	43	-0.126182	0.251801	-0.501117	0.616289	0.971931	chr15	76067784	76071784	265.099	254
Slc9a1	ENSMUSG00000028854	2.09564	0.000158101	0.00309211	408	106.3	-0.0839844	0.257326	-0.326374	0.744142	0.977116	chr4	133367706	133371706	699.092	618
LOC102638460	ENSMUSG00000087172	-2.56122	0.000161673	0.00315522	0.6	13.5	-0.566974	0.268873	-2.10871	0.03497	0.673202	chr11	43957089	43961089	372.405	577
Stap2	ENSMUSG00000038781	1.70143	0.000161562	0.00315522	975.6	320.3	-0.30198	0.258417	-1.16858	0.242575	0.971931	chr17	56003584	56007584	190.166	235
NA	ENSMUSG00000074978	1.17301	0.000162527	0.00316849	302.3	132.8	-0.596739	0.266548	-2.23877	0.0251709	0.578554	chr8	46226994	46230994	149.123	251
Tjap1	ENSMUSG00000012296	1.92203	0.000164049	0.00318797	827.1	245.9	0.326476	0.253164	1.28959	0.197195	0.971931	chr17	46281026	46285026	499.181	323
Acaa2	ENSMUSG00000036880	-2.09146	0.000163979	0.00318797	11.6	56.7	-0.22246	0.250703	-0.887344	0.374894	0.971931	chr18	74777197	74781197	1180.88	1268
Hdac5	ENSMUSG00000008855	2.27041	0.000163798	0.00318797	800.3	205.2	-0.0622843	0.245738	-0.253459	0.799914	0.980421	chr11	102228166	102232166	682.246	596
Adamtsl2	ENSMUSG00000036040	2.18153	0.000164338	0.00319019	26.1	4.3	-0.0150523	0.26334	-0.057159	0.954419	0.994769	chr2	27077379	27081379	314.805	266
Adamts10	ENSMUSG00000024299	1.60596	0.000164732	0.00319135	95.8	31.7	-0.136151	0.266957	-0.510011	0.610044	0.971931	chr17	33522204	33526204	145.019	160
NA	ENSMUSG00000099858	-2.40713	0.000164748	0.00319135	5.1	50	-0.107119	0.28544	-0.375279	0.707453	NA	chr1	153618673	153622673	41.9491	52
Phc1	ENSMUSG00000040669	2.35765	0.000165095	0.00319276	147.3	34.6	-0.123301	0.273761	-0.450397	0.652424	0.971931	chr6	122338561	122342561	173.749	180
NA	ENSMUSG00000088938	-2.97082	0.00016517	0.00319276	1.8	112.7	-0.06212	0.267592	-0.232144	0.816426	0.981104	chr14	49786284	49790284	157.332	158
NA	ENSMUSG00000081599	-2.79546	0.000166005	0.0032055	0.2	6.1	-0.165473	0.226277	-0.731285	0.464605	NA	chr2	176755439	176759439	5.08474	9
Mapre3	ENSMUSG00000029166	1.88848	0.000167191	0.00322501	151	43.7	-0.0835008	0.24567	-0.339891	0.733939	0.97486	chr5	30812641	30816641	367.524	340
Adamts7	ENSMUSG00000032363	-1.79496	0.000167726	0.00322511	47.8	189.4	-1.08701	0.250277	-4.34323	1.40405e-05	0.00711154	chr9	90161069	90165069	414.402	1012
Mrgprh	ENSMUSG00000059408	-2.78838	0.000167581	0.00322511	0.3	34.5	-0.790417	0.269982	-2.92767	0.00341514	0.234532	chr17	12874034	12878034	95.7672	215
Flot2	ENSMUSG00000061981	1.79137	0.000167692	0.00322511	164.4	45.5	-0.263354	0.261906	-1.00553	0.314642	0.971931	chr11	78035931	78039931	247.024	268
Synpo2	ENSMUSG00000050315	1.78089	0.000168758	0.00323658	338.1	98.6	-0.391677	0.259638	-1.50855	0.131414	0.935085	chr3	123234149	123238149	902.924	1142
Fabp3	ENSMUSG00000028773	-1.42415	0.000168916	0.00323658	452	1393.7	-0.11021	0.249934	-0.440956	0.659245	0.972431	chr4	130306595	130310595	1294.73	1531
Bcat1	ENSMUSG00000030268	2.69693	0.000169032	0.00323658	3.2	0.3	0.176207	0.277888	0.634095	0.526019	NA	chr6	145074184	145078184	74.9999	63
Timd4	ENSMUSG00000055546	-2.92127	0.00016858	0.00323658	0.1	5.6	-0.0584826	0.273952	-0.213478	0.830954	NA	chr11	46808800	46812800	88.983	101
Ascc2	ENSMUSG00000020412	1.78727	0.000169792	0.00324435	354	109.1	0.236285	0.252111	0.937226	0.348642	0.971931	chr11	4635747	4639747	654.482	458
NA	ENSMUSG00000057160	2.81174	0.000169617	0.00324435	44.2	7.3	-0.0797529	0.271035	-0.294253	0.768564	NA	chr12	24491656	24495656	86.4406	98
Scn10a	ENSMUSG00000034533	2.44472	0.000171115	0.0032662	353.9	80.2	-0.154879	0.283689	-0.545946	0.585103	NA	chr9	119717322	119721322	50.8474	67
Fhod1	ENSMUSG00000014778	1.4156	0.000173088	0.00330042	153.2	57.4	0.00308969	0.237197	0.0130259	0.989607	0.999297	chr8	105345953	105349953	913.031	803
Gm7457	ENSMUSG00000072683	-1.60815	0.000173284	0.00330071	6.9	23.6	0.0115618	0.271355	0.0426078	0.966014	NA	chr6	142812231	142816231	87.7118	88
Nat6	ENSMUSG00000079334	1.67984	0.000173575	0.00330281	120.8	39.4	0.246654	0.252596	0.976477	0.328828	0.971931	chr9	107576887	107580887	670.329	470
Arhgef18	ENSMUSG00000004568	1.54412	0.000173781	0.00330329	200.4	72.4	0.133206	0.270616	0.492232	0.622555	NA	chr8	3351415	3355415	97.8813	89
Med12	ENSMUSG00000079487	1.42765	0.000174415	0.00331096	339.2	128.8	-0.157442	0.27719	-0.567993	0.57004	0.971931	chrX	101272030	101276030	166.909	180
Syngap1	ENSMUSG00000067629	1.76229	0.000174547	0.00331096	137.5	36.7	-0.104149	0.258366	-0.403107	0.68687	0.972431	chr17	26939253	26943253	380.328	361
NA	ENSMUSG00000066697	2.74716	0.000175415	0.00332397	67.1	16.9	-0.0850863	0.284418	-0.29916	0.764818	NA	chr7	71330921	71334921	50.8474	63
Akap17b	ENSMUSG00000059708	1.92997	0.000175648	0.00332493	26.9	7.7	-0.0360198	0.275564	-0.130713	0.896002	0.990253	chrX	36643395	36647395	104.237	106
Asb2	ENSMUSG00000021200	-1.05296	0.000175875	0.00332558	569.2	1233.9	-0.347265	0.254388	-1.3651	0.172221	0.964888	chr12	103354001	103358001	1221.6	1728
Mb	ENSMUSG00000018893	-1.1838	0.000176046	0.00332558	1518.9	3650.4	-0.0157877	0.276381	-0.0571229	0.954447	NA	chr15	77048670	77052670	91.5253	100
Adora1	ENSMUSG00000042429	2.19868	0.000178139	0.00336164	284.1	61.1	-0.0867523	0.24716	-0.350997	0.725591	0.974849	chr1	134233431	134237431	970.306	911
Itga1	ENSMUSG00000042284	1.34444	0.000178514	0.00336524	72	28.2	0.0353632	0.256279	0.137987	0.89025	0.990253	chr13	115099964	115103964	811.957	638
Ldlr	ENSMUSG00000032193	1.9256	0.000179347	0.00337746	21.2	4.7	-0.200434	0.250334	-0.800666	0.423325	0.971931	chr9	21721483	21725483	537.214	573
Zfp933	ENSMUSG00000059423	-1.69221	0.000179876	0.00338393	17.1	68.2	-0.198186	0.2624	-0.755282	0.45008	0.971931	chr4	147846366	147850366	263.593	268
2500004C02Rik	ENSMUSG00000073236	-1.78514	0.000181128	0.00340398	11.6	50.1	-0.248505	0.256287	-0.969637	0.332228	0.971931	chr2	153344073	153348073	709.199	744
Hmox1	ENSMUSG00000005413	2.28699	0.000181541	0.00340823	30.1	3.8	0.373806	0.273231	1.36809	0.171282	0.963345	chr8	75091621	75095621	344.93	191
9230104L09Rik	ENSMUSG00000027446	-2.93336	0.000182042	0.00341082	0.5	31.1	-0.463469	0.267117	-1.73507	0.0827276	0.861482	chr2	148863038	148867038	613.179	787
Inf2	ENSMUSG00000037679	2.08899	0.000182052	0.00341082	69.4	13	0.308352	0.251406	1.22651	0.220006	0.971931	chr12	112586784	112590784	233.946	167
D3Ertd751e	ENSMUSG00000025766	-2.19543	0.000183428	0.00342807	21.1	214.5	-0.405718	0.270099	-1.50211	0.133069	0.935085	chr3	41740611	41744611	337.542	445
Maged1	ENSMUSG00000025151	1.05573	0.000183164	0.00342807	330.1	158.6	-0.346125	0.272832	-1.26864	0.20457	0.971931	chrX	94540143	94544143	277.149	331
Xirp1	ENSMUSG00000079243	1.98086	0.000183536	0.00342807	2227.8	608.7	-0.24012	0.24114	-0.995769	0.319362	0.971931	chr9	120021598	120025598	1218.74	1623
Itga7	ENSMUSG00000025348	1.72679	0.00018478	0.00344777	310.4	99.2	-0.22045	0.243614	-0.904914	0.365511	0.971931	chr10	128931818	128935818	1251.71	1627
Dopey2	ENSMUSG00000022946	1.74995	0.000186204	0.0034708	103.3	31.1	-0.215458	0.251575	-0.856436	0.391757	0.971931	chr16	93709904	93713904	274.137	287
Erbb4	ENSMUSG00000062209	-1.48298	0.000186843	0.00347916	25.2	81	-0.370742	0.235955	-1.57124	0.116126	0.912297	chr1	69106059	69110059	955.145	1190
Dhrs3	ENSMUSG00000066026	-1.45126	0.000187414	0.00348624	96.2	305.8	-0.137051	0.246697	-0.555542	0.578524	0.971931	chr4	144890827	144894827	1230.21	1469
Bbc3	ENSMUSG00000002083	2.81553	0.000189887	0.00352865	20.2	1.9	0.233424	0.25987	0.898234	0.369061	0.971931	chr7	16306393	16310393	373.549	253
Angpt1	ENSMUSG00000022309	-2.02335	0.000190475	0.00353239	3.2	19.8	-0.470873	0.252907	-1.86184	0.0626255	0.795489	chr15	42674977	42678977	724.36	988
NA	ENSMUSG00000101953	-1.60895	0.000191042	0.00353931	25.3	86.1	0.118149	0.28471	0.414979	0.678157	NA	chr9	97226895	97230895	53.3898	49
Polr3k	ENSMUSG00000038628	-2.26138	0.000193919	0.00358898	2.3	34.8	0.0283047	0.262845	0.107686	0.914245	0.990886	chr2	181862337	181866337	201.111	183
Gtf2f1	ENSMUSG00000002658	2.42316	0.000194624	0.00359838	427	106.4	-0.376289	0.267976	-1.40419	0.160262	0.957137	chr17	57009288	57013288	244.012	298
Clec18a	ENSMUSG00000033633	-2.77411	0.000195249	0.00360628	0.2	8.8	-0.560638	0.264556	-2.11917	0.0340764	0.670828	chr8	111090426	111094426	424.7	645
Cfap43	ENSMUSG00000044948	-1.89112	0.000196483	0.00362541	24.1	126.9	-0.175633	0.247313	-0.710165	0.477602	0.971931	chr19	47917287	47921287	1453.88	1791
Hopx	ENSMUSG00000059325	-2.63145	0.000196841	0.00362834	2.4	63.9	-0.681311	0.264052	-2.58022	0.00987376	0.386141	chr5	77113121	77117121	495.26	795
Zmiz1	ENSMUSG00000007817	1.80268	0.00019779	0.00364169	467.9	148.2	-0.223211	0.239587	-0.931651	0.351517	0.971931	chr14	25457185	25461185	1373.59	1774
Amot	ENSMUSG00000041688	2.23189	0.000197963	0.00364169	11.8	2.1	0.0300858	0.276907	0.108649	0.913481	0.990886	chrX	145503181	145507181	143.651	127
Ubxn2a	ENSMUSG00000020634	-1.20046	0.000200388	0.00368258	44.4	108.3	-0.173688	0.257177	-0.675365	0.499444	0.971931	chr12	4905705	4909705	391.421	405
Tnfrsf14	ENSMUSG00000042333	-2.60514	0.000201882	0.0037026	0.5	21.1	0.181137	0.249297	0.726593	0.467475	0.971931	chr4	154926563	154930563	453.225	341
NA	ENSMUSG00000097155	-1.75107	0.000201709	0.0037026	7.6	32.8	-0.210976	0.25049	-0.842253	0.399646	0.971931	chr9	21721450	21725450	541.968	584
Upp2	ENSMUSG00000026839	-2.77312	0.000202845	0.00371651	0.3	10.5	-0.287419	0.247161	-1.16288	0.244878	0.971931	chr2	58565298	58569298	943.353	1074
Pde9a	ENSMUSG00000041119	-2.87014	0.000203055	0.00371665	0.1	4.7	-0.026205	0.253727	-0.10328	0.917741	0.991332	chr17	31384210	31388210	175.117	171
Zfp879	ENSMUSG00000044296	-2.28739	0.0002058	0.00376312	2	27	-0.397734	0.271842	-1.46311	0.143438	0.942087	chr11	50839552	50843552	161.436	224
Fcer2a	ENSMUSG00000005540	-2.55167	0.00020697	0.00378071	0.6	12.6	-0.298844	0.282163	-1.05912	0.289547	NA	chr8	3692175	3696175	44.4915	67
Acd	ENSMUSG00000038000	2.02693	0.000207673	0.00378719	112	31.9	-0.171783	0.271641	-0.632389	0.527133	0.971931	chr8	105699102	105703102	313.299	313
Zdhhc18	ENSMUSG00000037553	1.77121	0.000207946	0.00378719	38.8	11.9	0.0979646	0.266022	0.368257	0.712681	0.974839	chr4	133648154	133652154	145.019	125
Slc35f5	ENSMUSG00000026342	1.25273	0.000207833	0.00378719	402	168.5	0.0910082	0.250702	0.363014	0.716595	0.974849	chr1	125558595	125562595	1527	1437
9530026P05Rik	ENSMUSG00000097462	-1.96611	0.000208553	0.0037935	4.9	24.9	-0.61961	0.253808	-2.44125	0.0146363	0.450548	chr6	92938329	92942329	445.301	709
Slc10a1	ENSMUSG00000021135	-1.57248	0.000208708	0.0037935	29.2	107.3	-0.302917	0.282797	-1.07115	0.284103	NA	chr12	80966705	80970705	43.2203	66
Fads3	ENSMUSG00000024664	1.36832	0.000209077	0.00379642	171.9	67.4	-0.241238	0.247679	-0.973996	0.330059	0.971931	chr19	10039569	10043569	1140.45	1265
Usp35	ENSMUSG00000035713	2.26823	0.000210982	0.00382722	37.4	9.8	0.134289	0.263044	0.51052	0.609687	0.971931	chr7	97330020	97334020	347.943	254
NA	ENSMUSG00000083170	-1.89979	0.00021163	0.00383516	5.9	31.6	-0.0305053	0.252095	-0.121007	0.903685	NA	chr2	176853548	176857548	11.4407	13
Nedd9	ENSMUSG00000021365	1.84049	0.000212147	0.00384073	226	68.1	-0.132256	0.261471	-0.505815	0.612987	0.971931	chr13	41485362	41489362	169.645	178
Prrc2a	ENSMUSG00000024393	2.0002	0.000212386	0.00384124	966.6	288.4	-0.232039	0.259421	-0.894449	0.371082	0.971931	chr17	35162897	35166897	568.908	618
Dennd4a	ENSMUSG00000053641	1.34605	0.000212692	0.00384298	38.9	15.3	0.0641551	0.25901	0.247693	0.804372	0.980513	chr9	64809340	64813340	224.369	196
Cdh22	ENSMUSG00000053166	2.81606	0.000213369	0.00385127	19.2	1.6	0.13068	0.259393	0.50379	0.614409	0.971931	chr2	165232853	165236853	179.221	150
NA	ENSMUSG00000100313	-2.84764	0.000213573	0.00385127	0.1	4.3	-0.294888	0.276811	-1.0653	0.286738	0.971931	chr1	51877608	51881608	110.816	144
Dock6	ENSMUSG00000032198	1.88157	0.000214564	0.00386532	109.4	32.5	-0.344325	0.257055	-1.3395	0.180407	0.971931	chr9	21850635	21854635	138.178	184
Kifc5b	ENSMUSG00000024301	2.29102	0.000215553	0.00387932	16	2.8	-0.186769	0.267081	-0.699297	0.484367	0.971931	chr17	26915091	26919091	142.283	162
Flot1	ENSMUSG00000059714	1.1578	0.000216015	0.00388381	633.8	278.2	-0.163527	0.246937	-0.662224	0.507828	0.971931	chr17	35821230	35825230	1088.23	1120
Apc2	ENSMUSG00000020135	1.85103	0.000217551	0.00390758	61.9	17.9	-0.1635	0.258574	-0.632315	0.527181	0.971931	chr10	80293977	80297977	317.818	312
Gpcpd1	ENSMUSG00000027346	-2.10616	0.000217931	0.00391055	101.7	787.7	0.0156868	0.266104	0.0589501	0.952992	0.994327	chr2	132585729	132589729	140.915	131
Plekhm1	ENSMUSG00000034247	1.44126	0.000221171	0.00396481	224.9	85.9	-0.00959643	0.245235	-0.0391315	0.968786	0.996544	chr11	103410687	103414687	396.175	353
Tango2	ENSMUSG00000013539	-1.50133	0.000221525	0.00396725	127.6	435.5	-0.60953	0.249116	-2.44677	0.0144142	0.449278	chr16	18346103	18350103	335.957	535
Pfkfb2	ENSMUSG00000026409	-1.37474	0.000225351	0.00403181	493.7	1366.2	-0.0702448	0.280257	-0.250644	0.802089	NA	chr1	130727253	130731253	69.9152	79
NA	ENSMUSG00000074807	-2.51165	0.00022581	0.00403607	0.7	22.8	-0.0681639	0.262222	-0.259947	0.794904	0.980398	chr2	128966044	128970044	1216.25	1115
NA	ENSMUSG00000095940	-2.28303	0.000226596	0.00404222	3.7	48.8	-0.0852895	0.273964	-0.311316	0.755561	NA	chr13	103395109	103399109	74.9999	87
Iars	ENSMUSG00000037851	1.07042	0.000227452	0.00405353	372.6	174.4	-0.224571	0.267749	-0.838736	0.401618	0.971931	chr13	49680100	49684100	483.334	526
Gas8	ENSMUSG00000040220	2.08812	0.000229083	0.00407861	92.1	20.5	0.183045	0.266531	0.686769	0.492228	0.971931	chr8	123516834	123520834	135.442	108
NA	ENSMUSG00000081712	-1.55818	0.00022998	0.0040906	169.3	593.8	0.116918	0.279166	0.41881	0.675355	NA	chr11	30526295	30530295	67.3728	60
Brpf3	ENSMUSG00000063952	1.47755	0.00023145	0.00411274	113.8	41	-0.393617	0.264023	-1.49085	0.136002	0.937794	chr17	28799090	28803090	311.793	383
Sgip1	ENSMUSG00000028524	-1.71758	0.000232803	0.00413275	3.8	17.2	0.193915	0.283552	0.683877	0.494053	NA	chr4	102739297	102743297	68.644	60
NA	ENSMUSG00000082348	2.49228	0.000233262	0.00413689	54.7	11.7	0.179244	0.285324	0.628212	0.529865	NA	chr4	110511732	110515732	49.5762	42
Pts	ENSMUSG00000032067	-2.06957	0.000233859	0.00414345	16.2	121.9	-0.31929	0.256793	-1.24337	0.213731	0.971931	chr9	50526724	50530724	489.673	587
NA	ENSMUSG00000064400	3.00811	0.000237382	0.0042018	21.7	0.5	-0.301861	0.276206	-1.09288	0.274444	NA	chr19	4076512	4080512	64.8305	97
Ulbp1	ENSMUSG00000079685	2.94409	0.000238294	0.00420741	3.1	0.1	0.583059	0.262665	2.21978	0.0264339	0.592334	chr10	7471638	7475638	236.682	123
Fam120a	ENSMUSG00000038014	0.837442	0.00023839	0.00420741	284.5	158.8	-0.145064	0.23865	-0.607853	0.543285	0.971931	chr13	48966017	48970017	943.353	944
Gm5067	ENSMUSG00000090671	2.41937	0.000238263	0.00420741	167.2	28.1	0.0396526	0.252029	0.157334	0.874982	0.988029	chr5	26005027	26009027	214.792	198
Tchhl1	ENSMUSG00000027908	-2.95078	0.000239989	0.00423142	0.1	20.5	0.170157	0.26652	0.638439	0.523188	0.971931	chr3	93466754	93470754	522.952	374
Agfg2	ENSMUSG00000029722	1.9242	0.000240214	0.00423142	81.4	19.7	0.104413	0.264217	0.395181	0.692709	0.972559	chr5	137682726	137686726	229.841	191
Unc13b	ENSMUSG00000028456	1.16183	0.000240966	0.00424059	42.1	18.8	-0.60149	0.264257	-2.27615	0.0228368	0.548624	chr4	43056953	43060953	101.24	176
NA	ENSMUSG00000087371	2.46299	0.00024147	0.00424536	12.2	2.1	0.261556	0.253812	1.03051	0.302772	0.971931	chr7	27506122	27510122	581.586	392
Aldh18a1	ENSMUSG00000025007	1.82932	0.000241742	0.00424607	27.9	7	0.352589	0.267248	1.31933	0.187059	0.971931	chr19	40586463	40590463	279.093	182
Mbnl2	ENSMUSG00000022139	0.839513	0.000242394	0.00425342	619.3	343.5	0.0140742	0.258418	0.0544629	0.956566	0.995102	chr14	120273669	120277669	1281.95	1094
NA	ENSMUSG00000094786	-1.77114	0.000243023	0.00425628	28.9	137.1	-0.464176	0.261693	-1.77374	0.0761058	0.838295	chr2	177496215	177500215	326.449	460
NA	ENSMUSG00000085071	3.00131	0.00024279	0.00425628	2.1	0	0.308607	0.266475	1.15811	0.246821	0.971931	chr2	139675714	139679714	158.7	108
Atp13a3	ENSMUSG00000022533	1.53353	0.00024426	0.00427385	60.5	21.2	0.148231	0.283887	0.522149	0.601567	NA	chr16	30403975	30407975	69.9152	62
Ankrd55	ENSMUSG00000049985	-1.90313	0.000244898	0.00428091	7.6	41.7	0.383462	0.279119	1.37383	0.169494	NA	chr13	112286451	112290451	81.3559	54
Stxbp1	ENSMUSG00000026797	1.87887	0.000245501	0.00428734	73.7	18.8	-0.193088	0.253289	-0.762324	0.445867	0.971931	chr2	32845245	32849245	286.187	293
Hus1	ENSMUSG00000020413	-2.04819	0.000246245	0.00429623	12.9	83.8	-0.333317	0.263494	-1.26499	0.205875	0.971931	chr11	9009191	9013191	298.237	346
Dpp9	ENSMUSG00000001229	1.75111	0.000247456	0.00431324	146.6	43.6	0.0328301	0.249678	0.13149	0.895388	0.990253	chr17	56216905	56220905	459.564	391
NA	ENSMUSG00000092931	2.75928	0.000248914	0.00432538	99.7	13.8	-0.739301	0.267028	-2.76862	0.00562936	0.291722	chr12	33060441	33064441	331.203	608
Acsl6	ENSMUSG00000020333	-1.50461	0.000248924	0.00432538	9.3	32.2	-0.66108	0.261481	-2.52822	0.0114644	0.407489	chr11	54301798	54305798	176.231	291
Baz1a	ENSMUSG00000035021	1.54969	0.000249074	0.00432538	90.5	30	0.106114	0.279876	0.379148	0.704578	NA	chr12	55012348	55016348	78.8135	74
NA	ENSMUSG00000078677	2.69005	0.000249099	0.00432538	283.8	47.7	0.0400664	0.280084	0.143052	0.886249	NA	chr7	66363905	66367905	73.7287	72
Lrrfip1	ENSMUSG00000026305	1.84328	0.000249632	0.00432796	5259.7	1411.2	-0.194532	0.249383	-0.780052	0.43536	0.971931	chr1	90996737	91000737	1098.33	1177
Gm12295	ENSMUSG00000085162	1.70905	0.000249722	0.00432796	1019.9	301.5	0.0957298	0.266751	0.358874	0.719689	0.974849	chr11	65363798	65367798	1785.09	1668
Sh2d6	ENSMUSG00000052631	2.97104	0.000250342	0.00433413	6.3	0.1	-0.13581	0.260074	-0.522198	0.601533	0.971931	chr6	72519707	72523707	147.755	160
Pzp	ENSMUSG00000030359	-2.11571	0.000250552	0.00433413	4.7	34.9	0.209364	0.281478	0.743805	0.456995	NA	chr6	128524720	128528720	63.5593	49
Cplx3	ENSMUSG00000039714	2.72186	0.000250914	0.00433604	7.7	0.5	0.599557	0.263039	2.27934	0.0226466	0.548584	chr9	57604281	57608281	177.853	94
Garem	ENSMUSG00000042680	1.06127	0.000251137	0.00433604	206.5	97.8	-0.160154	0.247337	-0.647516	0.517298	0.971931	chr18	21298138	21302138	987.152	1003
Asic3	ENSMUSG00000038276	-2.20662	0.000251747	0.00433836	1	12.9	0.116011	0.26547	0.437003	0.662109	0.972431	chr5	24411392	24415392	115.678	106
Iqce	ENSMUSG00000036555	1.87696	0.00025171	0.00433836	24.3	7.1	0.00555737	0.264906	0.0209787	0.983263	0.997523	chr5	140700378	140704378	207.952	193
Nisch	ENSMUSG00000021910	1.55827	0.000252867	0.00435356	1845.2	659.6	-0.238194	0.253025	-0.941387	0.346507	0.971931	chr14	31214946	31218946	194.271	229
Isoc2b	ENSMUSG00000052605	-1.98573	0.000254655	0.00438021	7.8	101.7	-0.118551	0.275833	-0.429791	0.667347	NA	chr7	4868258	4872258	71.1864	87
NA	ENSMUSG00000065922	2.44006	0.0002555	0.00439061	2746.4	758.4	-0.301076	0.283993	-1.06015	0.289075	NA	chr18	73531550	73535550	40.6779	66
Ush1c	ENSMUSG00000030838	2.05826	0.000259327	0.00445218	739	194.4	-0.360377	0.266845	-1.35051	0.176853	0.970451	chr7	46236503	46240503	216.899	260
Ipo4	ENSMUSG00000002319	1.36732	0.000260322	0.00446508	178.8	67.7	0.24051	0.256469	0.937774	0.348361	0.971931	chr14	55633957	55637957	218.896	163
Fpgs	ENSMUSG00000009566	2.09086	0.000260687	0.00446714	151.6	40.8	0.119661	0.272203	0.4396	0.660227	NA	chr2	32702145	32706145	94.0677	87
Mterf2	ENSMUSG00000049038	-1.78905	0.000261354	0.00446891	7.8	35.7	-0.465118	0.276635	-1.68134	0.0926965	0.872089	chr10	85126027	85130027	253.049	344
Tchp	ENSMUSG00000002486	1.78332	0.000261769	0.00446891	93.7	29.1	-0.171684	0.261623	-0.656226	0.511679	0.971931	chr5	114705760	114709760	128.602	145
BC034090	ENSMUSG00000033722	2.01421	0.000261628	0.00446891	1726.9	431.7	-0.263312	0.252007	-1.04486	0.296089	0.971931	chr1	155242444	155246444	1214.43	1637
Plxna1	ENSMUSG00000030084	1.11865	0.000261196	0.00446891	51.4	23.4	-0.0958313	0.244925	-0.391267	0.6956	0.973637	chr6	89360620	89364620	296.73	279
Nbeal2	ENSMUSG00000056724	1.72678	0.000262542	0.00447792	56.3	17.7	-0.242339	0.251791	-0.96246	0.335819	0.971931	chr9	110652161	110656161	385.083	419
Usp47	ENSMUSG00000059263	1.23395	0.000263042	0.00448226	341.4	140.5	0.0845008	0.258854	0.326442	0.74409	0.977116	chr7	112021504	112025504	1202.78	953
Lifr	ENSMUSG00000054263	-1.39166	0.000263483	0.00448559	52.2	150.6	-0.188849	0.270467	-0.698233	0.485032	0.971931	chr15	7088614	7092614	109.448	129
Kdm4b	ENSMUSG00000024201	1.29679	0.000264755	0.00450305	162.8	66	0.057297	0.25599	0.223825	0.822894	0.982277	chr17	56324062	56328062	511.859	425
Chst3	ENSMUSG00000057337	1.71359	0.000266407	0.00452693	24.8	7.8	0.342006	0.264943	1.29087	0.196749	0.971931	chr10	60217260	60221260	168.277	113
NA	ENSMUSG00000064921	-2.98515	0.000266709	0.00452785	1.7	68.9	-0.0886652	0.279935	-0.316735	0.751445	0.977354	chr9	70535814	70539814	94.0677	113
1700021K19Rik	ENSMUSG00000035629	1.6876	0.000269434	0.00456986	789.9	260.5	-0.0388069	0.245376	-0.158152	0.874337	0.987953	chr16	32875766	32879766	946.722	878
Arsa	ENSMUSG00000022620	2.23867	0.000269747	0.00457094	23.9	3.8	-0.275095	0.26001	-1.05802	0.290047	0.971931	chr15	89475425	89479425	253.049	277
Ip6k2	ENSMUSG00000032599	1.44979	0.000270486	0.00457497	89	30.3	-0.116206	0.255389	-0.455018	0.649097	0.971931	chr9	108781796	108785796	367.524	346
Arrb2	ENSMUSG00000060216	2.35097	0.000270379	0.00457497	20.7	3.9	-0.221135	0.256843	-0.860974	0.389253	0.971931	chr11	70430635	70434635	183.326	214
AB124611	ENSMUSG00000057191	-2.29934	0.000271023	0.00457982	2.3	35.6	0.294439	0.269377	1.09304	0.274377	0.971931	chr9	21524176	21528176	120.763	93
LOC102636650	ENSMUSG00000087484	-2.11055	0.00027194	0.00458683	38	336.9	-0.179297	0.240959	-0.744095	0.456819	0.971931	chr5	144254186	144258186	1210.13	1482
NA	ENSMUSG00000088695	-2.54085	0.000271732	0.00458683	4.2	111.1	0.136602	0.273539	0.499386	0.617507	NA	chr2	155651024	155655024	86.4406	78
Diap3	ENSMUSG00000022021	2.67019	0.000273206	0.00460392	3.6	0.5	-0.144213	0.275444	-0.523567	0.60058	NA	chr14	87139235	87143235	74.9999	91
2900026A02Rik	ENSMUSG00000051339	1.61092	0.000273975	0.00461017	32.6	10.3	-0.64644	0.269765	-2.39631	0.0165612	0.47406	chr5	113219236	113223236	84.8224	159
Dock1	ENSMUSG00000058325	1.22423	0.000274082	0.00461017	121.1	50.5	-0.00680166	0.253117	-0.0268716	0.978562	0.997427	chr7	134668654	134672654	206.584	196
NA	ENSMUSG00000070342	-2.55832	0.000274839	0.00461866	2.6	127	0.52884	0.274259	1.92825	0.0538239	NA	chr3	149223745	149227745	108.051	63
NA	ENSMUSG00000081873	-2.16942	0.000277897	0.00466575	7.5	90	0.010311	0.277317	0.0371811	0.970341	NA	chr10	42329263	42333263	77.5423	80
Adamtsl3	ENSMUSG00000070469	1.93881	0.000279125	0.00468207	6.5	1.6	0.294326	0.262252	1.1223	0.261733	0.971931	chr7	82333694	82337694	191.534	139
NA	ENSMUSG00000083771	-2.54421	0.00028096	0.00470421	1	36	-0.290247	0.260692	-1.11337	0.26555	0.971931	chr5	111006846	111010846	432.624	505
Bmp2k	ENSMUSG00000034663	1.38773	0.000280767	0.00470421	63.7	24.3	0.06243	0.249285	0.250437	0.80225	0.980421	chr5	96995689	96999689	576.831	476
Wnt2b	ENSMUSG00000027840	-1.75196	0.000281664	0.00471168	56	267.2	0.218993	0.269826	0.811609	0.417016	0.971931	chr3	104959921	104963921	109.322	90
NA	ENSMUSG00000081429	-2.57296	0.00028238	0.00471934	2.2	61.2	-0.316291	0.274181	-1.15358	0.248671	0.971931	chr1	63071774	63075774	78.8135	112
Col7a1	ENSMUSG00000025650	2.4177	0.000282795	0.00471993	10.1	2.5	-0.153661	0.267365	-0.574722	0.56548	0.971931	chr9	108951586	108955586	125.865	142
NA	ENSMUSG00000101904	-2.56629	0.000283191	0.00471993	1.4	74.7	-0.0558069	0.250985	-0.222351	0.82404	0.982443	chr1	130713799	130717799	1251.63	1173
Zfp651	ENSMUSG00000013419	1.80139	0.000283169	0.00471993	158.6	46.2	-0.0370978	0.257098	-0.144295	0.885268	0.990253	chr9	121757330	121761330	724.36	606
Blm	ENSMUSG00000030528	1.77978	0.000284353	0.00472981	10.5	2.9	-0.259262	0.277272	-0.935043	0.349766	0.971931	chr7	80533119	80537119	260.58	281
4933411K16Rik	ENSMUSG00000090369	2.37216	0.00028456	0.00472981	63.3	2.2	-0.0147474	0.278642	-0.0529259	0.957791	NA	chr19	42050248	42054248	64.8305	66
NA	ENSMUSG00000101477	-2.46137	0.000284482	0.00472981	4.9	125.8	0.0134901	0.273139	0.0493891	0.960609	NA	chr1	107950837	107954837	88.983	91
Slc12a7	ENSMUSG00000017756	1.71048	0.000285115	0.00473422	1052	336.9	-0.37832	0.248272	-1.52381	0.127556	0.930223	chr13	73731094	73735094	980.723	1448
Flii	ENSMUSG00000002812	1.411	0.000285344	0.00473422	623.6	238	-0.161641	0.250841	-0.644396	0.519318	0.971931	chr11	60725263	60729263	1071.05	1295
Zc3h4	ENSMUSG00000059273	1.98577	0.000285808	0.00473762	357.3	100.4	0.0757135	0.251109	0.301517	0.763021	0.977786	chr7	16398910	16402910	1717.7	1681
Ctla4	ENSMUSG00000026011	-2.27989	0.000286661	0.00474745	8.5	103.5	0.0830462	0.278954	0.297706	0.765928	NA	chr1	60885000	60889000	66.1016	64
NA	ENSMUSG00000101481	-2.98228	0.000288209	0.00476876	0.1	16.8	-0.349044	0.28531	-1.22339	0.221184	NA	chr16	5973585	5977585	36.8644	66
NA	ENSMUSG00000032387	1.63479	0.000288919	0.00477397	405	128.6	-0.125897	0.251274	-0.501034	0.616347	0.971931	chr9	65627648	65631648	817.011	814
Megf8	ENSMUSG00000045039	1.95308	0.000289047	0.00477397	105.6	31.3	-0.160363	0.260009	-0.616758	0.537395	0.971931	chr7	25315164	25319164	308.78	302
Fbxw17	ENSMUSG00000037816	1.92851	0.000290672	0.00479648	49.6	13.8	0.204737	0.264989	0.772625	0.439744	0.971931	chr13	50415864	50419864	161.436	127
Rbm25	ENSMUSG00000010608	2.29679	0.000291429	0.00480463	10306.5	2670.4	-0.104145	0.260474	-0.399829	0.689283	0.972431	chr12	83629236	83633236	443.717	425
Ampd3	ENSMUSG00000005686	1.34111	0.000292478	0.00481758	281.4	107.8	-0.016358	0.25227	-0.0648434	0.948299	0.994275	chr7	110766206	110770206	965.252	862
Shmt1	ENSMUSG00000020534	-1.75064	0.00029339	0.00482824	9.3	44.4	-0.509245	0.261384	-1.94827	0.0513831	0.749551	chr11	60809718	60813718	106.712	170
Fzd1	ENSMUSG00000044674	2.15583	0.000294174	0.00483244	21.4	4.4	0.452727	0.251728	1.79848	0.0721011	0.826516	chr5	4756035	4760035	689.345	390
Ccdc80	ENSMUSG00000022665	1.95356	0.00029396	0.00483244	77.4	21.7	0.14183	0.270766	0.523809	0.600412	0.971931	chr16	45091402	45095402	317.818	229
Zfp799	ENSMUSG00000095253	-1.75832	0.000295186	0.0048447	19.2	78.8	-0.584144	0.263788	-2.21445	0.026798	0.595171	chr17	32828261	32832261	216.899	328
NA	ENSMUSG00000098788	-2.6647	0.00029596	0.00485305	5.3	184.2	-0.495651	0.276955	-1.78965	0.0735109	0.830482	chr13	32756202	32760202	239.493	337
Cflar	ENSMUSG00000026031	-1.25777	0.000297407	0.00486676	116.6	297.8	-0.209987	0.260121	-0.807267	0.419513	0.971931	chr1	58709508	58713508	1091.13	1371
Vldlr	ENSMUSG00000024924	-1.10324	0.000297595	0.00486676	327.7	754.8	-0.0795163	0.248176	-0.320403	0.748663	0.977354	chr19	27214484	27218484	1071.38	1009
Larp4b	ENSMUSG00000033499	-1.11023	0.000297323	0.00486676	175.6	400	0.0192759	0.270946	0.0711429	0.943284	0.994121	chr13	9091881	9095881	344.93	278
Trim16	ENSMUSG00000047821	1.8844	0.000300515	0.00491012	57.3	16.7	-0.10485	0.254507	-0.411973	0.680359	0.972431	chr11	62818231	62822231	798.481	723
Plk1	ENSMUSG00000030867	2.71176	0.000303202	0.00494516	7	0.1	-0.350052	0.268045	-1.30594	0.191572	0.971931	chr7	122157439	122161439	114.921	155
NA	ENSMUSG00000064655	2.46767	0.000303009	0.00494516	179.6	28.9	-0.113178	0.268451	-0.421598	0.673319	0.972431	chr4	123289344	123293344	158.7	167
Pdzrn3	ENSMUSG00000035357	1.88549	0.000303782	0.00495021	400.7	115.4	-0.149512	0.243718	-0.613466	0.539568	0.971931	chr6	101375897	101379897	773.213	790
Sf3a3	ENSMUSG00000028902	1.45657	0.000305883	0.0049787	169	61.8	-0.150995	0.258009	-0.585231	0.558393	0.971931	chr4	124712776	124716776	251.543	246
NA	ENSMUSG00000098404	1.74756	0.000306076	0.0049787	825.1	241.7	0.245766	0.284651	0.863394	0.387921	NA	chr7	15287190	15291190	58.4745	46
Ap2a1	ENSMUSG00000060279	1.51632	0.000307029	0.00498326	156.4	56.6	-0.28222	0.252954	-1.1157	0.264552	0.971931	chr7	44927496	44931496	513.443	581
Rab11fip3	ENSMUSG00000037098	1.72144	0.000307174	0.00498326	420	128.1	-0.0299646	0.251075	-0.119345	0.905002	0.990886	chr17	26067555	26071555	557.815	506
NA	ENSMUSG00000085033	-2.29228	0.000306661	0.00498326	5.3	84.2	-0.165996	0.277941	-0.597233	0.550352	NA	chr11	106049852	106053852	67.3728	86
Cthrc1	ENSMUSG00000054196	2.81412	0.000308162	0.00499485	5.3	0.2	0.117294	0.260066	0.451015	0.651979	0.971931	chr15	39074932	39078932	175.117	147
Gadd45a	ENSMUSG00000036390	-2.2476	0.000308522	0.00499625	3.6	34.9	-0.638708	0.258252	-2.47319	0.0133911	0.440747	chr6	67035457	67039457	498.629	752
Spon1	ENSMUSG00000038156	1.03501	0.000309957	0.00501504	63.3	30.8	-0.00926283	0.263388	-0.035168	0.971946	0.996587	chr7	113763998	113767998	231.209	215
Zfp827	ENSMUSG00000071064	1.84645	0.000310986	0.00502724	626.3	188.1	-0.20998	0.254518	-0.825011	0.409366	0.971931	chr8	79026437	79030437	1024.21	1089
NA	ENSMUSG00000100457	-2.06019	0.000311684	0.00503408	45.6	314.8	-0.10821	0.267562	-0.40443	0.685896	0.972431	chr1	107915259	107919259	1161.38	1315
NA	ENSMUSG00000086249	-2.44963	0.000313021	0.0050512	8.1	234	-0.0373584	0.279165	-0.133822	0.893543	NA	chr4	106239216	106243216	69.9152	78
NA	ENSMUSG00000054061	-2.2572	0.000315428	0.00508555	2.2	39.7	0.215067	0.250538	0.858424	0.390658	0.971931	chr7	93079027	93083027	467.487	338
Htra3	ENSMUSG00000029096	-1.64498	0.000317184	0.00510935	12.4	41.8	0.00105065	0.261414	0.00401909	0.996793	0.999571	chr5	35677782	35681782	192.903	185
NA	ENSMUSG00000087623	2.40078	0.000317531	0.00511044	15	1.5	-0.417626	0.281311	-1.48457	0.137657	NA	chr4	41518694	41522694	47.0339	83
Rab11fip5	ENSMUSG00000051343	1.74477	0.000319937	0.00514462	230.2	72.2	-0.102807	0.253042	-0.406283	0.684535	0.972431	chr6	85372634	85376634	1162.82	1330
Pah	ENSMUSG00000020051	-2.22746	0.000322953	0.005184	3	24.2	-0.880428	0.270595	-3.25368	0.0011392	0.13147	chr10	87519795	87523795	53.3898	140
Fam110b	ENSMUSG00000049119	-1.89013	0.000322755	0.005184	20.1	101.7	0.079217	0.269415	0.294034	0.768732	0.978322	chr4	5642090	5646090	175.117	150
Col4a4	ENSMUSG00000067158	1.80567	0.000325525	0.0052207	18.8	5.9	-0.309155	0.259624	-1.19078	0.23374	0.971931	chr1	82584849	82588849	150.491	192
Glt28d2	ENSMUSG00000031286	-2.08541	0.000329214	0.00527522	43.1	367.2	-0.162638	0.259131	-0.627631	0.530246	0.971931	chr3	85885516	85889516	833.857	845
Pml	ENSMUSG00000036986	1.47681	0.000330705	0.00528982	62.6	22.3	-0.198928	0.266598	-0.746173	0.455563	0.971931	chr9	58247786	58251786	381.913	401
Ext1	ENSMUSG00000061731	1.09202	0.000330556	0.00528982	229.8	105.7	0.125235	0.265125	0.472363	0.636667	0.971931	chr15	53344159	53348159	500.766	378
C030017K20Rik	ENSMUSG00000078490	-2.37773	0.000332648	0.00531359	1.3	14.9	0.0718761	0.273489	0.262811	0.792696	NA	chr4	155407190	155411190	91.5253	88
NA	ENSMUSG00000089235	1.73846	0.000334384	0.00533467	7633.7	2343.6	-0.220133	0.250438	-0.878992	0.379405	0.971931	chr18	74776700	74780700	1169.08	1253
Hist2h2be	ENSMUSG00000068854	-2.65898	0.000335158	0.00534066	0.3	14.1	-0.314942	0.249389	-1.26285	0.206642	0.971931	chr3	96219119	96223119	860.81	1000
Arpc5	ENSMUSG00000008475	2.00257	0.000335344	0.00534066	148	43.5	0.0606545	0.246035	0.246528	0.805274	0.980714	chr1	152764542	152768542	419.946	352
Ephx1	ENSMUSG00000038776	1.86088	0.000336388	0.00535261	66	18.8	0.290558	0.269216	1.07927	0.280466	0.971931	chr1	181018904	181022904	111.864	86
NA	ENSMUSG00000088581	2.28117	0.000336815	0.00535474	561.7	112	0.272027	0.277333	0.980869	0.326657	NA	chr17	69592777	69596777	80.0847	62
Fam134b	ENSMUSG00000022270	-1.34001	0.000337439	0.00536001	163.4	437.5	-0.0391962	0.254447	-0.154045	0.877575	0.98873	chr15	25841180	25845180	352.461	310
Dtwd1	ENSMUSG00000023330	-2.50567	0.000338201	0.00536278	0.8	13.3	-0.44218	0.274598	-1.61028	0.107337	0.902689	chr2	126150141	126154141	292.212	384
Lta	ENSMUSG00000024402	2.80726	0.000337931	0.00536278	9.6	0.8	-0.0915987	0.281274	-0.325656	0.744685	NA	chr17	35203351	35207351	76.2711	89
Ndufb2	ENSMUSG00000002416	-1.67372	0.000340336	0.00538727	18.7	78.9	-0.31298	0.259797	-1.20471	0.228314	0.971931	chr6	39590574	39594574	614.864	686
Abcb1a	ENSMUSG00000040584	2.21533	0.000340203	0.00538727	9	1.8	-0.108137	0.277746	-0.389337	0.697027	NA	chr5	8658077	8662077	73.7287	86
Rhobtb3	ENSMUSG00000021589	-1.32581	0.000341108	0.00539016	27.3	70.4	-0.215638	0.269785	-0.799293	0.42412	0.971931	chr13	75941925	75945925	589.509	624
Tyk2	ENSMUSG00000032175	1.75609	0.000340999	0.00539016	95.4	26.8	0.000737242	0.26184	0.00281562	0.997753	0.999571	chr9	21129243	21133243	239.418	222
Unc13c	ENSMUSG00000062151	1.69085	0.000343807	0.0054269	34.9	10	0.458402	0.265584	1.72601	0.0843448	0.865149	chr9	73966966	73970966	164.172	98
Trrap	ENSMUSG00000045482	1.7864	0.000344197	0.0054269	794.4	253.9	0.134436	0.259915	0.517231	0.604995	0.971931	chr5	144765732	144769732	434.208	333
Stxbp2	ENSMUSG00000004626	1.81515	0.000344325	0.0054269	43.8	12.6	0.00275685	0.269179	0.0102417	0.991828	0.999347	chr8	3628955	3632955	105.508	107
Ksr1	ENSMUSG00000018334	2.27292	0.000345534	0.00544127	37.7	6.3	-0.158305	0.263827	-0.600033	0.548484	0.971931	chr11	79144407	79148407	199.743	216
Pou6f1	ENSMUSG00000009739	1.7142	0.000346963	0.00545906	69	22.7	-0.156551	0.269275	-0.581378	0.560986	0.971931	chr15	100597984	100601984	320.83	312
Drap1	ENSMUSG00000024914	2.04388	0.000347926	0.0054695	198	55.1	0.081058	0.243081	0.333461	0.738786	0.974955	chr19	5422979	5426979	734.468	564
Tmtc4	ENSMUSG00000041594	-1.29141	0.000350214	0.00549601	12.2	33	-0.430069	0.26738	-1.60846	0.107735	0.902689	chr14	122982035	122986035	224.431	293
Zfp354a	ENSMUSG00000020364	-1.68871	0.00035015	0.00549601	5	21.8	-0.0727845	0.259882	-0.280067	0.779426	0.98003	chr11	51057257	51061257	140.915	145
Adap1	ENSMUSG00000056413	2.87877	0.000351692	0.00551447	3.9	0.1	0.160517	0.260811	0.615451	0.538257	0.971931	chr5	139323622	139327622	213.424	171
Lims2	ENSMUSG00000024395	1.1484	0.000355688	0.00557234	560.1	246	-0.576179	0.258878	-2.22568	0.0260358	0.588274	chr18	31920290	31924290	138.178	227
Yipf7	ENSMUSG00000029158	-1.83098	0.000357839	0.00559166	44.3	190.7	-0.133108	0.274408	-0.485075	0.627623	0.971931	chr5	69540648	69544648	1069.69	1035
Abcb4	ENSMUSG00000042476	1.384	0.000357365	0.00559166	77.2	29.6	-0.280314	0.254967	-1.09941	0.271589	0.971931	chr5	8891717	8895717	722.676	761
Arhgap18	ENSMUSG00000039031	1.30498	0.000357801	0.00559166	67.1	26.1	0.0908926	0.278396	0.326487	0.744056	NA	chr10	26751421	26755421	69.9152	67
Nfkbiz	ENSMUSG00000035356	1.86611	0.000358787	0.00560168	74.6	21	0.144319	0.266605	0.541321	0.588286	0.971931	chr16	55836899	55840899	648.143	474
Ogn	ENSMUSG00000021390	-1.96281	0.000361489	0.00563466	13.7	97.9	-0.285474	0.267684	-1.06646	0.286217	0.971931	chr13	49606046	49610046	764.79	869
Rab30	ENSMUSG00000030643	-2.05704	0.000361516	0.00563466	6.6	43.4	-0.0533113	0.253322	-0.210449	0.833317	0.983242	chr7	92739603	92743603	882.709	805
NA	ENSMUSG00000080966	1.66166	0.000361975	0.005637	92.9	30	-0.205165	0.277772	-0.73861	0.460144	0.971931	chr13	74018134	74022134	86.4406	118
A330023F24Rik	ENSMUSG00000096929	-1.70808	0.000364509	0.00567162	112.8	490.7	-0.311763	0.241827	-1.2892	0.197328	0.971931	chr1	194974375	194978375	731.099	859
Eno3	ENSMUSG00000060600	-1.1504	0.000366273	0.00569422	538.6	1284.1	-0.252338	0.24113	-1.04648	0.295338	0.971931	chr11	70655202	70659202	1202.96	1584
NA	ENSMUSG00000100830	-2.5284	0.000367185	0.00570354	0.5	16.7	0.473862	0.268167	1.76704	0.0772207	0.842208	chr1	133833189	133837189	139.83	87
Pkm	ENSMUSG00000032294	1.58428	0.000368311	0.00571618	1377.3	499.7	-0.0900985	0.253323	-0.355667	0.72209	0.974849	chr9	59654368	59658368	909.662	856
Lmcd1	ENSMUSG00000057604	1.77709	0.000370889	0.00574642	191.8	51.8	-0.206795	0.258997	-0.798445	0.424612	0.971931	chr6	112271758	112275758	980.413	1036
NA	ENSMUSG00000084948	2.81908	0.000370625	0.00574642	5.7	0.2	0.091369	0.278429	0.328158	0.742792	NA	chr18	69967609	69971609	66.1016	62
NA	ENSMUSG00000099576	-2.03418	0.00037141	0.00574962	16.6	126.9	-0.0666191	0.270656	-0.246139	0.805574	0.98087	chr1	43300925	43304925	99.1525	109
Kars	ENSMUSG00000031948	1.09206	0.00037251	0.00576176	75.2	34.3	-0.0857108	0.26645	-0.321677	0.747698	0.977354	chr8	112009323	112013323	343.424	315
Myrf	ENSMUSG00000036098	1.91779	0.000377861	0.00583959	90.6	25	0.204181	0.265589	0.768786	0.44202	0.971931	chr19	10238748	10242748	180.59	137
Boc	ENSMUSG00000022687	2.40983	0.000379091	0.00585363	8.5	1	-0.127254	0.25694	-0.495268	0.620411	0.971931	chr16	44556897	44560897	181.958	192
Cyp3a13	ENSMUSG00000029727	-2.25306	0.000379963	0.00586215	2.4	30.6	0.0558946	0.285106	0.196048	0.844572	NA	chr5	137919619	137923619	57.2033	58
Slc9a7	ENSMUSG00000037341	2.00702	0.000382782	0.00589923	12.3	2.2	0.549851	0.267248	2.05746	0.0396419	0.704883	chrX	20289807	20293807	164.172	89
Srek1	ENSMUSG00000032621	2.28023	0.000383012	0.00589923	2690.4	763.5	-0.260806	0.257554	-1.01263	0.311239	0.971931	chr13	103772608	103776608	560.984	633
Mid1	ENSMUSG00000035299	1.89459	0.000386003	0.00594029	1484.9	361.1	-0.309235	0.278759	-1.10933	0.267289	0.971931	chrX	169683199	169687199	362.897	433
Otud1	ENSMUSG00000043415	2.04127	0.000388425	0.0059675	166.8	46.8	-0.0271911	0.25139	-0.108163	0.913866	0.990886	chr2	19655752	19659752	1019.16	902
Ube2u	ENSMUSG00000069733	2.66081	0.000388339	0.0059675	12.9	1.8	0.21772	0.28517	0.763476	0.445179	NA	chr4	100476849	100480849	52.1186	40
Mum1l1	ENSMUSG00000042515	1.5997	0.00039004	0.00598727	32.7	9.8	0.130639	0.282067	0.463151	0.643256	NA	chrX	139208042	139212042	80.0847	69
Fam173b	ENSMUSG00000039065	-1.94729	0.000390662	0.00599179	16	105	-0.0973829	0.262501	-0.370981	0.710651	0.974839	chr15	31599852	31603852	560.984	529
NA	ENSMUSG00000102018	2.42189	0.000391741	0.0060033	29.5	4.1	0.0222165	0.26279	0.0845409	0.932626	0.993455	chr15	76007888	76011888	143.651	135
Fkbp5	ENSMUSG00000024222	2.53616	0.000395131	0.00605018	45.8	7.9	-0.0603787	0.242745	-0.248733	0.803567	0.980513	chr17	28515527	28519527	779.951	742
Stk11ip	ENSMUSG00000026213	1.12021	0.000404549	0.00618919	50.2	22.9	-0.179776	0.244865	-0.734185	0.462836	0.971931	chr1	75519529	75523529	405.684	425
Ech1	ENSMUSG00000053898	-1.80652	0.000405227	0.00619438	75.1	380.1	-0.444141	0.247321	-1.79581	0.0725249	0.828314	chr7	28823217	28827217	1000.63	1341
Sh3pxd2b	ENSMUSG00000040711	2.27829	0.000407572	0.00622501	16	3.6	0.25946	0.261146	0.993543	0.320446	0.971931	chr11	32345820	32349820	212.056	154
Mlip	ENSMUSG00000032355	-1.04296	0.000412892	0.00625917	1461.1	3135.5	-0.575001	0.264845	-2.17108	0.0299248	0.626289	chr9	77350969	77354969	350.219	538
Limk2	ENSMUSG00000020451	1.26136	0.000411685	0.00625917	232.2	98.3	-0.526865	0.266338	-1.97818	0.0479079	0.732947	chr11	3407189	3411189	215.393	305
Tpd52	ENSMUSG00000027506	1.43173	0.000411098	0.00625917	28.1	10.1	0.223808	0.246614	0.907525	0.364129	0.971931	chr3	9002723	9006723	476.995	341
NA	ENSMUSG00000082287	-2.43153	0.000412734	0.00625917	5.6	153.1	-0.264459	0.262818	-1.00624	0.314298	0.971931	chr18	39339964	39343964	247.024	267
Pcbp1	ENSMUSG00000051695	1.3677	0.000412346	0.00625917	114.6	42.3	-0.068433	0.257458	-0.265803	0.790391	0.980127	chr6	86524321	86528321	1120.23	1034
Lrrk1	ENSMUSG00000015133	1.64363	0.000412023	0.00625917	50.7	17.4	0.0411364	0.258452	0.159165	0.873539	0.987942	chr7	66386350	66390350	432.624	363
NA	ENSMUSG00000086407	-2.19406	0.000411239	0.00625917	0.5	10.9	-0.0384286	0.268287	-0.143237	0.886103	0.990253	chr2	150604233	150608233	202.479	193
Dqx1	ENSMUSG00000009145	-1.96988	0.000410624	0.00625917	2.3	11.9	-0.00352874	0.27334	-0.0129097	0.9897	0.999297	chr6	83055844	83059844	94.0677	101
Xkr6	ENSMUSG00000035067	-2.0821	0.000411357	0.00625917	1.2	9.9	-0.122135	0.285097	-0.428396	0.668363	NA	chr14	63604503	63608503	57.2033	65
Cd300lg	ENSMUSG00000017309	-2.27777	0.000413597	0.00626279	0.6	9.7	-0.491283	0.257893	-1.90499	0.0567814	0.775545	chr11	102039509	102043509	175.117	262
Pde8a	ENSMUSG00000025584	1.42856	0.000413817	0.00626279	46.7	17.8	-0.357653	0.25519	-1.40152	0.161059	0.95765	chr7	81211596	81215596	522.952	640
Tgfbr3l	ENSMUSG00000089736	-2.55068	0.000415746	0.00627121	0.3	7.4	-0.537561	0.26312	-2.04303	0.0410496	0.707957	chr8	4246214	4250214	153.228	243
Nucb2	ENSMUSG00000030659	1.85419	0.000415727	0.00627121	30.7	6.3	0.278719	0.258339	1.07889	0.280637	0.971931	chr7	116502369	116506369	214.792	153
C1qtnf6	ENSMUSG00000022440	2.15493	0.000415673	0.00627121	33.3	5.4	-0.106912	0.255499	-0.418445	0.675622	0.972431	chr15	78529416	78533416	1638.84	1863
Git1	ENSMUSG00000011877	1.58722	0.000415133	0.00627121	267.3	92.4	-0.032264	0.251283	-0.128397	0.897835	0.990253	chr11	77491562	77495562	805.219	674
Gnb4	ENSMUSG00000027669	-1.34126	0.000416147	0.00627207	50.9	134.6	0.182917	0.261902	0.698417	0.484917	0.971931	chr3	32614585	32618585	162.804	129
Ptges3l	ENSMUSG00000097487	-1.50492	0.000416898	0.00627822	61.7	215.5	-0.16647	0.257815	-0.645693	0.518478	0.971931	chr11	101423333	101427333	660.347	633
NA	ENSMUSG00000086753	-2.15014	0.000417886	0.00627908	3	52	0.386225	0.270113	1.42987	0.152755	0.945511	chr5	123506395	123510395	123.305	87
Zfp641	ENSMUSG00000022987	1.12838	0.00041833	0.00627908	159.4	67.5	0.3192	0.25797	1.23735	0.215956	0.971931	chr15	98294161	98298161	197.007	138
D330041H03Rik	ENSMUSG00000073437	-1.70828	0.000418268	0.00627908	30.4	112.8	-0.211829	0.269143	-0.787053	0.431251	0.971931	chr17	24412542	24416542	337.399	347
Tmem200c	ENSMUSG00000095407	2.68964	0.000418309	0.00627908	4.3	0.1	-0.268508	0.285001	-0.942131	0.346126	NA	chr17	68824623	68828623	47.0339	73
Bcl9l	ENSMUSG00000063382	1.9599	0.000420463	0.0063059	512.2	153.7	-0.122272	0.241856	-0.505556	0.613169	0.971931	chr9	44480825	44484825	906.293	890
Arhgef40	ENSMUSG00000004562	1.76092	0.000423207	0.00634186	179.8	57.9	0.272731	0.250248	1.08984	0.275783	0.971931	chr14	51982719	51986719	469.072	318
Lpin2	ENSMUSG00000024052	1.44578	0.000424929	0.00636244	26.2	9.2	0.00229106	0.258176	0.00887404	0.99292	0.999347	chr17	71180560	71184560	216.16	201
Tyw3	ENSMUSG00000047583	-1.76977	0.000425845	0.00637094	4.6	19.8	-0.00571395	0.264921	-0.0215685	0.982792	0.997476	chr3	154595104	154599104	535.629	462
Gm16023	ENSMUSG00000086682	-1.90968	0.000426289	0.00637236	35.1	224.6	-0.248885	0.269191	-0.924565	0.355192	0.971931	chr4	155622755	155626755	173.749	205
Zfp598	ENSMUSG00000041130	1.89523	0.000429505	0.00641518	432.9	134	-0.32469	0.273929	-1.1853	0.235897	0.971931	chr17	24667687	24671687	236.481	276
Med19	ENSMUSG00000027080	-1.45824	0.000433787	0.00647385	11.7	38.3	0.0427654	0.261084	0.163799	0.869889	0.986783	chr2	84676402	84680402	480.165	400
Vasp	ENSMUSG00000030403	1.3633	0.000434753	0.00648297	138.8	51.1	0.237953	0.237827	1.00053	0.317054	0.971931	chr7	19269817	19273817	1160.66	826
C920021L13Rik	ENSMUSG00000080727	-1.31922	0.000435192	0.00648422	44.1	123.5	-0.278894	0.263314	-1.05917	0.289523	0.971931	chr3	95869522	95873522	440.547	504
Zfp704	ENSMUSG00000040209	1.8803	0.000436029	0.00649139	33.2	10.4	-0.0330974	0.256053	-0.12926	0.897152	0.990253	chr3	9608085	9612085	229.841	223
Irgm2	ENSMUSG00000069874	-2.07734	0.000439915	0.00654391	1.1	14.2	-0.671782	0.249474	-2.6928	0.00708555	0.327451	chr11	58197618	58201618	340.711	570
Npc1	ENSMUSG00000024413	-1.3227	0.000442235	0.00657308	80.8	228.9	-0.457476	0.249849	-1.83101	0.0670988	0.80897	chr18	12234400	12238400	619.918	842
Ankrd45	ENSMUSG00000044835	2.4005	0.000444788	0.00660144	12.6	3.1	0.372898	0.267502	1.394	0.163317	0.95809	chr1	161140691	161144691	227.105	143
Dync1h1	ENSMUSG00000018707	1.42678	0.000444866	0.00660144	695.3	274	0.165574	0.256658	0.645115	0.518852	0.971931	chr12	110599452	110603452	592.679	436
Nav3	ENSMUSG00000020181	2.0674	0.00044911	0.0066536	14.6	4.2	0.367855	0.27732	1.32647	0.184685	NA	chr10	110454204	110458204	91.5253	63
E230008N13Rik	ENSMUSG00000035539	2.58322	0.000449491	0.00665385	3.2	0.3	0.456922	0.283618	1.61105	0.107169	NA	chr4	45888303	45892303	69.9152	43
AI846148	ENSMUSG00000024970	1.90057	0.000449858	0.0066539	72.1	22.4	-0.111721	0.255476	-0.437304	0.661891	0.972431	chr19	7380994	7384994	448.471	430
NA	ENSMUSG00000086585	-2.8055	0.000451555	0.00666819	0.3	13.8	-0.231812	0.266914	-0.868489	0.385127	0.971931	chr9	95646471	95650471	92.7965	122
Grhl2	ENSMUSG00000022286	-2.17481	0.000452156	0.0066707	0.9	13.6	-0.536643	0.262111	-2.04739	0.0406202	0.707535	chr15	37231036	37235036	119.025	195
Dgat2	ENSMUSG00000030747	-1.82633	0.000452455	0.0066707	18	109.4	-0.470327	0.248149	-1.89534	0.0580471	0.779942	chr7	99180719	99184719	616.549	790
Dhx38	ENSMUSG00000037993	1.80209	0.00045348	0.00667504	133.5	44.1	-0.133393	0.264102	-0.505082	0.613501	0.971931	chr8	109563861	109567861	328.362	313
Zkscan8	ENSMUSG00000063894	-1.40842	0.000453404	0.00667504	11.9	37.4	-0.149115	0.270467	-0.551324	0.581411	0.971931	chr13	21529120	21533120	194.271	208
LOC102640619	ENSMUSG00000079011	-1.63583	0.000454768	0.00668861	10.1	43.6	0.326395	0.282225	1.15651	0.247473	NA	chr8	74831947	74835947	74.9999	55
Shisa4	ENSMUSG00000041889	2.44331	0.000466324	0.00683655	44.3	1.7	0.499345	0.259396	1.92503	0.0542254	0.756371	chr1	135373237	135377237	233.946	135
Fhl2	ENSMUSG00000008136	-1.23651	0.000465771	0.00683655	1087	2683.5	0.14689	0.262654	0.559253	0.575989	0.971931	chr1	43194984	43198984	1406.61	1066
Pitpnm1	ENSMUSG00000024851	1.65208	0.000466043	0.00683655	114.3	35.7	-0.0788585	0.24398	-0.323217	0.746531	0.977354	chr19	4097998	4101998	451.64	427
Hemk1	ENSMUSG00000032579	-1.38435	0.000468403	0.00686151	25.8	71.3	-0.0762336	0.254024	-0.300104	0.764098	0.978207	chr9	107336350	107340350	483.334	472
NA	ENSMUSG00000065360	-2.67865	0.000468848	0.00686254	2.6	81	-0.0366602	0.275986	-0.132833	0.894325	0.990253	chr7	97519808	97523808	301.249	256
Kcnma1	ENSMUSG00000063142	2.54269	0.000470449	0.00688045	2.7	0.1	0.130378	0.277356	0.470075	0.638302	NA	chr14	24012491	24016491	77.5423	72
Pld2	ENSMUSG00000020828	1.29267	0.000471565	0.00689126	48.4	19.2	-0.0755217	0.262105	-0.288135	0.773243	0.978994	chr11	70538064	70542064	262.087	239
Lcn2	ENSMUSG00000026822	2.84178	0.000474253	0.00692501	6.2	0.1	0.0193189	0.267365	0.0722568	0.942398	0.994121	chr2	32386252	32390252	199.743	182
Fchsd1	ENSMUSG00000038524	2.53076	0.000474845	0.00692811	24.5	1.5	-0.281654	0.258444	-1.08981	0.275799	0.971931	chr18	37967774	37971774	145.019	180
Mybbp1a	ENSMUSG00000040463	1.44043	0.000476092	0.00694076	304.6	115.1	-0.143223	0.268224	-0.53397	0.593363	0.971931	chr11	72439355	72443355	220.265	233
Zfp423	ENSMUSG00000045333	2.25625	0.000477411	0.00695444	39.1	6.3	0.0100066	0.258099	0.0387705	0.969073	0.996544	chr8	87957595	87961595	213.424	199
Sntb2	ENSMUSG00000041308	1.92558	0.000479407	0.00697795	15.5	4.6	-0.00246939	0.261157	-0.00945558	0.992456	0.999347	chr8	106933750	106937750	340.412	291
Rassf4	ENSMUSG00000042129	2.11477	0.000480082	0.00698222	10.8	2.8	-0.132622	0.261679	-0.506812	0.612287	0.971931	chr6	116671952	116675952	176.485	190
Pip5k1c	ENSMUSG00000034902	1.56425	0.00048129	0.00698865	68.5	23.3	-0.25602	0.253462	-1.01009	0.312451	0.971931	chr10	81290963	81294963	283.174	307
Dok7	ENSMUSG00000044716	1.51926	0.000480971	0.00698865	1050.8	366	0.0849722	0.249666	0.340344	0.733597	0.97486	chr5	35054766	35058766	1216.25	964
Ubxn11	ENSMUSG00000012126	-1.89182	0.000483286	0.00701205	6	29.4	-0.00597376	0.267521	-0.02233	0.982185	0.997464	chr4	134100570	134104570	123.129	120
NA	ENSMUSG00000101013	-1.68547	0.000484611	0.00702013	26.2	107	-0.17998	0.266125	-0.676296	0.498853	0.971931	chr5	20948989	20952989	815.327	835
NA	ENSMUSG00000094526	1.89563	0.000484249	0.00702013	18.8	3.1	0.176797	0.280139	0.631105	0.527972	NA	chr14	69388854	69392854	85.1694	68
Ypel4	ENSMUSG00000034059	2.02081	0.000490502	0.00707742	46.7	9.2	0.364004	0.268527	1.35556	0.17524	0.969126	chr2	84732058	84736058	122.034	87
Pex6	ENSMUSG00000002763	-1.14857	0.000489412	0.00707742	30.3	69.1	-0.34291	0.263512	-1.30131	0.193153	0.971931	chr17	46709463	46713463	266.605	313
Fosl1	ENSMUSG00000024912	2.12848	0.000490165	0.00707742	47.7	12.2	0.241163	0.265169	0.909471	0.363101	0.971931	chr19	5445547	5449547	120.763	98
Arhgap17	ENSMUSG00000030766	2.11838	0.000489371	0.00707742	278.9	72.4	0.200346	0.250623	0.799393	0.424063	0.971931	chr7	123367915	123371915	461.148	341
Pigu	ENSMUSG00000038383	-1.64044	0.00048987	0.00707742	37.2	160.7	-0.213187	0.269882	-0.789924	0.429572	0.971931	chr2	155355430	155359430	172.381	195
Klhdc3	ENSMUSG00000063576	1.41023	0.000496829	0.00716304	157.2	60.1	-0.144587	0.242736	-0.595655	0.551406	0.971931	chr17	46678914	46682914	850.702	866
NA	ENSMUSG00000088595	2.38924	0.000497881	0.00717255	1876.1	508.5	0.274699	0.281082	0.977291	0.328425	NA	chr6	94824923	94828923	72.4576	56
Gm4975	ENSMUSG00000094443	-1.94882	0.000501401	0.00721757	1.4	7.8	-0.00132422	0.284944	-0.00464729	0.996292	NA	chr8	63950248	63954248	61.0169	68
Pbxip1	ENSMUSG00000042613	1.84849	0.000502862	0.0072329	400.8	129.5	-0.213952	0.256189	-0.835134	0.403642	0.971931	chr3	89434706	89438706	292.212	302
Pxn	ENSMUSG00000029528	1.74813	0.000503714	0.00723945	1576.5	546.3	-0.083743	0.251477	-0.333005	0.739131	0.974955	chr5	115504676	115508676	488.088	463
Zmynd10	ENSMUSG00000010044	-2.76862	0.000505527	0.00725409	0.2	16.2	-0.132659	0.261921	-0.506485	0.612516	0.971931	chr9	107545298	107549298	154.596	165
Dzip1l	ENSMUSG00000037784	1.55894	0.000505377	0.00725409	43.9	15.3	0.290807	0.266454	1.09139	0.275099	0.971931	chr9	99627496	99631496	375.055	231
Zeb2	ENSMUSG00000026872	1.27517	0.000506338	0.00726003	227.1	95.4	-0.0599097	0.267771	-0.223735	0.822963	0.982277	chr2	45115395	45119395	565.739	520
Tcf25	ENSMUSG00000001472	1.11752	0.000507631	0.00727286	646.8	301.6	0.0568163	0.247511	0.229551	0.818441	0.981104	chr8	123371753	123375753	453.225	382
NA	ENSMUSG00000092674	2.576	0.000513457	0.00735056	39.7	4.8	0.246779	0.265575	0.929225	0.352772	0.971931	chr5	149246244	149250244	154.596	114
NA	ENSMUSG00000064352	-2.70801	0.000515845	0.00737897	3.8	138.2	NA	NA	NA	NA	NA	chrMT	4938	8938	0.127119	0.1
Atxn2l	ENSMUSG00000032637	1.25416	0.000521542	0.00745462	2143.2	889.1	-0.170522	0.258244	-0.660312	0.509053	0.971931	chr7	126501437	126505437	557.815	568
NA	ENSMUSG00000090777	-2.59677	0.000522089	0.0074566	0.5	18.5	0.276862	0.266866	1.03746	0.299522	0.971931	chr16	18215879	18219879	138.178	102
Dcp1b	ENSMUSG00000041477	-1.29181	0.000524102	0.00747951	656.4	1794.5	-0.182013	0.265016	-0.6868	0.492209	0.971931	chr6	119173253	119177253	1143.82	1208
Trem2	ENSMUSG00000023992	2.78067	0.000530223	0.0075257	0.9	0	0.3995	0.266083	1.50141	0.133249	0.935085	chr17	48344401	48348401	168.277	106
Slc25a11	ENSMUSG00000014606	-1.30459	0.000528776	0.0075257	73.1	208.3	-0.282425	0.244349	-1.15582	0.247753	0.971931	chr11	70645479	70649479	650.24	703
Stard9	ENSMUSG00000033705	1.33621	0.000528786	0.0075257	64.6	25.6	-0.210285	0.265989	-0.790576	0.429192	0.971931	chr2	120627121	120631121	329.868	337
Upf1	ENSMUSG00000058301	1.13684	0.000528737	0.0075257	138.9	64.6	-0.154608	0.243291	-0.635488	0.52511	0.971931	chr8	70351278	70355278	338.905	336
Ubr4	ENSMUSG00000066036	1.626	0.000530107	0.0075257	513.9	182.8	-0.0928778	0.253134	-0.366911	0.713685	0.974849	chr4	139350609	139354609	386.667	375
Zfp57	ENSMUSG00000036036	2.42977	0.000529154	0.0075257	11.1	1.3	0.0523913	0.268132	0.195394	0.845085	0.98487	chr17	36999163	37003163	99.1525	95
Drp2	ENSMUSG00000000223	2.02054	0.000529902	0.0075257	3	0.6	-0.0440764	0.285322	-0.15448	0.877232	NA	chrX	134402551	134406551	38.1356	41
2900076A07Rik	ENSMUSG00000097277	-2.14474	0.000532229	0.00754831	24.5	491.4	-0.348377	0.269718	-1.29163	0.196484	0.971931	chr7	81521550	81525550	236.481	282
Per1	ENSMUSG00000020893	1.73295	0.000533321	0.00755793	554.7	181.5	-0.0964985	0.249691	-0.386471	0.699148	0.974226	chr11	69093217	69097217	1223.04	1390
Srf	ENSMUSG00000015605	1.87869	0.000534614	0.00756452	278.6	91.2	-0.368371	0.255467	-1.44196	0.149315	0.945163	chr17	46554175	46558175	786.689	988
NA	ENSMUSG00000081314	-1.95592	0.000534324	0.00756452	7	44.2	-0.205895	0.282095	-0.729876	0.465466	NA	chr2	149332789	149336789	48.305	65
Lrrc45	ENSMUSG00000025145	1.83809	0.000535719	0.00757429	177.6	50.8	-0.0451758	0.265274	-0.170298	0.864776	0.98619	chr11	120711925	120715925	281.668	251
Bpgm	ENSMUSG00000038871	-2.21765	0.000536404	0.00757811	0.8	13.1	-0.194204	0.272574	-0.712484	0.476165	0.971931	chr6	34474207	34478207	350.955	352
Dffa	ENSMUSG00000028974	1.61971	0.000537497	0.00758768	195.2	63.9	0.177142	0.26282	0.674006	0.500307	0.971931	chr4	149102146	149106146	305.768	216
NA	ENSMUSG00000078889	-1.82681	0.000539435	0.00760834	5.4	33.5	-0.536522	0.277227	-1.93532	0.0529514	0.755117	chr2	175799093	175803093	72.4576	130
Ppfia3	ENSMUSG00000003863	-2.07818	0.000539794	0.00760834	0.6	7.3	-0.158131	0.254589	-0.621123	0.534519	0.971931	chr7	45365019	45369019	181.958	202
Zfpm1	ENSMUSG00000049577	1.84529	0.000544163	0.00765307	40.7	11.9	-0.1092	0.25028	-0.436314	0.662609	0.972431	chr8	122280141	122284141	705.83	648
Epg5	ENSMUSG00000039840	1.03395	0.000544224	0.00765307	101.6	50.2	-0.0528081	0.268303	-0.196822	0.843967	0.98466	chr18	77936465	77940465	277.149	242
Foxn1	ENSMUSG00000002057	2.79586	0.000543726	0.00765307	5.5	0.3	0.0443606	0.283247	0.156614	0.875549	NA	chr11	78384558	78388558	64.8305	65
Creg1	ENSMUSG00000040713	-1.66364	0.000544883	0.00765645	28.4	111.1	-0.598461	0.255127	-2.34574	0.0189895	0.503276	chr1	165761746	165765746	373.99	575
Hrh3	ENSMUSG00000039059	2.82366	0.00054597	0.00765993	1.8	0.5	-0.103357	0.263448	-0.392324	0.694819	0.973371	chr2	180102488	180106488	123.129	134
Ociad1	ENSMUSG00000029152	-1.42002	0.000545668	0.00765993	71.8	221.2	0.0489574	0.260123	0.188209	0.850713	0.984959	chr5	73290784	73294784	413.607	347
NA	ENSMUSG00000098425	2.82931	0.000547085	0.00766968	22.5	0.5	0.185496	0.276971	0.669731	0.50303	NA	chr11	96030678	96034678	83.8982	71
NA	ENSMUSG00000074183	2.43781	0.000549128	0.00769243	39.4	4.8	0.0274687	0.258303	0.106343	0.91531	0.990886	chr9	78228656	78232656	469.072	406
Foxp4	ENSMUSG00000023991	1.90758	0.000551482	0.00771948	220.7	69.8	-0.083285	0.266915	-0.312028	0.755019	0.977633	chr17	47922645	47926645	307.274	282
Zbtb38	ENSMUSG00000040433	1.30252	0.000552385	0.0077262	674.3	279.5	0.375456	0.255202	1.47121	0.141234	0.941022	chr9	96750831	96754831	1435.24	859
NA	ENSMUSG00000081817	-2.36082	0.000555678	0.00776632	0.7	20.2	-0.100302	0.284926	-0.352028	0.724817	NA	chr2	62668370	62672370	61.0169	75
Palld	ENSMUSG00000058056	1.30546	0.000557062	0.00777971	2716.1	1111.7	-0.219572	0.265307	-0.827613	0.40789	0.971931	chr8	61900690	61904690	911.346	969
NA	ENSMUSG00000097644	-2.5718	0.000558673	0.00779029	0.3	27.4	-0.479573	0.263242	-1.8218	0.068486	0.815127	chr7	93004982	93008982	614.864	804
Plekhg3	ENSMUSG00000052609	1.75428	0.000558615	0.00779029	87.1	25.7	-0.0224628	0.266916	-0.0841568	0.932932	0.993455	chr12	76528891	76532891	119.025	117
Dot1l	ENSMUSG00000061589	1.8258	0.00056262	0.00783935	1746.3	561.9	-0.041211	0.249625	-0.165092	0.868872	0.986783	chr10	80753206	80757206	987.152	891
NA	ENSMUSG00000090004	-2.27538	0.000563146	0.0078407	10.6	229.8	-0.254382	0.268707	-0.94669	0.343797	0.971931	chr13	74338539	74342539	108.08	134
Shisa3	ENSMUSG00000050010	1.61157	0.000565947	0.00786422	27.1	8.3	0.184215	0.265386	0.69414	0.487594	0.971931	chr5	67605882	67609882	206.584	158
Tacc1	ENSMUSG00000065954	1.53561	0.000565579	0.00786422	83.8	29.6	-0.223996	0.26151	-0.856548	0.391695	0.971931	chr8	25254588	25258588	123.129	146
Prph	ENSMUSG00000023484	2.65785	0.000566127	0.00786422	6.6	0.7	0.128166	0.280876	0.456307	0.648169	NA	chr15	99053174	99057174	95.3389	88
Tpm1	ENSMUSG00000032366	1.69581	0.000569661	0.00790729	14769.9	4999.4	-0.160605	0.252275	-0.636628	0.524367	0.971931	chr9	67047406	67051406	909.662	925
Mapk7	ENSMUSG00000001034	1.68928	0.000573048	0.00794827	44.9	11.5	0.0580198	0.268539	0.216057	0.828943	0.982981	chr11	61492406	61496406	340.412	266
NA	ENSMUSG00000087051	-2.6649	0.000575665	0.0079785	1.3	57.8	-0.325051	0.272785	-1.1916	0.233418	0.971931	chr4	106289269	106293269	97.1353	135
NA	ENSMUSG00000088942	-2.82231	0.00057731	0.00799524	0.9	72.9	0.0597085	0.28089	0.212569	0.831663	NA	chr8	77192695	77196695	61.0169	61
Grk4	ENSMUSG00000052783	1.84368	0.000578236	0.008002	128.8	40.3	-0.0700592	0.277897	-0.252105	0.80096	0.980421	chr5	34658379	34662379	375.055	333
Snhg11	ENSMUSG00000044349	1.38915	0.000579223	0.00800959	154.5	59.4	-0.188621	0.2793	-0.675334	0.499464	NA	chr2	158373638	158377638	57.2033	75
NA	ENSMUSG00000089743	-2.66167	0.00058263	0.0080506	0.4	17.3	0.243338	0.285002	0.853812	0.393209	NA	chr5	99680410	99684410	63.5593	51
Samd1	ENSMUSG00000079003	1.88898	0.000586232	0.00809159	92.3	25.8	-0.364431	0.252739	-1.44193	0.149323	0.945163	chr8	83995672	83999672	339.126	433
Exd1	ENSMUSG00000048647	1.28664	0.000586925	0.00809159	23.6	9.1	-0.245173	0.263916	-0.928982	0.352898	0.971931	chr2	119545627	119549627	623.287	641
Lars2	ENSMUSG00000035202	2.23576	0.000586802	0.00809159	62750.5	17761.8	-0.0154877	0.260867	-0.0593699	0.952657	0.994275	chr9	123364927	123368927	269.618	230
Pnpla6	ENSMUSG00000004565	1.7577	0.000589228	0.00811118	48.4	14.5	-0.19172	0.246711	-0.777106	0.437096	0.971931	chr8	3513384	3517384	381.913	416
Tet3	ENSMUSG00000034832	1.47683	0.000589234	0.00811118	167.8	59.1	-0.134294	0.264623	-0.507493	0.611809	0.971931	chr6	83457084	83461084	114.921	126
Abi3bp	ENSMUSG00000035258	1.49455	0.000591956	0.00814251	53.6	17.7	-0.175709	0.28113	-0.62501	0.531965	0.971931	chr16	56475878	56479878	127.234	141
Synj1	ENSMUSG00000022973	1.69733	0.000594503	0.00816868	391.9	135.3	-0.30072	0.269992	-1.11381	0.26536	0.971931	chr16	91009308	91013308	314.805	353
Nnt	ENSMUSG00000025453	-1.45533	0.000594752	0.00816868	252.1	833.5	-0.243799	0.243871	-0.999707	0.317453	0.971931	chr13	119406997	119410997	1138.76	1295
NA	ENSMUSG00000065716	-2.73446	0.000596574	0.00818754	1.4	62.2	-0.470713	0.278295	-1.69142	0.0907568	0.870814	chrX	169693899	169697899	91.6629	143
Usp50	ENSMUSG00000027364	-2.06388	0.00059827	0.00819721	3	44.4	0.194863	0.27422	0.710606	0.477328	0.971931	chr2	126781470	126785470	106.78	91
Cox6b1	ENSMUSG00000036751	-1.48881	0.000598624	0.00819721	59.8	186.2	-0.0882133	0.254277	-0.346918	0.728653	0.974849	chr7	30624151	30628151	543.553	514
NA	ENSMUSG00000083832	-2.45487	0.000598079	0.00819721	1.8	41.8	-0.211383	0.271058	-0.779844	0.435483	NA	chr2	91639922	91643922	78.8135	101
Abcc1	ENSMUSG00000023088	1.09581	0.000601331	0.0082281	406.7	190.1	-0.0236114	0.262909	-0.0898086	0.928439	0.993009	chr16	14359558	14363558	854.071	758
Dbnl	ENSMUSG00000020476	1.73411	0.000607202	0.00830221	215.6	71.2	0.137403	0.255285	0.538234	0.590415	0.971931	chr11	5786488	5790488	632.296	484
Plec	ENSMUSG00000022565	1.81377	0.000607934	0.00830601	1233.7	393.6	0.0365597	0.248488	0.147129	0.883031	0.990253	chr15	76230574	76234574	280.162	233
Esyt3	ENSMUSG00000037681	-2.21524	0.000608857	0.0083124	0.5	8	0.0609566	0.282146	0.216046	0.828952	NA	chr9	99356557	99360557	68.644	68
Phospho2	ENSMUSG00000027088	-1.52844	0.000611033	0.00832966	9.4	31.1	-0.286182	0.268772	-1.06478	0.286977	0.971931	chr2	69787623	69791623	289.199	321
Tmed5	ENSMUSG00000063406	-1.87767	0.000610621	0.00832966	12.8	70.8	-0.232843	0.268605	-0.866859	0.386019	0.971931	chr5	108130620	108134620	314.805	331
Slc39a6	ENSMUSG00000024270	2.16327	0.000612115	0.00833819	17.2	3.5	0.201053	0.262505	0.765902	0.443735	0.971931	chr18	24601817	24605817	221.633	169
Itga9	ENSMUSG00000039115	1.33965	0.000612745	0.00834055	351.5	142.6	0.143715	0.265364	0.541578	0.588109	0.971931	chr9	118604690	118608690	633.881	468
Zzef1	ENSMUSG00000055670	0.975697	0.000615845	0.00837649	293.6	148.3	0.0809652	0.255711	0.316627	0.751526	0.977354	chr11	72794226	72798226	781.635	588
Begain	ENSMUSG00000040867	2.53475	0.000616971	0.00838557	4.5	0.6	-0.051753	0.279213	-0.185353	0.852952	NA	chr12	109066217	109070217	68.644	78
Phlda3	ENSMUSG00000041801	2.62965	0.000618669	0.00839147	9.7	0.5	0.775672	0.264997	2.9271	0.00342139	0.234532	chr1	135764119	135768119	328.345	140
Ctnnd1	ENSMUSG00000034101	1.85215	0.000618013	0.00839147	142.8	45.3	-0.306737	0.273787	-1.12035	0.262565	0.971931	chr2	84648765	84652765	694.038	773
Myo1e	ENSMUSG00000032220	1.36788	0.000618783	0.00839147	136.3	50.2	0.0588448	0.265941	0.22127	0.824883	0.982593	chr9	70205350	70209350	534.045	429
Tanc1	ENSMUSG00000035168	1.15618	0.000621277	0.00840657	80.8	36.7	-0.209257	0.245987	-0.850683	0.394946	0.971931	chr2	59610042	59614042	560.984	593
Hivep1	ENSMUSG00000021366	1.55403	0.000620823	0.00840657	279.1	103.9	-0.113775	0.256433	-0.443684	0.657271	0.972431	chr13	42050021	42054021	1002.31	960
NA	ENSMUSG00000078891	-1.81576	0.000620469	0.00840657	11.2	48.4	-0.0802703	0.273416	-0.293582	0.769077	NA	chr2	176095450	176099450	15.2542	19
Tcf3	ENSMUSG00000020167	1.68144	0.000623431	0.00841941	194.5	65	-0.402897	0.258052	-1.56131	0.118452	0.916268	chr10	80431647	80435647	290.705	360
NA	ENSMUSG00000086675	-1.11441	0.000623609	0.00841941	49.6	112.5	0.0416276	0.254606	0.163498	0.870126	0.986991	chr6	32449170	32453170	271.124	221
Fam53c	ENSMUSG00000034300	1.80666	0.000623132	0.00841941	97.7	31.8	-0.00790565	0.25385	-0.031143	0.975156	0.997117	chr18	34756906	34760906	958.514	831
Epha5	ENSMUSG00000029245	2.17509	0.000627945	0.0084717	4	0.7	0.112259	0.280717	0.399902	0.689229	NA	chr5	84415382	84419382	72.4576	69
NA	ENSMUSG00000086806	2.17689	0.000629898	0.00848551	83.7	14.2	0.198586	0.258062	0.769529	0.441579	0.971931	chr4	148002014	148006014	800.166	541
NA	ENSMUSG00000062561	-1.74363	0.000629556	0.00848551	200.5	1008.9	-0.302511	0.279248	-1.0833	0.278674	NA	chr10	63925434	63929434	57.2033	88
Renbp	ENSMUSG00000031387	2.29491	0.000632464	0.0085138	8.3	1.4	0.271415	0.276832	0.980434	0.326872	NA	chrX	73928850	73932850	82.627	63
Sp2	ENSMUSG00000018678	1.6343	0.000633866	0.00852638	100	34.9	0.168503	0.273447	0.616219	0.53775	0.971931	chr11	96980959	96984959	113.135	100
Cngb3	ENSMUSG00000056494	-2.79296	0.000637947	0.00856937	0	2.3	0.126083	0.283583	0.444605	0.656605	NA	chr4	19278850	19282850	52.1186	47
NA	ENSMUSG00000084875	2.75319	0.000638	0.00856937	32.7	2.3	0.15496	0.284086	0.545469	0.585431	NA	chrX	133899213	133903213	49.5762	42
Mir133a-2	ENSMUSG00000065460	-1.95515	0.000639376	0.00858004	422.4	2527.4	-0.434805	0.259206	-1.67745	0.0934545	0.872089	chr2	180396379	180400379	480.165	652
Zfp526	ENSMUSG00000046541	1.89611	0.000640204	0.00858004	251.4	78.7	-0.161511	0.239364	-0.67475	0.499834	0.971931	chr7	25219425	25223425	1062.96	1102
NA	ENSMUSG00000101939	-2.17217	0.000641699	0.00859378	10.1	73.9	-0.434498	0.254941	-1.70431	0.0883231	0.868653	chr1	24611119	24615119	3026.76	5721
Actb	ENSMUSG00000029580	0.973082	0.000642874	0.00860321	1842.6	917.8	0.0889091	0.243507	0.365119	0.715023	0.974849	chr5	142904754	142908754	1300.48	1085
Col8a2	ENSMUSG00000056174	2.72268	0.000644327	0.00861634	1.5	0	0.401297	0.274585	1.46147	0.143887	NA	chr4	126284793	126288793	106.78	73
Sipa1l2	ENSMUSG00000001995	1.39979	0.000645318	0.00862327	249.7	100.4	-0.26291	0.240345	-1.09389	0.274004	0.971931	chr8	125567808	125571808	747.944	829
Fam189a2	ENSMUSG00000071604	1.35134	0.000647196	0.00864205	211.1	78.2	-0.202064	0.253373	-0.797496	0.425163	0.971931	chr19	24029019	24033019	931.561	978
Tdrkh	ENSMUSG00000041912	2.57559	0.000648597	0.00864812	2	0.1	-0.218945	0.264847	-0.826687	0.408414	0.971931	chr3	94411273	94415273	109.448	130
NA	ENSMUSG00000078161	-1.08159	0.00064847	0.00864812	68.2	155.6	0.293678	0.279769	1.04971	0.293849	NA	chr3	154661859	154665859	85.1694	64
NA	ENSMUSG00000088025	2.25138	0.000651114	0.00867535	167.1	35.4	0.0843203	0.284924	0.29594	0.767276	NA	chr8	3801358	3805358	72.4576	69
Tigd3	ENSMUSG00000044390	-1.9333	0.000653554	0.0087015	2.4	13.9	-0.0321445	0.268338	-0.119791	0.904649	0.990886	chr19	5892149	5896149	106.78	112
NA	ENSMUSG00000082100	1.45996	0.000654491	0.00870764	183.5	66.3	-0.0521663	0.284856	-0.183132	0.854694	NA	chr11	19718355	19722355	44.4915	51
Ddit3	ENSMUSG00000025408	-1.16942	0.000655875	0.00871336	435.4	1041.4	-0.22185	0.245891	-0.902233	0.366933	0.971931	chr10	127288774	127292774	1086.83	1404
Trim7	ENSMUSG00000040350	-1.24609	0.000655744	0.00871336	161.7	407.6	-0.31536	0.249097	-1.26601	0.205508	0.971931	chr11	48824140	48828140	362.897	437
NA	ENSMUSG00000096544	1.98855	0.000656908	0.00872074	711.1	196.1	-0.0714112	0.283924	-0.251515	0.801416	NA	chr3	124383667	124387667	44.4915	52
Elmsan1	ENSMUSG00000042507	1.45028	0.000658118	0.00873046	105.7	39.7	-0.259832	0.255512	-1.01691	0.309198	0.971931	chr12	84216881	84220881	611.495	639
Mlf1	ENSMUSG00000048416	-1.42673	0.000660252	0.00875241	99.7	308.8	-0.355347	0.251294	-1.41407	0.157341	0.951247	chr3	67372097	67376097	1004	1300
NA	ENSMUSG00000081077	-1.89296	0.000663477	0.00878879	8.6	53.7	0.285596	0.277057	1.03082	0.302624	0.971931	chr6	17710941	17714941	190.166	128
Adam8	ENSMUSG00000025473	2.06118	0.000668933	0.00884823	19.4	4.2	0.179415	0.270641	0.662928	0.507377	0.971931	chr7	139990562	139994562	111.864	94
Pln	ENSMUSG00000038583	-1.75559	0.000668867	0.00884823	573.8	2975.3	0.189202	0.273866	0.690855	0.489657	0.971931	chr10	53335667	53339667	1253.31	863
Srgap3	ENSMUSG00000030257	1.9943	0.00067298	0.00889532	17.1	4.2	0.684793	0.260849	2.62524	0.00865866	0.357239	chr6	112945266	112949266	399.155	175
Dbh	ENSMUSG00000000889	-2.20232	0.000673822	0.0089	0.9	11.7	0.149922	0.274054	0.547053	0.584342	0.971931	chr2	27163233	27167233	100.424	91
NA	ENSMUSG00000034377	1.15643	0.000674418	0.00890144	288.1	129.4	0.123189	0.260729	0.472477	0.636587	0.971931	chr17	6104437	6108437	503.935	383
Gdpgp1	ENSMUSG00000050973	-1.95116	0.000680647	0.00897718	2.5	20.5	-0.00701805	0.259469	-0.0270477	0.978422	0.997427	chr7	80230865	80234865	337.399	288
Rapgef1	ENSMUSG00000039844	1.26945	0.000681699	0.00898455	453.5	190.3	-0.0198086	0.260131	-0.0761488	0.939301	0.993679	chr2	29617720	29621720	1118.55	984
Zfp703	ENSMUSG00000085795	1.68305	0.000683813	0.00900592	52.7	15.4	-0.121066	0.239932	-0.504584	0.613851	0.971931	chr8	26975325	26979325	1129.84	1325
Raph1	ENSMUSG00000026014	1.20131	0.000685091	0.00901625	1017.4	440.6	0.0683247	0.259478	0.263316	0.792307	0.980208	chr1	60565104	60569104	1158.98	930
Clic5	ENSMUSG00000023959	0.995975	0.000690287	0.00907809	598.2	299.6	-0.166237	0.258064	-0.644169	0.519466	0.971931	chr17	44186584	44190584	1071.38	1093
Plcb1	ENSMUSG00000051177	1.74412	0.000691928	0.00909313	93.7	32	0.0626085	0.259902	0.240892	0.809639	0.981104	chr2	134784067	134788067	192.903	171
NA	ENSMUSG00000073753	-2.16752	0.000692743	0.00909729	1.8	23.7	0.0258884	0.26239	0.0986639	0.921405	0.991847	chr4	129853071	129857071	149.123	136
Wfs1	ENSMUSG00000039474	1.07099	0.000695273	0.00912396	169.6	81.2	-0.109844	0.252484	-0.435053	0.663524	0.972431	chr5	36987205	36991205	489.673	479
NA	ENSMUSG00000088368	2.10615	0.000695842	0.00912487	2328.9	616.9	-0.248419	0.282834	-0.878321	0.379769	NA	chr2	23821053	23825053	30.5084	52
Tmem2	ENSMUSG00000024754	1.51766	0.000697508	0.00914016	32.1	10.5	0.462773	0.24655	1.87699	0.0605191	0.788046	chr19	21776342	21780342	599.017	346
Gba2	ENSMUSG00000028467	1.68567	0.000700467	0.00917236	122.1	41.5	-0.192795	0.240762	-0.80077	0.423265	0.971931	chr4	43576873	43580873	541.968	577
Arl2bp	ENSMUSG00000031776	1.64092	0.000709956	0.00928995	173.1	44.9	-0.0925797	0.257528	-0.359494	0.719226	0.974849	chr8	94664600	94668600	293.718	271
Hadhb	ENSMUSG00000059447	-1.95456	0.000713839	0.00932073	61.7	436.3	-0.223371	0.24988	-0.893912	0.371369	0.971931	chr5	30153248	30157248	1106.76	1215
Atcay	ENSMUSG00000034958	-1.80218	0.000713639	0.00932073	68.2	324.3	0.180452	0.276786	0.651956	0.51443	NA	chr10	81228833	81232833	95.3389	78
Actr1b	ENSMUSG00000037351	1.49073	0.000714353	0.00932077	649.3	233.1	0.366589	0.279615	1.31105	0.189841	NA	chr1	36712422	36716422	73.7287	49
Sf3a2	ENSMUSG00000020211	1.96336	0.000715034	0.009323	88.4	27.3	-0.121674	0.245291	-0.496041	0.619865	0.971931	chr10	80796198	80800198	614.864	604
Bspry	ENSMUSG00000028392	-1.90248	0.000716393	0.00933406	3.9	23.3	-0.393428	0.275975	-1.42559	0.153986	NA	chr4	62478053	62482053	64.8305	106
NA	ENSMUSG00000091405	-2.23669	0.000727198	0.00946809	1.7	69.5	-0.0525138	0.259459	-0.202397	0.839606	0.984336	chr3	96261311	96265311	774.897	659
NA	ENSMUSG00000067344	-2.06337	0.000732178	0.00952613	4.2	92.4	0.198062	0.282564	0.700946	0.483337	NA	chr6	145264400	145268400	64.8305	55
Orai3	ENSMUSG00000043964	1.60047	0.000734922	0.00954824	87.7	25	-0.140759	0.260193	-0.54098	0.588521	0.971931	chr7	127767815	127771815	302.755	291
Praf2	ENSMUSG00000031149	2.59264	0.000737081	0.00956949	7.6	0.3	0.095349	0.26892	0.354563	0.722917	0.974849	chrX	7726439	7730439	145.019	122
Arhgap33	ENSMUSG00000036882	2.46606	0.000743443	0.00964523	27.1	4.3	0.0187502	0.263055	0.0712787	0.943176	0.994121	chr7	30533060	30537060	136.81	126
Ypel1	ENSMUSG00000022773	-1.28255	0.000748099	0.00969874	12.2	31.5	-0.279226	0.26885	-1.03859	0.298994	0.971931	chr16	17067696	17071696	82.627	113
Fbrs	ENSMUSG00000042423	1.40038	0.000750031	0.00971689	425.1	172.4	-0.161405	0.253394	-0.636971	0.524144	0.971931	chr7	127477199	127481199	956.83	960
Iqgap2	ENSMUSG00000021676	-1.18426	0.000755755	0.00975906	11.9	29.6	-0.530599	0.270739	-1.95982	0.0500171	0.742021	chr13	95890483	95894483	97.1353	159
Dnm2	ENSMUSG00000033335	1.33147	0.000755178	0.00975906	812.5	334.5	-0.30614	0.257917	-1.18697	0.235238	0.971931	chr9	21422908	21426908	469.072	554
Adnp2	ENSMUSG00000053950	1.21945	0.000756492	0.00975906	102.9	43.1	0.160364	0.260522	0.615549	0.538193	0.971931	chr18	80149482	80153482	526.121	390
Ddr1	ENSMUSG00000003534	1.54132	0.000756066	0.00975906	142	52.7	0.0988558	0.265009	0.373028	0.709128	0.974839	chr17	35702621	35706621	142.283	121
Kcnj15	ENSMUSG00000062609	2.3463	0.000754841	0.00975906	7.5	0.2	0.0705102	0.280263	0.251586	0.801361	NA	chr16	95255558	95259558	62.2881	61
NA	ENSMUSG00000084722	-1.545	0.000755063	0.00975906	52.1	178	0.0153565	0.273935	0.0560588	0.955295	NA	chr14	17883133	17887133	86.4406	88
NA	ENSMUSG00000083859	1.53658	0.000758659	0.00978012	135.6	48.4	-0.103089	0.285462	-0.361133	0.718	NA	chr11	12935938	12939938	36.8644	46
Irs2	ENSMUSG00000038894	1.83207	0.000759992	0.00979039	438.4	123	-0.20182	0.243709	-0.82812	0.407603	0.971931	chr8	11006458	11010458	1051.16	1112
Smarca2	ENSMUSG00000024921	1.69825	0.000761533	0.00980333	288.9	96.6	-0.144382	0.241037	-0.599004	0.54917	0.971931	chr19	26603050	26607050	948.407	946
Crlf1	ENSMUSG00000007888	2.63677	0.000763931	0.00981617	5.8	0.2	0.216793	0.270793	0.800585	0.423372	0.971931	chr8	70491158	70495158	114.407	92
Otoa	ENSMUSG00000034990	2.6923	0.000764143	0.00981617	4.3	0.2	0.0903024	0.275547	0.32772	0.743123	NA	chr7	121079650	121083650	90.2542	84
Sftpb	ENSMUSG00000056370	1.72601	0.000763718	0.00981617	34.1	9.2	-0.0464359	0.275649	-0.16846	0.866221	NA	chr6	72302610	72306610	87.7118	97
Axl	ENSMUSG00000002602	1.79484	0.000765901	0.00983184	101.7	32.1	-0.0889962	0.261131	-0.340811	0.733246	0.97486	chr7	25786705	25790705	206.584	211
Grpel1	ENSMUSG00000029198	-1.58487	0.000767272	0.00983561	8.6	33.4	-0.213378	0.259033	-0.823748	0.410083	0.971931	chr5	36462998	36466998	397.76	445
Gabre	ENSMUSG00000031340	2.14638	0.00076724	0.00983561	10.6	1.7	-0.310848	0.283546	-1.09629	0.272953	NA	chrX	72272803	72276803	41.9491	64
Lepre1	ENSMUSG00000028641	1.07887	0.000768173	0.00984027	62	28.8	-0.118955	0.252598	-0.470928	0.637692	0.971931	chr4	119230915	119234915	378.744	370
Vrk1	ENSMUSG00000021115	-1.78051	0.000771028	0.00986992	8.3	45.5	-0.492564	0.259256	-1.89991	0.0574444	0.777749	chr12	106008228	106012228	623.287	822
NA	ENSMUSG00000078872	-2.05451	0.000772228	0.00987835	1.5	16.1	0.361456	0.28347	1.27511	0.202269	NA	chr2	177072320	177076320	87.7118	60
Asb14	ENSMUSG00000021898	-1.90161	0.000774952	0.00990627	132.2	895.7	-0.319535	0.267722	-1.19353	0.23266	0.971931	chr14	26892557	26896557	916.4	1095
Morc2a	ENSMUSG00000034543	0.961944	0.000776903	0.00991732	359.5	185.7	-0.243681	0.254783	-0.956425	0.338857	0.971931	chr11	3647191	3651191	511.859	563
Ggnbp1	ENSMUSG00000048731	-1.02314	0.000776703	0.00991732	154.3	329.2	-0.342833	0.256474	-1.33672	0.181316	0.971931	chr17	27015987	27019987	404.099	490
NA	ENSMUSG00000090203	2.66572	0.000781041	0.00996318	9.4	0.3	0.327198	0.266358	1.22841	0.219292	0.971931	chr16	26039268	26043268	233.946	154
Lmod1	ENSMUSG00000048096	2.502	0.000782305	0.00997234	7.6	1.2	0.124906	0.284114	0.439633	0.660203	NA	chr1	135322807	135326807	74.9999	71
Col8a1	ENSMUSG00000068196	1.54493	0.000788299	0.0100417	33.8	10.6	0.107055	0.266039	0.402405	0.687386	0.972431	chr16	57752737	57756737	284.68	214
Prg4	ENSMUSG00000006014	2.2261	0.000788893	0.0100423	30.6	6.5	-0.0841887	0.268939	-0.313041	0.75425	0.977354	chr1	150464165	150468165	91.5253	103
Khdrbs3	ENSMUSG00000022332	1.83172	0.000790697	0.0100497	674.8	214.5	-0.510179	0.243289	-2.09701	0.0359927	0.680801	chr15	68926420	68930420	656.978	928
Mgat5b	ENSMUSG00000043857	1.86359	0.000790598	0.0100497	16.7	4.3	0.353893	0.266483	1.32802	0.184173	0.971931	chr11	116916863	116920863	151.859	101
Scml2	ENSMUSG00000000037	2.45741	0.000791124	0.0100497	16	2.7	-0.0235808	0.282758	-0.0833958	0.933537	NA	chrX	161080525	161084525	29.2373	33
NA	ENSMUSG00000099825	-2.51697	0.000792703	0.0100628	0.9	47.7	-0.578464	0.248255	-2.33012	0.0197999	0.517238	chr8	22396721	22400721	373.99	564
Elmo1	ENSMUSG00000041112	1.50317	0.000794853	0.0100767	75.9	25	0.122577	0.259502	0.472353	0.636675	0.971931	chr13	20088596	20092596	224.369	189
NA	ENSMUSG00000082343	-2.32102	0.000794907	0.0100767	0.9	7.8	-0.115335	0.285504	-0.40397	0.686235	NA	chr2	177420936	177424936	33.0508	42
NA	ENSMUSG00000094091	-2.53994	0.000796199	0.0100807	1.3	67.6	-0.402218	0.253376	-1.58744	0.112414	0.905366	chr11	94279873	94283873	347.05	452
Cacna2d3	ENSMUSG00000021991	-2.02491	0.000796322	0.0100807	1.5	21.4	0.0758933	0.275432	0.275543	0.782899	NA	chr14	29719864	29723864	88.983	83
Paqr9	ENSMUSG00000064225	-1.34549	0.000798387	0.0100998	22.1	60.8	-0.578096	0.239151	-2.41728	0.015637	0.462117	chr9	95557657	95561657	407.268	616
Afg3l2	ENSMUSG00000024527	0.957625	0.00080076	0.0101184	774.6	401	0.0742634	0.261614	0.283866	0.776513	0.979218	chr18	67447172	67451172	855.756	651
Habp4	ENSMUSG00000021476	1.53609	0.00080152	0.0101184	481.7	163.5	-0.0608203	0.259324	-0.234534	0.81457	0.981104	chr13	64159824	64163824	408.853	375
Hk1	ENSMUSG00000037012	1.12446	0.000801131	0.0101184	444.4	204	-0.0390909	0.268304	-0.145696	0.884161	0.990253	chr10	62377908	62381908	114.921	116
Fam228b	ENSMUSG00000050545	-2.238	0.000802643	0.0101256	0.5	17.5	-0.350518	0.269217	-1.30199	0.19292	0.971931	chr12	4767267	4771267	290.705	344
Tmem214	ENSMUSG00000038828	1.11505	0.000803926	0.0101348	142.5	65	-0.145866	0.255191	-0.571596	0.567596	0.971931	chr5	30866012	30870012	293.718	286
Epb4.1l2	ENSMUSG00000019978	1.73531	0.000805665	0.0101497	307.3	102.9	-0.163477	0.274562	-0.595412	0.551568	0.971931	chr10	25357798	25361798	340.412	334
Nol10	ENSMUSG00000061458	1.32588	0.000806948	0.0101589	73.3	28.3	0.0714318	0.266051	0.268489	0.788323	0.980041	chr12	17346458	17350458	169.645	146
Cd24a	ENSMUSG00000047139	2.64664	0.000808271	0.0101685	9.5	0.2	0.753264	0.268121	2.80941	0.00496318	0.274648	chr10	43576284	43580284	269.516	116
NA	ENSMUSG00000079645	-2.13212	0.000810718	0.0101808	6.9	93	-0.117902	0.268107	-0.439759	0.660112	0.972431	chr12	84921512	84925512	677.193	609
Slc30a2	ENSMUSG00000028836	-2.29902	0.000810918	0.0101808	0.7	9.7	0.0317429	0.272582	0.116453	0.907294	NA	chr4	134341181	134345181	87.7118	90
Dgki	ENSMUSG00000038665	-2.65581	0.000810516	0.0101808	0.1	4.8	0.0639442	0.278052	0.229972	0.818113	NA	chr6	37298184	37302184	69.9152	67
Atp8b1	ENSMUSG00000039529	1.51107	0.000816464	0.0102415	13.3	4.2	-0.486805	0.256235	-1.89984	0.0574547	0.777749	chr18	64659267	64663267	284.68	381
Trio	ENSMUSG00000022263	1.51121	0.000816872	0.0102415	929.2	340.3	-0.186557	0.236945	-0.78734	0.431083	0.971931	chr15	28023848	28027848	754.682	792
Zfp37	ENSMUSG00000028389	1.90729	0.000817758	0.0102455	20.3	4.2	0.0298908	0.285492	0.104699	0.916614	NA	chr4	62229047	62233047	49.5762	51
1700015E13Rik	ENSMUSG00000042800	-2.57004	0.00082001	0.0102667	0.4	14.4	0.174941	0.280703	0.623226	0.533136	NA	chr1	170306803	170310803	62.2881	53
NA	ENSMUSG00000082534	-1.10343	0.000821932	0.0102837	43.7	99.8	-0.400153	0.281312	-1.42245	0.154895	NA	chr2	85156642	85160642	59.7457	99
NA	ENSMUSG00000090188	-2.28641	0.000827249	0.0103361	1	12.7	-0.436803	0.271827	-1.60691	0.108074	0.902689	chr8	94833717	94837717	473.826	644
Gpnmb	ENSMUSG00000029816	2.52209	0.000827118	0.0103361	1.9	0.3	0.0719013	0.271983	0.26436	0.791503	NA	chr6	49034546	49038546	92.7965	90
Daam2	ENSMUSG00000040260	1.52866	0.000831999	0.0103883	17.5	5.8	-0.23884	0.262521	-0.909793	0.362932	0.971931	chr17	49562343	49566343	150.491	178
Kcp	ENSMUSG00000059022	1.31016	0.000833689	0.0104023	50.1	19.5	-0.0410223	0.263393	-0.155745	0.876234	0.988324	chr6	29505952	29509952	134.074	138
Adk	ENSMUSG00000039197	-1.21319	0.000836628	0.0104248	69	172.5	-0.223942	0.252264	-0.88773	0.374686	0.971931	chr14	21050574	21054574	926.507	994
Col27a1	ENSMUSG00000045672	1.87313	0.000836618	0.0104248	45.6	12.4	-0.0323095	0.261853	-0.123388	0.9018	0.990886	chr4	63212004	63216004	143.651	145
NA	ENSMUSG00000086019	-2.70152	0.000850024	0.0105845	0.6	46.6	0.0808733	0.280471	0.288349	0.77308	NA	chr6	147717451	147721451	64.8305	64
Itgad	ENSMUSG00000070369	-1.66838	0.000863853	0.0107493	33.6	156.5	-0.65049	0.258906	-2.51245	0.0119895	0.419611	chr7	128152376	128156376	331.203	551
Lox	ENSMUSG00000024529	2.56612	0.000865733	0.0107581	2.6	0.1	0.805397	0.271269	2.969	0.00298772	0.222359	chr18	52527867	52531867	190.166	76
Cyp20a1	ENSMUSG00000049439	1.2147	0.000865361	0.0107581	35.6	14.1	-0.109992	0.244521	-0.449826	0.652836	0.971931	chr1	60341323	60345323	415.192	418
0610009L18Rik	ENSMUSG00000043644	-2.36861	0.000868368	0.0107835	1.5	39.1	-0.205752	0.239135	-0.860402	0.389567	0.971931	chr11	120346678	120350678	1180.02	1486
NA	ENSMUSG00000091478	-1.64827	0.000869475	0.0107899	177.9	732.1	-0.165569	0.258075	-0.641556	0.521161	0.971931	chr11	100360126	100364126	136.81	152
Zbtb20	ENSMUSG00000022708	-0.793245	0.000870396	0.010794	727.9	1291	-0.190753	0.250002	-0.763005	0.44546	0.971931	chr16	42873881	42877881	1174.14	1234
Dleu2	ENSMUSG00000097589	-1.40677	0.000873151	0.0108135	27.1	73.8	-0.0857456	0.237761	-0.360637	0.718371	0.974849	chr14	61680373	61684373	1139.88	1314
NA	ENSMUSG00000092571	2.55309	0.000872698	0.0108135	33.3	7.9	0.44491	0.275367	1.6157	0.10616	NA	chr17	33862228	33866228	104.237	67
St8sia1	ENSMUSG00000030283	1.86074	0.000875316	0.0108276	22.3	7	0.171323	0.266392	0.643123	0.520144	0.971931	chr6	142962452	142966452	116.949	102
Col6a3	ENSMUSG00000048126	1.201	0.000875482	0.0108276	50.9	22.9	0.335531	0.263484	1.27344	0.202862	0.971931	chr1	90841971	90845971	164.172	113
9530051G07Rik	ENSMUSG00000085982	-2.55283	0.000877973	0.0108485	0.2	4.1	-0.436151	0.273527	-1.59454	0.110815	0.903892	chrX	153035629	153039629	81.3559	133
Ehmt2	ENSMUSG00000013787	1.6305	0.000878359	0.0108485	310.1	111	-0.325589	0.256195	-1.27087	0.203777	0.971931	chr17	34896469	34900469	450.055	537
Sv2a	ENSMUSG00000038486	1.93584	0.000880136	0.0108485	30.1	7.7	-0.247009	0.255686	-0.966064	0.334012	0.971931	chr3	96179151	96183151	345.465	393
Fam134a	ENSMUSG00000049339	2.24203	0.000879564	0.0108485	26.5	7.7	0.123981	0.265455	0.467052	0.640462	0.971931	chr1	75140778	75144778	484.919	374
NA	ENSMUSG00000085625	2.11771	0.000879518	0.0108485	102.2	28.2	0.0829704	0.272811	0.304131	0.761028	NA	chr3	84551452	84555452	94.0677	91
Ccr10	ENSMUSG00000044052	-2.24758	0.00088074	0.0108486	0.6	15.9	-0.390664	0.252528	-1.54701	0.12186	0.920462	chr11	101173443	101177443	386.667	494
St5	ENSMUSG00000031024	1.4442	0.000887801	0.0109258	452.5	166.6	0.511896	0.256443	1.99614	0.0459189	0.726753	chr7	109701605	109705605	300.983	173
Lrfn4	ENSMUSG00000045045	1.75934	0.000888205	0.0109258	87.3	25.1	-0.409123	0.256335	-1.59604	0.110479	0.903892	chr19	4613667	4617667	290.705	364
Sptbn5	ENSMUSG00000074899	1.77348	0.000893731	0.0109864	52.3	16.6	0.388761	0.255762	1.52001	0.128509	0.932063	chr2	120083678	120087678	454.886	264
Mrpl50	ENSMUSG00000044018	-1.74545	0.000895991	0.0110068	4.6	17.7	-0.341311	0.266328	-1.28155	0.200002	0.971931	chr4	49519093	49523093	410.438	501
NA	ENSMUSG00000065387	-2.68341	0.00090224	0.0110761	1.4	40.4	0.177052	0.275004	0.643818	0.519694	NA	chr9	65834353	65838353	102.966	87
NA	ENSMUSG00000045799	1.86433	0.000909392	0.0111564	338.4	100.9	0.289852	0.285526	1.01515	0.310033	NA	chr14	8798335	8802335	52.1186	37
Stpg1	ENSMUSG00000028801	-1.90345	0.000910163	0.0111583	1.4	15.2	-0.328522	0.257541	-1.27561	0.202093	0.971931	chr4	135492790	135496790	340.711	403
Lrrc4b	ENSMUSG00000047085	-1.38962	0.000912311	0.0111772	87.5	283.2	-0.276895	0.283656	-0.976166	0.328982	NA	chr7	44427018	44431018	52.1186	81
Srgap2	ENSMUSG00000026425	1.42282	0.000913481	0.011184	95.1	36.6	0.14065	0.241713	0.581889	0.560642	0.971931	chr1	131525352	131529352	980.413	758
Tmem86a	ENSMUSG00000010307	-2.39505	0.000916913	0.0112185	1.4	27	-0.604591	0.243285	-2.48511	0.012951	0.430144	chr7	47048601	47052601	576.119	827
NA	ENSMUSG00000100010	2.69982	0.000923094	0.0112866	8.9	0.2	-0.117992	0.285093	-0.413873	0.678967	NA	chr3	7952889	7956889	40.6779	50
Nlgn2	ENSMUSG00000051790	2.04791	0.000924767	0.0112919	28.7	8.1	-0.302703	0.2453	-1.23401	0.217199	0.971931	chr11	69835784	69839784	415.192	484
NA	ENSMUSG00000034205	1.49027	0.000924274	0.0112919	11.2	3.5	0.0802775	0.281504	0.285173	0.775511	NA	chr14	69607068	69611068	74.9999	70
3110057O12Rik	ENSMUSG00000037818	-1.35124	0.000927935	0.011323	46.1	139.2	-0.270975	0.262873	-1.03082	0.302626	0.971931	chr3	40844970	40848970	687.3	739
NA	ENSMUSG00000073867	2.08715	0.000929856	0.0113389	270.8	87.7	-0.268196	0.255038	-1.05159	0.292987	0.971931	chr7	110059325	110063325	1370.72	1815
Mta1	ENSMUSG00000021144	1.38464	0.000937296	0.011422	309.7	126.8	-0.251455	0.258646	-0.972199	0.330951	0.971931	chr12	113096278	113100278	266.605	285
Pcdh1	ENSMUSG00000051375	1.47635	0.000938553	0.0114297	111.8	40.3	0.0705871	0.251624	0.280526	0.779074	0.98003	chr18	38210053	38214053	277.149	221
Bahd1	ENSMUSG00000040007	1.83068	0.000941799	0.0114616	62.8	18.8	-0.147296	0.255421	-0.57668	0.564156	0.971931	chr2	118898377	118902377	421.531	420
Atp6v0a2	ENSMUSG00000038023	1.34412	0.000947733	0.0115137	88.4	35.4	-0.400973	0.267777	-1.49741	0.134286	0.935085	chr5	124626576	124630576	281.668	354
Cic	ENSMUSG00000005442	1.50951	0.000947975	0.0115137	420.9	159	-0.193165	0.244417	-0.79031	0.429347	0.971931	chr7	25265704	25269704	766.474	798
Ccdc112	ENSMUSG00000071855	2.07769	0.000947018	0.0115137	15.9	3.2	0.179471	0.270329	0.663899	0.506755	NA	chr18	46309928	46313928	100.424	86
Micall1	ENSMUSG00000033039	1.83138	0.000950376	0.0115352	771.8	255.5	0.149358	0.244345	0.611258	0.541029	0.971931	chr15	79106898	79110898	1339.22	1052
Erich6	ENSMUSG00000070471	1.61216	0.000955463	0.0115893	26.7	8.6	0.125552	0.267804	0.468821	0.639197	0.971931	chr3	58635207	58639207	128.602	107
Mettl11b	ENSMUSG00000040113	-2.65345	0.000969034	0.0117461	0.1	5.6	-0.44432	0.269044	-1.65147	0.098642	0.883419	chr1	163723232	163727232	98.5034	151
NA	ENSMUSG00000022639	2.01313	0.000970664	0.011758	16.3	3.5	0.293746	0.269136	1.09144	0.275078	0.971931	chr16	50730773	50734773	214.792	147
NA	ENSMUSG00000032443	-2.11885	0.000973234	0.0117762	1.8	28.9	-0.195336	0.263868	-0.74028	0.45913	0.971931	chr9	118038259	118042259	448.471	464
Serinc2	ENSMUSG00000023232	2.61548	0.000973457	0.0117762	2.8	0.1	-0.0570137	0.275231	-0.207149	0.835894	NA	chr4	130277205	130281205	72.4576	79
Zxdb	ENSMUSG00000073062	1.54209	0.000974736	0.0117839	51.1	19.1	-0.228101	0.268293	-0.850196	0.395216	0.971931	chrX	94722569	94726569	165.54	193
Rgl2	ENSMUSG00000041354	1.66022	0.000981011	0.0118519	123.4	40.1	-0.434718	0.258525	-1.68153	0.0926594	0.872089	chr17	33927543	33931543	295.224	376
Lpp	ENSMUSG00000033306	1.1489	0.000984134	0.0118818	351.5	155.5	0.108094	0.250249	0.431947	0.66578	0.972431	chr16	24391507	24395507	1287.56	1218
Efna5	ENSMUSG00000048915	1.49696	0.000986916	0.0119006	123.8	46.3	-0.0765447	0.243987	-0.313724	0.75373	0.977354	chr17	62879317	62883317	1150.55	1088
Adar	ENSMUSG00000027951	1.48074	0.000986994	0.0119006	104.1	38.6	0.0776282	0.268848	0.288744	0.772778	0.978994	chr3	89713022	89717022	311.793	241
Frs3	ENSMUSG00000023266	2.06817	0.000991265	0.0119375	45.8	12.1	-0.137254	0.26875	-0.510711	0.609554	0.971931	chr17	47687030	47691030	349.449	332
Wdfy1	ENSMUSG00000073643	1.10708	0.000991364	0.0119375	240.3	111.8	-0.192019	0.257669	-0.745217	0.456141	0.971931	chr1	79774143	79778143	263.593	267
Rn7s1	ENSMUSG00000099021	2.01463	0.000994151	0.0119632	802.6	213.9	-0.305793	0.271023	-1.12829	0.259198	0.971931	chr12	69157295	69161295	286.187	326
Ncoa7	ENSMUSG00000039697	1.92599	0.000995612	0.0119729	9.4	1.8	0.101315	0.269134	0.376448	0.706584	0.974839	chr10	30801326	30805326	220.265	181
Pigf	ENSMUSG00000024145	-2.26721	0.000998253	0.0119968	0.9	16.4	-0.100672	0.261523	-0.384945	0.700278	0.974723	chr17	87023406	87027406	198.375	205
St3gal2	ENSMUSG00000031749	1.51957	0.000999473	0.0120035	39.5	14.1	0.141974	0.239415	0.593002	0.55318	0.971931	chr8	110917922	110921922	524.536	414
Rtl1	ENSMUSG00000085925	1.93432	0.00100189	0.0120247	8.8	2	0.252241	0.282007	0.894448	0.371082	NA	chr12	109598330	109602330	68.644	53
Stk40	ENSMUSG00000042608	0.954859	0.00100363	0.0120377	126.7	64.8	0.274037	0.239115	1.14605	0.251776	0.971931	chr4	126101957	126105957	1448.72	1018
Serpina3m	ENSMUSG00000079012	2.64349	0.0010045	0.0120401	3.6	0.1	0.0671095	0.285301	0.235223	0.814035	NA	chr12	104336486	104340486	67.3728	67
Il17rb	ENSMUSG00000015966	-2.00024	0.00101769	0.0121902	2.1	12.8	-0.04392	0.262982	-0.167008	0.867364	0.986679	chr14	30006896	30010896	134.074	133
Snx16	ENSMUSG00000027534	-2.01686	0.00102367	0.0122458	4	36.9	-0.133158	0.273753	-0.486417	0.626672	0.971931	chr3	10438102	10442102	292.212	278
Rad9b	ENSMUSG00000038569	-1.5578	0.00102347	0.0122458	7.8	32.2	0.0637654	0.265481	0.240188	0.810185	0.981104	chr5	122352233	122356233	298.237	232
Gpr22	ENSMUSG00000044067	-2.02122	0.00102761	0.0122849	4.4	41.3	-0.0964534	0.266447	-0.361998	0.717353	0.974849	chr12	31711947	31715947	1219.62	1194
Brpf1	ENSMUSG00000001632	1.78569	0.00103184	0.0123274	270.8	93.5	-0.00246531	0.244524	-0.0100821	0.991956	0.999347	chr6	113305137	113309137	896.185	801
B9d1	ENSMUSG00000001039	2.16348	0.00103404	0.0123456	22.9	3.3	-0.0970053	0.25646	-0.378248	0.705247	0.974839	chr11	61503144	61507144	194.271	201
NA	ENSMUSG00000095438	-1.73941	0.00103742	0.0123778	107.6	578.2	0.0374444	0.268269	0.139578	0.888994	0.990253	chr18	10783883	10787883	906.293	743
Rbm12b1	ENSMUSG00000046667	-0.950905	0.00104229	0.0124197	109.7	222.7	-0.139866	0.257936	-0.54225	0.587646	0.971931	chr4	12138264	12142264	400.93	394
Cnnm4	ENSMUSG00000037408	1.82898	0.0010447	0.0124404	63.4	20.2	-0.235954	0.268167	-0.879877	0.378926	0.971931	chr1	36469620	36473620	242.506	260
Tmx1	ENSMUSG00000021072	-1.38957	0.00104889	0.0124822	25.5	78	-0.175378	0.266111	-0.659041	0.509869	0.971931	chr12	70451095	70455095	408.853	417
Syne2	ENSMUSG00000063450	1.39385	0.00105069	0.0124954	95.4	37.8	-0.190076	0.255988	-0.742521	0.457772	0.971931	chr12	75816134	75820134	209.32	235
Rgs5	ENSMUSG00000026678	-2.14746	0.00105526	0.0125416	3.7	52.6	-0.20787	0.278552	-0.746251	0.455516	NA	chr1	169653501	169657501	66.1016	89
Ptcd2	ENSMUSG00000021650	-1.48588	0.00105647	0.0125478	29.6	100.9	-0.332357	0.251464	-1.32169	0.186272	0.971931	chr13	99342705	99346705	362.897	435
Sptan1	ENSMUSG00000057738	1.05533	0.00105889	0.0125586	992.5	462	0.175739	0.269068	0.653138	0.513667	0.971931	chr2	29963560	29967560	662.405	477
NA	ENSMUSG00000082570	-2.05802	0.00105899	0.0125586	12.2	80.4	0.227962	0.262531	0.868323	0.385217	0.971931	chr16	43310594	43314594	221.633	166
Aff1	ENSMUSG00000029313	1.719	0.00105944	0.0125586	753.5	266.6	-0.0190245	0.253102	-0.0751654	0.940083	0.993679	chr5	103690374	103694374	785.005	655
Tmem140	ENSMUSG00000057137	-2.0554	0.00106078	0.0125663	8.7	32.7	-0.399796	0.258179	-1.54852	0.121496	0.919126	chr6	34861146	34865146	524.536	668
Wdfy3	ENSMUSG00000043940	1.28171	0.00106396	0.0125958	191.1	82.5	-0.255927	0.273076	-0.937204	0.348654	0.971931	chr5	102067921	102071921	268.112	291
Cul7	ENSMUSG00000038545	1.517	0.00106966	0.0126551	89.8	33.2	-0.154376	0.248112	-0.622203	0.533808	0.971931	chr17	46648337	46652337	378.744	395
Pygo1	ENSMUSG00000034910	-1.14498	0.00107941	0.0127622	11.7	28.4	-0.775825	0.259017	-2.99526	0.00274208	0.216446	chr9	72923645	72927645	209.368	376
LOC102633371	ENSMUSG00000086736	-2.2577	0.00108362	0.0128037	1.3	40.8	0.0499368	0.27077	0.184425	0.85368	0.984959	chrX	100739093	100743093	462.733	377
Mef2d	ENSMUSG00000001419	1.12149	0.00108734	0.0128393	1709.1	793.9	-0.185811	0.252694	-0.73532	0.462145	0.971931	chr3	88140372	88144372	1982.95	2458
Arhgap31	ENSMUSG00000022799	1.54889	0.00108883	0.0128486	43.3	15	0.0961732	0.262124	0.366899	0.713694	0.974849	chr16	38711274	38715274	323.843	245
Sod2	ENSMUSG00000006818	-1.62261	0.00109212	0.0128791	47.3	203.6	-0.275865	0.249386	-1.10618	0.26865	0.971931	chr17	13004846	13008846	507.105	581
Hsd3b2	ENSMUSG00000063730	1.50539	0.00109387	0.0128914	10.5	3.5	0.108852	0.285523	0.381237	0.703028	NA	chr3	98722543	98726543	54.661	53
Myl9	ENSMUSG00000067818	1.95955	0.00109709	0.0129081	28.7	5.1	0.482042	0.259103	1.86042	0.0628256	0.795489	chr2	156773420	156777420	283.197	168
NA	ENSMUSG00000086527	-1.90651	0.00109811	0.0129081	3.4	35.4	-0.440163	0.263274	-1.67188	0.0945476	0.87246	chr6	121224153	121228153	265.099	343
Srrt	ENSMUSG00000037364	1.64767	0.00109763	0.0129081	879.7	315.8	-0.369589	0.266826	-1.38513	0.166013	0.95809	chr5	137305674	137309674	287.693	347
Cd93	ENSMUSG00000027435	-1.85554	0.00109753	0.0129081	6.1	37.5	-0.188221	0.267222	-0.704359	0.481209	0.971931	chr2	148441563	148445563	263.593	267
Dgkd	ENSMUSG00000070738	0.944401	0.00109971	0.0129119	264.4	137.8	-0.112922	0.254998	-0.442836	0.657884	0.972431	chr1	87851287	87855287	687.3	623
Pkd1	ENSMUSG00000032855	1.41854	0.00109985	0.0129119	173.7	70	-0.0572007	0.246713	-0.231851	0.816654	0.981104	chr17	24547834	24551834	541.968	501
5330413P13Rik	ENSMUSG00000086822	-2.47583	0.00110479	0.012945	0.2	4.9	-0.257133	0.256907	-1.00088	0.316887	0.971931	chr2	131845683	131849683	257.568	279
NA	ENSMUSG00000088119	-2.30509	0.00110476	0.012945	5.5	229.9	0.137084	0.258041	0.531247	0.595248	0.971931	chr11	118179035	118183035	223.001	182
Tln2	ENSMUSG00000052698	1.60532	0.00110456	0.012945	316.7	113.7	0.0487071	0.26665	0.182663	0.855063	0.985175	chr9	67557703	67561703	123.129	112
Sec16b	ENSMUSG00000026589	2.05793	0.00111058	0.0130045	25.1	7	0.27087	0.268285	1.00963	0.312671	0.971931	chr1	157504728	157508728	120.763	94
Rabep2	ENSMUSG00000030727	1.60808	0.00111313	0.0130233	110.7	36.9	-0.383872	0.255969	-1.49968	0.133698	0.935085	chr7	126426759	126430759	173.749	234
Itga11	ENSMUSG00000032243	2.1116	0.00111396	0.0130233	24.5	5.4	0.291669	0.262811	1.10981	0.267082	0.971931	chr9	62675826	62679826	151.859	108
Rin3	ENSMUSG00000044456	2.03418	0.00111433	0.0130233	118.5	29.9	0.0596312	0.262871	0.226846	0.820543	0.981804	chr12	102281048	102285048	396.143	313
Gm14762	ENSMUSG00000078314	-1.51615	0.00111583	0.0130325	12.3	42.3	0.0736213	0.285556	0.257818	0.796548	NA	chrX	85823892	85827892	39.4067	39
Txnl4a	ENSMUSG00000057130	-1.5864	0.00111948	0.0130668	11.9	46	0.00277697	0.271371	0.0102331	0.991835	0.999347	chr18	80204795	80208795	304.262	249
NA	ENSMUSG00000027551	1.5258	0.00112724	0.0131487	180.9	67.7	0.210573	0.249192	0.845021	0.398099	0.971931	chr2	168953587	168957587	502.351	370
Ctage5	ENSMUSG00000021000	-0.958974	0.00112866	0.0131487	311.1	634.7	0.103163	0.283243	0.36422	0.715694	NA	chr12	59093799	59097799	53.3898	47
Fbxw2	ENSMUSG00000035949	-1.61193	0.00113123	0.0131702	50.5	221	-0.121991	0.264342	-0.461488	0.644449	0.971931	chr2	34824311	34828311	173.749	183
NA	ENSMUSG00000085194	2.23523	0.00113746	0.0132344	1029.1	340.2	-0.26591	0.251083	-1.05905	0.289577	0.971931	chr7	81057113	81061113	1162.82	1534
Ackr4	ENSMUSG00000079355	-1.723	0.00113972	0.0132522	26.6	134.8	0.157658	0.277305	0.568537	0.56967	NA	chr9	104124933	104128933	94.0677	85
Oxnad1	ENSMUSG00000021906	-1.54929	0.00114046	0.0132524	25.7	102.4	-0.146559	0.264961	-0.553135	0.580171	0.971931	chr14	32083374	32087374	786.689	732
Fitm2	ENSMUSG00000048486	-1.61648	0.00114237	0.0132657	26.6	106	-0.271467	0.245799	-1.10443	0.269408	0.971931	chr2	163470629	163474629	928.192	1066
NA	ENSMUSG00000067063	-1.84536	0.00114305	0.0132657	25.2	296.4	-0.0835847	0.254986	-0.327802	0.743062	0.976504	chr19	56753346	56757346	289.199	267
NA	ENSMUSG00000086677	-2.35271	0.00115596	0.013407	0.5	9.4	0.0463735	0.263051	0.176291	0.860065	0.986068	chr11	62919592	62923592	421.531	345
Psmc4	ENSMUSG00000030603	1.74083	0.00116121	0.0134593	349.4	112.8	-0.28927	0.263739	-1.0968	0.272728	0.971931	chr7	28048101	28052101	168.277	208
Slc6a20a	ENSMUSG00000036814	-2.43991	0.00116358	0.0134781	0.1	4.6	0.260204	0.279487	0.931007	0.35185	NA	chr9	123676885	123680885	83.8982	63
Mettl21c	ENSMUSG00000047343	-2.20556	0.00116515	0.0134878	0.6	23.6	0.0592852	0.283953	0.208785	0.834616	NA	chr1	44018034	44022034	73.7287	74
3110082I17Rik	ENSMUSG00000053553	2.37906	0.00117275	0.0135595	18.2	2.5	-0.114331	0.256146	-0.446351	0.655343	0.971981	chr5	139458527	139462527	158.7	169
Mettl7a3	ENSMUSG00000058057	-1.59067	0.00117283	0.0135595	15	62.1	0.0863827	0.273614	0.31571	0.752223	NA	chr15	100332929	100336929	90.2542	85
NA	ENSMUSG00000091661	2.52604	0.0011745	0.0135617	24.7	1.9	0.371647	0.267992	1.38678	0.165508	0.95809	chr9	123789289	123793289	279.093	174
Rgs22	ENSMUSG00000037627	-2.55872	0.00117399	0.0135617	0.2	6.1	0.315057	0.271393	1.16089	0.245687	NA	chr15	36138400	36142400	105.508	79
Ogg1	ENSMUSG00000030271	1.66457	0.00117633	0.0135742	23.5	5.7	-0.100398	0.258834	-0.387888	0.698099	0.973963	chr6	113324972	113328972	576.831	551
Rn7s2	ENSMUSG00000099250	1.99175	0.00117832	0.0135801	789.7	211.4	-0.181161	0.264172	-0.685768	0.492859	0.971931	chr12	69359481	69363481	271.124	270
NA	ENSMUSG00000101107	2.23654	0.00117828	0.0135801	33.6	8.8	-0.00896549	0.285329	-0.0314216	0.974933	NA	chrY	871309	875309	31.7796	33
Cdsn	ENSMUSG00000039518	2.54112	0.00117916	0.0135808	3.3	0.2	0.135439	0.268781	0.503902	0.61433	0.971931	chr17	35550128	35554128	258.571	209
Arl4c	ENSMUSG00000049866	1.52315	0.00117988	0.0135808	50	15.6	0.293172	0.257528	1.13841	0.254949	0.971931	chr1	88700221	88704221	716.285	463
Lepr	ENSMUSG00000057722	-2.30476	0.00118121	0.0135876	0.2	2.1	-0.290933	0.276053	-1.0539	0.291927	NA	chr4	101715404	101719404	74.9999	105
Chaf1a	ENSMUSG00000002835	2.5366	0.00118451	0.013617	4.9	0.2	-0.134543	0.258404	-0.520669	0.602597	0.971931	chr17	56038439	56042439	169.645	182
Pacsin3	ENSMUSG00000027257	1.32683	0.00118798	0.0136483	1473.4	606.8	-0.254806	0.243421	-1.04677	0.295206	0.971931	chr2	91253954	91257954	1125.29	1279
2010111I01Rik	ENSMUSG00000021458	0.852094	0.00119188	0.0136845	708.4	390.3	-0.264158	0.269005	-0.981984	0.326108	0.971931	chr13	62962893	62966893	259.074	279
NA	ENSMUSG00000094702	-2.20894	0.00119443	0.0137052	17.6	446.3	0.412368	0.281221	1.46635	0.142554	NA	chr10	129731232	129735232	77.5423	50
Ppm1k	ENSMUSG00000037826	-1.69912	0.00119726	0.013729	10.7	54.6	-0.429751	0.253944	-1.69231	0.0905876	0.870814	chr6	57533468	57537468	893.261	1407
NA	ENSMUSG00000086522	-1.65111	0.00120038	0.0137562	23.1	88.5	-0.20669	0.25325	-0.816149	0.414415	0.971931	chr10	120897157	120901157	783.32	824
Setd1b	ENSMUSG00000038384	1.59225	0.0012026	0.013773	243.6	91.1	-0.0275962	0.246109	-0.11213	0.91072	0.990886	chr5	123140193	123144193	1137.01	1226
NA	ENSMUSG00000086732	2.11345	0.00120717	0.0138167	25.3	5.7	0.129832	0.278308	0.466506	0.640853	NA	chr6	31572967	31576967	80.0847	71
Kcnc3	ENSMUSG00000062785	1.74092	0.00121974	0.0139518	66.9	22.7	-0.369456	0.263231	-1.40354	0.160455	0.957137	chr7	44588664	44592664	186.062	251
Zfp637	ENSMUSG00000059689	-1.69822	0.00122096	0.013957	5.5	51.7	-0.132256	0.274271	-0.482211	0.629656	0.971931	chr6	117839180	117843180	265.099	249
NA	ENSMUSG00000080971	-2.64074	0.00122527	0.0139975	0.2	11.2	0.156855	0.284827	0.550702	0.581838	NA	chr10	62933698	62937698	72.4576	65
Ccdc63	ENSMUSG00000043036	-1.5318	0.00122709	0.0140095	10.9	37.4	0.156844	0.258344	0.607112	0.543777	0.971931	chr5	122138823	122142823	158.7	129
Ccdc167	ENSMUSG00000024018	-1.52426	0.00123026	0.0140369	7.6	27.5	-0.206478	0.264098	-0.781824	0.434318	0.971931	chr17	29715044	29719044	121.761	144
Lrrc61	ENSMUSG00000073096	-1.83281	0.00123186	0.0140464	6	30.7	-0.216348	0.267828	-0.807788	0.419212	0.971931	chr6	48552796	48556796	670.454	673
Vat1	ENSMUSG00000034993	1.94191	0.00123281	0.0140479	63.2	20.4	0.20444	0.266205	0.76798	0.442499	0.971931	chr11	101464230	101468230	356.98	246
Nfyc	ENSMUSG00000032897	-1.00248	0.00123353	0.0140479	332.1	691.6	0.0417206	0.276613	0.150827	0.880112	NA	chr4	120829572	120833572	83.8982	84
Ccdc88c	ENSMUSG00000021182	1.82542	0.00123845	0.0140952	33.1	10	0.176955	0.258503	0.68454	0.493634	0.971931	chr12	101027056	101031056	202.479	161
AU040320	ENSMUSG00000028830	1.3212	0.00124724	0.0141863	172.8	72.3	-0.246178	0.243056	-1.01285	0.311133	0.971931	chr4	126751544	126755544	457.979	510
Dnah6	ENSMUSG00000052861	-2.29005	0.00124945	0.0142027	0.1	1.9	-0.996298	0.272563	-3.6553	0.000256882	0.0538389	chr6	73219651	73223651	264.645	650
Igf2bp2	ENSMUSG00000033581	1.85949	0.00125731	0.0142831	117.5	30.9	0.229352	0.257173	0.891822	0.372488	0.971931	chr16	22161299	22165299	313.299	213
Megf9	ENSMUSG00000039270	2.19024	0.00126144	0.0143198	16.5	4.5	-0.172708	0.247891	-0.696712	0.485983	0.971931	chr4	70532995	70536995	587.924	603
Slfn10-ps	ENSMUSG00000072621	2.39522	0.0012621	0.0143198	5.5	0.3	0.332678	0.275982	1.20543	0.228036	NA	chr11	83038042	83042042	111.864	79
Nr1d2	ENSMUSG00000021775	-1.21156	0.0012652	0.014346	160.6	407.8	-0.194245	0.260831	-0.744717	0.456443	0.971931	chr14	18237127	18241127	763.105	798
Dpp3	ENSMUSG00000063904	1.23914	0.00126666	0.0143536	48.9	18.2	0.0147874	0.272708	0.0542242	0.956757	0.995102	chr19	4926287	4930287	317.818	258
Ckap4	ENSMUSG00000046841	1.46452	0.0012692	0.0143735	65.8	24	0.460031	0.248672	1.84995	0.0643209	0.802756	chr10	84532062	84536062	961.883	510
Pax6	ENSMUSG00000027168	1.80856	0.00127469	0.0144267	9.2	2.5	-0.0369412	0.285446	-0.129416	0.897029	NA	chr2	105666900	105670900	66.1016	78
Zfp553	ENSMUSG00000045598	1.81838	0.00127663	0.0144397	69.8	23.3	-0.107854	0.243796	-0.442394	0.658204	0.972431	chr7	127231061	127235061	548.307	529
Gm15446	ENSMUSG00000090015	-1.67845	0.00127751	0.0144408	17.9	81.2	-0.418751	0.256387	-1.63327	0.102411	0.887955	chr5	109921400	109925400	599.703	733
Zswim6	ENSMUSG00000032846	1.15893	0.00127979	0.0144576	33.4	14.3	-0.36867	0.246045	-1.49839	0.134033	0.935085	chr13	107888064	107892064	609.81	706
2010002M12Rik	ENSMUSG00000067297	-1.55804	0.00128239	0.014478	8.4	29.5	0.104682	0.263166	0.397779	0.690793	0.972431	chr19	34638743	34642743	186.062	157
1010001N08Rik	ENSMUSG00000097222	-1.1597	0.00128363	0.014483	104.4	256.5	-0.0936931	0.248287	-0.377358	0.705907	0.974839	chr18	11050567	11054567	1908.4	2177
NA	ENSMUSG00000097612	-2.63083	0.00129418	0.014593	0.2	3.2	0.0301476	0.281181	0.107218	0.914616	NA	chr1	106088068	106092068	71.1864	75
NA	ENSMUSG00000073427	-1.93595	0.00129562	0.0146003	6.5	53.3	0.123506	0.266336	0.463722	0.642847	0.971931	chr10	82352255	82356255	570.493	444
Thbs2	ENSMUSG00000023885	1.77721	0.0013052	0.0146992	8.4	2.7	-0.0497634	0.263848	-0.188606	0.850402	0.984959	chr17	14692235	14696235	176.485	173
Slc4a2	ENSMUSG00000028962	1.22575	0.00130618	0.0147012	178.8	77.4	0.0412129	0.250976	0.164211	0.869565	0.986783	chr5	24421837	24425837	1039.37	875
Zkscan17	ENSMUSG00000020472	1.39766	0.00130901	0.0147239	95.1	36.3	0.262661	0.269007	0.97641	0.328861	0.971931	chr11	59524751	59528751	118.22	93
Dnase1l2	ENSMUSG00000024136	-1.57437	0.00131212	0.0147499	30.2	118.7	-0.17786	0.261221	-0.680879	0.495948	0.971931	chr17	24441105	24445105	248.531	252
S100a10	ENSMUSG00000041959	2.30403	0.0013181	0.0148079	31.8	1.4	0.808038	0.260872	3.09745	0.00195196	0.176198	chr3	93553080	93557080	624.373	245
Zswim4	ENSMUSG00000035671	1.49913	0.00132044	0.0148251	161	63.4	0.0680609	0.255532	0.26635	0.78997	0.980127	chr8	84235055	84239055	662.405	537
Arhgef33	ENSMUSG00000054901	2.44914	0.00134709	0.015115	7.1	0.8	0.00516694	0.281121	0.0183798	0.985336	NA	chr17	80305407	80309407	63.5593	65
NA	ENSMUSG00000085612	-2.03425	0.0013508	0.0151393	7.3	65	-0.189378	0.273469	-0.692502	0.488622	0.971931	chr16	14309841	14313841	134.074	153
Gnas	ENSMUSG00000027523	1.7747	0.00135091	0.0151393	131.5	45.4	0.319692	0.279888	1.14222	0.253364	NA	chr2	174282320	174286320	81.3559	57
Foxk1	ENSMUSG00000056493	1.09737	0.00135291	0.0151524	173.5	81.8	0.264137	0.243326	1.08553	0.277687	0.971931	chr5	142399497	142403497	499.181	350
Iqsec2	ENSMUSG00000041115	1.53782	0.00135754	0.015195	127.2	46.1	-0.0628671	0.273002	-0.23028	0.817874	0.981104	chrX	152142268	152146268	229.841	223
Anp32b	ENSMUSG00000028333	1.94868	0.00135917	0.0152039	354.5	115.5	-0.265789	0.247135	-1.07548	0.282158	0.971931	chr4	46448902	46452902	497.596	562
Amelx	ENSMUSG00000031354	-2.54226	0.00137628	0.0153859	0.4	10.9	-0.216172	0.285483	-0.757215	0.448921	NA	chrX	169185200	169189200	31.7796	41
NA	ENSMUSG00000081583	1.88983	0.00137954	0.0154129	3438.7	1099	-0.0600436	0.281932	-0.212972	0.831349	NA	chrX	84061333	84065333	49.5762	55
Ehd3	ENSMUSG00000024065	2.00648	0.00138073	0.0154168	6.7	1.3	0.212811	0.259353	0.820547	0.411905	0.971931	chr17	73802134	73806134	157.332	121
Rhpn2	ENSMUSG00000030494	1.79836	0.00138662	0.015473	25.5	5.4	-0.115539	0.256851	-0.449829	0.652833	0.971931	chr7	35332170	35336170	316.312	297
Prcc	ENSMUSG00000004895	1.64259	0.00138828	0.0154822	179.3	60.5	-0.0338462	0.248266	-0.13633	0.89156	0.990253	chr3	87883608	87887608	610.11	553
LOC102632394	ENSMUSG00000097835	-1.81468	0.00139105	0.0155036	14.1	164	0.0798101	0.251117	0.317821	0.750621	0.977354	chr18	67772857	67776857	480.165	395
Spen	ENSMUSG00000040761	1.79003	0.00139337	0.0155104	370.5	131.9	-0.322119	0.253531	-1.27053	0.203894	0.971931	chr4	141536597	141540597	731.099	874
Gm15708	ENSMUSG00000086894	-1.3517	0.00139265	0.0155104	24.2	76.2	0.232744	0.280026	0.831154	0.405887	NA	chr5	144275061	144279061	87.7118	71
NA	ENSMUSG00000085788	-2.50933	0.00140203	0.0155879	0.1	3.8	-0.345107	0.265132	-1.30164	0.193038	0.971931	chr13	21438471	21442471	168.277	218
4930525G20Rik	ENSMUSG00000097276	-2.4343	0.0014018	0.0155879	0.3	9.7	-0.212291	0.280816	-0.755979	0.449662	NA	chr13	67828985	67832985	57.2033	73
Xpnpep1	ENSMUSG00000025027	1.11888	0.00140822	0.0156282	190.2	90	-0.248817	0.252437	-0.985662	0.324299	0.971931	chr19	53038214	53042214	803.535	894
Psmd5	ENSMUSG00000026869	2.04507	0.00140661	0.0156282	15.2	3.9	-0.158955	0.269278	-0.5903	0.55499	0.971931	chr2	34872968	34876968	140.915	158
Wdr47	ENSMUSG00000040389	1.60017	0.00140756	0.0156282	30.2	10.1	0.17308	0.26153	0.661797	0.508102	0.971931	chr3	108589279	108593279	338.905	242
NA	ENSMUSG00000098651	1.86377	0.00141015	0.0156401	358.4	87.5	-0.109449	0.256375	-0.42691	0.669445	0.972431	chr2	91942930	91946930	206.584	214
NA	ENSMUSG00000041481	2.17028	0.00141624	0.0156981	8.1	1.2	-0.12709	0.283698	-0.447976	0.654171	NA	chr12	104234245	104238245	47.0339	58
Nmnat1	ENSMUSG00000028992	-1.32648	0.00141816	0.0157003	67.2	207.7	-0.103743	0.254861	-0.407057	0.683966	0.972431	chr4	149483202	149487202	892.816	860
NA	ENSMUSG00000092888	2.61132	0.00141755	0.0157003	14.6	0.5	0.0413103	0.284966	0.144966	0.884738	NA	chr6	48287228	48291228	59.7457	62
NA	ENSMUSG00000086448	-2.25705	0.00142334	0.0157441	0.4	5.3	-0.726009	0.259004	-2.80308	0.0050617	0.277997	chr13	24935401	24939401	510.421	847
Gm20748	ENSMUSG00000098098	-2.05758	0.0014247	0.0157441	12.2	120.4	0.0133775	0.253529	0.0527649	0.957919	0.995102	chr18	61637542	61641542	766.474	618
NA	ENSMUSG00000064609	-2.62438	0.0014242	0.0157441	0.8	61.5	0.0548353	0.280979	0.195158	0.84527	NA	chr10	9850149	9854149	62.2881	63
Fancg	ENSMUSG00000028453	2.31729	0.001427	0.0157505	8.5	1.5	-0.133197	0.255322	-0.521685	0.60189	0.971931	chr4	43008506	43012506	188.798	201
Mocos	ENSMUSG00000039616	1.36027	0.00143938	0.0158718	119.4	46.6	-0.0943232	0.254671	-0.370373	0.711105	0.974839	chr18	24651691	24655691	328.362	305
Aspscr1	ENSMUSG00000025142	1.28394	0.00143973	0.0158718	212	89.4	-0.0655956	0.244425	-0.268367	0.788417	0.980041	chr11	120670973	120674973	412.022	393
Per2	ENSMUSG00000055866	1.81425	0.00144622	0.0159337	292.9	95.3	-0.154201	0.256985	-0.600037	0.548481	0.971931	chr1	91457324	91461324	548.307	552
Rcl1	ENSMUSG00000024785	1.80301	0.00145121	0.0159791	69.4	20.8	-0.22166	0.268182	-0.826529	0.408504	0.971931	chr19	29099375	29103375	271.124	284
Wdr66	ENSMUSG00000029442	2.22779	0.00145368	0.0159966	19.2	7.2	-0.292286	0.276339	-1.05771	0.290189	NA	chr5	123250102	123254102	66.1016	96
NA	ENSMUSG00000081809	-2.39672	0.00145574	0.0160096	1	21.6	0.1977	0.277537	0.712337	0.476256	NA	chr16	3925606	3929606	80.0847	65
NA	ENSMUSG00000085614	-2.34932	0.00146633	0.0160971	0.9	21.4	-0.394337	0.257972	-1.5286	0.126363	0.929452	chr4	11964565	11968565	587.911	703
Limch1	ENSMUSG00000037736	1.51106	0.0014658	0.0160971	2626.9	1021.1	-0.117116	0.248178	-0.471903	0.636996	0.971931	chr5	66743827	66747827	1182.56	1181
Glt25d1	ENSMUSG00000034807	1.06567	0.00146596	0.0160971	100	46.6	-0.0409317	0.247412	-0.165439	0.868598	0.986783	chr8	71608998	71612998	410.438	375
NA	ENSMUSG00000082420	1.22084	0.00147019	0.0161255	547.2	234.9	0.0409823	0.272078	0.150627	0.88027	0.989715	chr5	66888366	66892366	325.349	255
NA	ENSMUSG00000097106	-2.34729	0.00147069	0.0161255	1.5	85.9	-0.0389109	0.27528	-0.14135	0.887593	NA	chr8	35131532	35135532	78.8135	83
Rasl10b	ENSMUSG00000020684	1.92116	0.0014746	0.0161587	86.8	25.5	-0.0251611	0.260744	-0.0964977	0.923125	0.992629	chr11	83407137	83411137	605.356	531
Sh3bp1	ENSMUSG00000022436	2.02994	0.00148107	0.0162198	29.8	4.7	-0.0908147	0.257666	-0.352451	0.7245	0.974849	chr15	78897768	78901768	192.903	198
Mir6236	ENSMUSG00000098973	2.05978	0.00148564	0.0162601	390880	102542	-0.478743	0.28132	-1.70178	0.0887975	NA	chr9	110279287	110283287	45.7627	81
Camsap2	ENSMUSG00000041570	1.00159	0.00148655	0.0162603	174	86.6	-0.228014	0.256378	-0.889367	0.373806	0.971931	chr1	136344104	136348104	431.039	464
Mob3a	ENSMUSG00000003348	2.23994	0.00149063	0.0162953	10.2	1.1	-0.0441858	0.243742	-0.181281	0.856147	0.985258	chr10	80699977	80703977	464.318	431
Tgif1	ENSMUSG00000047407	2.36736	0.00149985	0.0163666	6.1	3.2	0.161936	0.26443	0.612397	0.540275	0.971931	chr17	70851546	70855546	373.549	265
NA	ENSMUSG00000101210	1.27269	0.00149948	0.0163666	59.9	22.2	-0.344102	0.270306	-1.27301	0.203015	0.971931	chr6	86492649	86496649	149.123	197
NA	ENSMUSG00000073198	1.63092	0.00149895	0.0163666	151.9	50.9	0.173364	0.223715	0.774935	0.438378	NA	chr12	18214542	18218542	8.8983	4
Clasrp	ENSMUSG00000061028	1.40007	0.00150184	0.0163786	219	88.4	-0.415702	0.265143	-1.56784	0.116918	0.914984	chr7	19602486	19606486	154.596	218
NA	ENSMUSG00000082185	1.58012	0.00150319	0.0163836	35.5	10.5	0.0612326	0.283163	0.216245	0.828797	NA	chr3	98819038	98823038	62.2881	62
Decr1	ENSMUSG00000028223	-1.48566	0.00150849	0.0164029	18.7	65.4	-0.778155	0.246582	-3.15577	0.00160074	0.158682	chr4	15943507	15947507	520.529	950
Ahdc1	ENSMUSG00000037692	1.6338	0.00150856	0.0164029	296.3	105	-0.152508	0.244723	-0.623187	0.533162	0.971931	chr4	133009260	133013260	803.535	808
Serf2	ENSMUSG00000074884	0.950855	0.001507	0.0164029	132.3	66.8	0.0897722	0.250023	0.359057	0.719553	0.974849	chr2	121447195	121451195	1068.01	860
Nr2e1	ENSMUSG00000019803	2.10803	0.00150733	0.0164029	7.5	1.9	0.0557866	0.283724	0.196623	0.844123	NA	chr10	42581632	42585632	68.644	71
Cdc42bpb	ENSMUSG00000021279	1.52426	0.00151223	0.0164116	636.7	230.9	-0.18755	0.248744	-0.753991	0.450854	0.971931	chr12	111375718	111379718	707.515	692
Uba7	ENSMUSG00000032596	1.33081	0.00151295	0.0164116	43.7	16	0.1944	0.2456	0.791532	0.428634	0.971931	chr9	107973505	107977505	591.094	440
Kdm7a	ENSMUSG00000042599	-0.764646	0.00151271	0.0164116	42.5	73.4	-0.179964	0.248773	-0.723406	0.469431	0.971931	chr6	39204789	39208789	756.367	798
NA	ENSMUSG00000093149	1.40376	0.00151226	0.0164116	2412.7	899.4	0.0400596	0.284465	0.140824	0.888009	NA	chr16	64916305	64920305	62.2881	65
Mccc1	ENSMUSG00000027709	-1.10475	0.00151931	0.0164564	87.5	209.1	-0.589082	0.261163	-2.2556	0.0240954	0.567642	chr3	35998678	36002678	286.831	450
Psmc3	ENSMUSG00000002102	1.10096	0.00151932	0.0164564	298.1	139.1	-0.293575	0.263741	-1.11312	0.265658	0.971931	chr2	91052009	91056009	326.855	365
NA	ENSMUSG00000043192	1.15557	0.00151979	0.0164564	339.6	155.6	-0.252419	0.285374	-0.884519	0.376416	NA	chr8	5637580	5641580	43.2203	65
2310030G06Rik	ENSMUSG00000032062	1.77787	0.00152152	0.0164654	79.8	24	0.249927	0.270377	0.924362	0.355298	0.971931	chr9	50744536	50748536	657.651	432
Dcakd	ENSMUSG00000020935	-1.52658	0.00152279	0.0164694	37	145.1	-0.0364258	0.26143	-0.139333	0.889187	0.990253	chr11	103026333	103030333	1133.71	1015
Zfyve21	ENSMUSG00000021286	-1.69359	0.00152768	0.0164877	4.5	38.3	-0.581998	0.252351	-2.30631	0.0210935	0.534193	chr12	111812170	111816170	402.514	609
Cabin1	ENSMUSG00000020196	1.62191	0.001529	0.0164877	367.9	133.4	-0.447669	0.267682	-1.67239	0.0944479	0.872089	chr10	75762341	75766341	253.049	332
Mark4	ENSMUSG00000030397	1.81789	0.00152685	0.0164877	223.8	71.5	-0.335426	0.244545	-1.37164	0.170177	0.962354	chr7	19456821	19460821	358.143	436
Aars	ENSMUSG00000031960	1.41018	0.00152852	0.0164877	122.3	47.6	0.0756246	0.239944	0.315176	0.752628	0.977354	chr8	111031144	111035144	412.022	346
Usp4	ENSMUSG00000032612	0.76351	0.00152547	0.0164877	160.2	93.7	-0.00427842	0.26383	-0.0162166	0.987062	0.998671	chr9	108345853	108349853	456.394	389
NA	ENSMUSG00000059571	-1.938	0.00153417	0.0165337	42.2	357.7	-0.521291	0.27541	-1.89278	0.0583866	0.779942	chr9	65295919	65299919	263.593	378
Zfp36	ENSMUSG00000044786	1.74789	0.00153515	0.0165345	545.3	175.9	-0.102666	0.247626	-0.414602	0.678433	0.972431	chr7	28378253	28382253	2007.33	2279
D630024D03Rik	ENSMUSG00000085772	-2.14354	0.00153811	0.0165469	3.1	63.4	0.453561	0.255277	1.77675	0.0756102	0.83697	chr11	31822524	31826524	713.116	406
Lrrc8b	ENSMUSG00000070639	-2.29936	0.0015374	0.0165469	0.4	1.4	0.0004471	0.266048	0.00168052	0.998659	0.999653	chr5	105413775	105417775	283.174	236
Slc6a9	ENSMUSG00000028542	1.8673	0.00154141	0.0165727	8.4	2.1	0.0537369	0.250474	0.214541	0.830125	0.982981	chr4	117832506	117836506	217.528	201
Me3	ENSMUSG00000030621	-1.1731	0.00154661	0.0166138	65	165.8	-0.253366	0.25044	-1.01168	0.31169	0.971931	chr7	89630392	89634392	1104.03	1459
Sorl1	ENSMUSG00000049313	0.95419	0.00154706	0.0166138	70	36.3	0.0521314	0.267128	0.195155	0.845271	0.984959	chr9	42122297	42126297	243.522	214
Tmem43	ENSMUSG00000030095	1.72824	0.00154934	0.0166285	49.8	17.3	-0.0179335	0.248227	-0.0722466	0.942406	0.994121	chr6	91471703	91475703	705.83	594
Setd5	ENSMUSG00000034269	1.01516	0.00155235	0.0166511	697.2	351.6	-0.0501871	0.24184	-0.207522	0.835602	0.983814	chr6	113075365	113079365	1078.12	994
Tuba8	ENSMUSG00000030137	-1.19462	0.00155759	0.0166975	115.3	294.2	-0.453319	0.252743	-1.79359	0.0728783	0.828468	chr6	121208696	121212696	656.978	871
NA	ENSMUSG00000085589	-2.30336	0.00156194	0.0167343	0.6	8.5	-0.497802	0.254861	-1.95323	0.0507926	0.747429	chr6	86478830	86482830	297.924	431
NA	ENSMUSG00000092470	-2.36467	0.00156434	0.0167432	0.1	7.6	-0.704707	0.24761	-2.84604	0.00442666	0.262524	chr16	17889671	17893671	461.569	741
Npas2	ENSMUSG00000026077	-1.75618	0.0015646	0.0167432	10.3	57.9	0.00940885	0.257955	0.0364747	0.970904	0.996544	chr1	39191731	39195731	502.351	428
Ano8	ENSMUSG00000034863	1.13545	0.00156919	0.0167825	49.2	21.8	-0.418673	0.260733	-1.60575	0.108328	0.902689	chr8	71483963	71487963	262.087	331
Cdipt	ENSMUSG00000030682	1.68754	0.00157031	0.0167846	24.8	5.5	-0.202465	0.259113	-0.781379	0.434579	0.971931	chr7	126973914	126977914	756.367	747
Phf12	ENSMUSG00000037791	1.31085	0.0015817	0.0168964	249.3	107.8	-0.403752	0.231339	-1.74528	0.0809355	0.854826	chr11	77980754	77984754	744.575	960
NA	ENSMUSG00000099893	-1.71395	0.00158551	0.0169273	49.6	271.9	-0.00665867	0.257264	-0.0258827	0.979351	0.997464	chr10	43152216	43156216	158.7	153
Acot2	ENSMUSG00000021226	-2.14067	0.0015883	0.0169411	3.6	27.8	-0.823902	0.241692	-3.40889	0.00065227	0.0943927	chr12	83985861	83989861	599.703	1143
Cyb5r2	ENSMUSG00000048065	-1.81466	0.00158866	0.0169411	20.4	80.1	0.158695	0.263349	0.602603	0.546773	0.971931	chr7	107756032	107760032	134.074	111
NA	ENSMUSG00000083817	-1.85063	0.00159025	0.0169481	2.2	26.1	0.220055	0.282553	0.778809	0.436092	NA	chr2	177226963	177230963	58.4745	47
Strn	ENSMUSG00000024077	0.976104	0.00159265	0.0169639	103.5	52.8	-0.288097	0.26034	-1.10662	0.268459	0.971931	chr17	78735196	78739196	565.739	642
Kirrel3	ENSMUSG00000032036	-2.05234	0.00159544	0.0169836	1.5	15.5	0.240703	0.274058	0.878292	0.379785	NA	chr9	34483894	34487894	105.508	86
Ncor2	ENSMUSG00000029478	1.72025	0.00160637	0.01709	762.2	268.8	-0.0814663	0.241179	-0.337783	0.735526	0.97486	chr5	125177219	125181219	783.32	742
NA	ENSMUSG00000097773	-2.01696	0.0016186	0.0172101	1.5	9.8	-0.351956	0.258884	-1.35951	0.173984	0.968087	chr8	120587531	120591531	319.324	377
Icosl	ENSMUSG00000000732	-2.08449	0.00162114	0.0172171	0.9	12.7	-0.447373	0.264019	-1.69447	0.0901761	0.869435	chr10	78067302	78071302	108.08	159
Rad52	ENSMUSG00000030166	1.55919	0.0016207	0.0172171	206.6	77	0.209675	0.271559	0.772116	0.440046	0.971931	chr6	119900698	119904698	415.724	274
Wnt8b	ENSMUSG00000036961	-2.0673	0.00162209	0.0172172	0.8	10.4	0.0499494	0.285533	0.174934	0.861132	NA	chr19	44491472	44495472	55.9322	56
Map1s	ENSMUSG00000019261	1.97794	0.00162682	0.0172574	86.3	22.1	-0.0122622	0.266723	-0.0459734	0.963331	0.995679	chr8	70903932	70907932	236.682	223
Slc35e4	ENSMUSG00000048807	2.00985	0.00162831	0.0172631	17.2	3.6	0.196543	0.251004	0.783028	0.433611	0.971931	chr11	3912664	3916664	486.503	355
NA	ENSMUSG00000082286	1.19865	0.0016309	0.0172805	408.6	183.8	0.138862	0.241464	0.575085	0.565234	0.971931	chr11	3123904	3127904	573.662	476
Sycp3	ENSMUSG00000020059	-1.86346	0.00163356	0.0172987	13.6	176.4	0.240488	0.271173	0.886841	0.375165	NA	chr10	88457569	88461569	100.424	81
Nab2	ENSMUSG00000025402	2.11277	0.0016391	0.0173372	36.7	12.7	0.307111	0.25726	1.19378	0.232565	0.971931	chr10	127666568	127670568	887.763	539
Myo18b	ENSMUSG00000072720	1.8575	0.00163879	0.0173372	6605.3	2125	-0.10376	0.24986	-0.415273	0.677942	0.972431	chr5	112894362	112898362	1095.43	1281
Pabpn1	ENSMUSG00000022194	1.35571	0.00165038	0.0174465	357.1	148.7	-0.295593	0.251902	-1.17344	0.240618	0.971931	chr14	54890500	54894500	314.805	354
Pamr1	ENSMUSG00000027188	2.19774	0.00165331	0.0174673	5.3	0.4	0.374111	0.269327	1.38906	0.164815	0.95809	chr2	102548012	102552012	123.305	87
Mmp23	ENSMUSG00000029061	1.56032	0.00165837	0.0175073	72.8	21.1	0.638397	0.263469	2.42304	0.0153912	0.461112	chr4	155651384	155655384	533.211	241
Rab3gap2	ENSMUSG00000039318	1.0468	0.00165901	0.0175073	95.9	47.5	0.199734	0.268874	0.742855	0.45757	0.971931	chr1	185202117	185206117	412.711	276
Alpk3	ENSMUSG00000038763	1.74799	0.00166368	0.0175464	4182.6	1494.7	-0.203462	0.249092	-0.816817	0.414033	0.971931	chr7	81055600	81059600	1167.4	1238
Tmem143	ENSMUSG00000002781	-1.10596	0.00166824	0.0175843	39	88.9	-0.208207	0.253948	-0.81988	0.412284	0.971931	chr7	45894941	45898941	451.64	486
Rai1	ENSMUSG00000062115	1.67067	0.00167366	0.0176314	598.1	193	-0.0270877	0.24356	-0.111216	0.911445	0.990886	chr11	60103013	60107013	1046.11	935
Scn4b	ENSMUSG00000046480	-2.0037	0.00167503	0.0176356	1	12.7	-1.0431	0.251103	-4.15406	3.26631e-05	0.0126719	chr9	45136395	45140395	367.234	846
NA	ENSMUSG00000078901	-1.75234	0.00168251	0.017694	3.1	33.5	-0.315279	0.279633	-1.12747	0.259543	0.971931	chr2	175273125	175277125	99.8715	132
ND3	ENSMUSG00000064360	-2.26676	0.00168638	0.0177245	2.9	68.2	NA	NA	NA	NA	NA	chrMT	7459	11459	0.127119	0.1
Zmiz2	ENSMUSG00000041164	1.50074	0.00169052	0.0177475	330.6	131.1	-0.213681	0.252171	-0.847366	0.396791	0.971931	chr11	6387074	6391074	356.558	389
Slc9a4	ENSMUSG00000026065	-2.2576	0.00168996	0.0177475	0.2	7.3	-0.0783634	0.271075	-0.289084	0.772517	NA	chr1	40578081	40582081	83.8982	94
Myd88	ENSMUSG00000032508	2.01585	0.0016947	0.0177812	18.7	5.3	-0.245744	0.254483	-0.965659	0.334215	0.971931	chr9	119339411	119343411	870.917	963
Tmem106b	ENSMUSG00000029571	-1.45198	0.00170004	0.017819	72.7	247.6	-0.137941	0.263858	-0.522786	0.601123	0.971931	chr6	13067759	13071759	926.507	906
Dkk2	ENSMUSG00000028031	1.95086	0.00170025	0.017819	25.1	7.4	0.194491	0.279411	0.696074	0.486383	NA	chr3	132083292	132087292	78.8135	68
Ppp1r3a	ENSMUSG00000042717	-0.865183	0.00170636	0.0178609	219.9	413.9	-0.124829	0.269995	-0.46234	0.643838	0.971931	chr6	14753274	14757274	1346.34	1544
Zfhx3	ENSMUSG00000038872	1.66985	0.00170703	0.0178609	119.5	43.6	-0.0957242	0.284748	-0.336172	0.736741	NA	chr8	107940644	107944644	27.9661	35
Gm10619	ENSMUSG00000074067	-2.22866	0.00170797	0.0178609	0.7	5	0.17289	0.284517	0.607661	0.543413	NA	chr7	73814503	73818503	71.1864	62
NA	ENSMUSG00000089670	1.35926	0.00170816	0.0178609	1487.1	602.4	-0.110192	0.275131	-0.400508	0.688783	NA	chr1	55125297	55129297	72.4576	86
Furin	ENSMUSG00000030530	1.83838	0.00171357	0.017895	171.1	58.1	0.220872	0.2607	0.847228	0.396868	0.971931	chr7	80403436	80407436	353.968	240
Crocc	ENSMUSG00000040860	1.97481	0.00171431	0.017895	31.8	10.2	-0.354745	0.2688	-1.31974	0.186923	0.971931	chr4	141058550	141062550	262.087	312
NA	ENSMUSG00000063739	-1.86993	0.00171436	0.017895	6.6	64.2	0.35257	0.285419	1.23527	0.21673	NA	chr5	137991424	137995424	43.2203	28
NA	ENSMUSG00000083811	-2.23463	0.00172143	0.0179585	1.5	71.5	-0.221953	0.281474	-0.788539	0.430381	NA	chr4	149498633	149502633	68.644	95
Inha	ENSMUSG00000032968	-0.941214	0.00172245	0.0179589	127.2	257.7	-0.249411	0.247172	-1.00906	0.312947	0.971931	chr1	75505077	75509077	714.253	800
Tigd2	ENSMUSG00000049232	-1.56431	0.00172549	0.0179599	10.4	44.9	-0.241786	0.251479	-0.961458	0.336322	0.971931	chr6	59206870	59210870	386.667	427
Med25	ENSMUSG00000002968	1.84837	0.00172483	0.0179599	302	103.2	-0.105049	0.253285	-0.414746	0.678328	0.972431	chr7	44890712	44894712	375.574	375
Dos	ENSMUSG00000035640	2.04975	0.00173131	0.0180101	39.8	7.8	-0.229111	0.250436	-0.914846	0.360273	0.971931	chr10	80138835	80142835	635.079	649
Casc1	ENSMUSG00000043541	-1.80959	0.00173304	0.0180179	1	5.7	-0.144311	0.261078	-0.552749	0.580435	0.971931	chr6	145209005	145213005	710.884	669
Gm10069	ENSMUSG00000059659	-1.45286	0.00174507	0.0181326	9.5	28.5	-0.801738	0.262468	-3.05461	0.00225351	0.193823	chr6	128436757	128440757	491.891	886
Rabac1	ENSMUSG00000003380	-1.79984	0.00174873	0.0181604	3	26.2	-0.365511	0.254014	-1.43894	0.150167	0.945163	chr7	24970754	24974754	394.591	483
Cers2	ENSMUSG00000015714	1.03523	0.0017531	0.0181954	335.4	166.3	0.245608	0.243832	1.00728	0.313799	0.971931	chr3	95312791	95316791	1302.16	914
Tinagl1	ENSMUSG00000028776	1.88096	0.00175752	0.0182309	43.6	14.7	-0.0885884	0.265865	-0.333209	0.738977	0.974955	chr4	130173122	130177122	304.262	277
Btf3l4	ENSMUSG00000028568	-1.39016	0.001765	0.0182951	28.8	91.8	-0.176119	0.255093	-0.690412	0.489935	0.971931	chr4	108831614	108835614	1281.82	1575
Adam10	ENSMUSG00000054693	1.03088	0.00176572	0.0182951	45.4	22	-0.187745	0.242778	-0.773318	0.439334	0.971931	chr9	70676997	70680997	465.902	496
3300005D01Rik	ENSMUSG00000096965	2.3898	0.00177145	0.0183338	7.7	0.5	0.482723	0.261967	1.84269	0.0653745	0.806896	chr17	5796657	5800657	243.522	144
NA	ENSMUSG00000094463	1.82702	0.00177058	0.0183338	39.9	11.9	0.256019	0.284688	0.899297	0.368494	NA	chr13	89576419	89580419	59.7457	47
Zfp335	ENSMUSG00000039834	1.6927	0.00177253	0.0183346	619.4	225.4	-0.0669116	0.247829	-0.269991	0.787167	0.98003	chr2	164909757	164913757	1174.14	1093
NA	ENSMUSG00000086328	-2.08975	0.00177673	0.0183572	1.8	19.7	-0.40367	0.261711	-1.54243	0.12297	0.924635	chr2	116065444	116069444	648.555	789
Ap3b1	ENSMUSG00000021686	1.34667	0.00177624	0.0183572	157	66.4	-0.0341023	0.263607	-0.129368	0.897067	0.990253	chr13	94356960	94360960	375.055	322
Kmt2a	ENSMUSG00000002028	1.28676	0.00178106	0.0183915	1349.8	585.3	0.052505	0.240474	0.21834	0.827164	0.982981	chr9	44879296	44883296	758.052	613
E2f3	ENSMUSG00000016477	1.41339	0.0017858	0.0184197	54.5	21	-0.067053	0.254101	-0.263883	0.79187	0.980208	chr13	29984063	29988063	774.897	674
Mef2c	ENSMUSG00000005583	1.01046	0.00178567	0.0184197	99	49.3	-0.0154617	0.265463	-0.0582443	0.953554	0.994507	chr13	83502034	83506034	203.847	191
Stx3	ENSMUSG00000041488	0.997869	0.00178759	0.0184277	102.2	51.3	-0.177482	0.276035	-0.64297	0.520244	0.971931	chr19	11817403	11821403	272.63	273
Chst12	ENSMUSG00000036599	2.4962	0.0017952	0.0184957	4	0.8	0.370152	0.253263	1.46153	0.143869	0.942087	chr5	140503550	140507550	279.093	185
2810055G20Rik	ENSMUSG00000090386	1.47263	0.00180865	0.0186133	1243.5	495	0.158441	0.278875	0.568143	0.569938	NA	chr16	77234317	77238317	78.8135	70
Enthd2	ENSMUSG00000025377	1.68247	0.00181018	0.0186186	115.6	41.7	-0.208038	0.23952	-0.86856	0.385088	0.971931	chr11	120096731	120100731	497.596	542
Dact3	ENSMUSG00000078794	1.80454	0.0018121	0.0186278	71.9	18.5	0.0812247	0.247076	0.328744	0.742349	0.97618	chr7	16873317	16877317	540.383	439
NA	ENSMUSG00000101335	-2.20937	0.00181732	0.018671	0.6	16.2	0.185441	0.280491	0.661133	0.508527	NA	chr9	88441652	88445652	97.8813	80
Tmed8	ENSMUSG00000034111	-1.26339	0.00181877	0.0186753	5	11.8	0.0349492	0.264749	0.132009	0.894978	0.990253	chr12	87198454	87202454	183.326	166
Zik1	ENSMUSG00000030393	-2.20495	0.00182302	0.0187084	0.4	5.5	0.00676529	0.265449	0.0254862	0.979667	0.997464	chr7	10493394	10497394	143.651	133
Pla2g4e	ENSMUSG00000050211	-1.70814	0.00182735	0.0187319	5	29.2	-0.765287	0.266632	-2.87019	0.00410219	0.254889	chr2	120243335	120247335	90.2948	191
Ifit1	ENSMUSG00000034459	-1.32469	0.00182637	0.0187319	19.2	54.1	0.175027	0.261045	0.670488	0.502546	0.971931	chr19	34638871	34642871	201.111	160
Gga1	ENSMUSG00000033128	1.4322	0.00183245	0.0187631	263	99.1	-0.166153	0.263348	-0.630926	0.528089	0.971931	chr15	78875190	78879190	739.521	705
NA	ENSMUSG00000089313	-2.40039	0.00183454	0.0187695	3.7	89.9	-0.387335	0.260698	-1.48576	0.137343	0.937994	chr10	128347241	128351241	240.999	297
Gramd1a	ENSMUSG00000001248	1.75936	0.00183525	0.0187695	632.1	199.5	-0.238918	0.245218	-0.97431	0.329903	0.971931	chr7	31153896	31157896	633.394	652
Zswim8	ENSMUSG00000021819	1.14436	0.00183616	0.0187695	565.7	265.7	-0.154656	0.253752	-0.609478	0.542208	0.971931	chr14	20705552	20709552	372.405	386
Rfxank	ENSMUSG00000036120	1.4428	0.00183814	0.0187779	86.4	31.1	-0.104477	0.252765	-0.413337	0.67936	0.972431	chr8	70137154	70141154	440.547	431
Nmnat3	ENSMUSG00000032456	-1.56516	0.00183904	0.0187779	24.8	111.4	0.117693	0.284593	0.413549	0.679204	NA	chr9	98285435	98289435	82.627	79
NA	ENSMUSG00000030068	-1.64756	0.00184141	0.0187917	6	29	-0.168336	0.255237	-0.659529	0.509556	0.971931	chr6	99664797	99668797	380.328	387
Ahi1	ENSMUSG00000019986	1.16848	0.00184338	0.0188013	98.6	43.3	-0.165561	0.270595	-0.611841	0.540643	0.971931	chr10	20950547	20954547	206.584	224
Pcgf2	ENSMUSG00000018537	1.92419	0.00184444	0.0188016	387.6	125.1	-0.220438	0.254865	-0.864921	0.387082	0.971931	chr11	97698497	97702497	325.349	337
Usp20	ENSMUSG00000026854	1.41651	0.00184765	0.0188238	398.5	158.2	-0.0916834	0.260677	-0.351712	0.725054	0.974849	chr2	30980279	30984279	344.93	318
Klc2	ENSMUSG00000024862	1.19648	0.00185111	0.0188485	103.1	45.8	0.16542	0.254839	0.649116	0.516263	0.971931	chr19	5116560	5120560	369.03	268
Ttc16	ENSMUSG00000039021	2.1249	0.00185458	0.0188628	10.4	2.6	-0.0768711	0.262893	-0.292404	0.769978	0.978372	chr2	32773633	32777633	320.83	289
Bhlhe41	ENSMUSG00000030256	0.772562	0.00185402	0.0188628	116.8	67.1	-0.0571155	0.241333	-0.236667	0.812915	0.981104	chr6	145863558	145867558	1271.79	1428
Hmg20b	ENSMUSG00000020232	1.39413	0.00186843	0.0189931	488.5	190.2	-0.330761	0.257011	-1.28696	0.19811	0.971931	chr10	81348480	81352480	380.328	459
Spats2	ENSMUSG00000051934	1.7516	0.00187099	0.0190085	36.8	7	0.075501	0.257278	0.29346	0.76917	0.978322	chr15	99123916	99127916	210.688	187
Hdac9	ENSMUSG00000004698	1.2138	0.00187263	0.0190146	229	102.1	0.444282	0.28531	1.55719	0.119425	NA	chr12	34915095	34919095	50.8474	30
Spry4	ENSMUSG00000024427	1.57162	0.00188079	0.0190868	13.1	3.9	0.497392	0.242215	2.05351	0.0400228	0.704883	chr18	38599415	38603415	567.323	323
Map3k14	ENSMUSG00000020941	1.84251	0.00188416	0.0190999	99.2	33.7	0.0975432	0.248023	0.393283	0.694111	0.973371	chr11	103265472	103269472	684.591	553
Pelp1	ENSMUSG00000018921	1.62322	0.00188341	0.0190999	127.1	47.7	0.0770526	0.261869	0.294241	0.768574	0.978322	chr11	70408031	70412031	176.485	155
NA	ENSMUSG00000042360	2.49547	0.00188693	0.0191173	4.7	2.7	0.515679	0.284731	1.81111	0.0701241	NA	chr9	3197799	3201799	61.0169	33
Lactb2	ENSMUSG00000025937	-1.564	0.00188876	0.0191252	35	150.9	-0.223632	0.262153	-0.853061	0.393626	0.971931	chr1	13658546	13662546	567.323	610
Arf3	ENSMUSG00000051853	1.30034	0.00189722	0.0192003	130.6	55	0.478804	0.256538	1.86641	0.0619843	0.794578	chr15	98761214	98765214	276.357	164
Zfp961	ENSMUSG00000052446	-1.78869	0.00189945	0.0192123	10.9	78.6	-0.405943	0.25858	-1.56989	0.11644	0.91398	chr8	71949038	71953038	373.99	491
NA	ENSMUSG00000085842	-2.15155	0.00190301	0.0192375	0.5	10.9	0.102133	0.27687	0.368883	0.712215	NA	chr1	61849540	61853540	76.2711	71
Col5a3	ENSMUSG00000004098	2.07102	0.0019051	0.0192481	22.2	5.4	-0.233201	0.27002	-0.863645	0.387783	0.971931	chr9	20813067	20817067	83.8982	113
LOC102635040	ENSMUSG00000087386	-2.46977	0.001907	0.0192488	0.2	7	-0.526443	0.256346	-2.05365	0.04001	0.704883	chr5	122046382	122050382	142.283	225
Ube2t	ENSMUSG00000026429	-1.87671	0.00190834	0.0192488	5.6	38.3	-0.195905	0.266453	-0.735233	0.462198	0.971931	chr1	134960565	134964565	199.743	223
Atp2a2	ENSMUSG00000029467	-1.01442	0.00190742	0.0192488	2142.5	4552.2	-0.177213	0.254713	-0.695734	0.486596	0.971931	chr5	122500225	122504225	950.091	990
NA	ENSMUSG00000086600	-2.26567	0.00190939	0.0192488	0.9	49.1	0.0598156	0.250496	0.238788	0.81127	0.981104	chr18	50051844	50055844	764.79	593
Rasa3	ENSMUSG00000031453	1.37111	0.00191286	0.0192731	82.9	32.6	0.175938	0.233518	0.753425	0.451195	0.971931	chr8	13675603	13679603	592.679	457
Map7d1	ENSMUSG00000028849	1.74136	0.00192275	0.0193622	2299.9	865.7	-0.239014	0.244046	-0.979384	0.32739	0.971931	chr4	126254343	126258343	1243.11	1604
Sowahc	ENSMUSG00000098188	1.87827	0.001929	0.0194143	16.3	5	-0.154083	0.253503	-0.607814	0.543311	0.971931	chr10	59219953	59223953	426.285	427
Noxred1	ENSMUSG00000072919	-2.2368	0.00193941	0.0195084	3	98	0.255638	0.27297	0.936506	0.349012	0.971931	chr12	87236732	87240732	139.546	101
Dmwd	ENSMUSG00000030410	1.64831	0.00194331	0.0195336	833.1	299.9	-0.281438	0.246659	-1.141	0.25387	0.971931	chr7	19074227	19078227	322.337	355
Ccnt2	ENSMUSG00000026349	1.37909	0.00194424	0.0195336	741.1	315.1	-0.109995	0.263413	-0.417576	0.676257	0.972431	chr1	127772164	127776164	1036	976
Stab2	ENSMUSG00000035459	-2.01486	0.00194512	0.0195336	0.4	2.9	0.381404	0.284622	1.34003	0.180234	NA	chr10	87006025	87010025	68.644	46
Slc25a42	ENSMUSG00000002346	-0.957669	0.00194761	0.019537	252	521	-0.540703	0.244253	-2.2137	0.0268491	0.59558	chr8	70210305	70214305	871.754	1530
Xpo6	ENSMUSG00000000131	1.22597	0.00194671	0.019537	1443.1	635.4	-0.00334317	0.271501	-0.0123136	0.990175	0.999297	chr7	126198501	126202501	320.83	264
Gp5	ENSMUSG00000047953	2.49172	0.00195104	0.0195607	1.8	0.2	0.0484668	0.269016	0.180163	0.857024	0.985519	chr16	30308779	30312779	124.497	114
Nde1	ENSMUSG00000022678	1.45289	0.00195462	0.0195859	58.1	20.2	-0.208782	0.262253	-0.79611	0.425968	0.971931	chr16	14161275	14165275	459.564	489
Mki67	ENSMUSG00000031004	1.53045	0.00196077	0.0196259	23.8	7.1	-0.251944	0.268104	-0.939726	0.347358	0.971931	chr7	135714361	135718361	106.712	131
1110059E24Rik	ENSMUSG00000035171	-1.63046	0.00196042	0.0196259	4.5	22.7	-0.126161	0.259334	-0.486481	0.626627	0.971931	chr19	21650976	21654976	746.26	680
Wbscr27	ENSMUSG00000040557	1.96093	0.00196218	0.0196271	20.3	4.4	-0.00555762	0.26856	-0.0206941	0.98349	0.997558	chr5	134930368	134934368	110.593	112
NA	ENSMUSG00000055763	-1.7754	0.00196304	0.0196271	6.6	31.2	0.0682231	0.279334	0.244235	0.807049	NA	chr13	66005737	66009737	72.4576	72
NA	ENSMUSG00000093125	1.74994	0.00196442	0.0196302	240.5	64.4	0.48762	0.276601	1.7629	0.0779171	0.845678	chr7	128476138	128480138	123.305	76
Hsd3b3	ENSMUSG00000062410	1.67613	0.00197134	0.0196886	9.8	2.3	-0.0826546	0.277467	-0.29789	0.765787	NA	chr3	98761127	98765127	72.4576	83
NA	ENSMUSG00000072963	1.9157	0.00197613	0.0197257	18.6	5.5	0.0118982	0.259072	0.0459263	0.963369	0.995679	chr11	53455110	53459110	154.596	144
NA	ENSMUSG00000081891	2.49363	0.0019775	0.0197285	10.4	0.8	-0.00207972	0.278813	-0.00745919	0.994048	NA	chrX	60816208	60820208	22.8813	26
Cenpq	ENSMUSG00000023919	-1.78191	0.00198769	0.0198194	2.3	19.8	-0.380749	0.266251	-1.43004	0.152706	0.945511	chr17	40933047	40937047	329.618	419
Uhrf1bp1l	ENSMUSG00000019951	0.800496	0.00199121	0.0198221	423.4	239.1	0.182301	0.25747	0.708046	0.478916	0.971931	chr10	89742991	89746991	933.246	686
NA	ENSMUSG00000097330	-0.876985	0.00199075	0.0198221	209.8	401.4	-0.223931	0.263108	-0.851098	0.394715	0.971931	chr18	37766242	37770242	136.81	160
Lgals1	ENSMUSG00000068220	1.67344	0.00199083	0.0198221	112	32.6	-0.0986272	0.241834	-0.407831	0.683398	0.972431	chr15	78924725	78928725	1140.45	1135
NA	ENSMUSG00000098178	1.96647	0.00199644	0.0198524	741087	231871	-0.549461	0.22627	-2.42834	0.0151679	0.458661	chr17	39844958	39848958	8787.8	8933
4933440J02Rik	ENSMUSG00000097082	-2.24707	0.0019959	0.0198524	0.6	15.4	0.0969389	0.263706	0.367602	0.71317	0.974849	chr10	111592273	111596273	500.766	393
Polr2e	ENSMUSG00000004667	1.4472	0.00199936	0.0198707	137.3	54.7	-0.238924	0.247832	-0.964054	0.335019	0.971931	chr10	80037795	80041795	402.514	441
NA	ENSMUSG00000085201	-1.8696	0.00200192	0.0198745	7.6	103.1	-0.254566	0.266941	-0.953643	0.340264	0.971931	chr2	38821257	38825257	892.816	983
Gpr21	ENSMUSG00000053164	-1.89614	0.00200191	0.0198745	2.2	19.3	-0.0873223	0.266385	-0.327805	0.743059	0.976504	chr2	37514332	37518332	121.761	127
Ankrd24	ENSMUSG00000054708	1.77349	0.00200879	0.0199319	101.3	36.7	-0.212921	0.262989	-0.809619	0.418159	0.971931	chr10	81626540	81630540	265.099	274
Vsig10l	ENSMUSG00000070604	1.32943	0.0020108	0.019941	79.3	33.5	0.106426	0.280963	0.378788	0.704845	NA	chr7	43461151	43465151	80.0847	76
Adssl1	ENSMUSG00000011148	1.17328	0.0020128	0.01995	479.6	223.3	-0.0229785	0.2512	-0.0914748	0.927115	0.992859	chr12	112618045	112622045	2020.23	2124
Lynx1	ENSMUSG00000022594	-1.31579	0.002015	0.019961	77.2	238	-0.340132	0.255571	-1.33087	0.18323	0.971931	chr15	74751046	74755046	532.46	643
Ptprn	ENSMUSG00000026204	1.21315	0.00201657	0.0199656	138.1	57.9	0.141068	0.278574	0.506392	0.612581	NA	chr1	75262502	75266502	90.2542	78
Mpc1	ENSMUSG00000023861	-1.32375	0.00203122	0.0200999	126	378.1	-0.0660341	0.243997	-0.270634	0.786672	0.98003	chr17	8280904	8284904	1229.73	1172
Kdm8	ENSMUSG00000030752	-2.25872	0.00203792	0.0201165	0.2	7.4	-0.272635	0.25186	-1.08249	0.279037	0.971931	chr7	125442676	125446676	526.121	595
Dnhd1	ENSMUSG00000030882	2.09198	0.00203684	0.0201165	4.5	0.6	-0.292469	0.262976	-1.11215	0.266073	0.971931	chr7	105648827	105652827	274.137	307
Rps6kb2	ENSMUSG00000024830	1.48168	0.00203841	0.0201165	565.7	210.4	-0.0907846	0.254517	-0.356693	0.721322	0.974849	chr19	4161354	4165354	256.062	239
NA	ENSMUSG00000022421	2.28252	0.0020374	0.0201165	4.7	0.4	-0.289759	0.279254	-1.03762	0.299448	NA	chr15	79802766	79806766	68.644	102
NA	ENSMUSG00000046580	1.88502	0.00203611	0.0201165	173.9	52.9	-0.103401	0.282385	-0.36617	0.714238	NA	chr12	76150627	76154627	53.3898	63
Notch3	ENSMUSG00000038146	-1.1162	0.00204998	0.0202198	58.1	138.2	-0.218629	0.269781	-0.810394	0.417714	0.971931	chr17	32164852	32168852	85.1694	111
Ift52	ENSMUSG00000017858	1.27547	0.00205679	0.020265	67	26.9	-0.124947	0.254146	-0.491635	0.622977	0.971931	chr2	163015354	163019354	187.43	201
Gm4461	ENSMUSG00000096169	-1.82284	0.00205602	0.020265	13.1	54.9	0.133766	0.285193	0.469036	0.639044	NA	chr17	33219690	33223690	59.7457	56
1110034G24Rik	ENSMUSG00000044991	-1.34726	0.00205966	0.0202714	664.8	2043.2	-0.380507	0.256542	-1.48321	0.138018	0.937994	chr2	132684931	132688931	1032.63	1321
Synpo	ENSMUSG00000043079	1.36705	0.00205895	0.0202714	633.8	263	0.243949	0.257778	0.94635	0.34397	0.971931	chr18	60658142	60662142	586.34	398
Chpt1	ENSMUSG00000060002	-1.65088	0.00206283	0.0202918	40.3	196	-0.203152	0.252216	-0.805469	0.420549	0.971931	chr10	88502073	88506073	1085.39	1376
Hhipl1	ENSMUSG00000021260	2.10846	0.00206644	0.0203053	9.4	1.9	0.162017	0.258962	0.625642	0.53155	0.971931	chr12	108304270	108308270	250.363	201
Selenbp2	ENSMUSG00000068877	-1.62416	0.00206603	0.0203053	17.1	86.7	-0.249177	0.277585	-0.897659	0.369367	NA	chr3	94691556	94695556	58.4745	81
Cdc42bpa	ENSMUSG00000026490	0.960967	0.00207376	0.0203663	204.3	106	-0.306364	0.258866	-1.18348	0.236618	0.971931	chr1	179958472	179962472	472.241	551
Arfgap3	ENSMUSG00000054277	1.4071	0.0020768	0.0203852	74.2	30.2	0.084626	0.260042	0.325432	0.744854	0.977116	chr15	83348247	83352247	310.287	244
Tle3	ENSMUSG00000032280	1.98696	0.00208179	0.0204004	25	8	0.348897	0.250882	1.39068	0.164322	0.95809	chr9	61370366	61374366	537.214	339
Phf21b	ENSMUSG00000016624	2.17345	0.00208295	0.0204004	48.4	13.3	-0.0606534	0.252526	-0.240187	0.810186	0.981104	chr15	84854049	84858049	216.16	216
Rasal1	ENSMUSG00000029602	2.52027	0.00208164	0.0204004	1.4	0.1	0.446846	0.276792	1.61438	0.106446	NA	chr5	120646812	120650812	91.5253	59
NA	ENSMUSG00000097175	-1.99266	0.00208109	0.0204004	12	186.4	0.130232	0.278373	0.467832	0.639905	NA	chr6	6328222	6332222	88.983	80
Speg	ENSMUSG00000026207	1.63383	0.00209192	0.0204677	2510.7	955.1	-0.208181	0.247541	-0.840997	0.40035	0.971931	chr1	75373297	75377297	1211.57	1517
Ino80dos	ENSMUSG00000084799	-1.6649	0.00209767	0.020502	14	60	-0.202946	0.251824	-0.805904	0.420298	0.971931	chr1	63111078	63115078	795.112	841
Mast3	ENSMUSG00000031833	1.6683	0.00209739	0.020502	57.4	20.5	0.0204643	0.260157	0.0786614	0.937302	0.993657	chr8	70803054	70807054	157.332	149
Slco3a1	ENSMUSG00000025790	1.0977	0.00210089	0.0205224	435.8	205.6	0.0754436	0.246355	0.306239	0.759422	0.977711	chr7	74552780	74556780	1113.49	909
NA	ENSMUSG00000051805	-2.41432	0.00210353	0.0205373	0.2	4.3	-0.114718	0.270102	-0.424722	0.67104	0.972431	chr13	69542023	69546023	788.374	707
Zfp618	ENSMUSG00000028358	2.15121	0.00211114	0.0205895	1.2	0.2	0.166733	0.281206	0.592922	0.553234	NA	chr4	62963573	62967573	62.2881	54
Smc5	ENSMUSG00000024943	0.971347	0.00212223	0.0206866	127.8	65.5	0.183302	0.267229	0.685937	0.492753	0.971931	chr19	23271897	23275897	181.958	141
NA	ENSMUSG00000088310	1.81107	0.00212352	0.0206882	494.4	131.3	0.207868	0.282654	0.735414	0.462088	NA	chr19	11693041	11697041	58.4745	47
Smim20	ENSMUSG00000061461	-1.58359	0.00213573	0.020796	25.1	109.1	-0.128726	0.25189	-0.511042	0.609322	0.971931	chr5	53265083	53269083	786.689	780
Jak1	ENSMUSG00000028530	-0.929307	0.00214024	0.0208289	185.9	366.5	0.0642564	0.259428	0.247685	0.804378	0.980513	chr4	101263282	101267282	524.536	425
Apoe	ENSMUSG00000002985	-1.2668	0.00214961	0.0209089	52.2	151.4	-0.333271	0.254736	-1.3083	0.190771	0.971931	chr7	19697188	19701188	248.531	290
NA	ENSMUSG00000072675	2.33822	0.00215137	0.0209149	10.5	1.7	0.326511	0.283865	1.15023	0.250049	NA	chr14	26116349	26120349	54.661	37
Phrf1	ENSMUSG00000038611	1.43059	0.00215581	0.0209358	268.7	112	-0.0898359	0.256534	-0.350191	0.726195	0.974849	chr7	141226784	141230784	511.859	485
Mylk	ENSMUSG00000022836	1.58196	0.00215531	0.0209358	52.5	20.3	0.0922513	0.27063	0.340876	0.733197	NA	chr16	34743210	34747210	91.5253	87
Sox13	ENSMUSG00000070643	2.12727	0.00216279	0.0209924	30.2	12	-0.354547	0.256253	-1.38358	0.166486	0.95809	chr1	133422377	133426377	184.694	241
4921507P07Rik	ENSMUSG00000029828	-1.93887	0.00216599	0.0210012	2.3	22.7	-0.246612	0.258866	-0.952665	0.34076	0.971931	chr6	50594632	50598632	146.387	175
NA	ENSMUSG00000100204	1.16793	0.00216495	0.0210012	92.5	38.9	0.171608	0.284034	0.604181	0.545723	NA	chr1	19328939	19332939	67.3728	57
Gm15941	ENSMUSG00000086992	-2.3183	0.00217534	0.02104	0.2	3.9	-0.445502	0.244491	-1.82216	0.0684301	0.815127	chr15	37431414	37435414	309.017	419
Endod1	ENSMUSG00000037419	1.97422	0.00217295	0.02104	9.7	2.2	0.149726	0.260683	0.574362	0.565723	0.971931	chr9	14379507	14383507	361.499	262
Rbm12b2	ENSMUSG00000052137	-0.889072	0.00217492	0.02104	87.3	168.3	-0.272107	0.248827	-1.09356	0.274148	0.971931	chr4	12087439	12091439	343.88	393
Cyfip1	ENSMUSG00000030447	1.43421	0.00217575	0.02104	87.4	35.7	-0.0964761	0.250503	-0.385129	0.700142	0.974693	chr7	55839745	55843745	424.7	426
NA	ENSMUSG00000066170	-1.8853	0.00217253	0.02104	1	10.6	-0.0789151	0.253528	-0.311268	0.755597	0.977711	chr17	28520720	28524720	451.64	426
Cpox	ENSMUSG00000022742	-1.76841	0.00218294	0.0210983	7.2	38.3	-0.330575	0.249938	-1.32263	0.185958	0.971931	chr16	58668292	58672292	678.877	809
Snai1	ENSMUSG00000042821	2.16874	0.00218921	0.0211477	8.4	0.5	0.141222	0.260237	0.542664	0.587361	0.971931	chr2	167536195	167540195	172.381	144
Slc25a15	ENSMUSG00000031482	-1.98598	0.00219789	0.0212062	0.6	8.2	-0.572791	0.247656	-2.31285	0.020731	0.528684	chr8	22396597	22400597	370.82	554
Ccdc12	ENSMUSG00000019659	1.5888	0.00219692	0.0212062	44.2	13.7	-0.131442	0.258034	-0.509398	0.610473	0.971931	chr9	110654503	110658503	800.166	790
NA	ENSMUSG00000093148	1.45528	0.00219875	0.0212062	656.4	229.2	0.226194	0.284988	0.793696	0.427372	NA	chr6	133759770	133763770	66.1016	52
Nme4	ENSMUSG00000024177	-2.37327	0.00220885	0.0212901	0.3	8.8	-0.244521	0.259493	-0.942301	0.346039	0.971931	chr17	26093602	26097602	147.755	179
Zfp229	ENSMUSG00000061544	-1.24572	0.00220978	0.0212901	6.3	17.9	0.00608434	0.283234	0.0214817	0.982861	NA	chr17	21728795	21732795	52.1186	54
Prss46	ENSMUSG00000049719	2.45206	0.00221415	0.021321	17.9	0.1	0.176468	0.272975	0.646464	0.517979	NA	chr9	110842506	110846506	90.2542	78
Uvrag	ENSMUSG00000035354	-0.837068	0.00221605	0.021328	30.6	56.4	-0.190094	0.247717	-0.767385	0.442853	0.971931	chr7	99139141	99143141	541.968	565
Eif4g3	ENSMUSG00000028760	1.33994	0.00221979	0.0213528	545.3	230.4	-0.289664	0.249273	-1.16204	0.245221	0.971931	chr4	137991022	137995022	494.427	572
NA	ENSMUSG00000065078	2.2861	0.00223822	0.0215187	83.9	2.9	-0.205018	0.262459	-0.781144	0.434718	0.971931	chr6	29961555	29965555	139.546	161
Kif1c	ENSMUSG00000020821	1.40782	0.00224771	0.0215986	439.7	185.2	-0.304053	0.24603	-1.23584	0.21652	0.971931	chr11	70698548	70702548	1025.17	1415
Bag6	ENSMUSG00000024392	1.66969	0.00225776	0.0216791	571.8	214	-0.203864	0.244343	-0.834335	0.404093	0.971931	chr17	35133178	35137178	448.471	476
NA	ENSMUSG00000081098	2.07746	0.00225847	0.0216791	62.3	12.9	0.191823	0.271155	0.707427	0.479301	0.971931	chr11	53927476	53931476	138.178	112
Efhb	ENSMUSG00000023931	2.46272	0.00226111	0.0216932	3.1	0.1	0.187703	0.266236	0.705026	0.480794	0.971931	chr17	53461321	53465321	111.864	97
Dram1	ENSMUSG00000020057	-2.20623	0.00227442	0.0218093	0.9	57.5	-0.0790003	0.262496	-0.300958	0.763447	0.977989	chr10	88377080	88381080	1140.45	1051
Anxa5	ENSMUSG00000027712	1.04252	0.00228087	0.0218598	520.3	249.5	0.0188149	0.250545	0.0750961	0.940138	0.993679	chr3	36473894	36477894	963.568	819
Bco1	ENSMUSG00000031845	2.33336	0.00228281	0.0218668	4.3	0.4	0.891994	0.273731	3.25866	0.00111941	0.130626	chr8	117093854	117097854	221.633	78
Maz	ENSMUSG00000030678	1.17683	0.00228634	0.0218892	148	67.3	-0.121851	0.251797	-0.483925	0.628439	0.971931	chr7	127025037	127029037	781.635	713
Erc2	ENSMUSG00000040640	1.75719	0.00229163	0.021912	70.1	21.4	0.34207	0.27226	1.25641	0.208968	0.971931	chr14	27620428	27624428	118.22	84
Atp5g1	ENSMUSG00000006057	-1.42818	0.00229232	0.021912	52.3	165.8	-0.0920555	0.256395	-0.359039	0.719566	0.974849	chr11	96073670	96077670	749.629	671
1700017B05Rik	ENSMUSG00000032300	1.77134	0.00229214	0.021912	31.9	9.2	0.0866492	0.243688	0.355574	0.72216	0.974849	chr9	57260612	57264612	543.553	445
Lphn3	ENSMUSG00000037605	1.917	0.0022994	0.0219566	15.7	4.3	-0.236027	0.269849	-0.874662	0.381758	0.971931	chr5	81018138	81022138	85.1694	112
Mknk2	ENSMUSG00000020190	1.47758	0.00229831	0.0219566	303.2	122.8	-0.0119796	0.248415	-0.048224	0.961538	0.995327	chr10	80676112	80680112	1436.67	1534
Abcc5	ENSMUSG00000022822	1.32261	0.00230468	0.0219956	833.9	359.3	-0.157837	0.263802	-0.598317	0.549629	0.971931	chr16	20424394	20428394	938.299	927
Caskin2	ENSMUSG00000034471	1.55277	0.00230751	0.0219997	128.1	49.5	-0.14769	0.243316	-0.606989	0.543858	0.971931	chr11	115811639	115815639	761.421	770
Gmeb2	ENSMUSG00000038705	1.43032	0.00230729	0.0219997	109.4	43.4	-0.20242	0.258982	-0.7816	0.43445	0.971931	chr2	181286035	181290035	434.208	459
Sgsh	ENSMUSG00000005043	1.83011	0.00231626	0.0220577	43.1	13.7	0.11542	0.257417	0.448376	0.653882	0.971931	chr11	119353536	119357536	223.001	189
LOC102635447	ENSMUSG00000087578	-1.90332	0.00231723	0.0220577	1.6	31.6	-0.0731059	0.261608	-0.279448	0.779901	0.98003	chr6	83107054	83111054	416.777	384
NA	ENSMUSG00000083579	2.01602	0.00231698	0.0220577	400.3	110	-0.0236077	0.282973	-0.0834274	0.933512	NA	chr16	3924428	3928428	50.8474	56
Fam174b	ENSMUSG00000078670	-1.62111	0.00231972	0.02207	12.7	65.8	-0.290783	0.240862	-1.20726	0.227331	0.971931	chr7	73738302	73742302	1012.27	1410
Mapk8ip3	ENSMUSG00000024163	1.22379	0.00232896	0.022136	625.6	282	-0.313753	0.274218	-1.14417	0.252552	0.971931	chr17	24934977	24938977	316.312	361
Ell	ENSMUSG00000070002	1.54231	0.00232908	0.022136	581.6	229.8	0.257571	0.240852	1.06941	0.284884	0.971931	chr8	70537457	70541457	966.937	686
Slc6a20b	ENSMUSG00000025243	-1.63592	0.00233438	0.0221748	7.5	39.6	-0.30336	0.284398	-1.06667	0.286119	NA	chr9	123630565	123634565	43.2203	68
Usp17lc	ENSMUSG00000058976	-1.99551	0.00234214	0.0222369	0.7	7.2	-0.912186	0.281244	-3.2434	0.00118112	0.133338	chr7	103413072	103417072	47.0339	145
Kmt2b	ENSMUSG00000006307	1.336	0.002344	0.0222431	333.7	140	-0.246144	0.242803	-1.01376	0.310698	0.971931	chr7	30586726	30590726	673.824	696
Plcl2	ENSMUSG00000038910	1.56092	0.00235443	0.0223304	49	13.4	-0.19383	0.262031	-0.739719	0.45947	0.971931	chr17	50507403	50511403	281.668	285
Mllt6	ENSMUSG00000038437	1.36039	0.00235879	0.0223602	367.3	157.8	-0.322748	0.255226	-1.26456	0.206031	0.971931	chr11	97661414	97665414	680.562	801
NA	ENSMUSG00000083627	1.95705	0.00236988	0.0224536	81.1	22.7	-0.459899	0.257025	-1.78932	0.0735639	0.830566	chr3	108017885	108021885	429.454	589
Rasgrp3	ENSMUSG00000071042	-1.09349	0.00237234	0.0224537	19.1	42.9	-0.63265	0.263736	-2.3988	0.0164488	0.47325	chr17	75433896	75437896	146.387	258
NA	ENSMUSG00000094326	-1.54683	0.00237149	0.0224537	44.1	150.1	-0.199656	0.272236	-0.733392	0.463319	0.971931	chr17	29306138	29310138	88.983	114
Spata25	ENSMUSG00000017767	-2.03572	0.00237727	0.0224886	1.7	44.2	-0.0710779	0.27232	-0.261009	0.794086	0.980398	chr2	164826537	164830537	105.508	116
NA	ENSMUSG00000074506	-1.98176	0.00239212	0.0226174	3.9	58.6	0.0212747	0.28391	0.0749347	0.940267	NA	chr3	87206005	87210005	47.0339	46
Slc39a14	ENSMUSG00000022094	1.07134	0.00239837	0.0226648	525.8	250.4	0.130082	0.248514	0.523439	0.600669	0.971931	chr14	70349425	70353425	1371.23	1074
Atp9a	ENSMUSG00000027546	1.44519	0.00240478	0.0227136	103.3	37.8	0.275185	0.266258	1.03353	0.301357	0.971931	chr2	168740409	168744409	212.056	152
Bend7	ENSMUSG00000048186	1.48699	0.00240871	0.0227389	40.9	15.2	-0.0465839	0.273953	-0.170043	0.864976	0.98619	chr2	4715831	4719831	194.271	183
NA	ENSMUSG00000078894	-1.41487	0.00241218	0.0227599	7.5	27.4	-0.258461	0.281847	-0.917027	0.359128	NA	chr2	176224569	176228569	22.8813	33
[truncated: 38,071 more rows]
