# Supplementary figures and images for: Epigenetic State Changes Underlie Metabolic Switch in Mouse Post-Infarction Border Zone Cardiomyocytes
Source: MDPI journal article supplement (doi:10.3390/jcdd8110134), 2021-10-22

Supplemental Figure S4

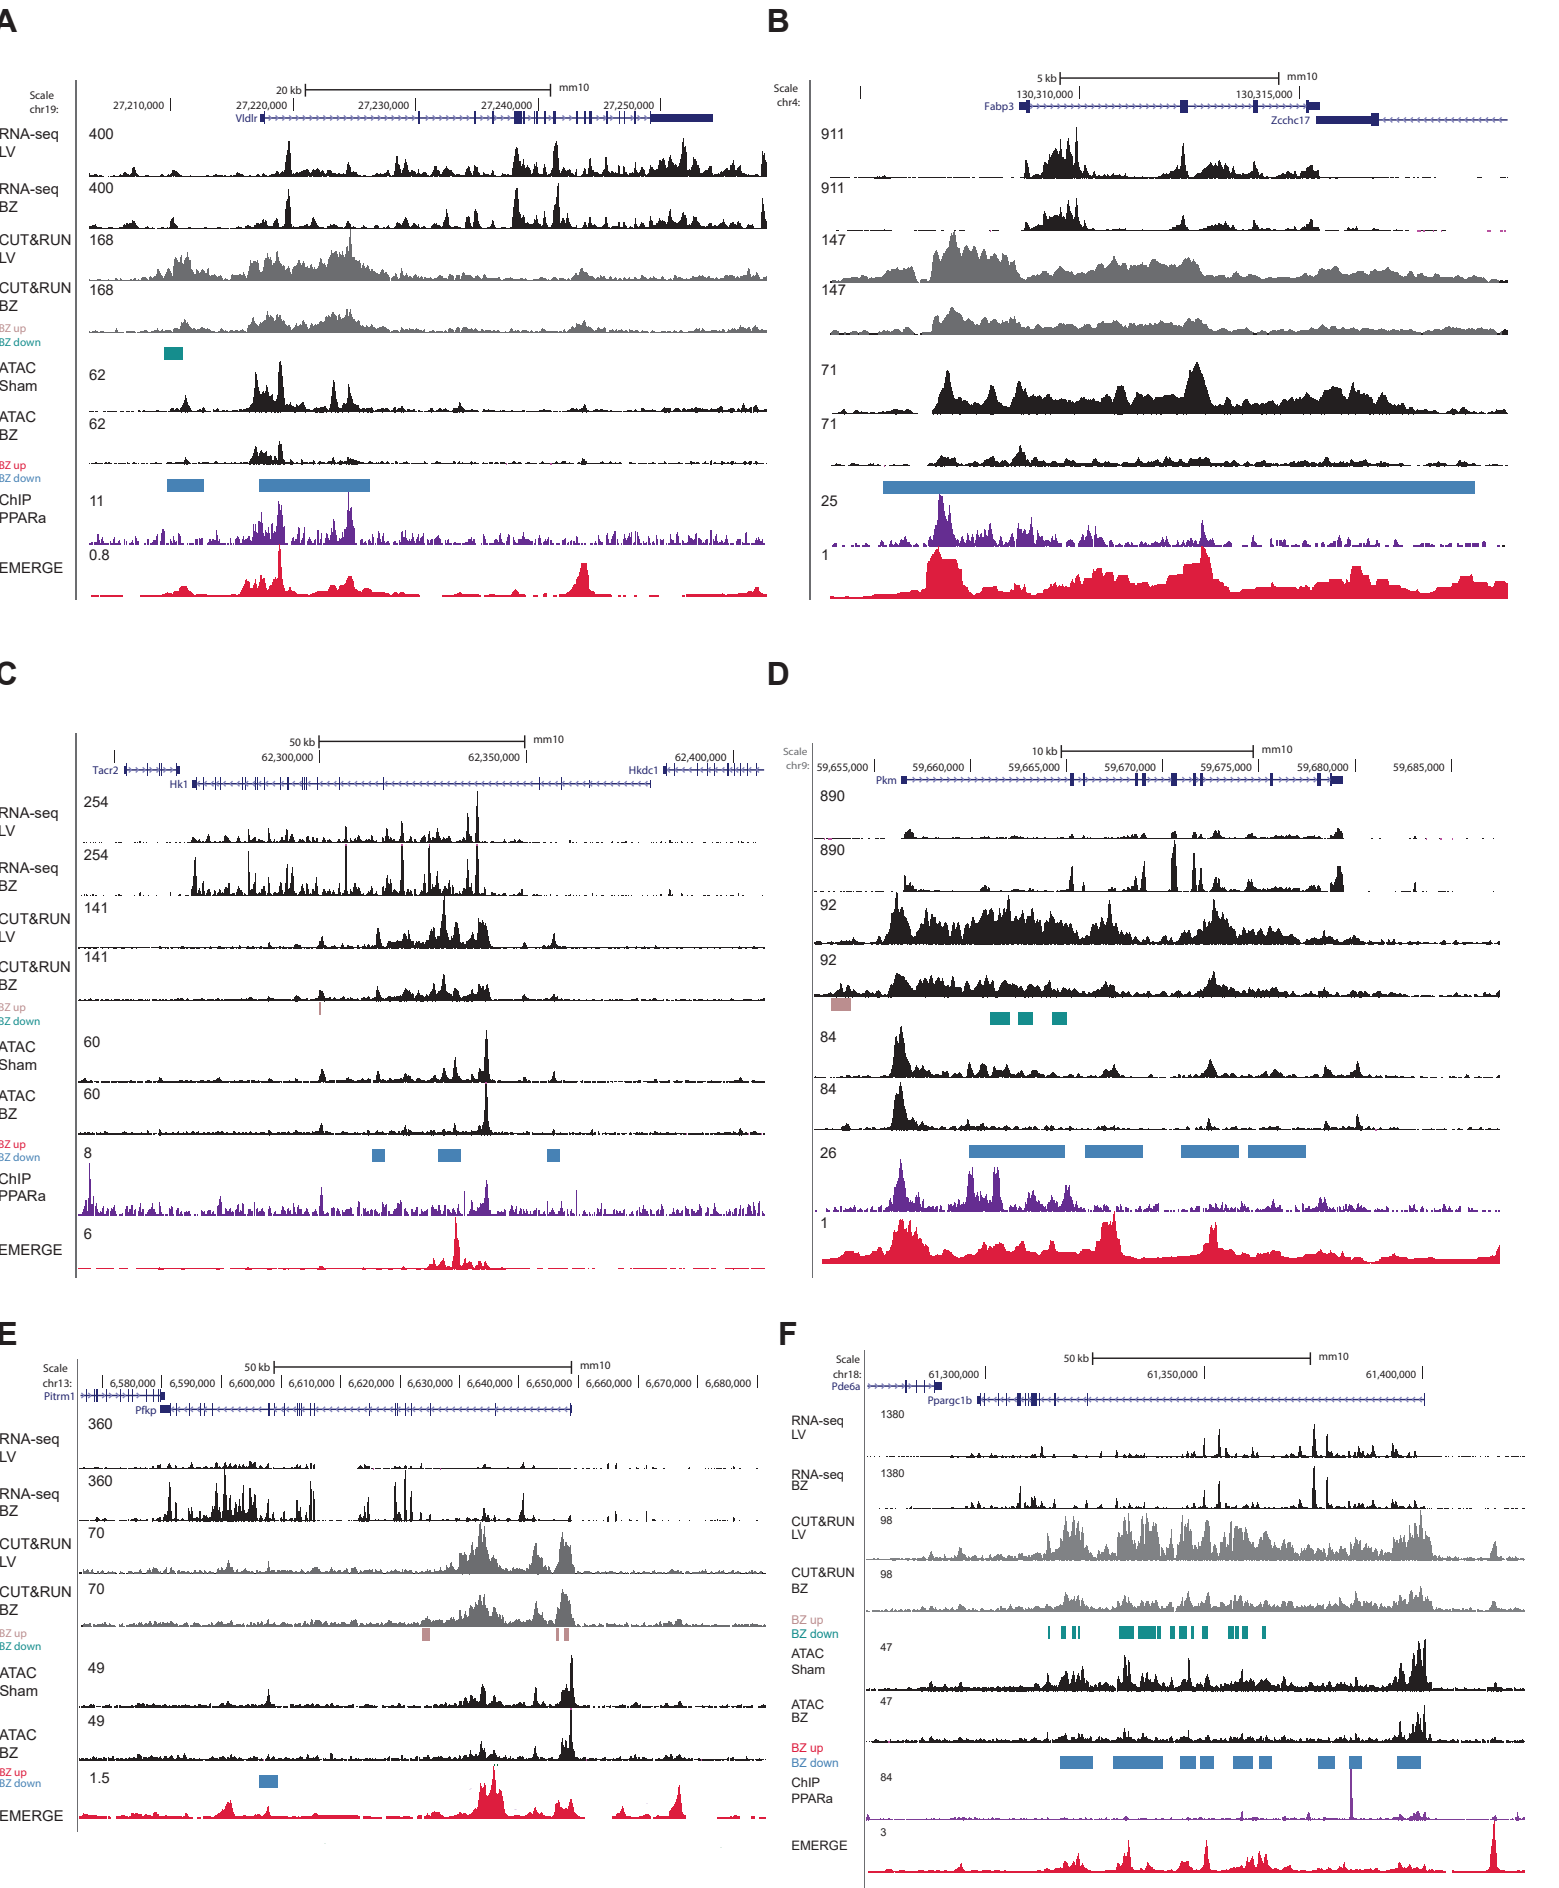

Supplement: s1 [file s1]

Supplemental Figure S1

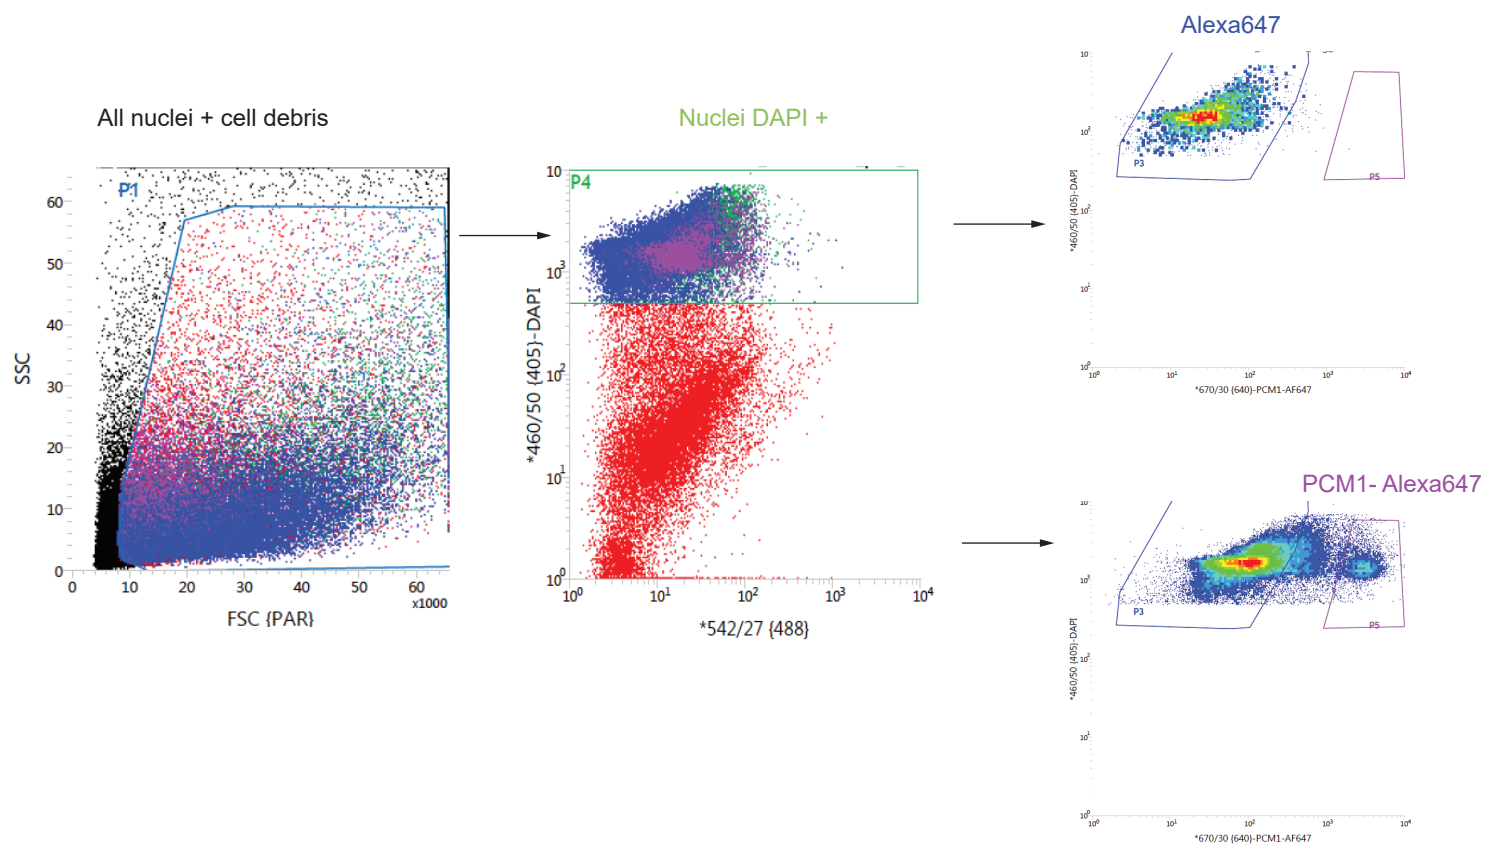

Supplement: s1 [file s1]

Supplemental Figure S2

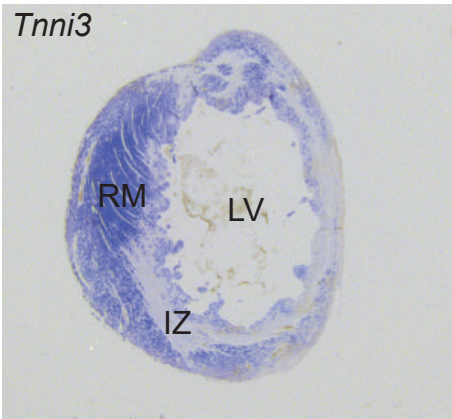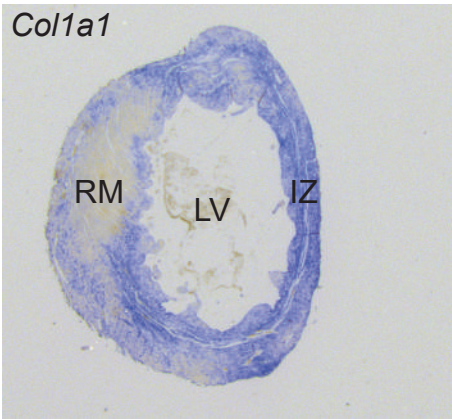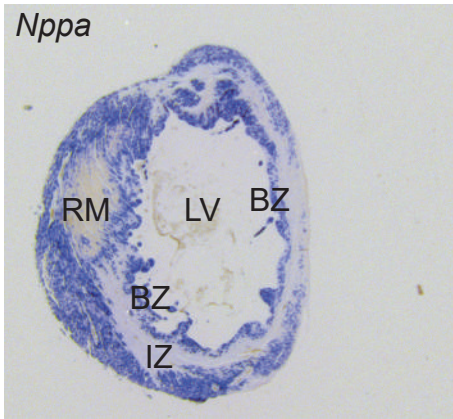

Supplement: s1 [file s1]

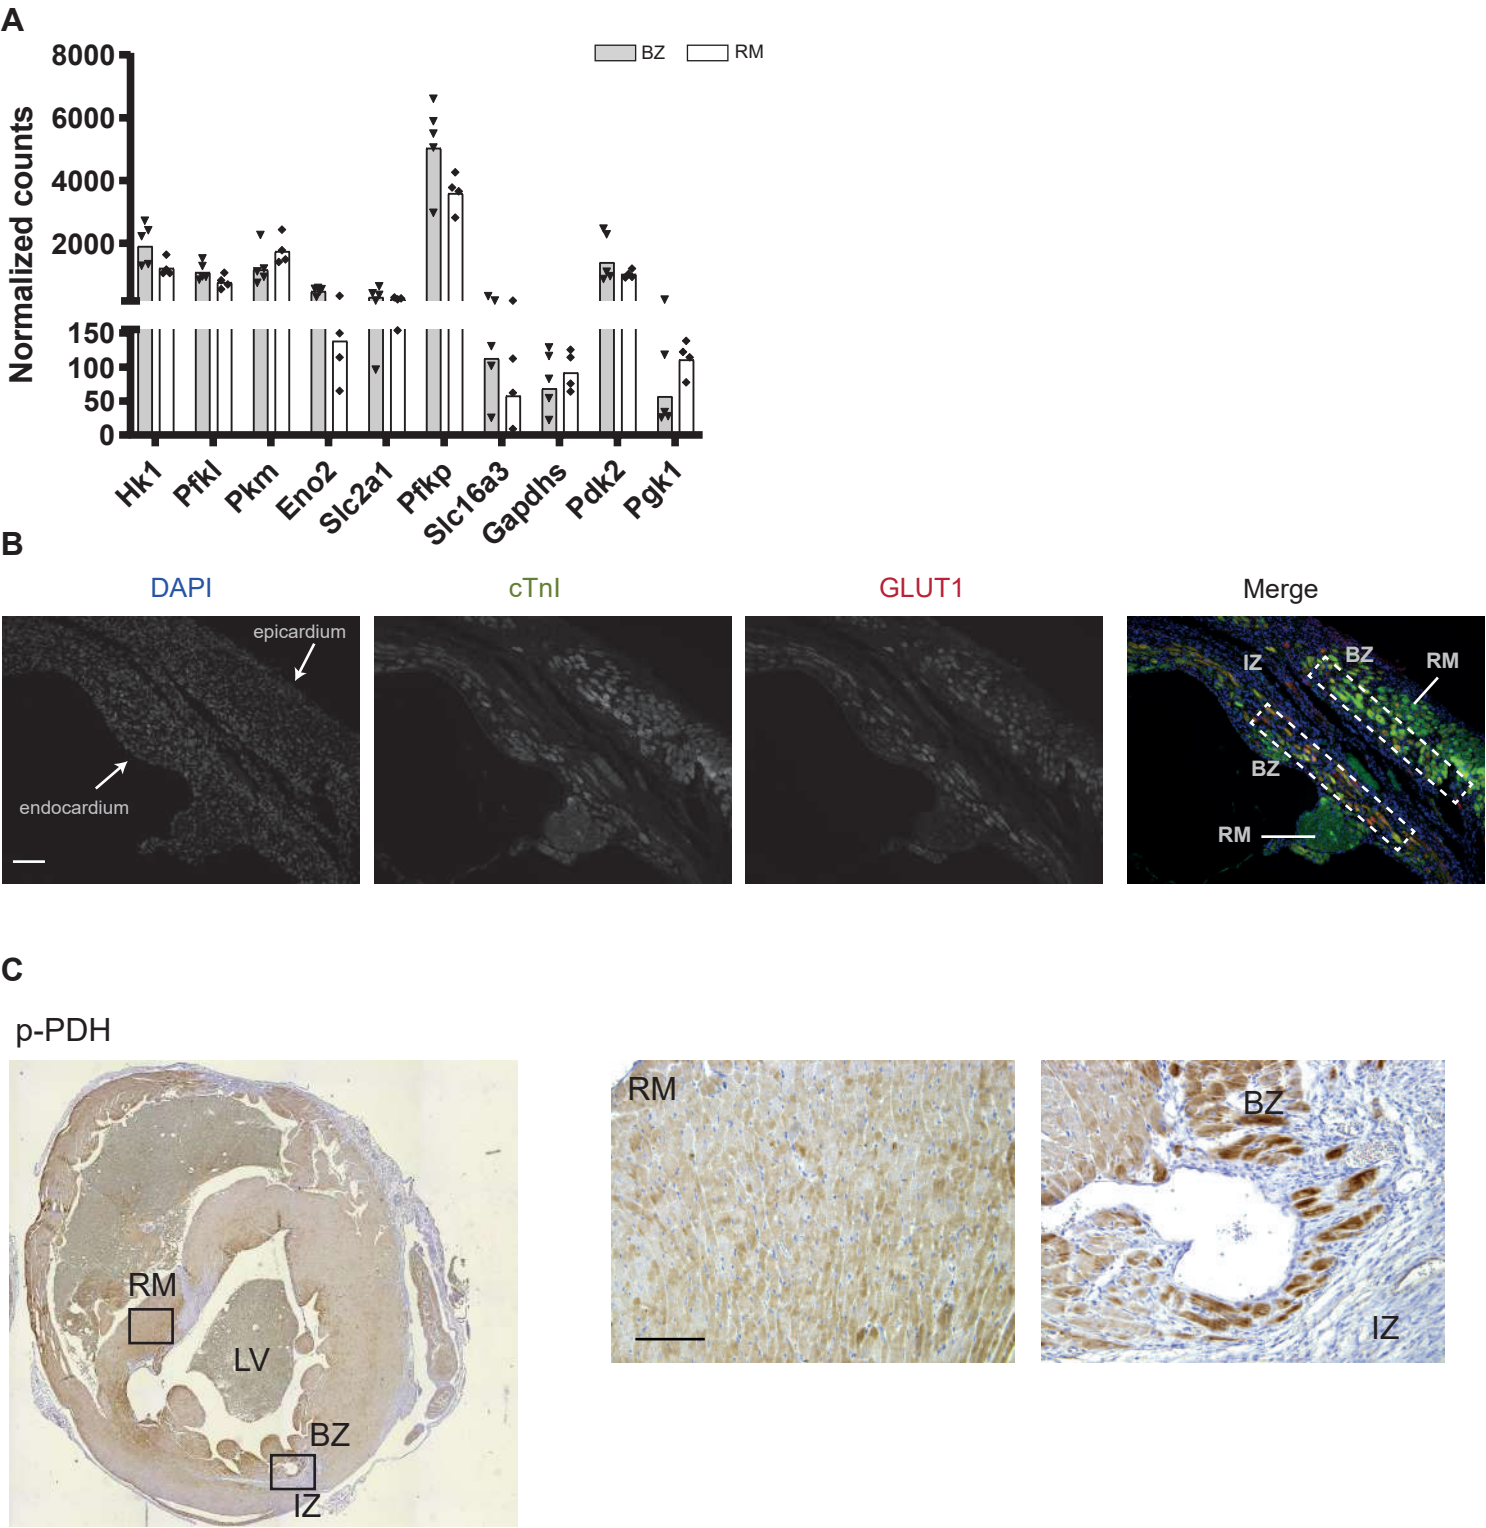

Supplement: s1 [file s1]
